# Supplementary material for: Hospital-treated infectious diseases and the risk of dementia: a large, multicohort, observational study with a replication cohort
Source: PubMed Central journal article supplement (PMC8592915; doi:10.1016/s1473-3099(21)00144-4), 2021-11
Supplement: mmc1.pdf [file mmc1.pdf]

# THE LANCET

## Infectious Diseases

### Supplementary appendix

This appendix formed part of the original submission and has been peer reviewed. We post it as supplied by the authors.

Supplement to: Sipilä PN, Heikkilä N, Lindbohm JV, et al. Hospital-treated infectious diseases and the risk of dementia: a large, multicohort, observational study with a replication cohort. *Lancet Infect Dis* 2021; published online June 21. [https://doi.org/10.1016/S1473-3099\(21\)00144-4](https://doi.org/10.1016/S1473-3099(21)00144-4).

# Supplementary appendix

Sipilä PN, Heikkilä N, Lindbohm JV, Hakulinen C, Vahtera J, Elovainio M, Suominen S, Väänänen A, Koskinen A, Nyberg ST, Pentti J, Strandberg TE, Kivimäki M. Hospital-treated infectious diseases and the risk of dementia: a large, multicohort, observational study with a replication cohort in the UK Biobank

## CONTENTS

|                                                                                                                                                                                                                                                                             |    |
|-----------------------------------------------------------------------------------------------------------------------------------------------------------------------------------------------------------------------------------------------------------------------------|----|
| eFigure 1. Selection of participants in the primary analysis (Finnish multicohort sample) .....                                                                                                                                                                             | 4  |
| eMethods 1. Study cohorts and data collection .....                                                                                                                                                                                                                         | 5  |
| The Finnish Public Sector study (FPS) .....                                                                                                                                                                                                                                 | 5  |
| The Health and Social Support study (HeSSup).....                                                                                                                                                                                                                           | 6  |
| The Still Working study (STW) .....                                                                                                                                                                                                                                         | 6  |
| UK Biobank.....                                                                                                                                                                                                                                                             | 7  |
| eTable 1. Characteristics of participants at baseline by cohort in the primary analysis (Finnish multicohort sample).....                                                                                                                                                   | 9  |
| eTable 2. Characteristics of participants at baseline in the replication cohort (UK Biobank) .....                                                                                                                                                                          | 10 |
| eMethods 2. Proportionality of hazards .....                                                                                                                                                                                                                                | 11 |
| Supplementary references .....                                                                                                                                                                                                                                              | 12 |
| eFigure 2. Visualisation of hazard ratios over time using exponentiated scaled Schoenfeld residuals in the primary cohort (Finnish multicohort sample).....                                                                                                                 | 13 |
| eFigure 3. Distribution of age at dementia diagnosis in the primary cohort (Finnish multicohort sample).....                                                                                                                                                                | 16 |
| eFigure 4. Nelson-Aalen cumulative hazard estimate for the association of any hospital-treated infectious disease with dementia in the primary cohort (Finnish multicohort sample) .....                                                                                    | 17 |
| eTable 3. N (total), N (dementia), and age-standardised dementia incidence rate for the groups with vs without hospital-treated infectious diseases in the primary cohort (Finnish multicohort sample) .....                                                                | 18 |
| eFigure 5. Risk of dementia associated with the most common Gram-positive and Gram-negative infections in the primary cohort (Finnish multicohort sample) .....                                                                                                             | 19 |
| eFigure 6. Risk of dementia associated with herpes simplex virus 1 or 2 infection, other herpesvirus infection, and any mild herpesvirus infection in the primary cohort (Finnish multicohort sample).....                                                                  | 20 |
| eFigure 7. Competing-risk models for the risk of dementia associated with any hospital-treated infectious disease, bacterial infections, and viral infections in the primary cohort (Finnish multicohort sample).....                                                       | 21 |
| eFigure 8. Risk of Alzheimer's disease (AD) and non-AD dementia associated with any hospital-treated infectious disease and with specific bacterial and viral infections in the primary cohort (Finnish multicohort sample).....                                            | 22 |
| eTable 4. Risk of dementia associated with any hospital-treated infectious disease in relation to follow ups, types of dementia, adjustments, and exclusions of participant groups in the primary and replication cohorts (Finnish multicohort sample and UK Biobank) ..... | 23 |
| eFigure 9. Risk of dementia associated with chronicity and predisposition of the infection towards entering the central nervous system (CNS) in the primary cohort (Finnish multicohort sample).....                                                                        | 24 |
| eFigure 10. Selection of participants for time-dependent analysis in the primary analysis (Finnish multicohort sample).....                                                                                                                                                 | 25 |

|                                                                                                                                                                                                                                                                          |     |
|--------------------------------------------------------------------------------------------------------------------------------------------------------------------------------------------------------------------------------------------------------------------------|-----|
| eFigure 11. Risk of dementia associated with hospital-treated infectious diseases in time-dependent analysis in the full follow up and after 10 or more years from the onset of infection in the primary cohort (Finnish multicohort sample) .....                       | 26  |
| eFigure 12. Multivariable-adjusted associations between hospital-treated infections and dementia by dementia type using time-dependent analysis in the replication cohort (UK Biobank).....                                                                              | 27  |
| eFigure 13. Risk of dementias associated with infection burden, simultaneous infections, and central nervous system (CNS) vs extra-CNS infections using time-dependent analysis in the primary and replication cohorts (Finnish multicohort sample and UK Biobank) ..... | 28  |
| eTable 5. Classification of hospital-treated infectious diseases in the study on diagnosis level .....                                                                                                                                                                   | 29  |
| All infectious diseases.....                                                                                                                                                                                                                                             | 29  |
| All bacterial infections .....                                                                                                                                                                                                                                           | 53  |
| Invasive bacterial infections .....                                                                                                                                                                                                                                      | 63  |
| Localised bacterial infections .....                                                                                                                                                                                                                                     | 71  |
| Bacterial infections with sepsis .....                                                                                                                                                                                                                                   | 73  |
| Bacterial infections without sepsis.....                                                                                                                                                                                                                                 | 74  |
| Intracellular bacterial infections .....                                                                                                                                                                                                                                 | 83  |
| Extracellular bacterial infections .....                                                                                                                                                                                                                                 | 86  |
| Gram-positive bacterial infections .....                                                                                                                                                                                                                                 | 89  |
| Gram-negative bacterial infections .....                                                                                                                                                                                                                                 | 91  |
| Mycobacterial infections .....                                                                                                                                                                                                                                           | 95  |
| Mycoplasma infections .....                                                                                                                                                                                                                                              | 96  |
| Central nervous system infections .....                                                                                                                                                                                                                                  | 96  |
| Extra-central nervous system infections .....                                                                                                                                                                                                                            | 97  |
| Acute infections.....                                                                                                                                                                                                                                                    | 115 |
| Chronic infections.....                                                                                                                                                                                                                                                  | 128 |
| Infections predisposed towards entering the central nervous system.....                                                                                                                                                                                                  | 134 |
| Infections not predisposed towards entering the central nervous system.....                                                                                                                                                                                              | 143 |
| All viral infections .....                                                                                                                                                                                                                                               | 153 |
| Acute viral infections .....                                                                                                                                                                                                                                             | 157 |
| Herpesvirus infections.....                                                                                                                                                                                                                                              | 159 |
| Other potentially persistent viral infections.....                                                                                                                                                                                                                       | 160 |
| Parasitic infections .....                                                                                                                                                                                                                                               | 161 |
| Fungal infections (mycoses).....                                                                                                                                                                                                                                         | 163 |
| eTable 6. ICD-10 codes for infectious diseases with the corresponding ICD-8 and ICD-9 codes .....                                                                                                                                                                        | 166 |
| eTable 7. Distribution of all infections in primary analysis (Finnish multicohort sample).....                                                                                                                                                                           | 194 |
| eTable 8. Distribution of bacterial infections in primary analysis (Finnish multicohort sample) .....                                                                                                                                                                    | 208 |
| eTable 9. Distribution of invasive bacterial infections in primary analysis (Finnish multicohort sample)....                                                                                                                                                             | 217 |
| eTable 10. Distribution of localised bacterial infections in primary analysis (Finnish multicohort sample) .....                                                                                                                                                         | 224 |
| eTable 11. Distribution of bacterial infections with sepsis in primary analysis (Finnish multicohort sample) .....                                                                                                                                                       | 226 |

|                                                                                                                                                          |     |
|----------------------------------------------------------------------------------------------------------------------------------------------------------|-----|
| eTable 12. Distribution of bacterial infections without sepsis in primary analysis (Finnish multicohort sample).....                                     | 227 |
| eTable 13. Distribution of extracellular bacterial infections in primary analysis (Finnish multicohort sample) .....                                     | 235 |
| eTable 14. Distribution of intracellular bacterial infections in primary analysis (Finnish multicohort sample) .....                                     | 238 |
| eTable 15. Distribution of Gram-positive bacterial infections in primary analysis (Finnish multicohort sample).....                                      | 241 |
| eTable 16. Distribution of Gram-negative bacterial infections in primary analysis (Finnish multicohort sample).....                                      | 242 |
| eTable 17. Distribution of viral infections in primary analysis (Finnish multicohort sample).....                                                        | 245 |
| eTable 18. Distribution of herpesvirus infections in primary analysis (Finnish multicohort sample) .....                                                 | 249 |
| eTable 19. Distribution of other potentially persistent viral infections in primary analysis (Finnish multicohort sample) .....                          | 249 |
| eTable 20. Distribution of acute viral infections in primary analysis (Finnish multicohort sample) .....                                                 | 250 |
| eTable 21. Distribution of central nervous system infections in primary analysis (Finnish multicohort sample) .....                                      | 252 |
| eTable 22. Distribution of extra-central nervous system infections in primary analysis (Finnish multicohort sample).....                                 | 254 |
| eTable 23. Distribution of acute infections in primary analysis (Finnish multicohort sample) .....                                                       | 268 |
| eTable 24. Distribution of chronic infections in primary analysis (Finnish multicohort sample) .....                                                     | 278 |
| eTable 25. Distribution of infections predisposed towards entering the central nervous system in primary analysis (Finnish multicohort sample) .....     | 283 |
| eTable 26. Distribution of infections not predisposed towards entering the central nervous system in primary analysis (Finnish multicohort sample) ..... | 290 |
| eMethods 3. Stata code for data analysis .....                                                                                                           | 299 |

**eFigure 1. Selection of participants in the primary analysis (Finnish multicohort sample)**

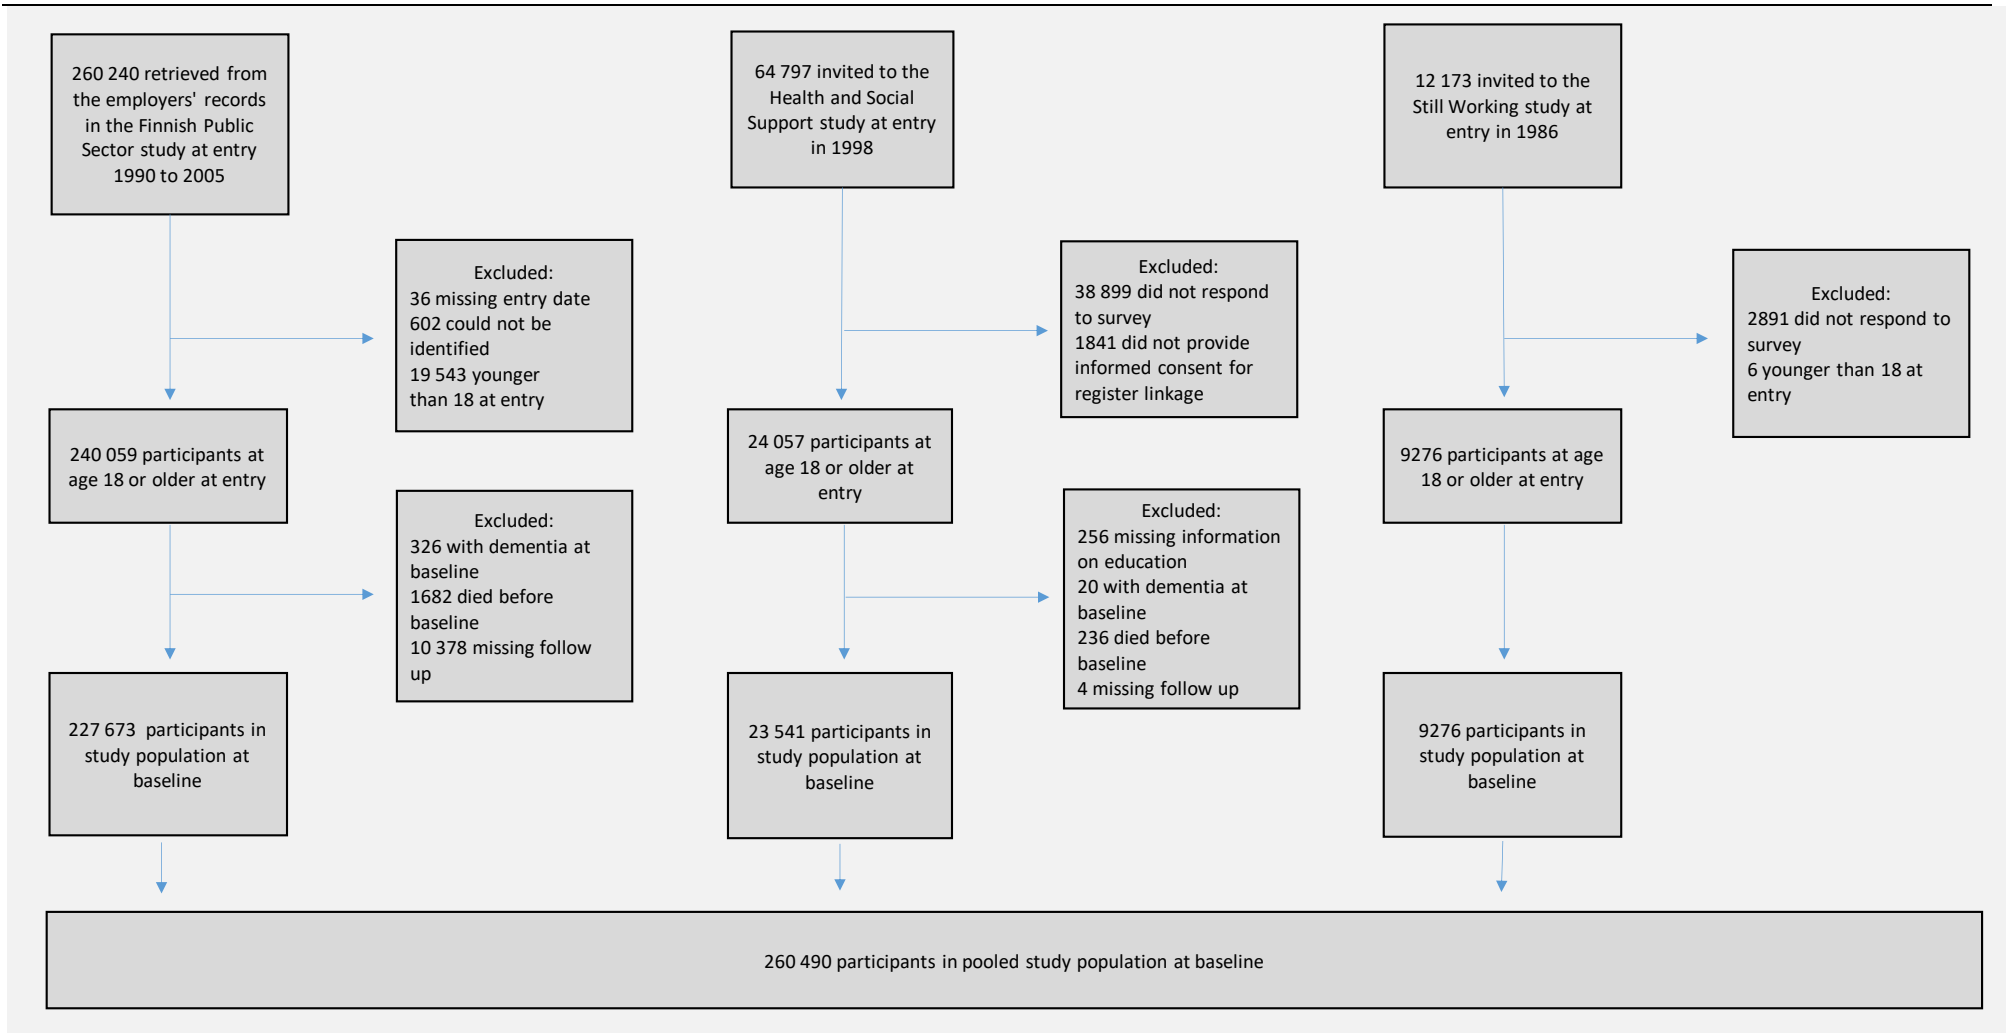

## eMethods 1. Study cohorts and data collection

### The Finnish Public Sector study (FPS)

The prospective Finnish Public Sector cohort study comprises 260 240 public sector employees from 10 Finnish towns and 6 Finnish hospital districts identified from the employers' registers in 1990-2005.<sup>5</sup> 240 048 of them were available for this study and were linked to national registries of hospital discharge information (dates and diagnoses recorded by the Finnish Institute for Health and Welfare) and medication reimbursement entitlements (dates and indications recorded by the Finnish Social Insurance Institution) using the personal identification codes unique to each Finnish citizen. We also linked the participants to records on dates and causes of death from Statistics Finland. The ethics committee of Helsinki and Uusimaa Hospital District approved the register linkage and data analysis.

#### *Diagnoses of hospital-treated infectious diseases (index infections)*

We retrieved both primary and secondary diagnoses of hospital-treated diseases from inpatient hospital discharge information from 1 January 1980 to 31 December 2016, using the International Classification of Diseases, 10th Revision (ICD-10). The diagnosis codes from the 8th and 9th revisions (ICD-8 and ICD-9) were converted into the corresponding ICD-10 codes according to the national editions of the International Classification of Diseases (eTable 6 in this Supplement).<sup>2-4</sup>

#### *Covariates*

Participants' birthdate and sex were retrieved from the Finnish Population Information System. Information on the participants' education was available from Statistics Finland and analysed in three classes: low (basic education), intermediate (high school or vocational school), and high (university degree or other tertiary degree).

We defined comorbidities as follows: hypertension, ICD-10 codes I10–I15.9, ICD-8 and -9 codes 400–40499; diabetes mellitus, ICD-10 codes E10–E14.9, ICD-8 and -9 codes 250–25099; ischaemic heart disease, ICD-10 codes I20–I25.9, ICD-8 and -9 codes 410–41499; cerebrovascular disease, ICD-10 codes I60–I69.9, ICD-8 and -9 codes 430–43899; Parkinson's disease, ICD-10 code G20, ICD-8 and -9 codes 332, 3320, 3320A, 34200. Additionally, we retrieved information from prescription medication reimbursement entitlements for the treatment of hypertension, diabetes mellitus, ischaemic heart disease, and Parkinson's disease (no reimbursement entitlements were granted for cerebrovascular disease during the study).

A subsample of the study was invited to respond to mailed questionnaires (N = 114 835), and 92 727 of them responded to at least one questionnaire. Information on smoking status and alcohol drinking was retrieved from the earliest available self-report during the study from June 1997 to November 2013 and was available for 86 021 participants on smoking and 86 435 participants on alcohol drinking. To avoid immortal time bias, in the analyses adjusted for these variables (eTable 4 on p. 23 of this appendix), dementia follow-up commenced from the day of the self-report for the participants whose self-report occurred after baseline. Smoking status was analysed in three categories (never smokers, ex-smokers, current smokers). The participants reported the number of different types of alcoholic drinks they consumed within a week. These reports were summed up to the total amount of alcoholic drinks consumed per week, with one drink estimated to contain approximately 10 grams of pure alcohol, and further categorized to four categories:<sup>6</sup> non-drinkers, moderate drinkers (women consuming 1–14 drinks per week and men consuming 1–21 drinks per week), intermediate drinkers (women consuming 15–20 drinks per week and men consuming 22–27 drinks per week), and heavy drinkers (women consuming 21 drinks per week or more and men consuming 28 drinks per week or more).

#### *Ascertainment of incident dementia*

We compiled dementia diagnoses from hospital discharge information, prescription medication reimbursement entitlements, and causes of death. Medication reimbursement entitlements were granted for the treatment of Alzheimer's disease and Parkinson's disease dementia and required verification of the diagnosis with clinical neurological examination, cognitive testing, clinical follow up, and, in the case of Alzheimer's disease, computed tomography or magnetic resonance imaging. Inpatient discharge information from hospitals and health center wards was available from 1 January 1980 to 31 December 2016, causes of death from 1 January 1980 to 31 December 2016, medication reimbursement entitlements for the treatment of dementia from February 1999 to 31 December 2011, and outpatient hospital visits (including outpatient clinic, emergency room, and day ward visits) from 1 January 2012 to 31 December 2016. The date of incident dementia was defined as the first occurrence of dementia diagnosis, whether primary or secondary, in any of these information sources. A diagnosis of all-cause dementia consisted of ICD-10 codes F00-F03, F05.1, G30, G31.0, G31.1, G31.8, and the corresponding ICD-8 (29000-29019, 34791, 34792) and ICD-9 (290, 2900A, 2941A, 3310A, 3311A, 3312X, 4378A) codes in the Finnish national editions of the International Classification of Diseases. We also considered subtypes of dementia; Alzheimer's disease (F00, G30, 29010, 3310A) versus other types of dementia further divided into frontotemporal dementia (G31.0, F02.0, 29011, 34791, 3311A), Parkinson's disease dementia (F02.3), vascular

dementia (F01, 4378A), other specified dementia (G31.8, F02.1, F02.2, F02.4, F02.8), and unspecified dementia (F03, G31.1, F05.1, F02.39, 29000, 29019, 290, 2900A, 2941A, 34792, 3312X).

### **The Health and Social Support study (HeSSup)**

The Health and Social Support study is a prospective cohort study representative of the Finnish population.<sup>8</sup> A random sample from the Finnish Population Information System, stratified by sex and age group (20–24, 30–34, 40–44, and 50–54 years), was invited to respond a mailed questionnaire in 1998 (N = 64 797). This study comprises 24 057 respondents who returned the questionnaire and provided informed consent for register linkage. They were linked to national registries of hospital discharge information (dates and diagnoses recorded by the Finnish Institute for Health and Welfare) and medication reimbursement entitlements (dates and indications recorded by the Finnish Social Insurance Institution) using the personal identification codes unique to each Finnish citizen. The participants were also linked to records on dates and causes of death from Statistics Finland. The Turku University Central Hospital Ethics Committee approved the study.

#### *Diagnoses of hospital-treated diseases (index diseases)*

We retrieved both primary and secondary diagnoses of hospital-treated diseases from inpatient hospital discharge information available from 1 January 1998 to 31 December 2012 (with occasional information available from 4 August 1997 to 31 December 1997). We used the International Classification of Diseases, 10th Revision (ICD-10). All available data were coded according to ICD-10.

#### *Covariates*

Participants' birth year and sex were retrieved from the Finnish Population Information System. Information on education was retrieved from self-reports and was analysed in three classes: low (basic education), intermediate (apprenticeship, vocational school, or college degree), and high (university or polytechnic degree). Self-reported smoking status was analysed in three categories (never smokers, ex-smokers, current smokers). The participants reported the number of different types of alcoholic drinks they consumed within a week. These reports were summed up to the total amount of alcoholic drinks consumed per week, with one drink estimated to contain approximately 10 grams of pure alcohol, and further categorized to four categories:<sup>6</sup> non-drinkers, moderate drinkers (women consuming 1–14 drinks per week and men consuming 1–21 drinks per week), intermediate drinkers (women consuming 15–20 drinks per week and men consuming 22–27 drinks per week), and heavy drinkers (women consuming 21 drinks per week or more and men consuming 28 drinks per week or more).

We defined comorbidities as follows: hypertension, ICD-10 codes I10–I15.9; diabetes mellitus, ICD-10 codes E10–E14.9; ischaemic heart disease, ICD-10 codes I20–I25.9; cerebrovascular disease, ICD-10 codes I60–I69.9; Parkinson's disease, ICD-10 code G20. All available data were coded according to ICD-10. Additionally, we considered prescription medication reimbursement entitlements for the treatment of hypertension, diabetes mellitus, ischaemic heart disease, and Parkinson's disease (no reimbursement entitlements were granted for cerebrovascular disease during the study).

#### *Ascertainment of incident dementia*

We compiled dementia diagnoses from inpatient hospital discharge information, reimbursed prescription medication purchases, and causes of death. Medication reimbursement entitlements were granted for the treatment of Alzheimer's disease and Parkinson's disease dementia and required verification of the diagnosis with clinical neurological examination, cognitive testing, clinical follow up, and, in the case of Alzheimer's disease, computed tomography or magnetic resonance imaging. Inpatient discharge information from hospitals and health center wards was available from 1 January 1998 to 31 December 2012 (with occasional information available from 4 August 1997 to 31 December 1997), causes of death from cohort entry (1 January 1998) to 31 December 2012, and medication reimbursement entitlements for the treatment of dementia from February 1999 to 31 December 2012. The date of incident dementia was defined as the first occurrence of dementia diagnosis, whether primary or secondary, in any of these information sources. A diagnosis of all-cause dementia consisted of ICD-10 codes F00–F03, F05.1, G30, G31.0, G31.1, and G31.8. We also considered subtypes of dementia; Alzheimer's disease (F00, G30) versus other types of dementia further divided into frontotemporal dementia (G31.0, F02.0), Parkinson's disease dementia (F02.3), vascular dementia (F01), other specified dementia (G31.8, F02.1, F02.2, F02.4, F02.8), and unspecified dementia (F03, G31.1, F05.1, F02.39). All available data were coded according to ICD-10.

### **The Still Working study (STW)**

The Still Working study is an ongoing prospective cohort study.<sup>9</sup> In 1986, all employees of Enso Gutzeit (a large forest industry company, which nowadays is part of Stora Enso) in Finland were invited to respond to a mailed questionnaire (N = 12 173). 9276 of them were available for this study and were linked to national registries of hospital discharge information (dates and diagnoses recorded by the Finnish

Institute for Health and Welfare) and medication reimbursement entitlements (dates and indications recorded by the Finnish Social Insurance Institution) using the personal identification codes unique to each Finnish citizen. Participants were also linked to records on dates and causes of death from Statistics Finland. The ethics committee of the Finnish Institute of Occupational Health approved the study.

#### *Diagnoses of hospital-treated diseases (index diseases)*

We retrieved both primary and secondary diagnoses of hospital-treated diseases from inpatient hospital discharge information from 1971 to 31 December 2016, using the International Classification of Diseases, 10th Revision (ICD-10). The diagnosis codes from the 8th and 9th revisions (ICD-8 and ICD-9) were converted into the corresponding ICD-10 codes according to the national editions of the International Classification of Diseases (eTable 1 in this Supplement).<sup>2-4</sup>

#### *Covariates*

Participants' birth year and sex were retrieved from the Finnish Population Information System. Information on occupational grade, smoking status, and alcohol drinking was retrieved from self-reports. Occupational grade was analysed in three categories (low, intermediate, high). Self-reported smoking status was analysed in three categories (never smokers, ex-smokers, current smokers). Based on self-reports on the frequency of alcohol use and whether the amount of alcohol used led to any symptoms, three categories of alcohol consumption were formed: non-drinkers, moderate drinkers, and heavy drinkers.

We defined comorbidities as follows: hypertension, ICD-10 codes I10–I15.9, ICD-8 and -9 codes 400–40499; diabetes mellitus, ICD-10 codes E10–E14.9, ICD-8 and -9 codes 250–25099; ischaemic heart disease, ICD-10 codes I20–I25.9, ICD-8 and -9 codes 410–41499; cerebrovascular disease, ICD-10 codes I60–I69.9, ICD-8 and -9 codes 430–43899; Parkinson's disease, ICD-10 code G20, ICD-8 and -9 codes 332, 3320, 3320A, and 34200. Additionally, we considered prescription medication reimbursement entitlements for the treatment of hypertension, diabetes mellitus, ischaemic heart disease, and Parkinson's disease (no reimbursement entitlements were granted for cerebrovascular disease during the study).

#### *Ascertainment of incident dementia*

We compiled dementia diagnoses from hospital discharge information, reimbursed prescription medication purchases, and causes of death. Medication reimbursement entitlements were granted for the treatment of Alzheimer's disease and Parkinson's disease dementia and required verification of the diagnosis with clinical neurological examination, cognitive testing, clinical follow up, and, in the case of Alzheimer's disease, computed tomography or magnetic resonance imaging. Inpatient discharge information from hospitals and health center wards was available from 1971 to 31 December 2016, causes of death from study entry (1 March 1986) to 31 December 2016, medication reimbursement entitlements for the treatment of dementia from February 1999 to 31 December 2016, and outpatient hospital visits (including outpatient clinic, emergency room, and day ward visits) from 1 January 2009 to 31 December 2016. The date of incident dementia was defined as the first occurrence of dementia diagnosis, whether primary or secondary, in any of these information sources. A diagnosis of all-cause dementia consisted of ICD-10 codes F00–F03, F05.1, G30, G31.0, G31.1, G31.8, and the corresponding ICD-8 (29000–29019, 34791, 34792) and ICD-9 (290, 2900A, 2941A, 3310A, 3311A, 3312X, 4378A) codes in the Finnish national editions of the International Classification of Diseases. We also considered subtypes of dementia; Alzheimer's disease (F00, G30, 29010, 3310A) versus other types of dementia further divided into frontotemporal dementia (G31.0, F02.0, 29011, 34791, 3311A), Parkinson's disease dementia (F02.3), vascular dementia (F01, 4378A), other specified dementia (G31.8, F02.1, F02.2, F02.4, F02.8), and unspecified dementia (F03, G31.1, F05.1, F02.39, 29000, 29019, 290, 2900A, 2941A, 34792, 3312X).

#### **UK Biobank**

UK Biobank is an ongoing prospective cohort study (<https://www.ukbiobank.ac.uk/>). In 2006–2010, 500 000 participants aged 40–69 years were recruited from the United Kingdom. The data collection has involved measures, blood, urine and saliva samples, and questionnaires. The participants have agreed to have their health followed. The UK Biobank study has been approved by the North West Multi-centre Research Ethics Committee (MREC). It has also been approved by the Patient Information Advisory Group (PIAG) in England and Wales and the Community Health Index Advisory Group (CHIAG) in Scotland.

#### *Diagnoses of hospital-treated diseases (index diseases)*

We retrieved both primary and secondary diagnoses of hospital-treated diseases from linked hospital admission data from HES APC (Hospital Episode Statistics–Admitted Patient Care [England]), SMR01 (Scottish Morbidity Records–General/Acute Inpatient and Day Case Admissions [Scotland]) and PEDW (Patient Episode Database for Wales), using the International Classification of Diseases, 10th Revision (ICD-10).



## *Covariates*

Covariates included participants' birth year and sex, education, smoking status, alcohol drinking, body mass index and apolipoprotein E genotype. Body mass index was measured at baseline and the other covariates were based on self-reports. Education was analysed in three categories (low, intermediate, high). Smoking status was also analysed in three categories (never smokers, ex-smokers, current smokers). Alcohol consumption was self-reported using the question "About how often do you drink alcohol?", and the categories for alcohol drinking were non-drinkers, moderate drinkers (one to three times a month or once or twice a week), intermediate drinkers (three or four times a week), and heavy drinkers (daily or almost daily). Apolipoprotein E genotype (0, 1 or 2  $\epsilon$ 4 alleles) was derived from single-nucleotide polymorphism in rs429358 and rs7412 that were genotyped using Affymetrix UK BiLEVE Axiom and Affymetrix UK Biobank Axiom® arrays (<https://www.ukbiobank.ac.uk/scientists-3/genetic-data/>).

Diabetes mellitus was defined by self-report or hospitalisation for it (ICD-10 codes E10–E14 as primary or secondary diagnosis). Hypertension was defined by measurement at baseline (systolic blood pressure  $\geq$ 140mmHg) or hospitalisation for it (ICD-10 codes I10–I15 as primary or secondary diagnosis). Ischaemic heart disease was defined by ICD-10 codes I20–I25.9 and ICD-8 and -9 codes 410–414.99. Cerebrovascular disease was defined by ICD-10 codes I60–I69.9 and ICD-8 and -9 codes 430–438.99. Parkinson's disease was defined by the UK Biobank algorithm ([http://biobank.ndph.ox.ac.uk/showcase/showcase/docs/alg\\_outcome\\_pdp.pdf](http://biobank.ndph.ox.ac.uk/showcase/showcase/docs/alg_outcome_pdp.pdf)) that uses information from hospital records, death records, and self-reports.

## *Ascertainment of incident dementia*

We defined all-cause dementia, Alzheimer's disease, vascular dementia, and frontotemporal dementia according to the UK Biobank algorithm ([http://biobank.ndph.ox.ac.uk/showcase/showcase/docs/alg\\_outcome\\_dementia.pdf](http://biobank.ndph.ox.ac.uk/showcase/showcase/docs/alg_outcome_dementia.pdf)) that uses information from hospital records, death records, and self-reports. For Parkinson's disease dementia (F02.3) and other specified dementia (G31.8, F02.1, F02.2, F02.4, F02.8), we used diagnoses from hospital admission records as no algorithm was available. Unspecified dementia comprised F03, G31.1, F05.1, F02.39, and algorithm-based all-cause dementia without specified cause. The date of incident dementia was defined as the first occurrence of dementia diagnosis.

**eTable 1. Characteristics of participants at baseline by cohort in the primary analysis (Finnish multicohort sample)**

| Demographic                                                    | No. (%)              |                        |                   |                  |
|----------------------------------------------------------------|----------------------|------------------------|-------------------|------------------|
|                                                                | Cohort               |                        |                   |                  |
|                                                                | FPS<br>(N = 227 673) | HeSSup<br>(N = 23 541) | STW<br>(N = 9276) |                  |
| Age at entry, years                                            |                      |                        |                   |                  |
|                                                                | 18-39                | 139 566 (61.3%)        | 9955 (42.3%)      | 3940 (42.5%)     |
|                                                                | 40-49                | 40 549 (17.8%)         | 5064 (21.5%)      | 2608 (28.1%)     |
|                                                                | 50-59                | 27 483 (12.1%)         | 5592 (23.8%)      | 1602 (17.3%)     |
|                                                                | 60-87                | 20 075 (8.8%)          | 2930 (12.4%)      | 1126 (12.1%)     |
| Sex                                                            | Women                | 166 956 (73.3%)        | 13 912 (59.1%)    | 2108 (22.7%)     |
| Socioeconomic status                                           | Low                  | 26 320 (11.6%)         | 7121 (30.2%)      | 6437 (69.4%)     |
|                                                                | Intermediate         | 74 538 (32.7%)         | 12 544 (53.3%)    | 2176 (23.5%)     |
|                                                                | High                 | 126 815 (55.7%)        | 3876 (16.5%)      | 663 (7.1%)       |
| Hypertension                                                   | Yes                  | 12904 (5.7%)           | 1854 (7.9%)       | 943 (10.2%)      |
| Diabetes mellitus                                              | Yes                  | 4707 (2.1%)            | 643 (2.7%)        | 319 (3.4%)       |
| Ischaemic heart disease                                        | Yes                  | 2874 (1.3%)            | 381 (1.6%)        | 443 (4.8%)       |
| Cerebrovascular disease                                        | Yes                  | 1741 (0.8%)            | 167 (0.7%)        | 219 (2.4%)       |
| Parkinson's disease                                            | Yes                  | 176 (0.1%)             | 18 (0.1%)         | 31 (0.3%)        |
| Smoking status                                                 | Never smoker         | 55203 (24.2%)          | 9769 (41.5%)      | 3214 (34.6%)     |
|                                                                | Ex-smoker            | 15315 (6.7%)           | 7684 (32.6%)      | 2917 (31.4%)     |
|                                                                | Current smoker       | 15503 (6.8%)           | 5996 (25.5%)      | 3023 (32.6%)     |
|                                                                | (not available)      | 141652 (62.2%)         | 92 (0.4%)         | 122 (1.3%)       |
| Alcohol drinking                                               | Non-drinker          | 12783 (5.6%)           | 3754 (15.9%)      | 446 (4.8%)       |
|                                                                | Moderate             | 65313 (28.7%)          | 17428 (74.0%)     | 8247 (88.9%)     |
|                                                                | Intermediate         | 3300 (1.4%)            | 1094 (4.6%)       | 0 (0.0%)         |
|                                                                | Heavy                | 5039 (2.2%)            | 1233 (5.2%)       | 434 (4.7%)       |
|                                                                | (not available)      | 141238 (62.0%)         | 32 (0.1%)         | 149 (1.6%)       |
| Follow up, median (interquartile range), years                 |                      | 16.0 (11.5-21.0)       | 7.6 (2.8-12.6)    | 30.8 (18.0-30.8) |
| Dementia by the end of follow up                               | Yes                  | 2161 (0.9%)            | 49 (0.2%)         | 558 (6.0%)       |
| Age at dementia diagnosis, median (interquartile range), years |                      | 72.2 (66.0-77.3)       | 63.4 (56.9-65.3)  | 75.4 (71.8-79.1) |

Abbreviations: FPS, Finnish Public Sector study; HeSSup, Health and Social Support study; STW, Still Working study.

**eTable 2. Characteristics of participants at baseline in the replication cohort (UK Biobank)**

| <b>Demographic</b>                                             | <b>No. (%)</b><br><b>UK Biobank</b><br><b>(N = 485 708)</b> |
|----------------------------------------------------------------|-------------------------------------------------------------|
| Age at entry, years                                            |                                                             |
|                                                                | 18-39 2 (0.0%)                                              |
|                                                                | 40-49 88 472 (18.2%)                                        |
|                                                                | 50-59 146 442 (30.2%)                                       |
|                                                                | 60-73 250 792 (51.6%)                                       |
| Sex                                                            | Women 264 682 (54.5%)                                       |
| Socioeconomic status                                           | Low 83 984 (17.3%)                                          |
|                                                                | Intermediate 242 727 (50.0%)                                |
|                                                                | High 158 997 (32.7%)                                        |
| Hypertension                                                   | Yes 220 708 (45.4%)                                         |
| Diabetes mellitus                                              | Yes 28 924 (6.0%)                                           |
| Ischaemic heart disease                                        | Yes 26 802 (5.5%)                                           |
| Cerebrovascular disease                                        | Yes 8732 (1.8%)                                             |
| Parkinson's disease                                            | Yes 1238 (0.3%)                                             |
| Smoking status                                                 | Never smoker 265 246 (54.6%)                                |
|                                                                | Ex-smoker 167 746 (34.5%)                                   |
|                                                                | Current smoker 50 953 (10.5%)                               |
|                                                                | (not available) 1763 (0.4%)                                 |
| Alcohol drinking                                               | Non-drinker 94 443 (19.4%)                                  |
|                                                                | Moderate 179 459 (36.9%)                                    |
|                                                                | Intermediate 112 350 (23.1%)                                |
|                                                                | Heavy 99 003 (20.4%)                                        |
|                                                                | (not available) 453 (0.1%)                                  |
| Body mass index (kg/m <sup>2</sup> )                           | ≤24.9 160 106 (33.0%)                                       |
|                                                                | 25.0-29.9 205 243 (42.3%)                                   |
|                                                                | ≥30.0 117 825 (24.3%)                                       |
|                                                                | (not available) 2534 (0.5%)                                 |
| Apolipoprotein E genotype (number of ε4 alleles)               | 0 351 642 (72.4%)                                           |
|                                                                | 1 111 749 (23.0%)                                           |
|                                                                | 2 11 252 (2.3%)                                             |
|                                                                | (not available) 11 065 (2.3%)                               |
| Follow up, median (interquartile range), years                 | 7.7 (4.0-8.9)                                               |
| Dementia by the end of follow up                               | Yes 2132 (0.4%)                                             |
| Age at dementia diagnosis, median (interquartile range), years | 72.0 (68.2-74.8)                                            |

## **eMethods 2. Proportionality of hazards**

We examined the proportional hazards assumption in the Cox models with scaled Schoenfeld residuals. These tests indicated a violation of the proportional hazards assumption for nine groups of infectious diseases ( $p < 0.05$ ): any infectious disease, invasive bacterial infections, extracellular bacterial infections, intracellular bacterial infections, Gram-negative bacterial infections, any viral infection, herpesvirus infections, other potentially persistent viral infections, and extra-CNS infections. We assessed these diseases plotting exponentiated scaled Schoenfeld residuals using symmetric nearest neighbour smoothing (eFigure 2 on pages 13-15 of this Supplement).<sup>1</sup> The exponentiated scaled Schoenfeld residuals can be interpreted as hazard ratios and therefore visualise that the hazard ratios were reasonably stable between ages 65 and 80 when most incident dementia cases occurred in our data.<sup>1</sup>

## Supplementary references

1. Royston P, Lambert PC. *Flexible Parametric Survival Analysis Using Stata: Beyond the Cox Model*. College Station, TX: Stata Press; 2011.
2. Lääkintöhallitus. *Classificatio Morborum et Causarum Mortis: Tauti- Ja Kuolinsyyluokitus [Classification of Diseases and Causes of Death]*. Helsinki: Lääkintöhallitus; 1969. <http://urn.fi/URN:NBN:fi-fe201710058910>.
3. Lääkintöhallitus. *Tautiluokitus 1987 : Osa 1 : Systemaattinen Osa [Classification of Diseases 1987: Part 1: Systematic Part]*. Helsinki: Lääkintöhallitus; 1986. <http://urn.fi/URN:NBN:fi-fe201701261356>.
4. Terveyden ja hyvinvoinnin laitos (THL). *Tautiluokitus ICD-10 [Classification of Diseases ICD-10]*. 3rd ed. Helsinki: Terveyden ja hyvinvoinnin laitos (THL); 2011. <http://urn.fi/URN:NBN:fi-fe201205085423>.
5. Kivimäki M, Lawlor DA, Davey Smith G, et al. Socioeconomic position, co-occurrence of behavior-related risk factors, and coronary heart disease: the Finnish Public Sector study. *Am J Public Health*. 2007;97(5):874-879. doi:10.2105/AJPH.2005.078691
6. Heikkilä K, Nyberg ST, Fransson EI, et al. Job strain and alcohol intake: a collaborative meta-analysis of individual-participant data from 140,000 men and women. *PLoS ONE*. 2012;7(7):e40101. doi:10.1371/journal.pone.0040101
7. Lévesque LE, Hanley JA, Kezouh A, Suissa S. Problem of immortal time bias in cohort studies: example using statins for preventing progression of diabetes. *BMJ*. 2010;340:b5087. doi:10.1136/bmj.b5087
8. Korkeila K, Suominen S, Ahvenainen J, et al. Non-response and related factors in a nation-wide health survey. *Eur J Epidemiol*. 2001;17(11):991-999.
9. Väänänen A, Murray M, Koskinen A, Vahtera J, Kouvonen A, Kivimäki M. Engagement in cultural activities and cause-specific mortality: prospective cohort study. *Prev Med*. 2009;49(2-3):142-147. doi:10.1016/j.ypmed.2009.06.026

**eFigure 2. Visualisation of hazard ratios over time using exponentiated scaled Schoenfeld residuals in the primary cohort (Finnish multicohort sample)**

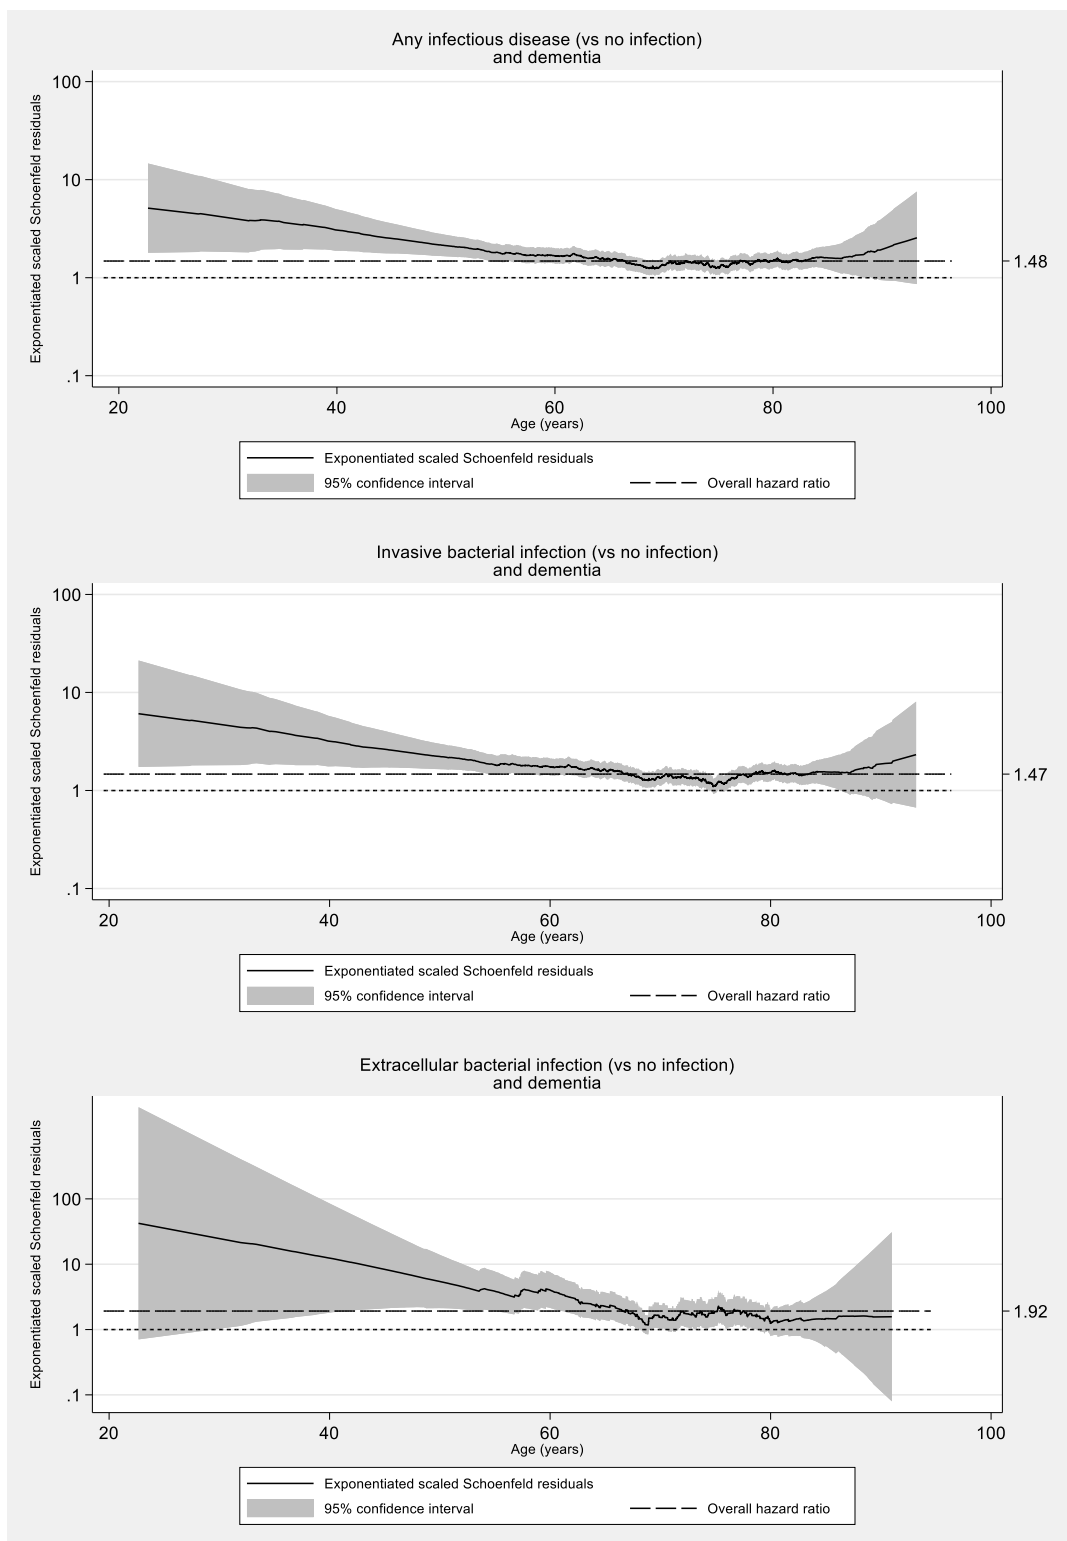

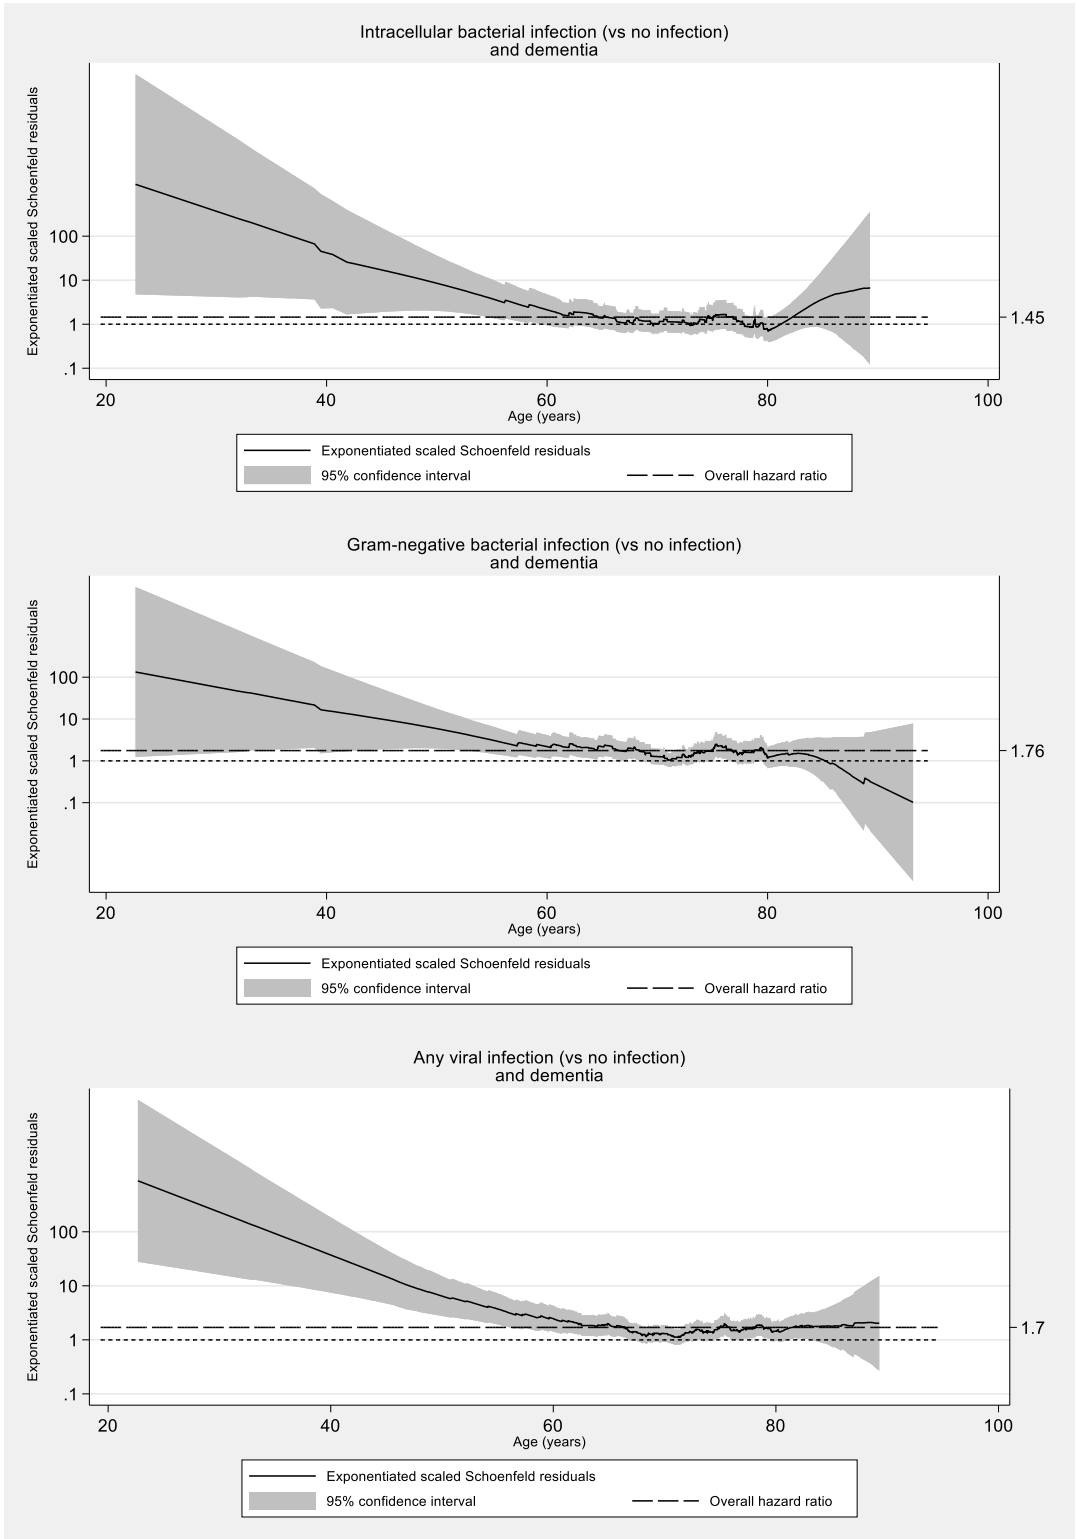

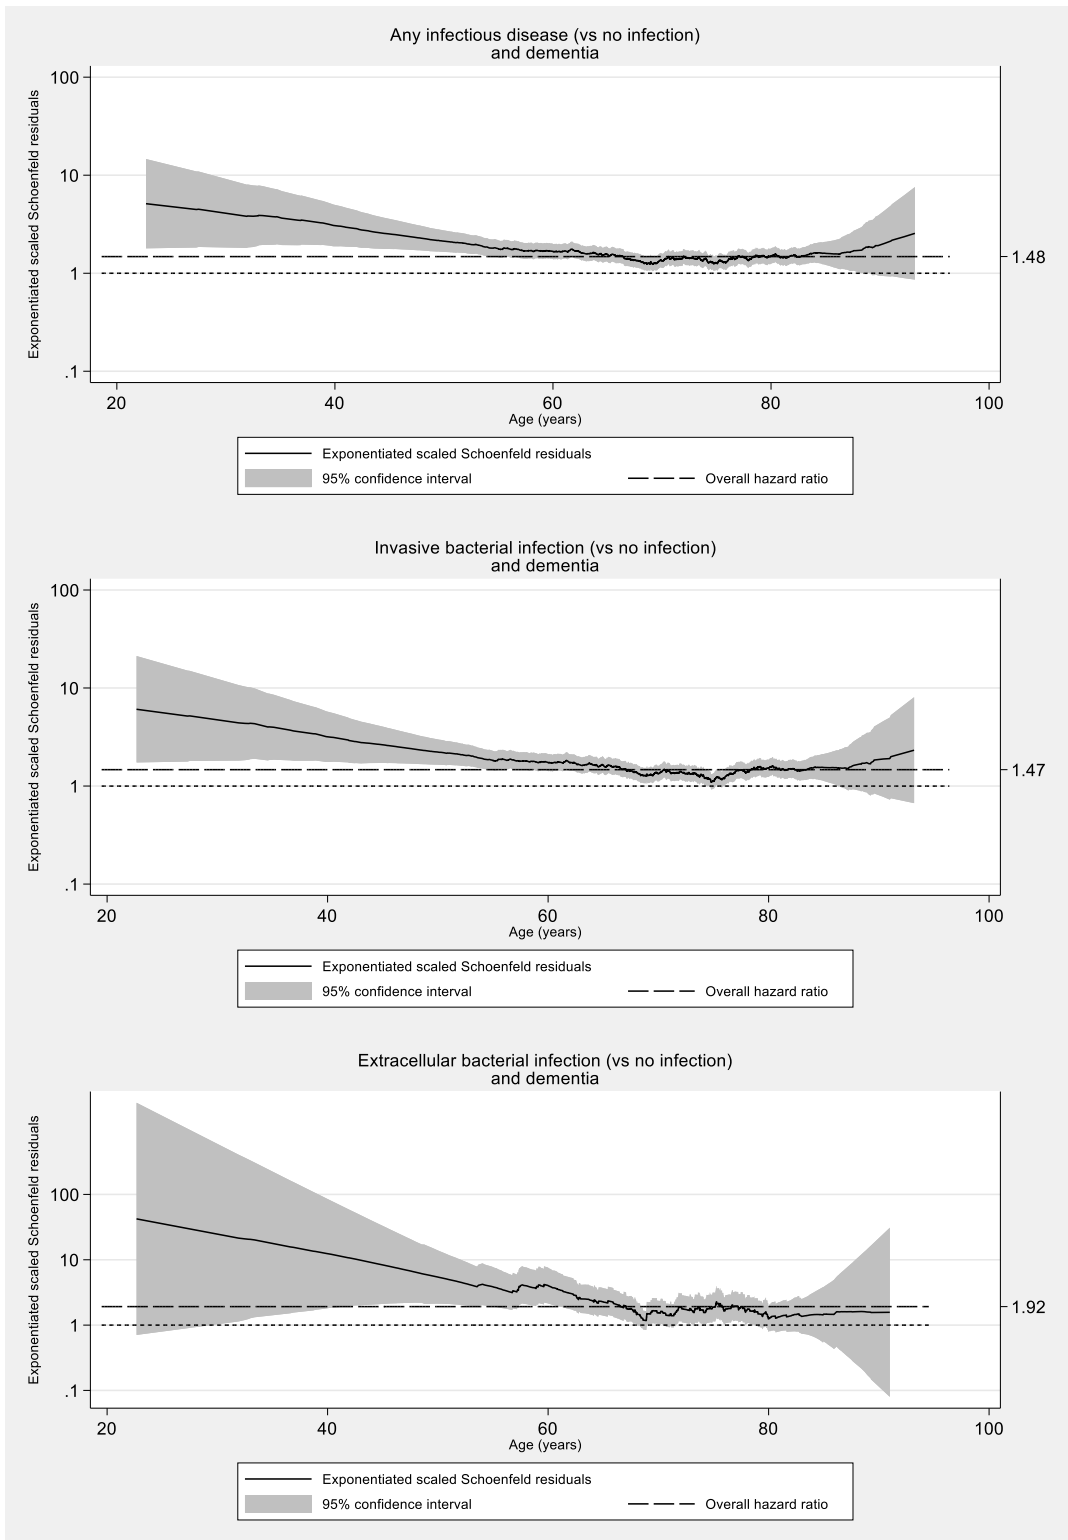

The plots are drawn using symmetric nearest-neighbor smoothing of the scaled Schoenfeld residuals, which can be interpreted as hazard ratios.<sup>1</sup>



eFigure 3. Distribution of age at dementia diagnosis in the primary cohort (Finnish multicohort sample)

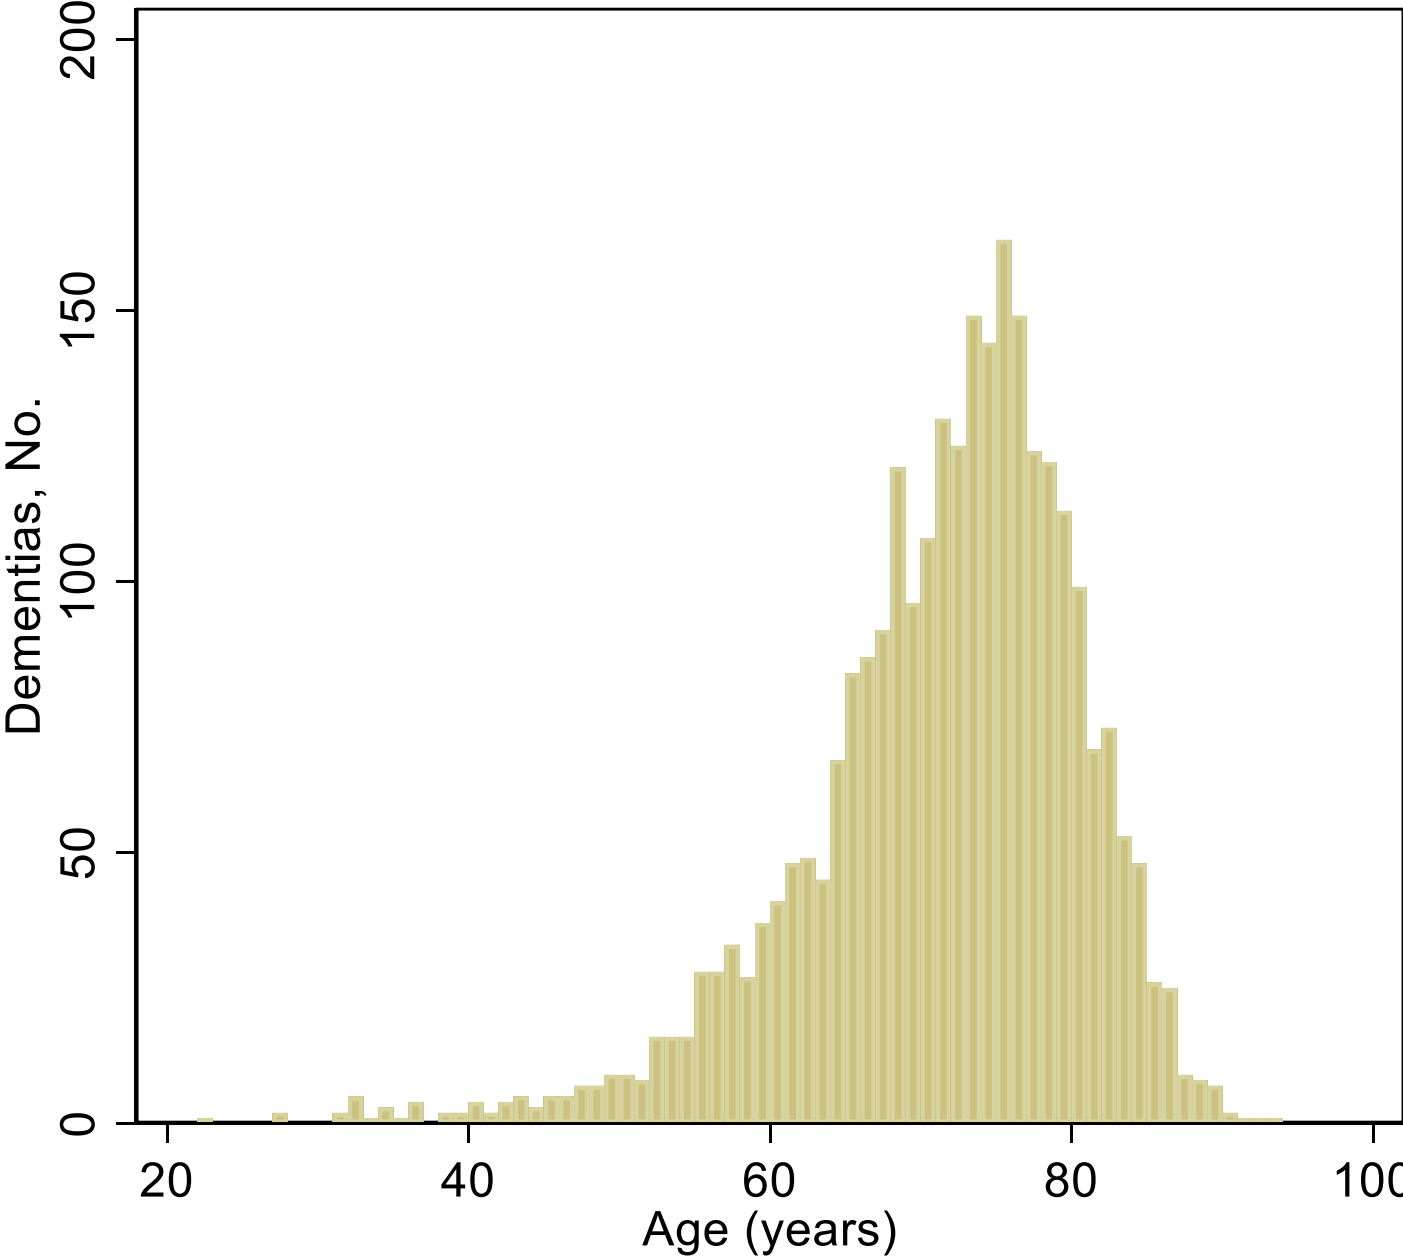

**eFigure 4. Nelson-Aalen cumulative hazard estimate for the association of any hospital-treated infectious disease with dementia in the primary cohort (Finnish multicohort sample)**

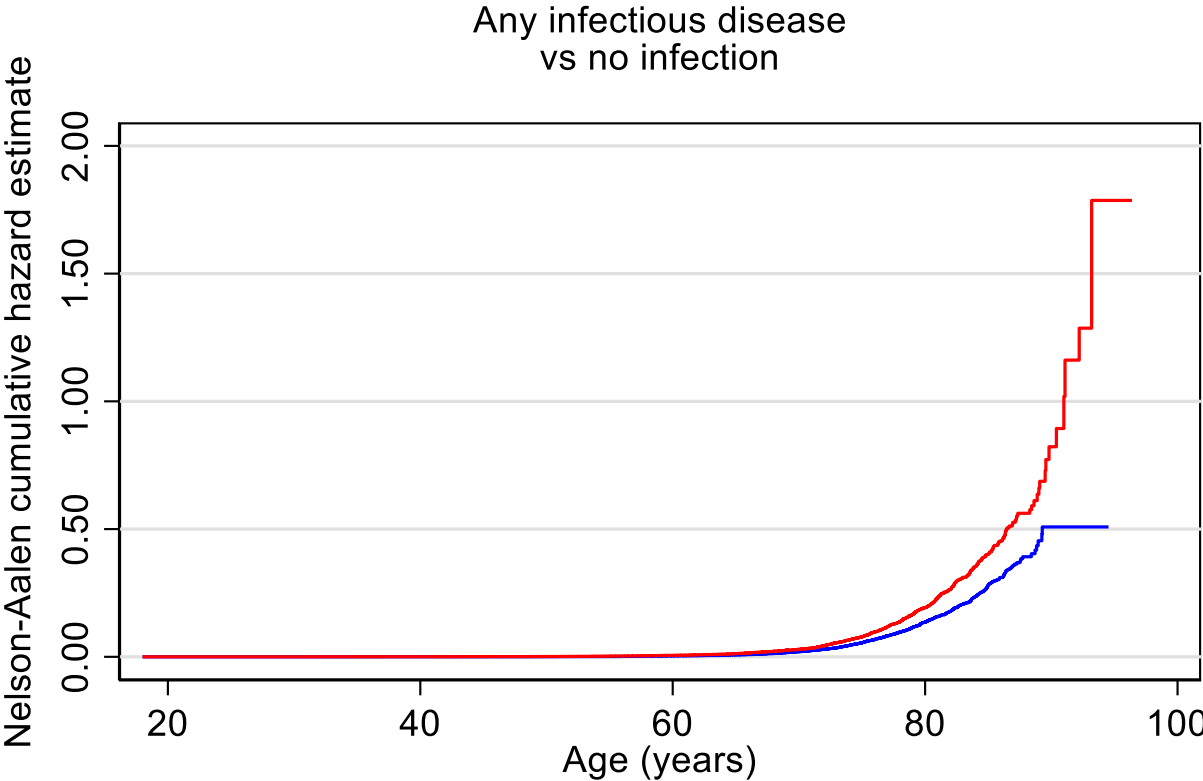

N at risk (dementias)

|              |      |      |       |       |       |        |      |       |   |
|--------------|------|------|-------|-------|-------|--------|------|-------|---|
| No infection | 7586 | (10) | 78100 | (165) | 47088 | (1382) | 2971 | (231) | 0 |
| Infection    | 3830 | (13) | 31933 | (104) | 14401 | (672)  | 1267 | (191) | 0 |

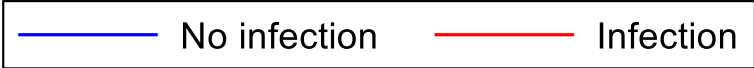

**eTable 3. N (total), N (dementia), and age-standardised dementia incidence rate for the groups with vs without hospital-treated infectious diseases in the primary cohort (Finnish multicohort sample)**

| Infection at baseline                                    | Dementia follow-up                                                                  | Participants with infection |                |                                                                | Reference group (no infection) |                |                                                                |
|----------------------------------------------------------|-------------------------------------------------------------------------------------|-----------------------------|----------------|----------------------------------------------------------------|--------------------------------|----------------|----------------------------------------------------------------|
|                                                          |                                                                                     | Total n                     | Dementia cases | Age-standardised dementia incidence (per 100 000 person-years) | Total n                        | Dementia cases | Age-standardised dementia incidence (per 100 000 person-years) |
| <b>Any infectious disease vs no infection</b>            | <b>Full follow-up</b>                                                               | 77108                       | 980            | 95.35                                                          | 183382                         | 1788           | 62.81                                                          |
| <b>Bacterial infections</b>                              |                                                                                     |                             |                |                                                                |                                |                |                                                                |
| Any bacterial infection vs no infection                  |                                                                                     | 68979                       | 908            | 96.97                                                          | 183382                         | 1788           | 62.81                                                          |
| <b>By severity</b>                                       |                                                                                     |                             |                |                                                                |                                |                |                                                                |
| Potentially invasive bacterial infection vs no infection |                                                                                     | 50938                       | 727            | 95.50                                                          | 183382                         | 1788           | 62.81                                                          |
| Localised bacterial infection vs no infection            |                                                                                     | 26601                       | 344            | 127.29                                                         | 183382                         | 1788           | 62.81                                                          |
| Bacterial infection with sepsis vs no infection          |                                                                                     | 2920                        | 56             | 123.47                                                         | 183382                         | 1788           | 62.81                                                          |
| Bacterial infection without sepsis vs no infection       |                                                                                     | 68152                       | 893            | 97.10                                                          | 183382                         | 1788           | 62.81                                                          |
| <b>By location</b>                                       |                                                                                     |                             |                |                                                                |                                |                |                                                                |
| Extracellular bacterial infection vs no infection        |                                                                                     | 4855                        | 74             | 127.59                                                         | 183382                         | 1788           | 62.81                                                          |
| Intracellular bacterial infection vs no infection        |                                                                                     | 2146                        | 39             | 97.57                                                          | 183382                         | 1788           | 62.81                                                          |
| <b>By Gram stain</b>                                     |                                                                                     |                             |                |                                                                |                                |                |                                                                |
| Gram-positive bacterial infection vs no infection        |                                                                                     | 3961                        | 58             | 129.83                                                         | 183382                         | 1788           | 62.81                                                          |
| Gram-negative bacterial infection vs no infection        |                                                                                     | 3178                        | 56             | 115.50                                                         | 183382                         | 1788           | 62.81                                                          |
| <b>Viral infections</b>                                  |                                                                                     |                             |                |                                                                |                                |                |                                                                |
| Any viral infection vs no infection                      |                                                                                     | 11335                       | 99             | 103.80                                                         | 183382                         | 1788           | 62.81                                                          |
| <b>By type of viral infection</b>                        |                                                                                     |                             |                |                                                                |                                |                |                                                                |
| Herpesvirus (persistent) infection vs no infection       |                                                                                     | 2767                        | 24             | 123.34                                                         | 183382                         | 1788           | 62.81                                                          |
| Other persistent viral infection vs no infection         |                                                                                     | 1663                        | 15             | 135.30                                                         | 183382                         | 1788           | 62.81                                                          |
| Acute viral infection vs no infection                    |                                                                                     | 7329                        | 62             | 92.34                                                          | 183382                         | 1788           | 62.81                                                          |
| <b>Any infectious disease vs no infection</b>            | <b>From year 10 onwards (infection at least 10 years before dementia diagnosis)</b> | 56375                       | 435            | 76.08                                                          | 139891                         | 1257           | 62.69                                                          |
| <b>Bacterial infections</b>                              |                                                                                     |                             |                |                                                                |                                |                |                                                                |
| Any bacterial infection vs no infection                  |                                                                                     | 48973                       | 391            | 77.05                                                          | 139891                         | 1257           | 62.69                                                          |
| <b>By severity</b>                                       |                                                                                     |                             |                |                                                                |                                |                |                                                                |
| Potentially invasive bacterial infection vs no infection |                                                                                     | 33561                       | 317            | 77.69                                                          | 139891                         | 1257           | 62.69                                                          |
| Localised bacterial infection vs no infection            |                                                                                     | 19791                       | 104            | 78.34                                                          | 139891                         | 1257           | 62.69                                                          |
| Bacterial infection with sepsis vs no infection          |                                                                                     | 826                         | 16             | 124.19                                                         | 139891                         | 1257           | 62.69                                                          |
| Bacterial infection without sepsis vs no infection       |                                                                                     | 48610                       | 382            | 76.25                                                          | 139891                         | 1257           | 62.69                                                          |
| <b>By location</b>                                       |                                                                                     |                             |                |                                                                |                                |                |                                                                |
| Extracellular bacterial infection vs no infection        |                                                                                     | 2894                        | 25             | 105.12                                                         | 139891                         | 1257           | 62.69                                                          |
| Intracellular bacterial infection vs no infection        |                                                                                     | 1605                        | 24             | 87.22                                                          | 139891                         | 1257           | 62.69                                                          |
| <b>By Gram stain</b>                                     |                                                                                     |                             |                |                                                                |                                |                |                                                                |
| Gram-positive bacterial infection vs no infection        |                                                                                     | 2280                        | 15             | 88.18                                                          | 139891                         | 1257           | 62.69                                                          |
| Gram-negative bacterial infection vs no infection        |                                                                                     | 1851                        | 26             | 114.00                                                         | 139891                         | 1257           | 62.69                                                          |
| <b>Viral infections</b>                                  |                                                                                     |                             |                |                                                                |                                |                |                                                                |
| Any viral infection vs no infection                      |                                                                                     | 9058                        | 45             | 78.12                                                          | 139891                         | 1257           | 62.69                                                          |
| <b>By type of viral infection</b>                        |                                                                                     |                             |                |                                                                |                                |                |                                                                |
| Herpesvirus (persistent) infection vs no infection       |                                                                                     | 2292                        | 14             | 129.52                                                         | 139891                         | 1257           | 62.69                                                          |
| Other persistent viral infection vs no infection         |                                                                                     | 1309                        | 9              | 116.57                                                         | 139891                         | 1257           | 62.69                                                          |
| Acute viral infection vs no infection                    |                                                                                     | 5741                        | 24             | 61.39                                                          | 139891                         | 1257           | 62.69                                                          |

The incidence rates are standardised according to the age structure of the reference group in full follow-up.

**eFigure 5. Risk of dementia associated with the most common Gram-positive and Gram-negative infections in the primary cohort (Finnish multicohort sample)**

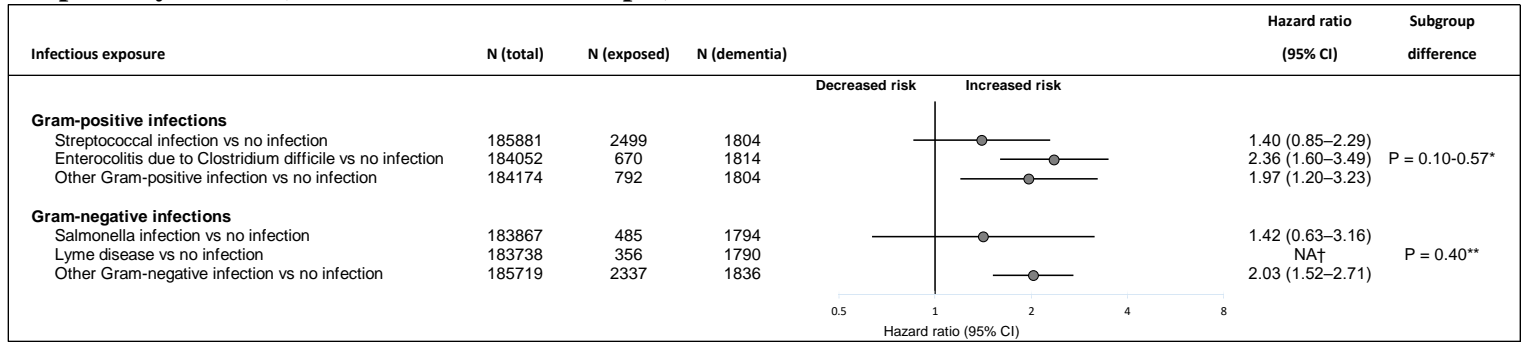

CI, confidence interval. Hazard ratios are adjusted for sex and socioeconomic status, and age is the time scale.

† The number of dementia cases in those with Lyme disease was less than 5.

\* P = 0.10 for difference in the association of streptococcal and Clostridium difficile infections with dementia, 0.34 for difference in the association of streptococcal and other Gram-positive infections with dementia, and 0.57 for difference in the association of Clostridium difficile and other Gram-positive infections with dementia

\*\* Difference in the association of salmonella vs other Gram-negative infections with dementia.

Streptococcal infections comprise ICD-10 codes A38, A40, A49.1, B95.0, B95.1, B95.2, B95.3, B95.4, B95.5, G00.1, G00.2, J02.0, J03.0, J13, J15.3, J15.4, J20.2, M00.1, M00.2, P23.3, P36.0, P36.1.

Enterocolitis due to Clostridium difficile was defined using ICD-10 code A04.7.

Other Gram-positive infections comprise all other Gram-positive infections listed in the appendix (pp. 89-91 and 241-242).

Salmonella infections comprise ICD-10 codes A01 and A02.

Lyme disease comprise ICD-10 codes A69.2 and M01.2.

Other Gram-negative infections comprise all other Gram-negative infections listed in the appendix (pp. 91-95 and 242-245).

**eFigure 6. Risk of dementia associated with herpes simplex virus 1 or 2 infection, other herpesvirus infection, and any mild herpesvirus infection in the primary cohort (Finnish multicohort sample)**

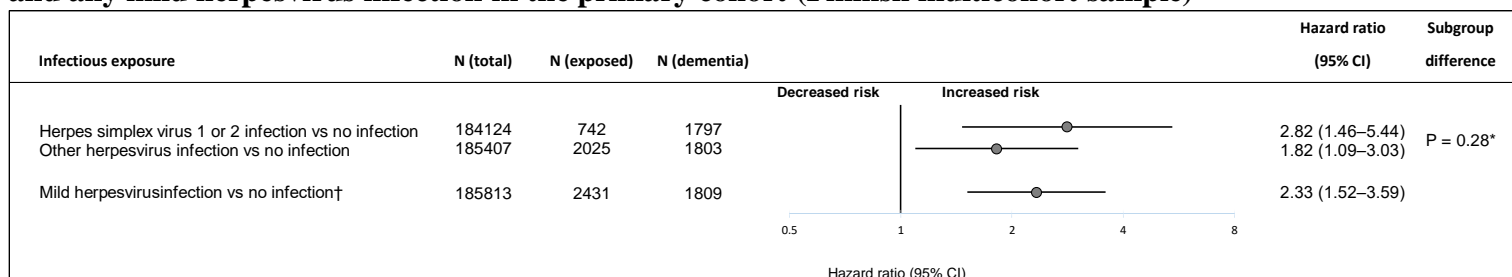

CI, confidence interval. Hazard ratios are adjusted for sex and socioeconomic status, and age is the time scale.

\* Difference between herpes simplex virus infections and other herpesviral infections

† Mild herpesvirus infections comprise all herpesvirus infections except those considered severe (eczema herpeticum [B00.0], herpesviral meningitis [B00.3, B01.0, B02.1], encephalitis [B00.4, B01.1, B02.0], and pneumonia [B01.2], disseminated herpesviral disease [B00.7, B02.7], herpesviral infection with other complications [B01.8, B02.8], Kaposi sarcoma [B21.0, C46], and congenital herpesviral infection [P35.1, P35.2]).

Herpes simplex virus 1 and 2 infections comprise ICD-10 codes A60, B00, H19.1, P35.2.

Other herpesvirus infections comprise all other herpesvirus infections listed in the appendix (pp. 159-160 and 248).

**eFigure 7. Competing-risk models for the risk of dementia associated with any hospital-treated infectious disease, bacterial infections, and viral infections in the primary cohort (Finnish multicohort sample)**

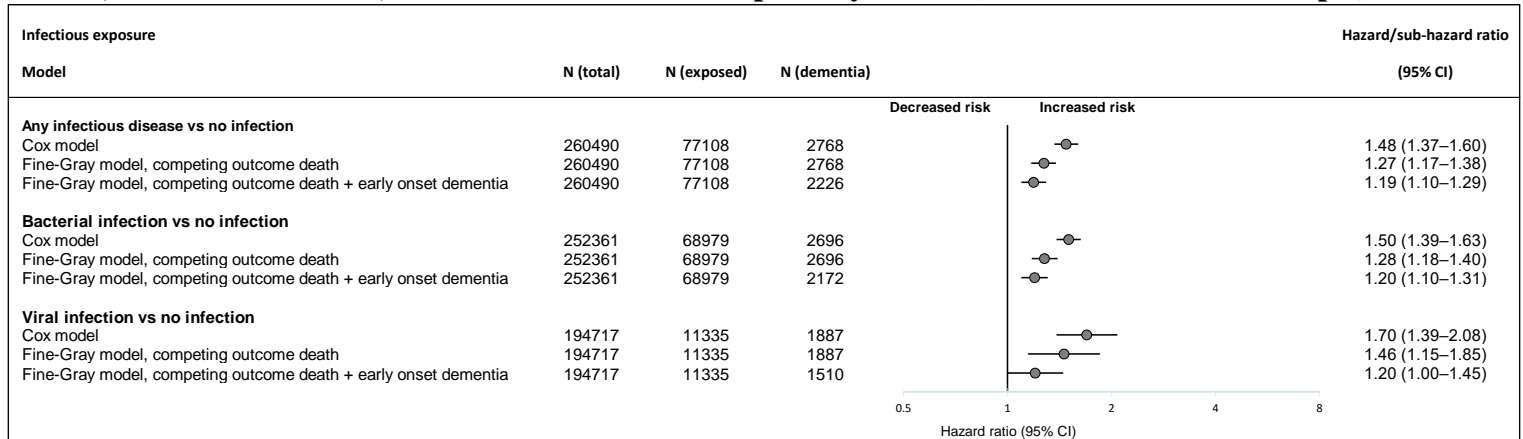

CI, confidence interval. The Cox models are adjusted for age (as the time scale), sex, and socioeconomic status and additionally stratified for cohort using cohort-specific baseline hazards and cohort-specific adjustment terms for covariates. The Fine-Gray models are adjusted for age (as the time scale), sex, socioeconomic status, and cohort and use cohort-specific adjustment terms for covariates and robust standard errors clustered for cohort. Dementia cases that occurred before age 65 were considered early onset.

**eFigure 8. Risk of Alzheimer's disease (AD) and non-AD dementia associated with any hospital-treated infectious disease and with specific bacterial and viral infections in the primary cohort (Finnish multicohort sample)**

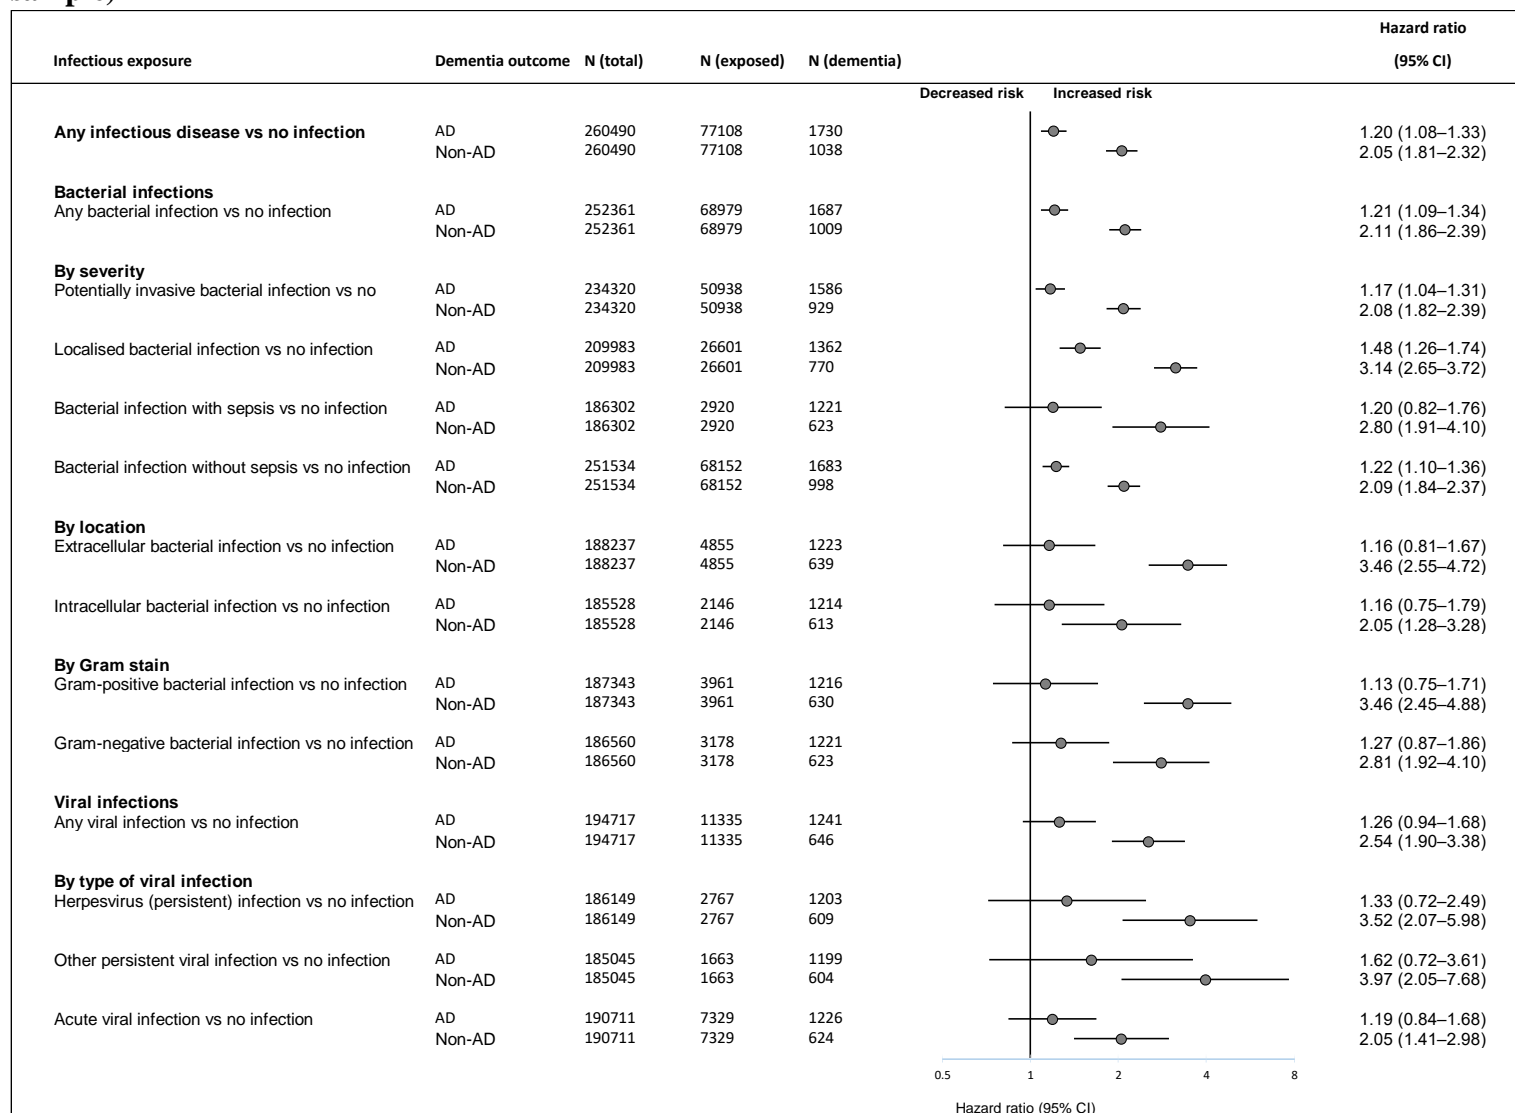

CI, confidence interval; AD, Alzheimer's disease dementia; Non-AD, other dementia. Hazard ratios are adjusted for sex and socioeconomic status, and age is the time scale.

**eTable 4. Risk of dementia associated with any hospital-treated infectious disease in relation to follow ups, types of dementia, adjustments, and exclusions of participant groups in the primary and replication cohorts (Finnish multicohort sample and UK Biobank)**

| Disease                                                                 | Primary cohort (Finnish multicohort sample) |                |                                |                |                          | Replication cohort (UK Biobank) |                |                                |                |                          |
|-------------------------------------------------------------------------|---------------------------------------------|----------------|--------------------------------|----------------|--------------------------|---------------------------------|----------------|--------------------------------|----------------|--------------------------|
|                                                                         | Participants with infection                 |                | Reference group (no infection) |                | Hazard ratio<br>(95% CI) | Participants with infection     |                | Reference group (no infection) |                | Hazard ratio<br>(95% CI) |
|                                                                         | Total n                                     | Dementia cases | Total n                        | Dementia cases |                          | Total n                         | Dementia cases | Total n                        | Dementia cases |                          |
| <b>Any infectious disease (vs no infection)</b>                         |                                             |                |                                |                |                          |                                 |                |                                |                |                          |
| All participants                                                        | 77108                                       | 980            | 183382                         | 1788           | 1.48 (1.37-1.60)         | 94112                           | 894            | 391596                         | 1238           | 2.60 (2.38-2.83)         |
| Early onset dementia (onset before age 65)                              | 71490                                       | 198            | 176091                         | 344            | 1.76 (1.48-2.10)         | 58681                           | 131            | 276965                         | 159            | 3.70 (2.93-4.68)         |
| Late-onset dementia (onset at or after age 65)                          | 16303                                       | 782            | 43267                          | 1444           | 1.42 (1.30-1.55)         | 59302                           | 763            | 220661                         | 1079           | 2.46 (2.24-2.70)         |
| Alzheimer's disease                                                     | 77108                                       | 537            | 183382                         | 1193           | 1.20 (1.08-1.33)         | 94112                           | 209            | 391596                         | 418            | 1.80 (1.53-2.13)         |
| Vascular dementia                                                       | 77108                                       | 94             | 183382                         | 115            | 2.09 (1.59-2.75)         | 94112                           | 171            | 391596                         | 181            | 3.28 (2.65-4.04)         |
| Frontotemporal dementia                                                 | 77108                                       | 33             | 183382                         | 69             | 1.38 (0.91-2.09)         | 94112                           | 21             | 391596                         | 45             | 1.92 (1.14-3.24)         |
| Parkinson's disease dementia                                            | 77108                                       | 44             | 183382                         | 70             | 1.75 (1.20-2.56)         | 94112                           | 26             | 391596                         | 33             | 2.81 (1.67-4.72)         |
| Other specified dementia                                                | 77108                                       | 79             | 183382                         | 67             | 3.52 (2.53-4.90)         | 94112                           | 76             | 391596                         | 95             | 3.02 (2.23-4.09)         |
| Unspecified dementia                                                    | 77108                                       | 193            | 183382                         | 274            | 1.94 (1.61-2.33)         | 94112                           | 391            | 391596                         | 466            | 3.00 (2.62-3.44)         |
| Participants with hypertension excluded                                 | 70456                                       | 652            | 174333                         | 1498           | 1.34 (1.22-1.47)         | 43390                           | 254            | 221610                         | 502            | 2.27 (1.95-2.64)         |
| Participants with diabetes excluded                                     | 74017                                       | 856            | 180804                         | 1730           | 1.41 (1.30-1.53)         | 83259                           | 667            | 373525                         | 1117           | 2.33 (2.11-2.56)         |
| Participants with ischaemic heart disease excluded                      | 75067                                       | 831            | 181725                         | 1714           | 1.42 (1.31-1.54)         | 83113                           | 684            | 375793                         | 1079           | 2.56 (2.33-2.82)         |
| Participants with cerebrovascular disease excluded                      | 75813                                       | 886            | 182550                         | 1753           | 1.42 (1.31-1.54)         | 90556                           | 771            | 386420                         | 1173           | 2.44 (2.23-2.68)         |
| Participants with Parkinson's disease excluded                          | 76964                                       | 957            | 183301                         | 1769           | 1.47 (1.35-1.59)         | 93501                           | 810            | 390969                         | 1169           | 2.51 (2.29-2.74)         |
| Additionally adjusted for period effect                                 | 77108                                       | 980            | 183382                         | 1788           | 1.48 (1.37-1.60)         | 94112                           | 894            | 391596                         | 1238           | 2.59 (2.37-2.82)         |
| Data available for heavy drinking                                       | 30084                                       | 325            | 88979                          | 730            | 1.32 (1.16-1.51)         | 93963                           | 892            | 391292                         | 1237           | 2.60 (2.38-2.83)         |
| Additionally adjusted for heavy drinking                                | 30084                                       | 325            | 88979                          | 730            | 1.32 (1.16-1.51)         | 93963                           | 892            | 391292                         | 1237           | 2.51 (2.30-2.73)         |
| Data available for smoking                                              | 29930                                       | 321            | 88687                          | 729            | 1.31 (1.15-1.50)         | 93607                           | 885            | 390338                         | 1233           | 2.59 (2.37-2.82)         |
| Additionally adjusted for smoking                                       | 29930                                       | 321            | 88687                          | 729            | 1.31 (1.14-1.49)         | 93607                           | 885            | 390338                         | 1233           | 2.55 (2.33-2.78)         |
| Data available for body mass index                                      | --                                          | --             | --                             | --             | --                       | 93136                           | 871            | 390038                         | 1227           | 2.57 (2.35-2.80)         |
| Additionally adjusted for body mass index                               | --                                          | --             | --                             | --             | --                       | 93136                           | 871            | 390038                         | 1227           | 2.58 (2.36-2.81)         |
| Data available for heavy drinking, smoking, and body mass index         | --                                          | --             | --                             | --             | --                       | 92531                           | 860            | 388564                         | 1221           | 2.55 (2.34-2.79)         |
| Additionally adjusted for heavy drinking, smoking, and body mass index. | --                                          | --             | --                             | --             | --                       | 92531                           | 860            | 388564                         | 1221           | 2.44 (2.23-2.66)         |

CI, confidence interval. Hazard ratios are adjusted for sex and socioeconomic status, and additionally for period effect (year of birth), heavy drinking, smoking, or body mass index when stated so. Age is the time scale.

All hazard ratios are from the full follow-up.

Exclusions were done to those with comorbidities (hypertension, diabetes, ischaemic heart disease, cerebrovascular disease, or Parkinson's disease) at baseline.



**eFigure 9. Risk of dementia associated with chronicity and predisposition of the infection towards entering the central nervous system (CNS) in the primary cohort (Finnish multicohort sample)**

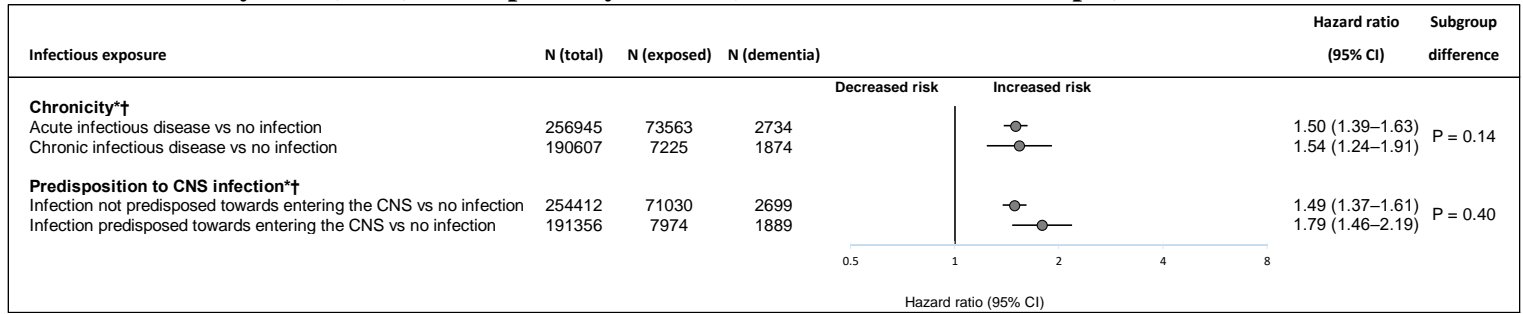

CI, confidence interval. CNS, central nervous system. Hazard ratios are adjusted for sex and socioeconomic status, and age is the time scale.

\* Hazard ratios for incident dementia diagnosed at least 10 years after the infection: 1.23 (95% CI 1.10 to 1.37) for acute and 1.33 (95% CI 0.99 to 1.78) for chronic infections; 1.22 (95% CI 1.09 to 1.37) for infections not predisposed to affect the CNS and 1.33 (95% CI 0.99 to 1.78) for infections predisposed to affect the CNS.

† The three most common infections were: acute appendicitis (n = 12 007), unspecified pneumonia (n = 6204), other gastroenteritis and colitis of infectious and unspecified origin (n = 5703) for acute infections; anogenital warts (n = 1061), gammaherpesviral mononucleosis (n = 547), chronic periodontitis (n = 469) for chronic infections;

Gammaherpesviral mononucleosis (n = 545), unspecified infectious mononucleosis (n = 425), pneumonia due to streptococcus pneumonia (n = 402) for infections predisposed to affect the CNS; and acute appendicitis (n = 12 102), unspecified pneumonia (n = 6364), other gastroenteritis and colitis of infectious and unspecified origin (n = 5789) for infections not predisposed to affect the CNS.

The numbers reported differ slightly between categories of infections because some participants had multiple diagnoses and only the first diagnosis in each category is reported here.

A full list of the infections and their frequencies is shown in the appendix (pp. 115–152 and 268–298).

**eFigure 10. Selection of participants for time-dependent analysis in the primary analysis (Finnish multicohort sample)**

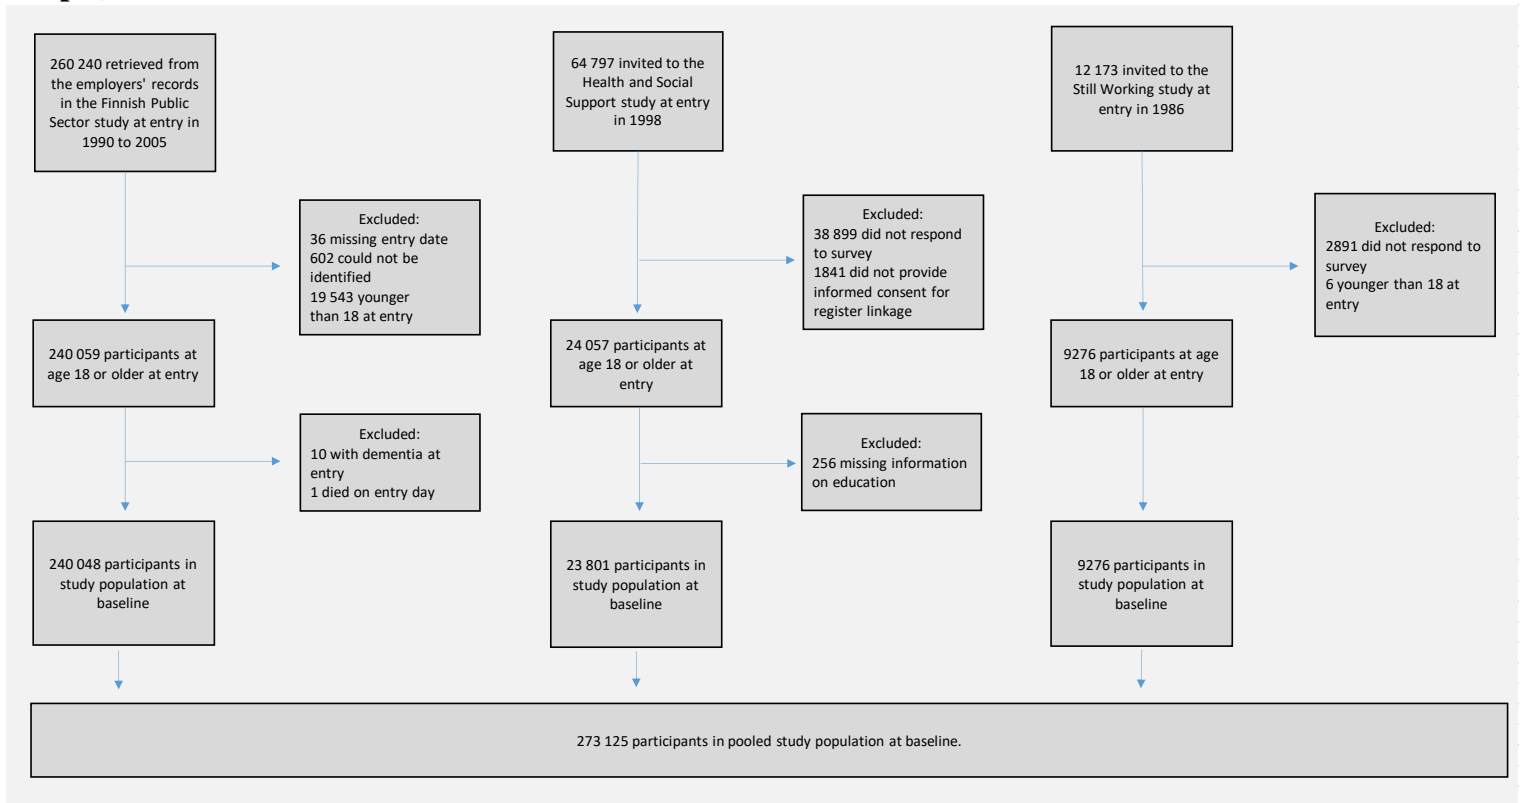

**eFigure 11. Risk of dementia associated with hospital-treated infectious diseases in time-dependent analysis in the full follow up and after 10 or more years from the onset of infection in the primary cohort (Finnish multicohort sample)**

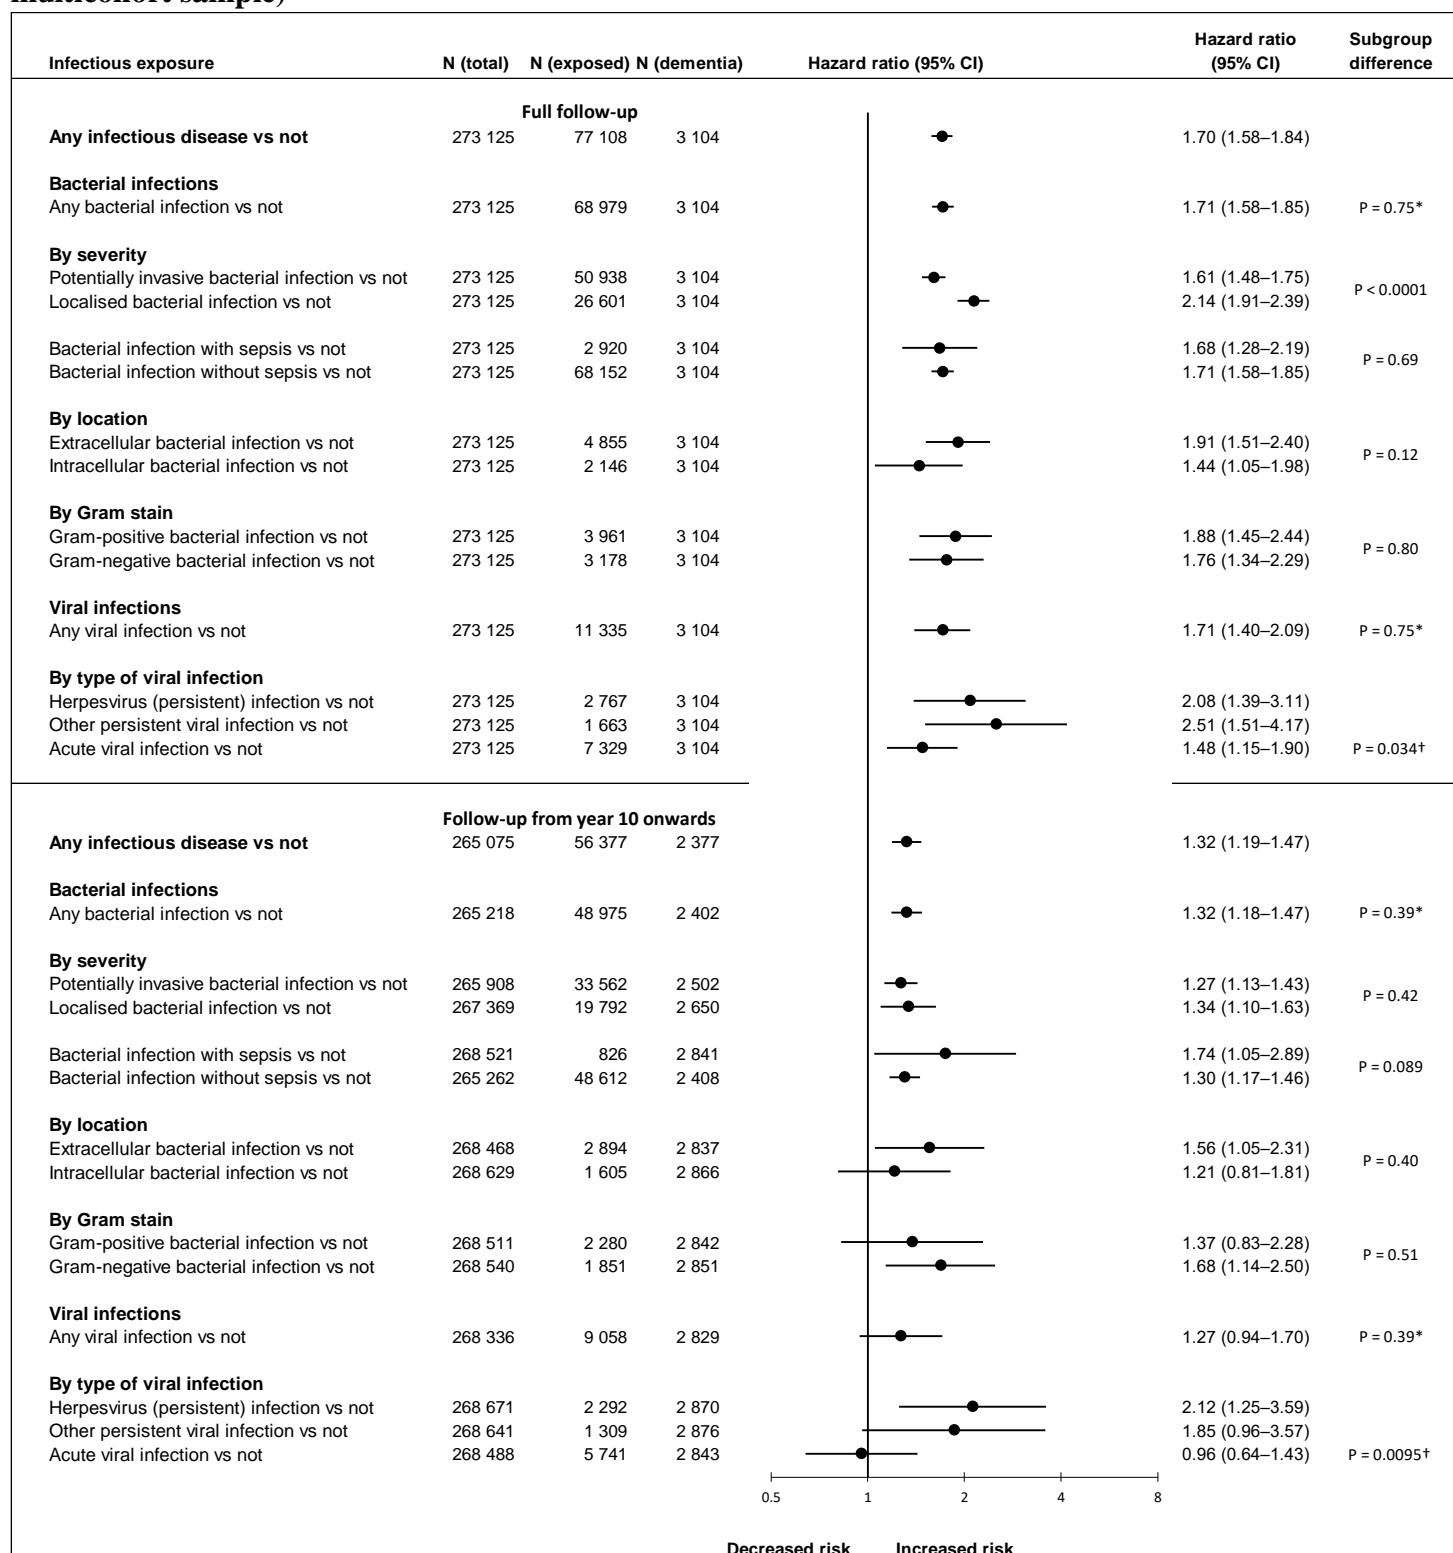

CI, confidence interval. Hazard ratios are adjusted for sex and socioeconomic status, and age is the time scale.

\* Difference in the associations of bacterial and viral infections with dementia

† Difference in the association of acute viral infection and that of herpes and other persistent viral infections with dementia. (For difference in the association of herpesvirus infections and other persistent viral infections with dementia, p = 0.55 in the full follow-up and p = 0.77 from year 10 onwards.)

**eFigure 12. Multivariable-adjusted associations between hospital-treated infections and dementia by dementia type using time-dependent analysis in the replication cohort (UK Biobank)**

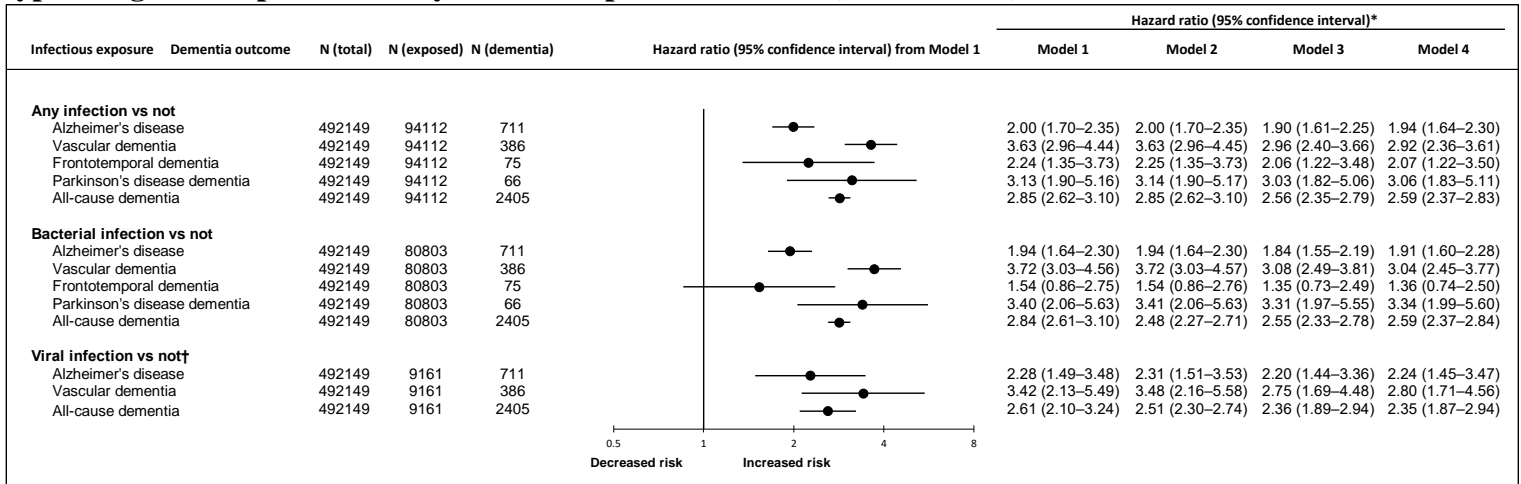

\*MODEL 1: Adjusted for age (as the time scale), sex, and socioeconomic status. Numbers of participants and dementia cases are for this model.

MODEL 2: As model 1 + those with HIV excluded. This model was based on 491 894 participants with complete information of whom 2404 developed incident dementia.

MODEL 3: As model 2 + adjusted for alcohol drinking, smoking, body mass index, hypertension, diabetes. This model was based on 487 187 participants with complete information of whom 2344 developed incident dementia.

MODEL 4: As model 3 + adjusted for apolipoprotein E genotype. This model was based on 476 653 participants with complete information of whom 2284 developed incident dementia.

† The number of dementia cases in those with viral infection was less than 5 for frontotemporal dementia and Parkinson's disease dementia.

**eFigure 13. Risk of dementias associated with infection burden, simultaneous infections, and central nervous system (CNS) vs extra-CNS infections using time-dependent analysis in the primary and replication cohorts (Finnish multicohort sample and UK Biobank)**

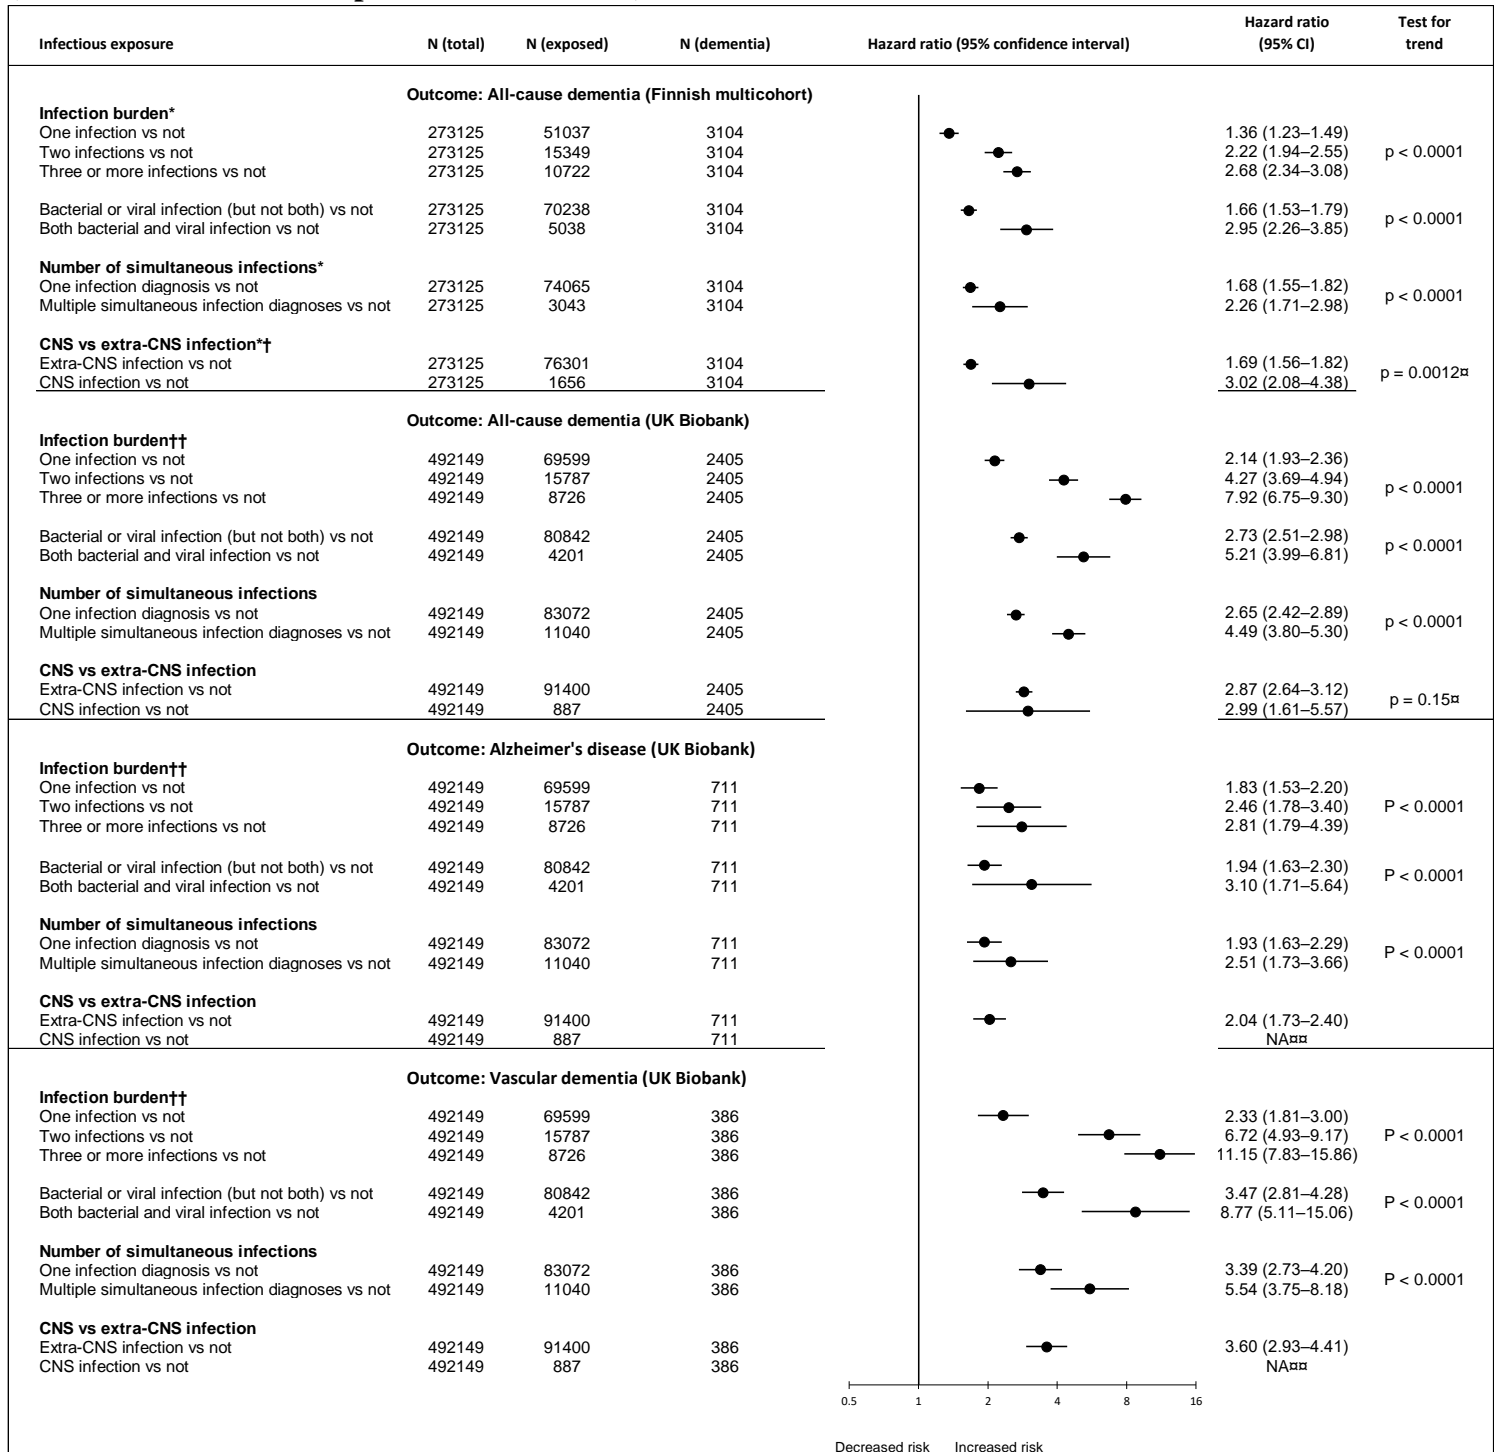

Infections are hospital-treated. CI, confidence interval. CNS, central nervous system. Hazard ratios are adjusted for sex and socioeconomic status, and age is the time scale.

\* Hazard ratios for incident dementia diagnosed at least 10 years after the infection: 1.06 (95% CI 0.92–1.21) for one infection, 1.07 (95% CI 0.77 to 1.49) for two infections, and 1.81 (95% CI 1.35 to 2.43) for three or more infections; 1.30 (95% CI 1.16 to 1.44) for bacterial or viral infection (but not both) and 1.99 (95% CI 1.15 to 3.44) for both bacterial and viral infection;

1.31 (95% CI 1.18 to 1.46) for one diagnosis and 1.56 (95% CI 0.92 to 2.64) for multiple simultaneous infection diagnoses;

1.31 (95% CI 1.18 to 1.45) for extra-CNS and 1.34 (95% CI 0.67 to 2.69) for CNS infections.

† The three most common infections were: unspecified viral meningitis (n = 280), unspecified viral infection of central nervous system (n = 167), and unspecified viral encephalitis (n = 152) for CNS infections; acute appendicitis (n = 11 903), unspecified pneumonia (n = 6088), other gastroenteritis and colitis of infectious and unspecified origin (n = 5639) for extra-CNS infections.

A full list of the infections and their frequencies is shown in the appendix (pp. 255–270).

†† If the participant was hospitalised several times for exactly the same diagnosis, only the first counted towards infection burden because the UK Biobank data included only the first hospitalisation for each diagnosis.

‡ P for subgroup difference

‡‡ Less than five Alzheimer's disease and vascular dementia cases among those exposed to CNS infections.

**eTable 5. Classification of hospital-treated infectious diseases in the study on diagnosis level**

| ICD-10 code                    | ICD-10 name                                                                          |
|--------------------------------|--------------------------------------------------------------------------------------|
| <b>All infectious diseases</b> |                                                                                      |
| A00                            | Cholera                                                                              |
| A00.0                          | Cholera due to <i>Vibrio cholerae</i> 01, biovar cholerae                            |
| A00.1                          | Cholera due to <i>Vibrio cholerae</i> 01, biovar eltor                               |
| A00.9                          | Cholera, unspecified                                                                 |
| A01*                           | Typhoid and paratyphoid fevers                                                       |
| A02                            | Other salmonella infections                                                          |
| A02.0                          | Salmonella enteritis                                                                 |
| A02.1                          | Salmonella sepsis                                                                    |
| A02.2                          | Localized salmonella infections                                                      |
| A02.8                          | Other specified salmonella infections                                                |
| A02.9                          | Salmonella infection, unspecified                                                    |
| A03                            | Shigellosis                                                                          |
| A03.0                          | Shigellosis due to <i>Shigella dysenteriae</i>                                       |
| A03.1                          | Shigellosis due to <i>Shigella flexneri</i>                                          |
| A03.2                          | Shigellosis due to <i>Shigella boydii</i>                                            |
| A03.3                          | Shigellosis due to <i>Shigella sonnei</i>                                            |
| A03.8                          | Other shigellosis                                                                    |
| A03.9                          | Shigellosis, unspecified                                                             |
| A04                            | Other bacterial intestinal infections                                                |
| A04.0                          | Enteropathogenic <i>Escherichia coli</i> infection                                   |
| A04.1                          | Enterotoxigenic <i>Escherichia coli</i> infection                                    |
| A04.2                          | Enteroinvasive <i>Escherichia coli</i> infection                                     |
| A04.3                          | Enterohaemorrhagic <i>Escherichia coli</i> infection                                 |
| A04.4                          | Other intestinal <i>Escherichia coli</i> infections                                  |
| A04.5                          | <i>Campylobacter</i> enteritis                                                       |
| A04.6                          | Enteritis due to <i>Yersinia enterocolitica</i>                                      |
| A04.7                          | Enterocolitis due to <i>Clostridium difficile</i>                                    |
| A04.8                          | Other specified bacterial intestinal infections                                      |
| A04.9                          | Bacterial intestinal infection, unspecified                                          |
| A05                            | Other bacterial foodborne intoxications, not elsewhere classified                    |
| A05.0                          | Foodborne staphylococcal intoxication                                                |
| A05.1                          | Botulism                                                                             |
| A05.2                          | Foodborne <i>Clostridium perfringens</i> [ <i>Clostridium welchii</i> ] intoxication |

|       |                                                                             |
|-------|-----------------------------------------------------------------------------|
| A05.3 | Foodborne <i>Vibrio parahaemolyticus</i> intoxication                       |
| A05.4 | Foodborne <i>Bacillus cereus</i> intoxication                               |
| A05.8 | Other specified bacterial foodborne intoxications                           |
| A05.9 | Bacterial foodborne intoxication, unspecified                               |
| A06   | Amoebiasis                                                                  |
| A06.0 | Acute amoebic dysentery                                                     |
| A06.1 | Chronic intestinal amoebiasis                                               |
| A06.2 | Amoebic nondysenteric colitis                                               |
| A06.3 | Amoeboma of intestine                                                       |
| A06.4 | Amoebic liver abscess                                                       |
| A06.5 | Amoebic lung abscess                                                        |
| A06.6 | Amoebic brain abscess                                                       |
| A06.7 | Cutaneous amoebiasis                                                        |
| A06.8 | Amoebic infection of other sites                                            |
| A06.9 | Amoebiasis, unspecified                                                     |
| A07*  | Other protozoal intestinal diseases                                         |
| A08.0 | Rotaviral enteritis                                                         |
| A08.1 | Acute gastroenteropathy due to Norwalk agent                                |
| A08.2 | Adenoviral enteritis                                                        |
| A08.3 | Other viral enteritis                                                       |
| A08.4 | Viral intestinal infection, unspecified                                     |
| A08.5 | Other specified intestinal infections                                       |
| A09*  | Other gastroenteritis and colitis of infectious and unspecified origin      |
| A15*  | Respiratory tuberculosis, bacteriologically and histologically confirmed    |
| A16*  | Respiratory tuberculosis, not confirmed bacteriologically or histologically |
| A17   | Tuberculosis of nervous system                                              |
| A17.0 | Tuberculous meningitis                                                      |
| A17.1 | Meningeal tuberculoma                                                       |
| A17.8 | Other tuberculosis of nervous system                                        |
| A17.9 | Tuberculosis of nervous system, unspecified                                 |
| A18*  | Tuberculosis of other organs                                                |
| A19*  | Miliary tuberculosis                                                        |
| A20   | Plague                                                                      |
| A20.0 | Bubonic plague                                                              |
| A20.1 | Cellulocutaneous plague                                                     |
| A20.2 | Pneumonic plague                                                            |
| A20.3 | Plague meningitis                                                           |
| A20.7 | Septicaemic plague                                                          |

|       |                                               |
|-------|-----------------------------------------------|
| A20.8 | Other forms of plague                         |
| A20.9 | Plague, unspecified                           |
| A21   | Tularaemia                                    |
| A21.0 | Ulceroglandular tularaemia                    |
| A21.1 | Oculoglandular tularaemia                     |
| A21.2 | Pulmonary tularaemia                          |
| A21.3 | Gastrointestinal tularaemia                   |
| A21.7 | Generalized tularaemia                        |
| A21.8 | Other forms of tularaemia                     |
| A21.9 | Tularaemia, unspecified                       |
| A22   | Anthrax                                       |
| A22.0 | Cutaneous anthrax                             |
| A22.1 | Pulmonary anthrax                             |
| A22.2 | Gastrointestinal anthrax                      |
| A22.7 | Anthrax sepsis                                |
| A22.8 | Other forms of anthrax                        |
| A22.9 | Anthrax, unspecified                          |
| A23   | Brucellosis                                   |
| A23.0 | Brucellosis due to <i>Brucella melitensis</i> |
| A23.1 | Brucellosis due to <i>Brucella abortus</i>    |
| A23.2 | Brucellosis due to <i>Brucella suis</i>       |
| A23.3 | Brucellosis due to <i>Brucella canis</i>      |
| A23.8 | Other brucellosis                             |
| A23.9 | Brucellosis, unspecified                      |
| A24   | Glanders and melioidosis                      |
| A24.0 | Glanders                                      |
| A24.1 | Acute and fulminating melioidosis             |
| A24.2 | Subacute and chronic melioidosis              |
| A24.3 | Other melioidosis                             |
| A25   | Rat-bite fevers                               |
| A25.0 | Spirillosis                                   |
| A25.1 | Streptobacillosis                             |
| A25.9 | Rat-bite fever, unspecified                   |
| A26   | Erysipeloid                                   |
| A26.0 | Cutaneous erysipeloid                         |
| A26.7 | Erysipelothrix sepsis                         |
| A26.8 | Other forms of erysipeloid                    |
| A26.9 | Erysipeloid, unspecified                      |



|       |                                                                       |
|-------|-----------------------------------------------------------------------|
| A27*  | Leptospirosis                                                         |
| A28   | Other zoonotic bacterial diseases, not elsewhere classified           |
| A28.0 | Pasteurellosis                                                        |
| A28.1 | Cat-scratch disease                                                   |
| A28.2 | Extraintestinal yersiniosis                                           |
| A28.8 | Other specified zoonotic bacterial diseases, not elsewhere classified |
| A28.9 | Zoonotic bacterial disease, unspecified                               |
| A30*  | Leprosy [Hansen disease]                                              |
| A31*  | Infection due to other mycobacteria                                   |
| A32   | Listeriosis                                                           |
| A32.0 | Cutaneous listeriosis                                                 |
| A32.1 | Listerial meningitis and meningoencephalitis                          |
| A32.7 | Listerial sepsis                                                      |
| A32.8 | Other forms of listeriosis                                            |
| A32.9 | Listeriosis, unspecified                                              |
| A33*  | Tetanus neonatorum                                                    |
| A34*  | Obstetrical tetanus                                                   |
| A35*  | Other tetanus                                                         |
| A36*  | Diphtheria                                                            |
| A37*  | Whooping cough                                                        |
| A38*  | Scarlet fever                                                         |
| A39   | Meningococcal infection                                               |
| A39.0 | Meningococcal meningitis                                              |
| A39.1 | Waterhouse-Friderichsen syndrome                                      |
| A39.2 | Acute meningococcaemia                                                |
| A39.3 | Chronic meningococcaemia                                              |
| A39.4 | Meningococcaemia, unspecified                                         |
| A39.5 | Meningococcal heart disease                                           |
| A39.8 | Other meningococcal infections                                        |
| A39.9 | Meningococcal infection, unspecified                                  |
| A40   | Streptococcal sepsis                                                  |
| A40.0 | Sepsis due to streptococcus, group A                                  |
| A40.1 | Sepsis due to streptococcus, group B                                  |
| A40.2 | Sepsis due to streptococcus, group D                                  |
| A40.3 | Sepsis due to Streptococcus pneumoniae                                |
| A40.8 | Other streptococcal sepsis                                            |
| A40.9 | Streptococcal sepsis, unspecified                                     |
| A41   | Other sepsis                                                          |

|       |                                                           |
|-------|-----------------------------------------------------------|
| A41.0 | Sepsis due to <i>Staphylococcus aureus</i>                |
| A41.1 | Sepsis due to other specified staphylococcus              |
| A41.2 | Sepsis due to unspecified staphylococcus                  |
| A41.3 | Sepsis due to <i>Haemophilus influenzae</i>               |
| A41.4 | Sepsis due to anaerobes                                   |
| A41.5 | Sepsis due to other Gram-negative organisms               |
| A41.8 | Other specified sepsis                                    |
| A41.9 | Sepsis, unspecified                                       |
| A42   | Actinomycosis                                             |
| A42.0 | Pulmonary actinomycosis                                   |
| A42.1 | Abdominal actinomycosis                                   |
| A42.2 | Cervicofacial actinomycosis                               |
| A42.7 | Actinomycotic sepsis                                      |
| A42.8 | Other forms of actinomycosis                              |
| A42.9 | Actinomycosis, unspecified                                |
| A43   | Nocardiosis                                               |
| A43.0 | Pulmonary nocardiosis                                     |
| A43.1 | Cutaneous nocardiosis                                     |
| A43.8 | Other forms of nocardiosis                                |
| A44   | Bartonellosis                                             |
| A44.0 | Systemic bartonellosis                                    |
| A44.1 | Cutaneous and mucocutaneous bartonellosis                 |
| A44.8 | Other forms of bartonellosis                              |
| A44.9 | Bartonellosis, unspecified                                |
| A46*  | Erysipelas                                                |
| A48.0 | Gas gangrene                                              |
| A48.1 | Legionnaires disease                                      |
| A48.2 | Nonpneumonic Legionnaires disease [Pontiac fever]         |
| A48.3 | Toxic shock syndrome                                      |
| A48.4 | Brazilian purpuric fever                                  |
| A48.8 | Other specified bacterial diseases                        |
| A49   | Bacterial infection of unspecified site                   |
| A49.0 | Staphylococcal infection, unspecified site                |
| A49.1 | Streptococcal infection, unspecified site                 |
| A49.2 | <i>Haemophilus influenzae</i> infection, unspecified site |
| A49.3 | <i>Mycoplasma</i> infection, unspecified site             |
| A49.8 | Other bacterial infections of unspecified site            |
| A49.9 | Bacterial infection, unspecified                          |

|       |                                                                                                   |
|-------|---------------------------------------------------------------------------------------------------|
| A50   | Congenital syphilis                                                                               |
| A50.0 | Early congenital syphilis, symptomatic                                                            |
| A50.1 | Early congenital syphilis, latent                                                                 |
| A50.2 | Early congenital syphilis, unspecified                                                            |
| A50.3 | Late congenital syphilitic oculopathy                                                             |
| A50.4 | Late congenital neurosyphilis [juvenile neurosyphilis]                                            |
| A50.5 | Other late congenital syphilis, symptomatic                                                       |
| A50.6 | Late congenital syphilis, latent                                                                  |
| A50.7 | Late congenital syphilis, unspecified                                                             |
| A50.9 | Congenital syphilis, unspecified                                                                  |
| A51   | Early syphilis                                                                                    |
| A51.0 | Primary genital syphilis                                                                          |
| A51.1 | Primary anal syphilis                                                                             |
| A51.2 | Primary syphilis of other sites                                                                   |
| A51.3 | Secondary syphilis of skin and mucous membranes                                                   |
| A51.4 | Other secondary syphilis                                                                          |
| A51.5 | Early syphilis, latent                                                                            |
| A51.9 | Early syphilis, unspecified                                                                       |
| A52   | Late syphilis                                                                                     |
| A52.0 | Cardiovascular syphilis                                                                           |
| A52.1 | Symptomatic neurosyphilis                                                                         |
| A52.2 | Asymptomatic neurosyphilis                                                                        |
| A52.3 | Neurosyphilis, unspecified                                                                        |
| A52.7 | Other symptomatic late syphilis                                                                   |
| A52.8 | Late syphilis, latent                                                                             |
| A52.9 | Late syphilis, unspecified                                                                        |
| A53*  | Other and unspecified syphilis                                                                    |
| A54   | Gonococcal infection                                                                              |
| A54.0 | Gonococcal infection of lower genitourinary tract without periurethral or accessory gland abscess |
| A54.1 | Gonococcal infection of lower genitourinary tract with periurethral and accessory gland abscess   |
| A54.2 | Gonococcal pelviperitonitis and other gonococcal genitourinary infections                         |
| A54.3 | Gonococcal infection of eye                                                                       |
| A54.4 | Gonococcal infection of musculoskeletal system                                                    |
| A54.5 | Gonococcal pharyngitis                                                                            |
| A54.6 | Gonococcal infection of anus and rectum                                                           |
| A54.8 | Other gonococcal infections                                                                       |
| A54.9 | Gonococcal infection, unspecified                                                                 |
| A55*  | Chlamydial lymphogranuloma (venereum)                                                             |

|       |                                                                        |
|-------|------------------------------------------------------------------------|
| A56.0 | Chlamydial infection of lower genitourinary tract                      |
| A56.1 | Chlamydial infection of pelviperitoneum and other genitourinary organs |
| A56.2 | Chlamydial infection of genitourinary tract, unspecified               |
| A56.3 | Chlamydial infection of anus and rectum                                |
| A56.4 | Chlamydial infection of pharynx                                        |
| A56.8 | Sexually transmitted chlamydial infection of other sites               |
| A57*  | Chancroid                                                              |
| A58*  | Granuloma inguinale                                                    |
| A59*  | Trichomoniasis                                                         |
| A60*  | Anogenital herpesviral [herpes simplex] infection                      |
| A63.0 | Anogenital (venereal) warts                                            |
| A63.8 | Other specified predominantly sexually transmitted diseases            |
| A64*  | Unspecified sexually transmitted disease                               |
| A65*  | Nonvenereal syphilis                                                   |
| A66*  | Yaws                                                                   |
| A67*  | Pinta [carate]                                                         |
| A68*  | Relapsing fevers                                                       |
| A69   | Other spirochaetal infections                                          |
| A69.0 | Necrotizing ulcerative stomatitis                                      |
| A69.1 | Other Vincent infections                                               |
| A69.2 | Lyme disease                                                           |
| A69.8 | Other specified spirochaetal infections                                |
| A69.9 | Spirochaetal infection, unspecified                                    |
| A70*  | Chlamydia psittaci infection                                           |
| A71*  | Trachoma                                                               |
| A74.0 | Chlamydial conjunctivitis                                              |
| A74.8 | Other chlamydial diseases                                              |
| A74.9 | Chlamydial infection, unspecified                                      |
| A75   | Typhus fever                                                           |
| A75.0 | Epidemic louse-borne typhus fever due to Rickettsia prowazekii         |
| A75.1 | Recrudescence typhus [Brill disease]                                   |
| A75.2 | Typhus fever due to Rickettsia typhi                                   |
| A75.3 | Typhus fever due to Rickettsia tsutsugamushi                           |
| A75.9 | Typhus fever, unspecified                                              |
| A77   | Spotted fever [tick-borne rickettsioses]                               |
| A77.0 | Spotted fever due to Rickettsia rickettsii                             |
| A77.1 | Spotted fever due to Rickettsia conorii                                |
| A77.2 | Spotted fever due to Rickettsia sibirica                               |

|       |                                                                            |
|-------|----------------------------------------------------------------------------|
| A77.3 | Spotted fever due to <i>Rickettsia australis</i>                           |
| A77.8 | Other spotted fevers                                                       |
| A77.9 | Spotted fever, unspecified                                                 |
| A78*  | Q fever                                                                    |
| A79   | Other rickettsioses                                                        |
| A79.0 | Trench fever                                                               |
| A79.1 | Rickettsialpox due to <i>Rickettsia akari</i>                              |
| A79.8 | Other specified rickettsioses                                              |
| A79.9 | Rickettsiosis, unspecified                                                 |
| A80*  | Acute poliomyelitis                                                        |
| A81.1 | Subacute sclerosing panencephalitis                                        |
| A81.2 | Progressive multifocal leukoencephalopathy                                 |
| A83*  | Mosquito-borne viral encephalitis                                          |
| A84*  | Tick-borne viral encephalitis                                              |
| A85*  | Other viral encephalitis, not elsewhere classified                         |
| A86*  | Unspecified viral encephalitis                                             |
| A87*  | Viral meningitis                                                           |
| A88*  | Other viral infections of central nervous system, not elsewhere classified |
| A89*  | Unspecified viral infection of central nervous system                      |
| A90*  | Dengue fever [classical dengue]                                            |
| A91*  | Dengue haemorrhagic fever                                                  |
| A92   | Other mosquito-borne viral fevers                                          |
| A92.0 | Chikungunya virus disease                                                  |
| A92.1 | O'nyong-nyong fever                                                        |
| A92.2 | Venezuelan equine fever                                                    |
| A92.3 | West Nile virus infection                                                  |
| A92.4 | Rift Valley fever                                                          |
| A92.8 | Other specified mosquito-borne viral fevers                                |
| A92.9 | Mosquito-borne viral fever, unspecified                                    |
| A93   | Other arthropod-borne viral fevers, not elsewhere classified               |
| A93.0 | Oropouche virus disease                                                    |
| A93.1 | Sandfly fever                                                              |
| A93.2 | Colorado tick fever                                                        |
| A93.8 | Other specified arthropod-borne viral fevers                               |
| A94*  | Unspecified arthropod-borne viral fever                                    |
| A95*  | Yellow fever                                                               |
| A96*  | Arenaviral haemorrhagic fever                                              |
| A97*  | Dengue                                                                     |

|       |                                                           |
|-------|-----------------------------------------------------------|
| A98   | Other viral haemorrhagic fevers, not elsewhere classified |
| A98.0 | Crimean-Congo haemorrhagic fever                          |
| A98.1 | Omsk haemorrhagic fever                                   |
| A98.2 | Kyasanur Forest disease                                   |
| A98.3 | Marburg virus disease                                     |
| A98.4 | Ebola virus disease                                       |
| A98.5 | Haemorrhagic fever with renal syndrome                    |
| A98.8 | Other specified viral haemorrhagic fevers                 |
| A99*  | Unspecified viral haemorrhagic fever                      |
| B00   | Herpesviral [herpes simplex] infections                   |
| B00.0 | Eczema herpeticum                                         |
| B00.1 | Herpesviral vesicular dermatitis                          |
| B00.2 | Herpesviral gingivostomatitis and pharyngotonsillitis     |
| B00.3 | Herpesviral meningitis                                    |
| B00.4 | Herpesviral encephalitis                                  |
| B00.5 | Herpesviral ocular disease                                |
| B00.7 | Disseminated herpesviral disease                          |
| B00.8 | Other forms of herpesviral infection                      |
| B00.9 | Herpesviral infection, unspecified                        |
| B01   | Varicella [chickenpox]                                    |
| B01.0 | Varicella meningitis                                      |
| B01.1 | Varicella encephalitis                                    |
| B01.2 | Varicella pneumonia                                       |
| B01.8 | Varicella with other complications                        |
| B01.9 | Varicella without complication                            |
| B02   | Zoster [herpes zoster]                                    |
| B02.0 | Zoster encephalitis                                       |
| B02.1 | Zoster meningitis                                         |
| B02.2 | Zoster with other nervous system involvement              |
| B02.3 | Zoster ocular disease                                     |
| B02.7 | Disseminated zoster                                       |
| B02.8 | Zoster with other complications                           |
| B02.9 | Zoster without complication                               |
| B04*  | Monkeypox                                                 |
| B05   | Measles                                                   |
| B05.0 | Measles complicated by encephalitis                       |
| B05.1 | Measles complicated by meningitis                         |
| B05.2 | Measles complicated by pneumonia                          |

|       |                                                                                           |
|-------|-------------------------------------------------------------------------------------------|
| B05.3 | Measles complicated by otitis media                                                       |
| B05.4 | Measles with intestinal complications                                                     |
| B05.8 | Measles with other complications                                                          |
| B05.9 | Measles without complication                                                              |
| B06   | Rubella [German measles]                                                                  |
| B06.0 | Rubella with neurological complications                                                   |
| B06.8 | Rubella with other complications                                                          |
| B06.9 | Rubella without complication                                                              |
| B07*  | Viral warts                                                                               |
| B08.0 | Other orthopoxvirus infections                                                            |
| B08.1 | Molluscum contagiosum                                                                     |
| B08.2 | Exanthema subitum [sixth disease]                                                         |
| B08.3 | Erythema infectiosum [fifth disease]                                                      |
| B08.4 | Enteroviral vesicular stomatitis with exanthem                                            |
| B08.5 | Enteroviral vesicular pharyngitis                                                         |
| B08.8 | Other specified viral infections characterized by skin and mucous membrane lesions        |
| B09*  | Unspecified viral infection characterized by skin and mucous membrane lesions             |
| B15   | Acute hepatitis A                                                                         |
| B15.0 | Hepatitis A with hepatic coma                                                             |
| B15.9 | Hepatitis A without hepatic coma                                                          |
| B16   | Acute hepatitis B                                                                         |
| B16.0 | Acute hepatitis B with delta-agent (coinfection) with hepatic coma                        |
| B16.1 | Acute hepatitis B with delta-agent (coinfection) without hepatic coma                     |
| B16.2 | Acute hepatitis B without delta-agent with hepatic coma                                   |
| B16.9 | Acute hepatitis B without delta-agent and without hepatic coma                            |
| B17*  | Other acute viral hepatitis                                                               |
| B18*  | Chronic viral hepatitis                                                                   |
| B19   | Unspecified viral hepatitis                                                               |
| B19.0 | Unspecified viral hepatitis with hepatic coma                                             |
| B19.9 | Unspecified viral hepatitis without hepatic coma                                          |
| B20*  | Human immunodeficiency virus [HIV] disease resulting in infectious and parasitic diseases |
| B21*  | Human immunodeficiency virus [HIV] disease resulting in malignant neoplasms               |
| B21.0 | HIV disease resulting in Kaposi sarcoma                                                   |
| B22   | Human immunodeficiency virus [HIV] disease resulting in other specified diseases          |
| B22.0 | HIV disease resulting in encephalopathy                                                   |
| B22.1 | HIV disease resulting in lymphoid interstitial pneumonitis                                |
| B22.2 | HIV disease resulting in wasting syndrome                                                 |
| B22.7 | HIV disease resulting in multiple diseases classified elsewhere                           |

|       |                                                                          |
|-------|--------------------------------------------------------------------------|
| B23*  | Human immunodeficiency virus [HIV] disease resulting in other conditions |
| B24*  | Unspecified human immunodeficiency virus [HIV] disease                   |
| B25*  | Cytomegaloviral disease                                                  |
| B26   | Mumps                                                                    |
| B26.0 | Mumps orchitis                                                           |
| B26.1 | Mumps meningitis                                                         |
| B26.2 | Mumps encephalitis                                                       |
| B26.3 | Mumps pancreatitis                                                       |
| B26.8 | Mumps with other complications                                           |
| B26.9 | Mumps without complication                                               |
| B27   | Infectious mononucleosis                                                 |
| B27.0 | Gammaherpesviral mononucleosis                                           |
| B27.1 | Cytomegaloviral mononucleosis                                            |
| B27.8 | Other infectious mononucleosis                                           |
| B27.9 | Infectious mononucleosis, unspecified                                    |
| B30*  | Viral conjunctivitis                                                     |
| B33   | Other viral diseases, not elsewhere classified                           |
| B33.0 | Epidemic myalgia                                                         |
| B33.1 | Ross River disease                                                       |
| B33.2 | Viral carditis                                                           |
| B33.3 | Retrovirus infections, not elsewhere classified                          |
| B33.4 | Hantavirus (cardio-)pulmonary syndrome [HPS] [HCPS]                      |
| B33.8 | Other specified viral diseases                                           |
| B34   | Viral infection of unspecified site                                      |
| B34.0 | Adenovirus infection, unspecified site                                   |
| B34.1 | Enterovirus infection, unspecified site                                  |
| B34.2 | Coronavirus infection, unspecified site                                  |
| B34.3 | Parvovirus infection, unspecified site                                   |
| B34.4 | Papovavirus infection, unspecified site                                  |
| B34.8 | Other viral infections of unspecified site                               |
| B34.9 | Viral infection, unspecified                                             |
| B35*  | Dermatophytosis                                                          |
| B36*  | Other superficial mycoses                                                |
| B37   | Candidiasis                                                              |
| B37.0 | Candidal stomatitis                                                      |
| B37.1 | Pulmonary candidiasis                                                    |
| B37.2 | Candidiasis of skin and nail                                             |
| B37.3 | Candidiasis of vulva and vagina                                          |



|       |                                                 |
|-------|-------------------------------------------------|
| B37.4 | Candidiasis of other urogenital sites           |
| B37.5 | Candidal meningitis                             |
| B37.6 | Candidal endocarditis                           |
| B37.7 | Candidal sepsis                                 |
| B37.8 | Candidiasis of other sites                      |
| B37.9 | Candidiasis, unspecified                        |
| B38   | Coccidioidomycosis                              |
| B38.0 | Acute pulmonary coccidioidomycosis              |
| B38.1 | Chronic pulmonary coccidioidomycosis            |
| B38.2 | Pulmonary coccidioidomycosis, unspecified       |
| B38.3 | Cutaneous coccidioidomycosis                    |
| B38.4 | Coccidioidomycosis meningitis                   |
| B38.7 | Disseminated coccidioidomycosis                 |
| B38.8 | Other forms of coccidioidomycosis               |
| B38.9 | Coccidioidomycosis, unspecified                 |
| B39   | Histoplasmosis                                  |
| B39.0 | Acute pulmonary histoplasmosis capsulati        |
| B39.1 | Chronic pulmonary histoplasmosis capsulati      |
| B39.2 | Pulmonary histoplasmosis capsulati, unspecified |
| B39.3 | Disseminated histoplasmosis capsulati           |
| B39.4 | Histoplasmosis capsulati, unspecified           |
| B39.5 | Histoplasmosis duboisii                         |
| B39.9 | Histoplasmosis, unspecified                     |
| B40   | Blastomycosis                                   |
| B40.0 | Acute pulmonary blastomycosis                   |
| B40.1 | Chronic pulmonary blastomycosis                 |
| B40.2 | Pulmonary blastomycosis, unspecified            |
| B40.3 | Cutaneous blastomycosis                         |
| B40.7 | Disseminated blastomycosis                      |
| B40.8 | Other forms of blastomycosis                    |
| B40.9 | Blastomycosis, unspecified                      |
| B41   | Paracoccidioidomycosis                          |
| B41.0 | Pulmonary paracoccidioidomycosis                |
| B41.7 | Disseminated paracoccidioidomycosis             |
| B41.8 | Other forms of paracoccidioidomycosis           |
| B41.9 | Paracoccidioidomycosis, unspecified             |
| B42   | Sporotrichosis                                  |
| B42.0 | Pulmonary sporotrichosis                        |

|       |                                            |
|-------|--------------------------------------------|
| B42.1 | Lymphocutaneous sporotrichosis             |
| B42.7 | Disseminated sporotrichosis                |
| B42.8 | Other forms of sporotrichosis              |
| B42.9 | Sporotrichosis, unspecified                |
| B43   | Chromomycosis and phaeomycotic abscess     |
| B43.0 | Cutaneous chromomycosis                    |
| B43.1 | Phaeomycotic brain abscess                 |
| B43.2 | Subcutaneous phaeomycotic abscess and cyst |
| B43.8 | Other forms of chromomycosis               |
| B43.9 | Chromomycosis, unspecified                 |
| B44*  | Aspergillosis                              |
| B45   | Cryptococcosis                             |
| B45.0 | Pulmonary cryptococcosis                   |
| B45.1 | Cerebral cryptococcosis                    |
| B45.2 | Cutaneous cryptococcosis                   |
| B45.3 | Osseous cryptococcosis                     |
| B45.7 | Disseminated cryptococcosis                |
| B45.8 | Other forms of cryptococcosis              |
| B45.9 | Cryptococcosis, unspecified                |
| B46   | Zygomycosis                                |
| B46.0 | Pulmonary mucormycosis                     |
| B46.1 | Rhinocerebral mucormycosis                 |
| B46.2 | Gastrointestinal mucormycosis              |
| B46.3 | Cutaneous mucormycosis                     |
| B46.4 | Disseminated mucormycosis                  |
| B46.5 | Mucormycosis, unspecified                  |
| B46.8 | Other zygomycoses                          |
| B46.9 | Zygomycosis, unspecified                   |
| B47   | Mycetoma                                   |
| B47.0 | Eumycetoma                                 |
| B47.1 | Actinomycetoma                             |
| B47.9 | Mycetoma, unspecified                      |
| B48   | Other mycoses, not elsewhere classified    |
| B48.0 | Lobomycosis                                |
| B48.1 | Rhinosporidiosis                           |
| B48.2 | Allescheriasis                             |
| B48.3 | Geotrichosis                               |
| B48.4 | Penicillois                                |

|       |                                                                          |
|-------|--------------------------------------------------------------------------|
| B48.7 | Opportunistic mycoses                                                    |
| B48.8 | Other specified mycoses                                                  |
| B49*  | Unspecified mycosis                                                      |
| B50*  | Plasmodium falciparum malaria                                            |
| B50.0 | Plasmodium falciparum malaria with cerebral complications                |
| B50.8 | Other severe and complicated Plasmodium falciparum malaria               |
| B50.9 | Plasmodium falciparum malaria, unspecified                               |
| B51*  | Plasmodium vivax malaria                                                 |
| B52*  | Plasmodium malariae malaria                                              |
| B53   | Other parasitologically confirmed malaria                                |
| B53.0 | Plasmodium ovale malaria                                                 |
| B53.1 | Malaria due to simian plasmodia                                          |
| B53.8 | Other parasitologically confirmed malaria, not elsewhere classified      |
| B54*  | Unspecified malaria                                                      |
| B55.0 | Visceral leishmaniasis                                                   |
| B55.1 | Cutaneous leishmaniasis                                                  |
| B55.2 | Mucocutaneous leishmaniasis                                              |
| B55.9 | Leishmaniasis, unspecified                                               |
| B56*  | African trypanosomiasis                                                  |
| B57*  | Chagas disease                                                           |
| B58   | Toxoplasmosis                                                            |
| B58.0 | Toxoplasma oculopathy                                                    |
| B58.1 | Toxoplasma hepatitis                                                     |
| B58.2 | Toxoplasma meningoencephalitis                                           |
| B58.3 | Pulmonary toxoplasmosis                                                  |
| B58.8 | Toxoplasmosis with other organ involvement                               |
| B58.9 | Toxoplasmosis, unspecified                                               |
| B59*  | Pneumocystosis                                                           |
| B60.0 | Babesiosis                                                               |
| B60.1 | Acanthamoebiasis                                                         |
| B60.2 | Naegleriasis                                                             |
| B60.8 | Other specified protozoal diseases                                       |
| B64*  | Unspecified protozoal disease                                            |
| B65   | Schistosomiasis [bilharziasis]                                           |
| B65.0 | Schistosomiasis due to Schistosoma haematobium [urinary schistosomiasis] |
| B65.1 | Schistosomiasis due to Schistosoma mansoni [intestinal schistosomiasis]  |
| B65.2 | Schistosomiasis due to Schistosoma japonicum                             |
| B65.3 | Cercarial dermatitis                                                     |

|       |                                         |
|-------|-----------------------------------------|
| B65.8 | Other schistosomiasis                   |
| B65.9 | Schistosomiasis, unspecified            |
| B66   | Other fluke infections                  |
| B66.0 | Opisthorchiasis                         |
| B66.1 | Clonorchiasis                           |
| B66.2 | Dicrocoeliasis                          |
| B66.3 | Fascioliasis                            |
| B66.4 | Paragonimiasis                          |
| B66.5 | Fasciolopsiasis                         |
| B66.8 | Other specified fluke infections        |
| B66.9 | Fluke infection, unspecified            |
| B67*  | Echinococcosis                          |
| B68   | Taeniasis                               |
| B68.0 | Taenia solium taeniasis                 |
| B68.1 | Taenia saginata taeniasis               |
| B68.9 | Taeniasis, unspecified                  |
| B69   | Cysticercosis                           |
| B69.0 | Cysticercosis of central nervous system |
| B69.1 | Cysticercosis of eye                    |
| B69.8 | Cysticercosis of other sites            |
| B69.9 | Cysticercosis, unspecified              |
| B70   | Diphyllobothriasis and sparganosis      |
| B70.0 | Diphyllobothriasis                      |
| B70.1 | Sparganosis                             |
| B71   | Other cestode infections                |
| B71.0 | Hymenolepiasis                          |
| B71.1 | Dipylidiasis                            |
| B71.8 | Other specified cestode infections      |
| B71.9 | Cestode infection, unspecified          |
| B72*  | Dracunculiasis                          |
| B73*  | Onchocerciasis                          |
| B74*  | Filariasis                              |
| B75*  | Trichinellosis                          |
| B76*  | Hookworm diseases                       |
| B77*  | Ascariasis                              |
| B78*  | Strongyloidiasis                        |
| B79*  | Trichuriasis                            |
| B80*  | Enterobiasis                            |

|       |                                                                                                                |
|-------|----------------------------------------------------------------------------------------------------------------|
| B81   | Other intestinal helminthiases, not elsewhere classified                                                       |
| B81.0 | Anisakiasis                                                                                                    |
| B81.1 | Intestinal capillariasis                                                                                       |
| B81.2 | Trichostrongyliasis                                                                                            |
| B81.3 | Intestinal angiostrongyliasis                                                                                  |
| B81.4 | Mixed intestinal helminthiases                                                                                 |
| B81.8 | Other specified intestinal helminthiases                                                                       |
| B82   | Unspecified intestinal parasitism                                                                              |
| B82.0 | Intestinal helminthiasis, unspecified                                                                          |
| B82.9 | Intestinal parasitism, unspecified                                                                             |
| B83   | Other helminthiases                                                                                            |
| B83.0 | Visceral larva migrans                                                                                         |
| B83.1 | Gnathostomiasis                                                                                                |
| B83.2 | Angiostrongyliasis due to <i>Parastrongylus cantonensis</i>                                                    |
| B83.3 | Syngamiasis                                                                                                    |
| B83.4 | Internal hirudiniasis                                                                                          |
| B83.8 | Other specified helminthiases                                                                                  |
| B83.9 | Helminthiasis, unspecified                                                                                     |
| B85*  | Pediculosis and phthiriasis                                                                                    |
| B86*  | Scabies                                                                                                        |
| B87*  | Myiasis                                                                                                        |
| B88   | Other infestations                                                                                             |
| B88.0 | Other acariasis                                                                                                |
| B88.1 | Tungiasis [sandflea infestation]                                                                               |
| B88.2 | Other arthropod infestations                                                                                   |
| B88.3 | External hirudiniasis                                                                                          |
| B88.8 | Other specified infestations                                                                                   |
| B88.9 | Infestation, unspecified                                                                                       |
| B89*  | Unspecified parasitic disease                                                                                  |
| B95*  | <i>Streptococcus</i> and <i>staphylococcus</i> as the cause of diseases classified to other chapters           |
| B96.0 | <i>Mycoplasma pneumoniae</i> [ <i>M. pneumoniae</i> ] as the cause of diseases classified to other chapters    |
| B96.1 | <i>Klebsiella pneumoniae</i> [ <i>K. pneumoniae</i> ] as the cause of diseases classified to other chapters    |
| B96.2 | <i>Escherichia coli</i> [ <i>E. coli</i> ] as the cause of diseases classified to other chapters               |
| B96.3 | <i>Haemophilus influenzae</i> [ <i>H. influenzae</i> ] as the cause of diseases classified to other chapters   |
| B96.4 | <i>Proteus (mirabilis)(morganii)</i> as the cause of diseases classified to other chapters                     |
| B96.5 | <i>Pseudomonas (aeruginosa)</i> as the cause of diseases classified to other chapters                          |
| B96.6 | <i>Bacillus fragilis</i> [ <i>B. fragilis</i> ] as the cause of diseases classified to other chapters          |
| B96.7 | <i>Clostridium perfringens</i> [ <i>C. perfringens</i> ] as the cause of diseases classified to other chapters |

|       |                                                                                                              |
|-------|--------------------------------------------------------------------------------------------------------------|
| B96.8 | Other specified bacterial agents as the cause of diseases classified to other chapters                       |
| B97   | Viral agents as the cause of diseases classified to other chapters                                           |
| B97.0 | Adenovirus as the cause of diseases classified to other chapters                                             |
| B97.1 | Enterovirus as the cause of diseases classified to other chapters                                            |
| B97.2 | Coronavirus as the cause of diseases classified to other chapters                                            |
| B97.3 | Retrovirus as the cause of diseases classified to other chapters                                             |
| B97.4 | Respiratory syncytial virus as the cause of diseases classified to other chapters                            |
| B97.5 | Reovirus as the cause of diseases classified to other chapters                                               |
| B97.6 | Parvovirus as the cause of diseases classified to other chapters                                             |
| B97.7 | Papillomavirus as the cause of diseases classified to other chapters                                         |
| B97.8 | Other viral agents as the cause of diseases classified to other chapters                                     |
| B98.0 | Helicobacter pylori [H.pylori] as the cause of diseases classified to other chapters                         |
| B98.1 | Vibrio vulnificus as the cause of diseases classified to other chapters                                      |
| B99*  | Other and unspecified infectious diseases                                                                    |
| C46   | Kaposi sarcoma                                                                                               |
| D73.3 | Abscess of spleen                                                                                            |
| E32.1 | Abscess of thymus                                                                                            |
| G00   | Bacterial meningitis, not elsewhere classified                                                               |
| G00.0 | Haemophilus meningitis                                                                                       |
| G00.1 | Pneumococcal meningitis                                                                                      |
| G00.2 | Streptococcal meningitis                                                                                     |
| G00.3 | Staphylococcal meningitis                                                                                    |
| G00.8 | Other bacterial meningitis                                                                                   |
| G00.9 | Bacterial meningitis, unspecified                                                                            |
| G01*  | Meningitis in bacterial diseases classified elsewhere                                                        |
| G02.0 | Meningitis in viral diseases classified elsewhere                                                            |
| G02.1 | Meningitis in mycoses                                                                                        |
| G02.8 | Meningitis in other specified infectious and parasitic diseases classified elsewhere                         |
| G03*  | Meningitis due to other and unspecified causes                                                               |
| G04.1 | Tropical spastic paraplegia                                                                                  |
| G04.2 | Bacterial meningoencephalitis and meningomyelitis, not elsewhere classified                                  |
| G05.0 | Encephalitis, myelitis and encephalomyelitis in bacterial diseases classified elsewhere                      |
| G05.1 | Encephalitis, myelitis and encephalomyelitis in viral diseases classified elsewhere                          |
| G05.2 | Encephalitis, myelitis and encephalomyelitis in other infectious and parasitic diseases classified elsewhere |
| G06*  | Intracranial and intraspinal abscess and granuloma                                                           |
| G07*  | Intracranial and intraspinal abscess and granuloma in diseases classified elsewhere                          |
| H00*  | Hordeolum and chalazion                                                                                      |
| H01.0 | Blepharitis                                                                                                  |

|       |                                                                                                    |
|-------|----------------------------------------------------------------------------------------------------|
| H05.0 | Acute inflammation of orbit                                                                        |
| H06.1 | Parasitic infestation of orbit in diseases classified elsewhere                                    |
| H10.0 | Mucopurulent conjunctivitis                                                                        |
| H10.5 | Blepharoconjunctivitis                                                                             |
| H13.0 | Filarial infection of conjunctiva                                                                  |
| H19.0 | Scleritis and episcleritis in diseases classified elsewhere                                        |
| H19.1 | Herpesviral keratitis and keratoconjunctivitis                                                     |
| H19.2 | Keratitis and keratoconjunctivitis in other infectious and parasitic diseases classified elsewhere |
| H22.0 | Iridocyclitis in infectious and parasitic diseases classified elsewhere                            |
| H32.0 | Chorioretinal inflammation in infectious and parasitic diseases classified elsewhere               |
| H44.0 | Purulent endophthalmitis                                                                           |
| H60.0 | Abscess of external ear                                                                            |
| H60.1 | Cellulitis of external ear                                                                         |
| H60.2 | Malignant otitis externa                                                                           |
| H60.3 | Other infective otitis externa                                                                     |
| H62.0 | Otitis externa in bacterial diseases classified elsewhere                                          |
| H62.1 | Otitis externa in viral diseases classified elsewhere                                              |
| H62.2 | Otitis externa in mycoses                                                                          |
| H62.3 | Otitis externa in other infectious and parasitic diseases classified elsewhere                     |
| H66.0 | Acute suppurative otitis media                                                                     |
| H67.0 | Otitis media in bacterial diseases classified elsewhere                                            |
| H67.1 | Otitis media in viral diseases classified elsewhere                                                |
| H70.0 | Acute mastoiditis                                                                                  |
| H75.0 | Mastoiditis in infectious and parasitic diseases classified elsewhere                              |
| I30.1 | Infective pericarditis                                                                             |
| I32.0 | Pericarditis in bacterial diseases classified elsewhere                                            |
| I32.1 | Pericarditis in other infectious and parasitic diseases classified elsewhere                       |
| I33.0 | Acute and subacute infective endocarditis                                                          |
| I40.0 | Infective myocarditis                                                                              |
| I41.0 | Myocarditis in bacterial diseases classified elsewhere                                             |
| I41.1 | Myocarditis in viral diseases classified elsewhere                                                 |
| I41.2 | Myocarditis in other infectious and parasitic diseases classified elsewhere                        |
| I43.0 | Cardiomyopathy in infectious and parasitic diseases classified elsewhere                           |
| I52.0 | Other heart disorders in bacterial diseases classified elsewhere                                   |
| I52.1 | Other heart disorders in other infectious and parasitic diseases classified elsewhere              |
| I68.1 | Cerebral arteritis in infectious and parasitic diseases classified elsewhere                       |
| J01.0 | Acute maxillary sinusitis                                                                          |
| J02   | Acute pharyngitis                                                                                  |

|       |                                                                       |
|-------|-----------------------------------------------------------------------|
| J02.0 | Streptococcal pharyngitis                                             |
| J02.8 | Acute pharyngitis due to other specified organisms                    |
| J02.9 | Acute pharyngitis, unspecified                                        |
| J03   | Acute tonsillitis                                                     |
| J03.0 | Streptococcal tonsillitis                                             |
| J03.8 | Acute tonsillitis due to other specified organisms                    |
| J03.9 | Acute tonsillitis, unspecified                                        |
| J04*  | Acute laryngitis and tracheitis                                       |
| J05.1 | Acute epiglottitis                                                    |
| J09*  | Influenza due to certain identified influenza virus                   |
| J10*  | Influenza due to other identified influenza virus                     |
| J11*  | Influenza, virus not identified                                       |
| J12*  | Viral pneumonia, not elsewhere classified                             |
| J13*  | Pneumonia due to <i>Streptococcus pneumoniae</i>                      |
| J14*  | Pneumonia due to <i>Haemophilus influenzae</i>                        |
| J15   | Bacterial pneumonia, not elsewhere classified                         |
| J15.0 | Pneumonia due to <i>Klebsiella pneumoniae</i>                         |
| J15.1 | Pneumonia due to <i>Pseudomonas</i>                                   |
| J15.2 | Pneumonia due to staphylococcus                                       |
| J15.3 | Pneumonia due to streptococcus, group B                               |
| J15.4 | Pneumonia due to other streptococci                                   |
| J15.5 | Pneumonia due to <i>Escherichia coli</i>                              |
| J15.6 | Pneumonia due to other aerobic Gram-negative bacteria                 |
| J15.7 | Pneumonia due to <i>Mycoplasma pneumoniae</i>                         |
| J15.8 | Other bacterial pneumonia                                             |
| J15.9 | Bacterial pneumonia, unspecified                                      |
| J16   | Pneumonia due to other infectious organisms, not elsewhere classified |
| J16.0 | Chlamydial pneumonia                                                  |
| J16.8 | Pneumonia due to other specified infectious organisms                 |
| J17.0 | Pneumonia in bacterial diseases classified elsewhere                  |
| J17.1 | Pneumonia in viral diseases classified elsewhere                      |
| J17.2 | Pneumonia in mycoses                                                  |
| J17.3 | Pneumonia in parasitic diseases                                       |
| J17.8 | Pneumonia in other diseases classified elsewhere                      |
| J18*  | Pneumonia, organism unspecified                                       |
| J20   | Acute bronchitis                                                      |
| J20.0 | Acute bronchitis due to <i>Mycoplasma pneumoniae</i>                  |
| J20.1 | Acute bronchitis due to <i>Haemophilus influenzae</i>                 |



|       |                                                                                     |
|-------|-------------------------------------------------------------------------------------|
| J20.2 | Acute bronchitis due to streptococcus                                               |
| J20.3 | Acute bronchitis due to coxsackievirus                                              |
| J20.4 | Acute bronchitis due to parainfluenza virus                                         |
| J20.5 | Acute bronchitis due to respiratory syncytial virus                                 |
| J20.6 | Acute bronchitis due to rhinovirus                                                  |
| J20.7 | Acute bronchitis due to echovirus                                                   |
| J20.8 | Acute bronchitis due to other specified organisms                                   |
| J20.9 | Acute bronchitis, unspecified                                                       |
| J21*  | Acute bronchiolitis                                                                 |
| J21.0 | Acute bronchiolitis due to respiratory syncytial virus                              |
| J21.1 | Acute bronchiolitis due to human metapneumovirus                                    |
| J21.8 | Acute bronchiolitis due to other specified organisms                                |
| J21.9 | Acute bronchiolitis, unspecified                                                    |
| J22*  | Unspecified acute lower respiratory infection                                       |
| J36*  | Peritonsillar abscess                                                               |
| J39.0 | Retropharyngeal and parapharyngeal abscess                                          |
| J39.1 | Other abscess of pharynx                                                            |
| J85.1 | Abscess of lung with pneumonia                                                      |
| J85.2 | Abscess of lung without pneumonia                                                   |
| J85.3 | Abscess of mediastinum                                                              |
| J86*  | Pyothorax                                                                           |
| K02*  | Dental caries                                                                       |
| K04.4 | Acute apical periodontitis of pulpal origin                                         |
| K04.5 | Chronic apical periodontitis                                                        |
| K04.6 | Periapical abscess with sinus                                                       |
| K04.7 | Periapical abscess without sinus                                                    |
| K05.0 | Acute gingivitis                                                                    |
| K05.2 | Acute periodontitis                                                                 |
| K05.3 | Chronic periodontitis                                                               |
| K05.4 | Periodontosis                                                                       |
| K11.3 | Abscess of salivary gland                                                           |
| K12.2 | Cellulitis and abscess of mouth                                                     |
| K23.0 | Tuberculous oesophagitis                                                            |
| K23.1 | Megaesophagus in Chagas disease                                                     |
| K35*  | Acute appendicitis                                                                  |
| K57.0 | Diverticular disease of small intestine with perforation and abscess                |
| K57.2 | Diverticular disease of large intestine with perforation and abscess                |
| K57.4 | Diverticular disease of both small and large intestine with perforation and abscess |

|       |                                                                                   |
|-------|-----------------------------------------------------------------------------------|
| K57.8 | Diverticular disease of intestine, part unspecified, with perforation and abscess |
| K61*  | Abscess of anal and rectal regions                                                |
| K63.0 | Abscess of intestine                                                              |
| K65.0 | Acute peritonitis                                                                 |
| K67.0 | Chlamydial peritonitis                                                            |
| K67.1 | Gonococcal peritonitis                                                            |
| K67.2 | Syphilitic peritonitis                                                            |
| K67.3 | Tuberculous peritonitis                                                           |
| K67.8 | Other disorders of peritoneum in infectious diseases classified elsewhere         |
| K75.0 | Abscess of liver                                                                  |
| K77.0 | Liver disorders in infectious and parasitic diseases classified elsewhere         |
| L00*  | Staphylococcal scalded skin syndrome                                              |
| L01*  | Impetigo                                                                          |
| L02*  | Cutaneous abscess, furuncle and carbuncle                                         |
| L03*  | Cellulitis                                                                        |
| L04*  | Acute lymphadenitis                                                               |
| L05*  | Pilonidal cyst                                                                    |
| L08*  | Other local infections of skin and subcutaneous tissue                            |
| L70.1 | Acne conglobata                                                                   |
| M00   | Pyogenic arthritis                                                                |
| M00.0 | Staphylococcal arthritis and polyarthritis                                        |
| M00.1 | Pneumococcal arthritis and polyarthritis                                          |
| M00.2 | Other streptococcal arthritis and polyarthritis                                   |
| M00.8 | Arthritis and polyarthritis due to other specified bacterial agents               |
| M00.9 | Pyogenic arthritis, unspecified                                                   |
| M01.0 | Meningococcal arthritis                                                           |
| M01.1 | Tuberculous arthritis                                                             |
| M01.2 | Arthritis in Lyme disease                                                         |
| M01.3 | Arthritis in other bacterial diseases classified elsewhere                        |
| M01.4 | Rubella arthritis                                                                 |
| M01.5 | Arthritis in other viral diseases classified elsewhere                            |
| M01.6 | Arthritis in mycoses                                                              |
| M01.8 | Arthritis in other infectious and parasitic diseases classified elsewhere         |
| M46.2 | Osteomyelitis of vertebra                                                         |
| M46.3 | Infection of intervertebral disc (pyogenic)                                       |
| M46.5 | Other infective spondylopathies                                                   |
| M49.0 | Tuberculosis of spine                                                             |
| M49.1 | Brucella spondylitis                                                              |

|       |                                                                                                |
|-------|------------------------------------------------------------------------------------------------|
| M49.2 | Enterobacterial spondylitis                                                                    |
| M49.3 | Spondylopathy in other infectious and parasitic diseases classified elsewhere                  |
| M60.0 | Infective myositis                                                                             |
| M63.0 | Myositis in bacterial diseases classified elsewhere                                            |
| M63.1 | Myositis in protozoal and parasitic infections classified elsewhere                            |
| M63.2 | Myositis in other infectious diseases classified elsewhere                                     |
| M65.0 | Abscess of tendon sheath                                                                       |
| M65.1 | Other infective (teno)synovitis                                                                |
| M71.0 | Abscess of bursa                                                                               |
| M71.1 | Other infective bursitis                                                                       |
| M72.6 | Necrotizing fasciitis                                                                          |
| M73.0 | Gonococcal bursitis                                                                            |
| M73.1 | Syphilitic bursitis                                                                            |
| M86*  | Osteomyelitis                                                                                  |
| M86.0 | Acute haematogenous osteomyelitis                                                              |
| M86.1 | Other acute osteomyelitis                                                                      |
| M86.2 | Subacute osteomyelitis                                                                         |
| M86.3 | Chronic multifocal osteomyelitis                                                               |
| M86.4 | Chronic osteomyelitis with draining sinus                                                      |
| M86.5 | Other chronic haematogenous osteomyelitis                                                      |
| M86.6 | Other chronic osteomyelitis                                                                    |
| M86.8 | Other osteomyelitis                                                                            |
| M86.9 | Osteomyelitis, unspecified                                                                     |
| N08.0 | Glomerular disorders in infectious and parasitic diseases classified elsewhere                 |
| N10*  | Acute tubulo-interstitial nephritis                                                            |
| N13.6 | Pyonephrosis                                                                                   |
| N15.1 | Renal and perinephric abscess                                                                  |
| N16.0 | Renal tubulo-interstitial disorders in infectious and parasitic diseases classified elsewhere  |
| N29.0 | Late syphilis of kidney                                                                        |
| N29.1 | Other disorders of kidney and ureter in infectious and parasitic diseases classified elsewhere |
| N30.0 | Acute cystitis                                                                                 |
| N34.0 | Urethral abscess                                                                               |
| N39.0 | Urinary tract infection, site not specified                                                    |
| N41.0 | Acute prostatitis                                                                              |
| N41.2 | Abscess of prostate                                                                            |
| N45*  | Orchitis and epididymitis                                                                      |
| N61*  | Inflammatory disorders of breast                                                               |
| N70.0 | Acute salpingitis and oophoritis                                                               |

|       |                                                                                                    |
|-------|----------------------------------------------------------------------------------------------------|
| N71.0 | Acute inflammatory disease of uterus                                                               |
| N73.0 | Acute parametritis and pelvic cellulitis                                                           |
| N73.3 | Female acute pelvic peritonitis                                                                    |
| N74   | Female pelvic inflammatory disorders in diseases classified elsewhere                              |
| N74.0 | Tuberculous infection of cervix uteri                                                              |
| N74.1 | Female tuberculous pelvic inflammatory disease                                                     |
| N74.2 | Female syphilitic pelvic inflammatory disease                                                      |
| N74.3 | Female gonococcal pelvic inflammatory disease                                                      |
| N74.4 | Female chlamydial pelvic inflammatory disease                                                      |
| N74.8 | Female pelvic inflammatory disorders in other diseases classified elsewhere                        |
| N75.1 | Abscess of Bartholin gland                                                                         |
| N76.0 | Acute vaginitis                                                                                    |
| N76.4 | Abscess of vulva                                                                                   |
| N77.0 | Ulceration of vulva in infectious and parasitic diseases classified elsewhere                      |
| N77.1 | Vaginitis, vulvitis and vulvovaginitis in infectious and parasitic diseases classified elsewhere   |
| O03.0 | Spontaneous abortion: Incomplete, complicated by genital tract and pelvic infection                |
| O03.5 | Spontaneous abortion: Complete or unspecified, complicated by genital tract and pelvic infection   |
| O04.0 | Medical abortion: Incomplete, complicated by genital tract and pelvic infection                    |
| O04.5 | Medical abortion: Complete or unspecified, complicated by genital tract and pelvic infection       |
| O05.0 | Other abortion: Incomplete, complicated by genital tract and pelvic infection                      |
| O05.5 | Other abortion: Complete or unspecified, complicated by genital tract and pelvic infection         |
| O06.0 | Unspecified abortion: Incomplete, complicated by genital tract and pelvic infection                |
| O06.5 | Unspecified abortion: Complete or unspecified, complicated by genital tract and pelvic infection   |
| O07.0 | Failed medical abortion, complicated by genital tract and pelvic infection                         |
| O07.5 | Other and unspecified failed attempted abortion, complicated by genital tract and pelvic infection |
| O08.0 | Genital tract and pelvic infection following abortion and ectopic and molar pregnancy              |
| O23.0 | Infections of kidney in pregnancy                                                                  |
| O23.1 | Infections of bladder in pregnancy                                                                 |
| O23.2 | Infections of urethra in pregnancy                                                                 |
| O23.3 | Infections of other parts of urinary tract in pregnancy                                            |
| O23.4 | Unspecified infection of urinary tract in pregnancy                                                |
| O23.5 | Infections of the genital tract in pregnancy                                                       |
| O23.9 | Other and unspecified genitourinary tract infection in pregnancy                                   |
| O75.3 | Other infection during labour                                                                      |
| O85*  | Puerperal sepsis                                                                                   |
| O86*  | Other puerperal infections                                                                         |
| O91.0 | Infection of nipple associated with childbirth                                                     |
| O91.1 | Abscess of breast associated with childbirth                                                       |

|       |                                                                                                                             |
|-------|-----------------------------------------------------------------------------------------------------------------------------|
| O98   | Maternal infectious and parasitic diseases classifiable elsewhere but complicating pregnancy, childbirth and the puerperium |
| O98.0 | Tuberculosis complicating pregnancy, childbirth and the puerperium                                                          |
| O98.1 | Syphilis complicating pregnancy, childbirth and the puerperium                                                              |
| O98.2 | Gonorrhoea complicating pregnancy, childbirth and the puerperium                                                            |
| O98.3 | Other infections with a predominantly sexual mode of transmission complicating pregnancy, childbirth and the puerperium     |
| O98.4 | Viral hepatitis complicating pregnancy, childbirth and the puerperium                                                       |
| O98.5 | Other viral diseases complicating pregnancy, childbirth and the puerperium                                                  |
| O98.6 | Protozoal diseases complicating pregnancy, childbirth and the puerperium                                                    |
| O98.7 | Human immunodeficiency virus [HIV] disease complicating pregnancy, childbirth and the puerperium                            |
| O98.8 | Other maternal infectious and parasitic diseases complicating pregnancy, childbirth and the puerperium                      |
| O98.9 | Unspecified maternal infectious or parasitic disease complicating pregnancy, childbirth and the puerperium                  |
| P23   | Congenital pneumonia                                                                                                        |
| P23.0 | Congenital pneumonia due to viral agent                                                                                     |
| P23.1 | Congenital pneumonia due to Chlamydia                                                                                       |
| P23.2 | Congenital pneumonia due to staphylococcus                                                                                  |
| P23.3 | Congenital pneumonia due to streptococcus, group B                                                                          |
| P23.4 | Congenital pneumonia due to Escherichia coli                                                                                |
| P23.5 | Congenital pneumonia due to Pseudomonas                                                                                     |
| P23.6 | Congenital pneumonia due to other bacterial agents                                                                          |
| P23.8 | Congenital pneumonia due to other organisms                                                                                 |
| P23.9 | Congenital pneumonia, unspecified                                                                                           |
| P35.0 | Congenital rubella syndrome                                                                                                 |
| P35.1 | Congenital cytomegalovirus infection                                                                                        |
| P35.2 | Congenital herpesviral [herpes simplex] infection                                                                           |
| P35.3 | Congenital viral hepatitis                                                                                                  |
| P36   | Bacterial sepsis of newborn                                                                                                 |
| P36.0 | Sepsis of newborn due to streptococcus, group B                                                                             |
| P36.1 | Sepsis of newborn due to other and unspecified streptococci                                                                 |
| P36.2 | Sepsis of newborn due to Staphylococcus aureus                                                                              |
| P36.3 | Sepsis of newborn due to other and unspecified staphylococci                                                                |
| P36.4 | Sepsis of newborn due to Escherichia coli                                                                                   |
| P36.5 | Sepsis of newborn due to anaerobes                                                                                          |
| P36.8 | Other bacterial sepsis of newborn                                                                                           |
| P36.9 | Bacterial sepsis of newborn, unspecified                                                                                    |
| P37   | Other congenital infectious and parasitic diseases                                                                          |
| P37.0 | Congenital tuberculosis                                                                                                     |
| P37.1 | Congenital toxoplasmosis                                                                                                    |

|       |                                                                                    |
|-------|------------------------------------------------------------------------------------|
| P37.2 | Neonatal (disseminated) listeriosis                                                |
| P37.3 | Congenital falciparum malaria                                                      |
| P37.4 | Other congenital malaria                                                           |
| P37.5 | Neonatal candidiasis                                                               |
| P37.8 | Other specified congenital infectious and parasitic diseases                       |
| P37.9 | Congenital infectious and parasitic disease, unspecified                           |
| P38*  | Omphalitis of newborn with or without mild haemorrhage                             |
| P39   | Other infections specific to the perinatal period                                  |
| P39.0 | Neonatal infective mastitis                                                        |
| P39.1 | Neonatal conjunctivitis and dacryocystitis                                         |
| P39.2 | Intra-amniotic infection of fetus, not elsewhere classified                        |
| P39.3 | Neonatal urinary tract infection                                                   |
| P39.4 | Neonatal skin infection                                                            |
| P39.8 | Other specified infections specific to the perinatal period                        |
| P39.9 | Infection specific to the perinatal period, unspecified                            |
| R57.2 | Septic shock                                                                       |
| R65.0 | Systemic Inflammatory Response Syndrome of infectious origin without organ failure |
| R65.1 | Systemic Inflammatory Response Syndrome of infectious origin with organ failure    |
| Z21   | Asymptomatic human immunodeficiency virus [HIV] infection status                   |

The list above comprises almost all codes under Chapter I (Certain infectious and parasitic diseases) of ICD-10 and additionally infectious disease codes from other Chapters of ICD-10. The few excluded codes include sequelae of infectious and parasitic diseases when the infection is not anymore present [B90-B94], prion diseases and other very rare central nervous system conditions [A81.0, A81.8, A81.9], rabies [A82], smallpox [B03], common cold [J00], acute upper respiratory infections of multiple and unspecified sites [J06], complications of surgical and medical care, not elsewhere classified [T80-T88], and codes for special purposes [U00-U85]. UK Biobank replication analysis comprised all codes under Chapter I (Certain infectious and parasitic diseases) of ICD-10 and the same codes from other Chapters of ICD-10 as the primary analysis. \* indicates inclusion of underlying 4- and 5-digit codes.

#### All bacterial infections

|       |                                                |
|-------|------------------------------------------------|
| A00*  | Cholera                                        |
| A01*  | Typhoid and paratyphoid fevers                 |
| A02   | Other salmonella infections                    |
| A02.0 | Salmonella enteritis                           |
| A02.1 | Salmonella sepsis                              |
| A02.2 | Localized salmonella infections                |
| A02.8 | Other specified salmonella infections          |
| A02.9 | Salmonella infection, unspecified              |
| A03   | Shigellosis                                    |
| A03.0 | Shigellosis due to <i>Shigella dysenteriae</i> |
| A03.1 | Shigellosis due to <i>Shigella flexneri</i>    |
| A03.2 | Shigellosis due to <i>Shigella boydii</i>      |
| A03.3 | Shigellosis due to <i>Shigella sonnei</i>      |
| A03.8 | Other shigellosis                              |

|       |                                                                             |
|-------|-----------------------------------------------------------------------------|
| A03.9 | Shigellosis, unspecified                                                    |
| A04   | Other bacterial intestinal infections                                       |
| A04.0 | Enteropathogenic Escherichia coli infection                                 |
| A04.1 | Enterotoxigenic Escherichia coli infection                                  |
| A04.2 | Enteroinvasive Escherichia coli infection                                   |
| A04.3 | Enterohaemorrhagic Escherichia coli infection                               |
| A04.4 | Other intestinal Escherichia coli infections                                |
| A04.5 | Campylobacter enteritis                                                     |
| A04.6 | Enteritis due to Yersinia enterocolitica                                    |
| A04.7 | Enterocolitis due to Clostridium difficile                                  |
| A04.8 | Other specified bacterial intestinal infections                             |
| A04.9 | Bacterial intestinal infection, unspecified                                 |
| A05   | Other bacterial foodborne intoxications, not elsewhere classified           |
| A05.0 | Foodborne staphylococcal intoxication                                       |
| A05.1 | Botulism                                                                    |
| A05.2 | Foodborne Clostridium perfringens [Clostridium welchii] intoxication        |
| A05.3 | Foodborne Vibrio parahaemolyticus intoxication                              |
| A05.4 | Foodborne Bacillus cereus intoxication                                      |
| A05.8 | Other specified bacterial foodborne intoxications                           |
| A05.9 | Bacterial foodborne intoxication, unspecified                               |
| A09*  | Other gastroenteritis and colitis of infectious and unspecified origin      |
| A15*  | Respiratory tuberculosis, bacteriologically and histologically confirmed    |
| A16*  | Respiratory tuberculosis, not confirmed bacteriologically or histologically |
| A17   | Tuberculosis of nervous system                                              |
| A17.0 | Tuberculous meningitis                                                      |
| A17.1 | Meningeal tuberculoma                                                       |
| A17.8 | Other tuberculosis of nervous system                                        |
| A17.9 | Tuberculosis of nervous system, unspecified                                 |
| A18*  | Tuberculosis of other organs                                                |
| A19*  | Miliary tuberculosis                                                        |
| A20   | Plague                                                                      |
| A20.0 | Bubonic plague                                                              |
| A20.1 | Cellulocutaneous plague                                                     |
| A20.2 | Pneumonic plague                                                            |
| A20.3 | Plague meningitis                                                           |
| A20.7 | Septicaemic plague                                                          |
| A20.8 | Other forms of plague                                                       |
| A20.9 | Plague, unspecified                                                         |
| A21   | Tularaemia                                                                  |
| A21.0 | Ulceroglandular tularaemia                                                  |
| A21.1 | Oculoglandular tularaemia                                                   |
| A21.2 | Pulmonary tularaemia                                                        |
| A21.3 | Gastrointestinal tularaemia                                                 |
| A21.7 | Generalized tularaemia                                                      |
| A21.8 | Other forms of tularaemia                                                   |
| A21.9 | Tularaemia, unspecified                                                     |
| A22   | Anthrax                                                                     |
| A22.0 | Cutaneous anthrax                                                           |

|       |                                                                       |
|-------|-----------------------------------------------------------------------|
| A22.1 | Pulmonary anthrax                                                     |
| A22.2 | Gastrointestinal anthrax                                              |
| A22.7 | Anthrax sepsis                                                        |
| A22.8 | Other forms of anthrax                                                |
| A22.9 | Anthrax, unspecified                                                  |
| A23   | Brucellosis                                                           |
| A23.0 | Brucellosis due to <i>Brucella melitensis</i>                         |
| A23.1 | Brucellosis due to <i>Brucella abortus</i>                            |
| A23.2 | Brucellosis due to <i>Brucella suis</i>                               |
| A23.3 | Brucellosis due to <i>Brucella canis</i>                              |
| A23.8 | Other brucellosis                                                     |
| A23.9 | Brucellosis, unspecified                                              |
| A24   | Glanders and melioidosis                                              |
| A24.0 | Glanders                                                              |
| A24.1 | Acute and fulminating melioidosis                                     |
| A24.2 | Subacute and chronic melioidosis                                      |
| A24.3 | Other melioidosis                                                     |
| A25   | Rat-bite fevers                                                       |
| A25.0 | Spirillosis                                                           |
| A25.1 | Streptobacillosis                                                     |
| A25.9 | Rat-bite fever, unspecified                                           |
| A26   | Erysipeloid                                                           |
| A26.0 | Cutaneous erysipeloid                                                 |
| A26.7 | Erysipelothrix sepsis                                                 |
| A26.8 | Other forms of erysipeloid                                            |
| A26.9 | Erysipeloid, unspecified                                              |
| A27*  | Leptospirosis                                                         |
| A28   | Other zoonotic bacterial diseases, not elsewhere classified           |
| A28.0 | Pasteurellosis                                                        |
| A28.1 | Cat-scratch disease                                                   |
| A28.2 | Extraintestinal yersiniosis                                           |
| A28.8 | Other specified zoonotic bacterial diseases, not elsewhere classified |
| A28.9 | Zoonotic bacterial disease, unspecified                               |
| A30*  | Leprosy [Hansen disease]                                              |
| A31*  | Infection due to other mycobacteria                                   |
| A32   | Listeriosis                                                           |
| A32.0 | Cutaneous listeriosis                                                 |
| A32.1 | Listerial meningitis and meningoencephalitis                          |
| A32.7 | Listerial sepsis                                                      |
| A32.8 | Other forms of listeriosis                                            |
| A32.9 | Listeriosis, unspecified                                              |
| A33*  | Tetanus neonatorum                                                    |
| A34*  | Obstetrical tetanus                                                   |
| A35*  | Other tetanus                                                         |
| A36*  | Diphtheria                                                            |
| A37*  | Whooping cough                                                        |
| A38*  | Scarlet fever                                                         |
| A39   | Meningococcal infection                                               |



|       |                                                   |
|-------|---------------------------------------------------|
| A39.0 | Meningococcal meningitis                          |
| A39.1 | Waterhouse-Friderichsen syndrome                  |
| A39.2 | Acute meningococcaemia                            |
| A39.3 | Chronic meningococcaemia                          |
| A39.4 | Meningococcaemia, unspecified                     |
| A39.5 | Meningococcal heart disease                       |
| A39.8 | Other meningococcal infections                    |
| A39.9 | Meningococcal infection, unspecified              |
| A40   | Streptococcal sepsis                              |
| A40.0 | Sepsis due to streptococcus, group A              |
| A40.1 | Sepsis due to streptococcus, group B              |
| A40.2 | Sepsis due to streptococcus, group D              |
| A40.3 | Sepsis due to Streptococcus pneumoniae            |
| A40.8 | Other streptococcal sepsis                        |
| A40.9 | Streptococcal sepsis, unspecified                 |
| A41   | Other sepsis                                      |
| A41.0 | Sepsis due to Staphylococcus aureus               |
| A41.1 | Sepsis due to other specified staphylococcus      |
| A41.2 | Sepsis due to unspecified staphylococcus          |
| A41.3 | Sepsis due to Haemophilus influenzae              |
| A41.4 | Sepsis due to anaerobes                           |
| A41.5 | Sepsis due to other Gram-negative organisms       |
| A41.8 | Other specified sepsis                            |
| A41.9 | Sepsis, unspecified                               |
| A42   | Actinomycosis                                     |
| A42.0 | Pulmonary actinomycosis                           |
| A42.1 | Abdominal actinomycosis                           |
| A42.2 | Cervicofacial actinomycosis                       |
| A42.7 | Actinomycotic sepsis                              |
| A42.8 | Other forms of actinomycosis                      |
| A42.9 | Actinomycosis, unspecified                        |
| A43   | Nocardiosis                                       |
| A43.0 | Pulmonary nocardiosis                             |
| A43.1 | Cutaneous nocardiosis                             |
| A43.8 | Other forms of nocardiosis                        |
| A44   | Bartonellosis                                     |
| A44.0 | Systemic bartonellosis                            |
| A44.1 | Cutaneous and mucocutaneous bartonellosis         |
| A44.8 | Other forms of bartonellosis                      |
| A44.9 | Bartonellosis, unspecified                        |
| A46*  | Erysipelas                                        |
| A48.0 | Gas gangrene                                      |
| A48.1 | Legionnaires disease                              |
| A48.2 | Nonpneumonic Legionnaires disease [Pontiac fever] |
| A48.3 | Toxic shock syndrome                              |
| A48.4 | Brazilian purpuric fever                          |
| A48.8 | Other specified bacterial diseases                |
| A49   | Bacterial infection of unspecified site           |

|       |                                                                                                   |
|-------|---------------------------------------------------------------------------------------------------|
| A49.0 | Staphylococcal infection, unspecified site                                                        |
| A49.1 | Streptococcal infection, unspecified site                                                         |
| A49.2 | Haemophilus influenzae infection, unspecified site                                                |
| A49.3 | Mycoplasma infection, unspecified site                                                            |
| A49.8 | Other bacterial infections of unspecified site                                                    |
| A49.9 | Bacterial infection, unspecified                                                                  |
| A50   | Congenital syphilis                                                                               |
| A50.0 | Early congenital syphilis, symptomatic                                                            |
| A50.1 | Early congenital syphilis, latent                                                                 |
| A50.2 | Early congenital syphilis, unspecified                                                            |
| A50.3 | Late congenital syphilitic ophthalmopathy                                                         |
| A50.4 | Late congenital neurosyphilis [juvenile neurosyphilis]                                            |
| A50.5 | Other late congenital syphilis, symptomatic                                                       |
| A50.6 | Late congenital syphilis, latent                                                                  |
| A50.7 | Late congenital syphilis, unspecified                                                             |
| A50.9 | Congenital syphilis, unspecified                                                                  |
| A51   | Early syphilis                                                                                    |
| A51.0 | Primary genital syphilis                                                                          |
| A51.1 | Primary anal syphilis                                                                             |
| A51.2 | Primary syphilis of other sites                                                                   |
| A51.3 | Secondary syphilis of skin and mucous membranes                                                   |
| A51.4 | Other secondary syphilis                                                                          |
| A51.5 | Early syphilis, latent                                                                            |
| A51.9 | Early syphilis, unspecified                                                                       |
| A52   | Late syphilis                                                                                     |
| A52.0 | Cardiovascular syphilis                                                                           |
| A52.1 | Symptomatic neurosyphilis                                                                         |
| A52.2 | Asymptomatic neurosyphilis                                                                        |
| A52.3 | Neurosyphilis, unspecified                                                                        |
| A52.7 | Other symptomatic late syphilis                                                                   |
| A52.8 | Late syphilis, latent                                                                             |
| A52.9 | Late syphilis, unspecified                                                                        |
| A53*  | Other and unspecified syphilis                                                                    |
| A54   | Gonococcal infection                                                                              |
| A54.0 | Gonococcal infection of lower genitourinary tract without periurethral or accessory gland abscess |
| A54.1 | Gonococcal infection of lower genitourinary tract with periurethral and accessory gland abscess   |
| A54.2 | Gonococcal pelviperitonitis and other gonococcal genitourinary infections                         |
| A54.3 | Gonococcal infection of eye                                                                       |
| A54.4 | Gonococcal infection of musculoskeletal system                                                    |
| A54.5 | Gonococcal pharyngitis                                                                            |
| A54.6 | Gonococcal infection of anus and rectum                                                           |
| A54.8 | Other gonococcal infections                                                                       |
| A54.9 | Gonococcal infection, unspecified                                                                 |
| A55*  | Chlamydial lymphogranuloma (venereum)                                                             |
| A56.0 | Chlamydial infection of lower genitourinary tract                                                 |
| A56.1 | Chlamydial infection of pelviperitoneum and other genitourinary organs                            |
| A56.2 | Chlamydial infection of genitourinary tract, unspecified                                          |
| A56.3 | Chlamydial infection of anus and rectum                                                           |

|       |                                                                                              |
|-------|----------------------------------------------------------------------------------------------|
| A56.4 | Chlamydial infection of pharynx                                                              |
| A56.8 | Sexually transmitted chlamydial infection of other sites                                     |
| A57*  | Chancroid                                                                                    |
| A58*  | Granuloma inguinale                                                                          |
| A64*  | Unspecified sexually transmitted disease                                                     |
| A65*  | Nonvenereal syphilis                                                                         |
| A66*  | Yaws                                                                                         |
| A67*  | Pinta [carate]                                                                               |
| A68*  | Relapsing fevers                                                                             |
| A69   | Other spirochaetal infections                                                                |
| A69.0 | Necrotizing ulcerative stomatitis                                                            |
| A69.1 | Other Vincent infections                                                                     |
| A69.2 | Lyme disease                                                                                 |
| A69.8 | Other specified spirochaetal infections                                                      |
| A69.9 | Spirochaetal infection, unspecified                                                          |
| A70*  | Chlamydia psittaci infection                                                                 |
| A71*  | Trachoma                                                                                     |
| A74.0 | Chlamydial conjunctivitis                                                                    |
| A74.8 | Other chlamydial diseases                                                                    |
| A74.9 | Chlamydial infection, unspecified                                                            |
| A75   | Typhus fever                                                                                 |
| A75.0 | Epidemic louse-borne typhus fever due to Rickettsia prowazekii                               |
| A75.1 | Recrudescent typhus [Brill disease]                                                          |
| A75.2 | Typhus fever due to Rickettsia typhi                                                         |
| A75.3 | Typhus fever due to Rickettsia tsutsugamushi                                                 |
| A75.9 | Typhus fever, unspecified                                                                    |
| A77   | Spotted fever [tick-borne rickettsioses]                                                     |
| A77.0 | Spotted fever due to Rickettsia rickettsii                                                   |
| A77.1 | Spotted fever due to Rickettsia conorii                                                      |
| A77.2 | Spotted fever due to Rickettsia sibirica                                                     |
| A77.3 | Spotted fever due to Rickettsia australis                                                    |
| A77.8 | Other spotted fevers                                                                         |
| A77.9 | Spotted fever, unspecified                                                                   |
| A78*  | Q fever                                                                                      |
| A79   | Other rickettsioses                                                                          |
| A79.0 | Trench fever                                                                                 |
| A79.1 | Rickettsialpox due to Rickettsia akari                                                       |
| A79.8 | Other specified rickettsioses                                                                |
| A79.9 | Rickettsiosis, unspecified                                                                   |
| B47.1 | Actinomycetoma                                                                               |
| B95*  | Streptococcus and staphylococcus as the cause of diseases classified to other chapters       |
| B96.0 | Mycoplasma pneumoniae [M. pneumoniae] as the cause of diseases classified to other chapters  |
| B96.1 | Klebsiella pneumoniae [K. pneumoniae] as the cause of diseases classified to other chapters  |
| B96.2 | Escherichia coli [E. coli] as the cause of diseases classified to other chapters             |
| B96.3 | Haemophilus influenzae [H. influenzae] as the cause of diseases classified to other chapters |
| B96.4 | Proteus (mirabilis)(morganii) as the cause of diseases classified to other chapters          |
| B96.5 | Pseudomonas (aeruginosa) as the cause of diseases classified to other chapters               |
| B96.6 | Bacillus fragilis [B. fragilis] as the cause of diseases classified to other chapters        |

|       |                                                                                                |
|-------|------------------------------------------------------------------------------------------------|
| B96.7 | Clostridium perfringens [C. perfringens] as the cause of diseases classified to other chapters |
| B96.8 | Other specified bacterial agents as the cause of diseases classified to other chapters         |
| B98.0 | Helicobacter pylori [H.pylori] as the cause of diseases classified to other chapters           |
| B98.1 | Vibrio vulnificus as the cause of diseases classified to other chapters                        |
| D73.3 | Abscess of spleen                                                                              |
| E32.1 | Abscess of thymus                                                                              |
| G00   | Bacterial meningitis, not elsewhere classified                                                 |
| G00.0 | Haemophilus meningitis                                                                         |
| G00.1 | Pneumococcal meningitis                                                                        |
| G00.2 | Streptococcal meningitis                                                                       |
| G00.3 | Staphylococcal meningitis                                                                      |
| G00.8 | Other bacterial meningitis                                                                     |
| G00.9 | Bacterial meningitis, unspecified                                                              |
| G01*  | Meningitis in bacterial diseases classified elsewhere                                          |
| G04.2 | Bacterial meningoencephalitis and meningomyelitis, not elsewhere classified                    |
| G05.0 | Encephalitis, myelitis and encephalomyelitis in bacterial diseases classified elsewhere        |
| G06*  | Intracranial and intraspinal abscess and granuloma                                             |
| H00*  | Hordeolum and chalazion                                                                        |
| H01.0 | Blepharitis                                                                                    |
| H05.0 | Acute inflammation of orbit                                                                    |
| H10.0 | Mucopurulent conjunctivitis                                                                    |
| H10.5 | Blepharoconjunctivitis                                                                         |
| H44.0 | Purulent endophthalmitis                                                                       |
| H60.0 | Abscess of external ear                                                                        |
| H60.1 | Cellulitis of external ear                                                                     |
| H60.2 | Malignant otitis externa                                                                       |
| H60.3 | Other infective otitis externa                                                                 |
| H62.0 | Otitis externa in bacterial diseases classified elsewhere                                      |
| H66.0 | Acute suppurative otitis media                                                                 |
| H67.0 | Otitis media in bacterial diseases classified elsewhere                                        |
| H70.0 | Acute mastoiditis                                                                              |
| I32.0 | Pericarditis in bacterial diseases classified elsewhere                                        |
| I33.0 | Acute and subacute infective endocarditis                                                      |
| I41.0 | Myocarditis in bacterial diseases classified elsewhere                                         |
| I52.0 | Other heart disorders in bacterial diseases classified elsewhere                               |
| J01.0 | Acute maxillary sinusitis                                                                      |
| J02   | Acute pharyngitis                                                                              |
| J02.0 | Streptococcal pharyngitis                                                                      |
| J02.8 | Acute pharyngitis due to other specified organisms                                             |
| J02.9 | Acute pharyngitis, unspecified                                                                 |
| J03   | Acute tonsillitis                                                                              |
| J03.0 | Streptococcal tonsillitis                                                                      |
| J03.8 | Acute tonsillitis due to other specified organisms                                             |
| J03.9 | Acute tonsillitis, unspecified                                                                 |
| J04*  | Acute laryngitis and tracheitis                                                                |
| J05.1 | Acute epiglottitis                                                                             |
| J13*  | Pneumonia due to Streptococcus pneumoniae                                                      |
| J14*  | Pneumonia due to Haemophilus influenzae                                                        |

|       |                                                                                     |
|-------|-------------------------------------------------------------------------------------|
| J15   | Bacterial pneumonia, not elsewhere classified                                       |
| J15.0 | Pneumonia due to <i>Klebsiella pneumoniae</i>                                       |
| J15.1 | Pneumonia due to <i>Pseudomonas</i>                                                 |
| J15.2 | Pneumonia due to staphylococcus                                                     |
| J15.3 | Pneumonia due to streptococcus, group B                                             |
| J15.4 | Pneumonia due to other streptococci                                                 |
| J15.5 | Pneumonia due to <i>Escherichia coli</i>                                            |
| J15.6 | Pneumonia due to other aerobic Gram-negative bacteria                               |
| J15.7 | Pneumonia due to <i>Mycoplasma pneumoniae</i>                                       |
| J15.8 | Other bacterial pneumonia                                                           |
| J15.9 | Bacterial pneumonia, unspecified                                                    |
| J16   | Pneumonia due to other infectious organisms, not elsewhere classified               |
| J16.0 | Chlamydial pneumonia                                                                |
| J16.8 | Pneumonia due to other specified infectious organisms                               |
| J17.0 | Pneumonia in bacterial diseases classified elsewhere                                |
| J17.8 | Pneumonia in other diseases classified elsewhere                                    |
| J18*  | Pneumonia, organism unspecified                                                     |
| J20.0 | Acute bronchitis due to <i>Mycoplasma pneumoniae</i>                                |
| J20.1 | Acute bronchitis due to <i>Haemophilus influenzae</i>                               |
| J20.2 | Acute bronchitis due to streptococcus                                               |
| J22*  | Unspecified acute lower respiratory infection                                       |
| J36*  | Peritonsillar abscess                                                               |
| J39.0 | Retropharyngeal and parapharyngeal abscess                                          |
| J39.1 | Other abscess of pharynx                                                            |
| J85.1 | Abscess of lung with pneumonia                                                      |
| J85.2 | Abscess of lung without pneumonia                                                   |
| J85.3 | Abscess of mediastinum                                                              |
| J86*  | Pyothorax                                                                           |
| K02*  | Dental caries                                                                       |
| K04.4 | Acute apical periodontitis of pulpal origin                                         |
| K04.5 | Chronic apical periodontitis                                                        |
| K04.6 | Periapical abscess with sinus                                                       |
| K04.7 | Periapical abscess without sinus                                                    |
| K05.0 | Acute gingivitis                                                                    |
| K05.2 | Acute periodontitis                                                                 |
| K05.3 | Chronic periodontitis                                                               |
| K05.4 | Periodontosis                                                                       |
| K11.3 | Abscess of salivary gland                                                           |
| K12.2 | Cellulitis and abscess of mouth                                                     |
| K23.0 | Tuberculous oesophagitis                                                            |
| K35*  | Acute appendicitis                                                                  |
| K57.0 | Diverticular disease of small intestine with perforation and abscess                |
| K57.2 | Diverticular disease of large intestine with perforation and abscess                |
| K57.4 | Diverticular disease of both small and large intestine with perforation and abscess |
| K57.8 | Diverticular disease of intestine, part unspecified, with perforation and abscess   |
| K61*  | Abscess of anal and rectal regions                                                  |
| K63.0 | Abscess of intestine                                                                |
| K65.0 | Acute peritonitis                                                                   |

|       |                                                                     |
|-------|---------------------------------------------------------------------|
| K67.0 | Chlamydial peritonitis                                              |
| K67.1 | Gonococcal peritonitis                                              |
| K67.2 | Syphilitic peritonitis                                              |
| K67.3 | Tuberculous peritonitis                                             |
| K75.0 | Abscess of liver                                                    |
| L00*  | Staphylococcal scalded skin syndrome                                |
| L01*  | Impetigo                                                            |
| L02*  | Cutaneous abscess, furuncle and carbuncle                           |
| L03*  | Cellulitis                                                          |
| L04*  | Acute lymphadenitis                                                 |
| L05*  | Pilonidal cyst                                                      |
| L08*  | Other local infections of skin and subcutaneous tissue              |
| L70.1 | Acne conglobata                                                     |
| M00   | Pyogenic arthritis                                                  |
| M00.0 | Staphylococcal arthritis and polyarthritis                          |
| M00.1 | Pneumococcal arthritis and polyarthritis                            |
| M00.2 | Other streptococcal arthritis and polyarthritis                     |
| M00.8 | Arthritis and polyarthritis due to other specified bacterial agents |
| M00.9 | Pyogenic arthritis, unspecified                                     |
| M01.0 | Meningococcal arthritis                                             |
| M01.1 | Tuberculous arthritis                                               |
| M01.2 | Arthritis in Lyme disease                                           |
| M01.3 | Arthritis in other bacterial diseases classified elsewhere          |
| M46.2 | Osteomyelitis of vertebra                                           |
| M46.3 | Infection of intervertebral disc (pyogenic)                         |
| M46.5 | Other infective spondylopathies                                     |
| M49.0 | Tuberculosis of spine                                               |
| M49.1 | Brucella spondylitis                                                |
| M49.2 | Enterobacterial spondylitis                                         |
| M63.0 | Myositis in bacterial diseases classified elsewhere                 |
| M65.0 | Abscess of tendon sheath                                            |
| M65.1 | Other infective (teno)synovitis                                     |
| M71.0 | Abscess of bursa                                                    |
| M71.1 | Other infective bursitis                                            |
| M72.6 | Necrotizing fasciitis                                               |
| M73.0 | Gonococcal bursitis                                                 |
| M73.1 | Syphilitic bursitis                                                 |
| M86*  | Osteomyelitis                                                       |
| M86.0 | Acute haematogenous osteomyelitis                                   |
| M86.1 | Other acute osteomyelitis                                           |
| M86.2 | Subacute osteomyelitis                                              |
| M86.3 | Chronic multifocal osteomyelitis                                    |
| M86.4 | Chronic osteomyelitis with draining sinus                           |
| M86.5 | Other chronic haematogenous osteomyelitis                           |
| M86.6 | Other chronic osteomyelitis                                         |
| M86.8 | Other osteomyelitis                                                 |
| M86.9 | Osteomyelitis, unspecified                                          |
| N10*  | Acute tubulo-interstitial nephritis                                 |

|       |                                                                                                    |
|-------|----------------------------------------------------------------------------------------------------|
| N13.6 | Pyonephrosis                                                                                       |
| N15.1 | Renal and perinephric abscess                                                                      |
| N29.0 | Late syphilis of kidney                                                                            |
| N30.0 | Acute cystitis                                                                                     |
| N34.0 | Urethral abscess                                                                                   |
| N39.0 | Urinary tract infection, site not specified                                                        |
| N41.0 | Acute prostatitis                                                                                  |
| N41.2 | Abscess of prostate                                                                                |
| N45*  | Orchitis and epididymitis                                                                          |
| N61*  | Inflammatory disorders of breast                                                                   |
| N70.0 | Acute salpingitis and oophoritis                                                                   |
| N71.0 | Acute inflammatory disease of uterus                                                               |
| N73.0 | Acute parametritis and pelvic cellulitis                                                           |
| N73.3 | Female acute pelvic peritonitis                                                                    |
| N74.0 | Tuberculous infection of cervix uteri                                                              |
| N74.1 | Female tuberculous pelvic inflammatory disease                                                     |
| N74.2 | Female syphilitic pelvic inflammatory disease                                                      |
| N74.3 | Female gonococcal pelvic inflammatory disease                                                      |
| N74.4 | Female chlamydial pelvic inflammatory disease                                                      |
| N75.1 | Abscess of Bartholin gland                                                                         |
| N76.0 | Acute vaginitis                                                                                    |
| N76.4 | Abscess of vulva                                                                                   |
| O03.0 | Spontaneous abortion: Incomplete, complicated by genital tract and pelvic infection                |
| O03.5 | Spontaneous abortion: Complete or unspecified, complicated by genital tract and pelvic infection   |
| O04.0 | Medical abortion: Incomplete, complicated by genital tract and pelvic infection                    |
| O04.5 | Medical abortion: Complete or unspecified, complicated by genital tract and pelvic infection       |
| O05.0 | Other abortion: Incomplete, complicated by genital tract and pelvic infection                      |
| O05.5 | Other abortion: Complete or unspecified, complicated by genital tract and pelvic infection         |
| O06.0 | Unspecified abortion: Incomplete, complicated by genital tract and pelvic infection                |
| O06.5 | Unspecified abortion: Complete or unspecified, complicated by genital tract and pelvic infection   |
| O07.0 | Failed medical abortion, complicated by genital tract and pelvic infection                         |
| O07.5 | Other and unspecified failed attempted abortion, complicated by genital tract and pelvic infection |
| O08.0 | Genital tract and pelvic infection following abortion and ectopic and molar pregnancy              |
| O23.0 | Infections of kidney in pregnancy                                                                  |
| O23.1 | Infections of bladder in pregnancy                                                                 |
| O23.2 | Infections of urethra in pregnancy                                                                 |
| O23.3 | Infections of other parts of urinary tract in pregnancy                                            |
| O23.4 | Unspecified infection of urinary tract in pregnancy                                                |
| O23.5 | Infections of the genital tract in pregnancy                                                       |
| O23.9 | Other and unspecified genitourinary tract infection in pregnancy                                   |
| O75.3 | Other infection during labour                                                                      |
| O85*  | Puerperal sepsis                                                                                   |
| O86*  | Other puerperal infections                                                                         |
| O91.0 | Infection of nipple associated with childbirth                                                     |
| O91.1 | Abscess of breast associated with childbirth                                                       |
| O98.0 | Tuberculosis complicating pregnancy, childbirth and the puerperium                                 |
| O98.1 | Syphilis complicating pregnancy, childbirth and the puerperium                                     |
| O98.2 | Gonorrhoea complicating pregnancy, childbirth and the puerperium                                   |

|       |                                                                                                                         |
|-------|-------------------------------------------------------------------------------------------------------------------------|
| O98.3 | Other infections with a predominantly sexual mode of transmission complicating pregnancy, childbirth and the puerperium |
| O98.8 | Other maternal infectious and parasitic diseases complicating pregnancy, childbirth and the puerperium                  |
| O98.9 | Unspecified maternal infectious or parasitic disease complicating pregnancy, childbirth and the puerperium              |
| P23   | Congenital pneumonia                                                                                                    |
| P23.1 | Congenital pneumonia due to Chlamydia                                                                                   |
| P23.2 | Congenital pneumonia due to staphylococcus                                                                              |
| P23.3 | Congenital pneumonia due to streptococcus, group B                                                                      |
| P23.4 | Congenital pneumonia due to Escherichia coli                                                                            |
| P23.5 | Congenital pneumonia due to Pseudomonas                                                                                 |
| P23.6 | Congenital pneumonia due to other bacterial agents                                                                      |
| P23.9 | Congenital pneumonia, unspecified                                                                                       |
| P36   | Bacterial sepsis of newborn                                                                                             |
| P36.0 | Sepsis of newborn due to streptococcus, group B                                                                         |
| P36.1 | Sepsis of newborn due to other and unspecified streptococci                                                             |
| P36.2 | Sepsis of newborn due to Staphylococcus aureus                                                                          |
| P36.3 | Sepsis of newborn due to other and unspecified staphylococci                                                            |
| P36.4 | Sepsis of newborn due to Escherichia coli                                                                               |
| P36.5 | Sepsis of newborn due to anaerobes                                                                                      |
| P36.8 | Other bacterial sepsis of newborn                                                                                       |
| P36.9 | Bacterial sepsis of newborn, unspecified                                                                                |
| P37.0 | Congenital tuberculosis                                                                                                 |
| P37.2 | Neonatal (disseminated) listeriosis                                                                                     |
| P38*  | Omphalitis of newborn with or without mild haemorrhage                                                                  |
| P39.0 | Neonatal infective mastitis                                                                                             |
| P39.1 | Neonatal conjunctivitis and dacryocystitis                                                                              |
| P39.2 | Intra-amniotic infection of fetus, not elsewhere classified                                                             |
| P39.3 | Neonatal urinary tract infection                                                                                        |
| P39.4 | Neonatal skin infection                                                                                                 |

#### **Invasive bacterial infections**

|       |                                                                          |
|-------|--------------------------------------------------------------------------|
| A01*  | Typhoid and paratyphoid fevers                                           |
| A02   | Other salmonella infections                                              |
| A02.0 | Salmonella enteritis                                                     |
| A02.1 | Salmonella sepsis                                                        |
| A02.2 | Localized salmonella infections                                          |
| A02.8 | Other specified salmonella infections                                    |
| A02.9 | Salmonella infection, unspecified                                        |
| A03   | Shigellosis                                                              |
| A03.0 | Shigellosis due to Shigella dysenteriae                                  |
| A03.1 | Shigellosis due to Shigella flexneri                                     |
| A03.2 | Shigellosis due to Shigella boydii                                       |
| A03.3 | Shigellosis due to Shigella sonnei                                       |
| A03.8 | Other shigellosis                                                        |
| A03.9 | Shigellosis, unspecified                                                 |
| A15*  | Respiratory tuberculosis, bacteriologically and histologically confirmed |



|       |                                                                             |
|-------|-----------------------------------------------------------------------------|
| A16*  | Respiratory tuberculosis, not confirmed bacteriologically or histologically |
| A17   | Tuberculosis of nervous system                                              |
| A17.0 | Tuberculous meningitis                                                      |
| A17.1 | Meningeal tuberculoma                                                       |
| A17.8 | Other tuberculosis of nervous system                                        |
| A17.9 | Tuberculosis of nervous system, unspecified                                 |
| A18*  | Tuberculosis of other organs                                                |
| A19*  | Miliary tuberculosis                                                        |
| A20   | Plague                                                                      |
| A20.0 | Bubonic plague                                                              |
| A20.1 | Cellulocutaneous plague                                                     |
| A20.2 | Pneumonic plague                                                            |
| A20.3 | Plague meningitis                                                           |
| A20.7 | Septicaemic plague                                                          |
| A20.8 | Other forms of plague                                                       |
| A20.9 | Plague, unspecified                                                         |
| A21   | Tularaemia                                                                  |
| A21.0 | Ulceroglandular tularaemia                                                  |
| A21.1 | Oculoglandular tularaemia                                                   |
| A21.2 | Pulmonary tularaemia                                                        |
| A21.3 | Gastrointestinal tularaemia                                                 |
| A21.7 | Generalized tularaemia                                                      |
| A21.8 | Other forms of tularaemia                                                   |
| A21.9 | Tularaemia, unspecified                                                     |
| A22   | Anthrax                                                                     |
| A22.0 | Cutaneous anthrax                                                           |
| A22.1 | Pulmonary anthrax                                                           |
| A22.2 | Gastrointestinal anthrax                                                    |
| A22.7 | Anthrax sepsis                                                              |
| A22.8 | Other forms of anthrax                                                      |
| A22.9 | Anthrax, unspecified                                                        |
| A23   | Brucellosis                                                                 |
| A23.0 | Brucellosis due to <i>Brucella melitensis</i>                               |
| A23.1 | Brucellosis due to <i>Brucella abortus</i>                                  |
| A23.2 | Brucellosis due to <i>Brucella suis</i>                                     |
| A23.3 | Brucellosis due to <i>Brucella canis</i>                                    |
| A23.8 | Other brucellosis                                                           |
| A23.9 | Brucellosis, unspecified                                                    |
| A24   | Glanders and melioidosis                                                    |
| A24.0 | Glanders                                                                    |
| A24.1 | Acute and fulminating melioidosis                                           |
| A24.2 | Subacute and chronic melioidosis                                            |
| A24.3 | Other melioidosis                                                           |
| A25   | Rat-bite fevers                                                             |
| A25.0 | Spirillosis                                                                 |
| A25.1 | Streptobacillosis                                                           |
| A25.9 | Rat-bite fever, unspecified                                                 |
| A26.7 | Erysipelothrix sepsis                                                       |

|       |                                                                       |
|-------|-----------------------------------------------------------------------|
| A26.8 | Other forms of erysipeloid                                            |
| A27*  | Leptospirosis                                                         |
| A28   | Other zoonotic bacterial diseases, not elsewhere classified           |
| A28.0 | Pasteurellosis                                                        |
| A28.1 | Cat-scratch disease                                                   |
| A28.2 | Extraintestinal yersiniosis                                           |
| A28.8 | Other specified zoonotic bacterial diseases, not elsewhere classified |
| A28.9 | Zoonotic bacterial disease, unspecified                               |
| A30*  | Leprosy [Hansen disease]                                              |
| A31*  | Infection due to other mycobacteria                                   |
| A32   | Listeriosis                                                           |
| A32.0 | Cutaneous listeriosis                                                 |
| A32.1 | Listerial meningitis and meningoencephalitis                          |
| A32.7 | Listerial sepsis                                                      |
| A32.8 | Other forms of listeriosis                                            |
| A32.9 | Listeriosis, unspecified                                              |
| A33*  | Tetanus neonatorum                                                    |
| A34*  | Obstetrical tetanus                                                   |
| A35*  | Other tetanus                                                         |
| A36*  | Diphtheria                                                            |
| A38*  | Scarlet fever                                                         |
| A39   | Meningococcal infection                                               |
| A39.0 | Meningococcal meningitis                                              |
| A39.1 | Waterhouse-Friderichsen syndrome                                      |
| A39.2 | Acute meningococcaemia                                                |
| A39.3 | Chronic meningococcaemia                                              |
| A39.4 | Meningococcaemia, unspecified                                         |
| A39.5 | Meningococcal heart disease                                           |
| A39.8 | Other meningococcal infections                                        |
| A39.9 | Meningococcal infection, unspecified                                  |
| A40   | Streptococcal sepsis                                                  |
| A40.0 | Sepsis due to streptococcus, group A                                  |
| A40.1 | Sepsis due to streptococcus, group B                                  |
| A40.2 | Sepsis due to streptococcus, group D                                  |
| A40.3 | Sepsis due to Streptococcus pneumoniae                                |
| A40.8 | Other streptococcal sepsis                                            |
| A40.9 | Streptococcal sepsis, unspecified                                     |
| A41   | Other sepsis                                                          |
| A41.0 | Sepsis due to Staphylococcus aureus                                   |
| A41.1 | Sepsis due to other specified staphylococcus                          |
| A41.2 | Sepsis due to unspecified staphylococcus                              |
| A41.3 | Sepsis due to Haemophilus influenzae                                  |
| A41.4 | Sepsis due to anaerobes                                               |
| A41.5 | Sepsis due to other Gram-negative organisms                           |
| A41.8 | Other specified sepsis                                                |
| A41.9 | Sepsis, unspecified                                                   |
| A42   | Actinomycosis                                                         |
| A42.0 | Pulmonary actinomycosis                                               |

|       |                                                        |
|-------|--------------------------------------------------------|
| A42.1 | Abdominal actinomycosis                                |
| A42.2 | Cervicofacial actinomycosis                            |
| A42.7 | Actinomycotic sepsis                                   |
| A42.8 | Other forms of actinomycosis                           |
| A42.9 | Actinomycosis, unspecified                             |
| A43   | Nocardiosis                                            |
| A43.0 | Pulmonary nocardiosis                                  |
| A43.1 | Cutaneous nocardiosis                                  |
| A43.8 | Other forms of nocardiosis                             |
| A44   | Bartonellosis                                          |
| A44.0 | Systemic bartonellosis                                 |
| A44.1 | Cutaneous and mucocutaneous bartonellosis              |
| A44.8 | Other forms of bartonellosis                           |
| A44.9 | Bartonellosis, unspecified                             |
| A46*  | Erysipelas                                             |
| A48.0 | Gas gangrene                                           |
| A48.1 | Legionnaires disease                                   |
| A48.3 | Toxic shock syndrome                                   |
| A48.4 | Brazilian purpuric fever                               |
| A48.8 | Other specified bacterial diseases                     |
| A49.0 | Staphylococcal infection, unspecified site             |
| A49.1 | Streptococcal infection, unspecified site              |
| A49.2 | Haemophilus influenzae infection, unspecified site     |
| A49.8 | Other bacterial infections of unspecified site         |
| A49.9 | Bacterial infection, unspecified                       |
| A50   | Congenital syphilis                                    |
| A50.0 | Early congenital syphilis, symptomatic                 |
| A50.1 | Early congenital syphilis, latent                      |
| A50.2 | Early congenital syphilis, unspecified                 |
| A50.3 | Late congenital syphilitic oculopathy                  |
| A50.4 | Late congenital neurosyphilis [juvenile neurosyphilis] |
| A50.5 | Other late congenital syphilis, symptomatic            |
| A50.6 | Late congenital syphilis, latent                       |
| A50.7 | Late congenital syphilis, unspecified                  |
| A50.9 | Congenital syphilis, unspecified                       |
| A51   | Early syphilis                                         |
| A51.0 | Primary genital syphilis                               |
| A51.1 | Primary anal syphilis                                  |
| A51.2 | Primary syphilis of other sites                        |
| A51.3 | Secondary syphilis of skin and mucous membranes        |
| A51.4 | Other secondary syphilis                               |
| A51.5 | Early syphilis, latent                                 |
| A51.9 | Early syphilis, unspecified                            |
| A52   | Late syphilis                                          |
| A52.0 | Cardiovascular syphilis                                |
| A52.1 | Symptomatic neurosyphilis                              |
| A52.2 | Asymptomatic neurosyphilis                             |
| A52.3 | Neurosyphilis, unspecified                             |

|       |                                                                                                              |
|-------|--------------------------------------------------------------------------------------------------------------|
| A52.7 | Other symptomatic late syphilis                                                                              |
| A52.8 | Late syphilis, latent                                                                                        |
| A52.9 | Late syphilis, unspecified                                                                                   |
| A53*  | Other and unspecified syphilis                                                                               |
| A54.1 | Gonococcal infection of lower genitourinary tract with periurethral and accessory gland abscess              |
| A54.2 | Gonococcal pelviperitonitis and other gonococcal genitourinary infections                                    |
| A54.4 | Gonococcal infection of musculoskeletal system                                                               |
| A54.8 | Other gonococcal infections                                                                                  |
| A55*  | Chlamydial lymphogranuloma (venereum)                                                                        |
| A56.1 | Chlamydial infection of pelviperitoneum and other genitourinary organs                                       |
| A65*  | Nonvenereal syphilis                                                                                         |
| A66*  | Yaws                                                                                                         |
| A67*  | Pinta [carate]                                                                                               |
| A68*  | Relapsing fevers                                                                                             |
| A69   | Other spirochaetal infections                                                                                |
| A69.0 | Necrotizing ulcerative stomatitis                                                                            |
| A69.1 | Other Vincent infections                                                                                     |
| A69.2 | Lyme disease                                                                                                 |
| A69.8 | Other specified spirochaetal infections                                                                      |
| A69.9 | Spirochaetal infection, unspecified                                                                          |
| A70*  | Chlamydia psittaci infection                                                                                 |
| A75   | Typhus fever                                                                                                 |
| A75.0 | Epidemic louse-borne typhus fever due to <i>Rickettsia prowazekii</i>                                        |
| A75.1 | Recrudescing typhus [Brill disease]                                                                          |
| A75.2 | Typhus fever due to <i>Rickettsia typhi</i>                                                                  |
| A75.3 | Typhus fever due to <i>Rickettsia tsutsugamushi</i>                                                          |
| A75.9 | Typhus fever, unspecified                                                                                    |
| A77   | Spotted fever [tick-borne rickettsioses]                                                                     |
| A77.0 | Spotted fever due to <i>Rickettsia rickettsii</i>                                                            |
| A77.1 | Spotted fever due to <i>Rickettsia conorii</i>                                                               |
| A77.2 | Spotted fever due to <i>Rickettsia sibirica</i>                                                              |
| A77.3 | Spotted fever due to <i>Rickettsia australis</i>                                                             |
| A77.8 | Other spotted fevers                                                                                         |
| A77.9 | Spotted fever, unspecified                                                                                   |
| A78*  | Q fever                                                                                                      |
| A79   | Other rickettsioses                                                                                          |
| A79.0 | Trench fever                                                                                                 |
| A79.1 | Rickettsialpox due to <i>Rickettsia akari</i>                                                                |
| A79.8 | Other specified rickettsioses                                                                                |
| A79.9 | Rickettsiosis, unspecified                                                                                   |
| B47.1 | Actinomycetoma                                                                                               |
| B95*  | Streptococcus and staphylococcus as the cause of diseases classified to other chapters                       |
| B96.1 | <i>Klebsiella pneumoniae</i> [ <i>K. pneumoniae</i> ] as the cause of diseases classified to other chapters  |
| B96.2 | <i>Escherichia coli</i> [ <i>E. coli</i> ] as the cause of diseases classified to other chapters             |
| B96.3 | <i>Haemophilus influenzae</i> [ <i>H. influenzae</i> ] as the cause of diseases classified to other chapters |
| B96.4 | <i>Proteus (mirabilis)(morganii)</i> as the cause of diseases classified to other chapters                   |
| B96.5 | <i>Pseudomonas (aeruginosa)</i> as the cause of diseases classified to other chapters                        |
| B96.6 | <i>Bacillus fragilis</i> [ <i>B. fragilis</i> ] as the cause of diseases classified to other chapters        |

|       |                                                                                                |
|-------|------------------------------------------------------------------------------------------------|
| B96.7 | Clostridium perfringens [C. perfringens] as the cause of diseases classified to other chapters |
| B96.8 | Other specified bacterial agents as the cause of diseases classified to other chapters         |
| B98.1 | Vibrio vulnificus as the cause of diseases classified to other chapters                        |
| D73.3 | Abscess of spleen                                                                              |
| E32.1 | Abscess of thymus                                                                              |
| G00   | Bacterial meningitis, not elsewhere classified                                                 |
| G00.0 | Haemophilus meningitis                                                                         |
| G00.1 | Pneumococcal meningitis                                                                        |
| G00.2 | Streptococcal meningitis                                                                       |
| G00.3 | Staphylococcal meningitis                                                                      |
| G00.8 | Other bacterial meningitis                                                                     |
| G00.9 | Bacterial meningitis, unspecified                                                              |
| G01*  | Meningitis in bacterial diseases classified elsewhere                                          |
| G04.2 | Bacterial meningoencephalitis and meningomyelitis, not elsewhere classified                    |
| G05.0 | Encephalitis, myelitis and encephalomyelitis in bacterial diseases classified elsewhere        |
| G06*  | Intracranial and intraspinal abscess and granuloma                                             |
| H05.0 | Acute inflammation of orbit                                                                    |
| H44.0 | Purulent endophthalmitis                                                                       |
| H60.0 | Abscess of external ear                                                                        |
| H60.1 | Cellulitis of external ear                                                                     |
| H60.2 | Malignant otitis externa                                                                       |
| H70.0 | Acute mastoiditis                                                                              |
| I32.0 | Pericarditis in bacterial diseases classified elsewhere                                        |
| I33.0 | Acute and subacute infective endocarditis                                                      |
| I41.0 | Myocarditis in bacterial diseases classified elsewhere                                         |
| I52.0 | Other heart disorders in bacterial diseases classified elsewhere                               |
| J05.1 | Acute epiglottitis                                                                             |
| J13*  | Pneumonia due to Streptococcus pneumoniae                                                      |
| J14*  | Pneumonia due to Haemophilus influenzae                                                        |
| J15   | Bacterial pneumonia, not elsewhere classified                                                  |
| J15.0 | Pneumonia due to Klebsiella pneumoniae                                                         |
| J15.1 | Pneumonia due to Pseudomonas                                                                   |
| J15.2 | Pneumonia due to staphylococcus                                                                |
| J15.3 | Pneumonia due to streptococcus, group B                                                        |
| J15.4 | Pneumonia due to other streptococci                                                            |
| J15.5 | Pneumonia due to Escherichia coli                                                              |
| J15.6 | Pneumonia due to other aerobic Gram-negative bacteria                                          |
| J15.7 | Pneumonia due to Mycoplasma pneumoniae                                                         |
| J15.8 | Other bacterial pneumonia                                                                      |
| J15.9 | Bacterial pneumonia, unspecified                                                               |
| J16   | Pneumonia due to other infectious organisms, not elsewhere classified                          |
| J16.0 | Chlamydial pneumonia                                                                           |
| J16.8 | Pneumonia due to other specified infectious organisms                                          |
| J17.0 | Pneumonia in bacterial diseases classified elsewhere                                           |
| J17.8 | Pneumonia in other diseases classified elsewhere                                               |
| J18*  | Pneumonia, organism unspecified                                                                |
| J36*  | Peritonsillar abscess                                                                          |
| J39.0 | Retropharyngeal and parapharyngeal abscess                                                     |

|       |                                                                                     |
|-------|-------------------------------------------------------------------------------------|
| J39.1 | Other abscess of pharynx                                                            |
| J85.1 | Abscess of lung with pneumonia                                                      |
| J85.2 | Abscess of lung without pneumonia                                                   |
| J85.3 | Abscess of mediastinum                                                              |
| J86*  | Pyothorax                                                                           |
| K12.2 | Cellulitis and abscess of mouth                                                     |
| K23.0 | Tuberculous oesophagitis                                                            |
| K35*  | Acute appendicitis                                                                  |
| K57.0 | Diverticular disease of small intestine with perforation and abscess                |
| K57.2 | Diverticular disease of large intestine with perforation and abscess                |
| K57.4 | Diverticular disease of both small and large intestine with perforation and abscess |
| K57.8 | Diverticular disease of intestine, part unspecified, with perforation and abscess   |
| K61*  | Abscess of anal and rectal regions                                                  |
| K63.0 | Abscess of intestine                                                                |
| K65.0 | Acute peritonitis                                                                   |
| K67.0 | Chlamydial peritonitis                                                              |
| K67.1 | Gonococcal peritonitis                                                              |
| K67.2 | Syphilitic peritonitis                                                              |
| K67.3 | Tuberculous peritonitis                                                             |
| K75.0 | Abscess of liver                                                                    |
| M00   | Pyogenic arthritis                                                                  |
| M00.0 | Staphylococcal arthritis and polyarthritis                                          |
| M00.1 | Pneumococcal arthritis and polyarthritis                                            |
| M00.2 | Other streptococcal arthritis and polyarthritis                                     |
| M00.8 | Arthritis and polyarthritis due to other specified bacterial agents                 |
| M00.9 | Pyogenic arthritis, unspecified                                                     |
| M01.0 | Meningococcal arthritis                                                             |
| M01.1 | Tuberculous arthritis                                                               |
| M01.2 | Arthritis in Lyme disease                                                           |
| M01.3 | Arthritis in other bacterial diseases classified elsewhere                          |
| M46.2 | Osteomyelitis of vertebra                                                           |
| M46.3 | Infection of intervertebral disc (pyogenic)                                         |
| M46.5 | Other infective spondylopathies                                                     |
| M49.0 | Tuberculosis of spine                                                               |
| M49.1 | Brucella spondylitis                                                                |
| M49.2 | Enterobacterial spondylitis                                                         |
| M63.0 | Myositis in bacterial diseases classified elsewhere                                 |
| M65.0 | Abscess of tendon sheath                                                            |
| M65.1 | Other infective (teno)synovitis                                                     |
| M71.0 | Abscess of bursa                                                                    |
| M71.1 | Other infective bursitis                                                            |
| M72.6 | Necrotizing fasciitis                                                               |
| M73.0 | Gonococcal bursitis                                                                 |
| M73.1 | Syphilitic bursitis                                                                 |
| M86*  | Osteomyelitis                                                                       |
| M86.0 | Acute haematogenous osteomyelitis                                                   |
| M86.1 | Other acute osteomyelitis                                                           |
| M86.2 | Subacute osteomyelitis                                                              |

|       |                                                                                                    |
|-------|----------------------------------------------------------------------------------------------------|
| M86.3 | Chronic multifocal osteomyelitis                                                                   |
| M86.4 | Chronic osteomyelitis with draining sinus                                                          |
| M86.5 | Other chronic haematogenous osteomyelitis                                                          |
| M86.6 | Other chronic osteomyelitis                                                                        |
| M86.8 | Other osteomyelitis                                                                                |
| M86.9 | Osteomyelitis, unspecified                                                                         |
| N10*  | Acute tubulo-interstitial nephritis                                                                |
| N13.6 | Pyonephrosis                                                                                       |
| N15.1 | Renal and perinephric abscess                                                                      |
| N29.0 | Late syphilis of kidney                                                                            |
| N34.0 | Urethral abscess                                                                                   |
| N41.2 | Abscess of prostate                                                                                |
| N45*  | Orchitis and epididymitis                                                                          |
| N61*  | Inflammatory disorders of breast                                                                   |
| N70.0 | Acute salpingitis and oophoritis                                                                   |
| N71.0 | Acute inflammatory disease of uterus                                                               |
| N73.0 | Acute parametritis and pelvic cellulitis                                                           |
| N73.3 | Female acute pelvic peritonitis                                                                    |
| N74.0 | Tuberculous infection of cervix uteri                                                              |
| N74.1 | Female tuberculous pelvic inflammatory disease                                                     |
| N74.2 | Female syphilitic pelvic inflammatory disease                                                      |
| N74.3 | Female gonococcal pelvic inflammatory disease                                                      |
| N74.4 | Female chlamydial pelvic inflammatory disease                                                      |
| N75.1 | Abscess of Bartholin gland                                                                         |
| N76.4 | Abscess of vulva                                                                                   |
| O03.0 | Spontaneous abortion: Incomplete, complicated by genital tract and pelvic infection                |
| O03.5 | Spontaneous abortion: Complete or unspecified, complicated by genital tract and pelvic infection   |
| O04.0 | Medical abortion: Incomplete, complicated by genital tract and pelvic infection                    |
| O04.5 | Medical abortion: Complete or unspecified, complicated by genital tract and pelvic infection       |
| O05.0 | Other abortion: Incomplete, complicated by genital tract and pelvic infection                      |
| O05.5 | Other abortion: Complete or unspecified, complicated by genital tract and pelvic infection         |
| O06.0 | Unspecified abortion: Incomplete, complicated by genital tract and pelvic infection                |
| O06.5 | Unspecified abortion: Complete or unspecified, complicated by genital tract and pelvic infection   |
| O07.0 | Failed medical abortion, complicated by genital tract and pelvic infection                         |
| O07.5 | Other and unspecified failed attempted abortion, complicated by genital tract and pelvic infection |
| O08.0 | Genital tract and pelvic infection following abortion and ectopic and molar pregnancy              |
| O23.0 | Infections of kidney in pregnancy                                                                  |
| O75.3 | Other infection during labour                                                                      |
| O85*  | Puerperal sepsis                                                                                   |
| O91.1 | Abscess of breast associated with childbirth                                                       |
| O98.0 | Tuberculosis complicating pregnancy, childbirth and the puerperium                                 |
| O98.1 | Syphilis complicating pregnancy, childbirth and the puerperium                                     |
| P23   | Congenital pneumonia                                                                               |
| P23.1 | Congenital pneumonia due to Chlamydia                                                              |
| P23.2 | Congenital pneumonia due to staphylococcus                                                         |
| P23.3 | Congenital pneumonia due to streptococcus, group B                                                 |
| P23.4 | Congenital pneumonia due to Escherichia coli                                                       |
| P23.5 | Congenital pneumonia due to Pseudomonas                                                            |

|       |                                                              |
|-------|--------------------------------------------------------------|
| P23.6 | Congenital pneumonia due to other bacterial agents           |
| P23.9 | Congenital pneumonia, unspecified                            |
| P36   | Bacterial sepsis of newborn                                  |
| P36.0 | Sepsis of newborn due to streptococcus, group B              |
| P36.1 | Sepsis of newborn due to other and unspecified streptococci  |
| P36.2 | Sepsis of newborn due to Staphylococcus aureus               |
| P36.3 | Sepsis of newborn due to other and unspecified staphylococci |
| P36.4 | Sepsis of newborn due to Escherichia coli                    |
| P36.5 | Sepsis of newborn due to anaerobes                           |
| P36.8 | Other bacterial sepsis of newborn                            |
| P36.9 | Bacterial sepsis of newborn, unspecified                     |
| P37.0 | Congenital tuberculosis                                      |
| P37.2 | Neonatal (disseminated) listeriosis                          |
| P39.0 | Neonatal infective mastitis                                  |
| P39.2 | Intra-amniotic infection of fetus, not elsewhere classified  |
| P39.3 | Neonatal urinary tract infection                             |

#### Localised bacterial infections

|       |                                                                                                   |
|-------|---------------------------------------------------------------------------------------------------|
| A00*  | Cholera                                                                                           |
| A04   | Other bacterial intestinal infections                                                             |
| A04.0 | Enteropathogenic Escherichia coli infection                                                       |
| A04.1 | Enterotoxigenic Escherichia coli infection                                                        |
| A04.2 | Enteroinvasive Escherichia coli infection                                                         |
| A04.3 | Enterohaemorrhagic Escherichia coli infection                                                     |
| A04.4 | Other intestinal Escherichia coli infections                                                      |
| A04.5 | Campylobacter enteritis                                                                           |
| A04.6 | Enteritis due to Yersinia enterocolitica                                                          |
| A04.7 | Enterocolitis due to Clostridium difficile                                                        |
| A04.8 | Other specified bacterial intestinal infections                                                   |
| A04.9 | Bacterial intestinal infection, unspecified                                                       |
| A05   | Other bacterial foodborne intoxications, not elsewhere classified                                 |
| A05.0 | Foodborne staphylococcal intoxication                                                             |
| A05.1 | Botulism                                                                                          |
| A05.2 | Foodborne Clostridium perfringens [Clostridium welchii] intoxication                              |
| A05.3 | Foodborne Vibrio parahaemolyticus intoxication                                                    |
| A05.4 | Foodborne Bacillus cereus intoxication                                                            |
| A05.8 | Other specified bacterial foodborne intoxications                                                 |
| A05.9 | Bacterial foodborne intoxication, unspecified                                                     |
| A09*  | Other gastroenteritis and colitis of infectious and unspecified origin                            |
| A26   | Erysipeloid                                                                                       |
| A26.0 | Cutaneous erysipeloid                                                                             |
| A26.9 | Erysipeloid, unspecified                                                                          |
| A37*  | Whooping cough                                                                                    |
| A48.2 | Nonpneumonic Legionnaires disease [Pontiac fever]                                                 |
| A54.0 | Gonococcal infection of lower genitourinary tract without periurethral or accessory gland abscess |



|       |                                                                                      |
|-------|--------------------------------------------------------------------------------------|
| A54.3 | Gonococcal infection of eye                                                          |
| A54.5 | Gonococcal pharyngitis                                                               |
| A54.6 | Gonococcal infection of anus and rectum                                              |
| A56.0 | Chlamydial infection of lower genitourinary tract                                    |
| A56.3 | Chlamydial infection of anus and rectum                                              |
| A56.4 | Chlamydial infection of pharynx                                                      |
| A57*  | Chancroid                                                                            |
| A58*  | Granuloma inguinale                                                                  |
| A64*  | Unspecified sexually transmitted disease                                             |
| A71*  | Trachoma                                                                             |
| A74.0 | Chlamydial conjunctivitis                                                            |
| B98.0 | Helicobacter pylori [H.pylori] as the cause of diseases classified to other chapters |
| H00*  | Hordeolum and chalazion                                                              |
| H01.0 | Blepharitis                                                                          |
| H10.0 | Mucopurulent conjunctivitis                                                          |
| H10.5 | Blepharoconjunctivitis                                                               |
| H60.3 | Other infective otitis externa                                                       |
| H66.0 | Acute suppurative otitis media                                                       |
| H67.0 | Otitis media in bacterial diseases classified elsewhere                              |
| J01.0 | Acute maxillary sinusitis                                                            |
| J02   | Acute pharyngitis                                                                    |
| J02.0 | Streptococcal pharyngitis                                                            |
| J02.8 | Acute pharyngitis due to other specified organisms                                   |
| J02.9 | Acute pharyngitis, unspecified                                                       |
| J03   | Acute tonsillitis                                                                    |
| J03.0 | Streptococcal tonsillitis                                                            |
| J03.8 | Acute tonsillitis due to other specified organisms                                   |
| J03.9 | Acute tonsillitis, unspecified                                                       |
| J04*  | Acute laryngitis and tracheitis                                                      |
| J20.0 | Acute bronchitis due to Mycoplasma pneumoniae                                        |
| J20.1 | Acute bronchitis due to Haemophilus influenzae                                       |
| J20.2 | Acute bronchitis due to streptococcus                                                |
| J22*  | Unspecified acute lower respiratory infection                                        |
| K02*  | Dental caries                                                                        |
| K04.4 | Acute apical periodontitis of pulpal origin                                          |
| K04.5 | Chronic apical periodontitis                                                         |
| K04.6 | Periapical abscess with sinus                                                        |
| K04.7 | Periapical abscess without sinus                                                     |
| K05.0 | Acute gingivitis                                                                     |
| K05.2 | Acute periodontitis                                                                  |
| K05.3 | Chronic periodontitis                                                                |
| K05.4 | Periodontosis                                                                        |
| K11.3 | Abscess of salivary gland                                                            |
| L00*  | Staphylococcal scalded skin syndrome                                                 |
| L01*  | Impetigo                                                                             |
| L02*  | Cutaneous abscess, furuncle and carbuncle                                            |
| L03*  | Cellulitis                                                                           |
| L04*  | Acute lymphadenitis                                                                  |

|       |                                                                                                                         |
|-------|-------------------------------------------------------------------------------------------------------------------------|
| L05*  | Pilonidal cyst                                                                                                          |
| L08*  | Other local infections of skin and subcutaneous tissue                                                                  |
| L70.1 | Acne conglobata                                                                                                         |
| N30.0 | Acute cystitis                                                                                                          |
| N39.0 | Urinary tract infection, site not specified                                                                             |
| N41.0 | Acute prostatitis                                                                                                       |
| N76.0 | Acute vaginitis                                                                                                         |
| O23.1 | Infections of bladder in pregnancy                                                                                      |
| O23.2 | Infections of urethra in pregnancy                                                                                      |
| O23.3 | Infections of other parts of urinary tract in pregnancy                                                                 |
| O23.4 | Unspecified infection of urinary tract in pregnancy                                                                     |
| O23.5 | Infections of the genital tract in pregnancy                                                                            |
| O23.9 | Other and unspecified genitourinary tract infection in pregnancy                                                        |
| O86*  | Other puerperal infections                                                                                              |
| O91.0 | Infection of nipple associated with childbirth                                                                          |
| O98.2 | Gonorrhoea complicating pregnancy, childbirth and the puerperium                                                        |
| O98.3 | Other infections with a predominantly sexual mode of transmission complicating pregnancy, childbirth and the puerperium |
| O98.8 | Other maternal infectious and parasitic diseases complicating pregnancy, childbirth and the puerperium                  |
| O98.9 | Unspecified maternal infectious or parasitic disease complicating pregnancy, childbirth and the puerperium              |
| P38*  | Omphalitis of newborn with or without mild haemorrhage                                                                  |
| P39.1 | Neonatal conjunctivitis and dacryocystitis                                                                              |
| P39.4 | Neonatal skin infection                                                                                                 |

#### Bacterial infections with sepsis

|       |                                              |
|-------|----------------------------------------------|
| A02.1 | Salmonella sepsis                            |
| A20.7 | Septicaemic plague                           |
| A21.7 | Generalized tularaemia                       |
| A22.7 | Anthrax sepsis                               |
| A32.7 | Listerial sepsis                             |
| A39.1 | Waterhouse-Friderichsen syndrome             |
| A39.2 | Acute meningococcaemia                       |
| A39.3 | Chronic meningococcaemia                     |
| A39.4 | Meningococcaemia, unspecified                |
| A40   | Streptococcal sepsis                         |
| A40.0 | Sepsis due to streptococcus, group A         |
| A40.1 | Sepsis due to streptococcus, group B         |
| A40.2 | Sepsis due to streptococcus, group D         |
| A40.3 | Sepsis due to Streptococcus pneumoniae       |
| A40.8 | Other streptococcal sepsis                   |
| A40.9 | Streptococcal sepsis, unspecified            |
| A41   | Other sepsis                                 |
| A41.0 | Sepsis due to Staphylococcus aureus          |
| A41.1 | Sepsis due to other specified staphylococcus |
| A41.2 | Sepsis due to unspecified staphylococcus     |
| A41.3 | Sepsis due to Haemophilus influenzae         |

|       |                                                              |
|-------|--------------------------------------------------------------|
| A41.4 | Sepsis due to anaerobes                                      |
| A41.5 | Sepsis due to other Gram-negative organisms                  |
| A41.8 | Other specified sepsis                                       |
| A41.9 | Sepsis, unspecified                                          |
| A42.7 | Actinomycotic sepsis                                         |
| A44.0 | Systemic bartonellosis                                       |
| A48.3 | Toxic shock syndrome                                         |
| A48.4 | Brazilian purpuric fever                                     |
| P36   | Bacterial sepsis of newborn                                  |
| P36.0 | Sepsis of newborn due to streptococcus, group B              |
| P36.1 | Sepsis of newborn due to other and unspecified streptococci  |
| P36.2 | Sepsis of newborn due to Staphylococcus aureus               |
| P36.3 | Sepsis of newborn due to other and unspecified staphylococci |
| P36.4 | Sepsis of newborn due to Escherichia coli                    |
| P36.5 | Sepsis of newborn due to anaerobes                           |
| P36.8 | Other bacterial sepsis of newborn                            |
| P36.9 | Bacterial sepsis of newborn, unspecified                     |
| P37.2 | Neonatal (disseminated) listeriosis                          |

#### Bacterial infections without sepsis

|       |                                                 |
|-------|-------------------------------------------------|
| A00*  | Cholera                                         |
| A01*  | Typhoid and paratyphoid fevers                  |
| A02   | Other salmonella infections                     |
| A02.0 | Salmonella enteritis                            |
| A02.2 | Localized salmonella infections                 |
| A02.8 | Other specified salmonella infections           |
| A02.9 | Salmonella infection, unspecified               |
| A03   | Shigellosis                                     |
| A03.0 | Shigellosis due to Shigella dysenteriae         |
| A03.1 | Shigellosis due to Shigella flexneri            |
| A03.2 | Shigellosis due to Shigella boydii              |
| A03.3 | Shigellosis due to Shigella sonnei              |
| A03.8 | Other shigellosis                               |
| A03.9 | Shigellosis, unspecified                        |
| A04   | Other bacterial intestinal infections           |
| A04.0 | Enteropathogenic Escherichia coli infection     |
| A04.1 | Enterotoxigenic Escherichia coli infection      |
| A04.2 | Enteroinvasive Escherichia coli infection       |
| A04.3 | Enterohaemorrhagic Escherichia coli infection   |
| A04.4 | Other intestinal Escherichia coli infections    |
| A04.5 | Campylobacter enteritis                         |
| A04.6 | Enteritis due to Yersinia enterocolitica        |
| A04.7 | Enterocolitis due to Clostridium difficile      |
| A04.8 | Other specified bacterial intestinal infections |
| A04.9 | Bacterial intestinal infection, unspecified     |

|       |                                                                             |
|-------|-----------------------------------------------------------------------------|
| A05   | Other bacterial foodborne intoxications, not elsewhere classified           |
| A05.0 | Foodborne staphylococcal intoxication                                       |
| A05.1 | Botulism                                                                    |
| A05.2 | Foodborne Clostridium perfringens [Clostridium welchii] intoxication        |
| A05.3 | Foodborne Vibrio parahaemolyticus intoxication                              |
| A05.4 | Foodborne Bacillus cereus intoxication                                      |
| A05.8 | Other specified bacterial foodborne intoxications                           |
| A05.9 | Bacterial foodborne intoxication, unspecified                               |
| A09*  | Other gastroenteritis and colitis of infectious and unspecified origin      |
| A15*  | Respiratory tuberculosis, bacteriologically and histologically confirmed    |
| A16*  | Respiratory tuberculosis, not confirmed bacteriologically or histologically |
| A17   | Tuberculosis of nervous system                                              |
| A17.0 | Tuberculous meningitis                                                      |
| A17.1 | Meningeal tuberculoma                                                       |
| A17.8 | Other tuberculosis of nervous system                                        |
| A17.9 | Tuberculosis of nervous system, unspecified                                 |
| A18*  | Tuberculosis of other organs                                                |
| A19*  | Miliary tuberculosis                                                        |
| A20   | Plague                                                                      |
| A20.0 | Bubonic plague                                                              |
| A20.1 | Cellulocutaneous plague                                                     |
| A20.2 | Pneumonic plague                                                            |
| A20.3 | Plague meningitis                                                           |
| A20.8 | Other forms of plague                                                       |
| A20.9 | Plague, unspecified                                                         |
| A21   | Tularaemia                                                                  |
| A21.0 | Ulceroglandular tularaemia                                                  |
| A21.1 | Oculoglandular tularaemia                                                   |
| A21.2 | Pulmonary tularaemia                                                        |
| A21.3 | Gastrointestinal tularaemia                                                 |
| A21.8 | Other forms of tularaemia                                                   |
| A21.9 | Tularaemia, unspecified                                                     |
| A22   | Anthrax                                                                     |
| A22.0 | Cutaneous anthrax                                                           |
| A22.1 | Pulmonary anthrax                                                           |
| A22.2 | Gastrointestinal anthrax                                                    |
| A22.8 | Other forms of anthrax                                                      |
| A22.9 | Anthrax, unspecified                                                        |
| A23   | Brucellosis                                                                 |
| A23.0 | Brucellosis due to Brucella melitensis                                      |
| A23.1 | Brucellosis due to Brucella abortus                                         |
| A23.2 | Brucellosis due to Brucella suis                                            |
| A23.3 | Brucellosis due to Brucella canis                                           |
| A23.8 | Other brucellosis                                                           |
| A23.9 | Brucellosis, unspecified                                                    |
| A24   | Glanders and melioidosis                                                    |
| A24.0 | Glanders                                                                    |
| A24.1 | Acute and fulminating melioidosis                                           |

|       |                                                                       |
|-------|-----------------------------------------------------------------------|
| A24.2 | Subacute and chronic melioidosis                                      |
| A24.3 | Other melioidosis                                                     |
| A25   | Rat-bite fevers                                                       |
| A25.0 | Spirillosis                                                           |
| A25.1 | Streptobacillosis                                                     |
| A25.9 | Rat-bite fever, unspecified                                           |
| A26   | Erysipeloid                                                           |
| A26.0 | Cutaneous erysipeloid                                                 |
| A26.7 | Erysipelothrix sepsis                                                 |
| A26.8 | Other forms of erysipeloid                                            |
| A26.9 | Erysipeloid, unspecified                                              |
| A27*  | Leptospirosis                                                         |
| A28   | Other zoonotic bacterial diseases, not elsewhere classified           |
| A28.0 | Pasteurellosis                                                        |
| A28.1 | Cat-scratch disease                                                   |
| A28.2 | Extraintestinal yersiniosis                                           |
| A28.8 | Other specified zoonotic bacterial diseases, not elsewhere classified |
| A28.9 | Zoonotic bacterial disease, unspecified                               |
| A30*  | Leprosy [Hansen disease]                                              |
| A31*  | Infection due to other mycobacteria                                   |
| A32   | Listeriosis                                                           |
| A32.0 | Cutaneous listeriosis                                                 |
| A32.1 | Listerial meningitis and meningoencephalitis                          |
| A32.8 | Other forms of listeriosis                                            |
| A32.9 | Listeriosis, unspecified                                              |
| A33*  | Tetanus neonatorum                                                    |
| A34*  | Obstetrical tetanus                                                   |
| A35*  | Other tetanus                                                         |
| A36*  | Diphtheria                                                            |
| A37*  | Whooping cough                                                        |
| A38*  | Scarlet fever                                                         |
| A39   | Meningococcal infection                                               |
| A39.0 | Meningococcal meningitis                                              |
| A39.5 | Meningococcal heart disease                                           |
| A39.8 | Other meningococcal infections                                        |
| A39.9 | Meningococcal infection, unspecified                                  |
| A42   | Actinomycosis                                                         |
| A42.0 | Pulmonary actinomycosis                                               |
| A42.1 | Abdominal actinomycosis                                               |
| A42.2 | Cervicofacial actinomycosis                                           |
| A42.8 | Other forms of actinomycosis                                          |
| A42.9 | Actinomycosis, unspecified                                            |
| A43   | Nocardiosis                                                           |
| A43.0 | Pulmonary nocardiosis                                                 |
| A43.1 | Cutaneous nocardiosis                                                 |
| A43.8 | Other forms of nocardiosis                                            |
| A44   | Bartonellosis                                                         |
| A44.1 | Cutaneous and mucocutaneous bartonellosis                             |

|       |                                                                                                   |
|-------|---------------------------------------------------------------------------------------------------|
| A44.8 | Other forms of bartonellosis                                                                      |
| A44.9 | Bartonellosis, unspecified                                                                        |
| A46*  | Erysipelas                                                                                        |
| A48.0 | Gas gangrene                                                                                      |
| A48.1 | Legionnaires disease                                                                              |
| A48.2 | Nonpneumonic Legionnaires disease [Pontiac fever]                                                 |
| A48.8 | Other specified bacterial diseases                                                                |
| A49   | Bacterial infection of unspecified site                                                           |
| A49.0 | Staphylococcal infection, unspecified site                                                        |
| A49.1 | Streptococcal infection, unspecified site                                                         |
| A49.2 | Haemophilus influenzae infection, unspecified site                                                |
| A49.3 | Mycoplasma infection, unspecified site                                                            |
| A49.8 | Other bacterial infections of unspecified site                                                    |
| A49.9 | Bacterial infection, unspecified                                                                  |
| A50   | Congenital syphilis                                                                               |
| A50.0 | Early congenital syphilis, symptomatic                                                            |
| A50.1 | Early congenital syphilis, latent                                                                 |
| A50.2 | Early congenital syphilis, unspecified                                                            |
| A50.3 | Late congenital syphilitic oculopathy                                                             |
| A50.4 | Late congenital neurosyphilis [juvenile neurosyphilis]                                            |
| A50.5 | Other late congenital syphilis, symptomatic                                                       |
| A50.6 | Late congenital syphilis, latent                                                                  |
| A50.7 | Late congenital syphilis, unspecified                                                             |
| A50.9 | Congenital syphilis, unspecified                                                                  |
| A51   | Early syphilis                                                                                    |
| A51.0 | Primary genital syphilis                                                                          |
| A51.1 | Primary anal syphilis                                                                             |
| A51.2 | Primary syphilis of other sites                                                                   |
| A51.3 | Secondary syphilis of skin and mucous membranes                                                   |
| A51.4 | Other secondary syphilis                                                                          |
| A51.5 | Early syphilis, latent                                                                            |
| A51.9 | Early syphilis, unspecified                                                                       |
| A52   | Late syphilis                                                                                     |
| A52.0 | Cardiovascular syphilis                                                                           |
| A52.1 | Symptomatic neurosyphilis                                                                         |
| A52.2 | Asymptomatic neurosyphilis                                                                        |
| A52.3 | Neurosyphilis, unspecified                                                                        |
| A52.7 | Other symptomatic late syphilis                                                                   |
| A52.8 | Late syphilis, latent                                                                             |
| A52.9 | Late syphilis, unspecified                                                                        |
| A53*  | Other and unspecified syphilis                                                                    |
| A54   | Gonococcal infection                                                                              |
| A54.0 | Gonococcal infection of lower genitourinary tract without periurethral or accessory gland abscess |
| A54.1 | Gonococcal infection of lower genitourinary tract with periurethral and accessory gland abscess   |
| A54.2 | Gonococcal pelviperitonitis and other gonococcal genitourinary infections                         |
| A54.3 | Gonococcal infection of eye                                                                       |
| A54.4 | Gonococcal infection of musculoskeletal system                                                    |
| A54.5 | Gonococcal pharyngitis                                                                            |

|       |                                                                        |
|-------|------------------------------------------------------------------------|
| A54.6 | Gonococcal infection of anus and rectum                                |
| A54.8 | Other gonococcal infections                                            |
| A54.9 | Gonococcal infection, unspecified                                      |
| A55*  | Chlamydial lymphogranuloma (venereum)                                  |
| A56.0 | Chlamydial infection of lower genitourinary tract                      |
| A56.1 | Chlamydial infection of pelviperitoneum and other genitourinary organs |
| A56.2 | Chlamydial infection of genitourinary tract, unspecified               |
| A56.3 | Chlamydial infection of anus and rectum                                |
| A56.4 | Chlamydial infection of pharynx                                        |
| A56.8 | Sexually transmitted chlamydial infection of other sites               |
| A57*  | Chancroid                                                              |
| A58*  | Granuloma inguinale                                                    |
| A64*  | Unspecified sexually transmitted disease                               |
| A65*  | Nonvenereal syphilis                                                   |
| A66*  | Yaws                                                                   |
| A67*  | Pinta [carate]                                                         |
| A68*  | Relapsing fevers                                                       |
| A69   | Other spirochaetal infections                                          |
| A69.0 | Necrotizing ulcerative stomatitis                                      |
| A69.1 | Other Vincent infections                                               |
| A69.2 | Lyme disease                                                           |
| A69.8 | Other specified spirochaetal infections                                |
| A69.9 | Spirochaetal infection, unspecified                                    |
| A70*  | Chlamydia psittaci infection                                           |
| A71*  | Trachoma                                                               |
| A74.0 | Chlamydial conjunctivitis                                              |
| A74.8 | Other chlamydial diseases                                              |
| A74.9 | Chlamydial infection, unspecified                                      |
| A75   | Typhus fever                                                           |
| A75.0 | Epidemic louse-borne typhus fever due to Rickettsia prowazekii         |
| A75.1 | Recrudescence typhus [Brill disease]                                   |
| A75.2 | Typhus fever due to Rickettsia typhi                                   |
| A75.3 | Typhus fever due to Rickettsia tsutsugamushi                           |
| A75.9 | Typhus fever, unspecified                                              |
| A77   | Spotted fever [tick-borne rickettsioses]                               |
| A77.0 | Spotted fever due to Rickettsia rickettsii                             |
| A77.1 | Spotted fever due to Rickettsia conorii                                |
| A77.2 | Spotted fever due to Rickettsia sibirica                               |
| A77.3 | Spotted fever due to Rickettsia australis                              |
| A77.8 | Other spotted fevers                                                   |
| A77.9 | Spotted fever, unspecified                                             |
| A78*  | Q fever                                                                |
| A79   | Other rickettsioses                                                    |
| A79.0 | Trench fever                                                           |
| A79.1 | Rickettsialpox due to Rickettsia akari                                 |
| A79.8 | Other specified rickettsioses                                          |
| A79.9 | Rickettsiosis, unspecified                                             |
| B47.1 | Actinomycetoma                                                         |

|       |                                                                                                |
|-------|------------------------------------------------------------------------------------------------|
| B95*  | Streptococcus and staphylococcus as the cause of diseases classified to other chapters         |
| B96.0 | Mycoplasma pneumoniae [M. pneumoniae] as the cause of diseases classified to other chapters    |
| B96.1 | Klebsiella pneumoniae [K. pneumoniae] as the cause of diseases classified to other chapters    |
| B96.2 | Escherichia coli [E. coli] as the cause of diseases classified to other chapters               |
| B96.3 | Haemophilus influenzae [H. influenzae] as the cause of diseases classified to other chapters   |
| B96.4 | Proteus (mirabilis)(morganii) as the cause of diseases classified to other chapters            |
| B96.5 | Pseudomonas (aeruginosa) as the cause of diseases classified to other chapters                 |
| B96.6 | Bacillus fragilis [B. fragilis] as the cause of diseases classified to other chapters          |
| B96.7 | Clostridium perfringens [C. perfringens] as the cause of diseases classified to other chapters |
| B96.8 | Other specified bacterial agents as the cause of diseases classified to other chapters         |
| B98.0 | Helicobacter pylori [H.pylori] as the cause of diseases classified to other chapters           |
| B98.1 | Vibrio vulnificus as the cause of diseases classified to other chapters                        |
| D73.3 | Abscess of spleen                                                                              |
| E32.1 | Abscess of thymus                                                                              |
| G00   | Bacterial meningitis, not elsewhere classified                                                 |
| G00.0 | Haemophilus meningitis                                                                         |
| G00.1 | Pneumococcal meningitis                                                                        |
| G00.2 | Streptococcal meningitis                                                                       |
| G00.3 | Staphylococcal meningitis                                                                      |
| G00.8 | Other bacterial meningitis                                                                     |
| G00.9 | Bacterial meningitis, unspecified                                                              |
| G01*  | Meningitis in bacterial diseases classified elsewhere                                          |
| G04.2 | Bacterial meningoencephalitis and meningomyelitis, not elsewhere classified                    |
| G05.0 | Encephalitis, myelitis and encephalomyelitis in bacterial diseases classified elsewhere        |
| G06*  | Intracranial and intraspinal abscess and granuloma                                             |
| H00*  | Hordeolum and chalazion                                                                        |
| H01.0 | Blepharitis                                                                                    |
| H05.0 | Acute inflammation of orbit                                                                    |
| H10.0 | Mucopurulent conjunctivitis                                                                    |
| H10.5 | Blepharoconjunctivitis                                                                         |
| H44.0 | Purulent endophthalmitis                                                                       |
| H60.0 | Abscess of external ear                                                                        |
| H60.1 | Cellulitis of external ear                                                                     |
| H60.2 | Malignant otitis externa                                                                       |
| H60.3 | Other infective otitis externa                                                                 |
| H62.0 | Otitis externa in bacterial diseases classified elsewhere                                      |
| H66.0 | Acute suppurative otitis media                                                                 |
| H67.0 | Otitis media in bacterial diseases classified elsewhere                                        |
| H70.0 | Acute mastoiditis                                                                              |
| I32.0 | Pericarditis in bacterial diseases classified elsewhere                                        |
| I33.0 | Acute and subacute infective endocarditis                                                      |
| I41.0 | Myocarditis in bacterial diseases classified elsewhere                                         |
| I52.0 | Other heart disorders in bacterial diseases classified elsewhere                               |
| J01.0 | Acute maxillary sinusitis                                                                      |
| J02   | Acute pharyngitis                                                                              |
| J02.0 | Streptococcal pharyngitis                                                                      |
| J02.8 | Acute pharyngitis due to other specified organisms                                             |
| J02.9 | Acute pharyngitis, unspecified                                                                 |



|       |                                                                       |
|-------|-----------------------------------------------------------------------|
| J03   | Acute tonsillitis                                                     |
| J03.0 | Streptococcal tonsillitis                                             |
| J03.8 | Acute tonsillitis due to other specified organisms                    |
| J03.9 | Acute tonsillitis, unspecified                                        |
| J04*  | Acute laryngitis and tracheitis                                       |
| J05.1 | Acute epiglottitis                                                    |
| J13*  | Pneumonia due to Streptococcus pneumoniae                             |
| J14*  | Pneumonia due to Haemophilus influenzae                               |
| J15   | Bacterial pneumonia, not elsewhere classified                         |
| J15.0 | Pneumonia due to Klebsiella pneumoniae                                |
| J15.1 | Pneumonia due to Pseudomonas                                          |
| J15.2 | Pneumonia due to staphylococcus                                       |
| J15.3 | Pneumonia due to streptococcus, group B                               |
| J15.4 | Pneumonia due to other streptococci                                   |
| J15.5 | Pneumonia due to Escherichia coli                                     |
| J15.6 | Pneumonia due to other aerobic Gram-negative bacteria                 |
| J15.7 | Pneumonia due to Mycoplasma pneumoniae                                |
| J15.8 | Other bacterial pneumonia                                             |
| J15.9 | Bacterial pneumonia, unspecified                                      |
| J16   | Pneumonia due to other infectious organisms, not elsewhere classified |
| J16.0 | Chlamydial pneumonia                                                  |
| J16.8 | Pneumonia due to other specified infectious organisms                 |
| J17.0 | Pneumonia in bacterial diseases classified elsewhere                  |
| J17.8 | Pneumonia in other diseases classified elsewhere                      |
| J18*  | Pneumonia, organism unspecified                                       |
| J20.0 | Acute bronchitis due to Mycoplasma pneumoniae                         |
| J20.1 | Acute bronchitis due to Haemophilus influenzae                        |
| J20.2 | Acute bronchitis due to streptococcus                                 |
| J22*  | Unspecified acute lower respiratory infection                         |
| J36*  | Peritonsillar abscess                                                 |
| J39.0 | Retropharyngeal and parapharyngeal abscess                            |
| J39.1 | Other abscess of pharynx                                              |
| J85.1 | Abscess of lung with pneumonia                                        |
| J85.2 | Abscess of lung without pneumonia                                     |
| J85.3 | Abscess of mediastinum                                                |
| J86*  | Pyothorax                                                             |
| K02*  | Dental caries                                                         |
| K04.4 | Acute apical periodontitis of pulpal origin                           |
| K04.5 | Chronic apical periodontitis                                          |
| K04.6 | Periapical abscess with sinus                                         |
| K04.7 | Periapical abscess without sinus                                      |
| K05.0 | Acute gingivitis                                                      |
| K05.2 | Acute periodontitis                                                   |
| K05.3 | Chronic periodontitis                                                 |
| K05.4 | Periodontosis                                                         |
| K11.3 | Abscess of salivary gland                                             |
| K12.2 | Cellulitis and abscess of mouth                                       |
| K23.0 | Tuberculous oesophagitis                                              |

|       |                                                                                     |
|-------|-------------------------------------------------------------------------------------|
| K35*  | Acute appendicitis                                                                  |
| K57.0 | Diverticular disease of small intestine with perforation and abscess                |
| K57.2 | Diverticular disease of large intestine with perforation and abscess                |
| K57.4 | Diverticular disease of both small and large intestine with perforation and abscess |
| K57.8 | Diverticular disease of intestine, part unspecified, with perforation and abscess   |
| K61*  | Abscess of anal and rectal regions                                                  |
| K63.0 | Abscess of intestine                                                                |
| K65.0 | Acute peritonitis                                                                   |
| K67.0 | Chlamydial peritonitis                                                              |
| K67.1 | Gonococcal peritonitis                                                              |
| K67.2 | Syphilitic peritonitis                                                              |
| K67.3 | Tuberculous peritonitis                                                             |
| K75.0 | Abscess of liver                                                                    |
| L00*  | Staphylococcal scalded skin syndrome                                                |
| L01*  | Impetigo                                                                            |
| L02*  | Cutaneous abscess, furuncle and carbuncle                                           |
| L03*  | Cellulitis                                                                          |
| L04*  | Acute lymphadenitis                                                                 |
| L05*  | Pilonidal cyst                                                                      |
| L08*  | Other local infections of skin and subcutaneous tissue                              |
| L70.1 | Acne conglobata                                                                     |
| M00   | Pyogenic arthritis                                                                  |
| M00.0 | Staphylococcal arthritis and polyarthritis                                          |
| M00.1 | Pneumococcal arthritis and polyarthritis                                            |
| M00.2 | Other streptococcal arthritis and polyarthritis                                     |
| M00.8 | Arthritis and polyarthritis due to other specified bacterial agents                 |
| M00.9 | Pyogenic arthritis, unspecified                                                     |
| M01.0 | Meningococcal arthritis                                                             |
| M01.1 | Tuberculous arthritis                                                               |
| M01.2 | Arthritis in Lyme disease                                                           |
| M01.3 | Arthritis in other bacterial diseases classified elsewhere                          |
| M46.2 | Osteomyelitis of vertebra                                                           |
| M46.3 | Infection of intervertebral disc (pyogenic)                                         |
| M46.5 | Other infective spondylopathies                                                     |
| M49.0 | Tuberculosis of spine                                                               |
| M49.1 | Brucella spondylitis                                                                |
| M49.2 | Enterobacterial spondylitis                                                         |
| M63.0 | Myositis in bacterial diseases classified elsewhere                                 |
| M65.0 | Abscess of tendon sheath                                                            |
| M65.1 | Other infective (teno)synovitis                                                     |
| M71.0 | Abscess of bursa                                                                    |
| M71.1 | Other infective bursitis                                                            |
| M72.6 | Necrotizing fasciitis                                                               |
| M73.0 | Gonococcal bursitis                                                                 |
| M73.1 | Syphilitic bursitis                                                                 |
| M86*  | Osteomyelitis                                                                       |
| M86.0 | Acute haematogenous osteomyelitis                                                   |
| M86.1 | Other acute osteomyelitis                                                           |

|       |                                                                                                    |
|-------|----------------------------------------------------------------------------------------------------|
| M86.2 | Subacute osteomyelitis                                                                             |
| M86.3 | Chronic multifocal osteomyelitis                                                                   |
| M86.4 | Chronic osteomyelitis with draining sinus                                                          |
| M86.5 | Other chronic haematogenous osteomyelitis                                                          |
| M86.6 | Other chronic osteomyelitis                                                                        |
| M86.8 | Other osteomyelitis                                                                                |
| M86.9 | Osteomyelitis, unspecified                                                                         |
| N10*  | Acute tubulo-interstitial nephritis                                                                |
| N13.6 | Pyonephrosis                                                                                       |
| N15.1 | Renal and perinephric abscess                                                                      |
| N29.0 | Late syphilis of kidney                                                                            |
| N30.0 | Acute cystitis                                                                                     |
| N34.0 | Urethral abscess                                                                                   |
| N39.0 | Urinary tract infection, site not specified                                                        |
| N41.0 | Acute prostatitis                                                                                  |
| N41.2 | Abscess of prostate                                                                                |
| N45*  | Orchitis and epididymitis                                                                          |
| N61*  | Inflammatory disorders of breast                                                                   |
| N70.0 | Acute salpingitis and oophoritis                                                                   |
| N71.0 | Acute inflammatory disease of uterus                                                               |
| N73.0 | Acute parametritis and pelvic cellulitis                                                           |
| N73.3 | Female acute pelvic peritonitis                                                                    |
| N74.0 | Tuberculous infection of cervix uteri                                                              |
| N74.1 | Female tuberculous pelvic inflammatory disease                                                     |
| N74.2 | Female syphilitic pelvic inflammatory disease                                                      |
| N74.3 | Female gonococcal pelvic inflammatory disease                                                      |
| N74.4 | Female chlamydial pelvic inflammatory disease                                                      |
| N75.1 | Abscess of Bartholin gland                                                                         |
| N76.0 | Acute vaginitis                                                                                    |
| N76.4 | Abscess of vulva                                                                                   |
| O03.0 | Spontaneous abortion: Incomplete, complicated by genital tract and pelvic infection                |
| O03.5 | Spontaneous abortion: Complete or unspecified, complicated by genital tract and pelvic infection   |
| O04.0 | Medical abortion: Incomplete, complicated by genital tract and pelvic infection                    |
| O04.5 | Medical abortion: Complete or unspecified, complicated by genital tract and pelvic infection       |
| O05.0 | Other abortion: Incomplete, complicated by genital tract and pelvic infection                      |
| O05.5 | Other abortion: Complete or unspecified, complicated by genital tract and pelvic infection         |
| O06.0 | Unspecified abortion: Incomplete, complicated by genital tract and pelvic infection                |
| O06.5 | Unspecified abortion: Complete or unspecified, complicated by genital tract and pelvic infection   |
| O07.0 | Failed medical abortion, complicated by genital tract and pelvic infection                         |
| O07.5 | Other and unspecified failed attempted abortion, complicated by genital tract and pelvic infection |
| O08.0 | Genital tract and pelvic infection following abortion and ectopic and molar pregnancy              |
| O23.0 | Infections of kidney in pregnancy                                                                  |
| O23.1 | Infections of bladder in pregnancy                                                                 |
| O23.2 | Infections of urethra in pregnancy                                                                 |
| O23.3 | Infections of other parts of urinary tract in pregnancy                                            |
| O23.4 | Unspecified infection of urinary tract in pregnancy                                                |
| O23.5 | Infections of the genital tract in pregnancy                                                       |
| O23.9 | Other and unspecified genitourinary tract infection in pregnancy                                   |

|       |                                                                                                                         |
|-------|-------------------------------------------------------------------------------------------------------------------------|
| O75.3 | Other infection during labour                                                                                           |
| O85*  | Puerperal sepsis                                                                                                        |
| O86*  | Other puerperal infections                                                                                              |
| O91.0 | Infection of nipple associated with childbirth                                                                          |
| O91.1 | Abscess of breast associated with childbirth                                                                            |
| O98.0 | Tuberculosis complicating pregnancy, childbirth and the puerperium                                                      |
| O98.1 | Syphilis complicating pregnancy, childbirth and the puerperium                                                          |
| O98.2 | Gonorrhoea complicating pregnancy, childbirth and the puerperium                                                        |
| O98.3 | Other infections with a predominantly sexual mode of transmission complicating pregnancy, childbirth and the puerperium |
| O98.8 | Other maternal infectious and parasitic diseases complicating pregnancy, childbirth and the puerperium                  |
| O98.9 | Unspecified maternal infectious or parasitic disease complicating pregnancy, childbirth and the puerperium              |
| P23   | Congenital pneumonia                                                                                                    |
| P23.1 | Congenital pneumonia due to Chlamydia                                                                                   |
| P23.2 | Congenital pneumonia due to staphylococcus                                                                              |
| P23.3 | Congenital pneumonia due to streptococcus, group B                                                                      |
| P23.4 | Congenital pneumonia due to Escherichia coli                                                                            |
| P23.5 | Congenital pneumonia due to Pseudomonas                                                                                 |
| P23.6 | Congenital pneumonia due to other bacterial agents                                                                      |
| P23.9 | Congenital pneumonia, unspecified                                                                                       |
| P37.0 | Congenital tuberculosis                                                                                                 |
| P38*  | Omphalitis of newborn with or without mild haemorrhage                                                                  |
| P39.0 | Neonatal infective mastitis                                                                                             |
| P39.1 | Neonatal conjunctivitis and dacryocystitis                                                                              |
| P39.2 | Intra-amniotic infection of fetus, not elsewhere classified                                                             |
| P39.3 | Neonatal urinary tract infection                                                                                        |
| P39.4 | Neonatal skin infection                                                                                                 |

#### **Intracellular bacterial infections**

|       |                                           |
|-------|-------------------------------------------|
| A01*  | Typhoid and paratyphoid fevers            |
| A02   | Other salmonella infections               |
| A02.0 | Salmonella enteritis                      |
| A02.1 | Salmonella sepsis                         |
| A02.2 | Localized salmonella infections           |
| A02.8 | Other specified salmonella infections     |
| A02.9 | Salmonella infection, unspecified         |
| A03   | Shigellosis                               |
| A03.0 | Shigellosis due to Shigella dysenteriae   |
| A03.1 | Shigellosis due to Shigella flexneri      |
| A03.2 | Shigellosis due to Shigella boydii        |
| A03.3 | Shigellosis due to Shigella sonnei        |
| A03.8 | Other shigellosis                         |
| A03.9 | Shigellosis, unspecified                  |
| A04.2 | Enteroinvasive Escherichia coli infection |
| A04.5 | Campylobacter enteritis                   |
| A04.6 | Enteritis due to Yersinia enterocolitica  |

|       |                                                                             |
|-------|-----------------------------------------------------------------------------|
| A15*  | Respiratory tuberculosis, bacteriologically and histologically confirmed    |
| A16*  | Respiratory tuberculosis, not confirmed bacteriologically or histologically |
| A17   | Tuberculosis of nervous system                                              |
| A17.0 | Tuberculous meningitis                                                      |
| A17.1 | Meningeal tuberculoma                                                       |
| A17.8 | Other tuberculosis of nervous system                                        |
| A17.9 | Tuberculosis of nervous system, unspecified                                 |
| A18*  | Tuberculosis of other organs                                                |
| A19*  | Miliary tuberculosis                                                        |
| A20   | Plague                                                                      |
| A20.0 | Bubonic plague                                                              |
| A20.1 | Cellulocutaneous plague                                                     |
| A20.2 | Pneumonic plague                                                            |
| A20.3 | Plague meningitis                                                           |
| A20.7 | Septicaemic plague                                                          |
| A20.8 | Other forms of plague                                                       |
| A20.9 | Plague, unspecified                                                         |
| A21   | Tularaemia                                                                  |
| A21.0 | Ulceroglandular tularaemia                                                  |
| A21.1 | Oculoglandular tularaemia                                                   |
| A21.2 | Pulmonary tularaemia                                                        |
| A21.3 | Gastrointestinal tularaemia                                                 |
| A21.7 | Generalized tularaemia                                                      |
| A21.8 | Other forms of tularaemia                                                   |
| A21.9 | Tularaemia, unspecified                                                     |
| A23   | Brucellosis                                                                 |
| A23.0 | Brucellosis due to <i>Brucella melitensis</i>                               |
| A23.1 | Brucellosis due to <i>Brucella abortus</i>                                  |
| A23.2 | Brucellosis due to <i>Brucella suis</i>                                     |
| A23.3 | Brucellosis due to <i>Brucella canis</i>                                    |
| A23.8 | Other brucellosis                                                           |
| A23.9 | Brucellosis, unspecified                                                    |
| A24   | Glanders and melioidosis                                                    |
| A24.0 | Glanders                                                                    |
| A24.1 | Acute and fulminating melioidosis                                           |
| A24.2 | Subacute and chronic melioidosis                                            |
| A24.3 | Other melioidosis                                                           |
| A26   | Erysipeloid                                                                 |
| A26.0 | Cutaneous erysipeloid                                                       |
| A26.7 | Erysipelothrix sepsis                                                       |
| A26.8 | Other forms of erysipeloid                                                  |
| A26.9 | Erysipeloid, unspecified                                                    |
| A28.1 | Cat-scratch disease                                                         |
| A28.2 | Extraintestinal yersiniosis                                                 |
| A30*  | Leprosy [Hansen disease]                                                    |
| A31*  | Infection due to other mycobacteria                                         |
| A32   | Listeriosis                                                                 |
| A32.0 | Cutaneous listeriosis                                                       |

|       |                                                                        |
|-------|------------------------------------------------------------------------|
| A32.1 | Listerial meningitis and meningoencephalitis                           |
| A32.7 | Listerial sepsis                                                       |
| A32.8 | Other forms of listeriosis                                             |
| A32.9 | Listeriosis, unspecified                                               |
| A43   | Nocardiosis                                                            |
| A43.0 | Pulmonary nocardiosis                                                  |
| A43.1 | Cutaneous nocardiosis                                                  |
| A43.8 | Other forms of nocardiosis                                             |
| A44   | Bartonellosis                                                          |
| A44.0 | Systemic bartonellosis                                                 |
| A44.1 | Cutaneous and mucocutaneous bartonellosis                              |
| A44.8 | Other forms of bartonellosis                                           |
| A44.9 | Bartonellosis, unspecified                                             |
| A48.1 | Legionnaires disease                                                   |
| A48.2 | Nonpneumonic Legionnaires disease [Pontiac fever]                      |
| A49.3 | Mycoplasma infection, unspecified site                                 |
| A55*  | Chlamydial lymphogranuloma (venereum)                                  |
| A56.0 | Chlamydial infection of lower genitourinary tract                      |
| A56.1 | Chlamydial infection of pelviperitoneum and other genitourinary organs |
| A56.2 | Chlamydial infection of genitourinary tract, unspecified               |
| A56.3 | Chlamydial infection of anus and rectum                                |
| A56.4 | Chlamydial infection of pharynx                                        |
| A56.8 | Sexually transmitted chlamydial infection of other sites               |
| A58*  | Granuloma inguinale                                                    |
| A70*  | Chlamydia psittaci infection                                           |
| A71*  | Trachoma                                                               |
| A74.0 | Chlamydial conjunctivitis                                              |
| A74.8 | Other chlamydial diseases                                              |
| A74.9 | Chlamydial infection, unspecified                                      |
| A75   | Typhus fever                                                           |
| A75.0 | Epidemic louse-borne typhus fever due to Rickettsia prowazekii         |
| A75.1 | Recrudescence typhus [Brill disease]                                   |
| A75.2 | Typhus fever due to Rickettsia typhi                                   |
| A75.3 | Typhus fever due to Rickettsia tsutsugamushi                           |
| A75.9 | Typhus fever, unspecified                                              |
| A77   | Spotted fever [tick-borne rickettsioses]                               |
| A77.0 | Spotted fever due to Rickettsia rickettsii                             |
| A77.1 | Spotted fever due to Rickettsia conorii                                |
| A77.2 | Spotted fever due to Rickettsia sibirica                               |
| A77.3 | Spotted fever due to Rickettsia australis                              |
| A77.8 | Other spotted fevers                                                   |
| A77.9 | Spotted fever, unspecified                                             |
| A78*  | Q fever                                                                |
| A79   | Other rickettsioses                                                    |
| A79.0 | Trench fever                                                           |
| A79.1 | Rickettsialpox due to Rickettsia akari                                 |
| A79.8 | Other specified rickettsioses                                          |
| A79.9 | Rickettsiosis, unspecified                                             |

|       |                                                                                             |
|-------|---------------------------------------------------------------------------------------------|
| B96.0 | Mycoplasma pneumoniae [M. pneumoniae] as the cause of diseases classified to other chapters |
| J15.7 | Pneumonia due to Mycoplasma pneumoniae                                                      |
| J16.0 | Chlamydial pneumonia                                                                        |
| J20.0 | Acute bronchitis due to Mycoplasma pneumoniae                                               |
| K23.0 | Tuberculous oesophagitis                                                                    |
| K67.0 | Chlamydial peritonitis                                                                      |
| K67.3 | Tuberculous peritonitis                                                                     |
| M01.1 | Tuberculous arthritis                                                                       |
| M49.0 | Tuberculosis of spine                                                                       |
| M49.1 | Brucella spondylitis                                                                        |
| N74.0 | Tuberculous infection of cervix uteri                                                       |
| N74.1 | Female tuberculous pelvic inflammatory disease                                              |
| N74.4 | Female chlamydial pelvic inflammatory disease                                               |
| O98.0 | Tuberculosis complicating pregnancy, childbirth and the puerperium                          |
| P23.1 | Congenital pneumonia due to Chlamydia                                                       |
| P37.0 | Congenital tuberculosis                                                                     |
| P37.2 | Neonatal (disseminated) listeriosis                                                         |

#### Extracellular bacterial infections

|       |                                                                      |
|-------|----------------------------------------------------------------------|
| A00*  | Cholera                                                              |
| A04.0 | Enteropathogenic Escherichia coli infection                          |
| A04.1 | Enterotoxigenic Escherichia coli infection                           |
| A04.3 | Enterohaemorrhagic Escherichia coli infection                        |
| A04.4 | Other intestinal Escherichia coli infections                         |
| A04.7 | Enterocolitis due to Clostridium difficile                           |
| A05.0 | Foodborne staphylococcal intoxication                                |
| A05.1 | Botulism                                                             |
| A05.2 | Foodborne Clostridium perfringens [Clostridium welchii] intoxication |
| A05.3 | Foodborne Vibrio parahaemolyticus intoxication                       |
| A05.4 | Foodborne Bacillus cereus intoxication                               |
| A22   | Anthrax                                                              |
| A22.0 | Cutaneous anthrax                                                    |
| A22.1 | Pulmonary anthrax                                                    |
| A22.2 | Gastrointestinal anthrax                                             |
| A22.7 | Anthrax sepsis                                                       |
| A22.8 | Other forms of anthrax                                               |
| A22.9 | Anthrax, unspecified                                                 |
| A25   | Rat-bite fevers                                                      |
| A25.0 | Spirillosis                                                          |
| A25.1 | Streptobacillosis                                                    |
| A25.9 | Rat-bite fever, unspecified                                          |
| A27*  | Leptospirosis                                                        |
| A28.0 | Pasteurellosis                                                       |
| A33*  | Tetanus neonatorum                                                   |
| A34*  | Obstetrical tetanus                                                  |

|       |                                                        |
|-------|--------------------------------------------------------|
| A35*  | Other tetanus                                          |
| A36*  | Diphtheria                                             |
| A37*  | Whooping cough                                         |
| A38*  | Scarlet fever                                          |
| A39   | Meningococcal infection                                |
| A39.0 | Meningococcal meningitis                               |
| A39.1 | Waterhouse-Friderichsen syndrome                       |
| A39.2 | Acute meningococcaemia                                 |
| A39.3 | Chronic meningococcaemia                               |
| A39.4 | Meningococcaemia, unspecified                          |
| A39.5 | Meningococcal heart disease                            |
| A39.8 | Other meningococcal infections                         |
| A39.9 | Meningococcal infection, unspecified                   |
| A40   | Streptococcal sepsis                                   |
| A40.0 | Sepsis due to streptococcus, group A                   |
| A40.1 | Sepsis due to streptococcus, group B                   |
| A40.2 | Sepsis due to streptococcus, group D                   |
| A40.3 | Sepsis due to Streptococcus pneumoniae                 |
| A40.8 | Other streptococcal sepsis                             |
| A40.9 | Streptococcal sepsis, unspecified                      |
| A41.0 | Sepsis due to Staphylococcus aureus                    |
| A41.1 | Sepsis due to other specified staphylococcus           |
| A41.2 | Sepsis due to unspecified staphylococcus               |
| A41.3 | Sepsis due to Haemophilus influenzae                   |
| A48.0 | Gas gangrene                                           |
| A48.3 | Toxic shock syndrome                                   |
| A48.4 | Brazilian purpuric fever                               |
| A49.0 | Staphylococcal infection, unspecified site             |
| A49.2 | Haemophilus influenzae infection, unspecified site     |
| A50   | Congenital syphilis                                    |
| A50.0 | Early congenital syphilis, symptomatic                 |
| A50.1 | Early congenital syphilis, latent                      |
| A50.2 | Early congenital syphilis, unspecified                 |
| A50.3 | Late congenital syphilitic ophthalmopathy              |
| A50.4 | Late congenital neurosyphilis [juvenile neurosyphilis] |
| A50.5 | Other late congenital syphilis, symptomatic            |
| A50.6 | Late congenital syphilis, latent                       |
| A50.7 | Late congenital syphilis, unspecified                  |
| A50.9 | Congenital syphilis, unspecified                       |
| A51   | Early syphilis                                         |
| A51.0 | Primary genital syphilis                               |
| A51.1 | Primary anal syphilis                                  |
| A51.2 | Primary syphilis of other sites                        |
| A51.3 | Secondary syphilis of skin and mucous membranes        |
| A51.4 | Other secondary syphilis                               |
| A51.5 | Early syphilis, latent                                 |
| A51.9 | Early syphilis, unspecified                            |
| A52   | Late syphilis                                          |



|       |                                                                                                   |
|-------|---------------------------------------------------------------------------------------------------|
| A52.0 | Cardiovascular syphilis                                                                           |
| A52.1 | Symptomatic neurosyphilis                                                                         |
| A52.2 | Asymptomatic neurosyphilis                                                                        |
| A52.3 | Neurosyphilis, unspecified                                                                        |
| A52.7 | Other symptomatic late syphilis                                                                   |
| A52.8 | Late syphilis, latent                                                                             |
| A52.9 | Late syphilis, unspecified                                                                        |
| A53*  | Other and unspecified syphilis                                                                    |
| A54   | Gonococcal infection                                                                              |
| A54.0 | Gonococcal infection of lower genitourinary tract without periurethral or accessory gland abscess |
| A54.1 | Gonococcal infection of lower genitourinary tract with periurethral and accessory gland abscess   |
| A54.2 | Gonococcal pelviperitonitis and other gonococcal genitourinary infections                         |
| A54.3 | Gonococcal infection of eye                                                                       |
| A54.4 | Gonococcal infection of musculoskeletal system                                                    |
| A54.5 | Gonococcal pharyngitis                                                                            |
| A54.6 | Gonococcal infection of anus and rectum                                                           |
| A54.8 | Other gonococcal infections                                                                       |
| A54.9 | Gonococcal infection, unspecified                                                                 |
| A57*  | Chancroid                                                                                         |
| A65*  | Nonvenereal syphilis                                                                              |
| A66*  | Yaws                                                                                              |
| A67*  | Pinta [carate]                                                                                    |
| A68*  | Relapsing fevers                                                                                  |
| A69.2 | Lyme disease                                                                                      |
| A69.8 | Other specified spirochaetal infections                                                           |
| A69.9 | Spirochaetal infection, unspecified                                                               |
| B95*  | Streptococcus and staphylococcus as the cause of diseases classified to other chapters            |
| B96.1 | Klebsiella pneumoniae [K. pneumoniae] as the cause of diseases classified to other chapters       |
| B96.2 | Escherichia coli [E. coli] as the cause of diseases classified to other chapters                  |
| B96.3 | Haemophilus influenzae [H. influenzae] as the cause of diseases classified to other chapters      |
| B96.4 | Proteus (mirabilis)(morganii) as the cause of diseases classified to other chapters               |
| B96.5 | Pseudomonas (aeruginosa) as the cause of diseases classified to other chapters                    |
| B96.6 | Bacillus fragilis [B. fragilis] as the cause of diseases classified to other chapters             |
| B96.7 | Clostridium perfringens [C. perfringens] as the cause of diseases classified to other chapters    |
| B98.0 | Helicobacter pylori [H.pylori] as the cause of diseases classified to other chapters              |
| B98.1 | Vibrio vulnificus as the cause of diseases classified to other chapters                           |
| G00.0 | Haemophilus meningitis                                                                            |
| G00.1 | Pneumococcal meningitis                                                                           |
| G00.2 | Streptococcal meningitis                                                                          |
| G00.3 | Staphylococcal meningitis                                                                         |
| J02.0 | Streptococcal pharyngitis                                                                         |
| J03.0 | Streptococcal tonsillitis                                                                         |
| J13*  | Pneumonia due to Streptococcus pneumoniae                                                         |
| J14*  | Pneumonia due to Haemophilus influenzae                                                           |
| J15.0 | Pneumonia due to Klebsiella pneumoniae                                                            |
| J15.1 | Pneumonia due to Pseudomonas                                                                      |
| J15.2 | Pneumonia due to staphylococcus                                                                   |
| J15.3 | Pneumonia due to streptococcus, group B                                                           |

|       |                                                                  |
|-------|------------------------------------------------------------------|
| J15.4 | Pneumonia due to other streptococci                              |
| J15.5 | Pneumonia due to Escherichia coli                                |
| J20.1 | Acute bronchitis due to Haemophilus influenzae                   |
| J20.2 | Acute bronchitis due to streptococcus                            |
| K67.1 | Gonococcal peritonitis                                           |
| K67.2 | Syphilitic peritonitis                                           |
| L00*  | Staphylococcal scalded skin syndrome                             |
| L01*  | Impetigo                                                         |
| M00.0 | Staphylococcal arthritis and polyarthritis                       |
| M00.1 | Pneumococcal arthritis and polyarthritis                         |
| M00.2 | Other streptococcal arthritis and polyarthritis                  |
| M01.0 | Meningococcal arthritis                                          |
| M01.2 | Arthritis in Lyme disease                                        |
| M73.0 | Gonococcal bursitis                                              |
| M73.1 | Syphilitic bursitis                                              |
| N74.2 | Female syphilitic pelvic inflammatory disease                    |
| N74.3 | Female gonococcal pelvic inflammatory disease                    |
| O98.1 | Syphilis complicating pregnancy, childbirth and the puerperium   |
| O98.2 | Gonorrhoea complicating pregnancy, childbirth and the puerperium |
| P23.2 | Congenital pneumonia due to staphylococcus                       |
| P23.3 | Congenital pneumonia due to streptococcus, group B               |
| P23.4 | Congenital pneumonia due to Escherichia coli                     |
| P23.5 | Congenital pneumonia due to Pseudomonas                          |
| P36.0 | Sepsis of newborn due to streptococcus, group B                  |
| P36.1 | Sepsis of newborn due to other and unspecified streptococci      |
| P36.2 | Sepsis of newborn due to Staphylococcus aureus                   |
| P36.3 | Sepsis of newborn due to other and unspecified staphylococci     |
| P36.4 | Sepsis of newborn due to Escherichia coli                        |

#### Gram-positive bacterial infections

|       |                                                                      |
|-------|----------------------------------------------------------------------|
| A04.7 | Enterocolitis due to Clostridium difficile                           |
| A05.0 | Foodborne staphylococcal intoxication                                |
| A05.1 | Botulism                                                             |
| A05.2 | Foodborne Clostridium perfringens [Clostridium welchii] intoxication |
| A05.4 | Foodborne Bacillus cereus intoxication                               |
| A22   | Anthrax                                                              |
| A22.0 | Cutaneous anthrax                                                    |
| A22.1 | Pulmonary anthrax                                                    |
| A22.2 | Gastrointestinal anthrax                                             |
| A22.7 | Anthrax sepsis                                                       |
| A22.8 | Other forms of anthrax                                               |
| A22.9 | Anthrax, unspecified                                                 |
| A26   | Erysipeloid                                                          |
| A26.0 | Cutaneous erysipeloid                                                |
| A26.7 | Erysipelothrix sepsis                                                |

|       |                                                                                                |
|-------|------------------------------------------------------------------------------------------------|
| A26.8 | Other forms of erysipeloid                                                                     |
| A26.9 | Erysipeloid, unspecified                                                                       |
| A32   | Listeriosis                                                                                    |
| A32.0 | Cutaneous listeriosis                                                                          |
| A32.1 | Listerial meningitis and meningoencephalitis                                                   |
| A32.7 | Listerial sepsis                                                                               |
| A32.8 | Other forms of listeriosis                                                                     |
| A32.9 | Listeriosis, unspecified                                                                       |
| A33*  | Tetanus neonatorum                                                                             |
| A34*  | Obstetrical tetanus                                                                            |
| A35*  | Other tetanus                                                                                  |
| A36*  | Diphtheria                                                                                     |
| A38*  | Scarlet fever                                                                                  |
| A40   | Streptococcal sepsis                                                                           |
| A40.0 | Sepsis due to streptococcus, group A                                                           |
| A40.1 | Sepsis due to streptococcus, group B                                                           |
| A40.2 | Sepsis due to streptococcus, group D                                                           |
| A40.3 | Sepsis due to Streptococcus pneumoniae                                                         |
| A40.8 | Other streptococcal sepsis                                                                     |
| A40.9 | Streptococcal sepsis, unspecified                                                              |
| A41.0 | Sepsis due to Staphylococcus aureus                                                            |
| A41.1 | Sepsis due to other specified staphylococcus                                                   |
| A41.2 | Sepsis due to unspecified staphylococcus                                                       |
| A42   | Actinomycosis                                                                                  |
| A42.0 | Pulmonary actinomycosis                                                                        |
| A42.1 | Abdominal actinomycosis                                                                        |
| A42.2 | Cervicofacial actinomycosis                                                                    |
| A42.7 | Actinomycotic sepsis                                                                           |
| A42.8 | Other forms of actinomycosis                                                                   |
| A42.9 | Actinomycosis, unspecified                                                                     |
| A43   | Nocardiosis                                                                                    |
| A43.0 | Pulmonary nocardiosis                                                                          |
| A43.1 | Cutaneous nocardiosis                                                                          |
| A43.8 | Other forms of nocardiosis                                                                     |
| A48.0 | Gas gangrene                                                                                   |
| A48.3 | Toxic shock syndrome                                                                           |
| A49.0 | Staphylococcal infection, unspecified site                                                     |
| A49.1 | Streptococcal infection, unspecified site                                                      |
| B47.1 | Actinomycetoma                                                                                 |
| B95*  | Streptococcus and staphylococcus as the cause of diseases classified to other chapters         |
| B96.7 | Clostridium perfringens [C. perfringens] as the cause of diseases classified to other chapters |
| G00.1 | Pneumococcal meningitis                                                                        |
| G00.2 | Streptococcal meningitis                                                                       |
| G00.3 | Staphylococcal meningitis                                                                      |
| J02.0 | Streptococcal pharyngitis                                                                      |
| J03.0 | Streptococcal tonsillitis                                                                      |
| J13*  | Pneumonia due to Streptococcus pneumoniae                                                      |
| J15.2 | Pneumonia due to staphylococcus                                                                |

|       |                                                              |
|-------|--------------------------------------------------------------|
| J15.3 | Pneumonia due to streptococcus, group B                      |
| J15.4 | Pneumonia due to other streptococci                          |
| J20.2 | Acute bronchitis due to streptococcus                        |
| L00*  | Staphylococcal scalded skin syndrome                         |
| L01*  | Impetigo                                                     |
| M00.0 | Staphylococcal arthritis and polyarthritis                   |
| M00.1 | Pneumococcal arthritis and polyarthritis                     |
| M00.2 | Other streptococcal arthritis and polyarthritis              |
| P23.2 | Congenital pneumonia due to staphylococcus                   |
| P23.3 | Congenital pneumonia due to streptococcus, group B           |
| P36.0 | Sepsis of newborn due to streptococcus, group B              |
| P36.1 | Sepsis of newborn due to other and unspecified streptococci  |
| P36.2 | Sepsis of newborn due to Staphylococcus aureus               |
| P36.3 | Sepsis of newborn due to other and unspecified staphylococci |
| P37.2 | Neonatal (disseminated) listeriosis                          |

### Gram-negative bacterial infections

|       |                                                |
|-------|------------------------------------------------|
| A00*  | Cholera                                        |
| A01*  | Typhoid and paratyphoid fevers                 |
| A02   | Other salmonella infections                    |
| A02.0 | Salmonella enteritis                           |
| A02.1 | Salmonella sepsis                              |
| A02.2 | Localized salmonella infections                |
| A02.8 | Other specified salmonella infections          |
| A02.9 | Salmonella infection, unspecified              |
| A03   | Shigellosis                                    |
| A03.0 | Shigellosis due to Shigella dysenteriae        |
| A03.1 | Shigellosis due to Shigella flexneri           |
| A03.2 | Shigellosis due to Shigella boydii             |
| A03.3 | Shigellosis due to Shigella sonnei             |
| A03.8 | Other shigellosis                              |
| A03.9 | Shigellosis, unspecified                       |
| A04.0 | Enteropathogenic Escherichia coli infection    |
| A04.1 | Enterotoxigenic Escherichia coli infection     |
| A04.2 | Enteroinvasive Escherichia coli infection      |
| A04.3 | Enterohaemorrhagic Escherichia coli infection  |
| A04.4 | Other intestinal Escherichia coli infections   |
| A04.5 | Campylobacter enteritis                        |
| A04.6 | Enteritis due to Yersinia enterocolitica       |
| A05.3 | Foodborne Vibrio parahaemolyticus intoxication |
| A20   | Plague                                         |
| A20.0 | Bubonic plague                                 |
| A20.1 | Cellulocutaneous plague                        |
| A20.2 | Pneumonic plague                               |
| A20.3 | Plague meningitis                              |

|       |                                               |
|-------|-----------------------------------------------|
| A20.7 | Septicaemic plague                            |
| A20.8 | Other forms of plague                         |
| A20.9 | Plague, unspecified                           |
| A21   | Tularaemia                                    |
| A21.0 | Ulceroglandular tularaemia                    |
| A21.1 | Oculoglandular tularaemia                     |
| A21.2 | Pulmonary tularaemia                          |
| A21.3 | Gastrointestinal tularaemia                   |
| A21.7 | Generalized tularaemia                        |
| A21.8 | Other forms of tularaemia                     |
| A21.9 | Tularaemia, unspecified                       |
| A23   | Brucellosis                                   |
| A23.0 | Brucellosis due to <i>Brucella melitensis</i> |
| A23.1 | Brucellosis due to <i>Brucella abortus</i>    |
| A23.2 | Brucellosis due to <i>Brucella suis</i>       |
| A23.3 | Brucellosis due to <i>Brucella canis</i>      |
| A23.8 | Other brucellosis                             |
| A23.9 | Brucellosis, unspecified                      |
| A24   | Glanders and melioidosis                      |
| A24.0 | Glanders                                      |
| A24.1 | Acute and fulminating melioidosis             |
| A24.2 | Subacute and chronic melioidosis              |
| A24.3 | Other melioidosis                             |
| A25   | Rat-bite fevers                               |
| A25.0 | Spirillosis                                   |
| A25.1 | Streptobacillosis                             |
| A25.9 | Rat-bite fever, unspecified                   |
| A27*  | Leptospirosis                                 |
| A28.0 | Pasteurellosis                                |
| A28.1 | Cat-scratch disease                           |
| A28.2 | Extraintestinal yersiniosis                   |
| A37*  | Whooping cough                                |
| A39   | Meningococcal infection                       |
| A39.0 | Meningococcal meningitis                      |
| A39.1 | Waterhouse-Friderichsen syndrome              |
| A39.2 | Acute meningococcaemia                        |
| A39.3 | Chronic meningococcaemia                      |
| A39.4 | Meningococcaemia, unspecified                 |
| A39.5 | Meningococcal heart disease                   |
| A39.8 | Other meningococcal infections                |
| A39.9 | Meningococcal infection, unspecified          |
| A41.3 | Sepsis due to <i>Haemophilus influenzae</i>   |
| A41.5 | Sepsis due to other Gram-negative organisms   |
| A44   | Bartonellosis                                 |
| A44.0 | Systemic bartonellosis                        |
| A44.1 | Cutaneous and mucocutaneous bartonellosis     |
| A44.8 | Other forms of bartonellosis                  |
| A44.9 | Bartonellosis, unspecified                    |

|       |                                                                                                   |
|-------|---------------------------------------------------------------------------------------------------|
| A48.1 | Legionnaires disease                                                                              |
| A48.2 | Nonpneumonic Legionnaires disease [Pontiac fever]                                                 |
| A48.4 | Brazilian purpuric fever                                                                          |
| A49.2 | Haemophilus influenzae infection, unspecified site                                                |
| A50   | Congenital syphilis                                                                               |
| A50.0 | Early congenital syphilis, symptomatic                                                            |
| A50.1 | Early congenital syphilis, latent                                                                 |
| A50.2 | Early congenital syphilis, unspecified                                                            |
| A50.3 | Late congenital syphilitic oculopathy                                                             |
| A50.4 | Late congenital neurosyphilis [juvenile neurosyphilis]                                            |
| A50.5 | Other late congenital syphilis, symptomatic                                                       |
| A50.6 | Late congenital syphilis, latent                                                                  |
| A50.7 | Late congenital syphilis, unspecified                                                             |
| A50.9 | Congenital syphilis, unspecified                                                                  |
| A51   | Early syphilis                                                                                    |
| A51.0 | Primary genital syphilis                                                                          |
| A51.1 | Primary anal syphilis                                                                             |
| A51.2 | Primary syphilis of other sites                                                                   |
| A51.3 | Secondary syphilis of skin and mucous membranes                                                   |
| A51.4 | Other secondary syphilis                                                                          |
| A51.5 | Early syphilis, latent                                                                            |
| A51.9 | Early syphilis, unspecified                                                                       |
| A52   | Late syphilis                                                                                     |
| A52.0 | Cardiovascular syphilis                                                                           |
| A52.1 | Symptomatic neurosyphilis                                                                         |
| A52.2 | Asymptomatic neurosyphilis                                                                        |
| A52.3 | Neurosyphilis, unspecified                                                                        |
| A52.7 | Other symptomatic late syphilis                                                                   |
| A52.8 | Late syphilis, latent                                                                             |
| A52.9 | Late syphilis, unspecified                                                                        |
| A53*  | Other and unspecified syphilis                                                                    |
| A54   | Gonococcal infection                                                                              |
| A54.0 | Gonococcal infection of lower genitourinary tract without periurethral or accessory gland abscess |
| A54.1 | Gonococcal infection of lower genitourinary tract with periurethral and accessory gland abscess   |
| A54.2 | Gonococcal pelviperitonitis and other gonococcal genitourinary infections                         |
| A54.3 | Gonococcal infection of eye                                                                       |
| A54.4 | Gonococcal infection of musculoskeletal system                                                    |
| A54.5 | Gonococcal pharyngitis                                                                            |
| A54.6 | Gonococcal infection of anus and rectum                                                           |
| A54.8 | Other gonococcal infections                                                                       |
| A54.9 | Gonococcal infection, unspecified                                                                 |
| A55*  | Chlamydial lymphogranuloma (venereum)                                                             |
| A56.0 | Chlamydial infection of lower genitourinary tract                                                 |
| A56.1 | Chlamydial infection of pelviperitoneum and other genitourinary organs                            |
| A56.2 | Chlamydial infection of genitourinary tract, unspecified                                          |
| A56.3 | Chlamydial infection of anus and rectum                                                           |
| A56.4 | Chlamydial infection of pharynx                                                                   |
| A56.8 | Sexually transmitted chlamydial infection of other sites                                          |

|       |                                                                                                              |
|-------|--------------------------------------------------------------------------------------------------------------|
| A57*  | Chancroid                                                                                                    |
| A58*  | Granuloma inguinale                                                                                          |
| A65*  | Nonvenereal syphilis                                                                                         |
| A66*  | Yaws                                                                                                         |
| A67*  | Pinta [carate]                                                                                               |
| A68*  | Relapsing fevers                                                                                             |
| A69.2 | Lyme disease                                                                                                 |
| A69.8 | Other specified spirochaetal infections                                                                      |
| A69.9 | Spirochaetal infection, unspecified                                                                          |
| A70*  | Chlamydia psittaci infection                                                                                 |
| A71*  | Trachoma                                                                                                     |
| A74.0 | Chlamydial conjunctivitis                                                                                    |
| A74.8 | Other chlamydial diseases                                                                                    |
| A74.9 | Chlamydial infection, unspecified                                                                            |
| A75   | Typhus fever                                                                                                 |
| A75.0 | Epidemic louse-borne typhus fever due to <i>Rickettsia prowazekii</i>                                        |
| A75.1 | Recrudescient typhus [Brill disease]                                                                         |
| A75.2 | Typhus fever due to <i>Rickettsia typhi</i>                                                                  |
| A75.3 | Typhus fever due to <i>Rickettsia tsutsugamushi</i>                                                          |
| A75.9 | Typhus fever, unspecified                                                                                    |
| A77   | Spotted fever [tick-borne rickettsioses]                                                                     |
| A77.0 | Spotted fever due to <i>Rickettsia rickettsii</i>                                                            |
| A77.1 | Spotted fever due to <i>Rickettsia conorii</i>                                                               |
| A77.2 | Spotted fever due to <i>Rickettsia sibirica</i>                                                              |
| A77.3 | Spotted fever due to <i>Rickettsia australis</i>                                                             |
| A77.8 | Other spotted fevers                                                                                         |
| A77.9 | Spotted fever, unspecified                                                                                   |
| A78*  | Q fever                                                                                                      |
| A79   | Other rickettsioses                                                                                          |
| A79.0 | Trench fever                                                                                                 |
| A79.1 | Rickettsialpox due to <i>Rickettsia akari</i>                                                                |
| A79.8 | Other specified rickettsioses                                                                                |
| A79.9 | Rickettsiosis, unspecified                                                                                   |
| B96.1 | <i>Klebsiella pneumoniae</i> [ <i>K. pneumoniae</i> ] as the cause of diseases classified to other chapters  |
| B96.2 | <i>Escherichia coli</i> [ <i>E. coli</i> ] as the cause of diseases classified to other chapters             |
| B96.3 | <i>Haemophilus influenzae</i> [ <i>H. influenzae</i> ] as the cause of diseases classified to other chapters |
| B96.4 | <i>Proteus (mirabilis)(morganii)</i> as the cause of diseases classified to other chapters                   |
| B96.5 | <i>Pseudomonas (aeruginosa)</i> as the cause of diseases classified to other chapters                        |
| B96.6 | <i>Bacillus fragilis</i> [ <i>B. fragilis</i> ] as the cause of diseases classified to other chapters        |
| B98.0 | <i>Helicobacter pylori</i> [ <i>H.pylori</i> ] as the cause of diseases classified to other chapters         |
| B98.1 | <i>Vibrio vulnificus</i> as the cause of diseases classified to other chapters                               |
| G00.0 | Haemophilus meningitis                                                                                       |
| J14*  | Pneumonia due to <i>Haemophilus influenzae</i>                                                               |
| J15.0 | Pneumonia due to <i>Klebsiella pneumoniae</i>                                                                |
| J15.1 | Pneumonia due to <i>Pseudomonas</i>                                                                          |
| J15.5 | Pneumonia due to <i>Escherichia coli</i>                                                                     |
| J15.6 | Pneumonia due to other aerobic Gram-negative bacteria                                                        |
| J16.0 | Chlamydial pneumonia                                                                                         |

|       |                                                                  |
|-------|------------------------------------------------------------------|
| J20.1 | Acute bronchitis due to Haemophilus influenzae                   |
| K67.0 | Chlamydial peritonitis                                           |
| K67.1 | Gonococcal peritonitis                                           |
| K67.2 | Syphilitic peritonitis                                           |
| M01.0 | Meningococcal arthritis                                          |
| M01.2 | Arthritis in Lyme disease                                        |
| M49.1 | Brucella spondylitis                                             |
| M49.2 | Enterobacterial spondylitis                                      |
| M73.0 | Gonococcal bursitis                                              |
| M73.1 | Syphilitic bursitis                                              |
| N29.0 | Late syphilis of kidney                                          |
| N74.2 | Female syphilitic pelvic inflammatory disease                    |
| N74.3 | Female gonococcal pelvic inflammatory disease                    |
| N74.4 | Female chlamydial pelvic inflammatory disease                    |
| O98.1 | Syphilis complicating pregnancy, childbirth and the puerperium   |
| O98.2 | Gonorrhoea complicating pregnancy, childbirth and the puerperium |
| P23.1 | Congenital pneumonia due to Chlamydia                            |
| P23.4 | Congenital pneumonia due to Escherichia coli                     |
| P23.5 | Congenital pneumonia due to Pseudomonas                          |
| P36.4 | Sepsis of newborn due to Escherichia coli                        |

#### **Mycobacterial infections**

|       |                                                                             |
|-------|-----------------------------------------------------------------------------|
| A15*  | Respiratory tuberculosis, bacteriologically and histologically confirmed    |
| A16*  | Respiratory tuberculosis, not confirmed bacteriologically or histologically |
| A17   | Tuberculosis of nervous system                                              |
| A17.0 | Tuberculous meningitis                                                      |
| A17.1 | Meningeal tuberculoma                                                       |
| A17.8 | Other tuberculosis of nervous system                                        |
| A17.9 | Tuberculosis of nervous system, unspecified                                 |
| A18*  | Tuberculosis of other organs                                                |
| A19*  | Miliary tuberculosis                                                        |
| A30*  | Leprosy [Hansen disease]                                                    |
| A31*  | Infection due to other mycobacteria                                         |
| K23.0 | Tuberculous oesophagitis                                                    |
| K67.3 | Tuberculous peritonitis                                                     |
| M01.1 | Tuberculous arthritis                                                       |
| M49.0 | Tuberculosis of spine                                                       |
| N74.0 | Tuberculous infection of cervix uteri                                       |
| N74.1 | Female tuberculous pelvic inflammatory disease                              |
| O98.0 | Tuberculosis complicating pregnancy, childbirth and the puerperium          |
| P37.0 | Congenital tuberculosis                                                     |



## **Mycoplasma infections**

|       |                                                                                             |
|-------|---------------------------------------------------------------------------------------------|
| A49.3 | Mycoplasma infection, unspecified site                                                      |
| B96.0 | Mycoplasma pneumoniae [M. pneumoniae] as the cause of diseases classified to other chapters |
| J15.7 | Pneumonia due to Mycoplasma pneumoniae                                                      |
| J20.0 | Acute bronchitis due to Mycoplasma pneumoniae                                               |

## **Central nervous system infections**

|       |                                                                            |
|-------|----------------------------------------------------------------------------|
| A06.6 | Amoebic brain abscess                                                      |
| A17.0 | Tuberculous meningitis                                                     |
| A17.1 | Meningeal tuberculoma                                                      |
| A20.3 | Plague meningitis                                                          |
| A32.1 | Listerial meningitis and meningoencephalitis                               |
| A39.0 | Meningococcal meningitis                                                   |
| A50.4 | Late congenital neurosyphilis [juvenile neurosyphilis]                     |
| A52.1 | Symptomatic neurosyphilis                                                  |
| A52.2 | Asymptomatic neurosyphilis                                                 |
| A52.3 | Neurosyphilis, unspecified                                                 |
| A80*  | Acute poliomyelitis                                                        |
| A81.1 | Subacute sclerosing panencephalitis                                        |
| A81.2 | Progressive multifocal leukoencephalopathy                                 |
| A83*  | Mosquito-borne viral encephalitis                                          |
| A84*  | Tick-borne viral encephalitis                                              |
| A85*  | Other viral encephalitis, not elsewhere classified                         |
| A86*  | Unspecified viral encephalitis                                             |
| A87*  | Viral meningitis                                                           |
| A88*  | Other viral infections of central nervous system, not elsewhere classified |
| A89*  | Unspecified viral infection of central nervous system                      |
| B00.3 | Herpesviral meningitis                                                     |
| B00.4 | Herpesviral encephalitis                                                   |
| B01.0 | Varicella meningitis                                                       |
| B01.1 | Varicella encephalitis                                                     |
| B02.0 | Zoster encephalitis                                                        |
| B02.1 | Zoster meningitis                                                          |
| B05.0 | Measles complicated by encephalitis                                        |
| B05.1 | Measles complicated by meningitis                                          |
| B06.0 | Rubella with neurological complications                                    |
| B15.0 | Hepatitis A with hepatic coma                                              |
| B16.0 | Acute hepatitis B with delta-agent (coinfection) with hepatic coma         |
| B16.2 | Acute hepatitis B without delta-agent with hepatic coma                    |
| B19.0 | Unspecified viral hepatitis with hepatic coma                              |
| B22.0 | HIV disease resulting in encephalopathy                                    |
| B26.1 | Mumps meningitis                                                           |

|       |                                                                                                              |
|-------|--------------------------------------------------------------------------------------------------------------|
| B26.2 | Mumps encephalitis                                                                                           |
| B37.5 | Candidal meningitis                                                                                          |
| B38.4 | Coccidioidomycosis meningitis                                                                                |
| B43.1 | Phaeomycotic brain abscess                                                                                   |
| B45.1 | Cerebral cryptococcosis                                                                                      |
| B46.1 | Rhinocerebral mucormycosis                                                                                   |
| B50.0 | Plasmodium falciparum malaria with cerebral complications                                                    |
| B58.2 | Toxoplasma meningoencephalitis                                                                               |
| B60.2 | Naegleriasis                                                                                                 |
| B69.0 | Cysticercosis of central nervous system                                                                      |
| G00   | Bacterial meningitis, not elsewhere classified                                                               |
| G00.0 | Haemophilus meningitis                                                                                       |
| G00.1 | Pneumococcal meningitis                                                                                      |
| G00.2 | Streptococcal meningitis                                                                                     |
| G00.3 | Staphylococcal meningitis                                                                                    |
| G00.8 | Other bacterial meningitis                                                                                   |
| G00.9 | Bacterial meningitis, unspecified                                                                            |
| G01*  | Meningitis in bacterial diseases classified elsewhere                                                        |
| G02.0 | Meningitis in viral diseases classified elsewhere                                                            |
| G02.1 | Meningitis in mycoses                                                                                        |
| G02.8 | Meningitis in other specified infectious and parasitic diseases classified elsewhere                         |
| G03*  | Meningitis due to other and unspecified causes                                                               |
| G04.1 | Tropical spastic paraplegia                                                                                  |
| G04.2 | Bacterial meningoencephalitis and meningomyelitis, not elsewhere classified                                  |
| G05.0 | Encephalitis, myelitis and encephalomyelitis in bacterial diseases classified elsewhere                      |
| G05.1 | Encephalitis, myelitis and encephalomyelitis in viral diseases classified elsewhere                          |
| G05.2 | Encephalitis, myelitis and encephalomyelitis in other infectious and parasitic diseases classified elsewhere |
| G06*  | Intracranial and intraspinal abscess and granuloma                                                           |
| G07*  | Intracranial and intraspinal abscess and granuloma in diseases classified elsewhere                          |
| I68.1 | Cerebral arteritis in infectious and parasitic diseases classified elsewhere                                 |
| P35.0 | Congenital rubella syndrome                                                                                  |
| P35.1 | Congenital cytomegalovirus infection                                                                         |

#### Extra-central nervous system infections

|       |                                         |
|-------|-----------------------------------------|
| A00*  | Cholera                                 |
| A01*  | Typhoid and paratyphoid fevers          |
| A02   | Other salmonella infections             |
| A02.0 | Salmonella enteritis                    |
| A02.1 | Salmonella sepsis                       |
| A02.2 | Localized salmonella infections         |
| A02.8 | Other specified salmonella infections   |
| A02.9 | Salmonella infection, unspecified       |
| A03   | Shigellosis                             |
| A03.0 | Shigellosis due to Shigella dysenteriae |
| A03.1 | Shigellosis due to Shigella flexneri    |

|       |                                                                                      |
|-------|--------------------------------------------------------------------------------------|
| A03.2 | Shigellosis due to <i>Shigella boydii</i>                                            |
| A03.3 | Shigellosis due to <i>Shigella sonnei</i>                                            |
| A03.8 | Other shigellosis                                                                    |
| A03.9 | Shigellosis, unspecified                                                             |
| A04   | Other bacterial intestinal infections                                                |
| A04.0 | Enteropathogenic <i>Escherichia coli</i> infection                                   |
| A04.1 | Enterotoxigenic <i>Escherichia coli</i> infection                                    |
| A04.2 | Enteroinvasive <i>Escherichia coli</i> infection                                     |
| A04.3 | Enterohaemorrhagic <i>Escherichia coli</i> infection                                 |
| A04.4 | Other intestinal <i>Escherichia coli</i> infections                                  |
| A04.5 | <i>Campylobacter</i> enteritis                                                       |
| A04.6 | Enteritis due to <i>Yersinia enterocolitica</i>                                      |
| A04.7 | Enterocolitis due to <i>Clostridium difficile</i>                                    |
| A04.8 | Other specified bacterial intestinal infections                                      |
| A04.9 | Bacterial intestinal infection, unspecified                                          |
| A05   | Other bacterial foodborne intoxications, not elsewhere classified                    |
| A05.0 | Foodborne staphylococcal intoxication                                                |
| A05.1 | Botulism                                                                             |
| A05.2 | Foodborne <i>Clostridium perfringens</i> [ <i>Clostridium welchii</i> ] intoxication |
| A05.3 | Foodborne <i>Vibrio parahaemolyticus</i> intoxication                                |
| A05.4 | Foodborne <i>Bacillus cereus</i> intoxication                                        |
| A05.8 | Other specified bacterial foodborne intoxications                                    |
| A05.9 | Bacterial foodborne intoxication, unspecified                                        |
| A06   | Amoebiasis                                                                           |
| A06.0 | Acute amoebic dysentery                                                              |
| A06.1 | Chronic intestinal amoebiasis                                                        |
| A06.2 | Amoebic nondysenteric colitis                                                        |
| A06.3 | Amoeboma of intestine                                                                |
| A06.4 | Amoebic liver abscess                                                                |
| A06.5 | Amoebic lung abscess                                                                 |
| A06.7 | Cutaneous amoebiasis                                                                 |
| A06.8 | Amoebic infection of other sites                                                     |
| A06.9 | Amoebiasis, unspecified                                                              |
| A07*  | Other protozoal intestinal diseases                                                  |
| A08.0 | Rotaviral enteritis                                                                  |
| A08.1 | Acute gastroenteropathy due to Norwalk agent                                         |
| A08.2 | Adenoviral enteritis                                                                 |
| A08.3 | Other viral enteritis                                                                |
| A08.4 | Viral intestinal infection, unspecified                                              |
| A08.5 | Other specified intestinal infections                                                |
| A09*  | Other gastroenteritis and colitis of infectious and unspecified origin               |
| A15*  | Respiratory tuberculosis, bacteriologically and histologically confirmed             |
| A16*  | Respiratory tuberculosis, not confirmed bacteriologically or histologically          |
| A17   | Tuberculosis of nervous system                                                       |
| A17.8 | Other tuberculosis of nervous system                                                 |
| A17.9 | Tuberculosis of nervous system, unspecified                                          |
| A18*  | Tuberculosis of other organs                                                         |
| A19*  | Miliary tuberculosis                                                                 |

|       |                                                             |
|-------|-------------------------------------------------------------|
| A20   | Plague                                                      |
| A20.0 | Bubonic plague                                              |
| A20.1 | Cellulocutaneous plague                                     |
| A20.2 | Pneumonic plague                                            |
| A20.7 | Septicaemic plague                                          |
| A20.8 | Other forms of plague                                       |
| A20.9 | Plague, unspecified                                         |
| A21   | Tularaemia                                                  |
| A21.0 | Ulceroglandular tularaemia                                  |
| A21.1 | Oculoglandular tularaemia                                   |
| A21.2 | Pulmonary tularaemia                                        |
| A21.3 | Gastrointestinal tularaemia                                 |
| A21.7 | Generalized tularaemia                                      |
| A21.8 | Other forms of tularaemia                                   |
| A21.9 | Tularaemia, unspecified                                     |
| A22   | Anthrax                                                     |
| A22.0 | Cutaneous anthrax                                           |
| A22.1 | Pulmonary anthrax                                           |
| A22.2 | Gastrointestinal anthrax                                    |
| A22.7 | Anthrax sepsis                                              |
| A22.8 | Other forms of anthrax                                      |
| A22.9 | Anthrax, unspecified                                        |
| A23   | Brucellosis                                                 |
| A23.0 | Brucellosis due to <i>Brucella melitensis</i>               |
| A23.1 | Brucellosis due to <i>Brucella abortus</i>                  |
| A23.2 | Brucellosis due to <i>Brucella suis</i>                     |
| A23.3 | Brucellosis due to <i>Brucella canis</i>                    |
| A23.8 | Other brucellosis                                           |
| A23.9 | Brucellosis, unspecified                                    |
| A24   | Glanders and melioidosis                                    |
| A24.0 | Glanders                                                    |
| A24.1 | Acute and fulminating melioidosis                           |
| A24.2 | Subacute and chronic melioidosis                            |
| A24.3 | Other melioidosis                                           |
| A25   | Rat-bite fevers                                             |
| A25.0 | Spirillosis                                                 |
| A25.1 | Streptobacillosis                                           |
| A25.9 | Rat-bite fever, unspecified                                 |
| A26   | Erysipeloid                                                 |
| A26.0 | Cutaneous erysipeloid                                       |
| A26.7 | Erysipelothrix sepsis                                       |
| A26.8 | Other forms of erysipeloid                                  |
| A26.9 | Erysipeloid, unspecified                                    |
| A27*  | Leptospirosis                                               |
| A28   | Other zoonotic bacterial diseases, not elsewhere classified |
| A28.0 | Pasteurellosis                                              |
| A28.1 | Cat-scratch disease                                         |
| A28.2 | Extraintestinal yersiniosis                                 |

|       |                                                                       |
|-------|-----------------------------------------------------------------------|
| A28.8 | Other specified zoonotic bacterial diseases, not elsewhere classified |
| A28.9 | Zoonotic bacterial disease, unspecified                               |
| A30*  | Leprosy [Hansen disease]                                              |
| A31*  | Infection due to other mycobacteria                                   |
| A32   | Listeriosis                                                           |
| A32.0 | Cutaneous listeriosis                                                 |
| A32.7 | Listerial sepsis                                                      |
| A32.8 | Other forms of listeriosis                                            |
| A32.9 | Listeriosis, unspecified                                              |
| A33*  | Tetanus neonatorum                                                    |
| A34*  | Obstetrical tetanus                                                   |
| A35*  | Other tetanus                                                         |
| A36*  | Diphtheria                                                            |
| A37*  | Whooping cough                                                        |
| A38*  | Scarlet fever                                                         |
| A39   | Meningococcal infection                                               |
| A39.1 | Waterhouse-Friderichsen syndrome                                      |
| A39.2 | Acute meningococcaemia                                                |
| A39.3 | Chronic meningococcaemia                                              |
| A39.4 | Meningococcaemia, unspecified                                         |
| A39.5 | Meningococcal heart disease                                           |
| A39.8 | Other meningococcal infections                                        |
| A39.9 | Meningococcal infection, unspecified                                  |
| A40   | Streptococcal sepsis                                                  |
| A40.0 | Sepsis due to streptococcus, group A                                  |
| A40.1 | Sepsis due to streptococcus, group B                                  |
| A40.2 | Sepsis due to streptococcus, group D                                  |
| A40.3 | Sepsis due to Streptococcus pneumoniae                                |
| A40.8 | Other streptococcal sepsis                                            |
| A40.9 | Streptococcal sepsis, unspecified                                     |
| A41   | Other sepsis                                                          |
| A41.0 | Sepsis due to Staphylococcus aureus                                   |
| A41.1 | Sepsis due to other specified staphylococcus                          |
| A41.2 | Sepsis due to unspecified staphylococcus                              |
| A41.3 | Sepsis due to Haemophilus influenzae                                  |
| A41.4 | Sepsis due to anaerobes                                               |
| A41.5 | Sepsis due to other Gram-negative organisms                           |
| A41.8 | Other specified sepsis                                                |
| A41.9 | Sepsis, unspecified                                                   |
| A42   | Actinomycosis                                                         |
| A42.0 | Pulmonary actinomycosis                                               |
| A42.1 | Abdominal actinomycosis                                               |
| A42.2 | Cervicofacial actinomycosis                                           |
| A42.7 | Actinomycotic sepsis                                                  |
| A42.8 | Other forms of actinomycosis                                          |
| A42.9 | Actinomycosis, unspecified                                            |
| A43   | Nocardiosis                                                           |
| A43.0 | Pulmonary nocardiosis                                                 |

|       |                                                                                                   |
|-------|---------------------------------------------------------------------------------------------------|
| A43.1 | Cutaneous nocardiosis                                                                             |
| A43.8 | Other forms of nocardiosis                                                                        |
| A44   | Bartonellosis                                                                                     |
| A44.0 | Systemic bartonellosis                                                                            |
| A44.1 | Cutaneous and mucocutaneous bartonellosis                                                         |
| A44.8 | Other forms of bartonellosis                                                                      |
| A44.9 | Bartonellosis, unspecified                                                                        |
| A46*  | Erysipelas                                                                                        |
| A48.0 | Gas gangrene                                                                                      |
| A48.1 | Legionnaires disease                                                                              |
| A48.2 | Nonpneumonic Legionnaires disease [Pontiac fever]                                                 |
| A48.3 | Toxic shock syndrome                                                                              |
| A48.4 | Brazilian purpuric fever                                                                          |
| A48.8 | Other specified bacterial diseases                                                                |
| A49   | Bacterial infection of unspecified site                                                           |
| A49.0 | Staphylococcal infection, unspecified site                                                        |
| A49.1 | Streptococcal infection, unspecified site                                                         |
| A49.2 | Haemophilus influenzae infection, unspecified site                                                |
| A49.3 | Mycoplasma infection, unspecified site                                                            |
| A49.8 | Other bacterial infections of unspecified site                                                    |
| A49.9 | Bacterial infection, unspecified                                                                  |
| A50   | Congenital syphilis                                                                               |
| A50.0 | Early congenital syphilis, symptomatic                                                            |
| A50.1 | Early congenital syphilis, latent                                                                 |
| A50.2 | Early congenital syphilis, unspecified                                                            |
| A50.3 | Late congenital syphilitic ophthalmopathy                                                         |
| A50.5 | Other late congenital syphilis, symptomatic                                                       |
| A50.6 | Late congenital syphilis, latent                                                                  |
| A50.7 | Late congenital syphilis, unspecified                                                             |
| A50.9 | Congenital syphilis, unspecified                                                                  |
| A51   | Early syphilis                                                                                    |
| A51.0 | Primary genital syphilis                                                                          |
| A51.1 | Primary anal syphilis                                                                             |
| A51.2 | Primary syphilis of other sites                                                                   |
| A51.3 | Secondary syphilis of skin and mucous membranes                                                   |
| A51.4 | Other secondary syphilis                                                                          |
| A51.5 | Early syphilis, latent                                                                            |
| A51.9 | Early syphilis, unspecified                                                                       |
| A52   | Late syphilis                                                                                     |
| A52.0 | Cardiovascular syphilis                                                                           |
| A52.7 | Other symptomatic late syphilis                                                                   |
| A52.8 | Late syphilis, latent                                                                             |
| A52.9 | Late syphilis, unspecified                                                                        |
| A53*  | Other and unspecified syphilis                                                                    |
| A54   | Gonococcal infection                                                                              |
| A54.0 | Gonococcal infection of lower genitourinary tract without periurethral or accessory gland abscess |
| A54.1 | Gonococcal infection of lower genitourinary tract with periurethral and accessory gland abscess   |
| A54.2 | Gonococcal pelviperitonitis and other gonococcal genitourinary infections                         |

|       |                                                                        |
|-------|------------------------------------------------------------------------|
| A54.3 | Gonococcal infection of eye                                            |
| A54.4 | Gonococcal infection of musculoskeletal system                         |
| A54.5 | Gonococcal pharyngitis                                                 |
| A54.6 | Gonococcal infection of anus and rectum                                |
| A54.8 | Other gonococcal infections                                            |
| A54.9 | Gonococcal infection, unspecified                                      |
| A55*  | Chlamydial lymphogranuloma (venereum)                                  |
| A56.0 | Chlamydial infection of lower genitourinary tract                      |
| A56.1 | Chlamydial infection of pelviperitoneum and other genitourinary organs |
| A56.2 | Chlamydial infection of genitourinary tract, unspecified               |
| A56.3 | Chlamydial infection of anus and rectum                                |
| A56.4 | Chlamydial infection of pharynx                                        |
| A56.8 | Sexually transmitted chlamydial infection of other sites               |
| A57*  | Chancroid                                                              |
| A58*  | Granuloma inguinale                                                    |
| A59*  | Trichomoniasis                                                         |
| A60*  | Anogenital herpesviral [herpes simplex] infection                      |
| A63.0 | Anogenital (venereal) warts                                            |
| A63.8 | Other specified predominantly sexually transmitted diseases            |
| A64*  | Unspecified sexually transmitted disease                               |
| A65*  | Nonvenereal syphilis                                                   |
| A66*  | Yaws                                                                   |
| A67*  | Pinta [carate]                                                         |
| A68*  | Relapsing fevers                                                       |
| A69   | Other spirochaetal infections                                          |
| A69.0 | Necrotizing ulcerative stomatitis                                      |
| A69.1 | Other Vincent infections                                               |
| A69.2 | Lyme disease                                                           |
| A69.8 | Other specified spirochaetal infections                                |
| A69.9 | Spirochaetal infection, unspecified                                    |
| A70*  | Chlamydia psittaci infection                                           |
| A71*  | Trachoma                                                               |
| A74.0 | Chlamydial conjunctivitis                                              |
| A74.8 | Other chlamydial diseases                                              |
| A74.9 | Chlamydial infection, unspecified                                      |
| A75   | Typhus fever                                                           |
| A75.0 | Epidemic louse-borne typhus fever due to Rickettsia prowazekii         |
| A75.1 | Recrudescence typhus [Brill disease]                                   |
| A75.2 | Typhus fever due to Rickettsia typhi                                   |
| A75.3 | Typhus fever due to Rickettsia tsutsugamushi                           |
| A75.9 | Typhus fever, unspecified                                              |
| A77   | Spotted fever [tick-borne rickettsioses]                               |
| A77.0 | Spotted fever due to Rickettsia rickettsii                             |
| A77.1 | Spotted fever due to Rickettsia conorii                                |
| A77.2 | Spotted fever due to Rickettsia sibirica                               |
| A77.3 | Spotted fever due to Rickettsia australis                              |
| A77.8 | Other spotted fevers                                                   |
| A77.9 | Spotted fever, unspecified                                             |

|       |                                                              |
|-------|--------------------------------------------------------------|
| A78*  | Q fever                                                      |
| A79   | Other rickettsioses                                          |
| A79.0 | Trench fever                                                 |
| A79.1 | Rickettsialpox due to Rickettsia akari                       |
| A79.8 | Other specified rickettsioses                                |
| A79.9 | Rickettsiosis, unspecified                                   |
| A90*  | Dengue fever [classical dengue]                              |
| A91*  | Dengue haemorrhagic fever                                    |
| A92   | Other mosquito-borne viral fevers                            |
| A92.0 | Chikungunya virus disease                                    |
| A92.1 | O'nyong-nyong fever                                          |
| A92.2 | Venezuelan equine fever                                      |
| A92.3 | West Nile virus infection                                    |
| A92.4 | Rift Valley fever                                            |
| A92.8 | Other specified mosquito-borne viral fevers                  |
| A92.9 | Mosquito-borne viral fever, unspecified                      |
| A93   | Other arthropod-borne viral fevers, not elsewhere classified |
| A93.0 | Oropouche virus disease                                      |
| A93.1 | Sandfly fever                                                |
| A93.2 | Colorado tick fever                                          |
| A93.8 | Other specified arthropod-borne viral fevers                 |
| A94*  | Unspecified arthropod-borne viral fever                      |
| A95*  | Yellow fever                                                 |
| A96*  | Arenaviral haemorrhagic fever                                |
| A97*  | Dengue                                                       |
| A98   | Other viral haemorrhagic fevers, not elsewhere classified    |
| A98.0 | Crimean-Congo haemorrhagic fever                             |
| A98.1 | Omsk haemorrhagic fever                                      |
| A98.2 | Kyasanur Forest disease                                      |
| A98.3 | Marburg virus disease                                        |
| A98.4 | Ebola virus disease                                          |
| A98.5 | Haemorrhagic fever with renal syndrome                       |
| A98.8 | Other specified viral haemorrhagic fevers                    |
| A99*  | Unspecified viral haemorrhagic fever                         |
| B00   | Herpesviral [herpes simplex] infections                      |
| B00.0 | Eczema herpeticum                                            |
| B00.1 | Herpesviral vesicular dermatitis                             |
| B00.2 | Herpesviral gingivostomatitis and pharyngotonsillitis        |
| B00.5 | Herpesviral ocular disease                                   |
| B00.7 | Disseminated herpesviral disease                             |
| B00.8 | Other forms of herpesviral infection                         |
| B00.9 | Herpesviral infection, unspecified                           |
| B01   | Varicella [chickenpox]                                       |
| B01.2 | Varicella pneumonia                                          |
| B01.8 | Varicella with other complications                           |
| B01.9 | Varicella without complication                               |
| B02   | Zoster [herpes zoster]                                       |
| B02.2 | Zoster with other nervous system involvement                 |



|       |                                                                                           |
|-------|-------------------------------------------------------------------------------------------|
| B02.3 | Zoster ocular disease                                                                     |
| B02.7 | Disseminated zoster                                                                       |
| B02.8 | Zoster with other complications                                                           |
| B02.9 | Zoster without complication                                                               |
| B04*  | Monkeypox                                                                                 |
| B05   | Measles                                                                                   |
| B05.2 | Measles complicated by pneumonia                                                          |
| B05.3 | Measles complicated by otitis media                                                       |
| B05.4 | Measles with intestinal complications                                                     |
| B05.8 | Measles with other complications                                                          |
| B05.9 | Measles without complication                                                              |
| B06   | Rubella [German measles]                                                                  |
| B06.8 | Rubella with other complications                                                          |
| B06.9 | Rubella without complication                                                              |
| B07*  | Viral warts                                                                               |
| B08.0 | Other orthopoxvirus infections                                                            |
| B08.1 | Molluscum contagiosum                                                                     |
| B08.2 | Exanthema subitum [sixth disease]                                                         |
| B08.3 | Erythema infectiosum [fifth disease]                                                      |
| B08.4 | Enteroviral vesicular stomatitis with exanthem                                            |
| B08.5 | Enteroviral vesicular pharyngitis                                                         |
| B08.8 | Other specified viral infections characterized by skin and mucous membrane lesions        |
| B09*  | Unspecified viral infection characterized by skin and mucous membrane lesions             |
| B15   | Acute hepatitis A                                                                         |
| B15.9 | Hepatitis A without hepatic coma                                                          |
| B16   | Acute hepatitis B                                                                         |
| B16.1 | Acute hepatitis B with delta-agent (coinfection) without hepatic coma                     |
| B16.9 | Acute hepatitis B without delta-agent and without hepatic coma                            |
| B17*  | Other acute viral hepatitis                                                               |
| B18*  | Chronic viral hepatitis                                                                   |
| B19   | Unspecified viral hepatitis                                                               |
| B19.9 | Unspecified viral hepatitis without hepatic coma                                          |
| B20*  | Human immunodeficiency virus [HIV] disease resulting in infectious and parasitic diseases |
| B21*  | Human immunodeficiency virus [HIV] disease resulting in malignant neoplasms               |
| B21.0 | HIV disease resulting in Kaposi sarcoma                                                   |
| B22   | Human immunodeficiency virus [HIV] disease resulting in other specified diseases          |
| B22.1 | HIV disease resulting in lymphoid interstitial pneumonitis                                |
| B22.2 | HIV disease resulting in wasting syndrome                                                 |
| B22.7 | HIV disease resulting in multiple diseases classified elsewhere                           |
| B23*  | Human immunodeficiency virus [HIV] disease resulting in other conditions                  |
| B24*  | Unspecified human immunodeficiency virus [HIV] disease                                    |
| B25*  | Cytomegaloviral disease                                                                   |
| B26   | Mumps                                                                                     |
| B26.0 | Mumps orchitis                                                                            |
| B26.3 | Mumps pancreatitis                                                                        |
| B26.8 | Mumps with other complications                                                            |
| B26.9 | Mumps without complication                                                                |
| B27   | Infectious mononucleosis                                                                  |

|       |                                                     |
|-------|-----------------------------------------------------|
| B27.0 | Gammaherpesviral mononucleosis                      |
| B27.1 | Cytomegaloviral mononucleosis                       |
| B27.8 | Other infectious mononucleosis                      |
| B27.9 | Infectious mononucleosis, unspecified               |
| B30*  | Viral conjunctivitis                                |
| B33   | Other viral diseases, not elsewhere classified      |
| B33.0 | Epidemic myalgia                                    |
| B33.1 | Ross River disease                                  |
| B33.2 | Viral carditis                                      |
| B33.3 | Retrovirus infections, not elsewhere classified     |
| B33.4 | Hantavirus (cardio-)pulmonary syndrome [HPS] [HCPS] |
| B33.8 | Other specified viral diseases                      |
| B34   | Viral infection of unspecified site                 |
| B34.0 | Adenovirus infection, unspecified site              |
| B34.1 | Enterovirus infection, unspecified site             |
| B34.2 | Coronavirus infection, unspecified site             |
| B34.3 | Parvovirus infection, unspecified site              |
| B34.4 | Papovavirus infection, unspecified site             |
| B34.8 | Other viral infections of unspecified site          |
| B34.9 | Viral infection, unspecified                        |
| B35*  | Dermatophytosis                                     |
| B36*  | Other superficial mycoses                           |
| B37   | Candidiasis                                         |
| B37.0 | Candidal stomatitis                                 |
| B37.1 | Pulmonary candidiasis                               |
| B37.2 | Candidiasis of skin and nail                        |
| B37.3 | Candidiasis of vulva and vagina                     |
| B37.4 | Candidiasis of other urogenital sites               |
| B37.6 | Candidal endocarditis                               |
| B37.7 | Candidal sepsis                                     |
| B37.8 | Candidiasis of other sites                          |
| B37.9 | Candidiasis, unspecified                            |
| B38   | Coccidioidomycosis                                  |
| B38.0 | Acute pulmonary coccidioidomycosis                  |
| B38.1 | Chronic pulmonary coccidioidomycosis                |
| B38.2 | Pulmonary coccidioidomycosis, unspecified           |
| B38.3 | Cutaneous coccidioidomycosis                        |
| B38.7 | Disseminated coccidioidomycosis                     |
| B38.8 | Other forms of coccidioidomycosis                   |
| B38.9 | Coccidioidomycosis, unspecified                     |
| B39   | Histoplasmosis                                      |
| B39.0 | Acute pulmonary histoplasmosis capsulati            |
| B39.1 | Chronic pulmonary histoplasmosis capsulati          |
| B39.2 | Pulmonary histoplasmosis capsulati, unspecified     |
| B39.3 | Disseminated histoplasmosis capsulati               |
| B39.4 | Histoplasmosis capsulati, unspecified               |
| B39.5 | Histoplasmosis duboisii                             |
| B39.9 | Histoplasmosis, unspecified                         |

|       |                                            |
|-------|--------------------------------------------|
| B40   | Blastomycosis                              |
| B40.0 | Acute pulmonary blastomycosis              |
| B40.1 | Chronic pulmonary blastomycosis            |
| B40.2 | Pulmonary blastomycosis, unspecified       |
| B40.3 | Cutaneous blastomycosis                    |
| B40.7 | Disseminated blastomycosis                 |
| B40.8 | Other forms of blastomycosis               |
| B40.9 | Blastomycosis, unspecified                 |
| B41   | Paracoccidioidomycosis                     |
| B41.0 | Pulmonary paracoccidioidomycosis           |
| B41.7 | Disseminated paracoccidioidomycosis        |
| B41.8 | Other forms of paracoccidioidomycosis      |
| B41.9 | Paracoccidioidomycosis, unspecified        |
| B42   | Sporotrichosis                             |
| B42.0 | Pulmonary sporotrichosis                   |
| B42.1 | Lymphocutaneous sporotrichosis             |
| B42.7 | Disseminated sporotrichosis                |
| B42.8 | Other forms of sporotrichosis              |
| B42.9 | Sporotrichosis, unspecified                |
| B43   | Chromomycosis and phaeomycotic abscess     |
| B43.0 | Cutaneous chromomycosis                    |
| B43.2 | Subcutaneous phaeomycotic abscess and cyst |
| B43.8 | Other forms of chromomycosis               |
| B43.9 | Chromomycosis, unspecified                 |
| B44*  | Aspergillosis                              |
| B45   | Cryptococcosis                             |
| B45.0 | Pulmonary cryptococcosis                   |
| B45.2 | Cutaneous cryptococcosis                   |
| B45.3 | Osseous cryptococcosis                     |
| B45.7 | Disseminated cryptococcosis                |
| B45.8 | Other forms of cryptococcosis              |
| B45.9 | Cryptococcosis, unspecified                |
| B46   | Zygomycosis                                |
| B46.0 | Pulmonary mucormycosis                     |
| B46.2 | Gastrointestinal mucormycosis              |
| B46.3 | Cutaneous mucormycosis                     |
| B46.4 | Disseminated mucormycosis                  |
| B46.5 | Mucormycosis, unspecified                  |
| B46.8 | Other zygomycoses                          |
| B46.9 | Zygomycosis, unspecified                   |
| B47   | Mycetoma                                   |
| B47.0 | Eumycetoma                                 |
| B47.1 | Actinomycetoma                             |
| B47.9 | Mycetoma, unspecified                      |
| B48   | Other mycoses, not elsewhere classified    |
| B48.0 | Lobomycosis                                |
| B48.1 | Rhinosporidiosis                           |
| B48.2 | Allescheriasis                             |

|       |                                                                          |
|-------|--------------------------------------------------------------------------|
| B48.3 | Geotrichosis                                                             |
| B48.4 | Penicillosis                                                             |
| B48.7 | Opportunistic mycoses                                                    |
| B48.8 | Other specified mycoses                                                  |
| B49*  | Unspecified mycosis                                                      |
| B50*  | Plasmodium falciparum malaria                                            |
| B50.8 | Other severe and complicated Plasmodium falciparum malaria               |
| B50.9 | Plasmodium falciparum malaria, unspecified                               |
| B51*  | Plasmodium vivax malaria                                                 |
| B52*  | Plasmodium malariae malaria                                              |
| B53   | Other parasitologically confirmed malaria                                |
| B53.0 | Plasmodium ovale malaria                                                 |
| B53.1 | Malaria due to simian plasmodia                                          |
| B53.8 | Other parasitologically confirmed malaria, not elsewhere classified      |
| B54*  | Unspecified malaria                                                      |
| B55.0 | Visceral leishmaniasis                                                   |
| B55.1 | Cutaneous leishmaniasis                                                  |
| B55.2 | Mucocutaneous leishmaniasis                                              |
| B55.9 | Leishmaniasis, unspecified                                               |
| B56*  | African trypanosomiasis                                                  |
| B57*  | Chagas disease                                                           |
| B58   | Toxoplasmosis                                                            |
| B58.0 | Toxoplasma oculopathy                                                    |
| B58.1 | Toxoplasma hepatitis                                                     |
| B58.3 | Pulmonary toxoplasmosis                                                  |
| B58.8 | Toxoplasmosis with other organ involvement                               |
| B58.9 | Toxoplasmosis, unspecified                                               |
| B59*  | Pneumocystosis                                                           |
| B60.0 | Babesiosis                                                               |
| B60.1 | Acanthamoebiasis                                                         |
| B60.8 | Other specified protozoal diseases                                       |
| B64*  | Unspecified protozoal disease                                            |
| B65   | Schistosomiasis [bilharziasis]                                           |
| B65.0 | Schistosomiasis due to Schistosoma haematobium [urinary schistosomiasis] |
| B65.1 | Schistosomiasis due to Schistosoma mansoni [intestinal schistosomiasis]  |
| B65.2 | Schistosomiasis due to Schistosoma japonicum                             |
| B65.3 | Cercarial dermatitis                                                     |
| B65.8 | Other schistosomiasis                                                    |
| B65.9 | Schistosomiasis, unspecified                                             |
| B66   | Other fluke infections                                                   |
| B66.0 | Opisthorchiasis                                                          |
| B66.1 | Clonorchiasis                                                            |
| B66.2 | Dicrocoeliasis                                                           |
| B66.3 | Fascioliasis                                                             |
| B66.4 | Paragonimiasis                                                           |
| B66.5 | Fasciolopsiasis                                                          |
| B66.8 | Other specified fluke infections                                         |
| B66.9 | Fluke infection, unspecified                                             |

|       |                                                             |
|-------|-------------------------------------------------------------|
| B67*  | Echinococcosis                                              |
| B68   | Taeniasis                                                   |
| B68.0 | Taenia solium taeniasis                                     |
| B68.1 | Taenia saginata taeniasis                                   |
| B68.9 | Taeniasis, unspecified                                      |
| B69   | Cysticercosis                                               |
| B69.1 | Cysticercosis of eye                                        |
| B69.8 | Cysticercosis of other sites                                |
| B69.9 | Cysticercosis, unspecified                                  |
| B70   | Diphyllobothriasis and sparganosis                          |
| B70.0 | Diphyllobothriasis                                          |
| B70.1 | Sparganosis                                                 |
| B71   | Other cestode infections                                    |
| B71.0 | Hymenolepiasis                                              |
| B71.1 | Dipylidiasis                                                |
| B71.8 | Other specified cestode infections                          |
| B71.9 | Cestode infection, unspecified                              |
| B72*  | Dracunculiasis                                              |
| B73*  | Onchocerciasis                                              |
| B74*  | Filariasis                                                  |
| B75*  | Trichinellosis                                              |
| B76*  | Hookworm diseases                                           |
| B77*  | Ascariasis                                                  |
| B78*  | Strongyloidiasis                                            |
| B79*  | Trichuriasis                                                |
| B80*  | Enterobiasis                                                |
| B81   | Other intestinal helminthiases, not elsewhere classified    |
| B81.0 | Anisakiasis                                                 |
| B81.1 | Intestinal capillariasis                                    |
| B81.2 | Trichostrongyliasis                                         |
| B81.3 | Intestinal angiostrongyliasis                               |
| B81.4 | Mixed intestinal helminthiases                              |
| B81.8 | Other specified intestinal helminthiases                    |
| B82   | Unspecified intestinal parasitism                           |
| B82.0 | Intestinal helminthiasis, unspecified                       |
| B82.9 | Intestinal parasitism, unspecified                          |
| B83   | Other helminthiases                                         |
| B83.0 | Visceral larva migrans                                      |
| B83.1 | Gnathostomiasis                                             |
| B83.2 | Angiostrongyliasis due to <i>Parastrongylus cantonensis</i> |
| B83.3 | Syngamiasis                                                 |
| B83.4 | Internal hirudiniasis                                       |
| B83.8 | Other specified helminthiases                               |
| B83.9 | Helminthiasis, unspecified                                  |
| B85*  | Pediculosis and phthiriasis                                 |
| B86*  | Scabies                                                     |
| B87*  | Myiasis                                                     |
| B88   | Other infestations                                          |

|       |                                                                                                    |
|-------|----------------------------------------------------------------------------------------------------|
| B88.0 | Other acariasis                                                                                    |
| B88.1 | Tungiasis [sandflea infestation]                                                                   |
| B88.2 | Other arthropod infestations                                                                       |
| B88.3 | External hirudiniasis                                                                              |
| B88.8 | Other specified infestations                                                                       |
| B88.9 | Infestation, unspecified                                                                           |
| B89*  | Unspecified parasitic disease                                                                      |
| B95*  | Streptococcus and staphylococcus as the cause of diseases classified to other chapters             |
| B96.0 | Mycoplasma pneumoniae [M. pneumoniae] as the cause of diseases classified to other chapters        |
| B96.1 | Klebsiella pneumoniae [K. pneumoniae] as the cause of diseases classified to other chapters        |
| B96.2 | Escherichia coli [E. coli] as the cause of diseases classified to other chapters                   |
| B96.3 | Haemophilus influenzae [H. influenzae] as the cause of diseases classified to other chapters       |
| B96.4 | Proteus (mirabilis)(morganii) as the cause of diseases classified to other chapters                |
| B96.5 | Pseudomonas (aeruginosa) as the cause of diseases classified to other chapters                     |
| B96.6 | Bacillus fragilis [B. fragilis] as the cause of diseases classified to other chapters              |
| B96.7 | Clostridium perfringens [C. perfringens] as the cause of diseases classified to other chapters     |
| B96.8 | Other specified bacterial agents as the cause of diseases classified to other chapters             |
| B97   | Viral agents as the cause of diseases classified to other chapters                                 |
| B97.0 | Adenovirus as the cause of diseases classified to other chapters                                   |
| B97.1 | Enterovirus as the cause of diseases classified to other chapters                                  |
| B97.2 | Coronavirus as the cause of diseases classified to other chapters                                  |
| B97.3 | Retrovirus as the cause of diseases classified to other chapters                                   |
| B97.4 | Respiratory syncytial virus as the cause of diseases classified to other chapters                  |
| B97.5 | Reovirus as the cause of diseases classified to other chapters                                     |
| B97.6 | Parvovirus as the cause of diseases classified to other chapters                                   |
| B97.7 | Papillomavirus as the cause of diseases classified to other chapters                               |
| B97.8 | Other viral agents as the cause of diseases classified to other chapters                           |
| B98.0 | Helicobacter pylori [H.pylori] as the cause of diseases classified to other chapters               |
| B98.1 | Vibrio vulnificus as the cause of diseases classified to other chapters                            |
| B99*  | Other and unspecified infectious diseases                                                          |
| C46   | Kaposi sarcoma                                                                                     |
| D73.3 | Abscess of spleen                                                                                  |
| E32.1 | Abscess of thymus                                                                                  |
| H00*  | Hordeolum and chalazion                                                                            |
| H01.0 | Blepharitis                                                                                        |
| H05.0 | Acute inflammation of orbit                                                                        |
| H06.1 | Parasitic infestation of orbit in diseases classified elsewhere                                    |
| H10.0 | Mucopurulent conjunctivitis                                                                        |
| H10.5 | Blepharoconjunctivitis                                                                             |
| H13.0 | Filarial infection of conjunctiva                                                                  |
| H19.0 | Scleritis and episcleritis in diseases classified elsewhere                                        |
| H19.1 | Herpesviral keratitis and keratoconjunctivitis                                                     |
| H19.2 | Keratitis and keratoconjunctivitis in other infectious and parasitic diseases classified elsewhere |
| H22.0 | Iridocyclitis in infectious and parasitic diseases classified elsewhere                            |
| H32.0 | Chorioretinal inflammation in infectious and parasitic diseases classified elsewhere               |
| H44.0 | Purulent endophthalmitis                                                                           |
| H60.0 | Abscess of external ear                                                                            |
| H60.1 | Cellulitis of external ear                                                                         |

|       |                                                                                       |
|-------|---------------------------------------------------------------------------------------|
| H60.2 | Malignant otitis externa                                                              |
| H60.3 | Other infective otitis externa                                                        |
| H62.0 | Otitis externa in bacterial diseases classified elsewhere                             |
| H62.1 | Otitis externa in viral diseases classified elsewhere                                 |
| H62.2 | Otitis externa in mycoses                                                             |
| H62.3 | Otitis externa in other infectious and parasitic diseases classified elsewhere        |
| H66.0 | Acute suppurative otitis media                                                        |
| H67.0 | Otitis media in bacterial diseases classified elsewhere                               |
| H67.1 | Otitis media in viral diseases classified elsewhere                                   |
| H70.0 | Acute mastoiditis                                                                     |
| H75.0 | Mastoiditis in infectious and parasitic diseases classified elsewhere                 |
| I30.1 | Infective pericarditis                                                                |
| I32.0 | Pericarditis in bacterial diseases classified elsewhere                               |
| I32.1 | Pericarditis in other infectious and parasitic diseases classified elsewhere          |
| I33.0 | Acute and subacute infective endocarditis                                             |
| I40.0 | Infective myocarditis                                                                 |
| I41.0 | Myocarditis in bacterial diseases classified elsewhere                                |
| I41.1 | Myocarditis in viral diseases classified elsewhere                                    |
| I41.2 | Myocarditis in other infectious and parasitic diseases classified elsewhere           |
| I43.0 | Cardiomyopathy in infectious and parasitic diseases classified elsewhere              |
| I52.0 | Other heart disorders in bacterial diseases classified elsewhere                      |
| I52.1 | Other heart disorders in other infectious and parasitic diseases classified elsewhere |
| J01.0 | Acute maxillary sinusitis                                                             |
| J02   | Acute pharyngitis                                                                     |
| J02.0 | Streptococcal pharyngitis                                                             |
| J02.8 | Acute pharyngitis due to other specified organisms                                    |
| J02.9 | Acute pharyngitis, unspecified                                                        |
| J03   | Acute tonsillitis                                                                     |
| J03.0 | Streptococcal tonsillitis                                                             |
| J03.8 | Acute tonsillitis due to other specified organisms                                    |
| J03.9 | Acute tonsillitis, unspecified                                                        |
| J04*  | Acute laryngitis and tracheitis                                                       |
| J05.1 | Acute epiglottitis                                                                    |
| J09*  | Influenza due to certain identified influenza virus                                   |
| J10*  | Influenza due to other identified influenza virus                                     |
| J11*  | Influenza, virus not identified                                                       |
| J12*  | Viral pneumonia, not elsewhere classified                                             |
| J13*  | Pneumonia due to <i>Streptococcus pneumoniae</i>                                      |
| J14*  | Pneumonia due to <i>Haemophilus influenzae</i>                                        |
| J15   | Bacterial pneumonia, not elsewhere classified                                         |
| J15.0 | Pneumonia due to <i>Klebsiella pneumoniae</i>                                         |
| J15.1 | Pneumonia due to <i>Pseudomonas</i>                                                   |
| J15.2 | Pneumonia due to staphylococcus                                                       |
| J15.3 | Pneumonia due to streptococcus, group B                                               |
| J15.4 | Pneumonia due to other streptococci                                                   |
| J15.5 | Pneumonia due to <i>Escherichia coli</i>                                              |
| J15.6 | Pneumonia due to other aerobic Gram-negative bacteria                                 |
| J15.7 | Pneumonia due to <i>Mycoplasma pneumoniae</i>                                         |

|       |                                                                       |
|-------|-----------------------------------------------------------------------|
| J15.8 | Other bacterial pneumonia                                             |
| J15.9 | Bacterial pneumonia, unspecified                                      |
| J16   | Pneumonia due to other infectious organisms, not elsewhere classified |
| J16.0 | Chlamydial pneumonia                                                  |
| J16.8 | Pneumonia due to other specified infectious organisms                 |
| J17.0 | Pneumonia in bacterial diseases classified elsewhere                  |
| J17.1 | Pneumonia in viral diseases classified elsewhere                      |
| J17.2 | Pneumonia in mycoses                                                  |
| J17.3 | Pneumonia in parasitic diseases                                       |
| J17.8 | Pneumonia in other diseases classified elsewhere                      |
| J18*  | Pneumonia, organism unspecified                                       |
| J20   | Acute bronchitis                                                      |
| J20.0 | Acute bronchitis due to <i>Mycoplasma pneumoniae</i>                  |
| J20.1 | Acute bronchitis due to <i>Haemophilus influenzae</i>                 |
| J20.2 | Acute bronchitis due to streptococcus                                 |
| J20.3 | Acute bronchitis due to coxsackievirus                                |
| J20.4 | Acute bronchitis due to parainfluenza virus                           |
| J20.5 | Acute bronchitis due to respiratory syncytial virus                   |
| J20.6 | Acute bronchitis due to rhinovirus                                    |
| J20.7 | Acute bronchitis due to echovirus                                     |
| J20.8 | Acute bronchitis due to other specified organisms                     |
| J20.9 | Acute bronchitis, unspecified                                         |
| J21*  | Acute bronchiolitis                                                   |
| J21.0 | Acute bronchiolitis due to respiratory syncytial virus                |
| J21.1 | Acute bronchiolitis due to human metapneumovirus                      |
| J21.8 | Acute bronchiolitis due to other specified organisms                  |
| J21.9 | Acute bronchiolitis, unspecified                                      |
| J22*  | Unspecified acute lower respiratory infection                         |
| J36*  | Peritonsillar abscess                                                 |
| J39.0 | Retropharyngeal and parapharyngeal abscess                            |
| J39.1 | Other abscess of pharynx                                              |
| J85.1 | Abscess of lung with pneumonia                                        |
| J85.2 | Abscess of lung without pneumonia                                     |
| J85.3 | Abscess of mediastinum                                                |
| J86*  | Pyothorax                                                             |
| K02*  | Dental caries                                                         |
| K04.4 | Acute apical periodontitis of pulpal origin                           |
| K04.5 | Chronic apical periodontitis                                          |
| K04.6 | Periapical abscess with sinus                                         |
| K04.7 | Periapical abscess without sinus                                      |
| K05.0 | Acute gingivitis                                                      |
| K05.2 | Acute periodontitis                                                   |
| K05.3 | Chronic periodontitis                                                 |
| K05.4 | Periodontosis                                                         |
| K11.3 | Abscess of salivary gland                                             |
| K12.2 | Cellulitis and abscess of mouth                                       |
| K23.0 | Tuberculous oesophagitis                                              |
| K23.1 | Megaesophagus in Chagas disease                                       |



|       |                                                                                     |
|-------|-------------------------------------------------------------------------------------|
| K35*  | Acute appendicitis                                                                  |
| K57.0 | Diverticular disease of small intestine with perforation and abscess                |
| K57.2 | Diverticular disease of large intestine with perforation and abscess                |
| K57.4 | Diverticular disease of both small and large intestine with perforation and abscess |
| K57.8 | Diverticular disease of intestine, part unspecified, with perforation and abscess   |
| K61*  | Abscess of anal and rectal regions                                                  |
| K63.0 | Abscess of intestine                                                                |
| K65.0 | Acute peritonitis                                                                   |
| K67.0 | Chlamydial peritonitis                                                              |
| K67.1 | Gonococcal peritonitis                                                              |
| K67.2 | Syphilitic peritonitis                                                              |
| K67.3 | Tuberculous peritonitis                                                             |
| K67.8 | Other disorders of peritoneum in infectious diseases classified elsewhere           |
| K75.0 | Abscess of liver                                                                    |
| K77.0 | Liver disorders in infectious and parasitic diseases classified elsewhere           |
| L00*  | Staphylococcal scalded skin syndrome                                                |
| L01*  | Impetigo                                                                            |
| L02*  | Cutaneous abscess, furuncle and carbuncle                                           |
| L03*  | Cellulitis                                                                          |
| L04*  | Acute lymphadenitis                                                                 |
| L05*  | Pilonidal cyst                                                                      |
| L08*  | Other local infections of skin and subcutaneous tissue                              |
| L70.1 | Acne conglobata                                                                     |
| M00   | Pyogenic arthritis                                                                  |
| M00.0 | Staphylococcal arthritis and polyarthritis                                          |
| M00.1 | Pneumococcal arthritis and polyarthritis                                            |
| M00.2 | Other streptococcal arthritis and polyarthritis                                     |
| M00.8 | Arthritis and polyarthritis due to other specified bacterial agents                 |
| M00.9 | Pyogenic arthritis, unspecified                                                     |
| M01.0 | Meningococcal arthritis                                                             |
| M01.1 | Tuberculous arthritis                                                               |
| M01.2 | Arthritis in Lyme disease                                                           |
| M01.3 | Arthritis in other bacterial diseases classified elsewhere                          |
| M01.4 | Rubella arthritis                                                                   |
| M01.5 | Arthritis in other viral diseases classified elsewhere                              |
| M01.6 | Arthritis in mycoses                                                                |
| M01.8 | Arthritis in other infectious and parasitic diseases classified elsewhere           |
| M46.2 | Osteomyelitis of vertebra                                                           |
| M46.3 | Infection of intervertebral disc (pyogenic)                                         |
| M46.5 | Other infective spondylopathies                                                     |
| M49.0 | Tuberculosis of spine                                                               |
| M49.1 | Brucella spondylitis                                                                |
| M49.2 | Enterobacterial spondylitis                                                         |
| M49.3 | Spondylopathy in other infectious and parasitic diseases classified elsewhere       |
| M60.0 | Infective myositis                                                                  |
| M63.0 | Myositis in bacterial diseases classified elsewhere                                 |
| M63.1 | Myositis in protozoal and parasitic infections classified elsewhere                 |
| M63.2 | Myositis in other infectious diseases classified elsewhere                          |

|       |                                                                                                  |
|-------|--------------------------------------------------------------------------------------------------|
| M65.0 | Abscess of tendon sheath                                                                         |
| M65.1 | Other infective (teno)synovitis                                                                  |
| M71.0 | Abscess of bursa                                                                                 |
| M71.1 | Other infective bursitis                                                                         |
| M72.6 | Necrotizing fasciitis                                                                            |
| M73.0 | Gonococcal bursitis                                                                              |
| M73.1 | Syphilitic bursitis                                                                              |
| M86*  | Osteomyelitis                                                                                    |
| M86.0 | Acute haematogenous osteomyelitis                                                                |
| M86.1 | Other acute osteomyelitis                                                                        |
| M86.2 | Subacute osteomyelitis                                                                           |
| M86.3 | Chronic multifocal osteomyelitis                                                                 |
| M86.4 | Chronic osteomyelitis with draining sinus                                                        |
| M86.5 | Other chronic haematogenous osteomyelitis                                                        |
| M86.6 | Other chronic osteomyelitis                                                                      |
| M86.8 | Other osteomyelitis                                                                              |
| M86.9 | Osteomyelitis, unspecified                                                                       |
| N08.0 | Glomerular disorders in infectious and parasitic diseases classified elsewhere                   |
| N10*  | Acute tubulo-interstitial nephritis                                                              |
| N13.6 | Pyonephrosis                                                                                     |
| N15.1 | Renal and perinephric abscess                                                                    |
| N16.0 | Renal tubulo-interstitial disorders in infectious and parasitic diseases classified elsewhere    |
| N29.0 | Late syphilis of kidney                                                                          |
| N29.1 | Other disorders of kidney and ureter in infectious and parasitic diseases classified elsewhere   |
| N30.0 | Acute cystitis                                                                                   |
| N34.0 | Urethral abscess                                                                                 |
| N39.0 | Urinary tract infection, site not specified                                                      |
| N41.0 | Acute prostatitis                                                                                |
| N41.2 | Abscess of prostate                                                                              |
| N45*  | Orchitis and epididymitis                                                                        |
| N61*  | Inflammatory disorders of breast                                                                 |
| N70.0 | Acute salpingitis and oophoritis                                                                 |
| N71.0 | Acute inflammatory disease of uterus                                                             |
| N73.0 | Acute parametritis and pelvic cellulitis                                                         |
| N73.3 | Female acute pelvic peritonitis                                                                  |
| N74   | Female pelvic inflammatory disorders in diseases classified elsewhere                            |
| N74.0 | Tuberculous infection of cervix uteri                                                            |
| N74.1 | Female tuberculous pelvic inflammatory disease                                                   |
| N74.2 | Female syphilitic pelvic inflammatory disease                                                    |
| N74.3 | Female gonococcal pelvic inflammatory disease                                                    |
| N74.4 | Female chlamydial pelvic inflammatory disease                                                    |
| N74.8 | Female pelvic inflammatory disorders in other diseases classified elsewhere                      |
| N75.1 | Abscess of Bartholin gland                                                                       |
| N76.0 | Acute vaginitis                                                                                  |
| N76.4 | Abscess of vulva                                                                                 |
| N77.0 | Ulceration of vulva in infectious and parasitic diseases classified elsewhere                    |
| N77.1 | Vaginitis, vulvitis and vulvovaginitis in infectious and parasitic diseases classified elsewhere |
| O03.0 | Spontaneous abortion: Incomplete, complicated by genital tract and pelvic infection              |

|       |                                                                                                                             |
|-------|-----------------------------------------------------------------------------------------------------------------------------|
| O03.5 | Spontaneous abortion: Complete or unspecified, complicated by genital tract and pelvic infection                            |
| O04.0 | Medical abortion: Incomplete, complicated by genital tract and pelvic infection                                             |
| O04.5 | Medical abortion: Complete or unspecified, complicated by genital tract and pelvic infection                                |
| O05.0 | Other abortion: Incomplete, complicated by genital tract and pelvic infection                                               |
| O05.5 | Other abortion: Complete or unspecified, complicated by genital tract and pelvic infection                                  |
| O06.0 | Unspecified abortion: Incomplete, complicated by genital tract and pelvic infection                                         |
| O06.5 | Unspecified abortion: Complete or unspecified, complicated by genital tract and pelvic infection                            |
| O07.0 | Failed medical abortion, complicated by genital tract and pelvic infection                                                  |
| O07.5 | Other and unspecified failed attempted abortion, complicated by genital tract and pelvic infection                          |
| O08.0 | Genital tract and pelvic infection following abortion and ectopic and molar pregnancy                                       |
| O23.0 | Infections of kidney in pregnancy                                                                                           |
| O23.1 | Infections of bladder in pregnancy                                                                                          |
| O23.2 | Infections of urethra in pregnancy                                                                                          |
| O23.3 | Infections of other parts of urinary tract in pregnancy                                                                     |
| O23.4 | Unspecified infection of urinary tract in pregnancy                                                                         |
| O23.5 | Infections of the genital tract in pregnancy                                                                                |
| O23.9 | Other and unspecified genitourinary tract infection in pregnancy                                                            |
| O75.3 | Other infection during labour                                                                                               |
| O85*  | Puerperal sepsis                                                                                                            |
| O86*  | Other puerperal infections                                                                                                  |
| O91.0 | Infection of nipple associated with childbirth                                                                              |
| O91.1 | Abscess of breast associated with childbirth                                                                                |
| O98   | Maternal infectious and parasitic diseases classifiable elsewhere but complicating pregnancy, childbirth and the puerperium |
| O98.0 | Tuberculosis complicating pregnancy, childbirth and the puerperium                                                          |
| O98.1 | Syphilis complicating pregnancy, childbirth and the puerperium                                                              |
| O98.2 | Gonorrhoea complicating pregnancy, childbirth and the puerperium                                                            |
| O98.3 | Other infections with a predominantly sexual mode of transmission complicating pregnancy, childbirth and the puerperium     |
| O98.4 | Viral hepatitis complicating pregnancy, childbirth and the puerperium                                                       |
| O98.5 | Other viral diseases complicating pregnancy, childbirth and the puerperium                                                  |
| O98.6 | Protozoal diseases complicating pregnancy, childbirth and the puerperium                                                    |
| O98.7 | Human immunodeficiency virus [HIV] disease complicating pregnancy, childbirth and the puerperium                            |
| O98.8 | Other maternal infectious and parasitic diseases complicating pregnancy, childbirth and the puerperium                      |
| O98.9 | Unspecified maternal infectious or parasitic disease complicating pregnancy, childbirth and the puerperium                  |
| P23   | Congenital pneumonia                                                                                                        |
| P23.0 | Congenital pneumonia due to viral agent                                                                                     |
| P23.1 | Congenital pneumonia due to Chlamydia                                                                                       |
| P23.2 | Congenital pneumonia due to staphylococcus                                                                                  |
| P23.3 | Congenital pneumonia due to streptococcus, group B                                                                          |
| P23.4 | Congenital pneumonia due to Escherichia coli                                                                                |
| P23.5 | Congenital pneumonia due to Pseudomonas                                                                                     |
| P23.6 | Congenital pneumonia due to other bacterial agents                                                                          |
| P23.8 | Congenital pneumonia due to other organisms                                                                                 |
| P23.9 | Congenital pneumonia, unspecified                                                                                           |
| P35.2 | Congenital herpesviral [herpes simplex] infection                                                                           |
| P35.3 | Congenital viral hepatitis                                                                                                  |
| P36   | Bacterial sepsis of newborn                                                                                                 |
| P36.0 | Sepsis of newborn due to streptococcus, group B                                                                             |

|       |                                                                                    |
|-------|------------------------------------------------------------------------------------|
| P36.1 | Sepsis of newborn due to other and unspecified streptococci                        |
| P36.2 | Sepsis of newborn due to Staphylococcus aureus                                     |
| P36.3 | Sepsis of newborn due to other and unspecified staphylococci                       |
| P36.4 | Sepsis of newborn due to Escherichia coli                                          |
| P36.5 | Sepsis of newborn due to anaerobes                                                 |
| P36.8 | Other bacterial sepsis of newborn                                                  |
| P36.9 | Bacterial sepsis of newborn, unspecified                                           |
| P37   | Other congenital infectious and parasitic diseases                                 |
| P37.0 | Congenital tuberculosis                                                            |
| P37.1 | Congenital toxoplasmosis                                                           |
| P37.2 | Neonatal (disseminated) listeriosis                                                |
| P37.3 | Congenital falciparum malaria                                                      |
| P37.4 | Other congenital malaria                                                           |
| P37.5 | Neonatal candidiasis                                                               |
| P37.8 | Other specified congenital infectious and parasitic diseases                       |
| P37.9 | Congenital infectious and parasitic disease, unspecified                           |
| P38*  | Omphalitis of newborn with or without mild haemorrhage                             |
| P39   | Other infections specific to the perinatal period                                  |
| P39.0 | Neonatal infective mastitis                                                        |
| P39.1 | Neonatal conjunctivitis and dacryocystitis                                         |
| P39.2 | Intra-amniotic infection of fetus, not elsewhere classified                        |
| P39.3 | Neonatal urinary tract infection                                                   |
| P39.4 | Neonatal skin infection                                                            |
| P39.8 | Other specified infections specific to the perinatal period                        |
| P39.9 | Infection specific to the perinatal period, unspecified                            |
| R57.2 | Septic shock                                                                       |
| R65.0 | Systemic Inflammatory Response Syndrome of infectious origin without organ failure |
| R65.1 | Systemic Inflammatory Response Syndrome of infectious origin with organ failure    |
| Z21   | Asymptomatic human immunodeficiency virus [HIV] infection status                   |

#### Acute infections

|       |                                         |
|-------|-----------------------------------------|
| A00*  | Cholera                                 |
| A01*  | Typhoid and paratyphoid fevers          |
| A02   | Other salmonella infections             |
| A02.0 | Salmonella enteritis                    |
| A02.1 | Salmonella sepsis                       |
| A02.2 | Localized salmonella infections         |
| A02.8 | Other specified salmonella infections   |
| A02.9 | Salmonella infection, unspecified       |
| A03   | Shigellosis                             |
| A03.0 | Shigellosis due to Shigella dysenteriae |
| A03.1 | Shigellosis due to Shigella flexneri    |
| A03.2 | Shigellosis due to Shigella boydii      |
| A03.3 | Shigellosis due to Shigella sonnei      |
| A03.8 | Other shigellosis                       |

|       |                                                                        |
|-------|------------------------------------------------------------------------|
| A03.9 | Shigellosis, unspecified                                               |
| A04   | Other bacterial intestinal infections                                  |
| A04.0 | Enteropathogenic Escherichia coli infection                            |
| A04.1 | Enterotoxigenic Escherichia coli infection                             |
| A04.2 | Enteroinvasive Escherichia coli infection                              |
| A04.3 | Enterohaemorrhagic Escherichia coli infection                          |
| A04.4 | Other intestinal Escherichia coli infections                           |
| A04.5 | Campylobacter enteritis                                                |
| A04.6 | Enteritis due to Yersinia enterocolitica                               |
| A04.7 | Enterocolitis due to Clostridium difficile                             |
| A04.8 | Other specified bacterial intestinal infections                        |
| A04.9 | Bacterial intestinal infection, unspecified                            |
| A05   | Other bacterial foodborne intoxications, not elsewhere classified      |
| A05.0 | Foodborne staphylococcal intoxication                                  |
| A05.1 | Botulism                                                               |
| A05.2 | Foodborne Clostridium perfringens [Clostridium welchii] intoxication   |
| A05.3 | Foodborne Vibrio parahaemolyticus intoxication                         |
| A05.4 | Foodborne Bacillus cereus intoxication                                 |
| A05.8 | Other specified bacterial foodborne intoxications                      |
| A05.9 | Bacterial foodborne intoxication, unspecified                          |
| A06   | Amoebiasis                                                             |
| A06.0 | Acute amoebic dysentery                                                |
| A06.2 | Amoebic nondysenteric colitis                                          |
| A06.4 | Amoebic liver abscess                                                  |
| A06.5 | Amoebic lung abscess                                                   |
| A06.6 | Amoebic brain abscess                                                  |
| A06.7 | Cutaneous amoebiasis                                                   |
| A06.8 | Amoebic infection of other sites                                       |
| A06.9 | Amoebiasis, unspecified                                                |
| A07*  | Other protozoal intestinal diseases                                    |
| A08.0 | Rotaviral enteritis                                                    |
| A08.1 | Acute gastroenteropathy due to Norwalk agent                           |
| A08.2 | Adenoviral enteritis                                                   |
| A08.3 | Other viral enteritis                                                  |
| A08.4 | Viral intestinal infection, unspecified                                |
| A08.5 | Other specified intestinal infections                                  |
| A09*  | Other gastroenteritis and colitis of infectious and unspecified origin |
| A20   | Plague                                                                 |
| A20.0 | Bubonic plague                                                         |
| A20.1 | Cellulocutaneous plague                                                |
| A20.2 | Pneumonic plague                                                       |
| A20.3 | Plague meningitis                                                      |
| A20.7 | Septicaemic plague                                                     |
| A20.8 | Other forms of plague                                                  |
| A20.9 | Plague, unspecified                                                    |
| A21   | Tularaemia                                                             |
| A21.0 | Ulceroglandular tularaemia                                             |
| A21.1 | Oculoglandular tularaemia                                              |

|       |                                                                       |
|-------|-----------------------------------------------------------------------|
| A21.2 | Pulmonary tularaemia                                                  |
| A21.3 | Gastrointestinal tularaemia                                           |
| A21.7 | Generalized tularaemia                                                |
| A21.8 | Other forms of tularaemia                                             |
| A21.9 | Tularaemia, unspecified                                               |
| A22   | Anthrax                                                               |
| A22.0 | Cutaneous anthrax                                                     |
| A22.1 | Pulmonary anthrax                                                     |
| A22.2 | Gastrointestinal anthrax                                              |
| A22.7 | Anthrax sepsis                                                        |
| A22.8 | Other forms of anthrax                                                |
| A22.9 | Anthrax, unspecified                                                  |
| A23   | Brucellosis                                                           |
| A23.0 | Brucellosis due to <i>Brucella melitensis</i>                         |
| A23.1 | Brucellosis due to <i>Brucella abortus</i>                            |
| A23.2 | Brucellosis due to <i>Brucella suis</i>                               |
| A23.3 | Brucellosis due to <i>Brucella canis</i>                              |
| A23.8 | Other brucellosis                                                     |
| A23.9 | Brucellosis, unspecified                                              |
| A24   | Glanders and melioidosis                                              |
| A24.0 | Glanders                                                              |
| A24.1 | Acute and fulminating melioidosis                                     |
| A24.2 | Subacute and chronic melioidosis                                      |
| A24.3 | Other melioidosis                                                     |
| A25   | Rat-bite fevers                                                       |
| A25.0 | Spirillosis                                                           |
| A25.1 | Streptobacillosis                                                     |
| A25.9 | Rat-bite fever, unspecified                                           |
| A26   | Erysipeloid                                                           |
| A26.0 | Cutaneous erysipeloid                                                 |
| A26.7 | Erysipelothrix sepsis                                                 |
| A26.8 | Other forms of erysipeloid                                            |
| A26.9 | Erysipeloid, unspecified                                              |
| A27*  | Leptospirosis                                                         |
| A28   | Other zoonotic bacterial diseases, not elsewhere classified           |
| A28.0 | Pasteurellosis                                                        |
| A28.1 | Cat-scratch disease                                                   |
| A28.2 | Extraintestinal yersiniosis                                           |
| A28.8 | Other specified zoonotic bacterial diseases, not elsewhere classified |
| A28.9 | Zoonotic bacterial disease, unspecified                               |
| A32   | Listeriosis                                                           |
| A32.0 | Cutaneous listeriosis                                                 |
| A32.1 | Listerial meningitis and meningoencephalitis                          |
| A32.7 | Listerial sepsis                                                      |
| A32.8 | Other forms of listeriosis                                            |
| A32.9 | Listeriosis, unspecified                                              |
| A33*  | Tetanus neonatorum                                                    |
| A34*  | Obstetrical tetanus                                                   |

|       |                                                    |
|-------|----------------------------------------------------|
| A35*  | Other tetanus                                      |
| A36*  | Diphtheria                                         |
| A37*  | Whooping cough                                     |
| A38*  | Scarlet fever                                      |
| A39   | Meningococcal infection                            |
| A39.0 | Meningococcal meningitis                           |
| A39.1 | Waterhouse-Friderichsen syndrome                   |
| A39.2 | Acute meningococcaemia                             |
| A39.4 | Meningococcaemia, unspecified                      |
| A39.5 | Meningococcal heart disease                        |
| A39.8 | Other meningococcal infections                     |
| A39.9 | Meningococcal infection, unspecified               |
| A40   | Streptococcal sepsis                               |
| A40.0 | Sepsis due to streptococcus, group A               |
| A40.1 | Sepsis due to streptococcus, group B               |
| A40.2 | Sepsis due to streptococcus, group D               |
| A40.3 | Sepsis due to Streptococcus pneumoniae             |
| A40.8 | Other streptococcal sepsis                         |
| A40.9 | Streptococcal sepsis, unspecified                  |
| A41   | Other sepsis                                       |
| A41.0 | Sepsis due to Staphylococcus aureus                |
| A41.1 | Sepsis due to other specified staphylococcus       |
| A41.2 | Sepsis due to unspecified staphylococcus           |
| A41.3 | Sepsis due to Haemophilus influenzae               |
| A41.4 | Sepsis due to anaerobes                            |
| A41.5 | Sepsis due to other Gram-negative organisms        |
| A41.8 | Other specified sepsis                             |
| A41.9 | Sepsis, unspecified                                |
| A43   | Nocardiosis                                        |
| A43.0 | Pulmonary nocardiosis                              |
| A43.1 | Cutaneous nocardiosis                              |
| A43.8 | Other forms of nocardiosis                         |
| A44   | Bartonellosis                                      |
| A44.0 | Systemic bartonellosis                             |
| A44.8 | Other forms of bartonellosis                       |
| A44.9 | Bartonellosis, unspecified                         |
| A46*  | Erysipelas                                         |
| A48.0 | Gas gangrene                                       |
| A48.1 | Legionnaires disease                               |
| A48.2 | Nonpneumonic Legionnaires disease [Pontiac fever]  |
| A48.3 | Toxic shock syndrome                               |
| A48.4 | Brazilian purpuric fever                           |
| A48.8 | Other specified bacterial diseases                 |
| A49   | Bacterial infection of unspecified site            |
| A49.0 | Staphylococcal infection, unspecified site         |
| A49.1 | Streptococcal infection, unspecified site          |
| A49.2 | Haemophilus influenzae infection, unspecified site |
| A49.3 | Mycoplasma infection, unspecified site             |

|       |                                                                                                   |
|-------|---------------------------------------------------------------------------------------------------|
| A49.8 | Other bacterial infections of unspecified site                                                    |
| A49.9 | Bacterial infection, unspecified                                                                  |
| A54   | Gonococcal infection                                                                              |
| A54.0 | Gonococcal infection of lower genitourinary tract without periurethral or accessory gland abscess |
| A54.1 | Gonococcal infection of lower genitourinary tract with periurethral and accessory gland abscess   |
| A54.2 | Gonococcal pelviperitonitis and other gonococcal genitourinary infections                         |
| A54.3 | Gonococcal infection of eye                                                                       |
| A54.4 | Gonococcal infection of musculoskeletal system                                                    |
| A54.5 | Gonococcal pharyngitis                                                                            |
| A54.6 | Gonococcal infection of anus and rectum                                                           |
| A54.8 | Other gonococcal infections                                                                       |
| A54.9 | Gonococcal infection, unspecified                                                                 |
| A55*  | Chlamydial lymphogranuloma (venereum)                                                             |
| A56.0 | Chlamydial infection of lower genitourinary tract                                                 |
| A56.1 | Chlamydial infection of pelviperitoneum and other genitourinary organs                            |
| A56.2 | Chlamydial infection of genitourinary tract, unspecified                                          |
| A56.3 | Chlamydial infection of anus and rectum                                                           |
| A56.4 | Chlamydial infection of pharynx                                                                   |
| A56.8 | Sexually transmitted chlamydial infection of other sites                                          |
| A57*  | Chancroid                                                                                         |
| A59*  | Trichomoniasis                                                                                    |
| A63.8 | Other specified predominantly sexually transmitted diseases                                       |
| A64*  | Unspecified sexually transmitted disease                                                          |
| A68*  | Relapsing fevers                                                                                  |
| A69   | Other spirochaetal infections                                                                     |
| A69.0 | Necrotizing ulcerative stomatitis                                                                 |
| A69.1 | Other Vincent infections                                                                          |
| A69.2 | Lyme disease                                                                                      |
| A69.8 | Other specified spirochaetal infections                                                           |
| A69.9 | Spirochaetal infection, unspecified                                                               |
| A70*  | Chlamydia psittaci infection                                                                      |
| A71*  | Trachoma                                                                                          |
| A74.0 | Chlamydial conjunctivitis                                                                         |
| A74.8 | Other chlamydial diseases                                                                         |
| A74.9 | Chlamydial infection, unspecified                                                                 |
| A75   | Typhus fever                                                                                      |
| A75.0 | Epidemic louse-borne typhus fever due to Rickettsia prowazekii                                    |
| A75.2 | Typhus fever due to Rickettsia typhi                                                              |
| A75.3 | Typhus fever due to Rickettsia tsutsugamushi                                                      |
| A75.9 | Typhus fever, unspecified                                                                         |
| A77   | Spotted fever [tick-borne rickettsioses]                                                          |
| A77.0 | Spotted fever due to Rickettsia rickettsii                                                        |
| A77.1 | Spotted fever due to Rickettsia conorii                                                           |
| A77.2 | Spotted fever due to Rickettsia sibirica                                                          |
| A77.3 | Spotted fever due to Rickettsia australis                                                         |
| A77.8 | Other spotted fevers                                                                              |
| A77.9 | Spotted fever, unspecified                                                                        |
| A78*  | Q fever                                                                                           |



|       |                                                                            |
|-------|----------------------------------------------------------------------------|
| A79   | Other rickettsioses                                                        |
| A79.0 | Trench fever                                                               |
| A79.1 | Rickettsialpox due to Rickettsia akari                                     |
| A79.8 | Other specified rickettsioses                                              |
| A79.9 | Rickettsiosis, unspecified                                                 |
| A80*  | Acute poliomyelitis                                                        |
| A83*  | Mosquito-borne viral encephalitis                                          |
| A84*  | Tick-borne viral encephalitis                                              |
| A85*  | Other viral encephalitis, not elsewhere classified                         |
| A86*  | Unspecified viral encephalitis                                             |
| A87*  | Viral meningitis                                                           |
| A88*  | Other viral infections of central nervous system, not elsewhere classified |
| A89*  | Unspecified viral infection of central nervous system                      |
| A90*  | Dengue fever [classical dengue]                                            |
| A91*  | Dengue haemorrhagic fever                                                  |
| A92   | Other mosquito-borne viral fevers                                          |
| A92.0 | Chikungunya virus disease                                                  |
| A92.1 | O'nyong-nyong fever                                                        |
| A92.2 | Venezuelan equine fever                                                    |
| A92.3 | West Nile virus infection                                                  |
| A92.4 | Rift Valley fever                                                          |
| A92.8 | Other specified mosquito-borne viral fevers                                |
| A92.9 | Mosquito-borne viral fever, unspecified                                    |
| A93   | Other arthropod-borne viral fevers, not elsewhere classified               |
| A93.0 | Oropouche virus disease                                                    |
| A93.1 | Sandfly fever                                                              |
| A93.2 | Colorado tick fever                                                        |
| A93.8 | Other specified arthropod-borne viral fevers                               |
| A94*  | Unspecified arthropod-borne viral fever                                    |
| A95*  | Yellow fever                                                               |
| A96*  | Arenaviral haemorrhagic fever                                              |
| A97*  | Dengue                                                                     |
| A98   | Other viral haemorrhagic fevers, not elsewhere classified                  |
| A98.0 | Crimean-Congo haemorrhagic fever                                           |
| A98.1 | Omsk haemorrhagic fever                                                    |
| A98.2 | Kyasanur Forest disease                                                    |
| A98.3 | Marburg virus disease                                                      |
| A98.4 | Ebola virus disease                                                        |
| A98.5 | Haemorrhagic fever with renal syndrome                                     |
| A98.8 | Other specified viral haemorrhagic fevers                                  |
| A99*  | Unspecified viral haemorrhagic fever                                       |
| B04*  | Monkeypox                                                                  |
| B05   | Measles                                                                    |
| B05.0 | Measles complicated by encephalitis                                        |
| B05.1 | Measles complicated by meningitis                                          |
| B05.2 | Measles complicated by pneumonia                                           |
| B05.3 | Measles complicated by otitis media                                        |
| B05.4 | Measles with intestinal complications                                      |

|       |                                                                                    |
|-------|------------------------------------------------------------------------------------|
| B05.8 | Measles with other complications                                                   |
| B05.9 | Measles without complication                                                       |
| B06   | Rubella [German measles]                                                           |
| B06.0 | Rubella with neurological complications                                            |
| B06.8 | Rubella with other complications                                                   |
| B06.9 | Rubella without complication                                                       |
| B07*  | Viral warts                                                                        |
| B08.0 | Other orthopoxvirus infections                                                     |
| B08.1 | Molluscum contagiosum                                                              |
| B08.3 | Erythema infectiosum [fifth disease]                                               |
| B08.4 | Enteroviral vesicular stomatitis with exanthem                                     |
| B08.5 | Enteroviral vesicular pharyngitis                                                  |
| B08.8 | Other specified viral infections characterized by skin and mucous membrane lesions |
| B09*  | Unspecified viral infection characterized by skin and mucous membrane lesions      |
| B15   | Acute hepatitis A                                                                  |
| B15.0 | Hepatitis A with hepatic coma                                                      |
| B15.9 | Hepatitis A without hepatic coma                                                   |
| B16   | Acute hepatitis B                                                                  |
| B16.0 | Acute hepatitis B with delta-agent (coinfection) with hepatic coma                 |
| B16.1 | Acute hepatitis B with delta-agent (coinfection) without hepatic coma              |
| B16.2 | Acute hepatitis B without delta-agent with hepatic coma                            |
| B16.9 | Acute hepatitis B without delta-agent and without hepatic coma                     |
| B17*  | Other acute viral hepatitis                                                        |
| B19   | Unspecified viral hepatitis                                                        |
| B19.0 | Unspecified viral hepatitis with hepatic coma                                      |
| B19.9 | Unspecified viral hepatitis without hepatic coma                                   |
| B26   | Mumps                                                                              |
| B26.0 | Mumps orchitis                                                                     |
| B26.1 | Mumps meningitis                                                                   |
| B26.2 | Mumps encephalitis                                                                 |
| B26.3 | Mumps pancreatitis                                                                 |
| B26.8 | Mumps with other complications                                                     |
| B26.9 | Mumps without complication                                                         |
| B27.8 | Other infectious mononucleosis                                                     |
| B30*  | Viral conjunctivitis                                                               |
| B33   | Other viral diseases, not elsewhere classified                                     |
| B33.0 | Epidemic myalgia                                                                   |
| B33.1 | Ross River disease                                                                 |
| B33.2 | Viral carditis                                                                     |
| B33.4 | Hantavirus (cardio-)pulmonary syndrome [HPS] [HCPS]                                |
| B33.8 | Other specified viral diseases                                                     |
| B34   | Viral infection of unspecified site                                                |
| B34.0 | Adenovirus infection, unspecified site                                             |
| B34.1 | Enterovirus infection, unspecified site                                            |
| B34.2 | Coronavirus infection, unspecified site                                            |
| B34.3 | Parvovirus infection, unspecified site                                             |
| B34.8 | Other viral infections of unspecified site                                         |
| B34.9 | Viral infection, unspecified                                                       |

|       |                                                                                             |
|-------|---------------------------------------------------------------------------------------------|
| B50*  | Plasmodium falciparum malaria                                                               |
| B50.0 | Plasmodium falciparum malaria with cerebral complications                                   |
| B50.8 | Other severe and complicated Plasmodium falciparum malaria                                  |
| B50.9 | Plasmodium falciparum malaria, unspecified                                                  |
| B52*  | Plasmodium malariae malaria                                                                 |
| B53   | Other parasitologically confirmed malaria                                                   |
| B53.1 | Malaria due to simian plasmodia                                                             |
| B53.8 | Other parasitologically confirmed malaria, not elsewhere classified                         |
| B54*  | Unspecified malaria                                                                         |
| B55.1 | Cutaneous leishmaniasis                                                                     |
| B55.9 | Leishmaniasis, unspecified                                                                  |
| B60.0 | Babesiosis                                                                                  |
| B60.1 | Acanthamoebiasis                                                                            |
| B60.2 | Naegleriasis                                                                                |
| B60.8 | Other specified protozoal diseases                                                          |
| B64*  | Unspecified protozoal disease                                                               |
| B66   | Other fluke infections                                                                      |
| B66.5 | Fasciolopsiasis                                                                             |
| B66.8 | Other specified fluke infections                                                            |
| B66.9 | Fluke infection, unspecified                                                                |
| B71.8 | Other specified cestode infections                                                          |
| B81   | Other intestinal helminthiases, not elsewhere classified                                    |
| B81.0 | Anisakiasis                                                                                 |
| B81.3 | Intestinal angiostrongyliasis                                                               |
| B81.4 | Mixed intestinal helminthiases                                                              |
| B81.8 | Other specified intestinal helminthiases                                                    |
| B82   | Unspecified intestinal parasitism                                                           |
| B82.0 | Intestinal helminthiasis, unspecified                                                       |
| B82.9 | Intestinal parasitism, unspecified                                                          |
| B83   | Other helminthiases                                                                         |
| B83.0 | Visceral larva migrans                                                                      |
| B83.2 | Angiostrongyliasis due to <i>Parastrongylus cantonensis</i>                                 |
| B83.4 | Internal hirudiniasis                                                                       |
| B83.8 | Other specified helminthiases                                                               |
| B83.9 | Helminthiasis, unspecified                                                                  |
| B87*  | Myiasis                                                                                     |
| B88   | Other infestations                                                                          |
| B88.0 | Other acarasis                                                                              |
| B88.1 | Tungiasis [sandflea infestation]                                                            |
| B88.2 | Other arthropod infestations                                                                |
| B88.3 | External hirudiniasis                                                                       |
| B88.8 | Other specified infestations                                                                |
| B88.9 | Infestation, unspecified                                                                    |
| B89*  | Unspecified parasitic disease                                                               |
| B95*  | Streptococcus and staphylococcus as the cause of diseases classified to other chapters      |
| B96.0 | Mycoplasma pneumoniae [M. pneumoniae] as the cause of diseases classified to other chapters |
| B96.1 | Klebsiella pneumoniae [K. pneumoniae] as the cause of diseases classified to other chapters |
| B96.2 | Escherichia coli [E. coli] as the cause of diseases classified to other chapters            |

|       |                                                                                                              |
|-------|--------------------------------------------------------------------------------------------------------------|
| B96.3 | Haemophilus influenzae [H. influenzae] as the cause of diseases classified to other chapters                 |
| B96.4 | Proteus (mirabilis)(morganii) as the cause of diseases classified to other chapters                          |
| B96.5 | Pseudomonas (aeruginosa) as the cause of diseases classified to other chapters                               |
| B96.6 | Bacillus fragilis [B. fragilis] as the cause of diseases classified to other chapters                        |
| B96.7 | Clostridium perfringens [C. perfringens] as the cause of diseases classified to other chapters               |
| B96.8 | Other specified bacterial agents as the cause of diseases classified to other chapters                       |
| B97   | Viral agents as the cause of diseases classified to other chapters                                           |
| B97.0 | Adenovirus as the cause of diseases classified to other chapters                                             |
| B97.1 | Enterovirus as the cause of diseases classified to other chapters                                            |
| B97.2 | Coronavirus as the cause of diseases classified to other chapters                                            |
| B97.4 | Respiratory syncytial virus as the cause of diseases classified to other chapters                            |
| B97.5 | Reovirus as the cause of diseases classified to other chapters                                               |
| B97.6 | Parvovirus as the cause of diseases classified to other chapters                                             |
| B97.8 | Other viral agents as the cause of diseases classified to other chapters                                     |
| B98.1 | Vibrio vulnificus as the cause of diseases classified to other chapters                                      |
| B99*  | Other and unspecified infectious diseases                                                                    |
| D73.3 | Abscess of spleen                                                                                            |
| E32.1 | Abscess of thymus                                                                                            |
| G00   | Bacterial meningitis, not elsewhere classified                                                               |
| G00.0 | Haemophilus meningitis                                                                                       |
| G00.1 | Pneumococcal meningitis                                                                                      |
| G00.2 | Streptococcal meningitis                                                                                     |
| G00.3 | Staphylococcal meningitis                                                                                    |
| G00.8 | Other bacterial meningitis                                                                                   |
| G00.9 | Bacterial meningitis, unspecified                                                                            |
| G01*  | Meningitis in bacterial diseases classified elsewhere                                                        |
| G02.0 | Meningitis in viral diseases classified elsewhere                                                            |
| G02.8 | Meningitis in other specified infectious and parasitic diseases classified elsewhere                         |
| G03*  | Meningitis due to other and unspecified causes                                                               |
| G04.2 | Bacterial meningoencephalitis and meningomyelitis, not elsewhere classified                                  |
| G05.0 | Encephalitis, myelitis and encephalomyelitis in bacterial diseases classified elsewhere                      |
| G05.1 | Encephalitis, myelitis and encephalomyelitis in viral diseases classified elsewhere                          |
| G05.2 | Encephalitis, myelitis and encephalomyelitis in other infectious and parasitic diseases classified elsewhere |
| G06*  | Intracranial and intraspinal abscess and granuloma                                                           |
| G07*  | Intracranial and intraspinal abscess and granuloma in diseases classified elsewhere                          |
| H00*  | Hordeolum and chalazion                                                                                      |
| H01.0 | Blepharitis                                                                                                  |
| H05.0 | Acute inflammation of orbit                                                                                  |
| H06.1 | Parasitic infestation of orbit in diseases classified elsewhere                                              |
| H10.0 | Mucopurulent conjunctivitis                                                                                  |
| H10.5 | Blepharoconjunctivitis                                                                                       |
| H19.0 | Scleritis and episcleritis in diseases classified elsewhere                                                  |
| H19.2 | Keratitis and keratoconjunctivitis in other infectious and parasitic diseases classified elsewhere           |
| H22.0 | Iridocyclitis in infectious and parasitic diseases classified elsewhere                                      |
| H32.0 | Chorioretinal inflammation in infectious and parasitic diseases classified elsewhere                         |
| H44.0 | Purulent endophthalmitis                                                                                     |
| H60.0 | Abscess of external ear                                                                                      |
| H60.1 | Cellulitis of external ear                                                                                   |

|       |                                                                                       |
|-------|---------------------------------------------------------------------------------------|
| H60.2 | Malignant otitis externa                                                              |
| H60.3 | Other infective otitis externa                                                        |
| H62.0 | Otitis externa in bacterial diseases classified elsewhere                             |
| H62.1 | Otitis externa in viral diseases classified elsewhere                                 |
| H62.3 | Otitis externa in other infectious and parasitic diseases classified elsewhere        |
| H66.0 | Acute suppurative otitis media                                                        |
| H67.0 | Otitis media in bacterial diseases classified elsewhere                               |
| H67.1 | Otitis media in viral diseases classified elsewhere                                   |
| H70.0 | Acute mastoiditis                                                                     |
| H75.0 | Mastoiditis in infectious and parasitic diseases classified elsewhere                 |
| I30.1 | Infective pericarditis                                                                |
| I32.0 | Pericarditis in bacterial diseases classified elsewhere                               |
| I32.1 | Pericarditis in other infectious and parasitic diseases classified elsewhere          |
| I33.0 | Acute and subacute infective endocarditis                                             |
| I40.0 | Infective myocarditis                                                                 |
| I41.0 | Myocarditis in bacterial diseases classified elsewhere                                |
| I41.1 | Myocarditis in viral diseases classified elsewhere                                    |
| I41.2 | Myocarditis in other infectious and parasitic diseases classified elsewhere           |
| I43.0 | Cardiomyopathy in infectious and parasitic diseases classified elsewhere              |
| I52.0 | Other heart disorders in bacterial diseases classified elsewhere                      |
| I52.1 | Other heart disorders in other infectious and parasitic diseases classified elsewhere |
| I68.1 | Cerebral arteritis in infectious and parasitic diseases classified elsewhere          |
| J01.0 | Acute maxillary sinusitis                                                             |
| J02   | Acute pharyngitis                                                                     |
| J02.0 | Streptococcal pharyngitis                                                             |
| J02.8 | Acute pharyngitis due to other specified organisms                                    |
| J02.9 | Acute pharyngitis, unspecified                                                        |
| J03   | Acute tonsillitis                                                                     |
| J03.0 | Streptococcal tonsillitis                                                             |
| J03.8 | Acute tonsillitis due to other specified organisms                                    |
| J03.9 | Acute tonsillitis, unspecified                                                        |
| J04*  | Acute laryngitis and tracheitis                                                       |
| J05.1 | Acute epiglottitis                                                                    |
| J09*  | Influenza due to certain identified influenza virus                                   |
| J10*  | Influenza due to other identified influenza virus                                     |
| J11*  | Influenza, virus not identified                                                       |
| J12*  | Viral pneumonia, not elsewhere classified                                             |
| J13*  | Pneumonia due to Streptococcus pneumoniae                                             |
| J14*  | Pneumonia due to Haemophilus influenzae                                               |
| J15   | Bacterial pneumonia, not elsewhere classified                                         |
| J15.0 | Pneumonia due to Klebsiella pneumoniae                                                |
| J15.1 | Pneumonia due to Pseudomonas                                                          |
| J15.2 | Pneumonia due to staphylococcus                                                       |
| J15.3 | Pneumonia due to streptococcus, group B                                               |
| J15.4 | Pneumonia due to other streptococci                                                   |
| J15.5 | Pneumonia due to Escherichia coli                                                     |
| J15.6 | Pneumonia due to other aerobic Gram-negative bacteria                                 |
| J15.7 | Pneumonia due to Mycoplasma pneumoniae                                                |

|       |                                                                                     |
|-------|-------------------------------------------------------------------------------------|
| J15.8 | Other bacterial pneumonia                                                           |
| J15.9 | Bacterial pneumonia, unspecified                                                    |
| J16   | Pneumonia due to other infectious organisms, not elsewhere classified               |
| J16.0 | Chlamydial pneumonia                                                                |
| J16.8 | Pneumonia due to other specified infectious organisms                               |
| J17.0 | Pneumonia in bacterial diseases classified elsewhere                                |
| J17.1 | Pneumonia in viral diseases classified elsewhere                                    |
| J17.8 | Pneumonia in other diseases classified elsewhere                                    |
| J18*  | Pneumonia, organism unspecified                                                     |
| J20   | Acute bronchitis                                                                    |
| J20.0 | Acute bronchitis due to Mycoplasma pneumoniae                                       |
| J20.1 | Acute bronchitis due to Haemophilus influenzae                                      |
| J20.2 | Acute bronchitis due to streptococcus                                               |
| J20.3 | Acute bronchitis due to coxsackievirus                                              |
| J20.4 | Acute bronchitis due to parainfluenza virus                                         |
| J20.5 | Acute bronchitis due to respiratory syncytial virus                                 |
| J20.6 | Acute bronchitis due to rhinovirus                                                  |
| J20.7 | Acute bronchitis due to echovirus                                                   |
| J20.8 | Acute bronchitis due to other specified organisms                                   |
| J20.9 | Acute bronchitis, unspecified                                                       |
| J21*  | Acute bronchiolitis                                                                 |
| J21.0 | Acute bronchiolitis due to respiratory syncytial virus                              |
| J21.1 | Acute bronchiolitis due to human metapneumovirus                                    |
| J21.8 | Acute bronchiolitis due to other specified organisms                                |
| J21.9 | Acute bronchiolitis, unspecified                                                    |
| J22*  | Unspecified acute lower respiratory infection                                       |
| J36*  | Peritonsillar abscess                                                               |
| J39.0 | Retropharyngeal and parapharyngeal abscess                                          |
| J39.1 | Other abscess of pharynx                                                            |
| J85.1 | Abscess of lung with pneumonia                                                      |
| J85.2 | Abscess of lung without pneumonia                                                   |
| J85.3 | Abscess of mediastinum                                                              |
| J86*  | Pyothorax                                                                           |
| K04.4 | Acute apical periodontitis of pulpal origin                                         |
| K04.7 | Periapical abscess without sinus                                                    |
| K05.0 | Acute gingivitis                                                                    |
| K05.2 | Acute periodontitis                                                                 |
| K11.3 | Abscess of salivary gland                                                           |
| K12.2 | Cellulitis and abscess of mouth                                                     |
| K35*  | Acute appendicitis                                                                  |
| K57.0 | Diverticular disease of small intestine with perforation and abscess                |
| K57.2 | Diverticular disease of large intestine with perforation and abscess                |
| K57.4 | Diverticular disease of both small and large intestine with perforation and abscess |
| K57.8 | Diverticular disease of intestine, part unspecified, with perforation and abscess   |
| K61*  | Abscess of anal and rectal regions                                                  |
| K63.0 | Abscess of intestine                                                                |
| K65.0 | Acute peritonitis                                                                   |
| K67.0 | Chlamydial peritonitis                                                              |

|       |                                                                                                |
|-------|------------------------------------------------------------------------------------------------|
| K67.1 | Gonococcal peritonitis                                                                         |
| K67.8 | Other disorders of peritoneum in infectious diseases classified elsewhere                      |
| K75.0 | Abscess of liver                                                                               |
| K77.0 | Liver disorders in infectious and parasitic diseases classified elsewhere                      |
| L00*  | Staphylococcal scalded skin syndrome                                                           |
| L01*  | Impetigo                                                                                       |
| L02*  | Cutaneous abscess, furuncle and carbuncle                                                      |
| L03*  | Cellulitis                                                                                     |
| L04*  | Acute lymphadenitis                                                                            |
| L05*  | Pilonidal cyst                                                                                 |
| L08*  | Other local infections of skin and subcutaneous tissue                                         |
| M00   | Pyogenic arthritis                                                                             |
| M00.0 | Staphylococcal arthritis and polyarthritis                                                     |
| M00.1 | Pneumococcal arthritis and polyarthritis                                                       |
| M00.2 | Other streptococcal arthritis and polyarthritis                                                |
| M00.8 | Arthritis and polyarthritis due to other specified bacterial agents                            |
| M00.9 | Pyogenic arthritis, unspecified                                                                |
| M01.0 | Meningococcal arthritis                                                                        |
| M01.2 | Arthritis in Lyme disease                                                                      |
| M01.3 | Arthritis in other bacterial diseases classified elsewhere                                     |
| M01.4 | Rubella arthritis                                                                              |
| M01.5 | Arthritis in other viral diseases classified elsewhere                                         |
| M01.8 | Arthritis in other infectious and parasitic diseases classified elsewhere                      |
| M46.2 | Osteomyelitis of vertebra                                                                      |
| M46.3 | Infection of intervertebral disc (pyogenic)                                                    |
| M46.5 | Other infective spondylopathies                                                                |
| M49.1 | Brucella spondylitis                                                                           |
| M49.2 | Enterobacterial spondylitis                                                                    |
| M49.3 | Spondylopathy in other infectious and parasitic diseases classified elsewhere                  |
| M60.0 | Infective myositis                                                                             |
| M63.0 | Myositis in bacterial diseases classified elsewhere                                            |
| M63.2 | Myositis in other infectious diseases classified elsewhere                                     |
| M65.0 | Abscess of tendon sheath                                                                       |
| M65.1 | Other infective (teno)synovitis                                                                |
| M71.0 | Abscess of bursa                                                                               |
| M71.1 | Other infective bursitis                                                                       |
| M72.6 | Necrotizing fasciitis                                                                          |
| M73.0 | Gonococcal bursitis                                                                            |
| M86*  | Osteomyelitis                                                                                  |
| M86.0 | Acute haematogenous osteomyelitis                                                              |
| M86.1 | Other acute osteomyelitis                                                                      |
| M86.9 | Osteomyelitis, unspecified                                                                     |
| N08.0 | Glomerular disorders in infectious and parasitic diseases classified elsewhere                 |
| N10*  | Acute tubulo-interstitial nephritis                                                            |
| N13.6 | Pyonephrosis                                                                                   |
| N15.1 | Renal and perinephric abscess                                                                  |
| N16.0 | Renal tubulo-interstitial disorders in infectious and parasitic diseases classified elsewhere  |
| N29.1 | Other disorders of kidney and ureter in infectious and parasitic diseases classified elsewhere |

|       |                                                                                                                             |
|-------|-----------------------------------------------------------------------------------------------------------------------------|
| N30.0 | Acute cystitis                                                                                                              |
| N34.0 | Urethral abscess                                                                                                            |
| N39.0 | Urinary tract infection, site not specified                                                                                 |
| N41.0 | Acute prostatitis                                                                                                           |
| N41.2 | Abscess of prostate                                                                                                         |
| N45*  | Orchitis and epididymitis                                                                                                   |
| N61*  | Inflammatory disorders of breast                                                                                            |
| N70.0 | Acute salpingitis and oophoritis                                                                                            |
| N71.0 | Acute inflammatory disease of uterus                                                                                        |
| N73.0 | Acute parametritis and pelvic cellulitis                                                                                    |
| N73.3 | Female acute pelvic peritonitis                                                                                             |
| N74   | Female pelvic inflammatory disorders in diseases classified elsewhere                                                       |
| N74.3 | Female gonococcal pelvic inflammatory disease                                                                               |
| N74.4 | Female chlamydial pelvic inflammatory disease                                                                               |
| N74.8 | Female pelvic inflammatory disorders in other diseases classified elsewhere                                                 |
| N75.1 | Abscess of Bartholin gland                                                                                                  |
| N76.0 | Acute vaginitis                                                                                                             |
| N76.4 | Abscess of vulva                                                                                                            |
| N77.0 | Ulceration of vulva in infectious and parasitic diseases classified elsewhere                                               |
| N77.1 | Vaginitis, vulvitis and vulvovaginitis in infectious and parasitic diseases classified elsewhere                            |
| O03.0 | Spontaneous abortion: Incomplete, complicated by genital tract and pelvic infection                                         |
| O03.5 | Spontaneous abortion: Complete or unspecified, complicated by genital tract and pelvic infection                            |
| O04.0 | Medical abortion: Incomplete, complicated by genital tract and pelvic infection                                             |
| O04.5 | Medical abortion: Complete or unspecified, complicated by genital tract and pelvic infection                                |
| O05.0 | Other abortion: Incomplete, complicated by genital tract and pelvic infection                                               |
| O05.5 | Other abortion: Complete or unspecified, complicated by genital tract and pelvic infection                                  |
| O06.0 | Unspecified abortion: Incomplete, complicated by genital tract and pelvic infection                                         |
| O06.5 | Unspecified abortion: Complete or unspecified, complicated by genital tract and pelvic infection                            |
| O07.0 | Failed medical abortion, complicated by genital tract and pelvic infection                                                  |
| O07.5 | Other and unspecified failed attempted abortion, complicated by genital tract and pelvic infection                          |
| O08.0 | Genital tract and pelvic infection following abortion and ectopic and molar pregnancy                                       |
| O23.0 | Infections of kidney in pregnancy                                                                                           |
| O23.1 | Infections of bladder in pregnancy                                                                                          |
| O23.2 | Infections of urethra in pregnancy                                                                                          |
| O23.3 | Infections of other parts of urinary tract in pregnancy                                                                     |
| O23.4 | Unspecified infection of urinary tract in pregnancy                                                                         |
| O23.5 | Infections of the genital tract in pregnancy                                                                                |
| O23.9 | Other and unspecified genitourinary tract infection in pregnancy                                                            |
| O75.3 | Other infection during labour                                                                                               |
| O85*  | Puerperal sepsis                                                                                                            |
| O86*  | Other puerperal infections                                                                                                  |
| O91.0 | Infection of nipple associated with childbirth                                                                              |
| O91.1 | Abscess of breast associated with childbirth                                                                                |
| O98   | Maternal infectious and parasitic diseases classifiable elsewhere but complicating pregnancy, childbirth and the puerperium |
| O98.2 | Gonorrhoea complicating pregnancy, childbirth and the puerperium                                                            |
| O98.3 | Other infections with a predominantly sexual mode of transmission complicating pregnancy, childbirth and the puerperium     |
| O98.4 | Viral hepatitis complicating pregnancy, childbirth and the puerperium                                                       |
| O98.5 | Other viral diseases complicating pregnancy, childbirth and the puerperium                                                  |



|       |                                                                                                            |
|-------|------------------------------------------------------------------------------------------------------------|
| O98.6 | Protozoal diseases complicating pregnancy, childbirth and the puerperium                                   |
| O98.8 | Other maternal infectious and parasitic diseases complicating pregnancy, childbirth and the puerperium     |
| O98.9 | Unspecified maternal infectious or parasitic disease complicating pregnancy, childbirth and the puerperium |
| P23   | Congenital pneumonia                                                                                       |
| P23.0 | Congenital pneumonia due to viral agent                                                                    |
| P23.1 | Congenital pneumonia due to Chlamydia                                                                      |
| P23.2 | Congenital pneumonia due to staphylococcus                                                                 |
| P23.3 | Congenital pneumonia due to streptococcus, group B                                                         |
| P23.4 | Congenital pneumonia due to Escherichia coli                                                               |
| P23.5 | Congenital pneumonia due to Pseudomonas                                                                    |
| P23.6 | Congenital pneumonia due to other bacterial agents                                                         |
| P23.8 | Congenital pneumonia due to other organisms                                                                |
| P23.9 | Congenital pneumonia, unspecified                                                                          |
| P35.0 | Congenital rubella syndrome                                                                                |
| P36   | Bacterial sepsis of newborn                                                                                |
| P36.0 | Sepsis of newborn due to streptococcus, group B                                                            |
| P36.1 | Sepsis of newborn due to other and unspecified streptococci                                                |
| P36.2 | Sepsis of newborn due to Staphylococcus aureus                                                             |
| P36.3 | Sepsis of newborn due to other and unspecified staphylococci                                               |
| P36.4 | Sepsis of newborn due to Escherichia coli                                                                  |
| P36.5 | Sepsis of newborn due to anaerobes                                                                         |
| P36.8 | Other bacterial sepsis of newborn                                                                          |
| P36.9 | Bacterial sepsis of newborn, unspecified                                                                   |
| P37   | Other congenital infectious and parasitic diseases                                                         |
| P37.2 | Neonatal (disseminated) listeriosis                                                                        |
| P37.3 | Congenital falciparum malaria                                                                              |
| P37.4 | Other congenital malaria                                                                                   |
| P37.8 | Other specified congenital infectious and parasitic diseases                                               |
| P37.9 | Congenital infectious and parasitic disease, unspecified                                                   |
| P38*  | Omphalitis of newborn with or without mild haemorrhage                                                     |
| P39   | Other infections specific to the perinatal period                                                          |
| P39.0 | Neonatal infective mastitis                                                                                |
| P39.1 | Neonatal conjunctivitis and dacryocystitis                                                                 |
| P39.2 | Intra-amniotic infection of fetus, not elsewhere classified                                                |
| P39.3 | Neonatal urinary tract infection                                                                           |
| P39.4 | Neonatal skin infection                                                                                    |
| P39.8 | Other specified infections specific to the perinatal period                                                |
| P39.9 | Infection specific to the perinatal period, unspecified                                                    |
| R57.2 | Septic shock                                                                                               |
| R65.0 | Systemic Inflammatory Response Syndrome of infectious origin without organ failure                         |
| R65.1 | Systemic Inflammatory Response Syndrome of infectious origin with organ failure                            |

#### Chronic infections

|       |                               |
|-------|-------------------------------|
| A06.1 | Chronic intestinal amoebiasis |
| A06.3 | Amoeboma of intestine         |

|       |                                                                             |
|-------|-----------------------------------------------------------------------------|
| A15*  | Respiratory tuberculosis, bacteriologically and histologically confirmed    |
| A16*  | Respiratory tuberculosis, not confirmed bacteriologically or histologically |
| A17   | Tuberculosis of nervous system                                              |
| A17.0 | Tuberculous meningitis                                                      |
| A17.1 | Meningeal tuberculoma                                                       |
| A17.8 | Other tuberculosis of nervous system                                        |
| A17.9 | Tuberculosis of nervous system, unspecified                                 |
| A18*  | Tuberculosis of other organs                                                |
| A19*  | Miliary tuberculosis                                                        |
| A24.2 | Subacute and chronic melioidosis                                            |
| A30*  | Leprosy [Hansen disease]                                                    |
| A31*  | Infection due to other mycobacteria                                         |
| A39.3 | Chronic meningococcaemia                                                    |
| A42   | Actinomycosis                                                               |
| A42.0 | Pulmonary actinomycosis                                                     |
| A42.1 | Abdominal actinomycosis                                                     |
| A42.2 | Cervicofacial actinomycosis                                                 |
| A42.7 | Actinomycotic sepsis                                                        |
| A42.8 | Other forms of actinomycosis                                                |
| A42.9 | Actinomycosis, unspecified                                                  |
| A44.1 | Cutaneous and mucocutaneous bartonellosis                                   |
| A50   | Congenital syphilis                                                         |
| A50.0 | Early congenital syphilis, symptomatic                                      |
| A50.1 | Early congenital syphilis, latent                                           |
| A50.2 | Early congenital syphilis, unspecified                                      |
| A50.3 | Late congenital syphilitic ophthalmopathy                                   |
| A50.4 | Late congenital neurosyphilis [juvenile neurosyphilis]                      |
| A50.5 | Other late congenital syphilis, symptomatic                                 |
| A50.6 | Late congenital syphilis, latent                                            |
| A50.7 | Late congenital syphilis, unspecified                                       |
| A50.9 | Congenital syphilis, unspecified                                            |
| A51   | Early syphilis                                                              |
| A51.0 | Primary genital syphilis                                                    |
| A51.1 | Primary anal syphilis                                                       |
| A51.2 | Primary syphilis of other sites                                             |
| A51.3 | Secondary syphilis of skin and mucous membranes                             |
| A51.4 | Other secondary syphilis                                                    |
| A51.5 | Early syphilis, latent                                                      |
| A51.9 | Early syphilis, unspecified                                                 |
| A52   | Late syphilis                                                               |
| A52.0 | Cardiovascular syphilis                                                     |
| A52.1 | Symptomatic neurosyphilis                                                   |
| A52.2 | Asymptomatic neurosyphilis                                                  |
| A52.3 | Neurosyphilis, unspecified                                                  |
| A52.7 | Other symptomatic late syphilis                                             |
| A52.8 | Late syphilis, latent                                                       |
| A52.9 | Late syphilis, unspecified                                                  |
| A53*  | Other and unspecified syphilis                                              |

|       |                                                                                           |
|-------|-------------------------------------------------------------------------------------------|
| A58*  | Granuloma inguinale                                                                       |
| A60*  | Anogenital herpesviral [herpes simplex] infection                                         |
| A63.0 | Anogenital (venereal) warts                                                               |
| A65*  | Nonvenereal syphilis                                                                      |
| A66*  | Yaws                                                                                      |
| A67*  | Pinta [carate]                                                                            |
| A75.1 | Recrudescence typhus [Brill disease]                                                      |
| A81.1 | Subacute sclerosing panencephalitis                                                       |
| A81.2 | Progressive multifocal leukoencephalopathy                                                |
| B00   | Herpesviral [herpes simplex] infections                                                   |
| B00.0 | Eczema herpeticum                                                                         |
| B00.1 | Herpesviral vesicular dermatitis                                                          |
| B00.2 | Herpesviral gingivostomatitis and pharyngotonsillitis                                     |
| B00.3 | Herpesviral meningitis                                                                    |
| B00.4 | Herpesviral encephalitis                                                                  |
| B00.5 | Herpesviral ocular disease                                                                |
| B00.7 | Disseminated herpesviral disease                                                          |
| B00.8 | Other forms of herpesviral infection                                                      |
| B00.9 | Herpesviral infection, unspecified                                                        |
| B01   | Varicella [chickenpox]                                                                    |
| B01.0 | Varicella meningitis                                                                      |
| B01.1 | Varicella encephalitis                                                                    |
| B01.2 | Varicella pneumonia                                                                       |
| B01.8 | Varicella with other complications                                                        |
| B01.9 | Varicella without complication                                                            |
| B02   | Zoster [herpes zoster]                                                                    |
| B02.0 | Zoster encephalitis                                                                       |
| B02.1 | Zoster meningitis                                                                         |
| B02.2 | Zoster with other nervous system involvement                                              |
| B02.3 | Zoster ocular disease                                                                     |
| B02.7 | Disseminated zoster                                                                       |
| B02.8 | Zoster with other complications                                                           |
| B02.9 | Zoster without complication                                                               |
| B08.2 | Exanthema subitum [sixth disease]                                                         |
| B18*  | Chronic viral hepatitis                                                                   |
| B20*  | Human immunodeficiency virus [HIV] disease resulting in infectious and parasitic diseases |
| B21*  | Human immunodeficiency virus [HIV] disease resulting in malignant neoplasms               |
| B21.0 | HIV disease resulting in Kaposi sarcoma                                                   |
| B22   | Human immunodeficiency virus [HIV] disease resulting in other specified diseases          |
| B22.0 | HIV disease resulting in encephalopathy                                                   |
| B22.1 | HIV disease resulting in lymphoid interstitial pneumonitis                                |
| B22.2 | HIV disease resulting in wasting syndrome                                                 |
| B22.7 | HIV disease resulting in multiple diseases classified elsewhere                           |
| B23*  | Human immunodeficiency virus [HIV] disease resulting in other conditions                  |
| B24*  | Unspecified human immunodeficiency virus [HIV] disease                                    |
| B25*  | Cytomegaloviral disease                                                                   |
| B27   | Infectious mononucleosis                                                                  |
| B27.0 | Gammaherpesviral mononucleosis                                                            |

|       |                                                 |
|-------|-------------------------------------------------|
| B27.1 | Cytomegaloviral mononucleosis                   |
| B27.9 | Infectious mononucleosis, unspecified           |
| B33.3 | Retrovirus infections, not elsewhere classified |
| B34.4 | Papovavirus infection, unspecified site         |
| B35*  | Dermatophytosis                                 |
| B36*  | Other superficial mycoses                       |
| B37   | Candidiasis                                     |
| B37.0 | Candidal stomatitis                             |
| B37.1 | Pulmonary candidiasis                           |
| B37.2 | Candidiasis of skin and nail                    |
| B37.3 | Candidiasis of vulva and vagina                 |
| B37.4 | Candidiasis of other urogenital sites           |
| B37.5 | Candidal meningitis                             |
| B37.6 | Candidal endocarditis                           |
| B37.7 | Candidal sepsis                                 |
| B37.8 | Candidiasis of other sites                      |
| B37.9 | Candidiasis, unspecified                        |
| B38.1 | Chronic pulmonary coccidioidomycosis            |
| B38.3 | Cutaneous coccidioidomycosis                    |
| B38.4 | Coccidioidomycosis meningitis                   |
| B38.7 | Disseminated coccidioidomycosis                 |
| B38.8 | Other forms of coccidioidomycosis               |
| B39.1 | Chronic pulmonary histoplasmosis capsulati      |
| B39.3 | Disseminated histoplasmosis capsulati           |
| B39.5 | Histoplasmosis duboisii                         |
| B40.1 | Chronic pulmonary blastomycosis                 |
| B40.3 | Cutaneous blastomycosis                         |
| B40.7 | Disseminated blastomycosis                      |
| B40.8 | Other forms of blastomycosis                    |
| B41   | Paracoccidioidomycosis                          |
| B41.0 | Pulmonary paracoccidioidomycosis                |
| B41.7 | Disseminated paracoccidioidomycosis             |
| B41.8 | Other forms of paracoccidioidomycosis           |
| B41.9 | Paracoccidioidomycosis, unspecified             |
| B42   | Sporotrichosis                                  |
| B42.0 | Pulmonary sporotrichosis                        |
| B42.1 | Lymphocutaneous sporotrichosis                  |
| B42.7 | Disseminated sporotrichosis                     |
| B42.8 | Other forms of sporotrichosis                   |
| B42.9 | Sporotrichosis, unspecified                     |
| B43   | Chromomycosis and phaeomycotic abscess          |
| B43.0 | Cutaneous chromomycosis                         |
| B43.1 | Phaeomycotic brain abscess                      |
| B43.2 | Subcutaneous phaeomycotic abscess and cyst      |
| B43.8 | Other forms of chromomycosis                    |
| B43.9 | Chromomycosis, unspecified                      |
| B44*  | Aspergillosis                                   |
| B45.1 | Cerebral cryptococcosis                         |

|       |                                                                          |
|-------|--------------------------------------------------------------------------|
| B45.2 | Cutaneous cryptococcosis                                                 |
| B45.3 | Osseous cryptococcosis                                                   |
| B45.7 | Disseminated cryptococcosis                                              |
| B45.8 | Other forms of cryptococcosis                                            |
| B47   | Mycetoma                                                                 |
| B47.0 | Eumycetoma                                                               |
| B47.1 | Actinomycetoma                                                           |
| B47.9 | Mycetoma, unspecified                                                    |
| B48.0 | Lobomycosis                                                              |
| B48.1 | Rhinosporidiosis                                                         |
| B48.2 | Allescheriasis                                                           |
| B48.3 | Geotrichosis                                                             |
| B48.4 | Penicillosis                                                             |
| B48.7 | Opportunistic mycoses                                                    |
| B51*  | Plasmodium vivax malaria                                                 |
| B53.0 | Plasmodium ovale malaria                                                 |
| B55.0 | Visceral leishmaniasis                                                   |
| B55.2 | Mucocutaneous leishmaniasis                                              |
| B56*  | African trypanosomiasis                                                  |
| B57*  | Chagas disease                                                           |
| B58   | Toxoplasmosis                                                            |
| B58.0 | Toxoplasma oculopathy                                                    |
| B58.1 | Toxoplasma hepatitis                                                     |
| B58.2 | Toxoplasma meningoencephalitis                                           |
| B58.3 | Pulmonary toxoplasmosis                                                  |
| B58.8 | Toxoplasmosis with other organ involvement                               |
| B58.9 | Toxoplasmosis, unspecified                                               |
| B65   | Schistosomiasis [bilharziasis]                                           |
| B65.0 | Schistosomiasis due to Schistosoma haematobium [urinary schistosomiasis] |
| B65.1 | Schistosomiasis due to Schistosoma mansoni [intestinal schistosomiasis]  |
| B65.2 | Schistosomiasis due to Schistosoma japonicum                             |
| B65.3 | Cercarial dermatitis                                                     |
| B65.8 | Other schistosomiasis                                                    |
| B65.9 | Schistosomiasis, unspecified                                             |
| B66.0 | Opisthorchiasis                                                          |
| B66.1 | Clonorchiasis                                                            |
| B66.2 | Dicrocoeliasis                                                           |
| B66.3 | Fascioliasis                                                             |
| B66.4 | Paragonimiasis                                                           |
| B67*  | Echinococcosis                                                           |
| B68   | Taeniasis                                                                |
| B68.0 | Taenia solium taeniasis                                                  |
| B68.1 | Taenia saginata taeniasis                                                |
| B68.9 | Taeniasis, unspecified                                                   |
| B69   | Cysticercosis                                                            |
| B69.0 | Cysticercosis of central nervous system                                  |
| B69.1 | Cysticercosis of eye                                                     |
| B69.8 | Cysticercosis of other sites                                             |

|       |                                                                                      |
|-------|--------------------------------------------------------------------------------------|
| B69.9 | Cysticercosis, unspecified                                                           |
| B70   | Diphyllobothriasis and sparganosis                                                   |
| B70.0 | Diphyllobothriasis                                                                   |
| B70.1 | Sparganosis                                                                          |
| B71   | Other cestode infections                                                             |
| B71.0 | Hymenolepiasis                                                                       |
| B71.1 | Dipylidiasis                                                                         |
| B71.9 | Cestode infection, unspecified                                                       |
| B72*  | Dracunculiasis                                                                       |
| B73*  | Onchocerciasis                                                                       |
| B74*  | Filariasis                                                                           |
| B75*  | Trichinellosis                                                                       |
| B76*  | Hookworm diseases                                                                    |
| B77*  | Ascariasis                                                                           |
| B78*  | Strongyloidiasis                                                                     |
| B79*  | Trichuriasis                                                                         |
| B80*  | Enterobiasis                                                                         |
| B81.1 | Intestinal capillariasis                                                             |
| B81.2 | Trichostrongyliasis                                                                  |
| B83.1 | Gnathostomiasis                                                                      |
| B83.3 | Syngamiasis                                                                          |
| B85*  | Pediculosis and phthiriasis                                                          |
| B86*  | Scabies                                                                              |
| B97.3 | Retrovirus as the cause of diseases classified to other chapters                     |
| B97.7 | Papillomavirus as the cause of diseases classified to other chapters                 |
| B98.0 | Helicobacter pylori [H.pylori] as the cause of diseases classified to other chapters |
| C46   | Kaposi sarcoma                                                                       |
| G02.1 | Meningitis in mycoses                                                                |
| G04.1 | Tropical spastic paraplegia                                                          |
| H13.0 | Filarial infection of conjunctiva                                                    |
| H19.1 | Herpesviral keratitis and keratoconjunctivitis                                       |
| H62.2 | Otitis externa in mycoses                                                            |
| J17.3 | Pneumonia in parasitic diseases                                                      |
| K02*  | Dental caries                                                                        |
| K04.5 | Chronic apical periodontitis                                                         |
| K04.6 | Periapical abscess with sinus                                                        |
| K05.3 | Chronic periodontitis                                                                |
| K05.4 | Periodontosis                                                                        |
| K23.0 | Tuberculous oesophagitis                                                             |
| K23.1 | Megaoesophagus in Chagas disease                                                     |
| K67.2 | Syphilitic peritonitis                                                               |
| K67.3 | Tuberculous peritonitis                                                              |
| L70.1 | Acne conglobata                                                                      |
| M01.1 | Tuberculous arthritis                                                                |
| M49.0 | Tuberculosis of spine                                                                |
| M63.1 | Myositis in protozoal and parasitic infections classified elsewhere                  |
| M73.1 | Syphilitic bursitis                                                                  |
| M86.2 | Subacute osteomyelitis                                                               |

|       |                                                                                                  |
|-------|--------------------------------------------------------------------------------------------------|
| M86.3 | Chronic multifocal osteomyelitis                                                                 |
| M86.4 | Chronic osteomyelitis with draining sinus                                                        |
| M86.5 | Other chronic haematogenous osteomyelitis                                                        |
| M86.6 | Other chronic osteomyelitis                                                                      |
| M86.8 | Other osteomyelitis                                                                              |
| N29.0 | Late syphilis of kidney                                                                          |
| N74.0 | Tuberculous infection of cervix uteri                                                            |
| N74.1 | Female tuberculous pelvic inflammatory disease                                                   |
| N74.2 | Female syphilitic pelvic inflammatory disease                                                    |
| O98.0 | Tuberculosis complicating pregnancy, childbirth and the puerperium                               |
| O98.1 | Syphilis complicating pregnancy, childbirth and the puerperium                                   |
| O98.7 | Human immunodeficiency virus [HIV] disease complicating pregnancy, childbirth and the puerperium |
| P35.1 | Congenital cytomegalovirus infection                                                             |
| P35.2 | Congenital herpesviral [herpes simplex] infection                                                |
| P35.3 | Congenital viral hepatitis                                                                       |
| P37.0 | Congenital tuberculosis                                                                          |
| P37.1 | Congenital toxoplasmosis                                                                         |
| P37.5 | Neonatal candidiasis                                                                             |
| Z21   | Asymptomatic human immunodeficiency virus [HIV] infection status                                 |

#### Infections predisposed towards entering the central nervous system

|       |                                                                             |
|-------|-----------------------------------------------------------------------------|
| A02.2 | Localized salmonella infections                                             |
| A06   | Amoebiasis                                                                  |
| A06.0 | Acute amoebic dysentery                                                     |
| A06.1 | Chronic intestinal amoebiasis                                               |
| A06.2 | Amoebic nondysenteric colitis                                               |
| A06.3 | Amoeboma of intestine                                                       |
| A06.4 | Amoebic liver abscess                                                       |
| A06.5 | Amoebic lung abscess                                                        |
| A06.6 | Amoebic brain abscess                                                       |
| A06.7 | Cutaneous amoebiasis                                                        |
| A06.8 | Amoebic infection of other sites                                            |
| A06.9 | Amoebiasis, unspecified                                                     |
| A08.2 | Adenoviral enteritis                                                        |
| A15*  | Respiratory tuberculosis, bacteriologically and histologically confirmed    |
| A16*  | Respiratory tuberculosis, not confirmed bacteriologically or histologically |
| A17   | Tuberculosis of nervous system                                              |
| A17.0 | Tuberculous meningitis                                                      |
| A17.1 | Meningeal tuberculoma                                                       |
| A17.8 | Other tuberculosis of nervous system                                        |
| A17.9 | Tuberculosis of nervous system, unspecified                                 |
| A18*  | Tuberculosis of other organs                                                |
| A19*  | Miliary tuberculosis                                                        |
| A20   | Plague                                                                      |
| A20.0 | Bubonic plague                                                              |

|       |                                               |
|-------|-----------------------------------------------|
| A20.1 | Cellulocutaneous plague                       |
| A20.2 | Pneumonic plague                              |
| A20.3 | Plague meningitis                             |
| A20.7 | Septicaemic plague                            |
| A20.8 | Other forms of plague                         |
| A20.9 | Plague, unspecified                           |
| A22   | Anthrax                                       |
| A22.0 | Cutaneous anthrax                             |
| A22.1 | Pulmonary anthrax                             |
| A22.2 | Gastrointestinal anthrax                      |
| A22.7 | Anthrax sepsis                                |
| A22.8 | Other forms of anthrax                        |
| A22.9 | Anthrax, unspecified                          |
| A23   | Brucellosis                                   |
| A23.0 | Brucellosis due to <i>Brucella melitensis</i> |
| A23.1 | Brucellosis due to <i>Brucella abortus</i>    |
| A23.2 | Brucellosis due to <i>Brucella suis</i>       |
| A23.3 | Brucellosis due to <i>Brucella canis</i>      |
| A23.8 | Other brucellosis                             |
| A23.9 | Brucellosis, unspecified                      |
| A24   | Glanders and melioidosis                      |
| A24.1 | Acute and fulminating melioidosis             |
| A24.2 | Subacute and chronic melioidosis              |
| A24.3 | Other melioidosis                             |
| A25   | Rat-bite fevers                               |
| A25.1 | Streptobacillosis                             |
| A25.9 | Rat-bite fever, unspecified                   |
| A27*  | Leptospirosis                                 |
| A28.0 | Pasteurellosis                                |
| A28.1 | Cat-scratch disease                           |
| A32   | Listeriosis                                   |
| A32.0 | Cutaneous listeriosis                         |
| A32.1 | Listerial meningitis and meningoen­cephalitis |
| A32.7 | Listerial sepsis                              |
| A32.8 | Other forms of listeriosis                    |
| A32.9 | Listeriosis, unspecified                      |
| A39   | Meningococcal infection                       |
| A39.0 | Meningococcal meningitis                      |
| A39.1 | Waterhouse-Friderichsen syndrome              |
| A39.2 | Acute meningococcaemia                        |
| A39.3 | Chronic meningococcaemia                      |
| A39.4 | Meningococcaemia, unspecified                 |
| A39.5 | Meningococcal heart disease                   |
| A39.8 | Other meningococcal infections                |
| A39.9 | Meningococcal infection, unspecified          |
| A40.3 | Sepsis due to <i>Streptococcus pneumoniae</i> |
| A41.3 | Sepsis due to <i>Haemophilus influenzae</i>   |
| A42   | Actinomycosis                                 |



|       |                                                        |
|-------|--------------------------------------------------------|
| A42.0 | Pulmonary actinomycosis                                |
| A42.1 | Abdominal actinomycosis                                |
| A42.2 | Cervicofacial actinomycosis                            |
| A42.7 | Actinomycotic sepsis                                   |
| A42.8 | Other forms of actinomycosis                           |
| A42.9 | Actinomycosis, unspecified                             |
| A43   | Nocardiosis                                            |
| A43.0 | Pulmonary nocardiosis                                  |
| A43.1 | Cutaneous nocardiosis                                  |
| A43.8 | Other forms of nocardiosis                             |
| A44   | Bartonellosis                                          |
| A44.0 | Systemic bartonellosis                                 |
| A44.1 | Cutaneous and mucocutaneous bartonellosis              |
| A44.8 | Other forms of bartonellosis                           |
| A44.9 | Bartonellosis, unspecified                             |
| A49.2 | Haemophilus influenzae infection, unspecified site     |
| A50   | Congenital syphilis                                    |
| A50.0 | Early congenital syphilis, symptomatic                 |
| A50.1 | Early congenital syphilis, latent                      |
| A50.2 | Early congenital syphilis, unspecified                 |
| A50.3 | Late congenital syphilitic ophthalmopathy              |
| A50.4 | Late congenital neurosyphilis [juvenile neurosyphilis] |
| A50.5 | Other late congenital syphilis, symptomatic            |
| A50.6 | Late congenital syphilis, latent                       |
| A50.7 | Late congenital syphilis, unspecified                  |
| A50.9 | Congenital syphilis, unspecified                       |
| A51   | Early syphilis                                         |
| A51.0 | Primary genital syphilis                               |
| A51.1 | Primary anal syphilis                                  |
| A51.2 | Primary syphilis of other sites                        |
| A51.3 | Secondary syphilis of skin and mucous membranes        |
| A51.4 | Other secondary syphilis                               |
| A51.5 | Early syphilis, latent                                 |
| A51.9 | Early syphilis, unspecified                            |
| A52   | Late syphilis                                          |
| A52.0 | Cardiovascular syphilis                                |
| A52.1 | Symptomatic neurosyphilis                              |
| A52.2 | Asymptomatic neurosyphilis                             |
| A52.3 | Neurosyphilis, unspecified                             |
| A52.7 | Other symptomatic late syphilis                        |
| A52.8 | Late syphilis, latent                                  |
| A52.9 | Late syphilis, unspecified                             |
| A53*  | Other and unspecified syphilis                         |
| A60*  | Anogenital herpesviral [herpes simplex] infection      |
| A68*  | Relapsing fevers                                       |
| A69   | Other spirochaetal infections                          |
| A69.2 | Lyme disease                                           |
| A69.8 | Other specified spirochaetal infections                |

|       |                                                                            |
|-------|----------------------------------------------------------------------------|
| A69.9 | Spirochaetal infection, unspecified                                        |
| A70*  | Chlamydia psittaci infection                                               |
| A75   | Typhus fever                                                               |
| A75.0 | Epidemic louse-borne typhus fever due to Rickettsia prowazekii             |
| A75.1 | Recrudescence typhus [Brill disease]                                       |
| A75.2 | Typhus fever due to Rickettsia typhi                                       |
| A75.3 | Typhus fever due to Rickettsia tsutsugamushi                               |
| A75.9 | Typhus fever, unspecified                                                  |
| A77   | Spotted fever [tick-borne rickettsioses]                                   |
| A77.0 | Spotted fever due to Rickettsia rickettsii                                 |
| A77.1 | Spotted fever due to Rickettsia conorii                                    |
| A77.2 | Spotted fever due to Rickettsia sibirica                                   |
| A77.3 | Spotted fever due to Rickettsia australis                                  |
| A77.8 | Other spotted fevers                                                       |
| A77.9 | Spotted fever, unspecified                                                 |
| A78*  | Q fever                                                                    |
| A79   | Other rickettsioses                                                        |
| A79.1 | Rickettsialpox due to Rickettsia akari                                     |
| A79.8 | Other specified rickettsioses                                              |
| A79.9 | Rickettsiosis, unspecified                                                 |
| A80*  | Acute poliomyelitis                                                        |
| A81.1 | Subacute sclerosing panencephalitis                                        |
| A81.2 | Progressive multifocal leukoencephalopathy                                 |
| A83*  | Mosquito-borne viral encephalitis                                          |
| A84*  | Tick-borne viral encephalitis                                              |
| A85*  | Other viral encephalitis, not elsewhere classified                         |
| A86*  | Unspecified viral encephalitis                                             |
| A87*  | Viral meningitis                                                           |
| A88*  | Other viral infections of central nervous system, not elsewhere classified |
| A89*  | Unspecified viral infection of central nervous system                      |
| A90*  | Dengue fever [classical dengue]                                            |
| A91*  | Dengue haemorrhagic fever                                                  |
| A92.0 | Chikungunya virus disease                                                  |
| A92.2 | Venezuelan equine fever                                                    |
| A92.3 | West Nile virus infection                                                  |
| A92.4 | Rift Valley fever                                                          |
| A93.1 | Sandfly fever                                                              |
| A93.2 | Colorado tick fever                                                        |
| A94*  | Unspecified arthropod-borne viral fever                                    |
| A96*  | Arenaviral haemorrhagic fever                                              |
| A97*  | Dengue                                                                     |
| A98.1 | Omsk haemorrhagic fever                                                    |
| A98.2 | Kyasanur Forest disease                                                    |
| A98.3 | Marburg virus disease                                                      |
| A98.4 | Ebola virus disease                                                        |
| B00   | Herpesviral [herpes simplex] infections                                    |
| B00.0 | Eczema herpeticum                                                          |
| B00.1 | Herpesviral vesicular dermatitis                                           |

|       |                                                                       |
|-------|-----------------------------------------------------------------------|
| B00.2 | Herpesviral gingivostomatitis and pharyngotonsillitis                 |
| B00.3 | Herpesviral meningitis                                                |
| B00.4 | Herpesviral encephalitis                                              |
| B00.5 | Herpesviral ocular disease                                            |
| B00.7 | Disseminated herpesviral disease                                      |
| B00.8 | Other forms of herpesviral infection                                  |
| B00.9 | Herpesviral infection, unspecified                                    |
| B01   | Varicella [chickenpox]                                                |
| B01.0 | Varicella meningitis                                                  |
| B01.1 | Varicella encephalitis                                                |
| B01.2 | Varicella pneumonia                                                   |
| B01.8 | Varicella with other complications                                    |
| B01.9 | Varicella without complication                                        |
| B02   | Zoster [herpes zoster]                                                |
| B02.0 | Zoster encephalitis                                                   |
| B02.1 | Zoster meningitis                                                     |
| B02.2 | Zoster with other nervous system involvement                          |
| B02.3 | Zoster ocular disease                                                 |
| B02.7 | Disseminated zoster                                                   |
| B02.8 | Zoster with other complications                                       |
| B02.9 | Zoster without complication                                           |
| B04*  | Monkeypox                                                             |
| B05   | Measles                                                               |
| B05.0 | Measles complicated by encephalitis                                   |
| B05.1 | Measles complicated by meningitis                                     |
| B05.2 | Measles complicated by pneumonia                                      |
| B05.3 | Measles complicated by otitis media                                   |
| B05.4 | Measles with intestinal complications                                 |
| B05.8 | Measles with other complications                                      |
| B05.9 | Measles without complication                                          |
| B06   | Rubella [German measles]                                              |
| B06.0 | Rubella with neurological complications                               |
| B06.8 | Rubella with other complications                                      |
| B06.9 | Rubella without complication                                          |
| B08.2 | Exanthema subitum [sixth disease]                                     |
| B08.4 | Enteroviral vesicular stomatitis with exanthem                        |
| B08.5 | Enteroviral vesicular pharyngitis                                     |
| B15   | Acute hepatitis A                                                     |
| B15.0 | Hepatitis A with hepatic coma                                         |
| B15.9 | Hepatitis A without hepatic coma                                      |
| B16   | Acute hepatitis B                                                     |
| B16.0 | Acute hepatitis B with delta-agent (coinfection) with hepatic coma    |
| B16.1 | Acute hepatitis B with delta-agent (coinfection) without hepatic coma |
| B16.2 | Acute hepatitis B without delta-agent with hepatic coma               |
| B16.9 | Acute hepatitis B without delta-agent and without hepatic coma        |
| B17*  | Other acute viral hepatitis                                           |
| B18*  | Chronic viral hepatitis                                               |
| B19   | Unspecified viral hepatitis                                           |

|       |                                                                                           |
|-------|-------------------------------------------------------------------------------------------|
| B19.0 | Unspecified viral hepatitis with hepatic coma                                             |
| B19.9 | Unspecified viral hepatitis without hepatic coma                                          |
| B20*  | Human immunodeficiency virus [HIV] disease resulting in infectious and parasitic diseases |
| B21*  | Human immunodeficiency virus [HIV] disease resulting in malignant neoplasms               |
| B21.0 | HIV disease resulting in Kaposi sarcoma                                                   |
| B22   | Human immunodeficiency virus [HIV] disease resulting in other specified diseases          |
| B22.0 | HIV disease resulting in encephalopathy                                                   |
| B22.1 | HIV disease resulting in lymphoid interstitial pneumonitis                                |
| B22.2 | HIV disease resulting in wasting syndrome                                                 |
| B22.7 | HIV disease resulting in multiple diseases classified elsewhere                           |
| B23*  | Human immunodeficiency virus [HIV] disease resulting in other conditions                  |
| B24*  | Unspecified human immunodeficiency virus [HIV] disease                                    |
| B25*  | Cytomegaloviral disease                                                                   |
| B26   | Mumps                                                                                     |
| B26.0 | Mumps orchitis                                                                            |
| B26.1 | Mumps meningitis                                                                          |
| B26.2 | Mumps encephalitis                                                                        |
| B26.3 | Mumps pancreatitis                                                                        |
| B26.8 | Mumps with other complications                                                            |
| B26.9 | Mumps without complication                                                                |
| B27   | Infectious mononucleosis                                                                  |
| B27.0 | Gammaherpesviral mononucleosis                                                            |
| B27.1 | Cytomegaloviral mononucleosis                                                             |
| B27.9 | Infectious mononucleosis, unspecified                                                     |
| B33.3 | Retrovirus infections, not elsewhere classified                                           |
| B34.0 | Adenovirus infection, unspecified site                                                    |
| B34.1 | Enterovirus infection, unspecified site                                                   |
| B37   | Candidiasis                                                                               |
| B37.0 | Candidal stomatitis                                                                       |
| B37.1 | Pulmonary candidiasis                                                                     |
| B37.2 | Candidiasis of skin and nail                                                              |
| B37.3 | Candidiasis of vulva and vagina                                                           |
| B37.4 | Candidiasis of other urogenital sites                                                     |
| B37.5 | Candidal meningitis                                                                       |
| B37.6 | Candidal endocarditis                                                                     |
| B37.7 | Candidal sepsis                                                                           |
| B37.8 | Candidiasis of other sites                                                                |
| B37.9 | Candidiasis, unspecified                                                                  |
| B38   | Coccidioidomycosis                                                                        |
| B38.0 | Acute pulmonary coccidioidomycosis                                                        |
| B38.1 | Chronic pulmonary coccidioidomycosis                                                      |
| B38.2 | Pulmonary coccidioidomycosis, unspecified                                                 |
| B38.3 | Cutaneous coccidioidomycosis                                                              |
| B38.4 | Coccidioidomycosis meningitis                                                             |
| B38.7 | Disseminated coccidioidomycosis                                                           |
| B38.8 | Other forms of coccidioidomycosis                                                         |
| B38.9 | Coccidioidomycosis, unspecified                                                           |
| B39   | Histoplasmosis                                                                            |

|       |                                                 |
|-------|-------------------------------------------------|
| B39.0 | Acute pulmonary histoplasmosis capsulati        |
| B39.1 | Chronic pulmonary histoplasmosis capsulati      |
| B39.2 | Pulmonary histoplasmosis capsulati, unspecified |
| B39.3 | Disseminated histoplasmosis capsulati           |
| B39.4 | Histoplasmosis capsulati, unspecified           |
| B39.5 | Histoplasmosis duboisii                         |
| B39.9 | Histoplasmosis, unspecified                     |
| B40   | Blastomycosis                                   |
| B40.0 | Acute pulmonary blastomycosis                   |
| B40.1 | Chronic pulmonary blastomycosis                 |
| B40.2 | Pulmonary blastomycosis, unspecified            |
| B40.3 | Cutaneous blastomycosis                         |
| B40.7 | Disseminated blastomycosis                      |
| B40.8 | Other forms of blastomycosis                    |
| B40.9 | Blastomycosis, unspecified                      |
| B42   | Sporotrichosis                                  |
| B42.0 | Pulmonary sporotrichosis                        |
| B42.1 | Lymphocutaneous sporotrichosis                  |
| B42.7 | Disseminated sporotrichosis                     |
| B42.8 | Other forms of sporotrichosis                   |
| B42.9 | Sporotrichosis, unspecified                     |
| B43   | Chromomycosis and phaeomycotic abscess          |
| B43.0 | Cutaneous chromomycosis                         |
| B43.1 | Phaeomycotic brain abscess                      |
| B43.2 | Subcutaneous phaeomycotic abscess and cyst      |
| B43.8 | Other forms of chromomycosis                    |
| B43.9 | Chromomycosis, unspecified                      |
| B45   | Cryptococcosis                                  |
| B45.0 | Pulmonary cryptococcosis                        |
| B45.1 | Cerebral cryptococcosis                         |
| B45.2 | Cutaneous cryptococcosis                        |
| B45.3 | Osseous cryptococcosis                          |
| B45.7 | Disseminated cryptococcosis                     |
| B45.8 | Other forms of cryptococcosis                   |
| B45.9 | Cryptococcosis, unspecified                     |
| B46   | Zygomycosis                                     |
| B46.0 | Pulmonary mucormycosis                          |
| B46.1 | Rhinocerebral mucormycosis                      |
| B46.2 | Gastrointestinal mucormycosis                   |
| B46.3 | Cutaneous mucormycosis                          |
| B46.4 | Disseminated mucormycosis                       |
| B46.5 | Mucormycosis, unspecified                       |
| B46.8 | Other zygomycoses                               |
| B46.9 | Zygomycosis, unspecified                        |
| B47.1 | Actinomycetoma                                  |
| B48.2 | Allescheriasis                                  |
| B49*  | Unspecified mycosis                             |
| B50*  | Plasmodium falciparum malaria                   |

|       |                                                                                              |
|-------|----------------------------------------------------------------------------------------------|
| B50.0 | Plasmodium falciparum malaria with cerebral complications                                    |
| B50.8 | Other severe and complicated Plasmodium falciparum malaria                                   |
| B50.9 | Plasmodium falciparum malaria, unspecified                                                   |
| B53.1 | Malaria due to simian plasmodia                                                              |
| B54*  | Unspecified malaria                                                                          |
| B56*  | African trypanosomiasis                                                                      |
| B57*  | Chagas disease                                                                               |
| B58   | Toxoplasmosis                                                                                |
| B58.0 | Toxoplasma oculopathy                                                                        |
| B58.1 | Toxoplasma hepatitis                                                                         |
| B58.2 | Toxoplasma meningoencephalitis                                                               |
| B58.3 | Pulmonary toxoplasmosis                                                                      |
| B58.8 | Toxoplasmosis with other organ involvement                                                   |
| B58.9 | Toxoplasmosis, unspecified                                                                   |
| B60.1 | Acanthamoebiasis                                                                             |
| B60.2 | Naegleriasis                                                                                 |
| B65   | Schistosomiasis [bilharziasis]                                                               |
| B65.2 | Schistosomiasis due to Schistosoma japonicum                                                 |
| B65.9 | Schistosomiasis, unspecified                                                                 |
| B66.4 | Paragonimiasis                                                                               |
| B67*  | Echinococcosis                                                                               |
| B68   | Taeniasis                                                                                    |
| B68.0 | Taenia solium taeniasis                                                                      |
| B68.9 | Taeniasis, unspecified                                                                       |
| B69   | Cysticercosis                                                                                |
| B69.0 | Cysticercosis of central nervous system                                                      |
| B69.1 | Cysticercosis of eye                                                                         |
| B69.8 | Cysticercosis of other sites                                                                 |
| B69.9 | Cysticercosis, unspecified                                                                   |
| B70   | Diphyllobothriasis and sparganosis                                                           |
| B70.0 | Diphyllobothriasis                                                                           |
| B70.1 | Sparganosis                                                                                  |
| B78*  | Strongyloidiasis                                                                             |
| B81.3 | Intestinal angiostrongyliasis                                                                |
| B81.4 | Mixed intestinal helminthiasis                                                               |
| B83.0 | Visceral larva migrans                                                                       |
| B83.1 | Gnathostomiasis                                                                              |
| B83.2 | Angiostrongyliasis due to Parastrongylus cantonensis                                         |
| B87*  | Myiasis                                                                                      |
| B96.3 | Haemophilus influenzae [H. influenzae] as the cause of diseases classified to other chapters |
| B97.0 | Adenovirus as the cause of diseases classified to other chapters                             |
| B97.1 | Enterovirus as the cause of diseases classified to other chapters                            |
| B97.3 | Retrovirus as the cause of diseases classified to other chapters                             |
| G00   | Bacterial meningitis, not elsewhere classified                                               |
| G00.0 | Haemophilus meningitis                                                                       |
| G00.1 | Pneumococcal meningitis                                                                      |
| G00.2 | Streptococcal meningitis                                                                     |
| G00.3 | Staphylococcal meningitis                                                                    |

|       |                                                                                                              |
|-------|--------------------------------------------------------------------------------------------------------------|
| G00.8 | Other bacterial meningitis                                                                                   |
| G00.9 | Bacterial meningitis, unspecified                                                                            |
| G01*  | Meningitis in bacterial diseases classified elsewhere                                                        |
| G02.0 | Meningitis in viral diseases classified elsewhere                                                            |
| G02.1 | Meningitis in mycoses                                                                                        |
| G02.8 | Meningitis in other specified infectious and parasitic diseases classified elsewhere                         |
| G03*  | Meningitis due to other and unspecified causes                                                               |
| G04.1 | Tropical spastic paraplegia                                                                                  |
| G04.2 | Bacterial meningoencephalitis and meningomyelitis, not elsewhere classified                                  |
| G05.0 | Encephalitis, myelitis and encephalomyelitis in bacterial diseases classified elsewhere                      |
| G05.1 | Encephalitis, myelitis and encephalomyelitis in viral diseases classified elsewhere                          |
| G05.2 | Encephalitis, myelitis and encephalomyelitis in other infectious and parasitic diseases classified elsewhere |
| G06*  | Intracranial and intraspinal abscess and granuloma                                                           |
| G07*  | Intracranial and intraspinal abscess and granuloma in diseases classified elsewhere                          |
| H05.0 | Acute inflammation of orbit                                                                                  |
| H19.0 | Scleritis and episcleritis in diseases classified elsewhere                                                  |
| H19.1 | Herpesviral keratitis and keratoconjunctivitis                                                               |
| H19.2 | Keratitis and keratoconjunctivitis in other infectious and parasitic diseases classified elsewhere           |
| H22.0 | Iridocyclitis in infectious and parasitic diseases classified elsewhere                                      |
| H32.0 | Chorioretinal inflammation in infectious and parasitic diseases classified elsewhere                         |
| H60.2 | Malignant otitis externa                                                                                     |
| H62.1 | Otitis externa in viral diseases classified elsewhere                                                        |
| H62.2 | Otitis externa in mycoses                                                                                    |
| H70.0 | Acute mastoiditis                                                                                            |
| H75.0 | Mastoiditis in infectious and parasitic diseases classified elsewhere                                        |
| I33.0 | Acute and subacute infective endocarditis                                                                    |
| I68.1 | Cerebral arteritis in infectious and parasitic diseases classified elsewhere                                 |
| J13*  | Pneumonia due to <i>Streptococcus pneumoniae</i>                                                             |
| J14*  | Pneumonia due to <i>Haemophilus influenzae</i>                                                               |
| J17.2 | Pneumonia in mycoses                                                                                         |
| J20.1 | Acute bronchitis due to <i>Haemophilus influenzae</i>                                                        |
| K12.2 | Cellulitis and abscess of mouth                                                                              |
| K23.0 | Tuberculous oesophagitis                                                                                     |
| K67.2 | Syphilitic peritonitis                                                                                       |
| K67.3 | Tuberculous peritonitis                                                                                      |
| M00.1 | Pneumococcal arthritis and polyarthritis                                                                     |
| M01.0 | Meningococcal arthritis                                                                                      |
| M01.1 | Tuberculous arthritis                                                                                        |
| M01.2 | Arthritis in Lyme disease                                                                                    |
| M01.4 | Rubella arthritis                                                                                            |
| M01.5 | Arthritis in other viral diseases classified elsewhere                                                       |
| M49.0 | Tuberculosis of spine                                                                                        |
| M49.1 | <i>Brucella</i> spondylitis                                                                                  |
| M73.1 | Syphilitic bursitis                                                                                          |
| N29.0 | Late syphilis of kidney                                                                                      |
| N74.0 | Tuberculous infection of cervix uteri                                                                        |
| N74.1 | Female tuberculous pelvic inflammatory disease                                                               |
| N74.2 | Female syphilitic pelvic inflammatory disease                                                                |

|       |                                                                                                  |
|-------|--------------------------------------------------------------------------------------------------|
| O98.0 | Tuberculosis complicating pregnancy, childbirth and the puerperium                               |
| O98.1 | Syphilis complicating pregnancy, childbirth and the puerperium                                   |
| O98.4 | Viral hepatitis complicating pregnancy, childbirth and the puerperium                            |
| O98.7 | Human immunodeficiency virus [HIV] disease complicating pregnancy, childbirth and the puerperium |
| P23.3 | Congenital pneumonia due to streptococcus, group B                                               |
| P23.4 | Congenital pneumonia due to Escherichia coli                                                     |
| P35.0 | Congenital rubella syndrome                                                                      |
| P35.1 | Congenital cytomegalovirus infection                                                             |
| P35.2 | Congenital herpesviral [herpes simplex] infection                                                |
| P35.3 | Congenital viral hepatitis                                                                       |
| P36   | Bacterial sepsis of newborn                                                                      |
| P36.0 | Sepsis of newborn due to streptococcus, group B                                                  |
| P36.4 | Sepsis of newborn due to Escherichia coli                                                        |
| P37.0 | Congenital tuberculosis                                                                          |
| P37.1 | Congenital toxoplasmosis                                                                         |
| P37.2 | Neonatal (disseminated) listeriosis                                                              |
| P37.3 | Congenital falciparum malaria                                                                    |
| P37.5 | Neonatal candidiasis                                                                             |
| P39.2 | Intra-amniotic infection of fetus, not elsewhere classified                                      |
| Z21   | Asymptomatic human immunodeficiency virus [HIV] infection status                                 |

#### Infections not predisposed towards entering the central nervous system

|       |                                               |
|-------|-----------------------------------------------|
| A00*  | Cholera                                       |
| A01*  | Typhoid and paratyphoid fevers                |
| A02   | Other salmonella infections                   |
| A02.0 | Salmonella enteritis                          |
| A02.1 | Salmonella sepsis                             |
| A02.8 | Other specified salmonella infections         |
| A02.9 | Salmonella infection, unspecified             |
| A03   | Shigellosis                                   |
| A03.0 | Shigellosis due to Shigella dysenteriae       |
| A03.1 | Shigellosis due to Shigella flexneri          |
| A03.2 | Shigellosis due to Shigella boydii            |
| A03.3 | Shigellosis due to Shigella sonnei            |
| A03.8 | Other shigellosis                             |
| A03.9 | Shigellosis, unspecified                      |
| A04   | Other bacterial intestinal infections         |
| A04.0 | Enteropathogenic Escherichia coli infection   |
| A04.1 | Enterotoxigenic Escherichia coli infection    |
| A04.2 | Enteroinvasive Escherichia coli infection     |
| A04.3 | Enterohaemorrhagic Escherichia coli infection |
| A04.4 | Other intestinal Escherichia coli infections  |
| A04.5 | Campylobacter enteritis                       |
| A04.6 | Enteritis due to Yersinia enterocolitica      |
| A04.7 | Enterocolitis due to Clostridium difficile    |



|       |                                                                        |
|-------|------------------------------------------------------------------------|
| A04.8 | Other specified bacterial intestinal infections                        |
| A04.9 | Bacterial intestinal infection, unspecified                            |
| A05   | Other bacterial foodborne intoxications, not elsewhere classified      |
| A05.0 | Foodborne staphylococcal intoxication                                  |
| A05.1 | Botulism                                                               |
| A05.2 | Foodborne Clostridium perfringens [Clostridium welchii] intoxication   |
| A05.3 | Foodborne Vibrio parahaemolyticus intoxication                         |
| A05.4 | Foodborne Bacillus cereus intoxication                                 |
| A05.8 | Other specified bacterial foodborne intoxications                      |
| A05.9 | Bacterial foodborne intoxication, unspecified                          |
| A07*  | Other protozoal intestinal diseases                                    |
| A08.0 | Rotaviral enteritis                                                    |
| A08.1 | Acute gastroenteropathy due to Norwalk agent                           |
| A08.3 | Other viral enteritis                                                  |
| A08.4 | Viral intestinal infection, unspecified                                |
| A08.5 | Other specified intestinal infections                                  |
| A09*  | Other gastroenteritis and colitis of infectious and unspecified origin |
| A21   | Tularaemia                                                             |
| A21.0 | Ulceroglandular tularaemia                                             |
| A21.1 | Oculoglandular tularaemia                                              |
| A21.2 | Pulmonary tularaemia                                                   |
| A21.3 | Gastrointestinal tularaemia                                            |
| A21.7 | Generalized tularaemia                                                 |
| A21.8 | Other forms of tularaemia                                              |
| A21.9 | Tularaemia, unspecified                                                |
| A24.0 | Glanders                                                               |
| A25.0 | Spirillosis                                                            |
| A26   | Erysipeloid                                                            |
| A26.0 | Cutaneous erysipeloid                                                  |
| A26.7 | Erysipelothrix sepsis                                                  |
| A26.8 | Other forms of erysipeloid                                             |
| A26.9 | Erysipeloid, unspecified                                               |
| A28.2 | Extraintestinal yersiniosis                                            |
| A30*  | Leprosy [Hansen disease]                                               |
| A31*  | Infection due to other mycobacteria                                    |
| A33*  | Tetanus neonatorum                                                     |
| A34*  | Obstetrical tetanus                                                    |
| A35*  | Other tetanus                                                          |
| A36*  | Diphtheria                                                             |
| A37*  | Whooping cough                                                         |
| A38*  | Scarlet fever                                                          |
| A40   | Streptococcal sepsis                                                   |
| A40.0 | Sepsis due to streptococcus, group A                                   |
| A40.1 | Sepsis due to streptococcus, group B                                   |
| A40.2 | Sepsis due to streptococcus, group D                                   |
| A40.8 | Other streptococcal sepsis                                             |
| A40.9 | Streptococcal sepsis, unspecified                                      |
| A41   | Other sepsis                                                           |

|       |                                                                                                   |
|-------|---------------------------------------------------------------------------------------------------|
| A41.0 | Sepsis due to <i>Staphylococcus aureus</i>                                                        |
| A41.1 | Sepsis due to other specified staphylococcus                                                      |
| A41.2 | Sepsis due to unspecified staphylococcus                                                          |
| A41.4 | Sepsis due to anaerobes                                                                           |
| A41.5 | Sepsis due to other Gram-negative organisms                                                       |
| A41.8 | Other specified sepsis                                                                            |
| A41.9 | Sepsis, unspecified                                                                               |
| A46*  | Erysipelas                                                                                        |
| A48.0 | Gas gangrene                                                                                      |
| A48.1 | Legionnaires disease                                                                              |
| A48.2 | Nonpneumonic Legionnaires disease [Pontiac fever]                                                 |
| A48.3 | Toxic shock syndrome                                                                              |
| A48.4 | Brazilian purpuric fever                                                                          |
| A49   | Bacterial infection of unspecified site                                                           |
| A49.3 | <i>Mycoplasma</i> infection, unspecified site                                                     |
| A54   | Gonococcal infection                                                                              |
| A54.0 | Gonococcal infection of lower genitourinary tract without periurethral or accessory gland abscess |
| A54.1 | Gonococcal infection of lower genitourinary tract with periurethral and accessory gland abscess   |
| A54.2 | Gonococcal pelviperitonitis and other gonococcal genitourinary infections                         |
| A54.3 | Gonococcal infection of eye                                                                       |
| A54.4 | Gonococcal infection of musculoskeletal system                                                    |
| A54.5 | Gonococcal pharyngitis                                                                            |
| A54.6 | Gonococcal infection of anus and rectum                                                           |
| A54.8 | Other gonococcal infections                                                                       |
| A54.9 | Gonococcal infection, unspecified                                                                 |
| A55*  | Chlamydial lymphogranuloma (venereum)                                                             |
| A56.0 | Chlamydial infection of lower genitourinary tract                                                 |
| A56.1 | Chlamydial infection of pelviperitoneum and other genitourinary organs                            |
| A56.2 | Chlamydial infection of genitourinary tract, unspecified                                          |
| A56.3 | Chlamydial infection of anus and rectum                                                           |
| A56.4 | Chlamydial infection of pharynx                                                                   |
| A56.8 | Sexually transmitted chlamydial infection of other sites                                          |
| A57*  | Chancroid                                                                                         |
| A58*  | Granuloma inguinale                                                                               |
| A59*  | Trichomoniasis                                                                                    |
| A63.0 | Anogenital (venereal) warts                                                                       |
| A63.8 | Other specified predominantly sexually transmitted diseases                                       |
| A64*  | Unspecified sexually transmitted disease                                                          |
| A65*  | Nonvenereal syphilis                                                                              |
| A66*  | Yaws                                                                                              |
| A67*  | Pinta [carate]                                                                                    |
| A69.0 | Necrotizing ulcerative stomatitis                                                                 |
| A69.1 | Other Vincent infections                                                                          |
| A71*  | Trachoma                                                                                          |
| A74.0 | Chlamydial conjunctivitis                                                                         |
| A74.8 | Other chlamydial diseases                                                                         |
| A74.9 | Chlamydial infection, unspecified                                                                 |
| A79.0 | Trench fever                                                                                      |

|       |                                                                                    |
|-------|------------------------------------------------------------------------------------|
| A92.1 | O'nyong-nyong fever                                                                |
| A93.0 | Oropouche virus disease                                                            |
| A93.8 | Other specified arthropod-borne viral fevers                                       |
| A95*  | Yellow fever                                                                       |
| A98.0 | Crimean-Congo haemorrhagic fever                                                   |
| A98.5 | Haemorrhagic fever with renal syndrome                                             |
| B07*  | Viral warts                                                                        |
| B08.0 | Other orthopoxvirus infections                                                     |
| B08.1 | Molluscum contagiosum                                                              |
| B08.3 | Erythema infectiosum [fifth disease]                                               |
| B08.8 | Other specified viral infections characterized by skin and mucous membrane lesions |
| B09*  | Unspecified viral infection characterized by skin and mucous membrane lesions      |
| B30*  | Viral conjunctivitis                                                               |
| B33.0 | Epidemic myalgia                                                                   |
| B33.1 | Ross River disease                                                                 |
| B33.2 | Viral carditis                                                                     |
| B33.4 | Hantavirus (cardio-)pulmonary syndrome [HPS] [HCPS]                                |
| B34.4 | Papovavirus infection, unspecified site                                            |
| B35*  | Dermatophytosis                                                                    |
| B36*  | Other superficial mycoses                                                          |
| B41   | Paracoccidioidomycosis                                                             |
| B41.0 | Pulmonary paracoccidioidomycosis                                                   |
| B41.7 | Disseminated paracoccidioidomycosis                                                |
| B41.8 | Other forms of paracoccidioidomycosis                                              |
| B41.9 | Paracoccidioidomycosis, unspecified                                                |
| B44*  | Aspergillosis                                                                      |
| B47   | Mycetoma                                                                           |
| B47.0 | Eumycetoma                                                                         |
| B47.9 | Mycetoma, unspecified                                                              |
| B48.0 | Lobomycosis                                                                        |
| B48.1 | Rhinosporidiosis                                                                   |
| B48.3 | Geotrichosis                                                                       |
| B48.4 | Penicilliosis                                                                      |
| B48.7 | Opportunistic mycoses                                                              |
| B48.8 | Other specified mycoses                                                            |
| B51*  | Plasmodium vivax malaria                                                           |
| B52*  | Plasmodium malariae malaria                                                        |
| B53   | Other parasitologically confirmed malaria                                          |
| B53.0 | Plasmodium ovale malaria                                                           |
| B53.8 | Other parasitologically confirmed malaria, not elsewhere classified                |
| B55.0 | Visceral leishmaniasis                                                             |
| B55.1 | Cutaneous leishmaniasis                                                            |
| B55.2 | Mucocutaneous leishmaniasis                                                        |
| B55.9 | Leishmaniasis, unspecified                                                         |
| B59*  | Pneumocystosis                                                                     |
| B60.0 | Babesiosis                                                                         |
| B60.8 | Other specified protozoal diseases                                                 |
| B65.0 | Schistosomiasis due to Schistosoma haematobium [urinary schistosomiasis]           |

|       |                                                                                                             |
|-------|-------------------------------------------------------------------------------------------------------------|
| B65.1 | Schistosomiasis due to <i>Schistosoma mansoni</i> [intestinal schistosomiasis]                              |
| B65.3 | Cercarial dermatitis                                                                                        |
| B65.8 | Other schistosomiasis                                                                                       |
| B66.0 | Opisthorchiasis                                                                                             |
| B66.1 | Clonorchiasis                                                                                               |
| B66.2 | Dicrocoeliasis                                                                                              |
| B66.3 | Fascioliasis                                                                                                |
| B66.5 | Fasciolopsiasis                                                                                             |
| B68.1 | <i>Taenia saginata</i> taeniasis                                                                            |
| B71   | Other cestode infections                                                                                    |
| B71.0 | Hymenolepiasis                                                                                              |
| B71.1 | Dipylidiasis                                                                                                |
| B71.9 | Cestode infection, unspecified                                                                              |
| B72*  | Dracunculiasis                                                                                              |
| B73*  | Onchocerciasis                                                                                              |
| B74*  | Filariasis                                                                                                  |
| B75*  | Trichinellosis                                                                                              |
| B76*  | Hookworm diseases                                                                                           |
| B77*  | Ascariasis                                                                                                  |
| B79*  | Trichuriasis                                                                                                |
| B80*  | Enterobiasis                                                                                                |
| B81.0 | Anisakiasis                                                                                                 |
| B81.1 | Intestinal capillariasis                                                                                    |
| B81.2 | Trichostrongyliasis                                                                                         |
| B82   | Unspecified intestinal parasitism                                                                           |
| B82.0 | Intestinal helminthiasis, unspecified                                                                       |
| B82.9 | Intestinal parasitism, unspecified                                                                          |
| B83   | Other helminthiasis                                                                                         |
| B83.3 | Syngamiasis                                                                                                 |
| B83.4 | Internal hirudiniasis                                                                                       |
| B83.8 | Other specified helminthiasis                                                                               |
| B83.9 | Helminthiasis, unspecified                                                                                  |
| B85*  | Pediculosis and phthiriasis                                                                                 |
| B86*  | Scabies                                                                                                     |
| B88.0 | Other acaridiasis                                                                                           |
| B88.1 | Tungiasis [sandflea infestation]                                                                            |
| B88.2 | Other arthropod infestations                                                                                |
| B88.3 | External hirudiniasis                                                                                       |
| B88.8 | Other specified infestations                                                                                |
| B88.9 | Infestation, unspecified                                                                                    |
| B89*  | Unspecified parasitic disease                                                                               |
| B95*  | <i>Streptococcus</i> and <i>staphylococcus</i> as the cause of diseases classified to other chapters        |
| B96.0 | <i>Mycoplasma pneumoniae</i> [ <i>M. pneumoniae</i> ] as the cause of diseases classified to other chapters |
| B96.1 | <i>Klebsiella pneumoniae</i> [ <i>K. pneumoniae</i> ] as the cause of diseases classified to other chapters |
| B96.2 | <i>Escherichia coli</i> [ <i>E. coli</i> ] as the cause of diseases classified to other chapters            |
| B96.4 | <i>Proteus (mirabilis)(morganii)</i> as the cause of diseases classified to other chapters                  |
| B96.5 | <i>Pseudomonas (aeruginosa)</i> as the cause of diseases classified to other chapters                       |
| B96.6 | <i>Bacillus fragilis</i> [ <i>B. fragilis</i> ] as the cause of diseases classified to other chapters       |

|       |                                                                                                |
|-------|------------------------------------------------------------------------------------------------|
| B96.7 | Clostridium perfringens [C. perfringens] as the cause of diseases classified to other chapters |
| B97.7 | Papillomavirus as the cause of diseases classified to other chapters                           |
| B98.0 | Helicobacter pylori [H.pylori] as the cause of diseases classified to other chapters           |
| B98.1 | Vibrio vulnificus as the cause of diseases classified to other chapters                        |
| B99*  | Other and unspecified infectious diseases                                                      |
| C46   | Kaposi sarcoma                                                                                 |
| D73.3 | Abscess of spleen                                                                              |
| E32.1 | Abscess of thymus                                                                              |
| H00*  | Hordeolum and chalazion                                                                        |
| H01.0 | Blepharitis                                                                                    |
| H06.1 | Parasitic infestation of orbit in diseases classified elsewhere                                |
| H10.0 | Mucopurulent conjunctivitis                                                                    |
| H10.5 | Blepharoconjunctivitis                                                                         |
| H13.0 | Filarial infection of conjunctiva                                                              |
| H44.0 | Purulent endophthalmitis                                                                       |
| H60.0 | Abscess of external ear                                                                        |
| H60.1 | Cellulitis of external ear                                                                     |
| H60.3 | Other infective otitis externa                                                                 |
| H62.0 | Otitis externa in bacterial diseases classified elsewhere                                      |
| H62.3 | Otitis externa in other infectious and parasitic diseases classified elsewhere                 |
| H66.0 | Acute suppurative otitis media                                                                 |
| H67.0 | Otitis media in bacterial diseases classified elsewhere                                        |
| H67.1 | Otitis media in viral diseases classified elsewhere                                            |
| I30.1 | Infective pericarditis                                                                         |
| I32.0 | Pericarditis in bacterial diseases classified elsewhere                                        |
| I32.1 | Pericarditis in other infectious and parasitic diseases classified elsewhere                   |
| I40.0 | Infective myocarditis                                                                          |
| I41.0 | Myocarditis in bacterial diseases classified elsewhere                                         |
| I41.1 | Myocarditis in viral diseases classified elsewhere                                             |
| I41.2 | Myocarditis in other infectious and parasitic diseases classified elsewhere                    |
| I43.0 | Cardiomyopathy in infectious and parasitic diseases classified elsewhere                       |
| I52.0 | Other heart disorders in bacterial diseases classified elsewhere                               |
| I52.1 | Other heart disorders in other infectious and parasitic diseases classified elsewhere          |
| J01.0 | Acute maxillary sinusitis                                                                      |
| J02   | Acute pharyngitis                                                                              |
| J02.0 | Streptococcal pharyngitis                                                                      |
| J02.8 | Acute pharyngitis due to other specified organisms                                             |
| J02.9 | Acute pharyngitis, unspecified                                                                 |
| J03   | Acute tonsillitis                                                                              |
| J03.0 | Streptococcal tonsillitis                                                                      |
| J03.8 | Acute tonsillitis due to other specified organisms                                             |
| J03.9 | Acute tonsillitis, unspecified                                                                 |
| J04*  | Acute laryngitis and tracheitis                                                                |
| J05.1 | Acute epiglottitis                                                                             |
| J09*  | Influenza due to certain identified influenza virus                                            |
| J10*  | Influenza due to other identified influenza virus                                              |
| J11*  | Influenza, virus not identified                                                                |
| J12*  | Viral pneumonia, not elsewhere classified                                                      |

|       |                                                                       |
|-------|-----------------------------------------------------------------------|
| J15   | Bacterial pneumonia, not elsewhere classified                         |
| J15.0 | Pneumonia due to <i>Klebsiella pneumoniae</i>                         |
| J15.1 | Pneumonia due to <i>Pseudomonas</i>                                   |
| J15.2 | Pneumonia due to staphylococcus                                       |
| J15.3 | Pneumonia due to streptococcus, group B                               |
| J15.4 | Pneumonia due to other streptococci                                   |
| J15.5 | Pneumonia due to <i>Escherichia coli</i>                              |
| J15.6 | Pneumonia due to other aerobic Gram-negative bacteria                 |
| J15.7 | Pneumonia due to <i>Mycoplasma pneumoniae</i>                         |
| J15.8 | Other bacterial pneumonia                                             |
| J15.9 | Bacterial pneumonia, unspecified                                      |
| J16   | Pneumonia due to other infectious organisms, not elsewhere classified |
| J16.0 | Chlamydial pneumonia                                                  |
| J16.8 | Pneumonia due to other specified infectious organisms                 |
| J17.0 | Pneumonia in bacterial diseases classified elsewhere                  |
| J17.1 | Pneumonia in viral diseases classified elsewhere                      |
| J17.3 | Pneumonia in parasitic diseases                                       |
| J18*  | Pneumonia, organism unspecified                                       |
| J20   | Acute bronchitis                                                      |
| J20.0 | Acute bronchitis due to <i>Mycoplasma pneumoniae</i>                  |
| J20.2 | Acute bronchitis due to streptococcus                                 |
| J20.3 | Acute bronchitis due to coxsackievirus                                |
| J20.4 | Acute bronchitis due to parainfluenza virus                           |
| J20.5 | Acute bronchitis due to respiratory syncytial virus                   |
| J20.6 | Acute bronchitis due to rhinovirus                                    |
| J20.7 | Acute bronchitis due to echovirus                                     |
| J20.8 | Acute bronchitis due to other specified organisms                     |
| J20.9 | Acute bronchitis, unspecified                                         |
| J21*  | Acute bronchiolitis                                                   |
| J21.0 | Acute bronchiolitis due to respiratory syncytial virus                |
| J21.1 | Acute bronchiolitis due to human metapneumovirus                      |
| J21.8 | Acute bronchiolitis due to other specified organisms                  |
| J21.9 | Acute bronchiolitis, unspecified                                      |
| J22*  | Unspecified acute lower respiratory infection                         |
| J36*  | Peritonsillar abscess                                                 |
| J39.0 | Retropharyngeal and parapharyngeal abscess                            |
| J39.1 | Other abscess of pharynx                                              |
| J85.1 | Abscess of lung with pneumonia                                        |
| J85.2 | Abscess of lung without pneumonia                                     |
| J85.3 | Abscess of mediastinum                                                |
| J86*  | Pyothorax                                                             |
| K02*  | Dental caries                                                         |
| K04.0 | Pulpitis                                                              |
| K04.4 | Acute apical periodontitis of pulpal origin                           |
| K04.5 | Chronic apical periodontitis                                          |
| K04.6 | Periapical abscess with sinus                                         |
| K04.7 | Periapical abscess without sinus                                      |
| K05.0 | Acute gingivitis                                                      |

|       |                                                                                     |
|-------|-------------------------------------------------------------------------------------|
| K05.2 | Acute periodontitis                                                                 |
| K05.3 | Chronic periodontitis                                                               |
| K05.4 | Periodontosis                                                                       |
| K11.3 | Abscess of salivary gland                                                           |
| K23.1 | Megaoesophagus in Chagas disease                                                    |
| K35*  | Acute appendicitis                                                                  |
| K57.0 | Diverticular disease of small intestine with perforation and abscess                |
| K57.2 | Diverticular disease of large intestine with perforation and abscess                |
| K57.4 | Diverticular disease of both small and large intestine with perforation and abscess |
| K57.8 | Diverticular disease of intestine, part unspecified, with perforation and abscess   |
| K61*  | Abscess of anal and rectal regions                                                  |
| K63.0 | Abscess of intestine                                                                |
| K67.0 | Chlamydial peritonitis                                                              |
| K67.1 | Gonococcal peritonitis                                                              |
| K67.8 | Other disorders of peritoneum in infectious diseases classified elsewhere           |
| K75.0 | Abscess of liver                                                                    |
| K75.1 | Phlebitis of portal vein                                                            |
| K77.0 | Liver disorders in infectious and parasitic diseases classified elsewhere           |
| L00*  | Staphylococcal scalded skin syndrome                                                |
| L01*  | Impetigo                                                                            |
| L02*  | Cutaneous abscess, furuncle and carbuncle                                           |
| L03*  | Cellulitis                                                                          |
| L04*  | Acute lymphadenitis                                                                 |
| L05.0 | Pilonidal cyst with abscess                                                         |
| L08*  | Other local infections of skin and subcutaneous tissue                              |
| L70.1 | Acne conglobata                                                                     |
| M00   | Pyogenic arthritis                                                                  |
| M00.0 | Staphylococcal arthritis and polyarthritis                                          |
| M00.2 | Other streptococcal arthritis and polyarthritis                                     |
| M00.8 | Arthritis and polyarthritis due to other specified bacterial agents                 |
| M00.9 | Pyogenic arthritis, unspecified                                                     |
| M01.3 | Arthritis in other bacterial diseases classified elsewhere                          |
| M01.6 | Arthritis in mycoses                                                                |
| M01.8 | Arthritis in other infectious and parasitic diseases classified elsewhere           |
| M46.2 | Osteomyelitis of vertebra                                                           |
| M46.3 | Infection of intervertebral disc (pyogenic)                                         |
| M46.5 | Other infective spondylopathies                                                     |
| M49.2 | Enterobacterial spondylitis                                                         |
| M49.3 | Spondylopathy in other infectious and parasitic diseases classified elsewhere       |
| M60.0 | Infective myositis                                                                  |
| M63.0 | Myositis in bacterial diseases classified elsewhere                                 |
| M63.1 | Myositis in protozoal and parasitic infections classified elsewhere                 |
| M63.2 | Myositis in other infectious diseases classified elsewhere                          |
| M65.0 | Abscess of tendon sheath                                                            |
| M65.1 | Other infective (teno)synovitis                                                     |
| M71.0 | Abscess of bursa                                                                    |
| M71.1 | Other infective bursitis                                                            |
| M72.6 | Necrotizing fasciitis                                                               |

|       |                                                                                                    |
|-------|----------------------------------------------------------------------------------------------------|
| M73.0 | Gonococcal bursitis                                                                                |
| M86*  | Osteomyelitis                                                                                      |
| M86.0 | Acute haematogenous osteomyelitis                                                                  |
| M86.1 | Other acute osteomyelitis                                                                          |
| M86.2 | Subacute osteomyelitis                                                                             |
| M86.3 | Chronic multifocal osteomyelitis                                                                   |
| M86.4 | Chronic osteomyelitis with draining sinus                                                          |
| M86.5 | Other chronic haematogenous osteomyelitis                                                          |
| M86.6 | Other chronic osteomyelitis                                                                        |
| M86.8 | Other osteomyelitis                                                                                |
| M86.9 | Osteomyelitis, unspecified                                                                         |
| N08.0 | Glomerular disorders in infectious and parasitic diseases classified elsewhere                     |
| N10*  | Acute tubulo-interstitial nephritis                                                                |
| N13.6 | Pyonephrosis                                                                                       |
| N15.1 | Renal and perinephric abscess                                                                      |
| N16.0 | Renal tubulo-interstitial disorders in infectious and parasitic diseases classified elsewhere      |
| N29.1 | Other disorders of kidney and ureter in infectious and parasitic diseases classified elsewhere     |
| N30.0 | Acute cystitis                                                                                     |
| N34.0 | Urethral abscess                                                                                   |
| N39.0 | Urinary tract infection, site not specified                                                        |
| N41.0 | Acute prostatitis                                                                                  |
| N41.2 | Abscess of prostate                                                                                |
| N45*  | Orchitis and epididymitis                                                                          |
| N61*  | Inflammatory disorders of breast                                                                   |
| N70.0 | Acute salpingitis and oophoritis                                                                   |
| N71.0 | Acute inflammatory disease of uterus                                                               |
| N73.0 | Acute parametritis and pelvic cellulitis                                                           |
| N73.3 | Female acute pelvic peritonitis                                                                    |
| N74   | Female pelvic inflammatory disorders in diseases classified elsewhere                              |
| N74.3 | Female gonococcal pelvic inflammatory disease                                                      |
| N74.4 | Female chlamydial pelvic inflammatory disease                                                      |
| N74.8 | Female pelvic inflammatory disorders in other diseases classified elsewhere                        |
| N75.1 | Abscess of Bartholin gland                                                                         |
| N76.0 | Acute vaginitis                                                                                    |
| N76.4 | Abscess of vulva                                                                                   |
| N77.0 | Ulceration of vulva in infectious and parasitic diseases classified elsewhere                      |
| N77.1 | Vaginitis, vulvitis and vulvovaginitis in infectious and parasitic diseases classified elsewhere   |
| O03.0 | Spontaneous abortion: Incomplete, complicated by genital tract and pelvic infection                |
| O03.5 | Spontaneous abortion: Complete or unspecified, complicated by genital tract and pelvic infection   |
| O04.0 | Medical abortion: Incomplete, complicated by genital tract and pelvic infection                    |
| O04.5 | Medical abortion: Complete or unspecified, complicated by genital tract and pelvic infection       |
| O05.0 | Other abortion: Incomplete, complicated by genital tract and pelvic infection                      |
| O05.5 | Other abortion: Complete or unspecified, complicated by genital tract and pelvic infection         |
| O06.0 | Unspecified abortion: Incomplete, complicated by genital tract and pelvic infection                |
| O06.5 | Unspecified abortion: Complete or unspecified, complicated by genital tract and pelvic infection   |
| O07.0 | Failed medical abortion, complicated by genital tract and pelvic infection                         |
| O07.5 | Other and unspecified failed attempted abortion, complicated by genital tract and pelvic infection |
| O08.0 | Genital tract and pelvic infection following abortion and ectopic and molar pregnancy              |



|       |                                                                                                                             |
|-------|-----------------------------------------------------------------------------------------------------------------------------|
| O23.0 | Infections of kidney in pregnancy                                                                                           |
| O23.1 | Infections of bladder in pregnancy                                                                                          |
| O23.2 | Infections of urethra in pregnancy                                                                                          |
| O23.3 | Infections of other parts of urinary tract in pregnancy                                                                     |
| O23.4 | Unspecified infection of urinary tract in pregnancy                                                                         |
| O23.5 | Infections of the genital tract in pregnancy                                                                                |
| O23.9 | Other and unspecified genitourinary tract infection in pregnancy                                                            |
| O75.3 | Other infection during labour                                                                                               |
| O85*  | Puerperal sepsis                                                                                                            |
| O86*  | Other puerperal infections                                                                                                  |
| O91.0 | Infection of nipple associated with childbirth                                                                              |
| O91.1 | Abscess of breast associated with childbirth                                                                                |
| O98   | Maternal infectious and parasitic diseases classifiable elsewhere but complicating pregnancy, childbirth and the puerperium |
| O98.2 | Gonorrhoea complicating pregnancy, childbirth and the puerperium                                                            |
| O98.3 | Other infections with a predominantly sexual mode of transmission complicating pregnancy, childbirth and the puerperium     |
| O98.6 | Protozoal diseases complicating pregnancy, childbirth and the puerperium                                                    |
| O98.8 | Other maternal infectious and parasitic diseases complicating pregnancy, childbirth and the puerperium                      |
| O98.9 | Unspecified maternal infectious or parasitic disease complicating pregnancy, childbirth and the puerperium                  |
| P23   | Congenital pneumonia                                                                                                        |
| P23.0 | Congenital pneumonia due to viral agent                                                                                     |
| P23.1 | Congenital pneumonia due to Chlamydia                                                                                       |
| P23.2 | Congenital pneumonia due to staphylococcus                                                                                  |
| P23.5 | Congenital pneumonia due to Pseudomonas                                                                                     |
| P23.6 | Congenital pneumonia due to other bacterial agents                                                                          |
| P23.8 | Congenital pneumonia due to other organisms                                                                                 |
| P23.9 | Congenital pneumonia, unspecified                                                                                           |
| P36.1 | Sepsis of newborn due to other and unspecified streptococci                                                                 |
| P36.2 | Sepsis of newborn due to Staphylococcus aureus                                                                              |
| P36.3 | Sepsis of newborn due to other and unspecified staphylococci                                                                |
| P36.5 | Sepsis of newborn due to anaerobes                                                                                          |
| P36.8 | Other bacterial sepsis of newborn                                                                                           |
| P36.9 | Bacterial sepsis of newborn, unspecified                                                                                    |
| P37   | Other congenital infectious and parasitic diseases                                                                          |
| P37.4 | Other congenital malaria                                                                                                    |
| P37.8 | Other specified congenital infectious and parasitic diseases                                                                |
| P37.9 | Congenital infectious and parasitic disease, unspecified                                                                    |
| P38*  | Omphalitis of newborn with or without mild haemorrhage                                                                      |
| P39   | Other infections specific to the perinatal period                                                                           |
| P39.0 | Neonatal infective mastitis                                                                                                 |
| P39.1 | Neonatal conjunctivitis and dacryocystitis                                                                                  |
| P39.3 | Neonatal urinary tract infection                                                                                            |
| P39.4 | Neonatal skin infection                                                                                                     |
| P39.8 | Other specified infections specific to the perinatal period                                                                 |
| P39.9 | Infection specific to the perinatal period, unspecified                                                                     |
| R57.2 | Septic shock                                                                                                                |
| R65.0 | Systemic Inflammatory Response Syndrome of infectious origin without organ failure                                          |
| R65.1 | Systemic Inflammatory Response Syndrome of infectious origin with organ failure                                             |

## All viral infections

|       |                                                                            |
|-------|----------------------------------------------------------------------------|
| A08.0 | Rotaviral enteritis                                                        |
| A08.1 | Acute gastroenteropathy due to Norwalk agent                               |
| A08.2 | Adenoviral enteritis                                                       |
| A08.3 | Other viral enteritis                                                      |
| A08.4 | Viral intestinal infection, unspecified                                    |
| A60*  | Anogenital herpesviral [herpes simplex] infection                          |
| A63.0 | Anogenital (venereal) warts                                                |
| A80*  | Acute poliomyelitis                                                        |
| A81.1 | Subacute sclerosing panencephalitis                                        |
| A81.2 | Progressive multifocal leukoencephalopathy                                 |
| A83*  | Mosquito-borne viral encephalitis                                          |
| A84*  | Tick-borne viral encephalitis                                              |
| A85*  | Other viral encephalitis, not elsewhere classified                         |
| A86*  | Unspecified viral encephalitis                                             |
| A87*  | Viral meningitis                                                           |
| A88*  | Other viral infections of central nervous system, not elsewhere classified |
| A89*  | Unspecified viral infection of central nervous system                      |
| A90*  | Dengue fever [classical dengue]                                            |
| A91*  | Dengue haemorrhagic fever                                                  |
| A92   | Other mosquito-borne viral fevers                                          |
| A92.0 | Chikungunya virus disease                                                  |
| A92.1 | O'nyong-nyong fever                                                        |
| A92.2 | Venezuelan equine fever                                                    |
| A92.3 | West Nile virus infection                                                  |
| A92.4 | Rift Valley fever                                                          |
| A92.8 | Other specified mosquito-borne viral fevers                                |
| A92.9 | Mosquito-borne viral fever, unspecified                                    |
| A93   | Other arthropod-borne viral fevers, not elsewhere classified               |
| A93.0 | Oropouche virus disease                                                    |
| A93.1 | Sandfly fever                                                              |
| A93.2 | Colorado tick fever                                                        |
| A93.8 | Other specified arthropod-borne viral fevers                               |
| A94*  | Unspecified arthropod-borne viral fever                                    |
| A95*  | Yellow fever                                                               |
| A96*  | Arenaviral haemorrhagic fever                                              |
| A97*  | Dengue                                                                     |
| A98   | Other viral haemorrhagic fevers, not elsewhere classified                  |
| A98.0 | Crimean-Congo haemorrhagic fever                                           |
| A98.1 | Omsk haemorrhagic fever                                                    |
| A98.2 | Kyasanur Forest disease                                                    |
| A98.3 | Marburg virus disease                                                      |
| A98.4 | Ebola virus disease                                                        |
| A98.5 | Haemorrhagic fever with renal syndrome                                     |
| A98.8 | Other specified viral haemorrhagic fevers                                  |

|       |                                                                                    |
|-------|------------------------------------------------------------------------------------|
| A99*  | Unspecified viral haemorrhagic fever                                               |
| B00   | Herpesviral [herpes simplex] infections                                            |
| B00.0 | Eczema herpeticum                                                                  |
| B00.1 | Herpesviral vesicular dermatitis                                                   |
| B00.2 | Herpesviral gingivostomatitis and pharyngotonsillitis                              |
| B00.3 | Herpesviral meningitis                                                             |
| B00.4 | Herpesviral encephalitis                                                           |
| B00.5 | Herpesviral ocular disease                                                         |
| B00.7 | Disseminated herpesviral disease                                                   |
| B00.8 | Other forms of herpesviral infection                                               |
| B00.9 | Herpesviral infection, unspecified                                                 |
| B01   | Varicella [chickenpox]                                                             |
| B01.0 | Varicella meningitis                                                               |
| B01.1 | Varicella encephalitis                                                             |
| B01.2 | Varicella pneumonia                                                                |
| B01.8 | Varicella with other complications                                                 |
| B01.9 | Varicella without complication                                                     |
| B02   | Zoster [herpes zoster]                                                             |
| B02.0 | Zoster encephalitis                                                                |
| B02.1 | Zoster meningitis                                                                  |
| B02.2 | Zoster with other nervous system involvement                                       |
| B02.3 | Zoster ocular disease                                                              |
| B02.7 | Disseminated zoster                                                                |
| B02.8 | Zoster with other complications                                                    |
| B02.9 | Zoster without complication                                                        |
| B04*  | Monkeypox                                                                          |
| B05   | Measles                                                                            |
| B05.0 | Measles complicated by encephalitis                                                |
| B05.1 | Measles complicated by meningitis                                                  |
| B05.2 | Measles complicated by pneumonia                                                   |
| B05.3 | Measles complicated by otitis media                                                |
| B05.4 | Measles with intestinal complications                                              |
| B05.8 | Measles with other complications                                                   |
| B05.9 | Measles without complication                                                       |
| B06   | Rubella [German measles]                                                           |
| B06.0 | Rubella with neurological complications                                            |
| B06.8 | Rubella with other complications                                                   |
| B06.9 | Rubella without complication                                                       |
| B07*  | Viral warts                                                                        |
| B08.0 | Other orthopoxvirus infections                                                     |
| B08.1 | Molluscum contagiosum                                                              |
| B08.2 | Exanthema subitum [sixth disease]                                                  |
| B08.3 | Erythema infectiosum [fifth disease]                                               |
| B08.4 | Enteroviral vesicular stomatitis with exanthem                                     |
| B08.5 | Enteroviral vesicular pharyngitis                                                  |
| B08.8 | Other specified viral infections characterized by skin and mucous membrane lesions |
| B09*  | Unspecified viral infection characterized by skin and mucous membrane lesions      |
| B15   | Acute hepatitis A                                                                  |

|       |                                                                                           |
|-------|-------------------------------------------------------------------------------------------|
| B15.0 | Hepatitis A with hepatic coma                                                             |
| B15.9 | Hepatitis A without hepatic coma                                                          |
| B16   | Acute hepatitis B                                                                         |
| B16.0 | Acute hepatitis B with delta-agent (coinfection) with hepatic coma                        |
| B16.1 | Acute hepatitis B with delta-agent (coinfection) without hepatic coma                     |
| B16.2 | Acute hepatitis B without delta-agent with hepatic coma                                   |
| B16.9 | Acute hepatitis B without delta-agent and without hepatic coma                            |
| B17*  | Other acute viral hepatitis                                                               |
| B18*  | Chronic viral hepatitis                                                                   |
| B19   | Unspecified viral hepatitis                                                               |
| B19.0 | Unspecified viral hepatitis with hepatic coma                                             |
| B19.9 | Unspecified viral hepatitis without hepatic coma                                          |
| B20*  | Human immunodeficiency virus [HIV] disease resulting in infectious and parasitic diseases |
| B21*  | Human immunodeficiency virus [HIV] disease resulting in malignant neoplasms               |
| B21.0 | HIV disease resulting in Kaposi sarcoma                                                   |
| B22   | Human immunodeficiency virus [HIV] disease resulting in other specified diseases          |
| B22.0 | HIV disease resulting in encephalopathy                                                   |
| B22.1 | HIV disease resulting in lymphoid interstitial pneumonitis                                |
| B22.2 | HIV disease resulting in wasting syndrome                                                 |
| B22.7 | HIV disease resulting in multiple diseases classified elsewhere                           |
| B23*  | Human immunodeficiency virus [HIV] disease resulting in other conditions                  |
| B24*  | Unspecified human immunodeficiency virus [HIV] disease                                    |
| B25*  | Cytomegaloviral disease                                                                   |
| B26   | Mumps                                                                                     |
| B26.0 | Mumps orchitis                                                                            |
| B26.1 | Mumps meningitis                                                                          |
| B26.2 | Mumps encephalitis                                                                        |
| B26.3 | Mumps pancreatitis                                                                        |
| B26.8 | Mumps with other complications                                                            |
| B26.9 | Mumps without complication                                                                |
| B27   | Infectious mononucleosis                                                                  |
| B27.0 | Gammaherpesviral mononucleosis                                                            |
| B27.1 | Cytomegaloviral mononucleosis                                                             |
| B27.9 | Infectious mononucleosis, unspecified                                                     |
| B30*  | Viral conjunctivitis                                                                      |
| B33   | Other viral diseases, not elsewhere classified                                            |
| B33.0 | Epidemic myalgia                                                                          |
| B33.1 | Ross River disease                                                                        |
| B33.2 | Viral carditis                                                                            |
| B33.3 | Retrovirus infections, not elsewhere classified                                           |
| B33.4 | Hantavirus (cardio-)pulmonary syndrome [HPS] [HCPS]                                       |
| B33.8 | Other specified viral diseases                                                            |
| B34   | Viral infection of unspecified site                                                       |
| B34.0 | Adenovirus infection, unspecified site                                                    |
| B34.1 | Enterovirus infection, unspecified site                                                   |
| B34.2 | Coronavirus infection, unspecified site                                                   |
| B34.3 | Parvovirus infection, unspecified site                                                    |
| B34.4 | Papovavirus infection, unspecified site                                                   |

|       |                                                                                                  |
|-------|--------------------------------------------------------------------------------------------------|
| B34.8 | Other viral infections of unspecified site                                                       |
| B34.9 | Viral infection, unspecified                                                                     |
| B97   | Viral agents as the cause of diseases classified to other chapters                               |
| B97.0 | Adenovirus as the cause of diseases classified to other chapters                                 |
| B97.1 | Enterovirus as the cause of diseases classified to other chapters                                |
| B97.2 | Coronavirus as the cause of diseases classified to other chapters                                |
| B97.3 | Retrovirus as the cause of diseases classified to other chapters                                 |
| B97.4 | Respiratory syncytial virus as the cause of diseases classified to other chapters                |
| B97.5 | Reovirus as the cause of diseases classified to other chapters                                   |
| B97.6 | Parvovirus as the cause of diseases classified to other chapters                                 |
| B97.7 | Papillomavirus as the cause of diseases classified to other chapters                             |
| B97.8 | Other viral agents as the cause of diseases classified to other chapters                         |
| C46   | Kaposi sarcoma                                                                                   |
| G02.0 | Meningitis in viral diseases classified elsewhere                                                |
| G04.1 | Tropical spastic paraplegia                                                                      |
| G05.1 | Encephalitis, myelitis and encephalomyelitis in viral diseases classified elsewhere              |
| H19.1 | Herpesviral keratitis and keratoconjunctivitis                                                   |
| H62.1 | Otitis externa in viral diseases classified elsewhere                                            |
| H67.1 | Otitis media in viral diseases classified elsewhere                                              |
| I41.1 | Myocarditis in viral diseases classified elsewhere                                               |
| J09*  | Influenza due to certain identified influenza virus                                              |
| J10*  | Influenza due to other identified influenza virus                                                |
| J11*  | Influenza, virus not identified                                                                  |
| J12*  | Viral pneumonia, not elsewhere classified                                                        |
| J17.1 | Pneumonia in viral diseases classified elsewhere                                                 |
| J20.3 | Acute bronchitis due to coxsackievirus                                                           |
| J20.4 | Acute bronchitis due to parainfluenza virus                                                      |
| J20.5 | Acute bronchitis due to respiratory syncytial virus                                              |
| J20.6 | Acute bronchitis due to rhinovirus                                                               |
| J20.7 | Acute bronchitis due to echovirus                                                                |
| J21*  | Acute bronchiolitis                                                                              |
| J21.0 | Acute bronchiolitis due to respiratory syncytial virus                                           |
| J21.1 | Acute bronchiolitis due to human metapneumovirus                                                 |
| J21.8 | Acute bronchiolitis due to other specified organisms                                             |
| J21.9 | Acute bronchiolitis, unspecified                                                                 |
| M01.4 | Rubella arthritis                                                                                |
| M01.5 | Arthritis in other viral diseases classified elsewhere                                           |
| O98.4 | Viral hepatitis complicating pregnancy, childbirth and the puerperium                            |
| O98.5 | Other viral diseases complicating pregnancy, childbirth and the puerperium                       |
| O98.7 | Human immunodeficiency virus [HIV] disease complicating pregnancy, childbirth and the puerperium |
| P23.0 | Congenital pneumonia due to viral agent                                                          |
| P35.0 | Congenital rubella syndrome                                                                      |
| P35.1 | Congenital cytomegalovirus infection                                                             |
| P35.2 | Congenital herpesviral [herpes simplex] infection                                                |
| P35.3 | Congenital viral hepatitis                                                                       |
| Z21   | Asymptomatic human immunodeficiency virus [HIV] infection status                                 |

## Acute viral infections

|       |                                                                            |
|-------|----------------------------------------------------------------------------|
| A08.0 | Rotaviral enteritis                                                        |
| A08.1 | Acute gastroenteropathy due to Norwalk agent                               |
| A08.2 | Adenoviral enteritis                                                       |
| A08.3 | Other viral enteritis                                                      |
| A08.4 | Viral intestinal infection, unspecified                                    |
| A80*  | Acute poliomyelitis                                                        |
| A83*  | Mosquito-borne viral encephalitis                                          |
| A84*  | Tick-borne viral encephalitis                                              |
| A85*  | Other viral encephalitis, not elsewhere classified                         |
| A86*  | Unspecified viral encephalitis                                             |
| A87*  | Viral meningitis                                                           |
| A88*  | Other viral infections of central nervous system, not elsewhere classified |
| A89*  | Unspecified viral infection of central nervous system                      |
| A90*  | Dengue fever [classical dengue]                                            |
| A91*  | Dengue haemorrhagic fever                                                  |
| A92   | Other mosquito-borne viral fevers                                          |
| A92.0 | Chikungunya virus disease                                                  |
| A92.1 | O'nyong-nyong fever                                                        |
| A92.2 | Venezuelan equine fever                                                    |
| A92.3 | West Nile virus infection                                                  |
| A92.4 | Rift Valley fever                                                          |
| A92.8 | Other specified mosquito-borne viral fevers                                |
| A92.9 | Mosquito-borne viral fever, unspecified                                    |
| A93   | Other arthropod-borne viral fevers, not elsewhere classified               |
| A93.0 | Oropouche virus disease                                                    |
| A93.1 | Sandfly fever                                                              |
| A93.2 | Colorado tick fever                                                        |
| A93.8 | Other specified arthropod-borne viral fevers                               |
| A94*  | Unspecified arthropod-borne viral fever                                    |
| A95*  | Yellow fever                                                               |
| A96*  | Arenaviral haemorrhagic fever                                              |
| A97*  | Dengue                                                                     |
| A98   | Other viral haemorrhagic fevers, not elsewhere classified                  |
| A98.0 | Crimean-Congo haemorrhagic fever                                           |
| A98.1 | Omsk haemorrhagic fever                                                    |
| A98.2 | Kyasanur Forest disease                                                    |
| A98.3 | Marburg virus disease                                                      |
| A98.4 | Ebola virus disease                                                        |
| A98.5 | Haemorrhagic fever with renal syndrome                                     |
| A98.8 | Other specified viral haemorrhagic fevers                                  |
| A99*  | Unspecified viral haemorrhagic fever                                       |
| B04*  | Monkeypox                                                                  |
| B05   | Measles                                                                    |
| B05.0 | Measles complicated by encephalitis                                        |

|       |                                                                                    |
|-------|------------------------------------------------------------------------------------|
| B05.1 | Measles complicated by meningitis                                                  |
| B05.2 | Measles complicated by pneumonia                                                   |
| B05.3 | Measles complicated by otitis media                                                |
| B05.4 | Measles with intestinal complications                                              |
| B05.8 | Measles with other complications                                                   |
| B05.9 | Measles without complication                                                       |
| B06   | Rubella [German measles]                                                           |
| B06.0 | Rubella with neurological complications                                            |
| B06.8 | Rubella with other complications                                                   |
| B06.9 | Rubella without complication                                                       |
| B07*  | Viral warts                                                                        |
| B08.0 | Other orthopoxvirus infections                                                     |
| B08.1 | Molluscum contagiosum                                                              |
| B08.3 | Erythema infectiosum [fifth disease]                                               |
| B08.4 | Enteroviral vesicular stomatitis with exanthem                                     |
| B08.5 | Enteroviral vesicular pharyngitis                                                  |
| B08.8 | Other specified viral infections characterized by skin and mucous membrane lesions |
| B09*  | Unspecified viral infection characterized by skin and mucous membrane lesions      |
| B15   | Acute hepatitis A                                                                  |
| B15.0 | Hepatitis A with hepatic coma                                                      |
| B15.9 | Hepatitis A without hepatic coma                                                   |
| B16   | Acute hepatitis B                                                                  |
| B16.0 | Acute hepatitis B with delta-agent (coinfection) with hepatic coma                 |
| B16.1 | Acute hepatitis B with delta-agent (coinfection) without hepatic coma              |
| B16.2 | Acute hepatitis B without delta-agent with hepatic coma                            |
| B16.9 | Acute hepatitis B without delta-agent and without hepatic coma                     |
| B17*  | Other acute viral hepatitis                                                        |
| B19   | Unspecified viral hepatitis                                                        |
| B19.0 | Unspecified viral hepatitis with hepatic coma                                      |
| B19.9 | Unspecified viral hepatitis without hepatic coma                                   |
| B26   | Mumps                                                                              |
| B26.0 | Mumps orchitis                                                                     |
| B26.1 | Mumps meningitis                                                                   |
| B26.2 | Mumps encephalitis                                                                 |
| B26.3 | Mumps pancreatitis                                                                 |
| B26.8 | Mumps with other complications                                                     |
| B26.9 | Mumps without complication                                                         |
| B30*  | Viral conjunctivitis                                                               |
| B33   | Other viral diseases, not elsewhere classified                                     |
| B33.0 | Epidemic myalgia                                                                   |
| B33.1 | Ross River disease                                                                 |
| B33.2 | Viral carditis                                                                     |
| B33.4 | Hantavirus (cardio-)pulmonary syndrome [HPS] [HCPS]                                |
| B33.8 | Other specified viral diseases                                                     |
| B34   | Viral infection of unspecified site                                                |
| B34.0 | Adenovirus infection, unspecified site                                             |
| B34.1 | Enterovirus infection, unspecified site                                            |
| B34.2 | Coronavirus infection, unspecified site                                            |

|       |                                                                                   |
|-------|-----------------------------------------------------------------------------------|
| B34.3 | Parvovirus infection, unspecified site                                            |
| B34.8 | Other viral infections of unspecified site                                        |
| B34.9 | Viral infection, unspecified                                                      |
| B97   | Viral agents as the cause of diseases classified to other chapters                |
| B97.0 | Adenovirus as the cause of diseases classified to other chapters                  |
| B97.1 | Enterovirus as the cause of diseases classified to other chapters                 |
| B97.2 | Coronavirus as the cause of diseases classified to other chapters                 |
| B97.4 | Respiratory syncytial virus as the cause of diseases classified to other chapters |
| B97.5 | Reovirus as the cause of diseases classified to other chapters                    |
| B97.6 | Parvovirus as the cause of diseases classified to other chapters                  |
| B97.8 | Other viral agents as the cause of diseases classified to other chapters          |
| H67.1 | Otitis media in viral diseases classified elsewhere                               |
| I41.1 | Myocarditis in viral diseases classified elsewhere                                |
| J09*  | Influenza due to certain identified influenza virus                               |
| J10*  | Influenza due to other identified influenza virus                                 |
| J11*  | Influenza, virus not identified                                                   |
| J12*  | Viral pneumonia, not elsewhere classified                                         |
| J17.1 | Pneumonia in viral diseases classified elsewhere                                  |
| J20.3 | Acute bronchitis due to coxsackievirus                                            |
| J20.4 | Acute bronchitis due to parainfluenza virus                                       |
| J20.5 | Acute bronchitis due to respiratory syncytial virus                               |
| J20.6 | Acute bronchitis due to rhinovirus                                                |
| J20.7 | Acute bronchitis due to echovirus                                                 |
| J21*  | Acute bronchiolitis                                                               |
| J21.0 | Acute bronchiolitis due to respiratory syncytial virus                            |
| J21.1 | Acute bronchiolitis due to human metapneumovirus                                  |
| J21.8 | Acute bronchiolitis due to other specified organisms                              |
| J21.9 | Acute bronchiolitis, unspecified                                                  |
| M01.4 | Rubella arthritis                                                                 |
| M01.5 | Arthritis in other viral diseases classified elsewhere                            |
| O98.5 | Other viral diseases complicating pregnancy, childbirth and the puerperium        |
| P23.0 | Congenital pneumonia due to viral agent                                           |
| P35.0 | Congenital rubella syndrome                                                       |

### Herpesvirus infections

|       |                                                       |
|-------|-------------------------------------------------------|
| A60*  | Anogenital herpesviral [herpes simplex] infection     |
| B00   | Herpesviral [herpes simplex] infections               |
| B00.0 | Eczema herpeticum                                     |
| B00.1 | Herpesviral vesicular dermatitis                      |
| B00.2 | Herpesviral gingivostomatitis and pharyngotonsillitis |
| B00.3 | Herpesviral meningitis                                |
| B00.4 | Herpesviral encephalitis                              |
| B00.5 | Herpesviral ocular disease                            |
| B00.7 | Disseminated herpesviral disease                      |
| B00.8 | Other forms of herpesviral infection                  |



|       |                                                   |
|-------|---------------------------------------------------|
| B00.9 | Herpesviral infection, unspecified                |
| B01   | Varicella [chickenpox]                            |
| B01.0 | Varicella meningitis                              |
| B01.1 | Varicella encephalitis                            |
| B01.2 | Varicella pneumonia                               |
| B01.8 | Varicella with other complications                |
| B01.9 | Varicella without complication                    |
| B02   | Zoster [herpes zoster]                            |
| B02.0 | Zoster encephalitis                               |
| B02.1 | Zoster meningitis                                 |
| B02.2 | Zoster with other nervous system involvement      |
| B02.3 | Zoster ocular disease                             |
| B02.7 | Disseminated zoster                               |
| B02.8 | Zoster with other complications                   |
| B02.9 | Zoster without complication                       |
| B08.2 | Exanthema subitum [sixth disease]                 |
| B21.0 | HIV disease resulting in Kaposi sarcoma           |
| B25*  | Cytomegaloviral disease                           |
| B27   | Infectious mononucleosis                          |
| B27.0 | Gammaherpesviral mononucleosis                    |
| B27.1 | Cytomegaloviral mononucleosis                     |
| B27.9 | Infectious mononucleosis, unspecified             |
| C46   | Kaposi sarcoma                                    |
| H19.1 | Herpesviral keratitis and keratoconjunctivitis    |
| P35.1 | Congenital cytomegalovirus infection              |
| P35.2 | Congenital herpesviral [herpes simplex] infection |

#### Other potentially persistent viral infections

|       |                                                                                           |
|-------|-------------------------------------------------------------------------------------------|
| A63.0 | Anogenital (venereal) warts                                                               |
| A81.1 | Subacute sclerosing panencephalitis                                                       |
| A81.2 | Progressive multifocal leukoencephalopathy                                                |
| B18*  | Chronic viral hepatitis                                                                   |
| B20*  | Human immunodeficiency virus [HIV] disease resulting in infectious and parasitic diseases |
| B21*  | Human immunodeficiency virus [HIV] disease resulting in malignant neoplasms               |
| B22   | Human immunodeficiency virus [HIV] disease resulting in other specified diseases          |
| B22.0 | HIV disease resulting in encephalopathy                                                   |
| B22.1 | HIV disease resulting in lymphoid interstitial pneumonitis                                |
| B22.2 | HIV disease resulting in wasting syndrome                                                 |
| B22.7 | HIV disease resulting in multiple diseases classified elsewhere                           |
| B23*  | Human immunodeficiency virus [HIV] disease resulting in other conditions                  |
| B24*  | Unspecified human immunodeficiency virus [HIV] disease                                    |
| B33.3 | Retrovirus infections, not elsewhere classified                                           |
| B34.4 | Papovavirus infection, unspecified site                                                   |
| B97.3 | Retrovirus as the cause of diseases classified to other chapters                          |
| B97.7 | Papillomavirus as the cause of diseases classified to other chapters                      |

|       |                                                                                                  |
|-------|--------------------------------------------------------------------------------------------------|
| G04.1 | Tropical spastic paraplegia                                                                      |
| O98.4 | Viral hepatitis complicating pregnancy, childbirth and the puerperium                            |
| O98.7 | Human immunodeficiency virus [HIV] disease complicating pregnancy, childbirth and the puerperium |
| P35.3 | Congenital viral hepatitis                                                                       |
| Z21   | Asymptomatic human immunodeficiency virus [HIV] infection status                                 |

## Parasitic infections

|       |                                                                     |
|-------|---------------------------------------------------------------------|
| A06   | Amoebiasis                                                          |
| A06.0 | Acute amoebic dysentery                                             |
| A06.1 | Chronic intestinal amoebiasis                                       |
| A06.2 | Amoebic nondysenteric colitis                                       |
| A06.3 | Amoeboma of intestine                                               |
| A06.4 | Amoebic liver abscess                                               |
| A06.5 | Amoebic lung abscess                                                |
| A06.6 | Amoebic brain abscess                                               |
| A06.7 | Cutaneous amoebiasis                                                |
| A06.8 | Amoebic infection of other sites                                    |
| A06.9 | Amoebiasis, unspecified                                             |
| A07*  | Other protozoal intestinal diseases                                 |
| A59*  | Trichomoniasis                                                      |
| B50*  | Plasmodium falciparum malaria                                       |
| B50.0 | Plasmodium falciparum malaria with cerebral complications           |
| B50.8 | Other severe and complicated Plasmodium falciparum malaria          |
| B50.9 | Plasmodium falciparum malaria, unspecified                          |
| B51*  | Plasmodium vivax malaria                                            |
| B52*  | Plasmodium malariae malaria                                         |
| B53   | Other parasitologically confirmed malaria                           |
| B53.0 | Plasmodium ovale malaria                                            |
| B53.1 | Malaria due to simian plasmodia                                     |
| B53.8 | Other parasitologically confirmed malaria, not elsewhere classified |
| B54*  | Unspecified malaria                                                 |
| B55.0 | Visceral leishmaniasis                                              |
| B55.1 | Cutaneous leishmaniasis                                             |
| B55.2 | Mucocutaneous leishmaniasis                                         |
| B55.9 | Leishmaniasis, unspecified                                          |
| B56*  | African trypanosomiasis                                             |
| B57*  | Chagas disease                                                      |
| B58   | Toxoplasmosis                                                       |
| B58.0 | Toxoplasma oculopathy                                               |
| B58.1 | Toxoplasma hepatitis                                                |
| B58.2 | Toxoplasma meningoencephalitis                                      |
| B58.3 | Pulmonary toxoplasmosis                                             |
| B58.8 | Toxoplasmosis with other organ involvement                          |
| B58.9 | Toxoplasmosis, unspecified                                          |
| B60.0 | Babesiosis                                                          |

|       |                                                                                 |
|-------|---------------------------------------------------------------------------------|
| B60.1 | Acanthamoebiasis                                                                |
| B60.2 | Naegleriasis                                                                    |
| B60.8 | Other specified protozoal diseases                                              |
| B64*  | Unspecified protozoal disease                                                   |
| B65   | Schistosomiasis [bilharziasis]                                                  |
| B65.0 | Schistosomiasis due to <i>Schistosoma haematobium</i> [urinary schistosomiasis] |
| B65.1 | Schistosomiasis due to <i>Schistosoma mansoni</i> [intestinal schistosomiasis]  |
| B65.2 | Schistosomiasis due to <i>Schistosoma japonicum</i>                             |
| B65.3 | Cercarial dermatitis                                                            |
| B65.8 | Other schistosomiasis                                                           |
| B65.9 | Schistosomiasis, unspecified                                                    |
| B66   | Other fluke infections                                                          |
| B66.0 | Opisthorchiasis                                                                 |
| B66.1 | Clonorchiasis                                                                   |
| B66.2 | Dicrocoeliasis                                                                  |
| B66.3 | Fascioliasis                                                                    |
| B66.4 | Paragonimiasis                                                                  |
| B66.5 | Fasciolopsiasis                                                                 |
| B66.8 | Other specified fluke infections                                                |
| B66.9 | Fluke infection, unspecified                                                    |
| B67*  | Echinococcosis                                                                  |
| B68   | Taeniasis                                                                       |
| B68.0 | <i>Taenia solium</i> taeniasis                                                  |
| B68.1 | <i>Taenia saginata</i> taeniasis                                                |
| B68.9 | Taeniasis, unspecified                                                          |
| B69   | Cysticercosis                                                                   |
| B69.0 | Cysticercosis of central nervous system                                         |
| B69.1 | Cysticercosis of eye                                                            |
| B69.8 | Cysticercosis of other sites                                                    |
| B69.9 | Cysticercosis, unspecified                                                      |
| B70   | Diphyllobothriasis and sparganosis                                              |
| B70.0 | Diphyllobothriasis                                                              |
| B70.1 | Sparganosis                                                                     |
| B71   | Other cestode infections                                                        |
| B71.0 | Hymenolepiasis                                                                  |
| B71.1 | Dipylidiasis                                                                    |
| B71.8 | Other specified cestode infections                                              |
| B71.9 | Cestode infection, unspecified                                                  |
| B72*  | Dracunculiasis                                                                  |
| B73*  | Onchocerciasis                                                                  |
| B74*  | Filariasis                                                                      |
| B75*  | Trichinellosis                                                                  |
| B76*  | Hookworm diseases                                                               |
| B77*  | Ascariasis                                                                      |
| B78*  | Strongyloidiasis                                                                |
| B79*  | Trichuriasis                                                                    |
| B80*  | Enterobiasis                                                                    |
| B81   | Other intestinal helminthiasis, not elsewhere classified                        |

|       |                                                                          |
|-------|--------------------------------------------------------------------------|
| B81.0 | Anisakiasis                                                              |
| B81.1 | Intestinal capillariasis                                                 |
| B81.2 | Trichostrongyliasis                                                      |
| B81.3 | Intestinal angiostrongyliasis                                            |
| B81.4 | Mixed intestinal helminthiasis                                           |
| B81.8 | Other specified intestinal helminthiasis                                 |
| B82   | Unspecified intestinal parasitism                                        |
| B82.0 | Intestinal helminthiasis, unspecified                                    |
| B82.9 | Intestinal parasitism, unspecified                                       |
| B83   | Other helminthiasis                                                      |
| B83.0 | Visceral larva migrans                                                   |
| B83.1 | Gnathostomiasis                                                          |
| B83.2 | Angiostrongyliasis due to <i>Parastrongylus cantonensis</i>              |
| B83.3 | Syngamiasis                                                              |
| B83.4 | Internal hirudiniasis                                                    |
| B83.8 | Other specified helminthiasis                                            |
| B83.9 | Helminthiasis, unspecified                                               |
| B85*  | Pediculosis and phthiriasis                                              |
| B86*  | Scabies                                                                  |
| B87*  | Myiasis                                                                  |
| B88   | Other infestations                                                       |
| B88.0 | Other acariasis                                                          |
| B88.1 | Tungiasis [sandflea infestation]                                         |
| B88.2 | Other arthropod infestations                                             |
| B88.3 | External hirudiniasis                                                    |
| B88.8 | Other specified infestations                                             |
| B88.9 | Infestation, unspecified                                                 |
| B89*  | Unspecified parasitic disease                                            |
| H06.1 | Parasitic infestation of orbit in diseases classified elsewhere          |
| H13.0 | Filarial infection of conjunctiva                                        |
| J17.3 | Pneumonia in parasitic diseases                                          |
| K23.1 | Megaesophagus in Chagas disease                                          |
| M63.1 | Myositis in protozoal and parasitic infections classified elsewhere      |
| O98.6 | Protozoal diseases complicating pregnancy, childbirth and the puerperium |
| P37.1 | Congenital toxoplasmosis                                                 |
| P37.3 | Congenital falciparum malaria                                            |
| P37.4 | Other congenital malaria                                                 |

#### **Fungal infections (mycoses)**

|       |                              |
|-------|------------------------------|
| B35*  | Dermatophytosis              |
| B36*  | Other superficial mycoses    |
| B37   | Candidiasis                  |
| B37.0 | Candidal stomatitis          |
| B37.1 | Pulmonary candidiasis        |
| B37.2 | Candidiasis of skin and nail |

|       |                                                 |
|-------|-------------------------------------------------|
| B37.3 | Candidiasis of vulva and vagina                 |
| B37.4 | Candidiasis of other urogenital sites           |
| B37.5 | Candidal meningitis                             |
| B37.6 | Candidal endocarditis                           |
| B37.7 | Candidal sepsis                                 |
| B37.8 | Candidiasis of other sites                      |
| B37.9 | Candidiasis, unspecified                        |
| B38   | Coccidioidomycosis                              |
| B38.0 | Acute pulmonary coccidioidomycosis              |
| B38.1 | Chronic pulmonary coccidioidomycosis            |
| B38.2 | Pulmonary coccidioidomycosis, unspecified       |
| B38.3 | Cutaneous coccidioidomycosis                    |
| B38.4 | Coccidioidomycosis meningitis                   |
| B38.7 | Disseminated coccidioidomycosis                 |
| B38.8 | Other forms of coccidioidomycosis               |
| B38.9 | Coccidioidomycosis, unspecified                 |
| B39   | Histoplasmosis                                  |
| B39.0 | Acute pulmonary histoplasmosis capsulati        |
| B39.1 | Chronic pulmonary histoplasmosis capsulati      |
| B39.2 | Pulmonary histoplasmosis capsulati, unspecified |
| B39.3 | Disseminated histoplasmosis capsulati           |
| B39.4 | Histoplasmosis capsulati, unspecified           |
| B39.5 | Histoplasmosis duboisii                         |
| B39.9 | Histoplasmosis, unspecified                     |
| B40   | Blastomycosis                                   |
| B40.0 | Acute pulmonary blastomycosis                   |
| B40.1 | Chronic pulmonary blastomycosis                 |
| B40.2 | Pulmonary blastomycosis, unspecified            |
| B40.3 | Cutaneous blastomycosis                         |
| B40.7 | Disseminated blastomycosis                      |
| B40.8 | Other forms of blastomycosis                    |
| B40.9 | Blastomycosis, unspecified                      |
| B41   | Paracoccidioidomycosis                          |
| B41.0 | Pulmonary paracoccidioidomycosis                |
| B41.7 | Disseminated paracoccidioidomycosis             |
| B41.8 | Other forms of paracoccidioidomycosis           |
| B41.9 | Paracoccidioidomycosis, unspecified             |
| B42   | Sporotrichosis                                  |
| B42.0 | Pulmonary sporotrichosis                        |
| B42.1 | Lymphocutaneous sporotrichosis                  |
| B42.7 | Disseminated sporotrichosis                     |
| B42.8 | Other forms of sporotrichosis                   |
| B42.9 | Sporotrichosis, unspecified                     |
| B43   | Chromomycosis and phaeomycotic abscess          |
| B43.0 | Cutaneous chromomycosis                         |
| B43.1 | Phaeomycotic brain abscess                      |
| B43.2 | Subcutaneous phaeomycotic abscess and cyst      |
| B43.8 | Other forms of chromomycosis                    |

|       |                                         |
|-------|-----------------------------------------|
| B43.9 | Chromomycosis, unspecified              |
| B44*  | Aspergillosis                           |
| B45   | Cryptococcosis                          |
| B45.0 | Pulmonary cryptococcosis                |
| B45.1 | Cerebral cryptococcosis                 |
| B45.2 | Cutaneous cryptococcosis                |
| B45.3 | Osseous cryptococcosis                  |
| B45.7 | Disseminated cryptococcosis             |
| B45.8 | Other forms of cryptococcosis           |
| B45.9 | Cryptococcosis, unspecified             |
| B46   | Zygomycosis                             |
| B46.0 | Pulmonary mucormycosis                  |
| B46.1 | Rhinocerebral mucormycosis              |
| B46.2 | Gastrointestinal mucormycosis           |
| B46.3 | Cutaneous mucormycosis                  |
| B46.4 | Disseminated mucormycosis               |
| B46.5 | Mucormycosis, unspecified               |
| B46.8 | Other zygomycoses                       |
| B46.9 | Zygomycosis, unspecified                |
| B47.0 | Eumycetoma                              |
| B48   | Other mycoses, not elsewhere classified |
| B48.0 | Lobomycosis                             |
| B48.1 | Rhinosporidiosis                        |
| B48.2 | Allescheriasis                          |
| B48.3 | Geotrichosis                            |
| B48.4 | Penicillois                             |
| B48.7 | Opportunistic mycoses                   |
| B48.8 | Other specified mycoses                 |
| B49*  | Unspecified mycosis                     |
| B59*  | Pneumocystosis                          |
| G02.1 | Meningitis in mycoses                   |
| H62.2 | Otitis externa in mycoses               |
| J17.2 | Pneumonia in mycoses                    |
| M01.6 | Arthritis in mycoses                    |
| P37.5 | Neonatal candidiasis                    |

\* Includes the underlying 4-digit codes

Abbreviations: ICD-10, International Classification of Diseases, 10th Revision.

ICD-10 disease names are from: World Health Organization. International Statistical Classification of Diseases and Related Health Problems 10th Revision [Internet]. ICD-10 Version:2016. [cited 2 Oct 2018]. Available from: <https://icd.who.int/browse10/2016/en>

**eTable 6. ICD-10 codes for infectious diseases with the corresponding ICD-8 and ICD-9 codes**

| ICD-10 code | ICD-10 description                                                | ICD-9 code | ICD-8 code |
|-------------|-------------------------------------------------------------------|------------|------------|
| A00         | Cholera                                                           | 0010A      | 00001      |
| A00         | Cholera                                                           | 0011A      | 00010      |
| A00         | Cholera                                                           | 0019X      | 00097      |
| A00         | Cholera                                                           |            | 00099      |
| A01*        | Typhoid and paratyphoid fevers                                    |            |            |
| A01.0       | Typhoid fever                                                     | 0020A      | 00197      |
| A01.0       | Typhoid fever                                                     |            | 00199      |
| A01.1       | Paratyphoid fever A                                               | 0021A      | 00200      |
| A01.2       | Paratyphoid fever B                                               | 0022A      | 00210      |
| A01.3       | Paratyphoid fever C                                               | 0023A      | 00220      |
| A01.4       | Paratyphoid fever, unspecified                                    | 0029X      | 0029       |
| A02         | Other salmonella infections                                       | 003        | 003        |
| A02.0       | Salmonella enteritis                                              | 0030A      |            |
| A02.1       | Salmonella sepsis                                                 | 0031A      |            |
| G01*A02.2   | Localized salmonella infections                                   | 0032A      |            |
| A02.2       | Localized salmonella infections                                   | 0032B      |            |
| A02.2       | Localized salmonella infections                                   | 0032C      |            |
| A02.2       | Localized salmonella infections                                   | 0032D      |            |
| A02.8       | Other specified salmonella infections                             | 0038X      |            |
| A02.9       | Salmonella infection, unspecified                                 | 0039X      |            |
| A03         | Shigellosis                                                       | 004        | 004        |
| A03.0       | Shigellosis due to <i>Shigella dysenteriae</i>                    | 0040A      | 00400      |
| A03.0       | Shigellosis due to <i>Shigella dysenteriae</i>                    |            | 00440      |
| A03.1       | Shigellosis due to <i>Shigella flexneri</i>                       | 0041A      | 00410      |
| A03.2       | Shigellosis due to <i>Shigella boydii</i>                         | 0042A      | 00420      |
| A03.3       | Shigellosis due to <i>Shigella sonnei</i>                         | 0043A      | 00430      |
| A03.8       | Other shigellosis                                                 | 0048X      | 00480      |
| A03.9       | Shigellosis, unspecified                                          | 0049X      | 00499      |
| A04         | Other bacterial intestinal infections                             |            |            |
| A04.0       | Enteropathogenic <i>Escherichia coli</i> infection                |            |            |
| A04.1       | Enterotoxigenic <i>Escherichia coli</i> infection                 | 0080A      |            |
| A04.2       | Enteroinvasive <i>Escherichia coli</i> infection                  | 0080B      |            |
| A04.3       | Enterohaemorrhagic <i>Escherichia coli</i> infection              |            |            |
| A04.4       | Other intestinal <i>Escherichia coli</i> infections               |            | 00800      |
| A04.5       | <i>Campylobacter enteritis</i>                                    | 0084E      |            |
| A04.6       | Enteritis due to <i>Yersinia enterocolitica</i>                   | 0084C      |            |
| A04.6       | Enteritis due to <i>Yersinia enterocolitica</i>                   | 0084D      |            |
| A04.7       | Enterocolitis due to <i>Clostridium difficile</i>                 | 0084F      |            |
| A04.8       | Other specified bacterial intestinal infections                   | 0081A      | 00810      |
| A04.8       | Other specified bacterial intestinal infections                   | 0082A      | 00820      |
| A04.8       | Other specified bacterial intestinal infections                   | 0083A      |            |
| A04.8       | Other specified bacterial intestinal infections                   | 0084A      |            |
| A04.8       | Other specified bacterial intestinal infections                   | 0084B      |            |
| A04.9       | Bacterial intestinal infection, unspecified                       | 0085X      | 00830      |
| A05         | Other bacterial foodborne intoxications, not elsewhere classified |            |            |

|       |                                                                                              |       |       |
|-------|----------------------------------------------------------------------------------------------|-------|-------|
| A05.0 | Foodborne staphylococcal intoxication                                                        | 0050A | 00500 |
| A05.1 | Botulism                                                                                     | 0051A | 00510 |
| A05.2 | Foodborne Clostridium perfringens [Clostridium welchii] intoxication                         | 0052A |       |
| A05.3 | Foodborne Vibrio parahaemolyticus intoxication                                               | 0054A |       |
| A05.4 | Foodborne Bacillus cereus intoxication                                                       |       |       |
| A05.8 | Other specified bacterial foodborne intoxications                                            | 0058X | 00580 |
| A05.9 | Bacterial foodborne intoxication, unspecified                                                | 0053A | 00520 |
| A05.9 | Bacterial foodborne intoxication, unspecified                                                | 0059X | 00599 |
| A05.9 | Bacterial foodborne intoxication, unspecified                                                |       | 00597 |
| A06   | Amoebiasis                                                                                   | 006   |       |
| A06.0 | Acute amoebic dysentery                                                                      | 0060A |       |
| A06.1 | Chronic intestinal amoebiasis                                                                | 0061A |       |
| A06.2 | Amoebic nondysenteric colitis                                                                | 0062A |       |
| A06.3 | Amoeboma of intestine                                                                        |       |       |
| A06.4 | Amoebic liver abscess                                                                        | 0063A | 00600 |
| A06.5 | Amoebic lung abscess                                                                         |       |       |
| A06.6 | Amoebic brain abscess                                                                        |       |       |
| A06.7 | Cutaneous amoebiasis                                                                         |       |       |
| A06.8 | Amoebic infection of other sites                                                             | 0068X |       |
| A06.9 | Amoebiasis, unspecified                                                                      | 0069X | 00690 |
| A06.9 | Amoebiasis, unspecified                                                                      |       | 00697 |
| A06.9 | Amoebiasis, unspecified                                                                      |       | 00699 |
| A07   | Other protozoal intestinal diseases                                                          | 007   | 007   |
| A07.8 | Other specified protozoal intestinal diseases                                                | 1365A |       |
| A08.0 | Rotaviral enteritis                                                                          | 0086A |       |
| A08.1 | Acute gastroenteropathy due to Norwalk agent                                                 | 0086B |       |
| A08.2 | Adenoviral enteritis                                                                         | 0086C |       |
| A08.3 | Other viral enteritis                                                                        |       | 00880 |
| A08.4 | Viral intestinal infection, unspecified                                                      | 0086X | 00898 |
| A08.5 | Other specified intestinal infections                                                        | 0088X |       |
| A09   | Other gastroenteritis and colitis of infectious and unspecified origin                       | 009   | 009   |
| A15*  | Respiratory tuberculosis, bacteriologically and histologically confirmed                     |       |       |
| A15.0 | Tuberculosis of lung, confirmed by sputum microscopy with or without culture                 | 0110A |       |
| A15.0 | Tuberculosis of lung, confirmed by sputum microscopy with or without culture                 | 0112A |       |
| A15.0 | Tuberculosis of lung, confirmed by sputum microscopy with or without culture                 | 0113A |       |
| A15.0 | Tuberculosis of lung, confirmed by sputum microscopy with or without culture                 | 0116A |       |
| A15.0 | Tuberculosis of lung, confirmed by sputum microscopy with or without culture                 | 0118A |       |
| A15.0 | Tuberculosis of lung, confirmed by sputum microscopy with or without culture                 | 0119A |       |
| A15.2 | Tuberculosis of lung, confirmed histologically                                               | 0110B |       |
| A15.2 | Tuberculosis of lung, confirmed histologically                                               | 0112B |       |
| A15.2 | Tuberculosis of lung, confirmed histologically                                               | 0113B |       |
| A15.2 | Tuberculosis of lung, confirmed histologically                                               | 0116B |       |
| A15.2 | Tuberculosis of lung, confirmed histologically                                               | 0118B |       |
| A15.2 | Tuberculosis of lung, confirmed histologically                                               | 0119B |       |
| A15.4 | Tuberculosis of intrathoracic lymph nodes, confirmed bacteriologically and histologically    | 0121A |       |
| A15.4 | Tuberculosis of intrathoracic lymph nodes, confirmed bacteriologically and histologically    | 0121B |       |
| A15.5 | Tuberculosis of larynx, trachea and bronchus, confirmed bacteriologically and histologically | 0122A |       |
| A15.5 | Tuberculosis of larynx, trachea and bronchus, confirmed bacteriologically and histologically | 0122B |       |
| A15.5 | Tuberculosis of larynx, trachea and bronchus, confirmed bacteriologically and histologically | 0123A |       |
| A15.5 | Tuberculosis of larynx, trachea and bronchus, confirmed bacteriologically and histologically | 0123B |       |



|       |                                                                                                               |       |       |
|-------|---------------------------------------------------------------------------------------------------------------|-------|-------|
| A15.6 | Tuberculous pleurisy, confirmed bacteriologically and histologically                                          | 0120A |       |
| A15.6 | Tuberculous pleurisy, confirmed bacteriologically and histologically                                          | 0120B |       |
| A15.7 | Primary respiratory tuberculosis, confirmed bacteriologically and histologically                              | 0101A |       |
| A15.7 | Primary respiratory tuberculosis, confirmed bacteriologically and histologically                              | 0101B |       |
| A15.8 | Other respiratory tuberculosis, confirmed bacteriologically and histologically                                | 0128A |       |
| A15.8 | Other respiratory tuberculosis, confirmed bacteriologically and histologically                                | 0128B |       |
| A16*  | Respiratory tuberculosis, not confirmed bacteriologically or histologically                                   |       |       |
| A16.2 | Tuberculosis of lung, without mention of bacteriological or histological confirmation                         | 0110X | 01099 |
| A16.2 | Tuberculosis of lung, without mention of bacteriological or histological confirmation                         | 0112X | 01101 |
| A16.2 | Tuberculosis of lung, without mention of bacteriological or histological confirmation                         | 0113X | 01102 |
| A16.2 | Tuberculosis of lung, without mention of bacteriological or histological confirmation                         | 0116X | 01103 |
| A16.2 | Tuberculosis of lung, without mention of bacteriological or histological confirmation                         | 0118X | 01104 |
| A16.2 | Tuberculosis of lung, without mention of bacteriological or histological confirmation                         | 0119X | 01105 |
| A16.2 | Tuberculosis of lung, without mention of bacteriological or histological confirmation                         |       | 01106 |
| A16.2 | Tuberculosis of lung, without mention of bacteriological or histological confirmation                         |       | 01107 |
| A16.3 | Tuberculosis of intrathoracic lymph nodes, without mention of bacteriological or histological confirmation    | 0121X | 01292 |
| A16.4 | Tuberculosis of larynx, trachea and bronchus, without mention of bacteriological or histological confirmation | 0122X | 01230 |
| A16.4 | Tuberculosis of larynx, trachea and bronchus, without mention of bacteriological or histological confirmation | 0123X | 01290 |
| A16.5 | Tuberculous pleurisy, without mention of bacteriological or histological confirmation                         | 0120X | 01210 |
| A16.5 | Tuberculous pleurisy, without mention of bacteriological or histological confirmation                         |       | 01211 |
| A16.7 | Primary respiratory tuberculosis without mention of bacteriological or histological confirmation              | 0100  | 01200 |
| A16.7 | Primary respiratory tuberculosis without mention of bacteriological or histological confirmation              | 0101X |       |
| A16.8 | Other respiratory tuberculosis, without mention of bacteriological or histological confirmation               | 0128X | 01291 |
| A16.8 | Other respiratory tuberculosis, without mention of bacteriological or histological confirmation               |       | 01296 |
| A16.9 | Respiratory tuberculosis unspecified, without mention of bacteriological or histological confirmation         | 0108A |       |
| A16.9 | Respiratory tuberculosis unspecified, without mention of bacteriological or histological confirmation         | 0108B |       |
| A16.9 | Respiratory tuberculosis unspecified, without mention of bacteriological or histological confirmation         | 0108X | 01212 |
| A16.9 | Respiratory tuberculosis unspecified, without mention of bacteriological or histological confirmation         | 0109A |       |
| A16.9 | Respiratory tuberculosis unspecified, without mention of bacteriological or histological confirmation         | 0109B |       |
| A16.9 | Respiratory tuberculosis unspecified, without mention of bacteriological or histological confirmation         | 0109X | 01297 |
| A16.9 | Respiratory tuberculosis unspecified, without mention of bacteriological or histological confirmation         |       | 01109 |
| A16.9 | Respiratory tuberculosis unspecified, without mention of bacteriological or histological confirmation         |       | 01797 |
| A17   | Tuberculosis of nervous system                                                                                |       |       |
| A17.0 | Tuberculous meningitis                                                                                        | 0130  | 01300 |
| A17.1 | Meningeal tuberculoma                                                                                         | 0131  |       |
| A17.8 | Other tuberculosis of nervous system                                                                          | 0132  | 01390 |
| A17.8 | Other tuberculosis of nervous system                                                                          | 0133  |       |
| A17.8 | Other tuberculosis of nervous system                                                                          | 0138  |       |
| A17.9 | Tuberculosis of nervous system, unspecified                                                                   | 0139  | 01397 |
| A17.9 | Tuberculosis of nervous system, unspecified                                                                   |       | 01399 |
| A18*  | Tuberculosis of other organs                                                                                  |       |       |
| A18.0 | Tuberculosis of bones and joints                                                                              | 015   | 015   |
| A18.1 | Tuberculosis of genitourinary system                                                                          | 016   | 016   |
| A18.2 | Tuberculous peripheral lymphadenopathy                                                                        | 0172A | 01710 |
| A18.2 | Tuberculous peripheral lymphadenopathy                                                                        |       | 01718 |
| A18.2 | Tuberculous peripheral lymphadenopathy                                                                        |       | 01719 |
| A18.3 | Tuberculosis of intestines, peritoneum and mesenteric glands                                                  | 014   | 014   |
| A18.4 | Tuberculosis of skin and subcutaneous tissue                                                                  | 0170  | 0170  |
| A18.4 | Tuberculosis of skin and subcutaneous tissue                                                                  | 0171A |       |

|       |                                               |       |       |
|-------|-----------------------------------------------|-------|-------|
| A18.4 | Tuberculosis of skin and subcutaneous tissue  | 0171B |       |
| A18.4 | Tuberculosis of skin and subcutaneous tissue  | 0171C |       |
| A18.4 | Tuberculosis of skin and subcutaneous tissue  | 0171D |       |
| A18.5 | Tuberculosis of eye                           | 0173A | 01720 |
| A18.5 | Tuberculosis of eye                           |       | 01721 |
| A18.5 | Tuberculosis of eye                           |       | 01722 |
| A18.5 | Tuberculosis of eye                           |       | 01723 |
| A18.5 | Tuberculosis of eye                           |       | 01729 |
| A18.6 | Tuberculosis of ear                           | 0174A | 01732 |
| A18.6 | Tuberculosis of ear                           |       | 01739 |
| A18.7 | Tuberculosis of adrenal glands                | 0176A |       |
| A18.8 | Tuberculosis of other specified organs        | 0175A | 01791 |
| A18.8 | Tuberculosis of other specified organs        | 0177A | 01793 |
| A18.8 | Tuberculosis of other specified organs        | 0178A | 01794 |
| A18.8 | Tuberculosis of other specified organs        | 0178X | 01795 |
| A18.8 | Tuberculosis of other specified organs        |       | 01796 |
| A19*  | Miliary tuberculosis                          |       |       |
| A19.2 | Acute miliary tuberculosis, unspecified       | 0180  | 01800 |
| A19.2 | Acute miliary tuberculosis, unspecified       |       | 01810 |
| A19.9 | Miliary tuberculosis, unspecified             | 0189  | 01898 |
| A20   | Plague                                        | 020   | 020   |
| A20.0 | Bubonic plague                                | 0200A | 02000 |
| A20.1 | Cellulocutaneous plague                       | 0201A |       |
| A20.2 | Pneumonic plague                              | 0203A | 02010 |
| A20.2 | Pneumonic plague                              | 0204A |       |
| A20.2 | Pneumonic plague                              | 0205A |       |
| A20.3 | Plague meningitis                             |       |       |
| A20.7 | Septicaemic plague                            | 0202A |       |
| A20.8 | Other forms of plague                         | 0208X |       |
| A20.9 | Plague, unspecified                           | 0209X | 02099 |
| A21   | Tularaemia                                    | 021   | 021   |
| A21.0 | Ulceroglandular tularaemia                    | 0210A | 02100 |
| A21.1 | Oculoglandular tularaemia                     | 0213A | 02101 |
| A21.2 | Pulmonary tularaemia                          | 0212A |       |
| A21.3 | Gastrointestinal tularaemia                   | 0211A |       |
| A21.7 | Generalized tularaemia                        |       | 02102 |
| A21.8 | Other forms of tularaemia                     | 0218X | 02106 |
| A21.8 | Other forms of tularaemia                     |       | 02107 |
| A21.9 | Tularaemia, unspecified                       | 0219X | 02109 |
| A22   | Anthrax                                       | 022   | 022   |
| A22.0 | Cutaneous anthrax                             | 0220A |       |
| A22.1 | Pulmonary anthrax                             | 0221A |       |
| A22.2 | Gastrointestinal anthrax                      | 0222A |       |
| A22.7 | Anthrax sepsis                                | 0223A |       |
| A22.8 | Other forms of anthrax                        | 0228X |       |
| A22.9 | Anthrax, unspecified                          | 0229X |       |
| A23   | Brucellosis                                   | 023   | 023   |
| A23.0 | Brucellosis due to <i>Brucella melitensis</i> | 0230A | 02300 |
| A23.1 | Brucellosis due to <i>Brucella abortus</i>    | 0231A | 02310 |
| A23.2 | Brucellosis due to <i>Brucella suis</i>       | 0232A | 02320 |

|       |                                                                       |       |       |
|-------|-----------------------------------------------------------------------|-------|-------|
| A23.3 | Brucellosis due to <i>Brucella canis</i>                              | 0233A |       |
| A23.8 | Other brucellosis                                                     | 0238X |       |
| A23.9 | Brucellosis, unspecified                                              | 0239X | 02397 |
| A23.9 | Brucellosis, unspecified                                              |       | 02399 |
| A24   | Glanders and melioidosis                                              |       |       |
| A24.0 | Glanders                                                              | 024   | 024   |
| A24.1 | Acute and fulminating melioidosis                                     |       |       |
| A24.2 | Subacute and chronic melioidosis                                      |       |       |
| A24.3 | Other melioidosis                                                     |       |       |
| A24.4 | Melioidosis, unspecified                                              | 025   | 025   |
| A25   | Rat-bite fevers                                                       |       |       |
| A25.0 | Spirillosis                                                           |       | 02600 |
| A25.1 | Streptobacillosis                                                     |       | 02610 |
| A25.9 | Rat-bite fever, unspecified                                           | 026   | 02601 |
| A25.9 | Rat-bite fever, unspecified                                           |       | 02699 |
| A26   | Erysipeloid                                                           | 0271A | 02710 |
| A26.0 | Cutaneous erysipeloid                                                 |       |       |
| A26.7 | Erysipelothrix sepsis                                                 |       |       |
| A26.8 | Other forms of erysipeloid                                            |       |       |
| A26.9 | Erysipeloid, unspecified                                              |       |       |
| A27   | Leptospirosis                                                         | 100   | 100   |
| A28   | Other zoonotic bacterial diseases, not elsewhere classified           |       |       |
| A28.0 | Pasteurellosis                                                        | 0272A |       |
| A28.1 | Cat-scratch disease                                                   | 0783A | 07930 |
| A28.2 | Extraintestinal yersiniosis                                           |       | 0391  |
| A28.8 | Other specified zoonotic bacterial diseases, not elsewhere classified | 0278X |       |
| A28.9 | Zoonotic bacterial disease, unspecified                               | 0279X | 02798 |
| A30   | Leprosy [Hansen disease]                                              | 030   | 030   |
| A31   | Infection due to other mycobacteria                                   | 031   | 031   |
| A32   | Listeriosis                                                           |       |       |
| A32.0 | Cutaneous listeriosis                                                 |       |       |
| A32.1 | Listerial meningitis and meningoencephalitis                          | 0270A | 02701 |
| A32.7 | Listerial sepsis                                                      |       |       |
| A32.8 | Other forms of listeriosis                                            | 0270X | 02708 |
| A32.9 | Listeriosis, unspecified                                              |       | 02709 |
| A33   | Tetanus neonatorum                                                    | 7713A |       |
| A34*  | Obstetrical tetanus                                                   |       |       |
| A35   | Other tetanus                                                         | 037   | 037   |
| A36   | Diphtheria                                                            | 032   | 032   |
| A37   | Whooping cough                                                        | 033   | 033   |
| A38   | Scarlet fever                                                         | 0341  | 0341  |
| A39   | Meningococcal infection                                               | 036   | 036   |
| A39.0 | Meningococcal meningitis                                              | 0360A | 03600 |
| A39.1 | Waterhouse-Friderichsen syndrome                                      | 0363A | 03611 |
| A39.2 | Acute meningococcaemia                                                |       |       |
| A39.3 | Chronic meningococcaemia                                              |       | 03612 |
| A39.4 | Meningococcaemia, unspecified                                         | 0362A | 03610 |
| A39.5 | Meningococcal heart disease                                           | 0364A |       |
| A39.8 | Other meningococcal infections                                        | 0361A | 03680 |
| A39.8 | Other meningococcal infections                                        | 0361B |       |

|       |                                                   |       |       |
|-------|---------------------------------------------------|-------|-------|
| A39.8 | Other meningococcal infections                    | 0368A |       |
| A39.8 | Other meningococcal infections                    | 0368X |       |
| A39.9 | Meningococcal infection, unspecified              | 0369X | 03697 |
| A40   | Streptococcal sepsis                              |       |       |
| A40.0 | Sepsis due to streptococcus, group A              |       |       |
| A40.1 | Sepsis due to streptococcus, group B              |       |       |
| A40.2 | Sepsis due to streptococcus, group D              |       |       |
| A40.3 | Sepsis due to Streptococcus pneumoniae            | 0382A | 03820 |
| A40.8 | Other streptococcal sepsis                        | 0380B |       |
| A40.8 | Other streptococcal sepsis                        | 0380X |       |
| A40.9 | Streptococcal sepsis, unspecified                 | 0380A | 03800 |
| A41   | Other sepsis                                      |       |       |
| A41.0 | Sepsis due to Staphylococcus aureus               | 0381A |       |
| A41.1 | Sepsis due to other specified staphylococcus      | 0381B |       |
| A41.2 | Sepsis due to unspecified staphylococcus          |       | 03810 |
| A41.3 | Sepsis due to Haemophilus influenzae              | 0384A |       |
| A41.4 | Sepsis due to anaerobes                           | 0383A |       |
| A41.5 | Sepsis due to other Gram-negative organisms       | 0384B | 03880 |
| A41.5 | Sepsis due to other Gram-negative organisms       | 0384C |       |
| A41.5 | Sepsis due to other Gram-negative organisms       | 0384X |       |
| A41.8 | Other specified sepsis                            | 0380C | 03888 |
| A41.8 | Other specified sepsis                            | 0388X |       |
| A41.9 | Sepsis, unspecified                               |       | 0389  |
| A42   | Actinomycosis                                     | 039   |       |
| A42   | Actinomycosis                                     | 0402A |       |
| A42.0 | Pulmonary actinomycosis                           | 0391A |       |
| A42.1 | Abdominal actinomycosis                           | 0392A |       |
| A42.2 | Cervicofacial actinomycosis                       | 0393A |       |
| A42.7 | Actinomycotic sepsis                              |       |       |
| A42.8 | Other forms of actinomycosis                      | 0390A |       |
| A42.9 | Actinomycosis, unspecified                        |       | 11399 |
| A43   | Nocardiosis                                       |       |       |
| A43.0 | Pulmonary nocardiosis                             |       |       |
| A43.1 | Cutaneous nocardiosis                             |       |       |
| A43.8 | Other forms of nocardiosis                        |       |       |
| A44   | Bartonellosis                                     |       |       |
| A44.0 | Systemic bartonellosis                            |       |       |
| A44.1 | Cutaneous and mucocutaneous bartonellosis         |       |       |
| A44.8 | Other forms of bartonellosis                      |       |       |
| A44.9 | Bartonellosis, unspecified                        | 0880A | 08900 |
| A46   | Erysipelas                                        | 035   | 035   |
| A48.0 | Gas gangrene                                      | 0400A | 0390A |
| A48.1 | Legionnaires disease                              |       |       |
| A48.2 | Nonpneumonic Legionnaires disease [Pontiac fever] |       |       |
| A48.3 | Toxic shock syndrome                              |       |       |
| A48.4 | Brazilian purpuric fever                          |       |       |
| A48.8 | Other specified bacterial diseases                | 0401A | 03910 |
| A48.8 | Other specified bacterial diseases                | 0403A |       |
| A48.8 | Other specified bacterial diseases                | 0408X |       |
| A49   | Bacterial infection of unspecified site           |       |       |

|       |                                                        |       |       |
|-------|--------------------------------------------------------|-------|-------|
| A49.0 | Staphylococcal infection, unspecified site             |       | 03990 |
| A49.1 | Streptococcal infection, unspecified site              |       |       |
| A49.2 | Haemophilus influenzae infection, unspecified site     |       |       |
| A49.3 | Mycoplasma infection, unspecified site                 |       |       |
| A49.8 | Other bacterial infections of unspecified site         | 0418X | 03991 |
| A49.8 | Other bacterial infections of unspecified site         |       | 03992 |
| A49.8 | Other bacterial infections of unspecified site         |       | 03993 |
| A49.8 | Other bacterial infections of unspecified site         |       | 03998 |
| A49.9 | Bacterial infection, unspecified                       | 0419X |       |
| A50   | Congenital syphilis                                    | 090   |       |
| A50.0 | Early congenital syphilis, symptomatic                 | 0900A | 09000 |
| A50.1 | Early congenital syphilis, latent                      | 0901A | 09010 |
| A50.2 | Early congenital syphilis, unspecified                 | 0902A | 09020 |
| A50.3 | Late congenital syphilitic oculopathy                  | 0903A | 09030 |
| A50.4 | Late congenital neurosyphilis [juvenile neurosyphilis] | 0904A | 09040 |
| A50.5 | Other late congenital syphilis, symptomatic            | 0905A | 09050 |
| A50.6 | Late congenital syphilis, latent                       | 0906A | 09060 |
| A50.7 | Late congenital syphilis, unspecified                  | 0907A | 09070 |
| A50.9 | Congenital syphilis, unspecified                       | 0909X | 09097 |
| A50.9 | Congenital syphilis, unspecified                       |       | 09099 |
| A51   | Early syphilis                                         |       |       |
| A51.0 | Primary genital syphilis                               | 0910A | 09100 |
| A51.1 | Primary anal syphilis                                  | 0911A |       |
| A51.2 | Primary syphilis of other sites                        | 0912A |       |
| A51.3 | Secondary syphilis of skin and mucous membranes        | 0913A | 09120 |
| A51.4 | Other secondary syphilis                               | 0914A | 09188 |
| A51.4 | Other secondary syphilis                               | 0915A |       |
| A51.5 | Early syphilis, latent                                 | 092   | 092   |
| A51.9 | Early syphilis, unspecified                            | 0917A | 09130 |
| A51.9 | Early syphilis, unspecified                            | 0918X | 09197 |
| A51.9 | Early syphilis, unspecified                            | 0919X | 09199 |
| A52   | Late syphilis                                          |       |       |
| A52.0 | Cardiovascular syphilis                                | 093   | 093   |
| A52.1 | Symptomatic neurosyphilis                              | 0940A | 09400 |
| A52.1 | Symptomatic neurosyphilis                              | 0941A | 09401 |
| A52.1 | Symptomatic neurosyphilis                              | 0942A | 09402 |
| A52.1 | Symptomatic neurosyphilis                              | 0948X | 09408 |
| A52.1 | Symptomatic neurosyphilis                              |       | 09409 |
| A52.1 | Symptomatic neurosyphilis                              |       | 09410 |
| A52.1 | Symptomatic neurosyphilis                              |       | 09490 |
| A52.1 | Symptomatic neurosyphilis                              |       | 09498 |
| A52.2 | Asymptomatic neurosyphilis                             | 0943A |       |
| A52.3 | Neurosyphilis, unspecified                             | 0949X | 09491 |
| A52.3 | Neurosyphilis, unspecified                             |       | 09499 |
| A52.7 | Other symptomatic late syphilis                        | 095   | 095   |
| A52.8 | Late syphilis, latent                                  | 096   | 096   |
| A52.9 | Late syphilis, unspecified                             | 0970A |       |
| A53   | Other and unspecified syphilis                         | 097   | 097   |
| A53.0 | Latent syphilis, unspecified as early or late          | 0971A |       |
| A53.9 | Syphilis, unspecified                                  | 0979X |       |

|       |                                                                                                   |       |       |
|-------|---------------------------------------------------------------------------------------------------|-------|-------|
| A54   | Gonococcal infection                                                                              | 098   | 098   |
| A54.0 | Gonococcal infection of lower genitourinary tract without periurethral or accessory gland abscess |       | 09800 |
| A54.1 | Gonococcal infection of lower genitourinary tract with periurethral and accessory gland abscess   |       | 09802 |
| A54.1 | Gonococcal infection of lower genitourinary tract with periurethral and accessory gland abscess   |       | 09812 |
| A54.2 | Gonococcal pelviperitonitis and other gonococcal genitourinary infections                         | 0981A | 09801 |
| A54.2 | Gonococcal pelviperitonitis and other gonococcal genitourinary infections                         | 0983A | 09803 |
| A54.2 | Gonococcal pelviperitonitis and other gonococcal genitourinary infections                         |       | 09804 |
| A54.2 | Gonococcal pelviperitonitis and other gonococcal genitourinary infections                         |       | 09805 |
| A54.2 | Gonococcal pelviperitonitis and other gonococcal genitourinary infections                         |       | 09811 |
| A54.2 | Gonococcal pelviperitonitis and other gonococcal genitourinary infections                         |       | 09813 |
| A54.2 | Gonococcal pelviperitonitis and other gonococcal genitourinary infections                         |       | 09814 |
| A54.2 | Gonococcal pelviperitonitis and other gonococcal genitourinary infections                         |       | 09815 |
| A54.3 | Gonococcal infection of eye                                                                       | 0984A |       |
| A54.3 | Gonococcal infection of eye                                                                       |       | 09820 |
| A54.3 | Gonococcal infection of eye                                                                       |       | 09821 |
| A54.3 | Gonococcal infection of eye                                                                       |       | 09828 |
| A54.4 | Gonococcal infection of musculoskeletal system                                                    | 0985A |       |
| A54.4 | Gonococcal infection of musculoskeletal system                                                    |       | 09839 |
| A54.5 | Gonococcal pharyngitis                                                                            | 0986A |       |
| A54.6 | Gonococcal infection of anus and rectum                                                           | 0987A |       |
| A54.8 | Other gonococcal infections                                                                       | 0988A |       |
| A54.8 | Other gonococcal infections                                                                       | 0988B |       |
| A54.8 | Other gonococcal infections                                                                       | 0988X |       |
| A54.9 | Gonococcal infection, unspecified                                                                 | 0980A | 09806 |
| A54.9 | Gonococcal infection, unspecified                                                                 | 0982A | 09808 |
| A54.9 | Gonococcal infection, unspecified                                                                 |       | 09809 |
| A54.9 | Gonococcal infection, unspecified                                                                 |       | 09810 |
| A54.9 | Gonococcal infection, unspecified                                                                 |       | 09816 |
| A54.9 | Gonococcal infection, unspecified                                                                 |       | 09818 |
| A54.9 | Gonococcal infection, unspecified                                                                 |       | 09888 |
| A54.9 | Gonococcal infection, unspecified                                                                 |       | 09899 |
| A55   | Chlamydial lymphogranuloma (venereum)                                                             | 0991A | 09919 |
| A56.0 | Chlamydial infection of lower genitourinary tract                                                 | 0769A |       |
| A56.1 | Chlamydial infection of pelviperitoneum and other genitourinary organs                            | 0769C |       |
| A56.2 | Chlamydial infection of genitourinary tract, unspecified                                          |       |       |
| A56.3 | Chlamydial infection of anus and rectum                                                           | 0769B |       |
| A56.4 | Chlamydial infection of pharynx                                                                   | 0769E |       |
| A56.8 | Sexually transmitted chlamydial infection of other sites                                          |       |       |
| A57   | Chancroid                                                                                         | 0990A | 09909 |
| A58   | Granuloma inguinale                                                                               | 0992A | 09929 |
| A59*  | Trichomoniasis                                                                                    |       |       |
| A59.0 | Urogenital trichomoniasis                                                                         | 1310A | 13197 |
| A59.0 | Urogenital trichomoniasis                                                                         |       | 13199 |
| A59.8 | Trichomoniasis of other sites                                                                     | 1318X |       |
| A59.9 | Trichomoniasis, unspecified                                                                       | 1319X |       |
| A60*  | Anogenital herpesviral [herpes simplex] infection                                                 |       |       |
| A60.0 | Herpesviral infection of genitalia and urogenital tract                                           | 0541  | 05402 |
| A63.0 | Anogenital (venereal) warts                                                                       | 0781C |       |
| A63.0 | Anogenital (venereal) warts                                                                       |       | 09992 |
| A63.8 | Other specified predominantly sexually transmitted diseases                                       | 0998X | 09996 |

|       |                                                                |       |       |
|-------|----------------------------------------------------------------|-------|-------|
| A64   | Unspecified sexually transmitted disease                       | 0994A | 09990 |
| A64   | Unspecified sexually transmitted disease                       | 0999X | 09991 |
| A64   | Unspecified sexually transmitted disease                       |       | 09997 |
| A64   | Unspecified sexually transmitted disease                       |       | 09999 |
| A65   | Nonvenereal syphilis                                           | 1040A | 10400 |
| A66   | Yaws                                                           | 102   | 10299 |
| A67   | Pinta [carate]                                                 | 103   | 10399 |
| A68   | Relapsing fevers                                               | 0870A | 08899 |
| A68   | Relapsing fevers                                               | 0871A |       |
| A68   | Relapsing fevers                                               | 0879X |       |
| A69   | Other spirochaetal infections                                  |       |       |
| A69.0 | Necrotizing ulcerative stomatitis                              |       |       |
| A69.1 | Other Vincent infections                                       | 101   | 10199 |
| A69.1 | Other Vincent infections                                       | 1010A |       |
| A69.2 | Lyme disease                                                   | 1048A |       |
| A69.2 | Lyme disease                                                   | 1048B |       |
| A69.8 | Other specified spirochaetal infections                        | 1048X | 10498 |
| A69.9 | Spirochaetal infection, unspecified                            | 1049X |       |
| A70   | Chlamydia psittaci infection                                   | 073   | 073   |
| A71   | Trachoma                                                       | 0760A | 07699 |
| A74.0 | Chlamydial conjunctivitis                                      |       |       |
| A74.8 | Other chlamydial diseases                                      | 0769D |       |
| A74.9 | Chlamydial infection, unspecified                              | 0769X |       |
| A75   | Typhus fever                                                   |       |       |
| A75.0 | Epidemic louse-borne typhus fever due to Rickettsia prowazekii | 080   | 080   |
| A75.1 | Recrudescence typhus [Brill disease]                           | 0811A | 08110 |
| A75.2 | Typhus fever due to Rickettsia typhi                           | 0810A | 08100 |
| A75.3 | Typhus fever due to Rickettsia tsutsugamushi                   | 0812A |       |
| A75.9 | Typhus fever, unspecified                                      | 0819X | 08197 |
| A75.9 | Typhus fever, unspecified                                      |       | 08199 |
| A77   | Spotted fever [tick-borne rickettsioses]                       |       |       |
| A77.0 | Spotted fever due to Rickettsia rickettsii                     | 0820A | 08200 |
| A77.1 | Spotted fever due to Rickettsia conorii                        | 0821A | 08210 |
| A77.2 | Spotted fever due to Rickettsia sibirica                       |       |       |
| A77.3 | Spotted fever due to Rickettsia australis                      |       |       |
| A77.8 | Other spotted fevers                                           | 0828X |       |
| A77.9 | Spotted fever, unspecified                                     | 0829X | 08229 |
| A77.9 | Spotted fever, unspecified                                     |       | 08220 |
| A78   | Q fever                                                        | 0830A | 08310 |
| A79   | Other rickettsioses                                            |       |       |
| A79.0 | Trench fever                                                   | 0831A | 08320 |
| A79.1 | Rickettsialpox due to Rickettsia akari                         | 0832A | 08300 |
| A79.8 | Other specified rickettsioses                                  | 0838X | 08388 |
| A79.9 | Rickettsiosis, unspecified                                     | 0839X | 08120 |
| A79.9 | Rickettsiosis, unspecified                                     |       | 08397 |
| A79.9 | Rickettsiosis, unspecified                                     |       | 08399 |
| A80   | Acute poliomyelitis                                            | 0450A | 04199 |
| A80   | Acute poliomyelitis                                            | 0450B |       |
| A80   | Acute poliomyelitis                                            | 0450C |       |
| A80   | Acute poliomyelitis                                            | 0450X | 04001 |

|       |                                                                            |       |       |
|-------|----------------------------------------------------------------------------|-------|-------|
| A80   | Acute poliomyelitis                                                        | 0451A |       |
| A80   | Acute poliomyelitis                                                        | 0451B |       |
| A80   | Acute poliomyelitis                                                        | 0451C |       |
| A80   | Acute poliomyelitis                                                        | 0451X | 04000 |
| A80   | Acute poliomyelitis                                                        | 0452A |       |
| A80   | Acute poliomyelitis                                                        | 0452B |       |
| A80   | Acute poliomyelitis                                                        | 0452C |       |
| A80   | Acute poliomyelitis                                                        | 0452X | 04299 |
| A80   | Acute poliomyelitis                                                        | 0459A | 04397 |
| A80   | Acute poliomyelitis                                                        | 0459B | 04399 |
| A80   | Acute poliomyelitis                                                        | 0459C |       |
| A80   | Acute poliomyelitis                                                        | 0459X | 04007 |
| A81.0 | Creutzfeldt-Jakob disease                                                  | 0461A |       |
| A81.1 | Subacute sclerosing panencephalitis                                        | 0462A |       |
| A81.1 | Subacute sclerosing panencephalitis                                        |       | 32301 |
| A81.2 | Progressive multifocal leukoencephalopathy                                 | 0463A |       |
| A81.8 | Other atypical virus infections of central nervous system                  | 0460A |       |
| A81.8 | Other atypical virus infections of central nervous system                  | 0468X |       |
| A81.9 | Atypical virus infection of central nervous system, unspecified            | 0469X |       |
| A83*  | Mosquito-borne viral encephalitis                                          |       |       |
| A83.0 | Japanese encephalitis                                                      | 0620A | 06200 |
| A83.1 | Western equine encephalitis                                                | 0621A | 06210 |
| A83.2 | Eastern equine encephalitis                                                | 0622A | 06220 |
| A83.3 | St Louis encephalitis                                                      | 0623A | 06230 |
| A83.4 | Australian encephalitis                                                    | 0624A | 06240 |
| A83.5 | California encephalitis                                                    | 0625A |       |
| A83.8 | Other mosquito-borne viral encephalitis                                    | 0625B | 06298 |
| A83.8 | Other mosquito-borne viral encephalitis                                    | 0628X |       |
| A83.9 | Mosquito-borne viral encephalitis, unspecified                             | 0629X | 06297 |
| A83.9 | Mosquito-borne viral encephalitis, unspecified                             |       | 06299 |
| A84   | Tick-borne viral encephalitis                                              | 063   | 063   |
| A85*  | Other viral encephalitis, not elsewhere classified                         |       |       |
| A85.0 | Enteroviral encephalitis                                                   | 0480A | 04699 |
| A85.1 | Adenoviral encephalitis                                                    | 0491A |       |
| A85.2 | Arthropod-borne viral encephalitis, unspecified                            | 0640A | 06499 |
| A85.8 | Other specified viral encephalitis                                         |       | 06590 |
| A86   | Unspecified viral encephalitis                                             |       | 06599 |
| A87*  | Viral meningitis                                                           |       |       |
| A87.0 | Enteroviral meningitis                                                     | 047   | 04500 |
| A87.0 | Enteroviral meningitis                                                     |       | 04510 |
| A87.0 | Enteroviral meningitis                                                     |       | 04597 |
| A87.0 | Enteroviral meningitis                                                     |       | 04599 |
| A87.2 | Lymphocytic choriomeningitis                                               | 0490A |       |
| A87.2 | Lymphocytic choriomeningitis                                               |       | 07920 |
| A88*  | Other viral infections of central nervous system, not elsewhere classified |       |       |
| A88.8 | Other specified viral infections of central nervous system                 | 0498X |       |
| A89   | Unspecified viral infection of central nervous system                      | 0499X |       |
| A90   | Dengue fever [classical dengue]                                            | 061   | 061   |
| A91*  | Dengue haemorrhagic fever                                                  |       |       |
| A92   | Other mosquito-borne viral fevers                                          |       |       |



|       |                                                              |       |       |
|-------|--------------------------------------------------------------|-------|-------|
| A92.0 | Chikungunya virus disease                                    |       |       |
| A92.1 | O'nyong-nyong fever                                          |       |       |
| A92.2 | Venezuelan equine fever                                      | 0662A |       |
| A92.3 | West Nile virus infection                                    |       |       |
| A92.4 | Rift Valley fever                                            |       |       |
| A92.8 | Other specified mosquito-borne viral fevers                  | 0663A | 06820 |
| A92.8 | Other specified mosquito-borne viral fevers                  | 0663B |       |
| A92.9 | Mosquito-borne viral fever, unspecified                      |       |       |
| A93   | Other arthropod-borne viral fevers, not elsewhere classified |       |       |
| A93.0 | Oropouche virus disease                                      |       |       |
| A93.1 | Sandfly fever                                                |       | 06800 |
| A93.2 | Colorado tick fever                                          |       |       |
| A93.8 | Other specified arthropod-borne viral fevers                 | 0661A | 06810 |
| A93.8 | Other specified arthropod-borne viral fevers                 | 0668X | 06898 |
| A94   | Unspecified arthropod-borne viral fever                      | 0669X |       |
| A95   | Yellow fever                                                 | 060   | 060   |
| A96*  | Arenaviral haemorrhagic fever                                |       |       |
| A96.9 | Arenaviral haemorrhagic fever, unspecified                   | 0787A |       |
| A97*  | Dengue                                                       |       |       |
| A98   | Other viral haemorrhagic fevers, not elsewhere classified    |       |       |
| A98.0 | Crimean-Congo haemorrhagic fever                             | 0650A | 06700 |
| A98.1 | Omsk haemorrhagic fever                                      | 0651A | 06710 |
| A98.2 | Kyasanur Forest disease                                      | 0652A | 06720 |
| A98.3 | Marburg virus disease                                        |       |       |
| A98.4 | Ebola virus disease                                          |       |       |
| A98.5 | Haemorrhagic fever with renal syndrome                       | 0786A | 06750 |
| A98.8 | Other specified viral haemorrhagic fevers                    | 0653A | 06738 |
| A98.8 | Other specified viral haemorrhagic fevers                    | 0654A | 06740 |
| A98.8 | Other specified viral haemorrhagic fevers                    | 0658X |       |
| A99   | Unspecified viral haemorrhagic fever                         | 0659X | 06790 |
| A99   | Unspecified viral haemorrhagic fever                         | 0787X |       |
| B00   | Herpesviral [herpes simplex] infections                      |       |       |
| B00.0 | Eczema herpeticum                                            | 0540A | 05403 |
| B00.1 | Herpesviral vesicular dermatitis                             | 0547A |       |
| B00.1 | Herpesviral vesicular dermatitis                             | 0549X | 05400 |
| B00.2 | Herpesviral gingivostomatitis and pharyngotonsillitis        | 0542A | 05401 |
| B00.3 | Herpesviral meningitis                                       | 0543A |       |
| B00.4 | Herpesviral encephalitis                                     | 0543B | 05404 |
| B00.5 | Herpesviral ocular disease                                   | 0544  | 05405 |
| B00.7 | Disseminated herpesviral disease                             | 0545A |       |
| B00.8 | Other forms of herpesviral infection                         | 0542B | 05406 |
| B00.8 | Other forms of herpesviral infection                         | 0546A |       |
| B00.8 | Other forms of herpesviral infection                         | 0548X |       |
| B00.8 | Other forms of herpesviral infection                         | 0574X |       |
| B00.9 | Herpesviral infection, unspecified                           |       | 05407 |
| B00.9 | Herpesviral infection, unspecified                           |       | 05409 |
| B01   | Varicella [chickenpox]                                       | 052   | 052   |
| B01.0 | Varicella meningitis                                         |       |       |
| B01.1 | Varicella encephalitis                                       | 0520A | 05200 |
| B01.2 | Varicella pneumonia                                          | 0520B |       |

|       |                                                                                    |       |       |
|-------|------------------------------------------------------------------------------------|-------|-------|
| B01.8 | Varicella with other complications                                                 | 0527A | 05201 |
| B01.9 | Varicella without complication                                                     | 0529X | 05207 |
| B01.9 | Varicella without complication                                                     |       | 05209 |
| B02   | Zoster [herpes zoster]                                                             | 053   | 053   |
| B02.0 | Zoster encephalitis                                                                |       |       |
| B02.1 | Zoster meningitis                                                                  | 0530A |       |
| B02.2 | Zoster with other nervous system involvement                                       | 0531A |       |
| B02.3 | Zoster ocular disease                                                              | 0532A | 05300 |
| B02.3 | Zoster ocular disease                                                              | 0532B |       |
| B02.3 | Zoster ocular disease                                                              | 0532C |       |
| B02.3 | Zoster ocular disease                                                              | 0532X |       |
| B02.7 | Disseminated zoster                                                                | 0538A | 05302 |
| B02.8 | Zoster with other complications                                                    | 0537A | 05301 |
| B02.8 | Zoster with other complications                                                    | 0538X | 05306 |
| B02.9 | Zoster without complication                                                        | 0539X | 05307 |
| B02.9 | Zoster without complication                                                        |       | 05309 |
| B04*  | Monkeypox                                                                          |       |       |
| B05   | Measles                                                                            | 055   | 055   |
| B05.0 | Measles complicated by encephalitis                                                | 0550A |       |
| B05.1 | Measles complicated by meningitis                                                  |       |       |
| B05.2 | Measles complicated by pneumonia                                                   | 0551A |       |
| B05.3 | Measles complicated by otitis media                                                | 0552A |       |
| B05.4 | Measles with intestinal complications                                              |       |       |
| B05.8 | Measles with other complications                                                   | 0557X |       |
| B05.8 | Measles with other complications                                                   | 0558X |       |
| B05.9 | Measles without complication                                                       | 0559X | 05597 |
| B05.9 | Measles without complication                                                       |       | 05599 |
| B06   | Rubella [German measles]                                                           | 056   | 056   |
| B06.0 | Rubella with neurological complications                                            | 0560A |       |
| B06.8 | Rubella with other complications                                                   | 0567A |       |
| B06.8 | Rubella with other complications                                                   | 0567X |       |
| B06.8 | Rubella with other complications                                                   | 0568X |       |
| B06.9 | Rubella without complication                                                       | 0569A | 05697 |
| B06.9 | Rubella without complication                                                       | 0569X | 05699 |
| B07   | Viral warts                                                                        | 0781A |       |
| B07   | Viral warts                                                                        | 0781B | 07910 |
| B08.0 | Other orthopoxvirus infections                                                     | 051   | 051   |
| B08.1 | Molluscum contagiosum                                                              | 0780A | 07900 |
| B08.2 | Exanthema subitum [sixth disease]                                                  | 0578A | 05710 |
| B08.3 | Erythema infectiosum [fifth disease]                                               | 0570A | 05700 |
| B08.4 | Enteroviral vesicular stomatitis with exanthem                                     | 0743A | 07940 |
| B08.5 | Enteroviral vesicular pharyngitis                                                  | 0740A | 07400 |
| B08.8 | Other specified viral infections characterized by skin and mucous membrane lesions | 0578X | 05788 |
| B09   | Unspecified viral infection characterized by skin and mucous membrane lesions      | 0579X | 05797 |
| B09   | Unspecified viral infection characterized by skin and mucous membrane lesions      |       | 05799 |
| B15   | Acute hepatitis A                                                                  |       |       |
| B15.0 | Hepatitis A with hepatic coma                                                      | 0700A |       |
| B15.9 | Hepatitis A without hepatic coma                                                   | 0701A |       |
| B16   | Acute hepatitis B                                                                  |       |       |
| B16.0 | Acute hepatitis B with delta-agent (coinfection) with hepatic coma                 |       |       |

|       |                                                                                           |       |       |
|-------|-------------------------------------------------------------------------------------------|-------|-------|
| B16.1 | Acute hepatitis B with delta-agent (coinfection) without hepatic coma                     |       |       |
| B16.2 | Acute hepatitis B without delta-agent with hepatic coma                                   |       |       |
| B16.9 | Acute hepatitis B without delta-agent and without hepatic coma                            |       |       |
| B17*  | Other acute viral hepatitis                                                               |       |       |
| B18*  | Chronic viral hepatitis                                                                   |       |       |
| B18.1 | Chronic viral hepatitis B without delta-agent                                             | V026A |       |
| B18.1 | Chronic viral hepatitis B without delta-agent                                             | V026B |       |
| B19   | Unspecified viral hepatitis                                                               |       |       |
| B19.0 | Unspecified viral hepatitis with hepatic coma                                             | 0702A |       |
| B19.0 | Unspecified viral hepatitis with hepatic coma                                             | 0704A |       |
| B19.0 | Unspecified viral hepatitis with hepatic coma                                             | 0706X |       |
| B19.9 | Unspecified viral hepatitis without hepatic coma                                          | 0703A |       |
| B19.9 | Unspecified viral hepatitis without hepatic coma                                          | 0705A |       |
| B19.9 | Unspecified viral hepatitis without hepatic coma                                          | 0709X |       |
| B19.9 | Unspecified viral hepatitis without hepatic coma                                          |       | 07001 |
| B19.9 | Unspecified viral hepatitis without hepatic coma                                          |       | 07002 |
| B19.9 | Unspecified viral hepatitis without hepatic coma                                          |       | 07003 |
| B19.9 | Unspecified viral hepatitis without hepatic coma                                          |       | 07004 |
| B19.9 | Unspecified viral hepatitis without hepatic coma                                          |       | 07007 |
| B19.9 | Unspecified viral hepatitis without hepatic coma                                          |       | 07009 |
| B20*  | Human immunodeficiency virus [HIV] disease resulting in infectious and parasitic diseases |       |       |
| B21*  | Human immunodeficiency virus [HIV] disease resulting in malignant neoplasms               |       |       |
| B21.0 | HIV disease resulting in Kaposi sarcoma                                                   |       |       |
| B22   | Human immunodeficiency virus [HIV] disease resulting in other specified diseases          |       |       |
| B22.0 | HIV disease resulting in encephalopathy                                                   |       |       |
| B22.1 | HIV disease resulting in lymphoid interstitial pneumonitis                                |       |       |
| B22.2 | HIV disease resulting in wasting syndrome                                                 |       |       |
| B22.7 | HIV disease resulting in multiple diseases classified elsewhere                           |       |       |
| B23*  | Human immunodeficiency virus [HIV] disease resulting in other conditions                  |       |       |
| B24   | Unspecified human immunodeficiency virus [HIV] disease                                    | 0788A |       |
| B24   | Unspecified human immunodeficiency virus [HIV] disease                                    | 0788B |       |
| B24   | Unspecified human immunodeficiency virus [HIV] disease                                    | 0788C |       |
| B25*  | Cytomegaloviral disease                                                                   |       |       |
| B25.0 | Cytomegaloviral pneumonitis                                                               | 0785C |       |
| B25.1 | Cytomegaloviral hepatitis                                                                 | 0785B |       |
| B25.8 | Other cytomegaloviral diseases                                                            | 0785X |       |
| B25.9 | Cytomegaloviral disease, unspecified                                                      |       | 07951 |
| B25.9 | Cytomegaloviral disease, unspecified                                                      |       | 07959 |
| B26   | Mumps                                                                                     | 072   | 072   |
| B26.0 | Mumps orchitis                                                                            | 0720A | 07202 |
| B26.1 | Mumps meningitis                                                                          | 0721A |       |
| B26.2 | Mumps encephalitis                                                                        | 0722A | 07201 |
| B26.3 | Mumps pancreatitis                                                                        | 0723A | 07200 |
| B26.8 | Mumps with other complications                                                            | 0727X | 07203 |
| B26.8 | Mumps with other complications                                                            | 0728X | 07204 |
| B26.8 | Mumps with other complications                                                            |       | 07206 |
| B26.9 | Mumps without complication                                                                | 0729X | 07207 |
| B26.9 | Mumps without complication                                                                |       | 07209 |
| B27   | Infectious mononucleosis                                                                  |       |       |
| B27.0 | Gammaherpesviral mononucleosis                                                            | 0750A |       |

|             |                                                     |       |       |
|-------------|-----------------------------------------------------|-------|-------|
| B27.0       | Gammaherpesviral mononucleosis                      | 0750X |       |
| B27.1       | Cytomegaloviral mononucleosis                       | 0785A |       |
| B27.8       | Other infectious mononucleosis                      |       |       |
| B27.9       | Infectious mononucleosis, unspecified               |       | 07501 |
| G05.1*B27.9 | Infectious mononucleosis, unspecified               |       | 07502 |
| B27.9       | Infectious mononucleosis, unspecified               |       | 07507 |
| B27.9       | Infectious mononucleosis, unspecified               |       | 07508 |
| B27.9       | Infectious mononucleosis, unspecified               |       | 07509 |
| B30         | Viral conjunctivitis                                | 0770A | 07800 |
| B30         | Viral conjunctivitis                                | 0771A | 07810 |
| B30         | Viral conjunctivitis                                | 0772A | 07820 |
| B30         | Viral conjunctivitis                                | 0773A | 07880 |
| B30         | Viral conjunctivitis                                | 0774A | 07899 |
| B30         | Viral conjunctivitis                                | 0778X |       |
| B30         | Viral conjunctivitis                                | 0779X |       |
| B33         | Other viral diseases, not elsewhere classified      |       |       |
| B33.0       | Epidemic myalgia                                    | 0741A | 07410 |
| B33.1       | Ross River disease                                  |       |       |
| B33.2       | Viral carditis                                      |       |       |
| B33.3       | Retrovirus infections, not elsewhere classified     | 0788D |       |
| B33.4       | Hantavirus (cardio-)pulmonary syndrome [HPS] [HCPS] |       |       |
| B33.8       | Other specified viral diseases                      | 0788X |       |
| B34         | Viral infection of unspecified site                 |       |       |
| B34.0       | Adenovirus infection, unspecified site              |       | 07981 |
| B34.1       | Enterovirus infection, unspecified site             |       | 07499 |
| B34.1       | Enterovirus infection, unspecified site             |       | 07980 |
| B34.2       | Coronavirus infection, unspecified site             |       |       |
| B34.3       | Parvovirus infection, unspecified site              |       |       |
| B34.4       | Papovavirus infection, unspecified site             |       |       |
| B34.8       | Other viral infections of unspecified site          |       | 07988 |
| B34.9       | Viral infection, unspecified                        |       | 07997 |
| B34.9       | Viral infection, unspecified                        |       | 07999 |
| B35         | Dermatophytosis                                     | 110   | 110   |
| B36         | Other superficial mycoses                           | 111   | 111   |
| B37         | Candidiasis                                         | 112   | 112   |
| B37.0       | Candidal stomatitis                                 | 1120A |       |
| B37.1       | Pulmonary candidiasis                               | 1124A |       |
| B37.2       | Candidiasis of skin and nail                        | 1123A |       |
| B37.3       | Candidiasis of vulva and vagina                     | 1121A |       |
| B37.4       | Candidiasis of other urogenital sites               | 1122A |       |
| B37.4       | Candidiasis of other urogenital sites               | 1122X |       |
| B37.5       | Candidal meningitis                                 | 1128C |       |
| B37.6       | Candidal endocarditis                               | 1128A |       |
| B37.7       | Candidal sepsis                                     | 1125A |       |
| B37.8       | Candidiasis of other sites                          | 1120B |       |
| B37.8       | Candidiasis of other sites                          | 1128B |       |
| B37.8       | Candidiasis of other sites                          | 1128X |       |
| B37.9       | Candidiasis, unspecified                            | 1129X |       |
| B38         | Coccidioidomycosis                                  | 114   | 114   |
| B38.0       | Acute pulmonary coccidioidomycosis                  |       |       |

|       |                                                 |       |       |
|-------|-------------------------------------------------|-------|-------|
| B38.1 | Chronic pulmonary coccidioidomycosis            |       |       |
| B38.2 | Pulmonary coccidioidomycosis, unspecified       |       |       |
| B38.3 | Cutaneous coccidioidomycosis                    |       |       |
| B38.4 | Coccidioidomycosis meningitis                   |       |       |
| B38.7 | Disseminated coccidioidomycosis                 |       |       |
| B38.8 | Other forms of coccidioidomycosis               |       |       |
| B38.9 | Coccidioidomycosis, unspecified                 |       |       |
| B39   | Histoplasmosis                                  | 115   | 115   |
| B39.0 | Acute pulmonary histoplasmosis capsulati        |       |       |
| B39.1 | Chronic pulmonary histoplasmosis capsulati      |       |       |
| B39.2 | Pulmonary histoplasmosis capsulati, unspecified |       |       |
| B39.3 | Disseminated histoplasmosis capsulati           |       |       |
| B39.4 | Histoplasmosis capsulati, unspecified           |       |       |
| B39.5 | Histoplasmosis duboisii                         |       |       |
| B39.9 | Histoplasmosis, unspecified                     |       |       |
| B40   | Blastomycosis                                   | 116   | 116   |
| B40.0 | Acute pulmonary blastomycosis                   |       |       |
| B40.1 | Chronic pulmonary blastomycosis                 |       |       |
| B40.2 | Pulmonary blastomycosis, unspecified            |       |       |
| B40.3 | Cutaneous blastomycosis                         |       |       |
| B40.7 | Disseminated blastomycosis                      |       |       |
| B40.8 | Other forms of blastomycosis                    |       |       |
| B40.9 | Blastomycosis, unspecified                      |       |       |
| B41   | Paracoccidioidomycosis                          |       |       |
| B41.0 | Pulmonary paracoccidioidomycosis                |       |       |
| B41.7 | Disseminated paracoccidioidomycosis             |       |       |
| B41.8 | Other forms of paracoccidioidomycosis           |       |       |
| B41.9 | Paracoccidioidomycosis, unspecified             |       |       |
| B42   | Sporotrichosis                                  |       |       |
| B42.0 | Pulmonary sporotrichosis                        |       |       |
| B42.1 | Lymphocutaneous sporotrichosis                  |       |       |
| B42.7 | Disseminated sporotrichosis                     |       |       |
| B42.8 | Other forms of sporotrichosis                   |       |       |
| B42.9 | Sporotrichosis, unspecified                     | 1171A | 11710 |
| B43   | Chromomycosis and phaeomycotic abscess          |       |       |
| B43.0 | Cutaneous chromomycosis                         |       |       |
| B43.1 | Phaeomycotic brain abscess                      |       |       |
| B43.2 | Subcutaneous phaeomycotic abscess and cyst      |       |       |
| B43.8 | Other forms of chromomycosis                    |       |       |
| B43.9 | Chromomycosis, unspecified                      | 1172A | 11720 |
| B44*  | Aspergillosis                                   |       |       |
| B44.9 | Aspergillosis, unspecified                      | 1173A | 11730 |
| B45   | Cryptococcosis                                  |       |       |
| B45.0 | Pulmonary cryptococcosis                        |       |       |
| B45.1 | Cerebral cryptococcosis                         |       |       |
| B45.2 | Cutaneous cryptococcosis                        |       |       |
| B45.3 | Osseous cryptococcosis                          |       |       |
| B45.7 | Disseminated cryptococcosis                     |       |       |
| B45.8 | Other forms of cryptococcosis                   |       |       |
| B45.9 | Cryptococcosis, unspecified                     | 1175A |       |

|       |                                                                     |       |       |
|-------|---------------------------------------------------------------------|-------|-------|
| B46   | Zygomycosis                                                         |       |       |
| B46.0 | Pulmonary mucormycosis                                              |       |       |
| B46.1 | Rhinocerebral mucormycosis                                          |       |       |
| B46.2 | Gastrointestinal mucormycosis                                       |       |       |
| B46.3 | Cutaneous mucormycosis                                              |       |       |
| B46.4 | Disseminated mucormycosis                                           |       |       |
| B46.5 | Mucormycosis, unspecified                                           | 1177A |       |
| B46.8 | Other zygomycoses                                                   |       |       |
| B46.9 | Zygomycosis, unspecified                                            |       |       |
| B47   | Mycetoma                                                            |       |       |
| B47.0 | Eumycetoma                                                          | 1174A | 11740 |
| B47.1 | Actinomycetoma                                                      | 0394A |       |
| B47.9 | Mycetoma, unspecified                                               |       |       |
| B48   | Other mycoses, not elsewhere classified                             |       |       |
| B48.0 | Lobomycosis                                                         |       |       |
| B48.1 | Rhinosporidiosis                                                    | 1170A | 11700 |
| B48.2 | Allescheriasis                                                      | 1176A |       |
| B48.3 | Geotrichosis                                                        |       |       |
| B48.4 | Penicillois                                                         |       |       |
| B48.7 | Opportunistic mycoses                                               | 118   |       |
| B48.8 | Other specified mycoses                                             | 1178A | 11788 |
| B48.8 | Other specified mycoses                                             | 1178B |       |
| B49   | Unspecified mycosis                                                 | 117   |       |
| B49   | Unspecified mycosis                                                 | 1179X | 11799 |
| B50*  | Plasmodium falciparum malaria                                       |       |       |
| B50.0 | Plasmodium falciparum malaria with cerebral complications           |       |       |
| B50.8 | Other severe and complicated Plasmodium falciparum malaria          | 0848A |       |
| B50.9 | Plasmodium falciparum malaria, unspecified                          | 0840A | 08400 |
| B51   | Plasmodium vivax malaria                                            | 0841A | 08410 |
| B52   | Plasmodium malariae malaria                                         | 0842A | 08420 |
| B53   | Other parasitologically confirmed malaria                           |       |       |
| B53.0 | Plasmodium ovale malaria                                            | 0843A | 08430 |
| B53.1 | Malaria due to simian plasmodia                                     |       |       |
| B53.8 | Other parasitologically confirmed malaria, not elsewhere classified | 0844X | 08488 |
| B54   | Unspecified malaria                                                 | 0845A | 08440 |
| B54   | Unspecified malaria                                                 | 0846X | 08450 |
| B54   | Unspecified malaria                                                 | 0847A | 08497 |
| B54   | Unspecified malaria                                                 | 0849X | 08499 |
| B55.0 | Visceral leishmaniasis                                              | 0850A | 08500 |
| B55.1 | Cutaneous leishmaniasis                                             | 0851A | 08510 |
| B55.2 | Mucocutaneous leishmaniasis                                         | 0855A | 08520 |
| B55.9 | Leishmaniasis, unspecified                                          | 085   | 08599 |
| B55.9 | Leishmaniasis, unspecified                                          | 0859X | 08597 |
| B56*  | African trypanosomiasis                                             |       |       |
| B56.0 | Gambiense trypanosomiasis                                           | 0863A |       |
| B56.1 | Rhodesiense trypanosomiasis                                         | 0864A |       |
| B56.9 | African trypanosomiasis, unspecified                                | 0865A |       |
| B57*  | Chagas disease                                                      |       |       |
| B57.0 | Acute Chagas disease with heart involvement                         | 0860A |       |
| B57.2 | Chagas disease (chronic) with heart involvement                     | 0861A |       |

|       |                                                                          |       |       |
|-------|--------------------------------------------------------------------------|-------|-------|
| B57.2 | Chagas disease (chronic) with heart involvement                          | 0862A | 08699 |
| B58   | Toxoplasmosis                                                            |       |       |
| B58.0 | Toxoplasma oculopathy                                                    | 1302A |       |
| B58.1 | Toxoplasma hepatitis                                                     | 1305A |       |
| B58.2 | Toxoplasma meningoencephalitis                                           | 1300A |       |
| B58.3 | Pulmonary toxoplasmosis                                                  | 1304A |       |
| B58.8 | Toxoplasmosis with other organ involvement                               | 1303A |       |
| B58.8 | Toxoplasmosis with other organ involvement                               | 1307X |       |
| B58.8 | Toxoplasmosis with other organ involvement                               | 1308A |       |
| B58.9 | Toxoplasmosis, unspecified                                               | 1308X | 13000 |
| B58.9 | Toxoplasmosis, unspecified                                               | 1309X | 13099 |
| B59   | Pneumocystosis                                                           | 1363A | 13601 |
| B60.0 | Babesiosis                                                               |       |       |
| B60.1 | Acanthamoebiasis                                                         |       |       |
| B60.2 | Naegleriasis                                                             | 1362A |       |
| B60.8 | Other specified protozoal diseases                                       |       | 08799 |
| B64   | Unspecified protozoal disease                                            | 0869X |       |
| B64   | Unspecified protozoal disease                                            |       | 13602 |
| B65   | Schistosomiasis [bilharziasis]                                           | 120   |       |
| B65.0 | Schistosomiasis due to Schistosoma haematobium [urinary schistosomiasis] | 1200A | 12000 |
| B65.1 | Schistosomiasis due to Schistosoma mansoni [intestinal schistosomiasis]  | 1201A | 12010 |
| B65.2 | Schistosomiasis due to Schistosoma japonicum                             | 1202A | 12020 |
| B65.3 | Cercarial dermatitis                                                     | 1203A | 12030 |
| B65.8 | Other schistosomiasis                                                    | 1208X | 12088 |
| B65.9 | Schistosomiasis, unspecified                                             | 1209X | 12097 |
| B65.9 | Schistosomiasis, unspecified                                             |       | 12099 |
| B66   | Other fluke infections                                                   | 121   |       |
| B66.0 | Opisthorchiasis                                                          | 1210A |       |
| B66.1 | Clonorchiasis                                                            | 1211A |       |
| B66.2 | Dicrocoeliasis                                                           |       |       |
| B66.3 | Fascioliasis                                                             | 1213A |       |
| B66.4 | Paragonimiasis                                                           | 1212A |       |
| B66.5 | Fasciolopsiasis                                                          |       |       |
| B66.8 | Other specified fluke infections                                         | 1218X |       |
| B66.9 | Fluke infection, unspecified                                             | 1219X | 12199 |
| B67   | Echinococcosis                                                           | 122   | 122   |
| B68   | Taeniasis                                                                |       |       |
| B68.0 | Taenia solium taeniasis                                                  | 1230A | 12300 |
| B68.1 | Taenia saginata taeniasis                                                | 1232A | 12320 |
| B68.9 | Taeniasis, unspecified                                                   | 1233A | 12330 |
| B69   | Cysticercosis                                                            | 1231A | 12311 |
| B69.0 | Cysticercosis of central nervous system                                  |       |       |
| B69.1 | Cysticercosis of eye                                                     |       |       |
| B69.8 | Cysticercosis of other sites                                             |       |       |
| B69.9 | Cysticercosis, unspecified                                               |       |       |
| B70   | Diphyllobothriasis and sparganosis                                       |       |       |
| B70.0 | Diphyllobothriasis                                                       | 1234A | 12340 |
| B70.1 | Sparganosis                                                              | 1235A | 12350 |
| B71   | Other cestode infections                                                 |       |       |
| B71.0 | Hymenolepiasis                                                           | 1236A | 12360 |

|       |                                                                                        |       |       |
|-------|----------------------------------------------------------------------------------------|-------|-------|
| B71.1 | Dipylidiasis                                                                           |       |       |
| B71.8 | Other specified cestode infections                                                     | 1238X | 12398 |
| B71.9 | Cestode infection, unspecified                                                         | 123   |       |
| B71.9 | Cestode infection, unspecified                                                         | 1239X | 12399 |
| B72*  | Dracunculiasis                                                                         |       |       |
| B73*  | Onchocerciasis                                                                         |       |       |
| B74   | Filariasis                                                                             | 125   | 125   |
| B75   | Trichinellosis                                                                         | 124   | 124   |
| B76   | Hookworm diseases                                                                      | 126   | 126   |
| B77*  | Ascariasis                                                                             |       |       |
| B77.9 | Ascariasis, unspecified                                                                | 1270A | 12700 |
| B78*  | Strongyloidiasis                                                                       |       |       |
| B78.9 | Strongyloidiasis, unspecified                                                          | 1272A | 12710 |
| B79   | Trichuriasis                                                                           | 1273A | 12720 |
| B80   | Enterobiasis                                                                           | 1274A | 12730 |
| B81   | Other intestinal helminthiasis, not elsewhere classified                               |       |       |
| B81.0 | Anisakiasis                                                                            | 1271A |       |
| B81.1 | Intestinal capillariasis                                                               | 1275A |       |
| B81.2 | Trichostrongyliasis                                                                    | 1276A |       |
| B81.3 | Intestinal angiostrongyliasis                                                          |       |       |
| B81.4 | Mixed intestinal helminthiasis                                                         | 1278X | 12750 |
| B81.8 | Other specified intestinal helminthiasis                                               | 1277X | 12740 |
| B82   | Unspecified intestinal parasitism                                                      |       |       |
| B82.0 | Intestinal helminthiasis, unspecified                                                  | 1279X | 12799 |
| B82.9 | Intestinal parasitism, unspecified                                                     | 1290A | 12999 |
| B82.9 | Intestinal parasitism, unspecified                                                     | 1299X |       |
| B83   | Other helminthiasis                                                                    |       |       |
| B83.0 | Visceral larva migrans                                                                 | 1280A |       |
| B83.1 | Gnathostomiasis                                                                        | 1281A |       |
| B83.2 | Angiostrongyliasis due to <i>Parastrongylus cantonensis</i>                            |       |       |
| B83.3 | Syngamiasis                                                                            |       |       |
| B83.4 | Internal hirudiniasis                                                                  |       |       |
| B83.8 | Other specified helminthiasis                                                          | 1288X |       |
| B83.9 | Helminthiasis, unspecified                                                             | 1289X | 12899 |
| B85   | Pediculosis and phthiriasis                                                            | 132   | 132   |
| B85   | Pediculosis and phthiriasis                                                            |       | 13410 |
| B86   | Scabies                                                                                | 1330A | 13300 |
| B87*  | Myiasis                                                                                |       |       |
| B87.9 | Myiasis, unspecified                                                                   | 1340A | 13400 |
| B88   | Other infestations                                                                     |       |       |
| B88.0 | Other acaridiasis                                                                      | 1338X | 13390 |
| B88.0 | Other acaridiasis                                                                      |       | 13398 |
| B88.1 | Tungiasis [sandflea infestation]                                                       |       |       |
| B88.2 | Other arthropod infestations                                                           | 1341A | 13420 |
| B88.3 | External hirudiniasis                                                                  |       |       |
| B88.8 | Other specified infestations                                                           | 1348X | 13498 |
| B88.9 | Infestation, unspecified                                                               | 1339X | 13399 |
| B88.9 | Infestation, unspecified                                                               | 1342A | 13430 |
| B89   | Unspecified parasitic disease                                                          | 1349X | 13499 |
| B95*  | Streptococcus and staphylococcus as the cause of diseases classified to other chapters |       |       |



|       |                                                                                                |       |       |
|-------|------------------------------------------------------------------------------------------------|-------|-------|
| B95.3 | Streptococcus pneumoniae as the cause of diseases classified to other chapters                 | 0412A |       |
| B95.5 | Unspecified streptococcus as the cause of diseases classified to other chapters                | 0410A |       |
| B95.8 | Unspecified staphylococcus as the cause of diseases classified to other chapters               | 0411A |       |
| B96.0 | Mycoplasma pneumoniae [M. pneumoniae] as the cause of diseases classified to other chapters    |       |       |
| B96.1 | Klebsiella pneumoniae [K. pneumoniae] as the cause of diseases classified to other chapters    | 0413A |       |
| B96.2 | Escherichia coli [E. coli] as the cause of diseases classified to other chapters               | 0414A |       |
| B96.3 | Haemophilus influenzae [H. influenzae] as the cause of diseases classified to other chapters   | 0415A |       |
| B96.4 | Proteus (mirabilis)(morganii) as the cause of diseases classified to other chapters            | 0416A |       |
| B96.5 | Pseudomonas (aeruginosa) as the cause of diseases classified to other chapters                 | 0417A |       |
| B96.6 | Bacillus fragilis [B. fragilis] as the cause of diseases classified to other chapters          |       |       |
| B96.7 | Clostridium perfringens [C. perfringens] as the cause of diseases classified to other chapters |       |       |
| B96.8 | Other specified bacterial agents as the cause of diseases classified to other chapters         |       |       |
| B97   | Viral agents as the cause of diseases classified to other chapters                             |       |       |
| B97.0 | Adenovirus as the cause of diseases classified to other chapters                               | 0790A |       |
| B97.1 | Enterovirus as the cause of diseases classified to other chapters                              | 0742A | 07401 |
| B97.1 | Enterovirus as the cause of diseases classified to other chapters                              | 0748X | 07420 |
| B97.1 | Enterovirus as the cause of diseases classified to other chapters                              | 0791A |       |
| B97.1 | Enterovirus as the cause of diseases classified to other chapters                              | 0793A |       |
| B97.1 | Enterovirus as the cause of diseases classified to other chapters                              |       | 07421 |
| B97.1 | Enterovirus as the cause of diseases classified to other chapters                              |       | 07498 |
| B97.2 | Coronavirus as the cause of diseases classified to other chapters                              |       |       |
| B97.3 | Retrovirus as the cause of diseases classified to other chapters                               |       |       |
| B97.4 | Respiratory syncytial virus as the cause of diseases classified to other chapters              |       |       |
| B97.5 | Reovirus as the cause of diseases classified to other chapters                                 |       |       |
| B97.6 | Parvovirus as the cause of diseases classified to other chapters                               |       |       |
| B97.7 | Papillomavirus as the cause of diseases classified to other chapters                           |       |       |
| B97.8 | Other viral agents as the cause of diseases classified to other chapters                       | 0798X |       |
| B97.8 | Other viral agents as the cause of diseases classified to other chapters                       | 0799X |       |
| B98.0 | Helicobacter pylori [H.pylori] as the cause of diseases classified to other chapters           |       |       |
| B98.1 | Vibrio vulnificus as the cause of diseases classified to other chapters                        |       |       |
| B99   | Other and unspecified infectious diseases                                                      | 0888X |       |
| B99   | Other and unspecified infectious diseases                                                      | 0889X |       |
| B99   | Other and unspecified infectious diseases                                                      | 1364A |       |
| B99   | Other and unspecified infectious diseases                                                      | 1368X |       |
| B99   | Other and unspecified infectious diseases                                                      | 1369X |       |
| B99   | Other and unspecified infectious diseases                                                      |       | 08990 |
| B99   | Other and unspecified infectious diseases                                                      |       | 13608 |
| B99   | Other and unspecified infectious diseases                                                      |       | 13609 |
| C46   | Kaposi sarcoma                                                                                 |       |       |
| D73.3 | Abscess of spleen                                                                              |       |       |
| E32.1 | Abscess of thymus                                                                              | 2541A |       |
| G00   | Bacterial meningitis, not elsewhere classified                                                 |       |       |
| G00.0 | Haemophilus meningitis                                                                         | 3200A | 32000 |
| G00.1 | Pneumococcal meningitis                                                                        | 3201A | 32010 |
| G00.2 | Streptococcal meningitis                                                                       | 3202A | 32080 |
| G00.3 | Staphylococcal meningitis                                                                      | 3203A |       |
| G00.8 | Other bacterial meningitis                                                                     | 3208X | 32088 |
| G00.9 | Bacterial meningitis, unspecified                                                              | 3209X | 32099 |
| G01*  | Meningitis in bacterial diseases classified elsewhere                                          |       |       |
| G02.0 | Meningitis in viral diseases classified elsewhere                                              |       |       |

|       |                                                                                                              |       |       |
|-------|--------------------------------------------------------------------------------------------------------------|-------|-------|
| G02.1 | Meningitis in mycoses                                                                                        |       |       |
| G02.8 | Meningitis in other specified infectious and parasitic diseases classified elsewhere                         |       |       |
| G03*  | Meningitis due to other and unspecified causes                                                               |       |       |
| G03.9 | Meningitis, unspecified                                                                                      | 3229X |       |
| G04.0 | Acute disseminated encephalitis                                                                              | 3235A |       |
| G04.1 | Tropical spastic paraplegia                                                                                  |       |       |
| G04.2 | Bacterial meningoenkephalitis and meningomyelitis, not elsewhere classified                                  | 3238A |       |
| G04.8 | Other encephalitis, myelitis and encephalomyelitis                                                           | 3238B |       |
| G04.8 | Other encephalitis, myelitis and encephalomyelitis                                                           | 3238X | 32300 |
| G04.9 | Encephalitis, myelitis and encephalomyelitis, unspecified                                                    | 3239X |       |
| G04.9 | Encephalitis, myelitis and encephalomyelitis, unspecified                                                    |       | 32308 |
| G04.9 | Encephalitis, myelitis and encephalomyelitis, unspecified                                                    |       | 32309 |
| G05.0 | Encephalitis, myelitis and encephalomyelitis in bacterial diseases classified elsewhere                      |       |       |
| G05.1 | Encephalitis, myelitis and encephalomyelitis in viral diseases classified elsewhere                          |       |       |
| G05.2 | Encephalitis, myelitis and encephalomyelitis in other infectious and parasitic diseases classified elsewhere |       |       |
| G06   | Intracranial and intraspinal abscess and granuloma                                                           | 3249X | 32201 |
| G06   | Intracranial and intraspinal abscess and granuloma                                                           |       | 32202 |
| G06   | Intracranial and intraspinal abscess and granuloma                                                           |       | 32203 |
| G06.0 | Intracranial abscess and granuloma                                                                           | 3240A | 32200 |
| G06.1 | Intraspinal abscess and granuloma                                                                            | 3241A |       |
| G07*  | Intracranial and intraspinal abscess and granuloma in diseases classified elsewhere                          |       |       |
| H00*  | Hordeolum and chalazion                                                                                      |       |       |
| H00.0 | Hordeolum and other deep inflammation of eyelid                                                              | 3731A | 36200 |
| H00.0 | Hordeolum and other deep inflammation of eyelid                                                              |       | 36201 |
| H00.0 | Hordeolum and other deep inflammation of eyelid                                                              |       | 36202 |
| H00.0 | Hordeolum and other deep inflammation of eyelid                                                              |       | 36209 |
| H00.1 | Chalazion                                                                                                    | 3732A | 37800 |
| H01.0 | Blepharitis                                                                                                  |       | 36101 |
| H01.8 | Other specified inflammation of eyelid                                                                       | 3738X |       |
| H01.9 | Inflammation of eyelid, unspecified                                                                          | 3739X | 36109 |
| H05.0 | Acute inflammation of orbit                                                                                  | 3760A | 36900 |
| H05.0 | Acute inflammation of orbit                                                                                  |       | 36901 |
| H05.0 | Acute inflammation of orbit                                                                                  |       | 36902 |
| H06.1 | Parasitic infestation of orbit in diseases classified elsewhere                                              |       |       |
| H10.0 | Mucopurulent conjunctivitis                                                                                  | 3720A | 36000 |
| H10.5 | Blepharoconjunctivitis                                                                                       | 3730A |       |
| H13.0 | Filarial infection of conjunctiva                                                                            |       |       |
| H19.0 | Scleritis and episcleritis in diseases classified elsewhere                                                  |       |       |
| H19.1 | Herpesviral keratitis and keratoconjunctivitis                                                               |       |       |
| H19.2 | Keratitis and keratoconjunctivitis in other infectious and parasitic diseases classified elsewhere           |       |       |
| H22.0 | Iridocyclitis in infectious and parasitic diseases classified elsewhere                                      |       |       |
| H32.0 | Chorioretinal inflammation in infectious and parasitic diseases classified elsewhere                         |       |       |
| H44.0 | Purulent endophthalmitis                                                                                     | 3600A | 36600 |
| H44.0 | Purulent endophthalmitis                                                                                     |       | 36601 |
| H60.0 | Abscess of external ear                                                                                      |       | 38000 |
| H60.0 | Abscess of external ear                                                                                      |       | 38001 |
| H60.1 | Cellulitis of external ear                                                                                   | 3800A |       |
| H60.2 | Malignant otitis externa                                                                                     | 3801C |       |
| H60.3 | Other infective otitis externa                                                                               | 3801A |       |
| H60.3 | Other infective otitis externa                                                                               | 3801B |       |

|       |                                                                                       |       |       |
|-------|---------------------------------------------------------------------------------------|-------|-------|
| H62.0 | Otitis externa in bacterial diseases classified elsewhere                             |       |       |
| H62.1 | Otitis externa in viral diseases classified elsewhere                                 |       |       |
| H62.2 | Otitis externa in mycoses                                                             | 3801E |       |
| H62.3 | Otitis externa in other infectious and parasitic diseases classified elsewhere        |       |       |
| H66.0 | Acute suppurative otitis media                                                        | 3820A | 38200 |
| H67.0 | Otitis in bacterial diseases classified elsewhere                                     |       |       |
| H67.1 | Otitis media in viral diseases classified elsewhere                                   |       |       |
| H70.0 | Acute mastoiditis                                                                     | 3830A | 38300 |
| H75.0 | Mastoiditis in infectious and parasitic diseases classified elsewhere                 |       |       |
| I30.1 | Infective pericarditis                                                                | 4209A |       |
| I32.0 | Pericarditis in bacterial diseases classified elsewhere                               |       |       |
| I32.1 | Pericarditis in other infectious and parasitic diseases classified elsewhere          |       |       |
| I33.0 | Acute and subacute infective endocarditis                                             | 4210A | 42100 |
| I33.0 | Acute and subacute infective endocarditis                                             | 4219X |       |
| I40.0 | Infective myocarditis                                                                 | 4220A |       |
| I41.0 | Myocarditis in bacterial diseases classified elsewhere                                |       |       |
| I41.1 | Myocarditis in viral diseases classified elsewhere                                    |       |       |
| I41.2 | Myocarditis in other infectious and parasitic diseases classified elsewhere           |       |       |
| I43.0 | Cardiomyopathy in infectious and parasitic diseases classified elsewhere              |       |       |
| I52.0 | Other heart disorders in bacterial diseases classified elsewhere                      |       |       |
| I52.1 | Other heart disorders in other infectious and parasitic diseases classified elsewhere |       |       |
| I68.1 | Cerebral arteritis in infectious and parasitic diseases classified elsewhere          |       |       |
| J01   | Acute sinusitis                                                                       | 461   | 461   |
| J01.0 | Acute maxillary sinusitis                                                             |       |       |
| J02   | Acute pharyngitis                                                                     |       |       |
| J02.0 | Streptococcal pharyngitis                                                             |       |       |
| J02.8 | Acute pharyngitis due to other specified organisms                                    |       |       |
| J02.9 | Acute pharyngitis, unspecified                                                        | 462   | 462   |
| J03   | Acute tonsillitis                                                                     |       |       |
| J03.0 | Streptococcal tonsillitis                                                             | 0340  | 0340  |
| J03.8 | Acute tonsillitis due to other specified organisms                                    |       |       |
| J03.9 | Acute tonsillitis, unspecified                                                        | 463   | 463   |
| J04*  | Acute laryngitis and tracheitis                                                       |       |       |
| J04.0 | Acute laryngitis                                                                      | 4640A | 46401 |
| J04.0 | Acute laryngitis                                                                      | 4644A |       |
| J04.1 | Acute tracheitis                                                                      | 4641A |       |
| J04.2 | Acute laryngotracheitis                                                               | 4642A | 46403 |
| J05.1 | Acute epiglottitis                                                                    | 4643A | 46404 |
| J09*  | Influenza due to certain identified influenza virus                                   |       |       |
| J10*  | Influenza due to other identified influenza virus                                     |       |       |
| J11*  | Influenza, virus not identified                                                       |       |       |
| J11.0 | Influenza with pneumonia, virus not identified                                        | 4870A | 47101 |
| J11.0 | Influenza with pneumonia, virus not identified                                        |       | 47109 |
| J11.1 | Influenza with other respiratory manifestations, virus not identified                 | 4871A | 47201 |
| J11.1 | Influenza with other respiratory manifestations, virus not identified                 |       | 47202 |
| J11.1 | Influenza with other respiratory manifestations, virus not identified                 |       | 47209 |
| J11.8 | Influenza with other manifestations, virus not identified                             | 4878X | 47099 |
| J11.8 | Influenza with other manifestations, virus not identified                             |       | 47399 |
| J11.8 | Influenza with other manifestations, virus not identified                             |       | 47499 |
| J12   | Viral pneumonia, not elsewhere classified                                             | 480   | 480   |

|       |                                                                       |       |       |
|-------|-----------------------------------------------------------------------|-------|-------|
| J13   | Pneumonia due to <i>Streptococcus pneumoniae</i>                      | 481   | 481   |
| J14   | Pneumonia due to <i>Haemophilus influenzae</i>                        | 4822A | 48210 |
| J15   | Bacterial pneumonia, not elsewhere classified                         |       |       |
| J15.0 | Pneumonia due to <i>Klebsiella pneumoniae</i>                         | 4820A | 48201 |
| J15.1 | Pneumonia due to <i>Pseudomonas</i>                                   | 4821A |       |
| J15.2 | Pneumonia due to staphylococcus                                       | 4824A | 48230 |
| J15.3 | Pneumonia due to streptococcus, group B                               |       |       |
| J15.4 | Pneumonia due to other streptococci                                   |       |       |
| J15.5 | Pneumonia due to <i>Escherichia coli</i>                              |       |       |
| J15.6 | Pneumonia due to other aerobic Gram-negative bacteria                 |       |       |
| J15.7 | Pneumonia due to <i>Mycoplasma pneumoniae</i>                         | 4830A |       |
| J15.8 | Other bacterial pneumonia                                             | 4828X | 48298 |
| J15.9 | Bacterial pneumonia, unspecified                                      | 4823A | 48220 |
| J15.9 | Bacterial pneumonia, unspecified                                      | 4829X |       |
| J16   | Pneumonia due to other infectious organisms, not elsewhere classified |       |       |
| J16.0 | Chlamydial pneumonia                                                  |       |       |
| J16.8 | Pneumonia due to other specified infectious organisms                 | 4830X | 48399 |
| J17.0 | Pneumonia in bacterial diseases classified elsewhere                  |       |       |
| J17.1 | Pneumonia in viral diseases classified elsewhere                      |       |       |
| J17.2 | Pneumonia in mycoses                                                  |       |       |
| J17.3 | Pneumonia in parasitic diseases                                       |       |       |
| J17.8 | Pneumonia in other diseases classified elsewhere                      |       |       |
| J18*  | Pneumonia, organism unspecified                                       |       |       |
| J18.0 | Bronchopneumonia, unspecified                                         |       | 48501 |
| J18.0 | Bronchopneumonia, unspecified                                         |       | 48502 |
| J18.0 | Bronchopneumonia, unspecified                                         |       | 48509 |
| J18.9 | Pneumonia, unspecified                                                | 4859X | 486   |
| J20   | Acute bronchitis                                                      |       |       |
| J20.0 | Acute bronchitis due to <i>Mycoplasma pneumoniae</i>                  |       |       |
| J20.1 | Acute bronchitis due to <i>Haemophilus influenzae</i>                 |       |       |
| J20.2 | Acute bronchitis due to streptococcus                                 |       |       |
| J20.3 | Acute bronchitis due to coxsackievirus                                |       |       |
| J20.4 | Acute bronchitis due to parainfluenza virus                           |       |       |
| J20.5 | Acute bronchitis due to respiratory syncytial virus                   |       |       |
| J20.6 | Acute bronchitis due to rhinovirus                                    |       |       |
| J20.7 | Acute bronchitis due to echovirus                                     |       |       |
| J20.8 | Acute bronchitis due to other specified organisms                     |       |       |
| J20.9 | Acute bronchitis, unspecified                                         | 4660A |       |
| J21*  | Acute bronchiolitis                                                   |       |       |
| J21.0 | Acute bronchiolitis due to respiratory syncytial virus                |       |       |
| J21.1 | Acute bronchiolitis due to human metapneumovirus                      |       |       |
| J21.8 | Acute bronchiolitis due to other specified organisms                  |       |       |
| J21.9 | Acute bronchiolitis, unspecified                                      | 4661A |       |
| J22   | Unspecified acute lower respiratory infection                         |       | 46699 |
| J36   | Peritonsillar abscess                                                 | 475   | 50199 |
| J39.0 | Retropharyngeal and parapharyngeal abscess                            | 4782A |       |
| J39.0 | Retropharyngeal and parapharyngeal abscess                            | 4782B |       |
| J39.1 | Other abscess of pharynx                                              |       |       |
| J85.1 | Abscess of lung with pneumonia                                        |       |       |
| J85.2 | Abscess of lung without pneumonia                                     | 5130A | 51399 |

|       |                                                                                     |       |       |
|-------|-------------------------------------------------------------------------------------|-------|-------|
| J85.3 | Abscess of mediastinum                                                              | 5131A | 51992 |
| J86   | Pyothorax                                                                           | 510   | 510   |
| K02   | Dental caries                                                                       | 5210A | 52100 |
| K04.0 | Pulpitis                                                                            | 5220A | 52200 |
| K04.4 | Acute apical periodontitis of pulpal origin                                         | 5224A | 52240 |
| K04.5 | Chronic apical periodontitis                                                        | 5226A | 52260 |
| K04.6 | Periapical abscess with sinus                                                       |       |       |
| K04.7 | Periapical abscess without sinus                                                    | 5225A | 52250 |
| K05.0 | Acute gingivitis                                                                    | 5230A | 52300 |
| K05.2 | Acute periodontitis                                                                 | 5233A | 52330 |
| K05.3 | Chronic periodontitis                                                               | 5234A | 52340 |
| K05.3 | Chronic periodontitis                                                               |       | 52350 |
| K05.4 | Periodontosis                                                                       | 5235A |       |
| K11.3 | Abscess of salivary gland                                                           | 5273A | 52730 |
| K12.2 | Cellulitis and abscess of mouth                                                     | 5283A | 52830 |
| K23.0 | Tuberculous oesophagitis                                                            |       |       |
| K23.1 | Megaoesophagus in Chagas disease                                                    |       |       |
| K35   | Acute appendicitis                                                                  | 540   | 540   |
| K57.0 | Diverticular disease of small intestine with perforation and abscess                | 5620B | 56202 |
| K57.0 | Diverticular disease of small intestine with perforation and abscess                | 5620D |       |
| K57.2 | Diverticular disease of large intestine with perforation and abscess                | 5621B |       |
| K57.2 | Diverticular disease of large intestine with perforation and abscess                | 5621C |       |
| K57.2 | Diverticular disease of large intestine with perforation and abscess                | 5621D | 56211 |
| K57.4 | Diverticular disease of both small and large intestine with perforation and abscess |       |       |
| K57.8 | Diverticular disease of intestine, part unspecified, with perforation and abscess   |       |       |
| K61   | Abscess of anal and rectal regions                                                  | 566   | 566   |
| K63.0 | Abscess of intestine                                                                | 5695A | 56900 |
| K65.0 | Acute peritonitis                                                                   | 5672A | 56700 |
| K65.0 | Acute peritonitis                                                                   | 5672B | 56701 |
| K65.0 | Acute peritonitis                                                                   |       | 56702 |
| K65.0 | Acute peritonitis                                                                   |       | 56704 |
| K67.0 | Chlamydial peritonitis                                                              |       |       |
| K67.1 | Gonococcal peritonitis                                                              |       |       |
| K67.2 | Syphilitic peritonitis                                                              |       |       |
| K67.3 | Tuberculous peritonitis                                                             |       |       |
| K67.8 | Other disorders of peritoneum in infectious diseases classified elsewhere           |       |       |
| K75.0 | Abscess of liver                                                                    | 5720A | 57299 |
| K75.1 | Phlebitis of portal vein                                                            | 5721A |       |
| K77.0 | Liver disorders in infectious and parasitic diseases classified elsewhere           |       |       |
| L00*  | Staphylococcal scalded skin syndrome                                                |       |       |
| L01   | Impetigo                                                                            | 6868C | 68690 |
| L01   | Impetigo                                                                            |       | 68691 |
| L02   | Cutaneous abscess, furuncle and carbuncle                                           | 680   | 680   |
| L03*  | Cellulitis                                                                          |       |       |
| L03.0 | Cellulitis of finger and toe                                                        | 681   | 681   |
| L03.1 | Cellulitis of other parts of limb                                                   | 6823A | 68220 |
| L03.1 | Cellulitis of other parts of limb                                                   | 6824A | 68230 |
| L03.1 | Cellulitis of other parts of limb                                                   | 6826A |       |
| L03.1 | Cellulitis of other parts of limb                                                   | 6827A | 68250 |
| L03.2 | Cellulitis of face                                                                  | 6820A |       |

|       |                                                                               |       |       |
|-------|-------------------------------------------------------------------------------|-------|-------|
| L03.3 | Cellulitis of trunk                                                           | 6822A | 68210 |
| L03.8 | Cellulitis of other sites                                                     | 6821A | 68200 |
| L03.8 | Cellulitis of other sites                                                     | 6825A | 68240 |
| L03.8 | Cellulitis of other sites                                                     | 6828A |       |
| L03.8 | Cellulitis of other sites                                                     | 6828X | 68298 |
| L03.9 | Cellulitis, unspecified                                                       | 682   |       |
| L03.9 | Cellulitis, unspecified                                                       | 6829X | 68299 |
| L04   | Acute lymphadenitis                                                           | 683   | 683   |
| L05*  | Pilonidal cyst                                                                |       |       |
| L05.0 | Pilonidal cyst with abscess                                                   | 6850A |       |
| L08*  | Other local infections of skin and subcutaneous tissue                        |       |       |
| L08.0 | Pyoderma                                                                      | 6860A |       |
| L08.8 | Other specified local infections of skin and subcutaneous tissue              | 6868A |       |
| L08.8 | Other specified local infections of skin and subcutaneous tissue              | 6868X | 68698 |
| L08.9 | Local infection of skin and subcutaneous tissue, unspecified                  | 684   | 684   |
| L08.9 | Local infection of skin and subcutaneous tissue, unspecified                  | 6869X |       |
| L70.1 | Acne conglobata                                                               | 7061E |       |
| M00   | Pyogenic arthritis                                                            |       |       |
| M00.0 | Staphylococcal arthritis and polyarthritis                                    |       |       |
| M00.1 | Pneumococcal arthritis and polyarthritis                                      |       |       |
| M00.2 | Other streptococcal arthritis and polyarthritis                               |       |       |
| M00.8 | Arthritis and polyarthritis due to other specified bacterial agents           |       |       |
| M00.9 | Pyogenic arthritis, unspecified                                               | 7110A | 71000 |
| M00.9 | Pyogenic arthritis, unspecified                                               | 7110B | 71001 |
| M00.9 | Pyogenic arthritis, unspecified                                               | 7110C | 71002 |
| M00.9 | Pyogenic arthritis, unspecified                                               | 7110D | 71003 |
| M00.9 | Pyogenic arthritis, unspecified                                               | 7110E | 71004 |
| M00.9 | Pyogenic arthritis, unspecified                                               | 7110F | 71005 |
| M00.9 | Pyogenic arthritis, unspecified                                               | 7110G | 71006 |
| M00.9 | Pyogenic arthritis, unspecified                                               | 7110H | 71007 |
| M00.9 | Pyogenic arthritis, unspecified                                               | 7110K | 71008 |
| M00.9 | Pyogenic arthritis, unspecified                                               | 7110L | 71009 |
| M00.9 | Pyogenic arthritis, unspecified                                               | 7110X |       |
| M01.0 | Meningococcal arthritis                                                       |       |       |
| M01.1 | Tuberculous arthritis                                                         |       |       |
| M01.2 | Arthritis in Lyme disease                                                     |       |       |
| M01.3 | Arthritis in other bacterial diseases classified elsewhere                    |       |       |
| M01.4 | Rubella arthritis                                                             |       |       |
| M01.5 | Arthritis in other viral diseases classified elsewhere                        |       |       |
| M01.6 | Arthritis in mycoses                                                          |       |       |
| M01.8 | Arthritis in other infectious and parasitic diseases classified elsewhere     |       |       |
| M46.1 | Sacroiliitis, not elsewhere classified                                        | 7202A |       |
| M46.2 | Osteomyelitis of vertebra                                                     | 7208A |       |
| M46.3 | Infection of intervertebral disc (pyogenic)                                   |       |       |
| M46.5 | Other infective spondylopathies                                               |       |       |
| M46.9 | Inflammatory spondylopathy, unspecified                                       | 7209X |       |
| M49.0 | Tuberculosis of spine                                                         |       |       |
| M49.1 | Brucella spondylitis                                                          |       |       |
| M49.2 | Enterobacterial spondylitis                                                   |       |       |
| M49.3 | Spondylopathy in other infectious and parasitic diseases classified elsewhere |       |       |

|       |                                                                                                |       |       |
|-------|------------------------------------------------------------------------------------------------|-------|-------|
| M60.0 | Infective myositis                                                                             | 7280A |       |
| M63.0 | Myositis in bacterial diseases classified elsewhere                                            |       |       |
| M63.1 | Myositis in protozoal and parasitic infections classified elsewhere                            |       |       |
| M63.2 | Myositis in other infectious diseases classified elsewhere                                     |       |       |
| M65.0 | Abscess of tendon sheath                                                                       |       |       |
| M65.1 | Other infective (teno)synovitis                                                                |       |       |
| M71.0 | Abscess of bursa                                                                               |       |       |
| M71.1 | Other infective bursitis                                                                       |       |       |
| M72.6 | Necrotizing fasciitis                                                                          |       |       |
| M73.0 | Gonococcal bursitis                                                                            |       |       |
| M73.1 | Syphilitic bursitis                                                                            |       |       |
| M86*  | Osteomyelitis                                                                                  |       |       |
| M86.0 | Acute haematogenous osteomyelitis                                                              |       |       |
| M86.1 | Other acute osteomyelitis                                                                      | 7300  | 72000 |
| M86.2 | Subacute osteomyelitis                                                                         |       |       |
| M86.3 | Chronic multifocal osteomyelitis                                                               |       |       |
| M86.4 | Chronic osteomyelitis with draining sinus                                                      |       |       |
| M86.5 | Other chronic haematogenous osteomyelitis                                                      |       |       |
| M86.6 | Other chronic osteomyelitis                                                                    | 7301  | 72010 |
| M86.8 | Other osteomyelitis                                                                            |       |       |
| M86.9 | Osteomyelitis, unspecified                                                                     | 7302  | 72029 |
| M86.9 | Osteomyelitis, unspecified                                                                     | 7303  | 72030 |
| M86.9 | Osteomyelitis, unspecified                                                                     | 7309X | 72031 |
| M86.9 | Osteomyelitis, unspecified                                                                     |       | 72039 |
| N08.0 | Glomerular disorders in infectious and parasitic diseases classified elsewhere                 | 5838C |       |
| N10   | Acute tubulo-interstitial nephritis                                                            | 5901A | 59010 |
| N10   | Acute tubulo-interstitial nephritis                                                            |       | 59011 |
| N10   | Acute tubulo-interstitial nephritis                                                            |       | 59012 |
| N13.6 | Pyonephrosis                                                                                   |       | 59013 |
| N13.6 | Pyonephrosis                                                                                   |       | 59014 |
| N15.1 | Renal and perinephric abscess                                                                  | 5902A | 59020 |
| N16.0 | Renal tubulo-interstitial disorders in infectious and parasitic diseases classified elsewhere  |       |       |
| N29.0 | Late syphilis of kidney                                                                        |       |       |
| N29.1 | Other disorders of kidney and ureter in infectious and parasitic diseases classified elsewhere |       |       |
| N30.0 | Acute cystitis                                                                                 | 5950A | 59500 |
| N34.0 | Urethral abscess                                                                               | 5970A |       |
| N39.0 | Urinary tract infection, site not specified                                                    | 5990B | 59902 |
| N41.0 | Acute prostatitis                                                                              | 6010A | 60100 |
| N41.2 | Abscess of prostate                                                                            | 6012A |       |
| N45*  | Orchitis and epididymitis                                                                      |       |       |
| N45.0 | Orchitis, epididymitis and epididymo-orchitis with abscess                                     | 6040A |       |
| N45.9 | Orchitis, epididymitis and epididymo-orchitis without abscess                                  | 6049A | 60400 |
| N45.9 | Orchitis, epididymitis and epididymo-orchitis without abscess                                  | 6049X | 60401 |
| N45.9 | Orchitis, epididymitis and epididymo-orchitis without abscess                                  |       | 60402 |
| N45.9 | Orchitis, epididymitis and epididymo-orchitis without abscess                                  |       | 60403 |
| N61   | Inflammatory disorders of breast                                                               | 6110A | 61100 |
| N61   | Inflammatory disorders of breast                                                               |       | 61101 |
| N70.0 | Acute salpingitis and oophoritis                                                               | 6140  | 61201 |
| N70.0 | Acute salpingitis and oophoritis                                                               |       | 61202 |
| N70.0 | Acute salpingitis and oophoritis                                                               |       | 61207 |

|       |                                                                                                    |       |       |
|-------|----------------------------------------------------------------------------------------------------|-------|-------|
| N70.0 | Acute salpingitis and oophoritis                                                                   |       | 61208 |
| N70.0 | Acute salpingitis and oophoritis                                                                   |       | 61209 |
| N71.0 | Acute inflammatory disease of uterus                                                               | 6150A | 62200 |
| N71.0 | Acute inflammatory disease of uterus                                                               | 6150B |       |
| N73.0 | Acute parametritis and pelvic cellulitis                                                           | 6143A | 61600 |
| N73.0 | Acute parametritis and pelvic cellulitis                                                           |       | 61602 |
| N73.3 | Female acute pelvic peritonitis                                                                    | 6145A |       |
| N74   | Female pelvic inflammatory disorders in diseases classified elsewhere                              |       |       |
| N74.0 | Tuberculous infection of cervix uteri                                                              |       |       |
| N74.1 | Female tuberculous pelvic inflammatory disease                                                     |       |       |
| N74.2 | Female syphilitic pelvic inflammatory disease                                                      |       |       |
| N74.3 | Female gonococcal pelvic inflammatory disease                                                      |       |       |
| N74.4 | Female chlamydial pelvic inflammatory disease                                                      |       |       |
| N74.8 | Female pelvic inflammatory disorders in other diseases classified elsewhere                        |       |       |
| N75.1 | Abscess of Bartholin gland                                                                         | 6163A | 62212 |
| N76.0 | Acute vaginitis                                                                                    |       |       |
| N76.4 | Abscess of vulva                                                                                   | 6164A |       |
| N77.0 | Ulceration of vulva in infectious and parasitic diseases classified elsewhere                      |       |       |
| N77.1 | Vaginitis, vulvitis and vulvovaginitis in infectious and parasitic diseases classified elsewhere   |       |       |
| O03.0 | Spontaneous abortion: Incomplete, complicated by genital tract and pelvic infection                |       |       |
| O03.5 | Spontaneous abortion: Complete or unspecified, complicated by genital tract and pelvic infection   | 6342A | 64300 |
| O03.5 | Spontaneous abortion: Complete or unspecified, complicated by genital tract and pelvic infection   |       | 64320 |
| O04.0 | Medical abortion: Incomplete, complicated by genital tract and pelvic infection                    |       |       |
| O04.5 | Medical abortion: Complete or unspecified, complicated by genital tract and pelvic infection       | 6351A |       |
| O04.5 | Medical abortion: Complete or unspecified, complicated by genital tract and pelvic infection       | 6351B |       |
| O04.5 | Medical abortion: Complete or unspecified, complicated by genital tract and pelvic infection       | 6351C |       |
| O04.5 | Medical abortion: Complete or unspecified, complicated by genital tract and pelvic infection       | 6351D |       |
| O04.5 | Medical abortion: Complete or unspecified, complicated by genital tract and pelvic infection       | 6351X |       |
| O05.0 | Other abortion: Incomplete, complicated by genital tract and pelvic infection                      |       |       |
| O05.5 | Other abortion: Complete or unspecified, complicated by genital tract and pelvic infection         | 6361A |       |
| O06.0 | Unspecified abortion: Incomplete, complicated by genital tract and pelvic infection                |       |       |
| O06.5 | Unspecified abortion: Complete or unspecified, complicated by genital tract and pelvic infection   |       | 64200 |
| O06.5 | Unspecified abortion: Complete or unspecified, complicated by genital tract and pelvic infection   |       | 64220 |
| O06.5 | Unspecified abortion: Complete or unspecified, complicated by genital tract and pelvic infection   |       | 64299 |
| O06.5 | Unspecified abortion: Complete or unspecified, complicated by genital tract and pelvic infection   |       | 64400 |
| O06.5 | Unspecified abortion: Complete or unspecified, complicated by genital tract and pelvic infection   |       | 64420 |
| O07.0 | Failed medical abortion, complicated by genital tract and pelvic infection                         |       |       |
| O07.5 | Other and unspecified failed attempted abortion, complicated by genital tract and pelvic infection | 6381A |       |
| O08.0 | Genital tract and pelvic infection following abortion and ectopic and molar pregnancy              | 6391A | 64590 |
| O08.0 | Genital tract and pelvic infection following abortion and ectopic and molar pregnancy              |       | 63100 |
| O08.0 | Genital tract and pelvic infection following abortion and ectopic and molar pregnancy              |       | 63101 |
| O08.0 | Genital tract and pelvic infection following abortion and ectopic and molar pregnancy              |       | 63110 |
| O08.0 | Genital tract and pelvic infection following abortion and ectopic and molar pregnancy              |       | 63120 |
| O08.0 | Genital tract and pelvic infection following abortion and ectopic and molar pregnancy              |       | 63130 |
| O08.0 | Genital tract and pelvic infection following abortion and ectopic and molar pregnancy              |       | 64591 |
| O23.0 | Infections of kidney in pregnancy                                                                  |       | 63500 |
| O23.0 | Infections of kidney in pregnancy                                                                  |       | 63501 |
| O23.1 | Infections of bladder in pregnancy                                                                 |       | 63590 |
| O23.2 | Infections of urethra in pregnancy                                                                 |       |       |
| O23.3 | Infections of other parts of urinary tract in pregnancy                                            |       |       |



|       |                                                                                                                             |       |       |
|-------|-----------------------------------------------------------------------------------------------------------------------------|-------|-------|
| O23.4 | Unspecified infection of urinary tract in pregnancy                                                                         |       | 63599 |
| O23.5 | Infections of the genital tract in pregnancy                                                                                |       | 63000 |
| O23.5 | Infections of the genital tract in pregnancy                                                                                |       | 63001 |
| O23.5 | Infections of the genital tract in pregnancy                                                                                |       | 63002 |
| O23.5 | Infections of the genital tract in pregnancy                                                                                |       | 63003 |
| O23.5 | Infections of the genital tract in pregnancy                                                                                |       | 63008 |
| O23.5 | Infections of the genital tract in pregnancy                                                                                |       | 63009 |
| O23.9 | Other and unspecified genitourinary tract infection in pregnancy                                                            | 6466A |       |
| O75.3 | Other infection during labour                                                                                               |       |       |
| O85   | Puerperal sepsis                                                                                                            | 670   | 670   |
| O86*  | Other puerperal infections                                                                                                  |       |       |
| O91.0 | Infection of nipple associated with childbirth                                                                              | 6750A |       |
| O91.1 | Abscess of breast associated with childbirth                                                                                | 6751A | 67802 |
| O98   | Maternal infectious and parasitic diseases classifiable elsewhere but complicating pregnancy, childbirth and the puerperium |       |       |
| O98.0 | Tuberculosis complicating pregnancy, childbirth and the puerperium                                                          | 6473A |       |
| O98.1 | Syphilis complicating pregnancy, childbirth and the puerperium                                                              | 6470A |       |
| O98.2 | Gonorrhoea complicating pregnancy, childbirth and the puerperium                                                            | 6471A |       |
| O98.3 | Other infections with a predominantly sexual mode of transmission complicating pregnancy, childbirth and the puerperium     | 6472X |       |
| O98.4 | Viral hepatitis complicating pregnancy, childbirth and the puerperium                                                       |       |       |
| O98.5 | Other viral diseases complicating pregnancy, childbirth and the puerperium                                                  | 6475A |       |
| O98.5 | Other viral diseases complicating pregnancy, childbirth and the puerperium                                                  | 6476A |       |
| O98.6 | Protozoal diseases complicating pregnancy, childbirth and the puerperium                                                    |       |       |
| O98.7 | Human immunodeficiency virus [HIV] disease complicating pregnancy, childbirth and the puerperium                            |       |       |
| O98.8 | Other maternal infectious and parasitic diseases complicating pregnancy, childbirth and the puerperium                      | 6474A |       |
| O98.8 | Other maternal infectious and parasitic diseases complicating pregnancy, childbirth and the puerperium                      | 6478X |       |
| O98.9 | Unspecified maternal infectious or parasitic disease complicating pregnancy, childbirth and the puerperium                  | 6479X |       |
| P23   | Congenital pneumonia                                                                                                        | 7700A |       |
| P23.0 | Congenital pneumonia due to viral agent                                                                                     |       |       |
| P23.1 | Congenital pneumonia due to Chlamydia                                                                                       |       |       |
| P23.2 | Congenital pneumonia due to staphylococcus                                                                                  |       |       |
| P23.3 | Congenital pneumonia due to streptococcus, group B                                                                          |       |       |
| P23.4 | Congenital pneumonia due to Escherichia coli                                                                                |       |       |
| P23.5 | Congenital pneumonia due to Pseudomonas                                                                                     |       |       |
| P23.6 | Congenital pneumonia due to other bacterial agents                                                                          |       |       |
| P23.8 | Congenital pneumonia due to other organisms                                                                                 |       |       |
| P23.9 | Congenital pneumonia, unspecified                                                                                           |       |       |
| P35.0 | Congenital rubella syndrome                                                                                                 | 7710A |       |
| P35.1 | Congenital cytomegalovirus infection                                                                                        | 7711A | 07950 |
| P35.2 | Congenital herpesviral [herpes simplex] infection                                                                           | 7712A |       |
| P35.3 | Congenital viral hepatitis                                                                                                  |       |       |
| P36   | Bacterial sepsis of newborn                                                                                                 |       |       |
| P36.0 | Sepsis of newborn due to streptococcus, group B                                                                             |       |       |
| P36.1 | Sepsis of newborn due to other and unspecified streptococci                                                                 |       |       |
| P36.2 | Sepsis of newborn due to Staphylococcus aureus                                                                              |       |       |
| P36.3 | Sepsis of newborn due to other and unspecified staphylococci                                                                |       |       |
| P36.4 | Sepsis of newborn due to Escherichia coli                                                                                   |       |       |
| P36.5 | Sepsis of newborn due to anaerobes                                                                                          |       |       |
| P36.8 | Other bacterial sepsis of newborn                                                                                           |       |       |

|       |                                                                                    |       |       |
|-------|------------------------------------------------------------------------------------|-------|-------|
| P36.9 | Bacterial sepsis of newborn, unspecified                                           | 7718A |       |
| P37   | Other congenital infectious and parasitic diseases                                 |       |       |
| P37.0 | Congenital tuberculosis                                                            |       |       |
| P37.1 | Congenital toxoplasmosis                                                           | 7712C | 13010 |
| P37.1 | Congenital toxoplasmosis                                                           |       | 13020 |
| P37.2 | Neonatal (disseminated) listeriosis                                                | 7712B | 02700 |
| P37.3 | Congenital falciparum malaria                                                      |       |       |
| P37.4 | Other congenital malaria                                                           |       |       |
| P37.5 | Neonatal candidiasis                                                               | 7717A |       |
| P37.8 | Other specified congenital infectious and parasitic diseases                       |       |       |
| P37.9 | Congenital infectious and parasitic disease, unspecified                           | 7712X |       |
| P38   | Omphalitis of newborn with or without mild haemorrhage                             | 7714A |       |
| P39   | Other infections specific to the perinatal period                                  |       |       |
| P39.0 | Neonatal infective mastitis                                                        | 7715A | 77890 |
| P39.1 | Neonatal conjunctivitis and dacryocystitis                                         | 7716A |       |
| P39.2 | Intra-amniotic infection of fetus, not elsewhere classified                        |       |       |
| P39.3 | Neonatal urinary tract infection                                                   | 7718B |       |
| P39.4 | Neonatal skin infection                                                            |       |       |
| P39.8 | Other specified infections specific to the perinatal period                        | 7718C |       |
| P39.9 | Infection specific to the perinatal period, unspecified                            | 7718X |       |
| R57.2 | Septic shock                                                                       | 7855B |       |
| R65.0 | Systemic Inflammatory Response Syndrome of infectious origin without organ failure |       |       |
| R65.1 | Systemic Inflammatory Response Syndrome of infectious origin with organ failure    |       |       |
| Z21   | Asymptomatic human immunodeficiency virus [HIV] infection status                   |       |       |

The diagnosis codes are from the Finnish national editions of the International Classification of Diseases, 8th, 9th, and 10th Revisions (ICD-8, ICD-9, and ICD-10)<sup>2-4</sup> and from the UK Biobank showcase (<https://biobank.ndph.ox.ac.uk/showcase/field.cgi?id=41271>). ICD-10 disease names are from: World Health Organization. International Statistical Classification of Diseases and Related Health Problems 10th Revision [Internet]. ICD-10 Version:2016. [cited 2 Oct 2018]. Available from: <https://icd.who.int/browse10/2016/en>

**eTable 7. Distribution of all infections in primary analysis (Finnish multicohort sample)**

| ICD-10 code and description             | N      | %     |
|-----------------------------------------|--------|-------|
| K35 Acute appendicitis                  | 11 865 | 15.39 |
| J18.9 Pneumonia, unspecified            | 6062   | 7.86  |
| A09 Other gastroenteritis and colitis.. | 5608   | 7.27  |
| N10 Acute tubulo-interstitial nephritis | 3599   | 4.67  |
| J03.9 Acute tonsillitis, unspecified    | 3084   | 4.00  |
| A46 Erysipelas                          | 3082   | 4.00  |
| J36 Peritonsillar abscess               | 3035   | 3.94  |
| J15.9 Bacterial pneumonia, unspecified  | 2228   | 2.89  |
| N70.0 Acute salpingitis and oophoritis  | 1957   | 2.54  |
| O85 Puerperal sepsis                    | 1731   | 2.24  |
| J20.9 Acute bronchitis, unspecified     | 1149   | 1.49  |
| N39.0 Urinary tract infection, site n.. | 1055   | 1.37  |
| J01.0 Acute maxillary sinusitis         | 1038   | 1.35  |
| A49.9 Bacterial infection, unspecified  | 1026   | 1.33  |
| J03.0 Streptococcal tonsillitis         | 919    | 1.19  |
| A63.0 Anogenital (venereal) warts       | 843    | 1.09  |
| A08.4 Viral intestinal infection, uns.. | 817    | 1.06  |
| J22 Unspecified acute lower respirato.. | 777    | 1.01  |
| N71.0 Acute inflammatory disease of u.. | 719    | 0.93  |
| J02.9 Acute pharyngitis, unspecified    | 695    | 0.90  |
| J04.0 Acute laryngitis                  | 677    | 0.88  |
| B34.9 Viral infection, unspecified      | 619    | 0.80  |
| A98.5 Haemorrhagic fever with renal s.. | 577    | 0.75  |
| A08.5 Other specified intestinal infe.. | 487    | 0.63  |
| K57.2 Diverticular disease of large i.. | 456    | 0.59  |
| J18.0 Bronchopneumonia, unspecified     | 441    | 0.57  |
| N30.0 Acute cystitis                    | 440    | 0.57  |
| B27.0 Gammaherpesviral mononucleosis    | 415    | 0.54  |
| A41.5 Sepsis due to other Gram-negati.. | 409    | 0.53  |
| L05.9 Pilonidal cyst without abscess    | 389    | 0.50  |
| O08.0 Genital tract and pelvic infect.. | 375    | 0.49  |
| O03.5 Spontaneous abortion: Complete .. | 365    | 0.47  |
| B27.9 Infectious mononucleosis, unspe.. | 362    | 0.47  |
| K61.0 Anal abscess                      | 330    | 0.43  |
| K05.3 Chronic periodontitis             | 327    | 0.42  |
| A04.7 Enterocolitis due to Clostridiu.. | 306    | 0.40  |
| N75.1 Abscess of Bartholin gland        | 297    | 0.39  |
| H66.0 Acute suppurative otitis media    | 290    | 0.38  |
| J11.1 Influenza with other respirator.. | 286    | 0.37  |
| A41.9 Sepsis, unspecified               | 278    | 0.36  |
| B06.9 Rubella without complication      | 277    | 0.36  |
| J13 Pneumonia due to Streptococcus pn.. | 273    | 0.35  |
| K04.7 Periapical abscess without sinus  | 264    | 0.34  |
| B01.9 Varicella without complication    | 255    | 0.33  |
| J11.8 Influenza with other manifestat.. | 255    | 0.33  |

|                                         |     |      |
|-----------------------------------------|-----|------|
| N61 Inflammatory disorders of breast    | 253 | 0.33 |
| A69.2 Lyme disease                      | 229 | 0.30 |
| L04 Acute lymphadenitis                 | 225 | 0.29 |
| M00.9 Pyogenic arthritis, unspecified   | 213 | 0.28 |
| N45.9 Orchitis, epididymitis and epid.. | 209 | 0.27 |
| J10.1 Influenza with other respirator.. | 206 | 0.27 |
| B99 Other and unspecified infectious .. | 199 | 0.26 |
| L03.0 Cellulitis of finger and toe      | 196 | 0.25 |
| A04.5 Campylobacter enteritis           | 194 | 0.25 |
| K04.5 Chronic apical periodontitis      | 192 | 0.25 |
| A87.9 Viral meningitis, unspecified     | 181 | 0.23 |
| K65.0 Acute peritonitis                 | 180 | 0.23 |
| A60.0 Herpesviral infection of genita.. | 177 | 0.23 |
| K61 Abscess of anal and rectal regions  | 175 | 0.23 |
| O23.0 Infections of kidney in pregnancy | 175 | 0.23 |
| O23.5 Infections of the genital tract.. | 175 | 0.23 |
| K12.2 Cellulitis and abscess of mouth   | 174 | 0.23 |
| B18.2 Chronic viral hepatitis C         | 173 | 0.22 |
| J05.1 Acute epiglottitis                | 169 | 0.22 |
| O03.0 Spontaneous abortion: Incomplet.. | 168 | 0.22 |
| A41.0 Sepsis due to Staphylococcus au.. | 165 | 0.21 |
| L02 Cutaneous abscess, furuncle and c.. | 165 | 0.21 |
| K02.1 Caries of dentine                 | 163 | 0.21 |
| O86.0 Infection of obstetric surgical.. | 162 | 0.21 |
| L08.9 Local infection of skin and sub.. | 158 | 0.20 |
| O23.9 Other and unspecified genitouri.. | 158 | 0.20 |
| A02.0 Salmonella enteritis              | 153 | 0.20 |
| J15.8 Other bacterial pneumonia         | 147 | 0.19 |
| L02.4 Cutaneous abscess, furuncle and.. | 146 | 0.19 |
| B19.9 Unspecified viral hepatitis wit.. | 142 | 0.18 |
| A41.8 Other specified sepsis            | 140 | 0.18 |
| J12 Viral pneumonia, not elsewhere cl.. | 140 | 0.18 |
| A16.2 Tuberculosis of lung, without m.. | 135 | 0.18 |
| A89 Unspecified viral infection of ce.. | 134 | 0.17 |
| B07 Viral warts                         | 134 | 0.17 |
| O86.1 Other infection of genital trac.. | 130 | 0.17 |
| A87.0 Enteroviral meningitis            | 129 | 0.17 |
| B86 Scabies                             | 125 | 0.16 |
| G00.9 Bacterial meningitis, unspecified | 124 | 0.16 |
| L05.0 Pilonidal cyst with abscess       | 123 | 0.16 |
| O86.4 Pyrexia of unknown origin follo.. | 120 | 0.16 |
| K05.2 Acute periodontitis               | 115 | 0.15 |
| J18.1 Lobar pneumonia, unspecified      | 112 | 0.15 |
| A40.3 Sepsis due to Streptococcus pne.. | 111 | 0.14 |
| A02 Other salmonella infections         | 109 | 0.14 |
| K02 Dental caries                       | 104 | 0.13 |
| A86 Unspecified viral encephalitis      | 103 | 0.13 |
| B35 Dermatophytosis                     | 101 | 0.13 |

|                                         |     |      |
|-----------------------------------------|-----|------|
| B02.9 Zoster without complication       | 100 | 0.13 |
| B97.8 Other viral agents as the cause.. | 100 | 0.13 |
| L04.0 Acute lymphadenitis of face, he.. | 100 | 0.13 |
| A56.1 Chlamydial infection of pelvipe.. | 99  | 0.13 |
| L03.1 Cellulitis of other parts of limb | 97  | 0.13 |
| J15.7 Pneumonia due to Mycoplasma pne.. | 92  | 0.12 |
| O23.4 Unspecified infection of urinar.. | 92  | 0.12 |
| O04.0 Medical abortion: Incomplete, c.. | 89  | 0.12 |
| L02.2 Cutaneous abscess, furuncle and.. | 88  | 0.11 |
| B05.9 Measles without complication      | 86  | 0.11 |
| A49.8 Other bacterial infections of u.. | 85  | 0.11 |
| O23.1 Infections of bladder in pregna.. | 84  | 0.11 |
| A04.9 Bacterial intestinal infection,.. | 81  | 0.11 |
| H00.1 Chalazion                         | 79  | 0.10 |
| L02.3 Cutaneous abscess, furuncle and.. | 79  | 0.10 |
| B00.1 Herpesviral vesicular dermatitis  | 78  | 0.10 |
| B08.2 Exanthema subitum [sixth disease] | 78  | 0.10 |
| H10.0 Mucopurulent conjunctivitis       | 78  | 0.10 |
| J86.9 Pyothorax without fistula         | 78  | 0.10 |
| A15.0 Tuberculosis of lung, confirmed.. | 77  | 0.10 |
| A95 Yellow fever                        | 76  | 0.10 |
| B34.8 Other viral infections of unspe.. | 76  | 0.10 |
| J16.8 Pneumonia due to other specifie.. | 76  | 0.10 |
| M71.1 Other infective bursitis          | 75  | 0.10 |
| O86.2 Urinary tract infection followi.. | 74  | 0.10 |
| A54.9 Gonococcal infection, unspecified | 73  | 0.09 |
| L03.9 Cellulitis, unspecified           | 73  | 0.09 |
| I33.0 Acute and subacute infective en.. | 71  | 0.09 |
| N41.0 Acute prostatitis                 | 71  | 0.09 |
| A08.3 Other viral enteritis             | 70  | 0.09 |
| H60.3 Other infective otitis externa    | 70  | 0.09 |
| L08.8 Other specified local infection.. | 70  | 0.09 |
| M86.9 Osteomyelitis, unspecified        | 68  | 0.09 |
| N76.4 Abscess of vulva                  | 68  | 0.09 |
| B26.2 Mumps encephalitis                | 67  | 0.09 |
| G03.9 Meningitis, unspecified           | 67  | 0.09 |
| J39.0 Retropharyngeal and parapharyng.. | 66  | 0.09 |
| K57.0 Diverticular disease of small i.. | 65  | 0.08 |
| O04.5 Medical abortion: Complete or u.. | 65  | 0.08 |
| K04.6 Periapical abscess with sinus     | 63  | 0.08 |
| J09 Influenza due to certain identifi.. | 62  | 0.08 |
| M86.1 Other acute osteomyelitis         | 62  | 0.08 |
| B00.2 Herpesviral gingivostomatitis a.. | 61  | 0.08 |
| B37 Candidiasis                         | 61  | 0.08 |
| O75.3 Other infection during labour     | 61  | 0.08 |
| O86.8 Other specified puerperal infec.. | 60  | 0.08 |
| O98.8 Other maternal infectious and p.. | 60  | 0.08 |
| A04.8 Other specified bacterial intes.. | 58  | 0.08 |

|                                         |    |      |
|-----------------------------------------|----|------|
| J10.0 Influenza with pneumonia, other.. | 58 | 0.08 |
| N77.1 Vaginitis, vulvitis and vulvova.. | 57 | 0.07 |
| H62.0 Otitis externa in bacterial dis.. | 56 | 0.07 |
| A54.2 Gonococcal pelviperitonitis and.. | 55 | 0.07 |
| A74.9 Chlamydial infection, unspecified | 54 | 0.07 |
| B09 Unspecified viral infection chara.. | 54 | 0.07 |
| L02.1 Cutaneous abscess, furuncle and.. | 54 | 0.07 |
| B00.0 Eczema herpeticum                 | 53 | 0.07 |
| L02.9 Cutaneous abscess, furuncle and.. | 52 | 0.07 |
| O91.1 Abscess of breast associated wi.. | 50 | 0.06 |
| A38 Scarlet fever                       | 48 | 0.06 |
| N73.3 Female acute pelvic peritonitis   | 47 | 0.06 |
| H00.0 Hordeolum and other deep inflam.. | 46 | 0.06 |
| A40.8 Other streptococcal sepsis        | 45 | 0.06 |
| H05.0 Acute inflammation of orbit       | 44 | 0.06 |
| O98.5 Other viral diseases complicati.. | 43 | 0.06 |
| A56.0 Chlamydial infection of lower g.. | 42 | 0.05 |
| B08.1 Molluscum contagiosum             | 41 | 0.05 |
| A18.2 Tuberculous peripheral lymphade.. | 40 | 0.05 |
| G00.8 Other bacterial meningitis        | 40 | 0.05 |
| J11.0 Influenza with pneumonia, virus.. | 40 | 0.05 |
| J20.0 Acute bronchitis due to Mycopla.. | 40 | 0.05 |
| A40.9 Streptococcal sepsis, unspecified | 39 | 0.05 |
| B15.9 Hepatitis A without hepatic coma  | 39 | 0.05 |
| A40.0 Sepsis due to streptococcus, gr.. | 38 | 0.05 |
| I40.0 Infective myocarditis             | 38 | 0.05 |
| J02.0 Streptococcal pharyngitis         | 38 | 0.05 |
| L02.0 Cutaneous abscess, furuncle and.. | 38 | 0.05 |
| A08.0 Rotaviral enteritis               | 37 | 0.05 |
| J18.8 Other pneumonia, organism unspe.. | 37 | 0.05 |
| K61.1 Rectal abscess                    | 37 | 0.05 |
| L03.2 Cellulitis of face                | 37 | 0.05 |
| O98.3 Other infections with a predomi.. | 37 | 0.05 |
| A41.1 Sepsis due to other specified s.. | 36 | 0.05 |
| J12.9 Viral pneumonia, unspecified      | 36 | 0.05 |
| L08.0 Pyoderma                          | 36 | 0.05 |
| A49.0 Staphylococcal infection, unspe.. | 35 | 0.05 |
| B02.8 Zoster with other complications   | 35 | 0.05 |
| B85 Pediculosis and phthiriasis         | 35 | 0.05 |
| J04.2 Acute laryngotracheitis           | 35 | 0.05 |
| L02.8 Cutaneous abscess, furuncle and.. | 35 | 0.05 |
| B00.5 Herpesviral ocular disease        | 34 | 0.04 |
| B97.7 Papillomavirus as the cause of .. | 34 | 0.04 |
| K02.9 Dental caries, unspecified        | 34 | 0.04 |
| B01.1 Varicella encephalitis            | 33 | 0.04 |
| B33.8 Other specified viral diseases    | 33 | 0.04 |
| M71.0 Abscess of bursa                  | 33 | 0.04 |
| A04.6 Enteritis due to Yersinia enter.. | 32 | 0.04 |

|                                         |    |      |
|-----------------------------------------|----|------|
| B01.8 Varicella with other complicati.. | 31 | 0.04 |
| H70.0 Acute mastoiditis                 | 31 | 0.04 |
| M86.6 Other chronic osteomyelitis       | 31 | 0.04 |
| A02.1 Salmonella sepsis                 | 30 | 0.04 |
| A16.5 Tuberculous pleurisy, without m.. | 30 | 0.04 |
| H60.1 Cellulitis of external ear        | 30 | 0.04 |
| A39.0 Meningococcal meningitis          | 29 | 0.04 |
| A59.0 Urogenital trichomoniasis         | 29 | 0.04 |
| G00.0 Haemophilus meningitis            | 29 | 0.04 |
| G05.1 Encephalitis, myelitis and ence.. | 29 | 0.04 |
| H60.0 Abscess of external ear           | 28 | 0.04 |
| N73.0 Acute parametritis and pelvic c.. | 28 | 0.04 |
| J85.2 Abscess of lung without pneumonia | 27 | 0.04 |
| A37 Whooping cough                      | 26 | 0.03 |
| B16.9 Acute hepatitis B without delta.. | 26 | 0.03 |
| B18.1 Chronic viral hepatitis B witho.. | 26 | 0.03 |
| J10.8 Influenza with other manifestat.. | 26 | 0.03 |
| A05.9 Bacterial foodborne intoxicatio.. | 25 | 0.03 |
| A41.2 Sepsis due to unspecified staph.. | 25 | 0.03 |
| J86.0 Pyothorax with fistula            | 24 | 0.03 |
| K63.0 Abscess of intestine              | 24 | 0.03 |
| K75.0 Abscess of liver                  | 23 | 0.03 |
| M00.0 Staphylococcal arthritis and po.. | 23 | 0.03 |
| H44.0 Purulent endophthalmitis          | 22 | 0.03 |
| I30.1 Infective pericarditis            | 22 | 0.03 |
| J21.9 Acute bronchiolitis, unspecified  | 22 | 0.03 |
| O86.3 Other genitourinary tract infec.. | 22 | 0.03 |
| O98.9 Unspecified maternal infectious.. | 22 | 0.03 |
| B02.3 Zoster ocular disease             | 21 | 0.03 |
| K11.3 Abscess of salivary gland         | 21 | 0.03 |
| M65.0 Abscess of tendon sheath          | 21 | 0.03 |
| A18.0 Tuberculosis of bones and joints  | 20 | 0.03 |
| A21.9 Tularaemia, unspecified           | 20 | 0.03 |
| A54.1 Gonococcal infection of lower g.. | 20 | 0.03 |
| B34.0 Adenovirus infection, unspecifi.. | 20 | 0.03 |
| G02.0 Meningitis in viral diseases cl.. | 20 | 0.03 |
| G06.0 Intracranial abscess and granul.. | 20 | 0.03 |
| K61.2 Anorectal abscess                 | 20 | 0.03 |
| L03.3 Cellulitis of trunk               | 20 | 0.03 |
| A21.0 Ulceroglandular tularaemia        | 19 | 0.02 |
| B50.9 Plasmodium falciparum malaria, .. | 19 | 0.02 |
| G00.1 Pneumococcal meningitis           | 19 | 0.02 |
| N76.0 Acute vaginitis                   | 19 | 0.02 |
| A80 Acute poliomyelitis                 | 18 | 0.02 |
| J04.1 Acute tracheitis                  | 18 | 0.02 |
| J17.3 Pneumonia in parasitic diseases   | 18 | 0.02 |
| K04.4 Acute apical periodontitis of p.. | 18 | 0.02 |
| B01 Varicella [chickenpox]              | 17 | 0.02 |

|                                         |    |      |
|-----------------------------------------|----|------|
| B25.8 Other cytomegaloviral diseases    | 17 | 0.02 |
| B25.9 Cytomegaloviral disease, unspec.. | 17 | 0.02 |
| B26.9 Mumps without complication        | 17 | 0.02 |
| G01 Meningitis in bacterial diseases .. | 17 | 0.02 |
| I42.1 Obstructive hypertrophic cardio.. | 17 | 0.02 |
| N15.1 Renal and perinephric abscess     | 17 | 0.02 |
| N74.4 Female chlamydial pelvic inflam.. | 17 | 0.02 |
| A07 Other protozoal intestinal diseases | 16 | 0.02 |
| A41.4 Sepsis due to anaerobes           | 16 | 0.02 |
| A48.8 Other specified bacterial disea.. | 16 | 0.02 |
| A88.8 Other specified viral infection.. | 16 | 0.02 |
| B17.1 Acute hepatitis C                 | 16 | 0.02 |
| B23.1 HIV disease resulting in (persi.. | 16 | 0.02 |
| B37.3 Candidiasis of vulva and vagina   | 16 | 0.02 |
| J86 Pyothorax                           | 16 | 0.02 |
| O98.4 Viral hepatitis complicating pr.. | 16 | 0.02 |
| A15.1 Tuberculosis of lung, confirmed.. | 15 | 0.02 |
| A40.1 Sepsis due to streptococcus, gr.. | 15 | 0.02 |
| B27.1 Cytomegaloviral mononucleosis     | 15 | 0.02 |
| B37.7 Candidal sepsis                   | 15 | 0.02 |
| B58.9 Toxoplasmosis, unspecified        | 15 | 0.02 |
| L01.0 Impetigo [any organism] [any si.. | 15 | 0.02 |
| M46.3 Infection of intervertebral dis.. | 15 | 0.02 |
| N45.0 Orchitis, epididymitis and epid.. | 15 | 0.02 |
| A51.0 Primary genital syphilis          | 14 | 0.02 |
| B37.8 Candidiasis of other sites        | 14 | 0.02 |
| K57.4 Diverticular disease of both sm.. | 14 | 0.02 |
| O91.0 Infection of nipple associated .. | 14 | 0.02 |
| A02.9 Salmonella infection, unspecified | 13 | 0.02 |
| A03.3 Shigellosis due to Shigella son.. | 13 | 0.02 |
| A51.3 Secondary syphilis of skin and .. | 13 | 0.02 |
| B35.1 Tinea unguium                     | 13 | 0.02 |
| B59 Pneumocystosis                      | 13 | 0.02 |
| B97.0 Adenovirus as the cause of dise.. | 13 | 0.02 |
| J03.8 Acute tonsillitis due to other .. | 13 | 0.02 |
| L03.8 Cellulitis of other sites         | 13 | 0.02 |
| N34.0 Urethral abscess                  | 13 | 0.02 |
| B00.8 Other forms of herpesviral infe.. | 12 | 0.02 |
| B00.9 Herpesviral infection, unspecif.. | 12 | 0.02 |
| B24 Unspecified human immunodeficienc.. | 12 | 0.02 |
| B30 Viral conjunctivitis                | 12 | 0.02 |
| B37.0 Candidal stomatitis               | 12 | 0.02 |
| B70.0 Diphyllbothriasis                 | 12 | 0.02 |
| J85.1 Abscess of lung with pneumonia    | 12 | 0.02 |
| L70.1 Acne conglobata                   | 12 | 0.02 |
| M60.0 Infective myositis                | 12 | 0.02 |
| O06.5 Unspecified abortion: Complete .. | 12 | 0.02 |
| A01.4 Paratyphoid fever, unspecified    | 11 | 0.01 |



|                                         |    |      |
|-----------------------------------------|----|------|
| A64 Unspecified sexually transmitted .. | 11 | 0.01 |
| B06 Rubella [German measles]            | 11 | 0.01 |
| B26.0 Mumps orchitis                    | 11 | 0.01 |
| B34.1 Enterovirus infection, unspecif.. | 11 | 0.01 |
| G06.1 Intrapinal abscess and granuloma  | 11 | 0.01 |
| L01 Impetigo                            | 11 | 0.01 |
| L04.9 Acute lymphadenitis, unspecified  | 11 | 0.01 |
| A01.2 Paratyphoid fever B               | 10 | 0.01 |
| A03.1 Shigellosis due to Shigella fle.. | 10 | 0.01 |
| A39.2 Acute meningococcaemia            | 10 | 0.01 |
| B54 Unspecified malaria                 | 10 | 0.01 |
| B58.0 Toxoplasma oculopathy             | 10 | 0.01 |
| J14 Pneumonia due to Haemophilus infl.. | 10 | 0.01 |
| J16.0 Chlamydial pneumonia              | 10 | 0.01 |
| J20.5 Acute bronchitis due to respira.. | 10 | 0.01 |
| K61.3 Ischiorectal abscess              | 10 | 0.01 |
| L01.1 Impetiginization of other derma.. | 10 | 0.01 |
| M46.2 Osteomyelitis of vertebra         | 10 | 0.01 |
| N13.6 Pyonephrosis                      | 10 | 0.01 |
| A06.9 Amoebiasis, unspecified           | 9  | 0.01 |
| A63.8 Other specified predominantly s.. | 9  | 0.01 |
| A90 Dengue fever [classical dengue]     | 9  | 0.01 |
| B00.7 Disseminated herpesviral disease  | 9  | 0.01 |
| B08.8 Other specified viral infection.. | 9  | 0.01 |
| B33.2 Viral carditis                    | 9  | 0.01 |
| K77.0 Liver disorders in infectious a.. | 9  | 0.01 |
| M00.2 Other streptococcal arthritis a.. | 9  | 0.01 |
| A02.2 Localized salmonella infections   | 8  | 0.01 |
| A02.8 Other specified salmonella infe.. | 8  | 0.01 |
| A15.6 Tuberculous pleurisy, confirmed.. | 8  | 0.01 |
| A16.0 Tuberculosis of lung, bacteriol.. | 8  | 0.01 |
| A16.9 Respiratory tuberculosis unspec.. | 8  | 0.01 |
| A18.1 Tuberculosis of genitourinary s.. | 8  | 0.01 |
| A32.8 Other forms of listeriosis        | 8  | 0.01 |
| A39.4 Meningococcaemia, unspecified     | 8  | 0.01 |
| A49.1 Streptococcal infection, unspec.. | 8  | 0.01 |
| A87.8 Other viral meningitis            | 8  | 0.01 |
| B00.4 Herpesviral encephalitis          | 8  | 0.01 |
| B05.8 Measles with other complications  | 8  | 0.01 |
| B26.3 Mumps pancreatitis                | 8  | 0.01 |
| B53.0 Plasmodium ovale malaria          | 8  | 0.01 |
| J20.8 Acute bronchitis due to other s.. | 8  | 0.01 |
| J39.1 Other abscess of pharynx          | 8  | 0.01 |
| M01.2 Arthritis in Lyme disease         | 8  | 0.01 |
| O07.0 Failed medical abortion, compli.. | 8  | 0.01 |
| O07.5 Other and unspecified failed at.. | 8  | 0.01 |
| A01.0 Typhoid fever                     | 7  | 0.01 |
| A31.0 Pulmonary mycobacterial infection | 7  | 0.01 |

|                                         |   |      |
|-----------------------------------------|---|------|
| A84.8 Other tick-borne viral encephal.. | 7 | 0.01 |
| B02.0 Zoster encephalitis               | 7 | 0.01 |
| B02.2 Zoster with other nervous syste.. | 7 | 0.01 |
| B36 Other superficial mycoses           | 7 | 0.01 |
| B80 Enterobiasis                        | 7 | 0.01 |
| J20.1 Acute bronchitis due to Haemoph.. | 7 | 0.01 |
| K02.8 Other dental caries               | 7 | 0.01 |
| N08.0 Glomerular disorders in infecti.. | 7 | 0.01 |
| O05.0 Other abortion: Incomplete, com.. | 7 | 0.01 |
| O05.5 Other abortion: Complete or uns.. | 7 | 0.01 |
| Z21 Asymptomatic human immunodeficien.. | 7 | 0.01 |
| A04.3 Enterohaemorrhagic Escherichia .. | 6 | 0.01 |
| A08.1 Acute gastroenteropathy due to .. | 6 | 0.01 |
| A08.2 Adenoviral enteritis              | 6 | 0.01 |
| A18.3 Tuberculosis of intestines, per.. | 6 | 0.01 |
| A48.0 Gas gangrene                      | 6 | 0.01 |
| A54.0 Gonococcal infection of lower g.. | 6 | 0.01 |
| A74.8 Other chlamydial diseases         | 6 | 0.01 |
| B02.1 Zoster meningitis                 | 6 | 0.01 |
| B08.3 Erythema infectiosum [fifth dis.. | 6 | 0.01 |
| B18.9 Chronic viral hepatitis, unspec.. | 6 | 0.01 |
| B25.1 Cytomegaloviral hepatitis         | 6 | 0.01 |
| B35.3 Tinea pedis                       | 6 | 0.01 |
| B51.9 Plasmodium vivax malaria withou.. | 6 | 0.01 |
| B67 Echinococcosis                      | 6 | 0.01 |
| H10.5 Blepharconjunctivitis             | 6 | 0.01 |
| J21.0 Acute bronchiolitis due to resp.. | 6 | 0.01 |
| J85.3 Abscess of mediastinum            | 6 | 0.01 |
| K05.0 Acute gingivitis                  | 6 | 0.01 |
| M65.1 Other infective (teno)synovitis   | 6 | 0.01 |
| N77.0 Ulceration of vulva in infectio.. | 6 | 0.01 |
| O06.0 Unspecified abortion: Incomplet.. | 6 | 0.01 |
| A03.9 Shigellosis, unspecified          | 5 | 0.01 |
| A06.0 Acute amoebic dysentery           | 5 | 0.01 |
| A15.2 Tuberculosis of lung, confirmed.. | 5 | 0.01 |
| A31 Infection due to other mycobacteria | 5 | 0.01 |
| A31.9 Mycobacterial infection, unspec.. | 5 | 0.01 |
| A32.7 Listerial sepsis                  | 5 | 0.01 |
| A52.1 Symptomatic neurosyphilis         | 5 | 0.01 |
| A60.9 Anogenital herpesviral infectio.. | 5 | 0.01 |
| A84.9 Tick-borne viral encephalitis, .. | 5 | 0.01 |
| B01.2 Varicella pneumonia               | 5 | 0.01 |
| B02.7 Disseminated zoster               | 5 | 0.01 |
| B08.5 Enteroviral vesicular pharyngitis | 5 | 0.01 |
| B19.0 Unspecified viral hepatitis wit.. | 5 | 0.01 |
| B37.4 Candidiasis of other urogenital.. | 5 | 0.01 |
| B74 Filariasis                          | 5 | 0.01 |
| B77.9 Ascariasis, unspecified           | 5 | 0.01 |

|                                         |    |       |
|-----------------------------------------|----|-------|
| B95.8 Unspecified staphylococcus as t.. | 5  | 0.01  |
| B97.1 Enterovirus as the cause of dis.. | 5  | 0.01  |
| G03.8 Meningitis due to other specifi.. | 5  | 0.01  |
| H19.1 Herpesviral keratitis and kerat.. | 5  | 0.01  |
| H19.2 Keratitis and keratoconjunctivi.. | 5  | 0.01  |
| H62.1 Otitis externa in viral disease.. | 5  | 0.01  |
| J12.1 Respiratory syncytial virus pne.. | 5  | 0.01  |
| J15.2 Pneumonia due to staphylococcus   | 5  | 0.01  |
| K57.8 Diverticular disease of intesti.. | 5  | 0.01  |
| L04.2 Acute lymphadenitis of upper limb | 5  | 0.01  |
| L04.8 Acute lymphadenitis of other si.. | 5  | 0.01  |
| M86.0 Acute haematogenous osteomyelitis | 5  | 0.01  |
| M86.2 Subacute osteomyelitis            | 5  | 0.01  |
| A00.9 Cholera, unspecified              | <5 | <0.01 |
| A01.1 Paratyphoid fever A               | <5 | <0.01 |
| A01.3 Paratyphoid fever C               | <5 | <0.01 |
| A03 Shigellosis                         | <5 | <0.01 |
| A03.0 Shigellosis due to Shigella dys.. | <5 | <0.01 |
| A03.2 Shigellosis due to Shigella boy.. | <5 | <0.01 |
| A04.0 Enteropathogenic Escherichia co.. | <5 | <0.01 |
| A04.2 Enteroinvasive Escherichia coli.. | <5 | <0.01 |
| A04.4 Other intestinal Escherichia co.. | <5 | <0.01 |
| A05.0 Foodborne staphylococcal intoxi.. | <5 | <0.01 |
| A05.1 Botulism                          | <5 | <0.01 |
| A05.2 Foodborne Clostridium perfringe.. | <5 | <0.01 |
| A05.8 Other specified bacterial foodb.. | <5 | <0.01 |
| A06.2 Amoebic nondysenteric colitis     | <5 | <0.01 |
| A06.4 Amoebic liver abscess             | <5 | <0.01 |
| A06.5 Amoebic lung abscess              | <5 | <0.01 |
| A06.8 Amoebic infection of other sites  | <5 | <0.01 |
| A07.0 Balantidiasis                     | <5 | <0.01 |
| A07.1 Giardiasis [lamblia]is]           | <5 | <0.01 |
| A07.2 Cryptosporidiosis                 | <5 | <0.01 |
| A07.3 Isosporiasis                      | <5 | <0.01 |
| A07.9 Protozoal intestinal disease, u.. | <5 | <0.01 |
| A15.3 Tuberculosis of lung, confirmed.. | <5 | <0.01 |
| A15.4 Tuberculosis of intrathoracic l.. | <5 | <0.01 |
| A15.5 Tuberculosis of larynx, trachea.. | <5 | <0.01 |
| A15.7 Primary respiratory tuberculosi.. | <5 | <0.01 |
| A15.8 Other respiratory tuberculosis,.. | <5 | <0.01 |
| A15.9 Respiratory tuberculosis unspec.. | <5 | <0.01 |
| A16.1 Tuberculosis of lung, bacteriol.. | <5 | <0.01 |
| A16.3 Tuberculosis of intrathoracic l.. | <5 | <0.01 |
| A16.4 Tuberculosis of larynx, trachea.. | <5 | <0.01 |
| A16.7 Primary respiratory tuberculosi.. | <5 | <0.01 |
| A16.8 Other respiratory tuberculosis,.. | <5 | <0.01 |
| A17.0 Tuberculous meningitis            | <5 | <0.01 |
| A17.9 Tuberculosis of nervous system,.. | <5 | <0.01 |

|                                         |    |       |
|-----------------------------------------|----|-------|
| A18.4 Tuberculosis of skin and subcut.. | <5 | <0.01 |
| A18.8 Tuberculosis of other specified.. | <5 | <0.01 |
| A19.0 Acute miliary tuberculosis of a.. | <5 | <0.01 |
| A19.2 Acute miliary tuberculosis, uns.. | <5 | <0.01 |
| A19.9 Miliary tuberculosis, unspecified | <5 | <0.01 |
| A20.9 Plague, unspecified               | <5 | <0.01 |
| A21.1 Oculoglandular tularaemia         | <5 | <0.01 |
| A21.2 Pulmonary tularaemia              | <5 | <0.01 |
| A21.7 Generalized tularaemia            | <5 | <0.01 |
| A21.8 Other forms of tularaemia         | <5 | <0.01 |
| A22.0 Cutaneous anthrax                 | <5 | <0.01 |
| A22.2 Gastrointestinal anthrax          | <5 | <0.01 |
| A23.9 Brucellosis, unspecified          | <5 | <0.01 |
| A24.0 Glanders                          | <5 | <0.01 |
| A26.0 Cutaneous erysipeloid             | <5 | <0.01 |
| A26.9 Erysipeloid, unspecified          | <5 | <0.01 |
| A27 Leptospirosis                       | <5 | <0.01 |
| A27.0 Leptospirosis icterohaemorrhagica | <5 | <0.01 |
| A27.8 Other forms of leptospirosis      | <5 | <0.01 |
| A28.2 Extraintestinal yersiniosis       | <5 | <0.01 |
| A28.8 Other specified zoonotic bacter.. | <5 | <0.01 |
| A28.9 Zoonotic bacterial disease, uns.. | <5 | <0.01 |
| A30 Leprosy [Hansen disease]            | <5 | <0.01 |
| A31.1 Cutaneous mycobacterial infection | <5 | <0.01 |
| A31.8 Other mycobacterial infections    | <5 | <0.01 |
| A32.9 Listeriosis, unspecified          | <5 | <0.01 |
| A35 Other tetanus                       | <5 | <0.01 |
| A36 Diphtheria                          | <5 | <0.01 |
| A37.0 Whooping cough due to Bordetell.. | <5 | <0.01 |
| A37.9 Whooping cough, unspecified       | <5 | <0.01 |
| A39 Meningococcal infection             | <5 | <0.01 |
| A39.8 Other meningococcal infections    | <5 | <0.01 |
| A39.9 Meningococcal infection, unspec.. | <5 | <0.01 |
| A40 Streptococcal sepsis                | <5 | <0.01 |
| A40.2 Sepsis due to streptococcus, gr.. | <5 | <0.01 |
| A41 Other sepsis                        | <5 | <0.01 |
| A41.3 Sepsis due to Haemophilus influ.. | <5 | <0.01 |
| A42 Actinomycosis                       | <5 | <0.01 |
| A42.0 Pulmonary actinomycosis           | <5 | <0.01 |
| A42.1 Abdominal actinomycosis           | <5 | <0.01 |
| A42.2 Cervicofacial actinomycosis       | <5 | <0.01 |
| A42.7 Actinomycotic sepsis              | <5 | <0.01 |
| A42.8 Other forms of actinomycosis      | <5 | <0.01 |
| A42.9 Actinomycosis, unspecified        | <5 | <0.01 |
| A44.1 Cutaneous and mucocutaneous bar.. | <5 | <0.01 |
| A49.2 Haemophilus influenzae infectio.. | <5 | <0.01 |
| A49.3 Mycoplasma infection, unspecifi.. | <5 | <0.01 |
| A50 Congenital syphilis                 | <5 | <0.01 |

|                                         |    |       |
|-----------------------------------------|----|-------|
| A50.5 Other late congenital syphilis,.. | <5 | <0.01 |
| A50.9 Congenital syphilis, unspecified  | <5 | <0.01 |
| A51.2 Primary syphilis of other sites   | <5 | <0.01 |
| A51.4 Other secondary syphilis          | <5 | <0.01 |
| A51.5 Early syphilis, latent            | <5 | <0.01 |
| A51.9 Early syphilis, unspecified       | <5 | <0.01 |
| A52.0 Cardiovascular syphilis           | <5 | <0.01 |
| A52.7 Other symptomatic late syphilis   | <5 | <0.01 |
| A52.8 Late syphilis, latent             | <5 | <0.01 |
| A53 Other and unspecified syphilis      | <5 | <0.01 |
| A53.9 Syphilis, unspecified             | <5 | <0.01 |
| A54 Gonococcal infection                | <5 | <0.01 |
| A54.3 Gonococcal infection of eye       | <5 | <0.01 |
| A54.4 Gonococcal infection of musculo.. | <5 | <0.01 |
| A54.8 Other gonococcal infections       | <5 | <0.01 |
| A55 Chlamydial lymphogranuloma (vener.. | <5 | <0.01 |
| A56.2 Chlamydial infection of genitou.. | <5 | <0.01 |
| A56.3 Chlamydial infection of anus an.. | <5 | <0.01 |
| A56.8 Sexually transmitted chlamydial.. | <5 | <0.01 |
| A58 Granuloma inguinale                 | <5 | <0.01 |
| A60.1 Herpesviral infection of perian.. | <5 | <0.01 |
| A66.1 Multiple papillomata and wet cr.. | <5 | <0.01 |
| A66.3 Hyperkeratosis of yaws            | <5 | <0.01 |
| A67 Pinta [carate]                      | <5 | <0.01 |
| A67.1 Intermediate lesions of pinta     | <5 | <0.01 |
| A68 Relapsing fevers                    | <5 | <0.01 |
| A69.0 Necrotizing ulcerative stomatitis | <5 | <0.01 |
| A69.1 Other Vincent infections          | <5 | <0.01 |
| A69.9 Spirochaetal infection, unspeci.. | <5 | <0.01 |
| A71 Trachoma                            | <5 | <0.01 |
| A75.0 Epidemic louse-borne typhus fev.. | <5 | <0.01 |
| A75.9 Typhus fever, unspecified         | <5 | <0.01 |
| A77.1 Spotted fever due to Rickettsia.. | <5 | <0.01 |
| A78 Q fever                             | <5 | <0.01 |
| A79.9 Rickettsiosis, unspecified        | <5 | <0.01 |
| A80.1 Acute paralytic poliomyelitis, .. | <5 | <0.01 |
| A80.3 Acute paralytic poliomyelitis, .. | <5 | <0.01 |
| A81.2 Progressive multifocal leukoenc.. | <5 | <0.01 |
| A83.0 Japanese encephalitis             | <5 | <0.01 |
| A83.6 Rocio virus disease               | <5 | <0.01 |
| A83.8 Other mosquito-borne viral ence.. | <5 | <0.01 |
| A84 Tick-borne viral encephalitis       | <5 | <0.01 |
| A84.1 Central European tick-borne enc.. | <5 | <0.01 |
| A85.0 Enteroviral encephalitis          | <5 | <0.01 |
| A85.1 Adenoviral encephalitis           | <5 | <0.01 |
| A85.2 Arthropod-borne viral encephali.. | <5 | <0.01 |
| A85.8 Other specified viral encephali.. | <5 | <0.01 |
| A87.1 Adenoviral meningitis             | <5 | <0.01 |

|                                         |    |       |
|-----------------------------------------|----|-------|
| A87.2 Lymphocytic choriomeningitis      | <5 | <0.01 |
| A88.1 Epidemic vertigo                  | <5 | <0.01 |
| A92.8 Other specified mosquito-borne .. | <5 | <0.01 |
| A96.0 Junin haemorrhagic fever          | <5 | <0.01 |
| A98.0 Crimean-Congo haemorrhagic fever  | <5 | <0.01 |
| A98.1 Omsk haemorrhagic fever           | <5 | <0.01 |
| A98.3 Marburg virus disease             | <5 | <0.01 |
| A98.4 Ebola virus disease               | <5 | <0.01 |
| A99 Unspecified viral haemorrhagic fe.. | <5 | <0.01 |
| B00.3 Herpesviral meningitis            | <5 | <0.01 |
| B02 Zoster [herpes zoster]              | <5 | <0.01 |
| B05 Measles                             | <5 | <0.01 |
| B05.3 Measles complicated by otitis m.. | <5 | <0.01 |
| B06.8 Rubella with other complications  | <5 | <0.01 |
| B08.0 Other orthopoxvirus infections    | <5 | <0.01 |
| B08.4 Enteroviral vesicular stomatiti.. | <5 | <0.01 |
| B15.0 Hepatitis A with hepatic coma     | <5 | <0.01 |
| B16.1 Acute hepatitis B with delta-ag.. | <5 | <0.01 |
| B17.2 Acute hepatitis E                 | <5 | <0.01 |
| B17.8 Other specified acute viral hep.. | <5 | <0.01 |
| B18.0 Chronic viral hepatitis B with .. | <5 | <0.01 |
| B20.0 HIV disease resulting in mycoba.. | <5 | <0.01 |
| B20.6 HIV disease resulting in Pneumo.. | <5 | <0.01 |
| B21.2 HIV disease resulting in other .. | <5 | <0.01 |
| B23.8 HIV disease resulting in other .. | <5 | <0.01 |
| B25.0 Cytomegaloviral pneumonitis       | <5 | <0.01 |
| B26 Mumps                               | <5 | <0.01 |
| B26.1 Mumps meningitis                  | <5 | <0.01 |
| B26.8 Mumps with other complications    | <5 | <0.01 |
| B27.8 Other infectious mononucleosis    | <5 | <0.01 |
| B30.8 Other viral conjunctivitis        | <5 | <0.01 |
| B33.0 Epidemic myalgia                  | <5 | <0.01 |
| B34.3 Parvovirus infection, unspecifi.. | <5 | <0.01 |
| B35.0 Tinea barbae and tinea capitis    | <5 | <0.01 |
| B35.2 Tinea manuum                      | <5 | <0.01 |
| B35.4 Tinea corporis                    | <5 | <0.01 |
| B35.6 Tinea cruris                      | <5 | <0.01 |
| B35.9 Dermatophytosis, unspecified      | <5 | <0.01 |
| B36.0 Pityriasis versicolor             | <5 | <0.01 |
| B36.9 Superficial mycosis, unspecified  | <5 | <0.01 |
| B37.2 Candidiasis of skin and nail      | <5 | <0.01 |
| B37.9 Candidiasis, unspecified          | <5 | <0.01 |
| B38 Coccidioidomycosis                  | <5 | <0.01 |
| B38.0 Acute pulmonary coccidioidomyc..  | <5 | <0.01 |
| B39.3 Disseminated histoplasmosis cap.. | <5 | <0.01 |
| B39.4 Histoplasmosis capsulati, unspe.. | <5 | <0.01 |
| B41.0 Pulmonary paracoccidioidomycosis  | <5 | <0.01 |
| B43.9 Chromomycosis, unspecified        | <5 | <0.01 |

|                                         |    |       |
|-----------------------------------------|----|-------|
| B44.9 Aspergillosis, unspecified        | <5 | <0.01 |
| B47.9 Mycetoma, unspecified             | <5 | <0.01 |
| B48.1 Rhinosporidiosis                  | <5 | <0.01 |
| B49 Unspecified mycosis                 | <5 | <0.01 |
| B50.0 Plasmodium falciparum malaria w.. | <5 | <0.01 |
| B50.8 Other severe and complicated Pl.. | <5 | <0.01 |
| B51 Plasmodium vivax malaria            | <5 | <0.01 |
| B51.0 Plasmodium vivax malaria with r.. | <5 | <0.01 |
| B52.0 Plasmodium malariae malaria wit.. | <5 | <0.01 |
| B52.9 Plasmodium malariae malaria wit.. | <5 | <0.01 |
| B55.2 Mucocutaneous leishmaniasis       | <5 | <0.01 |
| B58.8 Toxoplasmosis with other organ .. | <5 | <0.01 |
| B60.8 Other specified protozoal disea.. | <5 | <0.01 |
| B65.0 Schistosomiasis due to Schistos.. | <5 | <0.01 |
| B65.1 Schistosomiasis due to Schistos.. | <5 | <0.01 |
| B65.2 Schistosomiasis due to Schistos.. | <5 | <0.01 |
| B65.9 Schistosomiasis, unspecified      | <5 | <0.01 |
| B66 Other fluke infections              | <5 | <0.01 |
| B67.3 Echinococcus granulosus infecti.. | <5 | <0.01 |
| B67.8 Echinococcosis, unspecified, of.. | <5 | <0.01 |
| B67.9 Echinococcosis, other and unspe.. | <5 | <0.01 |
| B68.0 Taenia solium taeniasis           | <5 | <0.01 |
| B68.1 Taenia saginata taeniasis         | <5 | <0.01 |
| B68.9 Taeniasis, unspecified            | <5 | <0.01 |
| B69.0 Cysticercosis of central nervou.. | <5 | <0.01 |
| B71.0 Hymenolepiasis                    | <5 | <0.01 |
| B75 Trichinellosis                      | <5 | <0.01 |
| B76 Hookworm diseases                   | <5 | <0.01 |
| B78.0 Intestinal strongyloidiasis       | <5 | <0.01 |
| B79 Trichuriasis                        | <5 | <0.01 |
| B81.0 Anisakiasis                       | <5 | <0.01 |
| B81.4 Mixed intestinal helminthiasis    | <5 | <0.01 |
| B82.9 Intestinal parasitism, unspecif.. | <5 | <0.01 |
| B83.0 Visceral larva migrans            | <5 | <0.01 |
| B83.9 Helminthiasis, unspecified        | <5 | <0.01 |
| B85.1 Pediculosis due to Pediculus hu.. | <5 | <0.01 |
| B87.1 Wound myiasis                     | <5 | <0.01 |
| B87.9 Myiasis, unspecified              | <5 | <0.01 |
| B95.0 Streptococcus, group A, as the .. | <5 | <0.01 |
| B95.1 Streptococcus, group B, as the .. | <5 | <0.01 |
| B95.3 Streptococcus pneumoniae as the.. | <5 | <0.01 |
| B95.4 Other streptococcus as the caus.. | <5 | <0.01 |
| B95.5 Unspecified streptococcus as th.. | <5 | <0.01 |
| B95.6 Staphylococcus aureus as the ca.. | <5 | <0.01 |
| B95.7 Other staphylococcus as the cau.. | <5 | <0.01 |
| B96.1 Klebsiella pneumoniae [K. pneum.. | <5 | <0.01 |
| B96.2 Escherichia coli [E. coli] as t.. | <5 | <0.01 |
| B96.3 Haemophilus influenzae [H. infl.. | <5 | <0.01 |

|                                            |    |       |
|--------------------------------------------|----|-------|
| B96.5 Pseudomonas (aeruginosa) as the..    | <5 | <0.01 |
| B97.4 Respiratory syncytial virus as ..    | <5 | <0.01 |
| D73.3 Abscess of spleen                    | <5 | <0.01 |
| G00.2 Streptococcal meningitis             | <5 | <0.01 |
| G00.3 Staphylococcal meningitis            | <5 | <0.01 |
| G03.0 Nonpyogenic meningitis               | <5 | <0.01 |
| G03.1 Chronic meningitis                   | <5 | <0.01 |
| G04.1 Tropical spastic paraplegia          | <5 | <0.01 |
| G04.2 Bacterial meningoenkephalitis a..    | <5 | <0.01 |
| G05.0 Encephalitis, myelitis and ence..    | <5 | <0.01 |
| G05.2 Encephalitis, myelitis and ence..    | <5 | <0.01 |
| G06 Intracranial and intraspinal abscess.. | <5 | <0.01 |
| G06.2 Extradural and subdural abscess..    | <5 | <0.01 |
| H01.0 Blepharitis                          | <5 | <0.01 |
| H19.0 Scleritis and episcleritis in d..    | <5 | <0.01 |
| H22.0 Iridocyclitis in infectious and..    | <5 | <0.01 |
| H32.0 Chorioretinal inflammation in i..    | <5 | <0.01 |
| H60.2 Malignant otitis externa             | <5 | <0.01 |
| I32.0 Pericarditis in bacterial disea..    | <5 | <0.01 |
| I41.1 Myocarditis in viral diseases c..    | <5 | <0.01 |
| J02.8 Acute pharyngitis due to other ..    | <5 | <0.01 |
| J03 Acute tonsillitis                      | <5 | <0.01 |
| J10 Influenza due to other identified..    | <5 | <0.01 |
| J11 Influenza, virus not identified        | <5 | <0.01 |
| J12.0 Adenoviral pneumonia                 | <5 | <0.01 |
| J12.2 Parainfluenza virus pneumonia        | <5 | <0.01 |
| J12.8 Other viral pneumonia                | <5 | <0.01 |
| J15.0 Pneumonia due to Klebsiella pne..    | <5 | <0.01 |
| J15.1 Pneumonia due to Pseudomonas         | <5 | <0.01 |
| J15.3 Pneumonia due to streptococcus,..    | <5 | <0.01 |
| J15.4 Pneumonia due to other streptoc..    | <5 | <0.01 |
| J15.5 Pneumonia due to Escherichia coli    | <5 | <0.01 |
| J15.6 Pneumonia due to other aerobic ..    | <5 | <0.01 |
| J17.0 Pneumonia in bacterial diseases..    | <5 | <0.01 |
| J17.1 Pneumonia in viral diseases cla..    | <5 | <0.01 |
| J17.2 Pneumonia in mycoses                 | <5 | <0.01 |
| J18.2 Hypostatic pneumonia, unspecified    | <5 | <0.01 |
| J20 Acute bronchitis                       | <5 | <0.01 |
| J20.2 Acute bronchitis due to strepto..    | <5 | <0.01 |
| J20.4 Acute bronchitis due to parainf..    | <5 | <0.01 |
| J20.6 Acute bronchitis due to rhinovi..    | <5 | <0.01 |
| J21.8 Acute bronchiolitis due to othe..    | <5 | <0.01 |
| K02.0 Caries limited to enamel             | <5 | <0.01 |
| K02.2 Caries of cementum                   | <5 | <0.01 |
| K02.3 Arrested dental caries               | <5 | <0.01 |
| K23.0 Tuberculous oesophagitis             | <5 | <0.01 |
| K61.4 Intrasphincteric abscess             | <5 | <0.01 |
| K67.3 Tuberculous peritonitis              | <5 | <0.01 |



|                                         |               |            |
|-----------------------------------------|---------------|------------|
| K67.8 Other disorders of peritoneum i.. | <5            | <0.01      |
| L00 Staphylococcal scalded skin syndr.. | <5            | <0.01      |
| L04.1 Acute lymphadenitis of trunk      | <5            | <0.01      |
| L04.3 Acute lymphadenitis of lower limb | <5            | <0.01      |
| L08.1 Erythrasma                        | <5            | <0.01      |
| M00.8 Arthritis and polyarthritis due.. | <5            | <0.01      |
| M01.0 Meningococcal arthritis           | <5            | <0.01      |
| M01.1 Tuberculous arthritis             | <5            | <0.01      |
| M01.3 Arthritis in other bacterial di.. | <5            | <0.01      |
| M46.5 Other infective spondylopathies   | <5            | <0.01      |
| M49.0 Tuberculosis of spine             | <5            | <0.01      |
| M49.1 Brucella spondylitis              | <5            | <0.01      |
| M49.3 Spondylopathy in other infectio.. | <5            | <0.01      |
| M63.0 Myositis in bacterial diseases .. | <5            | <0.01      |
| M72.6 Necrotizing fasciitis             | <5            | <0.01      |
| M86.3 Chronic multifocal osteomyelitis  | <5            | <0.01      |
| M86.4 Chronic osteomyelitis with drai.. | <5            | <0.01      |
| M86.8 Other osteomyelitis               | <5            | <0.01      |
| N16.0 Renal tubulo-interstitial disor.. | <5            | <0.01      |
| O23.2 Infections of urethra in pregna.. | <5            | <0.01      |
| O23.3 Infections of other parts of ur.. | <5            | <0.01      |
| O98.0 Tuberculosis complicating pregn.. | <5            | <0.01      |
| O98.1 Syphilis complicating pregnancy.. | <5            | <0.01      |
| O98.6 Protozoal diseases complicating.. | <5            | <0.01      |
| P36.9 Bacterial sepsis of newborn, un.. | <5            | <0.01      |
| P37.1 Congenital toxoplasmosis          | <5            | <0.01      |
| P37.9 Congenital infectious and paras.. | <5            | <0.01      |
| P39.0 Neonatal infective mastitis       | <5            | <0.01      |
| P39.1 Neonatal conjunctivitis and dac.. | <5            | <0.01      |
| P39.9 Infection specific to the perin.. | <5            | <0.01      |
| R57.2 Septic shock                      | <5            | <0.01      |
| <b>Total</b>                            | <b>77 108</b> | <b>100</b> |

**eTable 8. Distribution of bacterial infections in primary analysis (Finnish multicohort sample)**

| ICD-10 code and description             | N      | %     |
|-----------------------------------------|--------|-------|
| K35 Acute appendicitis                  | 12 201 | 17.69 |
| J18.9 Pneumonia, unspecified            | 6447   | 9.35  |
| A09 Other gastroenteritis and colitis.. | 5917   | 8.58  |
| N10 Acute tubulo-interstitial nephritis | 3728   | 5.40  |
| J03.9 Acute tonsillitis, unspecified    | 3306   | 4.79  |
| A46 Erysipelas                          | 3222   | 4.67  |
| J36 Peritonsillar abscess               | 3144   | 4.56  |
| J15.9 Bacterial pneumonia, unspecified  | 2373   | 3.44  |
| N70.0 Acute salpingitis and oophoritis  | 1991   | 2.89  |
| O85 Puerperal sepsis                    | 1763   | 2.56  |
| J01.0 Acute maxillary sinusitis         | 1136   | 1.65  |
| N39.0 Urinary tract infection, site n.. | 1114   | 1.61  |

|                                         |      |      |
|-----------------------------------------|------|------|
| A49.9 Bacterial infection, unspecified  | 1091 | 1.58 |
| J03.0 Streptococcal tonsillitis         | 1005 | 1.46 |
| J22 Unspecified acute lower respirato.. | 800  | 1.16 |
| N71.0 Acute inflammatory disease of u.. | 737  | 1.07 |
| J02.9 Acute pharyngitis, unspecified    | 732  | 1.06 |
| J04.0 Acute laryngitis                  | 704  | 1.02 |
| K57.2 Diverticular disease of large i.. | 465  | 0.67 |
| J18.0 Bronchopneumonia, unspecified     | 458  | 0.66 |
| N30.0 Acute cystitis                    | 455  | 0.66 |
| A41.5 Sepsis due to other Gram-negati.. | 439  | 0.64 |
| L05.9 Pilonidal cyst without abscess    | 416  | 0.60 |
| O08.0 Genital tract and pelvic infect.. | 379  | 0.55 |
| O03.5 Spontaneous abortion: Complete .. | 370  | 0.54 |
| K61.0 Anal abscess                      | 348  | 0.50 |
| K05.3 Chronic periodontitis             | 347  | 0.50 |
| A04.7 Enterocolitis due to Clostridiu.. | 325  | 0.47 |
| H66.0 Acute suppurative otitis media    | 325  | 0.47 |
| N75.1 Abscess of Bartholin gland        | 308  | 0.45 |
| A41.9 Sepsis, unspecified               | 304  | 0.44 |
| J13 Pneumonia due to Streptococcus pn.. | 282  | 0.41 |
| K04.7 Periapical abscess without sinus  | 274  | 0.40 |
| N61 Inflammatory disorders of breast    | 266  | 0.39 |
| A69.2 Lyme disease                      | 249  | 0.36 |
| L04 Acute lymphadenitis                 | 236  | 0.34 |
| N45.9 Orchitis, epididymitis and epid.. | 217  | 0.31 |
| M00.9 Pyogenic arthritis, unspecified   | 215  | 0.31 |
| L03.0 Cellulitis of finger and toe      | 211  | 0.31 |
| K04.5 Chronic apical periodontitis      | 210  | 0.30 |
| A04.5 Campylobacter enteritis           | 205  | 0.30 |
| K65.0 Acute peritonitis                 | 190  | 0.28 |
| O23.0 Infections of kidney in pregnancy | 182  | 0.26 |
| K12.2 Cellulitis and abscess of mouth   | 181  | 0.26 |
| O23.5 Infections of the genital tract.. | 180  | 0.26 |
| K61 Abscess of anal and rectal regions  | 179  | 0.26 |
| O03.0 Spontaneous abortion: Incomplet.. | 178  | 0.26 |
| K02.1 Caries of dentine                 | 176  | 0.26 |
| J05.1 Acute epiglottitis                | 175  | 0.25 |
| L08.9 Local infection of skin and sub.. | 175  | 0.25 |
| A41.0 Sepsis due to Staphylococcus au.. | 174  | 0.25 |
| O86.0 Infection of obstetric surgical.. | 171  | 0.25 |
| L02 Cutaneous abscess, furuncle and c.. | 169  | 0.25 |
| A02.0 Salmonella enteritis              | 165  | 0.24 |
| O23.9 Other and unspecified genitouri.. | 162  | 0.23 |
| L02.4 Cutaneous abscess, furuncle and.. | 155  | 0.22 |
| A41.8 Other specified sepsis            | 151  | 0.22 |
| J15.8 Other bacterial pneumonia         | 150  | 0.22 |
| O86.1 Other infection of genital trac.. | 138  | 0.20 |
| A16.2 Tuberculosis of lung, without m.. | 136  | 0.20 |

|                                         |     |      |
|-----------------------------------------|-----|------|
| L05.0 Pilonidal cyst with abscess       | 130 | 0.19 |
| G00.9 Bacterial meningitis, unspecified | 128 | 0.19 |
| O86.4 Pyrexia of unknown origin follo.. | 126 | 0.18 |
| K05.2 Acute periodontitis               | 125 | 0.18 |
| J18.1 Lobar pneumonia, unspecified      | 117 | 0.17 |
| A40.3 Sepsis due to Streptococcus pne.. | 113 | 0.16 |
| A02 Other salmonella infections         | 111 | 0.16 |
| K02 Dental caries                       | 107 | 0.16 |
| L04.0 Acute lymphadenitis of face, he.. | 103 | 0.15 |
| L03.1 Cellulitis of other parts of limb | 101 | 0.15 |
| A56.1 Chlamydial infection of pelvipe.. | 100 | 0.14 |
| L02.2 Cutaneous abscess, furuncle and.. | 97  | 0.14 |
| J15.7 Pneumonia due to Mycoplasma pne.. | 96  | 0.14 |
| O04.0 Medical abortion: Incomplete, c.. | 94  | 0.14 |
| O23.4 Unspecified infection of urinar.. | 93  | 0.13 |
| A49.8 Other bacterial infections of u.. | 91  | 0.13 |
| A04.9 Bacterial intestinal infection,.. | 90  | 0.13 |
| H10.0 Mucopurulent conjunctivitis       | 88  | 0.13 |
| J86.9 Pyothorax without fistula         | 86  | 0.12 |
| O23.1 Infections of bladder in pregna.. | 85  | 0.12 |
| H00.1 Chalazion                         | 84  | 0.12 |
| L02.3 Cutaneous abscess, furuncle and.. | 84  | 0.12 |
| A15.0 Tuberculosis of lung, confirmed.. | 81  | 0.12 |
| M71.1 Other infective bursitis          | 81  | 0.12 |
| H60.3 Other infective otitis externa    | 79  | 0.11 |
| J16.8 Pneumonia due to other specifie.. | 78  | 0.11 |
| O86.2 Urinary tract infection followi.. | 78  | 0.11 |
| L03.9 Cellulitis, unspecified           | 76  | 0.11 |
| A54.9 Gonococcal infection, unspecified | 75  | 0.11 |
| L08.8 Other specified local infection.. | 74  | 0.11 |
| N41.0 Acute prostatitis                 | 73  | 0.11 |
| I33.0 Acute and subacute infective en.. | 71  | 0.10 |
| N76.4 Abscess of vulva                  | 71  | 0.10 |
| J39.0 Retropharyngeal and parapharyng.. | 70  | 0.10 |
| M86.9 Osteomyelitis, unspecified        | 69  | 0.10 |
| O04.5 Medical abortion: Complete or u.. | 68  | 0.10 |
| K04.6 Periapical abscess with sinus     | 67  | 0.10 |
| K57.0 Diverticular disease of small i.. | 66  | 0.10 |
| M86.1 Other acute osteomyelitis         | 63  | 0.09 |
| A04.8 Other specified bacterial intes.. | 62  | 0.09 |
| O75.3 Other infection during labour     | 62  | 0.09 |
| O86.8 Other specified puerperal infec.. | 62  | 0.09 |
| O98.8 Other maternal infectious and p.. | 62  | 0.09 |
| A54.2 Gonococcal pelviperitonitis and.. | 58  | 0.08 |
| H62.0 Otitis externa in bacterial dis.. | 58  | 0.08 |
| L02.1 Cutaneous abscess, furuncle and.. | 56  | 0.08 |
| L02.9 Cutaneous abscess, furuncle and.. | 56  | 0.08 |
| A74.9 Chlamydial infection, unspecified | 55  | 0.08 |

|                                         |    |      |
|-----------------------------------------|----|------|
| N73.3 Female acute pelvic peritonitis   | 53 | 0.08 |
| A38 Scarlet fever                       | 51 | 0.07 |
| O91.1 Abscess of breast associated wi.. | 51 | 0.07 |
| A40.8 Other streptococcal sepsis        | 47 | 0.07 |
| H00.0 Hordeolum and other deep inflam.. | 47 | 0.07 |
| A56.0 Chlamydial infection of lower g.. | 45 | 0.07 |
| H05.0 Acute inflammation of orbit       | 45 | 0.07 |
| J20.0 Acute bronchitis due to Mycopla.. | 44 | 0.06 |
| O98.3 Other infections with a predomi.. | 43 | 0.06 |
| J02.0 Streptococcal pharyngitis         | 42 | 0.06 |
| L03.2 Cellulitis of face                | 42 | 0.06 |
| A40.9 Streptococcal sepsis, unspecified | 41 | 0.06 |
| G00.8 Other bacterial meningitis        | 41 | 0.06 |
| J18.8 Other pneumonia, organism unspe.. | 41 | 0.06 |
| A18.2 Tuberculous peripheral lymphade.. | 40 | 0.06 |
| A40.0 Sepsis due to streptococcus, gr.. | 40 | 0.06 |
| A41.1 Sepsis due to other specified s.. | 40 | 0.06 |
| K61.1 Rectal abscess                    | 40 | 0.06 |
| K02.9 Dental caries, unspecified        | 39 | 0.06 |
| L02.0 Cutaneous abscess, furuncle and.. | 39 | 0.06 |
| L08.0 Pyoderma                          | 38 | 0.06 |
| M71.0 Abscess of bursa                  | 38 | 0.06 |
| J04.2 Acute laryngotracheitis           | 37 | 0.05 |
| A49.0 Staphylococcal infection, unspe.. | 36 | 0.05 |
| A04.6 Enteritis due to Yersinia enter.. | 35 | 0.05 |
| L02.8 Cutaneous abscess, furuncle and.. | 35 | 0.05 |
| H60.1 Cellulitis of external ear        | 33 | 0.05 |
| H70.0 Acute mastoiditis                 | 33 | 0.05 |
| A02.1 Salmonella sepsis                 | 32 | 0.05 |
| A39.0 Meningococcal meningitis          | 32 | 0.05 |
| M86.6 Other chronic osteomyelitis       | 32 | 0.05 |
| A16.5 Tuberculous pleurisy, without m.. | 30 | 0.04 |
| H60.0 Abscess of external ear           | 30 | 0.04 |
| G00.0 Haemophilus meningitis            | 29 | 0.04 |
| N73.0 Acute parametritis and pelvic c.. | 29 | 0.04 |
| A37 Whooping cough                      | 28 | 0.04 |
| J85.2 Abscess of lung without pneumonia | 28 | 0.04 |
| A41.2 Sepsis due to unspecified staph.. | 26 | 0.04 |
| M00.0 Staphylococcal arthritis and po.. | 26 | 0.04 |
| A05.9 Bacterial foodborne intoxicatio.. | 25 | 0.04 |
| H44.0 Purulent endophthalmitis          | 25 | 0.04 |
| J86.0 Pyothorax with fistula            | 25 | 0.04 |
| K63.0 Abscess of intestine              | 25 | 0.04 |
| K75.0 Abscess of liver                  | 24 | 0.03 |
| G00.1 Pneumococcal meningitis           | 23 | 0.03 |
| O86.3 Other genitourinary tract infec.. | 23 | 0.03 |
| O98.9 Unspecified maternal infectious.. | 23 | 0.03 |
| A21.9 Tularaemia, unspecified           | 22 | 0.03 |

|                                          |    |      |
|------------------------------------------|----|------|
| K11.3 Abscess of salivary gland          | 22 | 0.03 |
| L03.3 Cellulitis of trunk                | 22 | 0.03 |
| M65.0 Abscess of tendon sheath           | 22 | 0.03 |
| A18.0 Tuberculosis of bones and joints   | 21 | 0.03 |
| A21.0 Ulceroglandular tularaemia         | 21 | 0.03 |
| G06.0 Intracranial abscess and granul..  | 21 | 0.03 |
| K61.2 Anorectal abscess                  | 21 | 0.03 |
| N76.0 Acute vaginitis                    | 21 | 0.03 |
| A54.1 Gonococcal infection of lower g..  | 20 | 0.03 |
| G01 Meningitis in bacterial diseases ..  | 20 | 0.03 |
| K04.4 Acute apical periodontitis of p..  | 20 | 0.03 |
| A48.8 Other specified bacterial disea..  | 19 | 0.03 |
| J04.1 Acute tracheitis                   | 18 | 0.03 |
| N74.4 Female chlamydial pelvic inflam..  | 18 | 0.03 |
| A02.9 Salmonella infection, unspecified  | 17 | 0.02 |
| A41.4 Sepsis due to anaerobes            | 17 | 0.02 |
| J86 Pyothorax                            | 17 | 0.02 |
| N15.1 Renal and perinephric abscess      | 17 | 0.02 |
| A15.1 Tuberculosis of lung, confirmed..  | 16 | 0.02 |
| L01.0 Impetigo [any organism] [any si..  | 16 | 0.02 |
| A40.1 Sepsis due to streptococcus, gr..  | 15 | 0.02 |
| A51.0 Primary genital syphilis           | 15 | 0.02 |
| J03.8 Acute tonsillitis due to other ..  | 15 | 0.02 |
| L03.8 Cellulitis of other sites          | 15 | 0.02 |
| M46.3 Infection of intervertebral dis..  | 15 | 0.02 |
| N45.0 Orchitis, epididymitis and epid..  | 15 | 0.02 |
| O91.0 Infection of nipple associated ..  | 15 | 0.02 |
| A51.3 Secondary syphilis of skin and ..  | 14 | 0.02 |
| K57.4 Diverticular disease of both sm..  | 14 | 0.02 |
| A01.4 Paratyphoid fever, unspecified     | 13 | 0.02 |
| A03.3 Shigellosis due to Shigella son..  | 13 | 0.02 |
| J85.1 Abscess of lung with pneumonia     | 13 | 0.02 |
| N34.0 Urethral abscess                   | 13 | 0.02 |
| A64 Unspecified sexually transmitted ..  | 12 | 0.02 |
| G06.1 Intraspinous abscess and granuloma | 12 | 0.02 |
| L01 Impetigo                             | 12 | 0.02 |
| L70.1 Acne conglobata                    | 12 | 0.02 |
| O06.5 Unspecified abortion: Complete ..  | 12 | 0.02 |
| J14 Pneumonia due to Haemophilus infl..  | 11 | 0.02 |
| L04.9 Acute lymphadenitis, unspecified   | 11 | 0.02 |
| M00.2 Other streptococcal arthritis a..  | 11 | 0.02 |
| A01.2 Paratyphoid fever B                | 10 | 0.01 |
| A03.1 Shigellosis due to Shigella fle..  | 10 | 0.01 |
| A39.2 Acute meningococcaemia             | 10 | 0.01 |
| J16.0 Chlamydial pneumonia               | 10 | 0.01 |
| K61.3 Ischioanal abscess                 | 10 | 0.01 |
| L01.1 Impetiginization of other derma..  | 10 | 0.01 |
| M01.2 Arthritis in Lyme disease          | 10 | 0.01 |

|                                         |    |       |
|-----------------------------------------|----|-------|
| M46.2 Osteomyelitis of vertebra         | 10 | 0.01  |
| N13.6 Pyonephrosis                      | 10 | 0.01  |
| A01.0 Typhoid fever                     | 8  | 0.01  |
| A02.2 Localized salmonella infections   | 8  | 0.01  |
| A02.8 Other specified salmonella infe.. | 8  | 0.01  |
| A15.6 Tuberculous pleurisy, confirmed.. | 8  | 0.01  |
| A16.0 Tuberculosis of lung, bacteriol.. | 8  | 0.01  |
| A16.9 Respiratory tuberculosis unspec.. | 8  | 0.01  |
| A18.1 Tuberculosis of genitourinary s.. | 8  | 0.01  |
| A31.0 Pulmonary mycobacterial infection | 8  | 0.01  |
| A32.8 Other forms of listeriosis        | 8  | 0.01  |
| A39.4 Meningococcaemia, unspecified     | 8  | 0.01  |
| A49.1 Streptococcal infection, unspec.. | 8  | 0.01  |
| J39.1 Other abscess of pharynx          | 8  | 0.01  |
| K02.8 Other dental caries               | 8  | 0.01  |
| O07.0 Failed medical abortion, compli.. | 8  | 0.01  |
| O07.5 Other and unspecified failed at.. | 8  | 0.01  |
| A74.8 Other chlamydial diseases         | 7  | 0.01  |
| J20.1 Acute bronchitis due to Haemoph.. | 7  | 0.01  |
| K05.0 Acute gingivitis                  | 7  | 0.01  |
| O05.0 Other abortion: Incomplete, com.. | 7  | 0.01  |
| O05.5 Other abortion: Complete or uns.. | 7  | 0.01  |
| A04.3 Enterohaemorrhagic Escherichia .. | 6  | 0.01  |
| A18.3 Tuberculosis of intestines, per.. | 6  | 0.01  |
| A31 Infection due to other mycobacteria | 6  | 0.01  |
| A48.0 Gas gangrene                      | 6  | 0.01  |
| A52.1 Symptomatic neurosyphilis         | 6  | 0.01  |
| A54.0 Gonococcal infection of lower g.. | 6  | 0.01  |
| H10.5 Blepharconjunctivitis             | 6  | 0.01  |
| J15.0 Pneumonia due to Klebsiella pne.. | 6  | 0.01  |
| J85.3 Abscess of mediastinum            | 6  | 0.01  |
| M65.1 Other infective (teno)synovitis   | 6  | 0.01  |
| O06.0 Unspecified abortion: Incomplet.. | 6  | 0.01  |
| A03.9 Shigellosis, unspecified          | 5  | 0.01  |
| A15.2 Tuberculosis of lung, confirmed.. | 5  | 0.01  |
| A18.4 Tuberculosis of skin and subcut.. | 5  | 0.01  |
| A31.9 Mycobacterial infection, unspec.. | 5  | 0.01  |
| A32.7 Listerial sepsis                  | 5  | 0.01  |
| B95.8 Unspecified staphylococcus as t.. | 5  | 0.01  |
| G05.0 Encephalitis, myelitis and ence.. | 5  | 0.01  |
| J15.2 Pneumonia due to staphylococcus   | 5  | 0.01  |
| K57.8 Diverticular disease of intesti.. | 5  | 0.01  |
| L04.2 Acute lymphadenitis of upper limb | 5  | 0.01  |
| L04.8 Acute lymphadenitis of other si.. | 5  | 0.01  |
| M86.0 Acute haematogenous osteomyelitis | 5  | 0.01  |
| M86.2 Subacute osteomyelitis            | 5  | 0.01  |
| A00.9 Cholera, unspecified              | <5 | <0.01 |
| A01.1 Paratyphoid fever A               | <5 | <0.01 |

|                                         |    |       |
|-----------------------------------------|----|-------|
| A01.3 Paratyphoid fever C               | <5 | <0.01 |
| A03 Shigellosis                         | <5 | <0.01 |
| A03.0 Shigellosis due to Shigella dys.. | <5 | <0.01 |
| A03.2 Shigellosis due to Shigella boy.. | <5 | <0.01 |
| A04 Other bacterial intestinal infect.. | <5 | <0.01 |
| A04.0 Enteropathogenic Escherichia co.. | <5 | <0.01 |
| A04.1 Enterotoxigenic Escherichia col.. | <5 | <0.01 |
| A04.2 Enteroinvasive Escherichia coli.. | <5 | <0.01 |
| A04.4 Other intestinal Escherichia co.. | <5 | <0.01 |
| A05.0 Foodborne staphylococcal intoxi.. | <5 | <0.01 |
| A05.1 Botulism                          | <5 | <0.01 |
| A05.2 Foodborne Clostridium perfringe.. | <5 | <0.01 |
| A05.8 Other specified bacterial foodb.. | <5 | <0.01 |
| A15.3 Tuberculosis of lung, confirmed.. | <5 | <0.01 |
| A15.4 Tuberculosis of intrathoracic l.. | <5 | <0.01 |
| A15.5 Tuberculosis of larynx, trachea.. | <5 | <0.01 |
| A15.7 Primary respiratory tuberculosi.. | <5 | <0.01 |
| A15.8 Other respiratory tuberculosis,.. | <5 | <0.01 |
| A15.9 Respiratory tuberculosis unspec.. | <5 | <0.01 |
| A16.1 Tuberculosis of lung, bacteriol.. | <5 | <0.01 |
| A16.3 Tuberculosis of intrathoracic l.. | <5 | <0.01 |
| A16.4 Tuberculosis of larynx, trachea.. | <5 | <0.01 |
| A16.7 Primary respiratory tuberculosi.. | <5 | <0.01 |
| A16.8 Other respiratory tuberculosis,.. | <5 | <0.01 |
| A17.0 Tuberculous meningitis            | <5 | <0.01 |
| A17.9 Tuberculosis of nervous system,.. | <5 | <0.01 |
| A18.8 Tuberculosis of other specified.. | <5 | <0.01 |
| A19.0 Acute miliary tuberculosis of a.. | <5 | <0.01 |
| A19.2 Acute miliary tuberculosis, uns.. | <5 | <0.01 |
| A19.9 Miliary tuberculosis, unspecified | <5 | <0.01 |
| A20.9 Plague, unspecified               | <5 | <0.01 |
| A21.1 Oculoglandular tularaemia         | <5 | <0.01 |
| A21.2 Pulmonary tularaemia              | <5 | <0.01 |
| A21.7 Generalized tularaemia            | <5 | <0.01 |
| A21.8 Other forms of tularaemia         | <5 | <0.01 |
| A22.0 Cutaneous anthrax                 | <5 | <0.01 |
| A22.2 Gastrointestinal anthrax          | <5 | <0.01 |
| A23.9 Brucellosis, unspecified          | <5 | <0.01 |
| A24.0 Glanders                          | <5 | <0.01 |
| A26.0 Cutaneous erysipeloid             | <5 | <0.01 |
| A26.9 Erysipeloid, unspecified          | <5 | <0.01 |
| A27 Leptospirosis                       | <5 | <0.01 |
| A27.0 Leptospirosis icterohaemorrhagica | <5 | <0.01 |
| A27.8 Other forms of leptospirosis      | <5 | <0.01 |
| A27.9 Leptospirosis, unspecified        | <5 | <0.01 |
| A28.2 Extraintestinal yersiniosis       | <5 | <0.01 |
| A28.8 Other specified zoonotic bacter.. | <5 | <0.01 |
| A28.9 Zoonotic bacterial disease, uns.. | <5 | <0.01 |

|                                         |    |       |
|-----------------------------------------|----|-------|
| A30 Leprosy [Hansen disease]            | <5 | <0.01 |
| A31.1 Cutaneous mycobacterial infection | <5 | <0.01 |
| A31.8 Other mycobacterial infections    | <5 | <0.01 |
| A32.9 Listeriosis, unspecified          | <5 | <0.01 |
| A35 Other tetanus                       | <5 | <0.01 |
| A36 Diphtheria                          | <5 | <0.01 |
| A37.0 Whooping cough due to Bordetell.. | <5 | <0.01 |
| A37.9 Whooping cough, unspecified       | <5 | <0.01 |
| A39 Meningococcal infection             | <5 | <0.01 |
| A39.8 Other meningococcal infections    | <5 | <0.01 |
| A39.9 Meningococcal infection, unspec.. | <5 | <0.01 |
| A40 Streptococcal sepsis                | <5 | <0.01 |
| A40.2 Sepsis due to streptococcus, gr.. | <5 | <0.01 |
| A41 Other sepsis                        | <5 | <0.01 |
| A41.3 Sepsis due to Haemophilus influ.. | <5 | <0.01 |
| A42 Actinomycosis                       | <5 | <0.01 |
| A42.0 Pulmonary actinomycosis           | <5 | <0.01 |
| A42.1 Abdominal actinomycosis           | <5 | <0.01 |
| A42.2 Cervicofacial actinomycosis       | <5 | <0.01 |
| A42.7 Actinomycotic sepsis              | <5 | <0.01 |
| A42.8 Other forms of actinomycosis      | <5 | <0.01 |
| A42.9 Actinomycosis, unspecified        | <5 | <0.01 |
| A44.1 Cutaneous and mucocutaneous bar.. | <5 | <0.01 |
| A49.2 Haemophilus influenzae infectio.. | <5 | <0.01 |
| A49.3 Mycoplasma infection, unspecifi.. | <5 | <0.01 |
| A50 Congenital syphilis                 | <5 | <0.01 |
| A50.5 Other late congenital syphilis,.. | <5 | <0.01 |
| A50.9 Congenital syphilis, unspecified  | <5 | <0.01 |
| A51.2 Primary syphilis of other sites   | <5 | <0.01 |
| A51.4 Other secondary syphilis          | <5 | <0.01 |
| A51.5 Early syphilis, latent            | <5 | <0.01 |
| A51.9 Early syphilis, unspecified       | <5 | <0.01 |
| A52.0 Cardiovascular syphilis           | <5 | <0.01 |
| A52.7 Other symptomatic late syphilis   | <5 | <0.01 |
| A52.8 Late syphilis, latent             | <5 | <0.01 |
| A53 Other and unspecified syphilis      | <5 | <0.01 |
| A53.9 Syphilis, unspecified             | <5 | <0.01 |
| A54 Gonococcal infection                | <5 | <0.01 |
| A54.3 Gonococcal infection of eye       | <5 | <0.01 |
| A54.4 Gonococcal infection of musculo.. | <5 | <0.01 |
| A54.8 Other gonococcal infections       | <5 | <0.01 |
| A55 Chlamydial lymphogranuloma (vener.. | <5 | <0.01 |
| A56.2 Chlamydial infection of genitou.. | <5 | <0.01 |
| A56.3 Chlamydial infection of anus an.. | <5 | <0.01 |
| A56.8 Sexually transmitted chlamydial.. | <5 | <0.01 |
| A58 Granuloma inguinale                 | <5 | <0.01 |
| A66.1 Multiple papillomata and wet cr.. | <5 | <0.01 |
| A66.3 Hyperkeratosis of yaws            | <5 | <0.01 |



|                                         |    |       |
|-----------------------------------------|----|-------|
| A67 Pinta [carate]                      | <5 | <0.01 |
| A67.1 Intermediate lesions of pinta     | <5 | <0.01 |
| A68 Relapsing fevers                    | <5 | <0.01 |
| A69.0 Necrotizing ulcerative stomatitis | <5 | <0.01 |
| A69.1 Other Vincent infections          | <5 | <0.01 |
| A69.9 Spirochaetal infection, unspeci.. | <5 | <0.01 |
| A70 Chlamydia psittaci infection        | <5 | <0.01 |
| A71 Trachoma                            | <5 | <0.01 |
| A75.0 Epidemic louse-borne typhus fev.. | <5 | <0.01 |
| A75.9 Typhus fever, unspecified         | <5 | <0.01 |
| A77.1 Spotted fever due to Rickettsia.. | <5 | <0.01 |
| A77.8 Other spotted fevers              | <5 | <0.01 |
| A78 Q fever                             | <5 | <0.01 |
| A79.9 Rickettsiosis, unspecified        | <5 | <0.01 |
| B95.0 Streptococcus, group A, as the .. | <5 | <0.01 |
| B95.1 Streptococcus, group B, as the .. | <5 | <0.01 |
| B95.3 Streptococcus pneumoniae as the.. | <5 | <0.01 |
| B95.4 Other streptococcus as the caus.. | <5 | <0.01 |
| B95.5 Unspecified streptococcus as th.. | <5 | <0.01 |
| B95.6 Staphylococcus aureus as the ca.. | <5 | <0.01 |
| B95.7 Other staphylococcus as the cau.. | <5 | <0.01 |
| B96.1 Klebsiella pneumoniae [K. pneum.. | <5 | <0.01 |
| B96.2 Escherichia coli [E. coli] as t.. | <5 | <0.01 |
| B96.3 Haemophilus influenzae [H. infl.. | <5 | <0.01 |
| B96.5 Pseudomonas (aeruginosa) as the.. | <5 | <0.01 |
| B96.8 Other specified bacterial agent.. | <5 | <0.01 |
| D73.3 Abscess of spleen                 | <5 | <0.01 |
| G00.2 Streptococcal meningitis          | <5 | <0.01 |
| G00.3 Staphylococcal meningitis         | <5 | <0.01 |
| G04.2 Bacterial meningoenzephalitis a.. | <5 | <0.01 |
| G06 Intracranial and intraspinal absc.. | <5 | <0.01 |
| G06.2 Extradural and subdural abscess.. | <5 | <0.01 |
| H01.0 Blepharitis                       | <5 | <0.01 |
| H60.2 Malignant otitis externa          | <5 | <0.01 |
| I32.0 Pericarditis in bacterial disea.. | <5 | <0.01 |
| I41.0 Myocarditis in bacterial diseas.. | <5 | <0.01 |
| J02.8 Acute pharyngitis due to other .. | <5 | <0.01 |
| J03 Acute tonsillitis                   | <5 | <0.01 |
| J15.1 Pneumonia due to Pseudomonas      | <5 | <0.01 |
| J15.3 Pneumonia due to streptococcus,.. | <5 | <0.01 |
| J15.4 Pneumonia due to other streptoc.. | <5 | <0.01 |
| J15.5 Pneumonia due to Escherichia coli | <5 | <0.01 |
| J15.6 Pneumonia due to other aerobic .. | <5 | <0.01 |
| J17.0 Pneumonia in bacterial diseases.. | <5 | <0.01 |
| J18.2 Hypostatic pneumonia, unspecified | <5 | <0.01 |
| J20.2 Acute bronchitis due to strepto.. | <5 | <0.01 |
| K02.0 Caries limited to enamel          | <5 | <0.01 |
| K02.2 Caries of cementum                | <5 | <0.01 |

|                                         |               |            |
|-----------------------------------------|---------------|------------|
| K02.3 Arrested dental caries            | <5            | <0.01      |
| K23.0 Tuberculous oesophagitis          | <5            | <0.01      |
| K61.4 Intrasphincteric abscess          | <5            | <0.01      |
| K67.3 Tuberculous peritonitis           | <5            | <0.01      |
| L00 Staphylococcal scalded skin syndr.. | <5            | <0.01      |
| L04.1 Acute lymphadenitis of trunk      | <5            | <0.01      |
| L04.3 Acute lymphadenitis of lower limb | <5            | <0.01      |
| L08.1 Erythrasma                        | <5            | <0.01      |
| M00.8 Arthritis and polyarthritis due.. | <5            | <0.01      |
| M01.0 Meningococcal arthritis           | <5            | <0.01      |
| M01.1 Tuberculous arthritis             | <5            | <0.01      |
| M01.3 Arthritis in other bacterial di.. | <5            | <0.01      |
| M46.5 Other infective spondylopathies   | <5            | <0.01      |
| M49.0 Tuberculosis of spine             | <5            | <0.01      |
| M49.1 Brucella spondylitis              | <5            | <0.01      |
| M63.0 Myositis in bacterial diseases .. | <5            | <0.01      |
| M72.6 Necrotizing fasciitis             | <5            | <0.01      |
| M86.3 Chronic multifocal osteomyelitis  | <5            | <0.01      |
| M86.4 Chronic osteomyelitis with drai.. | <5            | <0.01      |
| M86.8 Other osteomyelitis               | <5            | <0.01      |
| O23.2 Infections of urethra in pregna.. | <5            | <0.01      |
| O23.3 Infections of other parts of ur.. | <5            | <0.01      |
| O98.0 Tuberculosis complicating pregn.. | <5            | <0.01      |
| O98.1 Syphilis complicating pregnancy.. | <5            | <0.01      |
| P36.9 Bacterial sepsis of newborn, un.. | <5            | <0.01      |
| P39.0 Neonatal infective mastitis       | <5            | <0.01      |
| P39.1 Neonatal conjunctivitis and dac.. | <5            | <0.01      |
| <b>Total</b>                            | <b>68 979</b> | <b>100</b> |

**eTable 9. Distribution of invasive bacterial infections in primary analysis (Finnish multicohort sample)**

| ICD-10 code and description             | N      | %     |
|-----------------------------------------|--------|-------|
| K35 Acute appendicitis                  | 13 003 | 25.53 |
| J18.9 Pneumonia, unspecified            | 7258   | 14.25 |
| N10 Acute tubulo-interstitial nephritis | 4076   | 8.00  |
| A46 Erysipelas                          | 3608   | 7.08  |
| J36 Peritonsillar abscess               | 3380   | 6.64  |
| J15.9 Bacterial pneumonia, unspecified  | 2656   | 5.21  |
| N70.0 Acute salpingitis and oophoritis  | 2054   | 4.03  |
| O85 Puerperal sepsis                    | 1822   | 3.58  |
| A49.9 Bacterial infection, unspecified  | 1228   | 2.41  |
| N71.0 Acute inflammatory disease of u.. | 772    | 1.52  |
| J18.0 Bronchopneumonia, unspecified     | 514    | 1.01  |
| K57.2 Diverticular disease of large i.. | 496    | 0.97  |
| A41.5 Sepsis due to other Gram-negati.. | 489    | 0.96  |
| K61.0 Anal abscess                      | 416    | 0.82  |
| O08.0 Genital tract and pelvic infect.. | 382    | 0.75  |

|                                         |     |      |
|-----------------------------------------|-----|------|
| O03.5 Spontaneous abortion: Complete .. | 380 | 0.75 |
| A41.9 Sepsis, unspecified               | 360 | 0.71 |
| N75.1 Abscess of Bartholin gland        | 319 | 0.63 |
| J13 Pneumonia due to Streptococcus pn.. | 310 | 0.61 |
| N61 Inflammatory disorders of breast    | 278 | 0.55 |
| A69.2 Lyme disease                      | 271 | 0.53 |
| N45.9 Orchitis, epididymitis and epid.. | 248 | 0.49 |
| M00.9 Pyogenic arthritis, unspecified   | 233 | 0.46 |
| K12.2 Cellulitis and abscess of mouth   | 218 | 0.43 |
| K65.0 Acute peritonitis                 | 211 | 0.41 |
| A41.0 Sepsis due to Staphylococcus au.. | 208 | 0.41 |
| J05.1 Acute epiglottitis                | 202 | 0.40 |
| O23.0 Infections of kidney in pregnancy | 196 | 0.38 |
| A02.0 Salmonella enteritis              | 195 | 0.38 |
| K61 Abscess of anal and rectal regions  | 188 | 0.37 |
| O03.0 Spontaneous abortion: Incomplet.. | 188 | 0.37 |
| J15.8 Other bacterial pneumonia         | 166 | 0.33 |
| A41.8 Other specified sepsis            | 165 | 0.32 |
| A16.2 Tuberculosis of lung, without m.. | 138 | 0.27 |
| G00.9 Bacterial meningitis, unspecified | 132 | 0.26 |
| J18.1 Lobar pneumonia, unspecified      | 132 | 0.26 |
| A40.3 Sepsis due to Streptococcus pne.. | 126 | 0.25 |
| A02 Other salmonella infections         | 118 | 0.23 |
| J15.7 Pneumonia due to Mycoplasma pne.. | 109 | 0.21 |
| A56.1 Chlamydial infection of pelvipe.. | 106 | 0.21 |
| O04.0 Medical abortion: Incomplete, c.. | 106 | 0.21 |
| A49.8 Other bacterial infections of u.. | 96  | 0.19 |
| J86.9 Pyothorax without fistula         | 90  | 0.18 |
| A15.0 Tuberculosis of lung, confirmed.. | 86  | 0.17 |
| J16.8 Pneumonia due to other specifie.. | 85  | 0.17 |
| M71.1 Other infective bursitis          | 85  | 0.17 |
| M86.9 Osteomyelitis, unspecified        | 83  | 0.16 |
| J39.0 Retropharyngeal and parapharyng.. | 81  | 0.16 |
| I33.0 Acute and subacute infective en.. | 76  | 0.15 |
| N76.4 Abscess of vulva                  | 74  | 0.15 |
| M86.1 Other acute osteomyelitis         | 73  | 0.14 |
| O04.5 Medical abortion: Complete or u.. | 73  | 0.14 |
| K57.0 Diverticular disease of small i.. | 68  | 0.13 |
| O75.3 Other infection during labour     | 68  | 0.13 |
| A54.2 Gonococcal pelviperitonitis and.. | 62  | 0.12 |
| A40.8 Other streptococcal sepsis        | 56  | 0.11 |
| O91.1 Abscess of breast associated wi.. | 56  | 0.11 |
| A38 Scarlet fever                       | 55  | 0.11 |
| N73.3 Female acute pelvic peritonitis   | 55  | 0.11 |
| A41.1 Sepsis due to other specified s.. | 53  | 0.10 |
| A40.0 Sepsis due to streptococcus, gr.. | 51  | 0.10 |
| H05.0 Acute inflammation of orbit       | 50  | 0.10 |
| J18.8 Other pneumonia, organism unspe.. | 48  | 0.09 |

|                                          |    |      |
|------------------------------------------|----|------|
| A18.2 Tuberculous peripheral lymphade..  | 45 | 0.09 |
| A40.9 Streptococcal sepsis, unspecified  | 45 | 0.09 |
| K61.1 Rectal abscess                     | 44 | 0.09 |
| M71.0 Abscess of bursa                   | 44 | 0.09 |
| A49.0 Staphylococcal infection, unspe..  | 43 | 0.08 |
| G00.8 Other bacterial meningitis         | 42 | 0.08 |
| H60.1 Cellulitis of external ear         | 38 | 0.07 |
| H70.0 Acute mastoiditis                  | 38 | 0.07 |
| H60.0 Abscess of external ear            | 35 | 0.07 |
| A02.1 Salmonella sepsis                  | 34 | 0.07 |
| A39.0 Meningococcal meningitis           | 34 | 0.07 |
| M86.6 Other chronic osteomyelitis        | 33 | 0.06 |
| N73.0 Acute parametritis and pelvic c..  | 32 | 0.06 |
| A16.5 Tuberculous pleurisy, without m..  | 31 | 0.06 |
| G00.0 Haemophilus meningitis             | 30 | 0.06 |
| J85.2 Abscess of lung without pneumonia  | 30 | 0.06 |
| K75.0 Abscess of liver                   | 29 | 0.06 |
| A41.2 Sepsis due to unspecified staph..  | 28 | 0.05 |
| H44.0 Purulent endophthalmitis           | 28 | 0.05 |
| J86.0 Pyothorax with fistula             | 27 | 0.05 |
| K63.0 Abscess of intestine               | 27 | 0.05 |
| M00.0 Staphylococcal arthritis and po..  | 26 | 0.05 |
| A21.9 Tularaemia, unspecified            | 24 | 0.05 |
| G00.1 Pneumococcal meningitis            | 24 | 0.05 |
| M65.0 Abscess of tendon sheath           | 24 | 0.05 |
| A21.0 Ulceroglandular tularaemia         | 23 | 0.05 |
| G06.0 Intracranial abscess and granul..  | 23 | 0.05 |
| K61.2 Anorectal abscess                  | 23 | 0.05 |
| A18.0 Tuberculosis of bones and joints   | 21 | 0.04 |
| A40.1 Sepsis due to streptococcus, gr..  | 21 | 0.04 |
| A48.8 Other specified bacterial disea..  | 21 | 0.04 |
| G01 Meningitis in bacterial diseases ..  | 21 | 0.04 |
| A54.1 Gonococcal infection of lower g..  | 20 | 0.04 |
| A41.4 Sepsis due to anaerobes            | 19 | 0.04 |
| J86 Pyothorax                            | 19 | 0.04 |
| N15.1 Renal and perinephric abscess      | 19 | 0.04 |
| A02.9 Salmonella infection, unspecified  | 18 | 0.04 |
| M46.3 Infection of intervertebral dis..  | 18 | 0.04 |
| N74.4 Female chlamydial pelvic inflam..  | 18 | 0.04 |
| A15.1 Tuberculosis of lung, confirmed..  | 17 | 0.03 |
| A51.0 Primary genital syphilis           | 17 | 0.03 |
| N45.0 Orchitis, epididymitis and epid..  | 17 | 0.03 |
| A51.3 Secondary syphilis of skin and ..  | 15 | 0.03 |
| K57.4 Diverticular disease of both sm..  | 15 | 0.03 |
| A03.3 Shigellosis due to Shigella son..  | 14 | 0.03 |
| G06.1 Intraspinous abscess and granuloma | 14 | 0.03 |
| J85.1 Abscess of lung with pneumonia     | 14 | 0.03 |
| A01.4 Paratyphoid fever, unspecified     | 13 | 0.03 |

|                                         |    |      |
|-----------------------------------------|----|------|
| N34.0 Urethral abscess                  | 13 | 0.03 |
| O06.5 Unspecified abortion: Complete .. | 13 | 0.03 |
| A39.2 Acute meningococcaemia            | 12 | 0.02 |
| J14 Pneumonia due to Haemophilus infl.. | 12 | 0.02 |
| A03.1 Shigellosis due to Shigella fle.. | 11 | 0.02 |
| J16.0 Chlamydial pneumonia              | 11 | 0.02 |
| M00.2 Other streptococcal arthritis a.. | 11 | 0.02 |
| M46.2 Osteomyelitis of vertebra         | 11 | 0.02 |
| O07.0 Failed medical abortion, compli.. | 11 | 0.02 |
| A01.2 Paratyphoid fever B               | 10 | 0.02 |
| A02.8 Other specified salmonella infe.. | 10 | 0.02 |
| A31.0 Pulmonary mycobacterial infection | 10 | 0.02 |
| B95.8 Unspecified staphylococcus as t.. | 10 | 0.02 |
| K61.3 Ischiorectal abscess              | 10 | 0.02 |
| M01.2 Arthritis in Lyme disease         | 10 | 0.02 |
| N13.6 Pyonephrosis                      | 10 | 0.02 |
| O07.5 Other and unspecified failed at.. | 10 | 0.02 |
| A18.1 Tuberculosis of genitourinary s.. | 9  | 0.02 |
| A49.1 Streptococcal infection, unspec.. | 9  | 0.02 |
| A01.0 Typhoid fever                     | 8  | 0.02 |
| A02.2 Localized salmonella infections   | 8  | 0.02 |
| A15.6 Tuberculous pleurisy, confirmed.. | 8  | 0.02 |
| A16.0 Tuberculosis of lung, bacteriol.. | 8  | 0.02 |
| A16.9 Respiratory tuberculosis unspec.. | 8  | 0.02 |
| A32.8 Other forms of listeriosis        | 8  | 0.02 |
| A39.4 Meningococcaemia, unspecified     | 8  | 0.02 |
| J39.1 Other abscess of pharynx          | 8  | 0.02 |
| A03.9 Shigellosis, unspecified          | 7  | 0.01 |
| A32.7 Listerial sepsis                  | 7  | 0.01 |
| A48.0 Gas gangrene                      | 7  | 0.01 |
| A52.1 Symptomatic neurosyphilis         | 7  | 0.01 |
| B95.5 Unspecified streptococcus as th.. | 7  | 0.01 |
| J15.0 Pneumonia due to Klebsiella pne.. | 7  | 0.01 |
| M86.0 Acute haematogenous osteomyelitis | 7  | 0.01 |
| M86.8 Other osteomyelitis               | 7  | 0.01 |
| O05.0 Other abortion: Incomplete, com.. | 7  | 0.01 |
| O05.5 Other abortion: Complete or uns.. | 7  | 0.01 |
| O06.0 Unspecified abortion: Incomplet.. | 7  | 0.01 |
| A15.2 Tuberculosis of lung, confirmed.. | 6  | 0.01 |
| A18.3 Tuberculosis of intestines, per.. | 6  | 0.01 |
| A31 Infection due to other mycobacteria | 6  | 0.01 |
| B96.2 Escherichia coli [E. coli] as t.. | 6  | 0.01 |
| G05.0 Encephalitis, myelitis and ence.. | 6  | 0.01 |
| J85.3 Abscess of mediastinum            | 6  | 0.01 |
| M65.1 Other infective (teno)synovitis   | 6  | 0.01 |
| A18.4 Tuberculosis of skin and subcut.. | 5  | 0.01 |
| A31.9 Mycobacterial infection, unspec.. | 5  | 0.01 |
| B95.0 Streptococcus, group A, as the .. | 5  | 0.01 |

|                                         |    |       |
|-----------------------------------------|----|-------|
| B95.6 Staphylococcus aureus as the ca.. | 5  | 0.01  |
| B96.8 Other specified bacterial agent.. | 5  | 0.01  |
| G00.2 Streptococcal meningitis          | 5  | 0.01  |
| J15.2 Pneumonia due to staphylococcus   | 5  | 0.01  |
| K57.8 Diverticular disease of intesti.. | 5  | 0.01  |
| M01.3 Arthritis in other bacterial di.. | 5  | 0.01  |
| M86.2 Subacute osteomyelitis            | 5  | 0.01  |
| O98.0 Tuberculosis complicating pregn.. | 5  | 0.01  |
| A01.1 Paratyphoid fever A               | <5 | <0.01 |
| A01.3 Paratyphoid fever C               | <5 | <0.01 |
| A03 Shigellosis                         | <5 | <0.01 |
| A03.0 Shigellosis due to Shigella dys.. | <5 | <0.01 |
| A03.2 Shigellosis due to Shigella boy.. | <5 | <0.01 |
| A15.3 Tuberculosis of lung, confirmed.. | <5 | <0.01 |
| A15.4 Tuberculosis of intrathoracic l.. | <5 | <0.01 |
| A15.5 Tuberculosis of larynx, trachea.. | <5 | <0.01 |
| A15.7 Primary respiratory tuberculosi.. | <5 | <0.01 |
| A15.8 Other respiratory tuberculosis,.. | <5 | <0.01 |
| A15.9 Respiratory tuberculosis unspec.. | <5 | <0.01 |
| A16.1 Tuberculosis of lung, bacteriol.. | <5 | <0.01 |
| A16.3 Tuberculosis of intrathoracic l.. | <5 | <0.01 |
| A16.4 Tuberculosis of larynx, trachea.. | <5 | <0.01 |
| A16.7 Primary respiratory tuberculosi.. | <5 | <0.01 |
| A16.8 Other respiratory tuberculosis,.. | <5 | <0.01 |
| A17.0 Tuberculous meningitis            | <5 | <0.01 |
| A17.8 Other tuberculosis of nervous s.. | <5 | <0.01 |
| A17.9 Tuberculosis of nervous system,.. | <5 | <0.01 |
| A18.8 Tuberculosis of other specified.. | <5 | <0.01 |
| A19.0 Acute miliary tuberculosis of a.. | <5 | <0.01 |
| A19.2 Acute miliary tuberculosis, uns.. | <5 | <0.01 |
| A19.9 Miliary tuberculosis, unspecified | <5 | <0.01 |
| A20.9 Plague, unspecified               | <5 | <0.01 |
| A21.1 Oculoglandular tularaemia         | <5 | <0.01 |
| A21.2 Pulmonary tularaemia              | <5 | <0.01 |
| A21.7 Generalized tularaemia            | <5 | <0.01 |
| A21.8 Other forms of tularaemia         | <5 | <0.01 |
| A22.0 Cutaneous anthrax                 | <5 | <0.01 |
| A22.2 Gastrointestinal anthrax          | <5 | <0.01 |
| A23.9 Brucellosis, unspecified          | <5 | <0.01 |
| A24.0 Glanders                          | <5 | <0.01 |
| A25.9 Rat-bite fever, unspecified       | <5 | <0.01 |
| A27 Leptospirosis                       | <5 | <0.01 |
| A27.0 Leptospirosis icterohaemorrhagica | <5 | <0.01 |
| A27.8 Other forms of leptospirosis      | <5 | <0.01 |
| A27.9 Leptospirosis, unspecified        | <5 | <0.01 |
| A28.2 Extraintestinal yersiniosis       | <5 | <0.01 |
| A28.8 Other specified zoonotic bacter.. | <5 | <0.01 |
| A28.9 Zoonotic bacterial disease, uns.. | <5 | <0.01 |

|                                         |    |       |
|-----------------------------------------|----|-------|
| A30 Leprosy [Hansen disease]            | <5 | <0.01 |
| A31.1 Cutaneous mycobacterial infection | <5 | <0.01 |
| A31.8 Other mycobacterial infections    | <5 | <0.01 |
| A32.9 Listeriosis, unspecified          | <5 | <0.01 |
| A35 Other tetanus                       | <5 | <0.01 |
| A36 Diphtheria                          | <5 | <0.01 |
| A39 Meningococcal infection             | <5 | <0.01 |
| A39.8 Other meningococcal infections    | <5 | <0.01 |
| A39.9 Meningococcal infection, unspec.. | <5 | <0.01 |
| A40 Streptococcal sepsis                | <5 | <0.01 |
| A40.2 Sepsis due to streptococcus, gr.. | <5 | <0.01 |
| A41 Other sepsis                        | <5 | <0.01 |
| A41.3 Sepsis due to Haemophilus influ.. | <5 | <0.01 |
| A42 Actinomycosis                       | <5 | <0.01 |
| A42.0 Pulmonary actinomycosis           | <5 | <0.01 |
| A42.1 Abdominal actinomycosis           | <5 | <0.01 |
| A42.2 Cervicofacial actinomycosis       | <5 | <0.01 |
| A42.7 Actinomycotic sepsis              | <5 | <0.01 |
| A42.8 Other forms of actinomycosis      | <5 | <0.01 |
| A42.9 Actinomycosis, unspecified        | <5 | <0.01 |
| A44.1 Cutaneous and mucocutaneous bar.. | <5 | <0.01 |
| A49.2 Haemophilus influenzae infectio.. | <5 | <0.01 |
| A50 Congenital syphilis                 | <5 | <0.01 |
| A50.5 Other late congenital syphilis,.. | <5 | <0.01 |
| A50.9 Congenital syphilis, unspecified  | <5 | <0.01 |
| A51.2 Primary syphilis of other sites   | <5 | <0.01 |
| A51.4 Other secondary syphilis          | <5 | <0.01 |
| A51.5 Early syphilis, latent            | <5 | <0.01 |
| A51.9 Early syphilis, unspecified       | <5 | <0.01 |
| A52.0 Cardiovascular syphilis           | <5 | <0.01 |
| A52.7 Other symptomatic late syphilis   | <5 | <0.01 |
| A52.8 Late syphilis, latent             | <5 | <0.01 |
| A53 Other and unspecified syphilis      | <5 | <0.01 |
| A53.9 Syphilis, unspecified             | <5 | <0.01 |
| A54.4 Gonococcal infection of musculo.. | <5 | <0.01 |
| A54.8 Other gonococcal infections       | <5 | <0.01 |
| A55 Chlamydial lymphogranuloma (vener.. | <5 | <0.01 |
| A66.1 Multiple papillomata and wet cr.. | <5 | <0.01 |
| A66.3 Hyperkeratosis of yaws            | <5 | <0.01 |
| A67 Pinta [carate]                      | <5 | <0.01 |
| A67.1 Intermediate lesions of pinta     | <5 | <0.01 |
| A68 Relapsing fevers                    | <5 | <0.01 |
| A69.0 Necrotizing ulcerative stomatitis | <5 | <0.01 |
| A69.1 Other Vincent infections          | <5 | <0.01 |
| A69.9 Spirochaetal infection, unspeci.. | <5 | <0.01 |
| A70 Chlamydia psittaci infection        | <5 | <0.01 |
| A75.0 Epidemic louse-borne typhus fev.. | <5 | <0.01 |
| A75.9 Typhus fever, unspecified         | <5 | <0.01 |

|                                            |               |            |
|--------------------------------------------|---------------|------------|
| A77.1 Spotted fever due to Rickettsia..    | <5            | <0.01      |
| A77.8 Other spotted fevers                 | <5            | <0.01      |
| A78 Q fever                                | <5            | <0.01      |
| A79.9 Rickettsiosis, unspecified           | <5            | <0.01      |
| B95.1 Streptococcus, group B, as the ..    | <5            | <0.01      |
| B95.3 Streptococcus pneumoniae as the..    | <5            | <0.01      |
| B95.4 Other streptococcus as the caus..    | <5            | <0.01      |
| B95.7 Other staphylococcus as the cau..    | <5            | <0.01      |
| B96.1 Klebsiella pneumoniae [K. pneum..    | <5            | <0.01      |
| B96.3 Haemophilus influenzae [H. infl..    | <5            | <0.01      |
| B96.5 Pseudomonas (aeruginosa) as the..    | <5            | <0.01      |
| D73.3 Abscess of spleen                    | <5            | <0.01      |
| G00.3 Staphylococcal meningitis            | <5            | <0.01      |
| G04.2 Bacterial meningoencephalitis a..    | <5            | <0.01      |
| G06 Intracranial and intraspinal abscess.. | <5            | <0.01      |
| G06.2 Extradural and subdural abscess..    | <5            | <0.01      |
| H60.2 Malignant otitis externa             | <5            | <0.01      |
| I32.0 Pericarditis in bacterial disea..    | <5            | <0.01      |
| I41.0 Myocarditis in bacterial diseas..    | <5            | <0.01      |
| I52.0 Other heart disorders in bacter..    | <5            | <0.01      |
| J15.1 Pneumonia due to Pseudomonas         | <5            | <0.01      |
| J15.3 Pneumonia due to streptococcus,..    | <5            | <0.01      |
| J15.4 Pneumonia due to other streptoc..    | <5            | <0.01      |
| J15.5 Pneumonia due to Escherichia coli    | <5            | <0.01      |
| J15.6 Pneumonia due to other aerobic ..    | <5            | <0.01      |
| J17.0 Pneumonia in bacterial diseases..    | <5            | <0.01      |
| J18.2 Hypostatic pneumonia, unspecified    | <5            | <0.01      |
| K23.0 Tuberculous oesophagitis             | <5            | <0.01      |
| K61.4 Intrasphincteric abscess             | <5            | <0.01      |
| K67.3 Tuberculous peritonitis              | <5            | <0.01      |
| M00.8 Arthritis and polyarthritis due..    | <5            | <0.01      |
| M01.0 Meningococcal arthritis              | <5            | <0.01      |
| M01.1 Tuberculous arthritis                | <5            | <0.01      |
| M46.5 Other infective spondylopathies      | <5            | <0.01      |
| M49.0 Tuberculosis of spine                | <5            | <0.01      |
| M49.1 Brucella spondylitis                 | <5            | <0.01      |
| M63.0 Myositis in bacterial diseases ..    | <5            | <0.01      |
| M72.6 Necrotizing fasciitis                | <5            | <0.01      |
| M86.3 Chronic multifocal osteomyelitis     | <5            | <0.01      |
| M86.4 Chronic osteomyelitis with drain..   | <5            | <0.01      |
| O98.1 Syphilis complicating pregnancy..    | <5            | <0.01      |
| P36.9 Bacterial sepsis of newborn, un..    | <5            | <0.01      |
| P39.0 Neonatal infective mastitis          | <5            | <0.01      |
| <b>Total</b>                               | <b>50 938</b> | <b>100</b> |



**eTable 10. Distribution of localised bacterial infections in primary analysis (Finnish multicohort sample)**

| ICD-10 code and description             | N    | %     |
|-----------------------------------------|------|-------|
| A09 Other gastroenteritis and colitis.. | 6929 | 26.05 |
| J03.9 Acute tonsillitis, unspecified    | 3647 | 13.71 |
| J01.0 Acute maxillary sinusitis         | 1530 | 5.75  |
| N39.0 Urinary tract infection, site n.. | 1518 | 5.71  |
| J03.0 Streptococcal tonsillitis         | 1147 | 4.31  |
| J22 Unspecified acute lower respirato.. | 931  | 3.50  |
| J02.9 Acute pharyngitis, unspecified    | 804  | 3.02  |
| J04.0 Acute laryngitis                  | 742  | 2.79  |
| N30.0 Acute cystitis                    | 645  | 2.42  |
| A04.7 Enterocolitis due to Clostridiu.. | 555  | 2.09  |
| L05.9 Pilonidal cyst without abscess    | 479  | 1.80  |
| K05.3 Chronic periodontitis             | 413  | 1.55  |
| H66.0 Acute suppurative otitis media    | 370  | 1.39  |
| K04.7 Periapical abscess without sinus  | 333  | 1.25  |
| K04.5 Chronic apical periodontitis      | 273  | 1.03  |
| L04 Acute lymphadenitis                 | 262  | 0.98  |
| A04.5 Campylobacter enteritis           | 253  | 0.95  |
| L03.0 Cellulitis of finger and toe      | 244  | 0.92  |
| L02.4 Cutaneous abscess, furuncle and.. | 243  | 0.91  |
| K02.1 Caries of dentine                 | 240  | 0.90  |
| O23.5 Infections of the genital tract.. | 206  | 0.77  |
| O86.0 Infection of obstetric surgical.. | 195  | 0.73  |
| L08.9 Local infection of skin and sub.. | 194  | 0.73  |
| O23.9 Other and unspecified genitouri.. | 187  | 0.70  |
| L02 Cutaneous abscess, furuncle and c.. | 186  | 0.70  |
| O86.1 Other infection of genital trac.. | 163  | 0.61  |
| L03.1 Cellulitis of other parts of limb | 157  | 0.59  |
| L05.0 Pilonidal cyst with abscess       | 150  | 0.56  |
| L02.2 Cutaneous abscess, furuncle and.. | 144  | 0.54  |
| O86.4 Pyrexia of unknown origin follo.. | 141  | 0.53  |
| K05.2 Acute periodontitis               | 140  | 0.53  |
| L04.0 Acute lymphadenitis of face, he.. | 127  | 0.48  |
| L02.3 Cutaneous abscess, furuncle and.. | 119  | 0.45  |
| L03.9 Cellulitis, unspecified           | 116  | 0.44  |
| A04.9 Bacterial intestinal infection,.. | 113  | 0.42  |
| K02 Dental caries                       | 113  | 0.42  |
| O23.4 Unspecified infection of urinar.. | 104  | 0.39  |
| H10.0 Mucopurulent conjunctivitis       | 102  | 0.38  |
| O23.1 Infections of bladder in pregna.. | 101  | 0.38  |
| H60.3 Other infective otitis externa    | 96   | 0.36  |
| O86.2 Urinary tract infection followi.. | 95   | 0.36  |
| L08.8 Other specified local infection.. | 92   | 0.35  |
| N41.0 Acute prostatitis                 | 91   | 0.34  |
| A54.9 Gonococcal infection, unspecified | 89   | 0.33  |

|                                         |    |      |
|-----------------------------------------|----|------|
| H00.1 Chalazion                         | 87 | 0.33 |
| A54.2 Gonococcal pelviperitonitis and.. | 86 | 0.32 |
| L02.9 Cutaneous abscess, furuncle and.. | 82 | 0.31 |
| O98.8 Other maternal infectious and p.. | 80 | 0.30 |
| A04.8 Other specified bacterial intes.. | 77 | 0.29 |
| O86.8 Other specified puerperal infec.. | 77 | 0.29 |
| K04.6 Periapical abscess with sinus     | 74 | 0.28 |
| L02.1 Cutaneous abscess, furuncle and.. | 69 | 0.26 |
| J20.0 Acute bronchitis due to Mycopla.. | 64 | 0.24 |
| O98.3 Other infections with a predomi.. | 53 | 0.20 |
| H00.0 Hordeolum and other deep inflam.. | 52 | 0.20 |
| L02.0 Cutaneous abscess, furuncle and.. | 52 | 0.20 |
| A56.0 Chlamydial infection of lower g.. | 51 | 0.19 |
| J02.0 Streptococcal pharyngitis         | 51 | 0.19 |
| K02.9 Dental caries, unspecified        | 49 | 0.18 |
| L03.2 Cellulitis of face                | 48 | 0.18 |
| L08.0 Pyoderma                          | 48 | 0.18 |
| L02.8 Cutaneous abscess, furuncle and.. | 47 | 0.18 |
| A04.6 Enteritis due to Yersinia enter.. | 44 | 0.17 |
| J04.2 Acute laryngotracheitis           | 43 | 0.16 |
| L03.3 Cellulitis of trunk               | 39 | 0.15 |
| A37 Whooping cough                      | 32 | 0.12 |
| A05.9 Bacterial foodborne intoxicatio.. | 31 | 0.12 |
| N76.0 Acute vaginitis                   | 31 | 0.12 |
| O98.9 Unspecified maternal infectious.. | 30 | 0.11 |
| L01.0 Impetigo [any organism] [any si.. | 26 | 0.10 |
| K11.3 Abscess of salivary gland         | 25 | 0.09 |
| O86.3 Other genitourinary tract infec.. | 25 | 0.09 |
| K04.4 Acute apical periodontitis of p.. | 24 | 0.09 |
| L03.8 Cellulitis of other sites         | 23 | 0.09 |
| A54.1 Gonococcal infection of lower g.. | 22 | 0.08 |
| J04.1 Acute tracheitis                  | 20 | 0.08 |
| O91.0 Infection of nipple associated .. | 18 | 0.07 |
| J03.8 Acute tonsillitis due to other .. | 17 | 0.06 |
| A64 Unspecified sexually transmitted .. | 14 | 0.05 |
| L04.9 Acute lymphadenitis, unspecified  | 14 | 0.05 |
| L01 Impetigo                            | 12 | 0.05 |
| L70.1 Acne conglobata                   | 12 | 0.05 |
| K02.8 Other dental caries               | 11 | 0.04 |
| K05.0 Acute gingivitis                  | 11 | 0.04 |
| A54.0 Gonococcal infection of lower g.. | 10 | 0.04 |
| L01.1 Impetiginization of other derma.. | 10 | 0.04 |
| A04.3 Enterohaemorrhagic Escherichia .. | 9  | 0.03 |
| J20.1 Acute bronchitis due to Haemoph.. | 9  | 0.03 |
| H10.5 Blepharoconjunctivitis            | 7  | 0.03 |
| L04.3 Acute lymphadenitis of lower limb | 7  | 0.03 |
| L04.8 Acute lymphadenitis of other si.. | 6  | 0.02 |
| O23.3 Infections of other parts of ur.. | 6  | 0.02 |

|                                         |               |            |
|-----------------------------------------|---------------|------------|
| A04.0 Enteropathogenic Escherichia co.. | 5             | 0.02       |
| A05.0 Foodborne staphylococcal intoxi.. | 5             | 0.02       |
| A05.8 Other specified bacterial foodb.. | 5             | 0.02       |
| H01.0 Blepharitis                       | 5             | 0.02       |
| L04.2 Acute lymphadenitis of upper limb | 5             | 0.02       |
| A00.9 Cholera, unspecified              | <5            | <0.02      |
| A04 Other bacterial intestinal infect.. | <5            | <0.02      |
| A04.1 Enterotoxigenic Escherichia col.. | <5            | <0.02      |
| A04.2 Enteroinvasive Escherichia coli.. | <5            | <0.02      |
| A04.4 Other intestinal Escherichia co.. | <5            | <0.02      |
| A05.1 Botulism                          | <5            | <0.02      |
| A05.2 Foodborne Clostridium perfringe.. | <5            | <0.02      |
| A26.0 Cutaneous erysipeloid             | <5            | <0.02      |
| A26.9 Erysipeloid, unspecified          | <5            | <0.02      |
| A37.0 Whooping cough due to Bordetell.. | <5            | <0.02      |
| A37.9 Whooping cough, unspecified       | <5            | <0.02      |
| A54 Gonococcal infection                | <5            | <0.02      |
| A54.3 Gonococcal infection of eye       | <5            | <0.02      |
| A54.4 Gonococcal infection of musculo.. | <5            | <0.02      |
| A54.8 Other gonococcal infections       | <5            | <0.02      |
| A56.3 Chlamydial infection of anus an.. | <5            | <0.02      |
| A58 Granuloma inguinale                 | <5            | <0.02      |
| A71 Trachoma                            | <5            | <0.02      |
| J02.8 Acute pharyngitis due to other .. | <5            | <0.02      |
| J03 Acute tonsillitis                   | <5            | <0.02      |
| J20.2 Acute bronchitis due to strepto.. | <5            | <0.02      |
| K02.0 Caries limited to enamel          | <5            | <0.02      |
| K02.2 Caries of cementum                | <5            | <0.02      |
| K02.3 Arrested dental caries            | <5            | <0.02      |
| L00 Staphylococcal scalded skin syndr.. | <5            | <0.02      |
| L04.1 Acute lymphadenitis of trunk      | <5            | <0.02      |
| L08.1 Erythrasma                        | <5            | <0.02      |
| O23.2 Infections of urethra in pregna.. | <5            | <0.02      |
| P39.1 Neonatal conjunctivitis and dac.. | <5            | <0.02      |
| <b>Total</b>                            | <b>26 601</b> | <b>100</b> |

**eTable 11. Distribution of bacterial infections with sepsis in primary analysis (Finnish multicohort sample)**

| ICD-10 code and description             | N   | %     |
|-----------------------------------------|-----|-------|
| A41.5 Sepsis due to other Gram-negati.. | 850 | 29.11 |
| A41.9 Sepsis, unspecified               | 619 | 21.20 |
| A41.0 Sepsis due to Staphylococcus au.. | 381 | 13.05 |
| A41.8 Other specified sepsis            | 269 | 9.21  |
| A40.3 Sepsis due to Streptococcus pne.. | 256 | 8.77  |
| A40.8 Other streptococcal sepsis        | 112 | 3.84  |
| A40.0 Sepsis due to streptococcus, gr.. | 85  | 2.91  |
| A40.9 Streptococcal sepsis, unspecified | 74  | 2.53  |

|                                         |              |            |
|-----------------------------------------|--------------|------------|
| A41.1 Sepsis due to other specified s.. | 72           | 2.47       |
| A02.1 Salmonella sepsis                 | 41           | 1.40       |
| A40.1 Sepsis due to streptococcus, gr.. | 40           | 1.37       |
| A41.2 Sepsis due to unspecified staph.. | 37           | 1.27       |
| A41.4 Sepsis due to anaerobes           | 26           | 0.89       |
| A39.2 Acute meningococcaemia            | 14           | 0.48       |
| A32.7 Listerial sepsis                  | 13           | 0.45       |
| A39.4 Meningococcaemia, unspecified     | 10           | 0.34       |
| A41.3 Sepsis due to Haemophilus influ.. | 7            | 0.24       |
| A21.7 Generalized tularaemia            | <5           | <0.17      |
| A39.1 Waterhouse-Friderichsen syndrome  | <5           | <0.17      |
| A40 Streptococcal sepsis                | <5           | <0.17      |
| A40.2 Sepsis due to streptococcus, gr.. | <5           | <0.17      |
| A41 Other sepsis                        | <5           | <0.17      |
| A42.7 Actinomycotic sepsis              | <5           | <0.17      |
| A48.3 Toxic shock syndrome              | <5           | <0.17      |
| P36.9 Bacterial sepsis of newborn, un.. | <5           | <0.17      |
| <b>Total</b>                            | <b>2 920</b> | <b>100</b> |

**eTable 12. Distribution of bacterial infections without sepsis in primary analysis (Finnish multicohort sample)**

| ICD-10 code and description             | N      | %     |
|-----------------------------------------|--------|-------|
| K35 Acute appendicitis                  | 12 215 | 17.92 |
| J18.9 Pneumonia, unspecified            | 6530   | 9.58  |
| A09 Other gastroenteritis and colitis.. | 5950   | 8.73  |
| N10 Acute tubulo-interstitial nephritis | 3844   | 5.64  |
| J03.9 Acute tonsillitis, unspecified    | 3310   | 4.86  |
| A46 Erysipelas                          | 3274   | 4.80  |
| J36 Peritonsillar abscess               | 3151   | 4.62  |
| J15.9 Bacterial pneumonia, unspecified  | 2402   | 3.52  |
| N70.0 Acute salpingitis and oophoritis  | 1992   | 2.92  |
| O85 Puerperal sepsis                    | 1763   | 2.59  |
| J01.0 Acute maxillary sinusitis         | 1146   | 1.68  |
| N39.0 Urinary tract infection, site n.. | 1131   | 1.66  |
| A49.9 Bacterial infection, unspecified  | 1124   | 1.65  |
| J03.0 Streptococcal tonsillitis         | 1011   | 1.48  |
| J22 Unspecified acute lower respirato.. | 804    | 1.18  |
| N71.0 Acute inflammatory disease of u.. | 739    | 1.08  |
| J02.9 Acute pharyngitis, unspecified    | 733    | 1.08  |
| J04.0 Acute laryngitis                  | 704    | 1.03  |
| K57.2 Diverticular disease of large i.. | 467    | 0.69  |
| N30.0 Acute cystitis                    | 462    | 0.68  |
| J18.0 Bronchopneumonia, unspecified     | 458    | 0.67  |
| L05.9 Pilonidal cyst without abscess    | 418    | 0.61  |
| O08.0 Genital tract and pelvic infect.. | 379    | 0.56  |
| O03.5 Spontaneous abortion: Complete .. | 370    | 0.54  |
| K05.3 Chronic periodontitis             | 349    | 0.51  |

|                                         |     |      |
|-----------------------------------------|-----|------|
| K61.0 Anal abscess                      | 349 | 0.51 |
| A04.7 Enterocolitis due to Clostridiu.. | 338 | 0.50 |
| H66.0 Acute suppurative otitis media    | 326 | 0.48 |
| J13 Pneumonia due to Streptococcus pn.. | 313 | 0.46 |
| N75.1 Abscess of Bartholin gland        | 309 | 0.45 |
| K04.7 Periapical abscess without sinus  | 275 | 0.40 |
| N61 Inflammatory disorders of breast    | 267 | 0.39 |
| A69.2 Lyme disease                      | 249 | 0.37 |
| L04 Acute lymphadenitis                 | 236 | 0.35 |
| M00.9 Pyogenic arthritis, unspecified   | 223 | 0.33 |
| N45.9 Orchitis, epididymitis and epid.. | 218 | 0.32 |
| L03.0 Cellulitis of finger and toe      | 214 | 0.31 |
| K04.5 Chronic apical periodontitis      | 213 | 0.31 |
| A04.5 Campylobacter enteritis           | 208 | 0.31 |
| K65.0 Acute peritonitis                 | 193 | 0.28 |
| O23.0 Infections of kidney in pregnancy | 184 | 0.27 |
| K12.2 Cellulitis and abscess of mouth   | 181 | 0.27 |
| K02.1 Caries of dentine                 | 180 | 0.26 |
| K61 Abscess of anal and rectal regions  | 180 | 0.26 |
| O23.5 Infections of the genital tract.. | 180 | 0.26 |
| O03.0 Spontaneous abortion: Incomplet.. | 179 | 0.26 |
| J05.1 Acute epiglottitis                | 176 | 0.26 |
| L08.9 Local infection of skin and sub.. | 176 | 0.26 |
| L02 Cutaneous abscess, furuncle and c.. | 171 | 0.25 |
| O86.0 Infection of obstetric surgical.. | 171 | 0.25 |
| A02.0 Salmonella enteritis              | 168 | 0.25 |
| O23.9 Other and unspecified genitouri.. | 162 | 0.24 |
| L02.4 Cutaneous abscess, furuncle and.. | 156 | 0.23 |
| J15.8 Other bacterial pneumonia         | 153 | 0.22 |
| O86.1 Other infection of genital trac.. | 139 | 0.20 |
| A16.2 Tuberculosis of lung, without m.. | 136 | 0.20 |
| G00.9 Bacterial meningitis, unspecified | 130 | 0.19 |
| L05.0 Pilonidal cyst with abscess       | 130 | 0.19 |
| O86.4 Pyrexia of unknown origin follo.. | 126 | 0.18 |
| K05.2 Acute periodontitis               | 125 | 0.18 |
| J18.1 Lobar pneumonia, unspecified      | 119 | 0.17 |
| A02 Other salmonella infections         | 112 | 0.16 |
| K02 Dental caries                       | 108 | 0.16 |
| L04.0 Acute lymphadenitis of face, he.. | 103 | 0.15 |
| L03.1 Cellulitis of other parts of limb | 102 | 0.15 |
| A56.1 Chlamydial infection of pelvipe.. | 100 | 0.15 |
| L02.2 Cutaneous abscess, furuncle and.. | 98  | 0.14 |
| J15.7 Pneumonia due to Mycoplasma pne.. | 96  | 0.14 |
| O04.0 Medical abortion: Incomplete, c.. | 94  | 0.14 |
| O23.4 Unspecified infection of urinar.. | 93  | 0.14 |
| A49.8 Other bacterial infections of u.. | 92  | 0.13 |
| J86.9 Pyothorax without fistula         | 92  | 0.13 |
| A04.9 Bacterial intestinal infection,.. | 91  | 0.13 |

|                                         |    |      |
|-----------------------------------------|----|------|
| I33.0 Acute and subacute infective en.. | 91 | 0.13 |
| H10.0 Mucopurulent conjunctivitis       | 88 | 0.13 |
| O23.1 Infections of bladder in pregna.. | 85 | 0.12 |
| H00.1 Chalazion                         | 84 | 0.12 |
| L02.3 Cutaneous abscess, furuncle and.. | 84 | 0.12 |
| A15.0 Tuberculosis of lung, confirmed.. | 81 | 0.12 |
| M71.1 Other infective bursitis          | 81 | 0.12 |
| H60.3 Other infective otitis externa    | 79 | 0.12 |
| J16.8 Pneumonia due to other specifie.. | 79 | 0.12 |
| O86.2 Urinary tract infection followi.. | 78 | 0.11 |
| L03.9 Cellulitis, unspecified           | 76 | 0.11 |
| A54.9 Gonococcal infection, unspecified | 75 | 0.11 |
| L08.8 Other specified local infection.. | 74 | 0.11 |
| N41.0 Acute prostatitis                 | 74 | 0.11 |
| M86.9 Osteomyelitis, unspecified        | 72 | 0.11 |
| N76.4 Abscess of vulva                  | 71 | 0.10 |
| J39.0 Retropharyngeal and parapharyng.. | 70 | 0.10 |
| O04.5 Medical abortion: Complete or u.. | 68 | 0.10 |
| K04.6 Periapical abscess with sinus     | 67 | 0.10 |
| K57.0 Diverticular disease of small i.. | 67 | 0.10 |
| M86.1 Other acute osteomyelitis         | 64 | 0.09 |
| O86.8 Other specified puerperal infec.. | 63 | 0.09 |
| A04.8 Other specified bacterial intes.. | 62 | 0.09 |
| O75.3 Other infection during labour     | 62 | 0.09 |
| O98.8 Other maternal infectious and p.. | 62 | 0.09 |
| A54.2 Gonococcal pelviperitonitis and.. | 58 | 0.09 |
| H62.0 Otitis externa in bacterial dis.. | 58 | 0.09 |
| L02.1 Cutaneous abscess, furuncle and.. | 57 | 0.08 |
| L02.9 Cutaneous abscess, furuncle and.. | 56 | 0.08 |
| A74.9 Chlamydial infection, unspecified | 55 | 0.08 |
| N73.3 Female acute pelvic peritonitis   | 53 | 0.08 |
| A38 Scarlet fever                       | 51 | 0.07 |
| O91.1 Abscess of breast associated wi.. | 51 | 0.07 |
| H00.0 Hordeolum and other deep inflam.. | 47 | 0.07 |
| H05.0 Acute inflammation of orbit       | 46 | 0.07 |
| A56.0 Chlamydial infection of lower g.. | 45 | 0.07 |
| J20.0 Acute bronchitis due to Mycopla.. | 44 | 0.06 |
| O98.3 Other infections with a predomi.. | 43 | 0.06 |
| J02.0 Streptococcal pharyngitis         | 42 | 0.06 |
| J18.8 Other pneumonia, organism unspe.. | 42 | 0.06 |
| L03.2 Cellulitis of face                | 42 | 0.06 |
| A18.2 Tuberculous peripheral lymphade.. | 41 | 0.06 |
| G00.8 Other bacterial meningitis        | 41 | 0.06 |
| L02.0 Cutaneous abscess, furuncle and.. | 41 | 0.06 |
| K02.9 Dental caries, unspecified        | 40 | 0.06 |
| K61.1 Rectal abscess                    | 40 | 0.06 |
| M71.0 Abscess of bursa                  | 39 | 0.06 |
| L08.0 Pyoderma                          | 38 | 0.06 |

|                                          |    |      |
|------------------------------------------|----|------|
| A49.0 Staphylococcal infection, unspe..  | 37 | 0.05 |
| J04.2 Acute laryngotracheitis            | 37 | 0.05 |
| A04.6 Enteritis due to Yersinia enter..  | 35 | 0.05 |
| L02.8 Cutaneous abscess, furuncle and..  | 35 | 0.05 |
| H60.1 Cellulitis of external ear         | 33 | 0.05 |
| H70.0 Acute mastoiditis                  | 33 | 0.05 |
| M86.6 Other chronic osteomyelitis        | 33 | 0.05 |
| A39.0 Meningococcal meningitis           | 32 | 0.05 |
| M00.0 Staphylococcal arthritis and po..  | 31 | 0.05 |
| A16.5 Tuberculous pleurisy, without m..  | 30 | 0.04 |
| G00.0 Haemophilus meningitis             | 30 | 0.04 |
| G00.1 Pneumococcal meningitis            | 30 | 0.04 |
| H60.0 Abscess of external ear            | 30 | 0.04 |
| K75.0 Abscess of liver                   | 29 | 0.04 |
| N73.0 Acute parametritis and pelvic c..  | 29 | 0.04 |
| A37 Whooping cough                       | 28 | 0.04 |
| J85.2 Abscess of lung without pneumonia  | 28 | 0.04 |
| K63.0 Abscess of intestine               | 27 | 0.04 |
| H44.0 Purulent endophthalmitis           | 26 | 0.04 |
| A05.9 Bacterial foodborne intoxicatio..  | 25 | 0.04 |
| J86.0 Pyothorax with fistula             | 25 | 0.04 |
| L03.3 Cellulitis of trunk                | 24 | 0.04 |
| O86.3 Other genitourinary tract infec..  | 23 | 0.03 |
| O98.9 Unspecified maternal infectious..  | 23 | 0.03 |
| A21.9 Tularaemia, unspecified            | 22 | 0.03 |
| G06.0 Intracranial abscess and granul..  | 22 | 0.03 |
| K11.3 Abscess of salivary gland          | 22 | 0.03 |
| M65.0 Abscess of tendon sheath           | 22 | 0.03 |
| A18.0 Tuberculosis of bones and joints   | 21 | 0.03 |
| A21.0 Ulceroglandular tularaemia         | 21 | 0.03 |
| G01 Meningitis in bacterial diseases ..  | 21 | 0.03 |
| K61.2 Anorectal abscess                  | 21 | 0.03 |
| N76.0 Acute vaginitis                    | 21 | 0.03 |
| A54.1 Gonococcal infection of lower g..  | 20 | 0.03 |
| K04.4 Acute apical periodontitis of p..  | 20 | 0.03 |
| M46.3 Infection of intervertebral dis..  | 20 | 0.03 |
| A48.8 Other specified bacterial disea..  | 19 | 0.03 |
| N15.1 Renal and perinephric abscess      | 19 | 0.03 |
| G06.1 Intraspinial abscess and granuloma | 18 | 0.03 |
| J04.1 Acute tracheitis                   | 18 | 0.03 |
| J86 Pyothorax                            | 18 | 0.03 |
| N74.4 Female chlamydial pelvic inflam..  | 18 | 0.03 |
| A02.9 Salmonella infection, unspecified  | 17 | 0.02 |
| A15.1 Tuberculosis of lung, confirmed..  | 16 | 0.02 |
| L01.0 Impetigo [any organism] [any si..  | 16 | 0.02 |
| N45.0 Orchitis, epididymitis and epid..  | 16 | 0.02 |
| A51.0 Primary genital syphilis           | 15 | 0.02 |
| J03.8 Acute tonsillitis due to other ..  | 15 | 0.02 |

|                                         |    |      |
|-----------------------------------------|----|------|
| L03.8 Cellulitis of other sites         | 15 | 0.02 |
| O91.0 Infection of nipple associated .. | 15 | 0.02 |
| A01.4 Paratyphoid fever, unspecified    | 14 | 0.02 |
| A03.3 Shigellosis due to Shigella son.. | 14 | 0.02 |
| A51.3 Secondary syphilis of skin and .. | 14 | 0.02 |
| K57.4 Diverticular disease of both sm.. | 14 | 0.02 |
| N34.0 Urethral abscess                  | 14 | 0.02 |
| J85.1 Abscess of lung with pneumonia    | 13 | 0.02 |
| A64 Unspecified sexually transmitted .. | 12 | 0.02 |
| L01 Impetigo                            | 12 | 0.02 |
| L70.1 Acne conglobata                   | 12 | 0.02 |
| O06.5 Unspecified abortion: Complete .. | 12 | 0.02 |
| A01.2 Paratyphoid fever B               | 11 | 0.02 |
| J14 Pneumonia due to Haemophilus infl.. | 11 | 0.02 |
| L04.9 Acute lymphadenitis, unspecified  | 11 | 0.02 |
| M00.2 Other streptococcal arthritis a.. | 11 | 0.02 |
| M46.2 Osteomyelitis of vertebra         | 11 | 0.02 |
| A03.1 Shigellosis due to Shigella fle.. | 10 | 0.01 |
| A49.1 Streptococcal infection, unspec.. | 10 | 0.01 |
| J16.0 Chlamydial pneumonia              | 10 | 0.01 |
| K61.3 Ischiorectal abscess              | 10 | 0.01 |
| L01.1 Impetiginization of other derma.. | 10 | 0.01 |
| M01.2 Arthritis in Lyme disease         | 10 | 0.01 |
| N13.6 Pyonephrosis                      | 10 | 0.01 |
| A02.8 Other specified salmonella infe.. | 9  | 0.01 |
| J39.1 Other abscess of pharynx          | 9  | 0.01 |
| A01.0 Typhoid fever                     | 8  | 0.01 |
| A02.2 Localized salmonella infections   | 8  | 0.01 |
| A15.6 Tuberculous pleurisy, confirmed.. | 8  | 0.01 |
| A16.0 Tuberculosis of lung, bacteriol.. | 8  | 0.01 |
| A16.9 Respiratory tuberculosis unspec.. | 8  | 0.01 |
| A18.1 Tuberculosis of genitourinary s.. | 8  | 0.01 |
| A31.0 Pulmonary mycobacterial infection | 8  | 0.01 |
| A32.8 Other forms of listeriosis        | 8  | 0.01 |
| J15.2 Pneumonia due to staphylococcus   | 8  | 0.01 |
| K02.8 Other dental caries               | 8  | 0.01 |
| O07.0 Failed medical abortion, compli.. | 8  | 0.01 |
| O07.5 Other and unspecified failed at.. | 8  | 0.01 |
| A04.3 Enterohaemorrhagic Escherichia .. | 7  | 0.01 |
| A18.3 Tuberculosis of intestines, per.. | 7  | 0.01 |
| A74.8 Other chlamydial diseases         | 7  | 0.01 |
| J20.1 Acute bronchitis due to Haemoph.. | 7  | 0.01 |
| K05.0 Acute gingivitis                  | 7  | 0.01 |
| M65.1 Other infective (teno)synovitis   | 7  | 0.01 |
| O05.0 Other abortion: Incomplete, com.. | 7  | 0.01 |
| O05.5 Other abortion: Complete or uns.. | 7  | 0.01 |
| O06.0 Unspecified abortion: Incomplet.. | 7  | 0.01 |
| A31 Infection due to other mycobacteria | 6  | 0.01 |



|                                         |    |       |
|-----------------------------------------|----|-------|
| A48.0 Gas gangrene                      | 6  | 0.01  |
| A52.1 Symptomatic neurosyphilis         | 6  | 0.01  |
| A54.0 Gonococcal infection of lower g.. | 6  | 0.01  |
| B95.6 Staphylococcus aureus as the ca.. | 6  | 0.01  |
| B96.2 Escherichia coli [E. coli] as t.. | 6  | 0.01  |
| H10.5 Blepharconjunctivitis             | 6  | 0.01  |
| J15.0 Pneumonia due to Klebsiella pne.. | 6  | 0.01  |
| J85.3 Abscess of mediastinum            | 6  | 0.01  |
| A03.9 Shigellosis, unspecified          | 5  | 0.01  |
| A15.2 Tuberculosis of lung, confirmed.. | 5  | 0.01  |
| A18.4 Tuberculosis of skin and subcut.. | 5  | 0.01  |
| A31.9 Mycobacterial infection, unspec.. | 5  | 0.01  |
| B95.8 Unspecified staphylococcus as t.. | 5  | 0.01  |
| G05.0 Encephalitis, myelitis and ence.. | 5  | 0.01  |
| J15.4 Pneumonia due to other streptoc.. | 5  | 0.01  |
| K57.8 Diverticular disease of intesti.. | 5  | 0.01  |
| L04.2 Acute lymphadenitis of upper limb | 5  | 0.01  |
| L04.8 Acute lymphadenitis of other si.. | 5  | 0.01  |
| M01.3 Arthritis in other bacterial di.. | 5  | 0.01  |
| M86.0 Acute haematogenous osteomyelitis | 5  | 0.01  |
| M86.2 Subacute osteomyelitis            | 5  | 0.01  |
| A00.9 Cholera, unspecified              | <5 | <0.01 |
| A01.1 Paratyphoid fever A               | <5 | <0.01 |
| A01.3 Paratyphoid fever C               | <5 | <0.01 |
| A03 Shigellosis                         | <5 | <0.01 |
| A03.0 Shigellosis due to Shigella dys.. | <5 | <0.01 |
| A03.2 Shigellosis due to Shigella boy.. | <5 | <0.01 |
| A04 Other bacterial intestinal infect.. | <5 | <0.01 |
| A04.0 Enteropathogenic Escherichia co.. | <5 | <0.01 |
| A04.1 Enterotoxigenic Escherichia col.. | <5 | <0.01 |
| A04.2 Enteroinvasive Escherichia coli.. | <5 | <0.01 |
| A04.4 Other intestinal Escherichia co.. | <5 | <0.01 |
| A05.0 Foodborne staphylococcal intoxi.. | <5 | <0.01 |
| A05.1 Botulism                          | <5 | <0.01 |
| A05.2 Foodborne Clostridium perfringe.. | <5 | <0.01 |
| A05.8 Other specified bacterial foodb.. | <5 | <0.01 |
| A15.3 Tuberculosis of lung, confirmed.. | <5 | <0.01 |
| A15.4 Tuberculosis of intrathoracic l.. | <5 | <0.01 |
| A15.5 Tuberculosis of larynx, trachea.. | <5 | <0.01 |
| A15.7 Primary respiratory tuberculosi.. | <5 | <0.01 |
| A15.8 Other respiratory tuberculosis,.. | <5 | <0.01 |
| A15.9 Respiratory tuberculosis unspec.. | <5 | <0.01 |
| A16.1 Tuberculosis of lung, bacteriol.. | <5 | <0.01 |
| A16.3 Tuberculosis of intrathoracic l.. | <5 | <0.01 |
| A16.4 Tuberculosis of larynx, trachea.. | <5 | <0.01 |
| A16.7 Primary respiratory tuberculosi.. | <5 | <0.01 |
| A16.8 Other respiratory tuberculosis,.. | <5 | <0.01 |
| A17.0 Tuberculous meningitis            | <5 | <0.01 |

|                                         |    |       |
|-----------------------------------------|----|-------|
| A17.9 Tuberculosis of nervous system,.. | <5 | <0.01 |
| A18.8 Tuberculosis of other specified.. | <5 | <0.01 |
| A19.0 Acute miliary tuberculosis of a.. | <5 | <0.01 |
| A19.2 Acute miliary tuberculosis, uns.. | <5 | <0.01 |
| A19.9 Miliary tuberculosis, unspecified | <5 | <0.01 |
| A20.9 Plague, unspecified               | <5 | <0.01 |
| A21.1 Oculoglandular tularaemia         | <5 | <0.01 |
| A21.2 Pulmonary tularaemia              | <5 | <0.01 |
| A21.8 Other forms of tularaemia         | <5 | <0.01 |
| A22.0 Cutaneous anthrax                 | <5 | <0.01 |
| A22.2 Gastrointestinal anthrax          | <5 | <0.01 |
| A23.9 Brucellosis, unspecified          | <5 | <0.01 |
| A24.0 Glanders                          | <5 | <0.01 |
| A26.0 Cutaneous erysipeloid             | <5 | <0.01 |
| A26.9 Erysipeloid, unspecified          | <5 | <0.01 |
| A27 Leptospirosis                       | <5 | <0.01 |
| A27.0 Leptospirosis icterohaemorrhagica | <5 | <0.01 |
| A27.8 Other forms of leptospirosis      | <5 | <0.01 |
| A27.9 Leptospirosis, unspecified        | <5 | <0.01 |
| A28.2 Extraintestinal yersiniosis       | <5 | <0.01 |
| A28.8 Other specified zoonotic bacter.. | <5 | <0.01 |
| A28.9 Zoonotic bacterial disease, uns.. | <5 | <0.01 |
| A30 Leprosy [Hansen disease]            | <5 | <0.01 |
| A31.1 Cutaneous mycobacterial infection | <5 | <0.01 |
| A31.8 Other mycobacterial infections    | <5 | <0.01 |
| A32.9 Listeriosis, unspecified          | <5 | <0.01 |
| A35 Other tetanus                       | <5 | <0.01 |
| A36 Diphtheria                          | <5 | <0.01 |
| A37.0 Whooping cough due to Bordetell.. | <5 | <0.01 |
| A37.9 Whooping cough, unspecified       | <5 | <0.01 |
| A39 Meningococcal infection             | <5 | <0.01 |
| A39.8 Other meningococcal infections    | <5 | <0.01 |
| A39.9 Meningococcal infection, unspec.. | <5 | <0.01 |
| A42 Actinomycosis                       | <5 | <0.01 |
| A42.0 Pulmonary actinomycosis           | <5 | <0.01 |
| A42.1 Abdominal actinomycosis           | <5 | <0.01 |
| A42.2 Cervicofacial actinomycosis       | <5 | <0.01 |
| A42.8 Other forms of actinomycosis      | <5 | <0.01 |
| A42.9 Actinomycosis, unspecified        | <5 | <0.01 |
| A44.1 Cutaneous and mucocutaneous bar.. | <5 | <0.01 |
| A49 Bacterial infection of unspecifi..  | <5 | <0.01 |
| A49.2 Haemophilus influenzae infectio.. | <5 | <0.01 |
| A49.3 Mycoplasma infection, unspecifi.. | <5 | <0.01 |
| A50 Congenital syphilis                 | <5 | <0.01 |
| A50.5 Other late congenital syphilis,.. | <5 | <0.01 |
| A50.9 Congenital syphilis, unspecified  | <5 | <0.01 |
| A51.2 Primary syphilis of other sites   | <5 | <0.01 |
| A51.4 Other secondary syphilis          | <5 | <0.01 |

|                                         |    |       |
|-----------------------------------------|----|-------|
| A51.5 Early syphilis, latent            | <5 | <0.01 |
| A51.9 Early syphilis, unspecified       | <5 | <0.01 |
| A52.0 Cardiovascular syphilis           | <5 | <0.01 |
| A52.7 Other symptomatic late syphilis   | <5 | <0.01 |
| A52.8 Late syphilis, latent             | <5 | <0.01 |
| A53 Other and unspecified syphilis      | <5 | <0.01 |
| A53.9 Syphilis, unspecified             | <5 | <0.01 |
| A54 Gonococcal infection                | <5 | <0.01 |
| A54.3 Gonococcal infection of eye       | <5 | <0.01 |
| A54.4 Gonococcal infection of musculo.. | <5 | <0.01 |
| A54.8 Other gonococcal infections       | <5 | <0.01 |
| A55 Chlamydial lymphogranuloma (vener.. | <5 | <0.01 |
| A56.2 Chlamydial infection of genitou.. | <5 | <0.01 |
| A56.3 Chlamydial infection of anus an.. | <5 | <0.01 |
| A56.8 Sexually transmitted chlamydial.. | <5 | <0.01 |
| A58 Granuloma inguinale                 | <5 | <0.01 |
| A66.1 Multiple papillomata and wet cr.. | <5 | <0.01 |
| A66.3 Hyperkeratosis of yaws            | <5 | <0.01 |
| A67 Pinta [carate]                      | <5 | <0.01 |
| A67.1 Intermediate lesions of pinta     | <5 | <0.01 |
| A68 Relapsing fevers                    | <5 | <0.01 |
| A69.0 Necrotizing ulcerative stomatitis | <5 | <0.01 |
| A69.1 Other Vincent infections          | <5 | <0.01 |
| A69.9 Spirochaetal infection, unspeci.. | <5 | <0.01 |
| A70 Chlamydia psittaci infection        | <5 | <0.01 |
| A71 Trachoma                            | <5 | <0.01 |
| A75.0 Epidemic louse-borne typhus fev.. | <5 | <0.01 |
| A75.9 Typhus fever, unspecified         | <5 | <0.01 |
| A77.1 Spotted fever due to Rickettsia.. | <5 | <0.01 |
| A77.8 Other spotted fevers              | <5 | <0.01 |
| A78 Q fever                             | <5 | <0.01 |
| A79.9 Rickettsiosis, unspecified        | <5 | <0.01 |
| B95.0 Streptococcus, group A, as the .. | <5 | <0.01 |
| B95.1 Streptococcus, group B, as the .. | <5 | <0.01 |
| B95.3 Streptococcus pneumoniae as the.. | <5 | <0.01 |
| B95.4 Other streptococcus as the caus.. | <5 | <0.01 |
| B95.5 Unspecified streptococcus as th.. | <5 | <0.01 |
| B95.7 Other staphylococcus as the cau.. | <5 | <0.01 |
| B96.1 Klebsiella pneumoniae [K. pneum.. | <5 | <0.01 |
| B96.3 Haemophilus influenzae [H. infl.. | <5 | <0.01 |
| B96.5 Pseudomonas (aeruginosa) as the.. | <5 | <0.01 |
| B96.7 Clostridium perfringens [C. per.. | <5 | <0.01 |
| B96.8 Other specified bacterial agent.. | <5 | <0.01 |
| D73.3 Abscess of spleen                 | <5 | <0.01 |
| G00.2 Streptococcal meningitis          | <5 | <0.01 |
| G00.3 Staphylococcal meningitis         | <5 | <0.01 |
| G04.2 Bacterial meningoenzephalitis a.. | <5 | <0.01 |
| G06 Intracranial and intraspinal absc.. | <5 | <0.01 |

|                                         |               |            |
|-----------------------------------------|---------------|------------|
| G06.2 Extradural and subdural abscess.. | <5            | <0.01      |
| H01.0 Blepharitis                       | <5            | <0.01      |
| H60.2 Malignant otitis externa          | <5            | <0.01      |
| I32.0 Pericarditis in bacterial disea.. | <5            | <0.01      |
| I41.0 Myocarditis in bacterial diseas.. | <5            | <0.01      |
| J02.8 Acute pharyngitis due to other .. | <5            | <0.01      |
| J03 Acute tonsillitis                   | <5            | <0.01      |
| J15.1 Pneumonia due to Pseudomonas      | <5            | <0.01      |
| J15.3 Pneumonia due to streptococcus,.. | <5            | <0.01      |
| J15.5 Pneumonia due to Escherichia coli | <5            | <0.01      |
| J15.6 Pneumonia due to other aerobic .. | <5            | <0.01      |
| J17.0 Pneumonia in bacterial diseases.. | <5            | <0.01      |
| J17.8 Pneumonia in other diseases cla.. | <5            | <0.01      |
| J18.2 Hypostatic pneumonia, unspecified | <5            | <0.01      |
| J20.2 Acute bronchitis due to strepto.. | <5            | <0.01      |
| K02.0 Caries limited to enamel          | <5            | <0.01      |
| K02.2 Caries of cementum                | <5            | <0.01      |
| K02.3 Arrested dental caries            | <5            | <0.01      |
| K23.0 Tuberculous oesophagitis          | <5            | <0.01      |
| K61.4 Intrasphincteric abscess          | <5            | <0.01      |
| K67.3 Tuberculous peritonitis           | <5            | <0.01      |
| L00 Staphylococcal scalded skin syndr.. | <5            | <0.01      |
| L04.1 Acute lymphadenitis of trunk      | <5            | <0.01      |
| L04.3 Acute lymphadenitis of lower limb | <5            | <0.01      |
| L08.1 Erythrasma                        | <5            | <0.01      |
| M00.8 Arthritis and polyarthritis due.. | <5            | <0.01      |
| M01.0 Meningococcal arthritis           | <5            | <0.01      |
| M01.1 Tuberculous arthritis             | <5            | <0.01      |
| M46.5 Other infective spondylopathies   | <5            | <0.01      |
| M49.0 Tuberculosis of spine             | <5            | <0.01      |
| M49.1 Brucella spondylitis              | <5            | <0.01      |
| M63.0 Myositis in bacterial diseases .. | <5            | <0.01      |
| M72.6 Necrotizing fasciitis             | <5            | <0.01      |
| M86.3 Chronic multifocal osteomyelitis  | <5            | <0.01      |
| M86.4 Chronic osteomyelitis with drai.. | <5            | <0.01      |
| M86.8 Other osteomyelitis               | <5            | <0.01      |
| O23.2 Infections of urethra in pregna.. | <5            | <0.01      |
| O23.3 Infections of other parts of ur.. | <5            | <0.01      |
| O98.0 Tuberculosis complicating pregn.. | <5            | <0.01      |
| O98.1 Syphilis complicating pregnancy.. | <5            | <0.01      |
| P39.0 Neonatal infective mastitis       | <5            | <0.01      |
| P39.1 Neonatal conjunctivitis and dac.. | <5            | <0.01      |
| <b>Total</b>                            | <b>68 152</b> | <b>100</b> |

**eTable 13. Distribution of extracellular bacterial infections in primary analysis (Finnish multicohort sample)**

| ICD-10 code and description | N | % |
|-----------------------------|---|---|
|-----------------------------|---|---|

|                                         |      |       |
|-----------------------------------------|------|-------|
| J03.0 Streptococcal tonsillitis         | 1336 | 27.52 |
| A04.7 Enterocolitis due to Clostridiu.. | 666  | 13.72 |
| J13 Pneumonia due to Streptococcus pn.. | 411  | 8.47  |
| A41.0 Sepsis due to Staphylococcus au.. | 378  | 7.79  |
| A69.2 Lyme disease                      | 343  | 7.06  |
| A40.3 Sepsis due to Streptococcus pne.. | 200  | 4.12  |
| A40.8 Other streptococcal sepsis        | 124  | 2.55  |
| A54.9 Gonococcal infection, unspecified | 91   | 1.87  |
| A54.2 Gonococcal pelviperitonitis and.. | 88   | 1.81  |
| A40.0 Sepsis due to streptococcus, gr.. | 82   | 1.69  |
| A41.1 Sepsis due to other specified s.. | 79   | 1.63  |
| A40.9 Streptococcal sepsis, unspecified | 73   | 1.50  |
| J02.0 Streptococcal pharyngitis         | 62   | 1.28  |
| A49.0 Staphylococcal infection, unspe.. | 58   | 1.19  |
| A38 Scarlet fever                       | 56   | 1.15  |
| A39.0 Meningococcal meningitis          | 47   | 0.97  |
| M00.0 Staphylococcal arthritis and po.. | 42   | 0.87  |
| A37 Whooping cough                      | 41   | 0.84  |
| A40.1 Sepsis due to streptococcus, gr.. | 39   | 0.80  |
| A41.2 Sepsis due to unspecified staph.. | 38   | 0.78  |
| B96.2 Escherichia coli [E. coli] as t.. | 36   | 0.74  |
| G00.0 Haemophilus meningitis            | 33   | 0.68  |
| L01.0 Impetigo [any organism] [any si.. | 30   | 0.62  |
| G00.1 Pneumococcal meningitis           | 25   | 0.51  |
| A54.1 Gonococcal infection of lower g.. | 22   | 0.45  |
| J14 Pneumonia due to Haemophilus infl.. | 18   | 0.37  |
| A51.0 Primary genital syphilis          | 17   | 0.35  |
| A52.1 Symptomatic neurosyphilis         | 17   | 0.35  |
| B95.6 Staphylococcus aureus as the ca.. | 17   | 0.35  |
| A51.3 Secondary syphilis of skin and .. | 16   | 0.33  |
| A48.0 Gas gangrene                      | 14   | 0.29  |
| B95.8 Unspecified staphylococcus as t.. | 14   | 0.29  |
| A39.2 Acute meningococcaemia            | 13   | 0.27  |
| J15.0 Pneumonia due to Klebsiella pne.. | 13   | 0.27  |
| L01 Impetigo                            | 13   | 0.27  |
| M00.2 Other streptococcal arthritis a.. | 13   | 0.27  |
| J20.1 Acute bronchitis due to Haemoph.. | 12   | 0.25  |
| L01.1 Impetiginization of other derma.. | 12   | 0.25  |
| A04.3 Enterohaemorrhagic Escherichia .. | 11   | 0.23  |
| M01.2 Arthritis in Lyme disease         | 11   | 0.23  |
| A54.0 Gonococcal infection of lower g.. | 10   | 0.21  |
| B96.5 Pseudomonas (aeruginosa) as the.. | 10   | 0.21  |
| A39.4 Meningococcaemia, unspecified     | 9    | 0.19  |
| B95.5 Unspecified streptococcus as th.. | 9    | 0.19  |
| B95.4 Other streptococcus as the caus.. | 8    | 0.16  |
| J15.2 Pneumonia due to staphylococcus   | 8    | 0.16  |
| J15.4 Pneumonia due to other streptoc.. | 8    | 0.16  |
| A04.0 Enteropathogenic Escherichia co.. | 7    | 0.14  |

|                                         |    |       |
|-----------------------------------------|----|-------|
| J15.1 Pneumonia due to Pseudomonas      | 7  | 0.14  |
| A05.0 Foodborne staphylococcal intoxi.. | 6  | 0.12  |
| B95.3 Streptococcus pneumoniae as the.. | 6  | 0.12  |
| G00.3 Staphylococcal meningitis         | 6  | 0.12  |
| J15.3 Pneumonia due to streptococcus,.. | 6  | 0.12  |
| A04.4 Other intestinal Escherichia co.. | 5  | 0.10  |
| A37.9 Whooping cough, unspecified       | 5  | 0.10  |
| A51.5 Early syphilis, latent            | 5  | 0.10  |
| A51.9 Early syphilis, unspecified       | 5  | 0.10  |
| A53.9 Syphilis, unspecified             | 5  | 0.10  |
| B95.0 Streptococcus, group A, as the .. | 5  | 0.10  |
| G00.2 Streptococcal meningitis          | 5  | 0.10  |
| J15.5 Pneumonia due to Escherichia coli | 5  | 0.10  |
| A00.9 Cholera, unspecified              | <5 | <0.10 |
| A04.1 Enterotoxigenic Escherichia col.. | <5 | <0.10 |
| A05.1 Botulism                          | <5 | <0.10 |
| A05.2 Foodborne Clostridium perfringe.. | <5 | <0.10 |
| A22.0 Cutaneous anthrax                 | <5 | <0.10 |
| A22.2 Gastrointestinal anthrax          | <5 | <0.10 |
| A25.9 Rat-bite fever, unspecified       | <5 | <0.10 |
| A27 Leptospirosis                       | <5 | <0.10 |
| A27.0 Leptospirosis icterohaemorrhagica | <5 | <0.10 |
| A27.8 Other forms of leptospirosis      | <5 | <0.10 |
| A27.9 Leptospirosis, unspecified        | <5 | <0.10 |
| A28.0 Pasteurellosis                    | <5 | <0.10 |
| A35 Other tetanus                       | <5 | <0.10 |
| A36 Diphtheria                          | <5 | <0.10 |
| A37.0 Whooping cough due to Bordetell.. | <5 | <0.10 |
| A39 Meningococcal infection             | <5 | <0.10 |
| A39.1 Waterhouse-Friderichsen syndrome  | <5 | <0.10 |
| A39.5 Meningococcal heart disease       | <5 | <0.10 |
| A39.8 Other meningococcal infections    | <5 | <0.10 |
| A39.9 Meningococcal infection, unspec.. | <5 | <0.10 |
| A40 Streptococcal sepsis                | <5 | <0.10 |
| A40.2 Sepsis due to streptococcus, gr.. | <5 | <0.10 |
| A41.3 Sepsis due to Haemophilus influ.. | <5 | <0.10 |
| A48.3 Toxic shock syndrome              | <5 | <0.10 |
| A49.2 Haemophilus influenzae infectio.. | <5 | <0.10 |
| A50 Congenital syphilis                 | <5 | <0.10 |
| A50.5 Other late congenital syphilis,.. | <5 | <0.10 |
| A50.9 Congenital syphilis, unspecified  | <5 | <0.10 |
| A51.1 Primary anal syphilis             | <5 | <0.10 |
| A51.2 Primary syphilis of other sites   | <5 | <0.10 |
| A51.4 Other secondary syphilis          | <5 | <0.10 |
| A52.0 Cardiovascular syphilis           | <5 | <0.10 |
| A52.7 Other symptomatic late syphilis   | <5 | <0.10 |
| A52.8 Late syphilis, latent             | <5 | <0.10 |
| A53 Other and unspecified syphilis      | <5 | <0.10 |

|                                         |              |            |
|-----------------------------------------|--------------|------------|
| A54 Gonococcal infection                | <5           | <0.10      |
| A54.3 Gonococcal infection of eye       | <5           | <0.10      |
| A54.4 Gonococcal infection of musculo.. | <5           | <0.10      |
| A54.6 Gonococcal infection of anus an.. | <5           | <0.10      |
| A54.8 Other gonococcal infections       | <5           | <0.10      |
| A66.1 Multiple papillomata and wet cr.. | <5           | <0.10      |
| A66.3 Hyperkeratosis of yaws            | <5           | <0.10      |
| A67 Pinta [carate]                      | <5           | <0.10      |
| A67.1 Intermediate lesions of pinta     | <5           | <0.10      |
| A68 Relapsing fevers                    | <5           | <0.10      |
| A68.9 Relapsing fever, unspecified      | <5           | <0.10      |
| A69.9 Spirochaetal infection, unspeci.. | <5           | <0.10      |
| B95.1 Streptococcus, group B, as the .. | <5           | <0.10      |
| B95.7 Other staphylococcus as the cau.. | <5           | <0.10      |
| B96.1 Klebsiella pneumoniae [K. pneum.. | <5           | <0.10      |
| B96.3 Haemophilus influenzae [H. infl.. | <5           | <0.10      |
| B96.7 Clostridium perfringens [C. per.. | <5           | <0.10      |
| J20.2 Acute bronchitis due to strepto.. | <5           | <0.10      |
| L00 Staphylococcal scalded skin syndr.. | <5           | <0.10      |
| M00.1 Pneumococcal arthritis and poly.. | <5           | <0.10      |
| M01.0 Meningococcal arthritis           | <5           | <0.10      |
| M73.0 Gonococcal bursitis               | <5           | <0.10      |
| N74.3 Female gonococcal pelvic inflam.. | <5           | <0.10      |
| O98.1 Syphilis complicating pregnancy.. | <5           | <0.10      |
| <b>Total</b>                            | <b>4 855</b> | <b>100</b> |

**eTable 14. Distribution of intracellular bacterial infections in primary analysis (Finnish multicohort sample)**

| ICD-10 code and description             | N   | %     |
|-----------------------------------------|-----|-------|
| A04.5 Campylobacter enteritis           | 289 | 13.47 |
| A02.0 Salmonella enteritis              | 230 | 10.72 |
| A16.2 Tuberculosis of lung, without m.. | 152 | 7.08  |
| J15.7 Pneumonia due to Mycoplasma pne.. | 144 | 6.71  |
| A02 Other salmonella infections         | 130 | 6.06  |
| A56.1 Chlamydial infection of pelvipe.. | 128 | 5.96  |
| A15.0 Tuberculosis of lung, confirmed.. | 106 | 4.94  |
| J20.0 Acute bronchitis due to Mycopla.. | 79  | 3.68  |
| A74.9 Chlamydial infection, unspecified | 73  | 3.40  |
| A56.0 Chlamydial infection of lower g.. | 59  | 2.75  |
| A18.2 Tuberculous peripheral lymphade.. | 52  | 2.42  |
| A04.6 Enteritis due to Yersinia enter.. | 50  | 2.33  |
| A02.1 Salmonella sepsis                 | 41  | 1.91  |
| A16.5 Tuberculous pleurisy, without m.. | 35  | 1.63  |
| A21.9 Tularaemia, unspecified           | 32  | 1.49  |
| A21.0 Ulceroglandular tularaemia        | 29  | 1.35  |
| A15.1 Tuberculosis of lung, confirmed.. | 26  | 1.21  |
| A18.0 Tuberculosis of bones and joints  | 23  | 1.07  |

|                                         |    |       |
|-----------------------------------------|----|-------|
| A31.0 Pulmonary mycobacterial infection | 23 | 1.07  |
| N74.4 Female chlamydial pelvic inflam.. | 22 | 1.03  |
| A02.9 Salmonella infection, unspecified | 18 | 0.84  |
| A01.4 Paratyphoid fever, unspecified    | 16 | 0.75  |
| A03.3 Shigellosis due to Shigella son.. | 16 | 0.75  |
| J16.0 Chlamydial pneumonia              | 15 | 0.70  |
| A02.8 Other specified salmonella infe.. | 13 | 0.61  |
| A18.1 Tuberculosis of genitourinary s.. | 13 | 0.61  |
| A02.2 Localized salmonella infections   | 12 | 0.56  |
| A03.1 Shigellosis due to Shigella fle.. | 12 | 0.56  |
| A15.6 Tuberculous pleurisy, confirmed.. | 12 | 0.56  |
| A01.2 Paratyphoid fever B               | 11 | 0.51  |
| A16.0 Tuberculosis of lung, bacteriol.. | 11 | 0.51  |
| A32.7 Listerial sepsis                  | 11 | 0.51  |
| A74.8 Other chlamydial diseases         | 10 | 0.47  |
| A01.0 Typhoid fever                     | 9  | 0.42  |
| A16.9 Respiratory tuberculosis unspec.. | 9  | 0.42  |
| A03.9 Shigellosis, unspecified          | 8  | 0.37  |
| A15.2 Tuberculosis of lung, confirmed.. | 8  | 0.37  |
| A18.3 Tuberculosis of intestines, per.. | 8  | 0.37  |
| A32.8 Other forms of listeriosis        | 8  | 0.37  |
| A49.3 Mycoplasma infection, unspecifi.. | 8  | 0.37  |
| A18.8 Tuberculosis of other specified.. | 7  | 0.33  |
| A31.9 Mycobacterial infection, unspec.. | 7  | 0.33  |
| A56.2 Chlamydial infection of genitou.. | 7  | 0.33  |
| A21.2 Pulmonary tularaemia              | 6  | 0.28  |
| A31 Infection due to other mycobacteria | 6  | 0.28  |
| A15.4 Tuberculosis of intrathoracic l.. | 5  | 0.23  |
| A15.7 Primary respiratory tuberculosi.. | 5  | 0.23  |
| A15.9 Respiratory tuberculosis unspec.. | 5  | 0.23  |
| A16.1 Tuberculosis of lung, bacteriol.. | 5  | 0.23  |
| A18.4 Tuberculosis of skin and subcut.. | 5  | 0.23  |
| A26.0 Cutaneous erysipeloid             | 5  | 0.23  |
| A30 Leprosy [Hansen disease]            | 5  | 0.23  |
| A32.1 Listerial meningitis and mening.. | 5  | 0.23  |
| O98.0 Tuberculosis complicating pregn.. | 5  | 0.23  |
| A01.3 Paratyphoid fever C               | <5 | <0.23 |
| A15.8 Other respiratory tuberculosis,.. | <5 | <0.23 |
| A16.7 Primary respiratory tuberculosi.. | <5 | <0.23 |
| A21.7 Generalized tularaemia            | <5 | <0.23 |
| A78 Q fever                             | <5 | <0.23 |
| M49.0 Tuberculosis of spine             | <5 | <0.23 |
| A01.1 Paratyphoid fever A               | <5 | <0.23 |
| A03.0 Shigellosis due to Shigella dys.. | <5 | <0.23 |
| A15.3 Tuberculosis of lung, confirmed.. | <5 | <0.23 |
| A16.3 Tuberculosis of intrathoracic l.. | <5 | <0.23 |
| A17.0 Tuberculous meningitis            | <5 | <0.23 |
| A17.8 Other tuberculosis of nervous s.. | <5 | <0.23 |



|                                         |              |            |
|-----------------------------------------|--------------|------------|
| A21.8 Other forms of tularaemia         | <5           | <0.23      |
| A28.2 Extraintestinal yersiniosis       | <5           | <0.23      |
| A31.1 Cutaneous mycobacterial infection | <5           | <0.23      |
| A48.1 Legionnaires disease              | <5           | <0.23      |
| A75.0 Epidemic louse-borne typhus fev.. | <5           | <0.23      |
| A75.9 Typhus fever, unspecified         | <5           | <0.23      |
| B96.0 Mycoplasma pneumoniae [M. pneum.. | <5           | <0.23      |
| A03 Shigellosis                         | <5           | <0.23      |
| A03.2 Shigellosis due to Shigella boy.. | <5           | <0.23      |
| A15.5 Tuberculosis of larynx, trachea.. | <5           | <0.23      |
| A16.8 Other respiratory tuberculosis,.. | <5           | <0.23      |
| A19.2 Acute miliary tuberculosis, uns.. | <5           | <0.23      |
| A19.9 Miliary tuberculosis, unspecified | <5           | <0.23      |
| A23.9 Brucellosis, unspecified          | <5           | <0.23      |
| A24.0 Glanders                          | <5           | <0.23      |
| A31.8 Other mycobacterial infections    | <5           | <0.23      |
| A43.0 Pulmonary nocardiosis             | <5           | <0.23      |
| A44.9 Bartonellosis, unspecified        | <5           | <0.23      |
| A70 Chlamydia psittaci infection        | <5           | <0.23      |
| A77.1 Spotted fever due to Rickettsia.. | <5           | <0.23      |
| K67.3 Tuberculous peritonitis           | <5           | <0.23      |
| M49.1 Brucella spondylitis              | <5           | <0.23      |
| A03.8 Other shigellosis                 | <5           | <0.23      |
| A04.2 Enteroinvasive Escherichia coli.. | <5           | <0.23      |
| A16.4 Tuberculosis of larynx, trachea.. | <5           | <0.23      |
| A17.9 Tuberculosis of nervous system,.. | <5           | <0.23      |
| A18.5 Tuberculosis of eye               | <5           | <0.23      |
| A19.0 Acute miliary tuberculosis of a.. | <5           | <0.23      |
| A20.3 Plague meningitis                 | <5           | <0.23      |
| A20.9 Plague, unspecified               | <5           | <0.23      |
| A21.1 Oculoglandular tularaemia         | <5           | <0.23      |
| A24.1 Acute and fulminating melioidosis | <5           | <0.23      |
| A26.9 Erysipeloid, unspecified          | <5           | <0.23      |
| A32.9 Listeriosis, unspecified          | <5           | <0.23      |
| A44.1 Cutaneous and mucocutaneous bar.. | <5           | <0.23      |
| A44.8 Other forms of bartonellosis      | <5           | <0.23      |
| A55 Chlamydial lymphogranuloma (vener.. | <5           | <0.23      |
| A56.3 Chlamydial infection of anus an.. | <5           | <0.23      |
| A56.8 Sexually transmitted chlamydial.. | <5           | <0.23      |
| A58 Granuloma inguinale                 | <5           | <0.23      |
| A71 Trachoma                            | <5           | <0.23      |
| A77.8 Other spotted fevers              | <5           | <0.23      |
| A79 Other rickettsioses                 | <5           | <0.23      |
| A79.9 Rickettsiosis, unspecified        | <5           | <0.23      |
| K23.0 Tuberculous oesophagitis          | <5           | <0.23      |
| M01.1 Tuberculous arthritis             | <5           | <0.23      |
| <b>Total</b>                            | <b>2 146</b> | <b>100</b> |

**eTable 15. Distribution of Gram-positive bacterial infections in primary analysis (Finnish multicohort sample)**

| ICD-10 code and description             | N    | %     |
|-----------------------------------------|------|-------|
| J03.0 Streptococcal tonsillitis         | 1336 | 33.73 |
| A04.7 Enterocolitis due to Clostridiu.. | 670  | 16.91 |
| J13 Pneumonia due to Streptococcus pn.. | 412  | 10.40 |
| A41.0 Sepsis due to Staphylococcus au.. | 380  | 9.59  |
| A40.3 Sepsis due to Streptococcus pne.. | 200  | 5.05  |
| A40.8 Other streptococcal sepsis        | 123  | 3.11  |
| A40.0 Sepsis due to streptococcus, gr.. | 83   | 2.10  |
| A41.1 Sepsis due to other specified s.. | 79   | 1.99  |
| A40.9 Streptococcal sepsis, unspecified | 73   | 1.84  |
| J02.0 Streptococcal pharyngitis         | 63   | 1.59  |
| A49.0 Staphylococcal infection, unspe.. | 58   | 1.46  |
| A38 Scarlet fever                       | 56   | 1.41  |
| M00.0 Staphylococcal arthritis and po.. | 42   | 1.06  |
| A40.1 Sepsis due to streptococcus, gr.. | 39   | 0.98  |
| A41.2 Sepsis due to unspecified staph.. | 38   | 0.96  |
| L01.0 Impetigo [any organism] [any si.. | 30   | 0.76  |
| G00.1 Pneumococcal meningitis           | 26   | 0.66  |
| B95.6 Staphylococcus aureus as the ca.. | 18   | 0.45  |
| A49.1 Streptococcal infection, unspec.. | 17   | 0.43  |
| A48.0 Gas gangrene                      | 14   | 0.35  |
| B95.8 Unspecified staphylococcus as t.. | 14   | 0.35  |
| L01 Impetigo                            | 13   | 0.33  |
| M00.2 Other streptococcal arthritis a.. | 13   | 0.33  |
| L01.1 Impetiginization of other derma.. | 12   | 0.30  |
| A32.7 Listerial sepsis                  | 10   | 0.25  |
| B95.5 Unspecified streptococcus as th.. | 10   | 0.25  |
| A32.8 Other forms of listeriosis        | 9    | 0.23  |
| A42.9 Actinomycosis, unspecified        | 8    | 0.20  |
| B95.4 Other streptococcus as the caus.. | 8    | 0.20  |
| J15.2 Pneumonia due to staphylococcus   | 8    | 0.20  |
| J15.4 Pneumonia due to other streptoc.. | 8    | 0.20  |
| A05.0 Foodborne staphylococcal intoxi.. | 6    | 0.15  |
| B95.3 Streptococcus pneumoniae as the.. | 6    | 0.15  |
| G00.3 Staphylococcal meningitis         | 6    | 0.15  |
| J15.3 Pneumonia due to streptococcus,.. | 6    | 0.15  |
| A26.0 Cutaneous erysipeloid             | 5    | 0.13  |
| A32.1 Listerial meningitis and mening.. | 5    | 0.13  |
| B95.0 Streptococcus, group A, as the .. | 5    | 0.13  |
| B95.7 Other staphylococcus as the cau.. | 5    | 0.13  |
| G00.2 Streptococcal meningitis          | 5    | 0.13  |
| A05.1 Botulism                          | <5   | <0.13 |
| A05.2 Foodborne Clostridium perfringe.. | <5   | <0.13 |
| A22.0 Cutaneous anthrax                 | <5   | <0.13 |
| A22.2 Gastrointestinal anthrax          | <5   | <0.13 |

|                                         |              |            |
|-----------------------------------------|--------------|------------|
| A26.9 Erysipeloid, unspecified          | <5           | <0.13      |
| A32.9 Listeriosis, unspecified          | <5           | <0.13      |
| A35 Other tetanus                       | <5           | <0.13      |
| A36 Diphtheria                          | <5           | <0.13      |
| A40 Streptococcal sepsis                | <5           | <0.13      |
| A40.2 Sepsis due to streptococcus, gr.. | <5           | <0.13      |
| A42 Actinomycosis                       | <5           | <0.13      |
| A42.0 Pulmonary actinomycosis           | <5           | <0.13      |
| A42.1 Abdominal actinomycosis           | <5           | <0.13      |
| A42.2 Cervicofacial actinomycosis       | <5           | <0.13      |
| A42.7 Actinomycotic sepsis              | <5           | <0.13      |
| A42.8 Other forms of actinomycosis      | <5           | <0.13      |
| A43.0 Pulmonary nocardiosis             | <5           | <0.13      |
| A48.3 Toxic shock syndrome              | <5           | <0.13      |
| B95.1 Streptococcus, group B, as the .. | <5           | <0.13      |
| B96.7 Clostridium perfringens [C. per.. | <5           | <0.13      |
| J20.2 Acute bronchitis due to strepto.. | <5           | <0.13      |
| L00 Staphylococcal scalded skin syndr.. | <5           | <0.13      |
| M00.1 Pneumococcal arthritis and poly.. | <5           | <0.13      |
| <b>Total</b>                            | <b>3 961</b> | <b>100</b> |

**eTable 16. Distribution of Gram-negative bacterial infections in primary analysis (Finnish multicohort sample)**

| ICD-10 code and description             | N   | %     |
|-----------------------------------------|-----|-------|
| A41.5 Sepsis due to other Gram-negati.. | 907 | 28.54 |
| A69.2 Lyme disease                      | 345 | 10.86 |
| A04.5 Campylobacter enteritis           | 285 | 8.97  |
| A02.0 Salmonella enteritis              | 231 | 7.27  |
| A02 Other salmonella infections         | 130 | 4.09  |
| A56.1 Chlamydial infection of pelvipe.. | 122 | 3.84  |
| A54.9 Gonococcal infection, unspecified | 90  | 2.83  |
| A54.2 Gonococcal pelviperitonitis and.. | 85  | 2.67  |
| A74.9 Chlamydial infection, unspecified | 71  | 2.23  |
| A56.0 Chlamydial infection of lower g.. | 59  | 1.86  |
| A04.6 Enteritis due to Yersinia enter.. | 51  | 1.60  |
| A39.0 Meningococcal meningitis          | 47  | 1.48  |
| A37 Whooping cough                      | 42  | 1.32  |
| A02.1 Salmonella sepsis                 | 40  | 1.26  |
| B96.2 Escherichia coli [E. coli] as t.. | 35  | 1.10  |
| G00.0 Haemophilus meningitis            | 33  | 1.04  |
| A21.9 Tularaemia, unspecified           | 32  | 1.01  |
| A21.0 Ulceroglandular tularaemia        | 29  | 0.91  |
| A54.1 Gonococcal infection of lower g.. | 22  | 0.69  |
| N74.4 Female chlamydial pelvic inflam.. | 22  | 0.69  |
| A52.1 Symptomatic neurosyphilis         | 19  | 0.60  |
| J14 Pneumonia due to Haemophilus infl.. | 19  | 0.60  |
| A02.9 Salmonella infection, unspecified | 18  | 0.57  |

|                                         |    |       |
|-----------------------------------------|----|-------|
| A51.0 Primary genital syphilis          | 17 | 0.53  |
| A01.4 Paratyphoid fever, unspecified    | 16 | 0.50  |
| A03.3 Shigellosis due to Shigella son.. | 16 | 0.50  |
| A51.3 Secondary syphilis of skin and .. | 16 | 0.50  |
| J16.0 Chlamydial pneumonia              | 15 | 0.47  |
| A39.2 Acute meningococcaemia            | 13 | 0.41  |
| A02.2 Localized salmonella infections   | 12 | 0.38  |
| A02.8 Other specified salmonella infe.. | 12 | 0.38  |
| A03.1 Shigellosis due to Shigella fle.. | 12 | 0.38  |
| A04.3 Enterohaemorrhagic Escherichia .. | 12 | 0.38  |
| J15.0 Pneumonia due to Klebsiella pne.. | 12 | 0.38  |
| J20.1 Acute bronchitis due to Haemoph.. | 11 | 0.35  |
| M01.2 Arthritis in Lyme disease         | 11 | 0.35  |
| A01.2 Paratyphoid fever B               | 10 | 0.31  |
| A54.0 Gonococcal infection of lower g.. | 10 | 0.31  |
| A74.8 Other chlamydial diseases         | 10 | 0.31  |
| A01.0 Typhoid fever                     | 9  | 0.28  |
| A39.4 Meningococcaemia, unspecified     | 9  | 0.28  |
| J15.1 Pneumonia due to Pseudomonas      | 9  | 0.28  |
| A03.9 Shigellosis, unspecified          | 8  | 0.25  |
| B96.5 Pseudomonas (aeruginosa) as the.. | 8  | 0.25  |
| A56.2 Chlamydial infection of genitou.. | 7  | 0.22  |
| A04.0 Enteropathogenic Escherichia co.. | 6  | 0.19  |
| A21.2 Pulmonary tularaemia              | 6  | 0.19  |
| J15.5 Pneumonia due to Escherichia coli | 6  | 0.19  |
| J15.6 Pneumonia due to other aerobic .. | 6  | 0.19  |
| A04.4 Other intestinal Escherichia co.. | 5  | 0.16  |
| A37.9 Whooping cough, unspecified       | 5  | 0.16  |
| A51.5 Early syphilis, latent            | 5  | 0.16  |
| A53.9 Syphilis, unspecified             | 5  | 0.16  |
| A01.3 Paratyphoid fever C               | <5 | <0.16 |
| A21.7 Generalized tularaemia            | <5 | <0.16 |
| A41.3 Sepsis due to Haemophilus influ.. | <5 | <0.16 |
| A51.9 Early syphilis, unspecified       | <5 | <0.16 |
| A69.9 Spirochaetal infection, unspeci.. | <5 | <0.16 |
| A78 Q fever                             | <5 | <0.16 |
| A00.9 Cholera, unspecified              | <5 | <0.16 |
| A01.1 Paratyphoid fever A               | <5 | <0.16 |
| A03.0 Shigellosis due to Shigella dys.. | <5 | <0.16 |
| A21.8 Other forms of tularaemia         | <5 | <0.16 |
| A28.2 Extraintestinal yersiniosis       | <5 | <0.16 |
| A37.0 Whooping cough due to Bordetell.. | <5 | <0.16 |
| A39.8 Other meningococcal infections    | <5 | <0.16 |
| A48.1 Legionnaires disease              | <5 | <0.16 |
| A51.4 Other secondary syphilis          | <5 | <0.16 |
| A53 Other and unspecified syphilis      | <5 | <0.16 |
| A54.4 Gonococcal infection of musculo.. | <5 | <0.16 |
| A54.8 Other gonococcal infections       | <5 | <0.16 |

|                                         |    |       |
|-----------------------------------------|----|-------|
| A68 Relapsing fevers                    | <5 | <0.16 |
| A75.0 Epidemic louse-borne typhus fev.. | <5 | <0.16 |
| A75.9 Typhus fever, unspecified         | <5 | <0.16 |
| B96.1 Klebsiella pneumoniae [K. pneum.. | <5 | <0.16 |
| A03 Shigellosis                         | <5 | <0.16 |
| A03.2 Shigellosis due to Shigella boy.. | <5 | <0.16 |
| A24.0 Glanders                          | <5 | <0.16 |
| A27 Leptospirosis                       | <5 | <0.16 |
| A44.9 Bartonellosis, unspecified        | <5 | <0.16 |
| A50.5 Other late congenital syphilis,.. | <5 | <0.16 |
| A50.9 Congenital syphilis, unspecified  | <5 | <0.16 |
| A51.2 Primary syphilis of other sites   | <5 | <0.16 |
| A67 Pinta [carate]                      | <5 | <0.16 |
| A67.1 Intermediate lesions of pinta     | <5 | <0.16 |
| A68.9 Relapsing fever, unspecified      | <5 | <0.16 |
| A77.1 Spotted fever due to Rickettsia.. | <5 | <0.16 |
| B96.3 Haemophilus influenzae [H. infl.. | <5 | <0.16 |
| M49.1 Brucella spondylitis              | <5 | <0.16 |
| N74.3 Female gonococcal pelvic inflam.. | <5 | <0.16 |
| A03.8 Other shigellosis                 | <5 | <0.16 |
| A04.1 Enterotoxigenic Escherichia col.. | <5 | <0.16 |
| A04.2 Enteroinvasive Escherichia coli.. | <5 | <0.16 |
| A20.3 Plague meningitis                 | <5 | <0.16 |
| A20.9 Plague, unspecified               | <5 | <0.16 |
| A21.1 Oculoglandular tularaemia         | <5 | <0.16 |
| A23.9 Brucellosis, unspecified          | <5 | <0.16 |
| A24.1 Acute and fulminating melioidosis | <5 | <0.16 |
| A25.9 Rat-bite fever, unspecified       | <5 | <0.16 |
| A27.0 Leptospirosis icterohaemorrhagica | <5 | <0.16 |
| A27.8 Other forms of leptospirosis      | <5 | <0.16 |
| A27.9 Leptospirosis, unspecified        | <5 | <0.16 |
| A28.0 Pasteurellosis                    | <5 | <0.16 |
| A39 Meningococcal infection             | <5 | <0.16 |
| A39.1 Waterhouse-Friderichsen syndrome  | <5 | <0.16 |
| A39.5 Meningococcal heart disease       | <5 | <0.16 |
| A39.9 Meningococcal infection, unspec.. | <5 | <0.16 |
| A44.1 Cutaneous and mucocutaneous bar.. | <5 | <0.16 |
| A44.8 Other forms of bartonellosis      | <5 | <0.16 |
| A49.2 Haemophilus influenzae infectio.. | <5 | <0.16 |
| A50 Congenital syphilis                 | <5 | <0.16 |
| A51.1 Primary anal syphilis             | <5 | <0.16 |
| A52.0 Cardiovascular syphilis           | <5 | <0.16 |
| A52.7 Other symptomatic late syphilis   | <5 | <0.16 |
| A52.8 Late syphilis, latent             | <5 | <0.16 |
| A54 Gonococcal infection                | <5 | <0.16 |
| A54.3 Gonococcal infection of eye       | <5 | <0.16 |
| A54.6 Gonococcal infection of anus an.. | <5 | <0.16 |
| A55 Chlamydial lymphogranuloma (vener.. | <5 | <0.16 |

|                                         |              |            |
|-----------------------------------------|--------------|------------|
| A56.3 Chlamydial infection of anus an.. | <5           | <0.16      |
| A56.8 Sexually transmitted chlamydial.. | <5           | <0.16      |
| A58 Granuloma inguinale                 | <5           | <0.16      |
| A66.1 Multiple papillomata and wet cr.. | <5           | <0.16      |
| A66.3 Hyperkeratosis of yaws            | <5           | <0.16      |
| A70 Chlamydia psittaci infection        | <5           | <0.16      |
| A71 Trachoma                            | <5           | <0.16      |
| A77.8 Other spotted fevers              | <5           | <0.16      |
| A79 Other rickettsioses                 | <5           | <0.16      |
| A79.9 Rickettsiosis, unspecified        | <5           | <0.16      |
| M01.0 Meningococcal arthritis           | <5           | <0.16      |
| M49.2 Enterobacterial spondylitis       | <5           | <0.16      |
| M73.0 Gonococcal bursitis               | <5           | <0.16      |
| O98.1 Syphilis complicating pregnancy.. | <5           | <0.16      |
| <b>Total</b>                            | <b>3 178</b> | <b>100</b> |

**eTable 17. Distribution of viral infections in primary analysis (Finnish multicohort sample)**

| ICD-10 code and description             | N    | %    |
|-----------------------------------------|------|------|
| A08.4 Viral intestinal infection, uns.. | 1131 | 9.98 |
| A63.0 Anogenital (venereal) warts       | 1050 | 9.26 |
| B34.9 Viral infection, unspecified      | 775  | 6.84 |
| A98.5 Haemorrhagic fever with renal s.. | 757  | 6.68 |
| B27.0 Gammaherpesviral mononucleosis    | 529  | 4.67 |
| B27.9 Infectious mononucleosis, unspe.. | 413  | 3.64 |
| J11.1 Influenza with other respirator.. | 389  | 3.43 |
| B01.9 Varicella without complication    | 338  | 2.98 |
| B06.9 Rubella without complication      | 335  | 2.96 |
| J10.1 Influenza with other respirator.. | 316  | 2.79 |
| J11.8 Influenza with other manifestat.. | 312  | 2.75 |
| B18.2 Chronic viral hepatitis C         | 294  | 2.59 |
| A60.0 Herpesviral infection of genita.. | 277  | 2.44 |
| A87.9 Viral meningitis, unspecified     | 257  | 2.27 |
| B02.9 Zoster without complication       | 184  | 1.62 |
| B19.9 Unspecified viral hepatitis wit.. | 178  | 1.57 |
| J12 Viral pneumonia, not elsewhere cl.. | 177  | 1.56 |
| B07 Viral warts                         | 165  | 1.46 |
| A89 Unspecified viral infection of ce.. | 163  | 1.44 |
| J09 Influenza due to certain identifi.. | 154  | 1.36 |
| A86 Unspecified viral encephalitis      | 145  | 1.28 |
| A87.0 Enteroviral meningitis            | 145  | 1.28 |
| J10.0 Influenza with pneumonia, other.. | 132  | 1.16 |
| B97.8 Other viral agents as the cause.. | 121  | 1.07 |
| B00.1 Herpesviral vesicular dermatitis  | 112  | 0.99 |
| A95 Yellow fever                        | 109  | 0.96 |
| B05.9 Measles without complication      | 99   | 0.87 |
| A08.3 Other viral enteritis             | 96   | 0.85 |
| B34.8 Other viral infections of unspe.. | 86   | 0.76 |

|                                         |    |      |
|-----------------------------------------|----|------|
| B08.2 Exanthema subitum [sixth disease] | 85 | 0.75 |
| B00.2 Herpesviral gingivostomatitis a.. | 83 | 0.73 |
| B26.2 Mumps encephalitis                | 70 | 0.62 |
| B09 Unspecified viral infection chara.. | 68 | 0.60 |
| B00.0 Eczema herpeticum                 | 62 | 0.55 |
| J11.0 Influenza with pneumonia, virus.. | 62 | 0.55 |
| B02.8 Zoster with other complications   | 59 | 0.52 |
| O98.5 Other viral diseases complicati.. | 58 | 0.51 |
| B97.7 Papillomavirus as the cause of .. | 56 | 0.49 |
| A08.0 Rotaviral enteritis               | 53 | 0.47 |
| J12.9 Viral pneumonia, unspecified      | 52 | 0.46 |
| B15.9 Hepatitis A without hepatic coma  | 45 | 0.40 |
| B33.8 Other specified viral diseases    | 45 | 0.40 |
| B08.1 Molluscum contagiosum             | 44 | 0.39 |
| B25.8 Other cytomegaloviral diseases    | 42 | 0.37 |
| J21.9 Acute bronchiolitis, unspecified  | 42 | 0.37 |
| B01.8 Varicella with other complicati.. | 41 | 0.36 |
| B16.9 Acute hepatitis B without delta.. | 41 | 0.36 |
| J10.8 Influenza with other manifestat.. | 41 | 0.36 |
| B01.1 Varicella encephalitis            | 40 | 0.35 |
| G05.1 Encephalitis, myelitis and ence.. | 38 | 0.34 |
| B00.5 Herpesviral ocular disease        | 37 | 0.33 |
| B18.1 Chronic viral hepatitis B witho.. | 36 | 0.32 |
| B25.9 Cytomegaloviral disease, unspec.. | 35 | 0.31 |
| B02.3 Zoster ocular disease             | 34 | 0.30 |
| B23.1 HIV disease resulting in (persi.. | 29 | 0.26 |
| G02.0 Meningitis in viral diseases cl.. | 28 | 0.25 |
| B34.0 Adenovirus infection, unspecifi.. | 26 | 0.23 |
| B17.1 Acute hepatitis C                 | 25 | 0.22 |
| B26.9 Mumps without complication        | 24 | 0.21 |
| B01 Varicella [chickenpox]              | 23 | 0.20 |
| B24 Unspecified human immunodeficienc.. | 23 | 0.20 |
| O98.4 Viral hepatitis complicating pr.. | 23 | 0.20 |
| B00.8 Other forms of herpesviral infe.. | 22 | 0.19 |
| A80 Acute poliomyelitis                 | 21 | 0.19 |
| A88.8 Other specified viral infection.. | 21 | 0.19 |
| B27.1 Cytomegaloviral mononucleosis     | 20 | 0.18 |
| B97.0 Adenovirus as the cause of dise.. | 19 | 0.17 |
| J20.5 Acute bronchitis due to respira.. | 17 | 0.15 |
| B30 Viral conjunctivitis                | 16 | 0.14 |
| B00.9 Herpesviral infection, unspecif.. | 15 | 0.13 |
| A87.8 Other viral meningitis            | 14 | 0.12 |
| B06 Rubella [German measles]            | 14 | 0.12 |
| B25.1 Cytomegaloviral hepatitis         | 14 | 0.12 |
| B33.2 Viral carditis                    | 14 | 0.12 |
| B34.1 Enterovirus infection, unspecif.. | 13 | 0.11 |
| A08.1 Acute gastroenteropathy due to .. | 12 | 0.11 |
| A90 Dengue fever [classical dengue]     | 12 | 0.11 |

|                                         |    |       |
|-----------------------------------------|----|-------|
| B00.4 Herpesviral encephalitis          | 12 | 0.11  |
| B00.7 Disseminated herpesviral disease  | 12 | 0.11  |
| B26.0 Mumps orchitis                    | 12 | 0.11  |
| B02.0 Zoster encephalitis               | 11 | 0.10  |
| J21.0 Acute bronchiolitis due to resp.. | 11 | 0.10  |
| A08.2 Adenoviral enteritis              | 10 | 0.09  |
| B08.8 Other specified viral infection.. | 10 | 0.09  |
| A84.8 Other tick-borne viral encephal.. | 9  | 0.08  |
| B05.8 Measles with other complications  | 9  | 0.08  |
| Z21 Asymptomatic human immunodeficien.. | 9  | 0.08  |
| A60.9 Anogenital herpesviral infectio.. | 8  | 0.07  |
| B01.2 Varicella pneumonia               | 8  | 0.07  |
| B26.3 Mumps pancreatitis                | 8  | 0.07  |
| H62.1 Otitis externa in viral disease.. | 8  | 0.07  |
| J12.1 Respiratory syncytial virus pne.. | 8  | 0.07  |
| J12.8 Other viral pneumonia             | 8  | 0.07  |
| J17.1 Pneumonia in viral diseases cla.. | 8  | 0.07  |
| B02.1 Zoster meningitis                 | 7  | 0.06  |
| B02.2 Zoster with other nervous syste.. | 7  | 0.06  |
| B18.9 Chronic viral hepatitis, unspec.. | 7  | 0.06  |
| B19.0 Unspecified viral hepatitis wit.. | 7  | 0.06  |
| H19.1 Herpesviral keratitis and kerat.. | 7  | 0.06  |
| J20.4 Acute bronchitis due to parainf.. | 7  | 0.06  |
| A84.9 Tick-borne viral encephalitis, .. | 6  | 0.05  |
| A92.8 Other specified mosquito-borne .. | 6  | 0.05  |
| B02.7 Disseminated zoster               | 6  | 0.05  |
| B08.3 Erythema infectiosum [fifth dis.. | 6  | 0.05  |
| B08.5 Enteroviral vesicular pharyngitis | 6  | 0.05  |
| B15.0 Hepatitis A with hepatic coma     | 6  | 0.05  |
| B97.1 Enterovirus as the cause of dis.. | 6  | 0.05  |
| I41.1 Myocarditis in viral diseases c.. | 6  | 0.05  |
| A87.2 Lymphocytic choriomeningitis      | 5  | 0.04  |
| B17.8 Other specified acute viral hep.. | 5  | 0.04  |
| B26.8 Mumps with other complications    | 5  | 0.04  |
| B97.4 Respiratory syncytial virus as .. | 5  | 0.04  |
| A60.1 Herpesviral infection of perian.. | <5 | <0.04 |
| A80.1 Acute paralytic poliomyelitis, .. | <5 | <0.04 |
| A80.3 Acute paralytic poliomyelitis, .. | <5 | <0.04 |
| A81.2 Progressive multifocal leukoenc.. | <5 | <0.04 |
| A83.0 Japanese encephalitis             | <5 | <0.04 |
| A83.2 Eastern equine encephalitis       | <5 | <0.04 |
| A83.6 Rocio virus disease               | <5 | <0.04 |
| A83.8 Other mosquito-borne viral ence.. | <5 | <0.04 |
| A84 Tick-borne viral encephalitis       | <5 | <0.04 |
| A84.1 Central European tick-borne enc.. | <5 | <0.04 |
| A85.0 Enteroviral encephalitis          | <5 | <0.04 |
| A85.1 Adenoviral encephalitis           | <5 | <0.04 |
| A85.2 Arthropod-borne viral encephali.. | <5 | <0.04 |



|                                         |               |            |
|-----------------------------------------|---------------|------------|
| A85.8 Other specified viral encephali.. | <5            | <0.04      |
| A87.1 Adenoviral meningitis             | <5            | <0.04      |
| A88.1 Epidemic vertigo                  | <5            | <0.04      |
| A96.0 Junin haemorrhagic fever          | <5            | <0.04      |
| A98.0 Crimean-Congo haemorrhagic fever  | <5            | <0.04      |
| A98.1 Omsk haemorrhagic fever           | <5            | <0.04      |
| A98.3 Marburg virus disease             | <5            | <0.04      |
| A98.4 Ebola virus disease               | <5            | <0.04      |
| A99 Unspecified viral haemorrhagic fe.. | <5            | <0.04      |
| B00.3 Herpesviral meningitis            | <5            | <0.04      |
| B01.0 Varicella meningitis              | <5            | <0.04      |
| B02 Zoster [herpes zoster]              | <5            | <0.04      |
| B05 Measles                             | <5            | <0.04      |
| B05.3 Measles complicated by otitis m.. | <5            | <0.04      |
| B06.8 Rubella with other complications  | <5            | <0.04      |
| B08.0 Other orthopoxvirus infections    | <5            | <0.04      |
| B08.4 Enteroviral vesicular stomatiti.. | <5            | <0.04      |
| B16.0 Acute hepatitis B with delta-ag.. | <5            | <0.04      |
| B16.1 Acute hepatitis B with delta-ag.. | <5            | <0.04      |
| B17.0 Acute delta-(super)infection of.. | <5            | <0.04      |
| B17.2 Acute hepatitis E                 | <5            | <0.04      |
| B18.0 Chronic viral hepatitis B with .. | <5            | <0.04      |
| B18.8 Other chronic viral hepatitis     | <5            | <0.04      |
| B20.0 HIV disease resulting in mycoba.. | <5            | <0.04      |
| B20.6 HIV disease resulting in Pneumo.. | <5            | <0.04      |
| B21.2 HIV disease resulting in other .. | <5            | <0.04      |
| B21.9 HIV disease resulting in unspec.. | <5            | <0.04      |
| B23.8 HIV disease resulting in other .. | <5            | <0.04      |
| B25.0 Cytomegaloviral pneumonitis       | <5            | <0.04      |
| B26 Mumps                               | <5            | <0.04      |
| B26.1 Mumps meningitis                  | <5            | <0.04      |
| B30.0 Keratoconjunctivitis due to ade.. | <5            | <0.04      |
| B30.8 Other viral conjunctivitis        | <5            | <0.04      |
| B33.0 Epidemic myalgia                  | <5            | <0.04      |
| B34.2 Coronavirus infection, unspecif.. | <5            | <0.04      |
| B34.3 Parvovirus infection, unspecifi.. | <5            | <0.04      |
| B97.2 Coronavirus as the cause of dis.. | <5            | <0.04      |
| G04.1 Tropical spastic paraplegia       | <5            | <0.04      |
| J10 Influenza due to other identified.. | <5            | <0.04      |
| J11 Influenza, virus not identified     | <5            | <0.04      |
| J12.0 Adenoviral pneumonia              | <5            | <0.04      |
| J12.2 Parainfluenza virus pneumonia     | <5            | <0.04      |
| J20.6 Acute bronchitis due to rhinovi.. | <5            | <0.04      |
| J21.8 Acute bronchiolitis due to othe.. | <5            | <0.04      |
| <b>Total</b>                            | <b>11 335</b> | <b>100</b> |

**eTable 18. Distribution of herpesvirus infections in primary analysis (Finnish multicohort sample)**

| ICD-10 code and description             | N            | %          |
|-----------------------------------------|--------------|------------|
| B27.0 Gammaherpesviral mononucleosis    | 550          | 19.88      |
| B27.9 Infectious mononucleosis, unспе.. | 433          | 15.65      |
| B01.9 Varicella without complication    | 353          | 12.76      |
| A60.0 Herpesviral infection of genita.. | 295          | 10.66      |
| B02.9 Zoster without complication       | 199          | 7.19       |
| B00.1 Herpesviral vesicular dermatitis  | 123          | 4.45       |
| B00.2 Herpesviral gingivostomatitis a.. | 91           | 3.29       |
| B08.2 Exanthema subitum [sixth disease] | 86           | 3.11       |
| B02.8 Zoster with other complications   | 63           | 2.28       |
| B00.0 Eczema herpeticum                 | 62           | 2.24       |
| B25.8 Other cytomegaloviral diseases    | 50           | 1.81       |
| B01.1 Varicella encephalitis            | 48           | 1.73       |
| B01.8 Varicella with other complicati.. | 41           | 1.48       |
| B00.4 Herpesviral encephalitis          | 40           | 1.45       |
| B00.5 Herpesviral ocular disease        | 40           | 1.45       |
| B25.9 Cytomegaloviral disease, unспе..  | 40           | 1.45       |
| B02.3 Zoster ocular disease             | 35           | 1.26       |
| B00.8 Other forms of herpesviral infe.. | 24           | 0.87       |
| B01 Varicella [chickenpox]              | 24           | 0.87       |
| B27.1 Cytomegaloviral mononucleosis     | 21           | 0.76       |
| B00.3 Herpesviral meningitis            | 20           | 0.72       |
| B00.9 Herpesviral infection, unспеф..   | 15           | 0.54       |
| B01.2 Varicella pneumonia               | 14           | 0.51       |
| B25.1 Cytomegaloviral hepatitis         | 14           | 0.51       |
| B00.7 Disseminated herpesviral disease  | 13           | 0.47       |
| B02.0 Zoster encephalitis               | 11           | 0.4        |
| B02.1 Zoster meningitis                 | 10           | 0.36       |
| A60.9 Anogenital herpesviral infectio.. | 9            | 0.33       |
| B02.2 Zoster with other nervous syste.. | 8            | 0.29       |
| B25.0 Cytomegaloviral pneumonitis       | 8            | 0.29       |
| B01.0 Varicella meningitis              | 7            | 0.25       |
| H19.1 Herpesviral keratitis and kerat.. | 7            | 0.25       |
| B02.7 Disseminated zoster               | 6            | 0.22       |
| A60.1 Herpesviral infection of perian.. | <5           | <0.18      |
| B02 Zoster [herpes zoster]              | <5           | <0.18      |
| B21.0 HIV disease resulting in Kaposi.. | <5           | <0.18      |
| <b>Total</b>                            | <b>2 767</b> | <b>100</b> |

**eTable 19. Distribution of other potentially persistent viral infections in primary analysis (Finnish multicohort sample)**

| ICD-10 code and description             | N     | %     |
|-----------------------------------------|-------|-------|
| A63.0 Anogenital (venereal) warts       | 1 085 | 65.24 |
| B18.2 Chronic viral hepatitis C         | 352   | 21.17 |
| B97.7 Papillomavirus as the cause of .. | 57    | 3.43  |

|                                         |              |            |
|-----------------------------------------|--------------|------------|
| B18.1 Chronic viral hepatitis B witho.. | 40           | 2.41       |
| B23.1 HIV disease resulting in (persi.. | 30           | 1.8        |
| B24 Unspecified human immunodeficienc.. | 26           | 1.56       |
| O98.4 Viral hepatitis complicating pr.. | 24           | 1.44       |
| Z21 Asymptomatic human immunodeficien.. | 10           | 0.6        |
| B18.9 Chronic viral hepatitis, unspec.. | 9            | 0.54       |
| A81.2 Progressive multifocal leukoenc.. | 5            | 0.3        |
| B23.8 HIV disease resulting in other .. | <5           | <0.3       |
| B18.0 Chronic viral hepatitis B with .. | <5           | <0.3       |
| B18.8 Other chronic viral hepatitis     | <5           | <0.3       |
| B20.0 HIV disease resulting in mycoba.. | <5           | <0.3       |
| B20.6 HIV disease resulting in Pneumo.. | <5           | <0.3       |
| B21.2 HIV disease resulting in other .. | <5           | <0.3       |
| B20.9 HIV disease resulting in unspec.. | <5           | <0.3       |
| B21.0 HIV disease resulting in Kaposi.. | <5           | <0.3       |
| B21.9 HIV disease resulting in unspec.. | <5           | <0.3       |
| B22.0 HIV disease resulting in enceph.. | <5           | <0.3       |
| B23.0 Acute HIV infection syndrome      | <5           | <0.3       |
| B34.4 Papovavirus infection, unspecif.. | <5           | <0.3       |
| G04.1 Tropical spastic paraplegia       | <5           | <0.3       |
| <b>Total</b>                            | <b>1 663</b> | <b>100</b> |

**eTable 20. Distribution of acute viral infections in primary analysis (Finnish multicohort sample)**

| ICD-10 code and description             | N     | %     |
|-----------------------------------------|-------|-------|
| A08.4 Viral intestinal infection, uns.. | 1 156 | 15.77 |
| B34.9 Viral infection, unspecified      | 785   | 10.71 |
| A98.5 Haemorrhagic fever with renal s.. | 769   | 10.49 |
| J11.1 Influenza with other respirator.. | 395   | 5.39  |
| B06.9 Rubella without complication      | 341   | 4.65  |
| J10.1 Influenza with other respirator.. | 325   | 4.43  |
| J11.8 Influenza with other manifestat.. | 315   | 4.3   |
| A87.9 Viral meningitis, unspecified     | 268   | 3.66  |
| B19.9 Unspecified viral hepatitis wit.. | 182   | 2.48  |
| J12 Viral pneumonia, not elsewhere cl.. | 180   | 2.46  |
| B07 Viral warts                         | 168   | 2.29  |
| A89 Unspecified viral infection of ce.. | 166   | 2.26  |
| J09 Influenza due to certain identifi.. | 157   | 2.14  |
| A86 Unspecified viral encephalitis      | 150   | 2.05  |
| A87.0 Enteroviral meningitis            | 147   | 2.01  |
| J10.0 Influenza with pneumonia, other.. | 137   | 1.87  |
| B97.8 Other viral agents as the cause.. | 126   | 1.72  |
| A95 Yellow fever                        | 111   | 1.51  |
| B05.9 Measles without complication      | 102   | 1.39  |
| A08.3 Other viral enteritis             | 99    | 1.35  |
| B34.8 Other viral infections of unspe.. | 87    | 1.19  |
| B26.2 Mumps encephalitis                | 70    | 0.96  |
| B09 Unspecified viral infection chara.. | 68    | 0.93  |

|                                         |    |       |
|-----------------------------------------|----|-------|
| O98.5 Other viral diseases complicati.. | 66 | 0.9   |
| J11.0 Influenza with pneumonia, virus.. | 65 | 0.89  |
| A08.0 Rotaviral enteritis               | 55 | 0.75  |
| J12.9 Viral pneumonia, unspecified      | 53 | 0.72  |
| B15.9 Hepatitis A without hepatic coma  | 46 | 0.63  |
| B33.8 Other specified viral diseases    | 45 | 0.61  |
| B08.1 Molluscum contagiosum             | 44 | 0.6   |
| J21.9 Acute bronchiolitis, unspecified  | 44 | 0.6   |
| J10.8 Influenza with other manifestat.. | 43 | 0.59  |
| B16.9 Acute hepatitis B without delta.. | 42 | 0.57  |
| B17.1 Acute hepatitis C                 | 32 | 0.44  |
| B34.0 Adenovirus infection, unspecifi.. | 27 | 0.37  |
| B26.9 Mumps without complication        | 24 | 0.33  |
| A88.8 Other specified viral infection.. | 22 | 0.3   |
| A80 Acute poliomyelitis                 | 21 | 0.29  |
| B97.0 Adenovirus as the cause of dise.. | 20 | 0.27  |
| J20.5 Acute bronchitis due to respira.. | 19 | 0.26  |
| A87.8 Other viral meningitis            | 16 | 0.22  |
| B30 Viral conjunctivitis                | 16 | 0.22  |
| B06 Rubella [German measles]            | 14 | 0.19  |
| B33.2 Viral carditis                    | 14 | 0.19  |
| B34.1 Enterovirus infection, unspecif.. | 13 | 0.18  |
| J21.0 Acute bronchiolitis due to resp.. | 13 | 0.18  |
| A08.1 Acute gastroenteropathy due to .. | 12 | 0.16  |
| A90 Dengue fever [classical dengue]     | 12 | 0.16  |
| B26.0 Mumps orchitis                    | 12 | 0.16  |
| A08.2 Adenoviral enteritis              | 10 | 0.14  |
| A84.8 Other tick-borne viral encephal.. | 10 | 0.14  |
| B08.8 Other specified viral infection.. | 10 | 0.14  |
| J17.1 Pneumonia in viral diseases cla.. | 10 | 0.14  |
| B05.8 Measles with other complications  | 9  | 0.12  |
| J12.1 Respiratory syncytial virus pne.. | 9  | 0.12  |
| B19.0 Unspecified viral hepatitis wit.. | 8  | 0.11  |
| B26.3 Mumps pancreatitis                | 8  | 0.11  |
| J12.8 Other viral pneumonia             | 8  | 0.11  |
| A92.8 Other specified mosquito-borne .. | 7  | 0.1   |
| B15.0 Hepatitis A with hepatic coma     | 7  | 0.1   |
| B17.8 Other specified acute viral hep.. | 7  | 0.1   |
| B97.1 Enterovirus as the cause of dis.. | 7  | 0.1   |
| J20.4 Acute bronchitis due to parainf.. | 7  | 0.1   |
| A84.9 Tick-borne viral encephalitis, .. | 6  | 0.08  |
| B08.3 Erythema infectiosum [fifth dis.. | 6  | 0.08  |
| B08.5 Enteroviral vesicular pharyngitis | 6  | 0.08  |
| B97.4 Respiratory syncytial virus as .. | 6  | 0.08  |
| I41.1 Myocarditis in viral diseases c.. | 6  | 0.08  |
| A87.2 Lymphocytic choriomeningitis      | 5  | 0.07  |
| B26.8 Mumps with other complications    | 5  | 0.07  |
| A80.1 Acute paralytic poliomyelitis, .. | <5 | <0.07 |

|                                                       |              |            |
|-------------------------------------------------------|--------------|------------|
| A80.3 Acute paralytic poliomyelitis, ..               | <5           | <0.07      |
| A83.0 Japanese encephalitis                           | <5           | <0.07      |
| A83.2 Eastern equine encephalitis                     | <5           | <0.07      |
| A83.6 Rocio virus disease                             | <5           | <0.07      |
| A83.8 Other mosquito-borne viral encephalitis         | <5           | <0.07      |
| A84 Tick-borne viral encephalitis                     | <5           | <0.07      |
| A84.1 Central European tick-borne encephalitis        | <5           | <0.07      |
| A85.0 Enteroviral encephalitis                        | <5           | <0.07      |
| A85.1 Adenoviral encephalitis                         | <5           | <0.07      |
| A85.2 Arthropod-borne viral encephalitis              | <5           | <0.07      |
| A85.8 Other specified viral encephalitis              | <5           | <0.07      |
| A87.1 Adenoviral meningitis                           | <5           | <0.07      |
| A88.1 Epidemic vertigo                                | <5           | <0.07      |
| A96.0 Junin haemorrhagic fever                        | <5           | <0.07      |
| A98.0 Crimean-Congo haemorrhagic fever                | <5           | <0.07      |
| A98.1 Omsk haemorrhagic fever                         | <5           | <0.07      |
| A98.3 Marburg virus disease                           | <5           | <0.07      |
| A98.4 Ebola virus disease                             | <5           | <0.07      |
| A99 Unspecified viral haemorrhagic fever              | <5           | <0.07      |
| B05 Measles                                           | <5           | <0.07      |
| B05.3 Measles complicated by otitis media             | <5           | <0.07      |
| B06.8 Rubella with other complications                | <5           | <0.07      |
| B08.0 Other orthopoxvirus infections                  | <5           | <0.07      |
| B08.4 Enteroviral vesicular stomatitis                | <5           | <0.07      |
| B16.0 Acute hepatitis B with delta-agent              | <5           | <0.07      |
| B16.1 Acute hepatitis B with delta-agent              | <5           | <0.07      |
| B17.0 Acute delta-(super)infection of hepatitis B     | <5           | <0.07      |
| B17.2 Acute hepatitis E                               | <5           | <0.07      |
| B26 Mumps                                             | <5           | <0.07      |
| B26.1 Mumps meningitis                                | <5           | <0.07      |
| B30.0 Keratoconjunctivitis due to adenovirus          | <5           | <0.07      |
| B30.8 Other viral conjunctivitis                      | <5           | <0.07      |
| B33.0 Epidemic myalgia                                | <5           | <0.07      |
| B34.2 Coronavirus infection, unspecified              | <5           | <0.07      |
| B34.3 Parvovirus infection, unspecified               | <5           | <0.07      |
| B97.2 Coronavirus as the cause of disease             | <5           | <0.07      |
| J10 Influenza due to other identified influenza virus | <5           | <0.07      |
| J11 Influenza, virus not identified                   | <5           | <0.07      |
| J12.0 Adenoviral pneumonia                            | <5           | <0.07      |
| J12.2 Parainfluenza virus pneumonia                   | <5           | <0.07      |
| J20.6 Acute bronchitis due to rhinovirus              | <5           | <0.07      |
| J21.8 Acute bronchiolitis due to other virus          | <5           | <0.07      |
| <b>Total</b>                                          | <b>7 329</b> | <b>100</b> |

**eTable 21. Distribution of central nervous system infections in primary analysis (Finnish multicohort sample)**

| ICD-10 code and description | N | % |
|-----------------------------|---|---|
|-----------------------------|---|---|

|                                         |     |       |
|-----------------------------------------|-----|-------|
| A87.9 Viral meningitis, unspecified     | 280 | 16.91 |
| A89 Unspecified viral infection of ce.. | 167 | 10.08 |
| A86 Unspecified viral encephalitis      | 152 | 9.18  |
| G00.9 Bacterial meningitis, unspecified | 147 | 8.88  |
| A87.0 Enteroviral meningitis            | 145 | 8.76  |
| G03.9 Meningitis, unspecified           | 102 | 6.16  |
| B26.2 Mumps encephalitis                | 71  | 4.29  |
| G00.8 Other bacterial meningitis        | 46  | 2.78  |
| B01.1 Varicella encephalitis            | 42  | 2.54  |
| G05.1 Encephalitis, myelitis and ence.. | 40  | 2.42  |
| G00.1 Pneumococcal meningitis           | 37  | 2.23  |
| G06.1 Intrapinal abscess and granuloma  | 35  | 2.11  |
| A39.0 Meningococcal meningitis          | 34  | 2.05  |
| G00.0 Haemophilus meningitis            | 33  | 1.99  |
| G06.0 Intracranial abscess and granul.. | 33  | 1.99  |
| G01 Meningitis in bacterial diseases .. | 29  | 1.75  |
| G02.0 Meningitis in viral diseases cl.. | 28  | 1.69  |
| A88.8 Other specified viral infection.. | 22  | 1.33  |
| A80 Acute poliomyelitis                 | 21  | 1.27  |
| A52.1 Symptomatic neurosyphilis         | 18  | 1.09  |
| A87.8 Other viral meningitis            | 16  | 0.97  |
| B00.4 Herpesviral encephalitis          | 12  | 0.72  |
| B02.0 Zoster encephalitis               | 11  | 0.66  |
| A84.8 Other tick-borne viral encephal.. | 10  | 0.6   |
| B19.0 Unspecified viral hepatitis wit.. | 9   | 0.54  |
| G03.8 Meningitis due to other specifi.. | 9   | 0.54  |
| B02.1 Zoster meningitis                 | 8   | 0.48  |
| B15.0 Hepatitis A with hepatic coma     | 8   | 0.48  |
| A84.9 Tick-borne viral encephalitis, .. | 6   | 0.36  |
| G03.0 Nonpyogenic meningitis            | 6   | 0.36  |
| G05.0 Encephalitis, myelitis and ence.. | 6   | 0.36  |
| A81.2 Progressive multifocal leukoenc.. | 5   | 0.3   |
| G00.2 Streptococcal meningitis          | 5   | 0.3   |
| G00.3 Staphylococcal meningitis         | 5   | 0.3   |
| A17.0 Tuberculous meningitis            | <5  | <0.3  |
| A20.3 Plague meningitis                 | <5  | <0.3  |
| A32.1 Listerial meningitis and mening.. | <5  | <0.3  |
| A80.1 Acute paralytic poliomyelitis, .. | <5  | <0.3  |
| A80.3 Acute paralytic poliomyelitis, .. | <5  | <0.3  |
| A83.0 Japanese encephalitis             | <5  | <0.3  |
| A83.2 Eastern equine encephalitis       | <5  | <0.3  |
| A83.6 Rocio virus disease               | <5  | <0.3  |
| A83.8 Other mosquito-borne viral ence.. | <5  | <0.3  |
| A84 Tick-borne viral encephalitis       | <5  | <0.3  |
| A84.1 Central European tick-borne enc.. | <5  | <0.3  |
| A85.0 Enteroviral encephalitis          | <5  | <0.3  |
| A85.1 Adenoviral encephalitis           | <5  | <0.3  |
| A85.2 Arthropod-borne viral encephali.. | <5  | <0.3  |

|                                         |              |            |
|-----------------------------------------|--------------|------------|
| A85.8 Other specified viral encephali.. | <5           | <0.3       |
| A87.1 Adenoviral meningitis             | <5           | <0.3       |
| A87.2 Lymphocytic choriomeningitis      | <5           | <0.3       |
| A88.1 Epidemic vertigo                  | <5           | <0.3       |
| B00.3 Herpesviral meningitis            | <5           | <0.3       |
| B01.0 Varicella meningitis              | <5           | <0.3       |
| B16.0 Acute hepatitis B with delta-ag.. | <5           | <0.3       |
| B22.0 HIV disease resulting in enceph.. | <5           | <0.3       |
| B26.1 Mumps meningitis                  | <5           | <0.3       |
| B50.0 Plasmodium falciparum malaria w.. | <5           | <0.3       |
| B69.0 Cysticercosis of central nervou.. | <5           | <0.3       |
| G03.1 Chronic meningitis                | <5           | <0.3       |
| G04.1 Tropical spastic paraplegia       | <5           | <0.3       |
| G04.2 Bacterial meningoenzephalitis a.. | <5           | <0.3       |
| G05.2 Encephalitis, myelitis and ence.. | <5           | <0.3       |
| G06 Intracranial and intraspinal absc.. | <5           | <0.3       |
| G06.2 Extradural and subdural abscess.. | <5           | <0.3       |
| G07 Intracranial and intraspinal absc.. | <5           | <0.3       |
| I68.1 Cerebral arteritis in infectiou.. | <5           | <0.3       |
| <b>Total</b>                            | <b>1 656</b> | <b>100</b> |

**eTable 22. Distribution of extra-central nervous system infections in primary analysis (Finnish multicohort sample)**

| ICD-10 code and description             | N      | %     |
|-----------------------------------------|--------|-------|
| K35 Acute appendicitis                  | 11 903 | 15.60 |
| J18.9 Pneumonia, unspecified            | 6088   | 7.98  |
| A09 Other gastroenteritis and colitis.. | 5639   | 7.39  |
| N10 Acute tubulo-interstitial nephritis | 3614   | 4.74  |
| J03.9 Acute tonsillitis, unspecified    | 3098   | 4.06  |
| A46 Erysipelas                          | 3097   | 4.06  |
| J36 Peritonsillar abscess               | 3041   | 3.99  |
| J15.9 Bacterial pneumonia, unspecified  | 2243   | 2.94  |
| N70.0 Acute salpingitis and oophoritis  | 1959   | 2.57  |
| O85 Puerperal sepsis                    | 1735   | 2.27  |
| J20.9 Acute bronchitis, unspecified     | 1153   | 1.51  |
| N39.0 Urinary tract infection, site n.. | 1060   | 1.39  |
| J01.0 Acute maxillary sinusitis         | 1047   | 1.37  |
| A49.9 Bacterial infection, unspecified  | 1030   | 1.35  |
| J03.0 Streptococcal tonsillitis         | 927    | 1.21  |
| A63.0 Anogenital (venereal) warts       | 847    | 1.11  |
| A08.4 Viral intestinal infection, uns.. | 819    | 1.07  |
| J22 Unspecified acute lower respirato.. | 778    | 1.02  |
| N71.0 Acute inflammatory disease of u.. | 726    | 0.95  |
| J02.9 Acute pharyngitis, unspecified    | 696    | 0.91  |
| J04.0 Acute laryngitis                  | 678    | 0.89  |
| B34.9 Viral infection, unspecified      | 620    | 0.81  |
| A98.5 Haemorrhagic fever with renal s.. | 580    | 0.76  |

|                                         |     |      |
|-----------------------------------------|-----|------|
| A08.5 Other specified intestinal infe.. | 490 | 0.64 |
| K57.2 Diverticular disease of large i.. | 457 | 0.60 |
| N30.0 Acute cystitis                    | 445 | 0.58 |
| J18.0 Bronchopneumonia, unspecified     | 441 | 0.58 |
| B27.0 Gammaherpesviral mononucleosis    | 417 | 0.55 |
| A41.5 Sepsis due to other Gram-negati.. | 413 | 0.54 |
| L05.9 Pilonidal cyst without abscess    | 392 | 0.51 |
| O08.0 Genital tract and pelvic infect.. | 375 | 0.49 |
| O03.5 Spontaneous abortion: Complete .. | 366 | 0.48 |
| B27.9 Infectious mononucleosis, unспе.. | 365 | 0.48 |
| K61.0 Anal abscess                      | 330 | 0.43 |
| K05.3 Chronic periodontitis             | 328 | 0.43 |
| A04.7 Enterocolitis due to Clostridiu.. | 310 | 0.41 |
| N75.1 Abscess of Bartholin gland        | 297 | 0.39 |
| H66.0 Acute suppurative otitis media    | 290 | 0.38 |
| J11.1 Influenza with other respirator.. | 287 | 0.38 |
| A41.9 Sepsis, unspecified               | 281 | 0.37 |
| B06.9 Rubella without complication      | 278 | 0.36 |
| J13 Pneumonia due to Streptococcus pn.. | 276 | 0.36 |
| K04.7 Periapical abscess without sinus  | 264 | 0.35 |
| B01.9 Varicella without complication    | 261 | 0.34 |
| J11.8 Influenza with other manifestat.. | 257 | 0.34 |
| N61 Inflammatory disorders of breast    | 255 | 0.33 |
| A69.2 Lyme disease                      | 246 | 0.32 |
| L04 Acute lymphadenitis                 | 227 | 0.30 |
| M00.9 Pyogenic arthritis, unspecified   | 214 | 0.28 |
| N45.9 Orchitis, epididymitis and epid.. | 210 | 0.28 |
| J10.1 Influenza with other respirator.. | 209 | 0.27 |
| B99 Other and unspecified infectious .. | 199 | 0.26 |
| L03.0 Cellulitis of finger and toe      | 197 | 0.26 |
| A04.5 Campylobacter enteritis           | 194 | 0.25 |
| K04.5 Chronic apical periodontitis      | 194 | 0.25 |
| A60.0 Herpesviral infection of genita.. | 181 | 0.24 |
| K65.0 Acute peritonitis                 | 180 | 0.24 |
| O23.0 Infections of kidney in pregnancy | 176 | 0.23 |
| K61 Abscess of anal and rectal regions  | 175 | 0.23 |
| O23.5 Infections of the genital tract.. | 175 | 0.23 |
| K12.2 Cellulitis and abscess of mouth   | 174 | 0.23 |
| B18.2 Chronic viral hepatitis C         | 173 | 0.23 |
| A41.0 Sepsis due to Staphylococcus au.. | 169 | 0.22 |
| J05.1 Acute epiglottitis                | 169 | 0.22 |
| O03.0 Spontaneous abortion: Incomplet.. | 169 | 0.22 |
| L02 Cutaneous abscess, furuncle and c.. | 166 | 0.22 |
| K02.1 Caries of dentine                 | 163 | 0.21 |
| O86.0 Infection of obstetric surgical.. | 163 | 0.21 |
| L08.9 Local infection of skin and sub.. | 158 | 0.21 |
| O23.9 Other and unspecified genitouri.. | 158 | 0.21 |
| A02.0 Salmonella enteritis              | 153 | 0.20 |



|                                         |     |      |
|-----------------------------------------|-----|------|
| J15.8 Other bacterial pneumonia         | 148 | 0.19 |
| L02.4 Cutaneous abscess, furuncle and.. | 146 | 0.19 |
| B19.9 Unspecified viral hepatitis wit.. | 143 | 0.19 |
| J12 Viral pneumonia, not elsewhere cl.. | 141 | 0.18 |
| A41.8 Other specified sepsis            | 140 | 0.18 |
| A16.2 Tuberculosis of lung, without m.. | 135 | 0.18 |
| B07 Viral warts                         | 135 | 0.18 |
| O86.1 Other infection of genital trac.. | 131 | 0.17 |
| B86 Scabies                             | 127 | 0.17 |
| L05.0 Pilonidal cyst with abscess       | 123 | 0.16 |
| O86.4 Pyrexia of unknown origin follo.. | 120 | 0.16 |
| A40.3 Sepsis due to Streptococcus pne.. | 116 | 0.15 |
| K05.2 Acute periodontitis               | 115 | 0.15 |
| J18.1 Lobar pneumonia, unspecified      | 112 | 0.15 |
| A02 Other salmonella infections         | 110 | 0.14 |
| K02 Dental caries                       | 105 | 0.14 |
| B02.9 Zoster without complication       | 102 | 0.13 |
| B97.8 Other viral agents as the cause.. | 102 | 0.13 |
| B35 Dermatophytosis                     | 101 | 0.13 |
| L04.0 Acute lymphadenitis of face, he.. | 100 | 0.13 |
| A56.1 Chlamydial infection of pelvipe.. | 99  | 0.13 |
| L03.1 Cellulitis of other parts of limb | 97  | 0.13 |
| J15.7 Pneumonia due to Mycoplasma pne.. | 92  | 0.12 |
| O23.4 Unspecified infection of urinar.. | 92  | 0.12 |
| L02.2 Cutaneous abscess, furuncle and.. | 91  | 0.12 |
| O04.0 Medical abortion: Incomplete, c.. | 90  | 0.12 |
| B05.9 Measles without complication      | 87  | 0.11 |
| A49.8 Other bacterial infections of u.. | 86  | 0.11 |
| O23.1 Infections of bladder in pregna.. | 84  | 0.11 |
| A04.9 Bacterial intestinal infection,.. | 81  | 0.11 |
| H00.1 Chalazion                         | 81  | 0.11 |
| J86.9 Pyothorax without fistula         | 80  | 0.10 |
| B00.1 Herpesviral vesicular dermatitis  | 79  | 0.10 |
| L02.3 Cutaneous abscess, furuncle and.. | 79  | 0.10 |
| A15.0 Tuberculosis of lung, confirmed.. | 78  | 0.10 |
| B08.2 Exanthema subitum [sixth disease] | 78  | 0.10 |
| H10.0 Mucopurulent conjunctivitis       | 78  | 0.10 |
| A95 Yellow fever                        | 76  | 0.10 |
| B34.8 Other viral infections of unspe.. | 76  | 0.10 |
| J16.8 Pneumonia due to other specifie.. | 76  | 0.10 |
| M71.1 Other infective bursitis          | 76  | 0.10 |
| O86.2 Urinary tract infection followi.. | 74  | 0.10 |
| A54.9 Gonococcal infection, unspecified | 73  | 0.10 |
| L03.9 Cellulitis, unspecified           | 73  | 0.10 |
| A08.3 Other viral enteritis             | 72  | 0.09 |
| I33.0 Acute and subacute infective en.. | 71  | 0.09 |
| N41.0 Acute prostatitis                 | 71  | 0.09 |
| H60.3 Other infective otitis externa    | 70  | 0.09 |

|                                         |    |      |
|-----------------------------------------|----|------|
| L08.8 Other specified local infection.. | 70 | 0.09 |
| M86.9 Osteomyelitis, unspecified        | 69 | 0.09 |
| N76.4 Abscess of vulva                  | 69 | 0.09 |
| O04.5 Medical abortion: Complete or u.. | 67 | 0.09 |
| J39.0 Retropharyngeal and parapharyng.. | 66 | 0.09 |
| K57.0 Diverticular disease of small i.. | 65 | 0.09 |
| M86.1 Other acute osteomyelitis         | 64 | 0.08 |
| B00.2 Herpesviral gingivostomatitis a.. | 63 | 0.08 |
| J09 Influenza due to certain identifi.. | 63 | 0.08 |
| K04.6 Periapical abscess with sinus     | 63 | 0.08 |
| B37 Candidiasis                         | 62 | 0.08 |
| O75.3 Other infection during labour     | 61 | 0.08 |
| J10.0 Influenza with pneumonia, other.. | 60 | 0.08 |
| O86.8 Other specified puerperal infec.. | 60 | 0.08 |
| O98.8 Other maternal infectious and p.. | 60 | 0.08 |
| A04.8 Other specified bacterial intes.. | 58 | 0.08 |
| N77.1 Vaginitis, vulvitis and vulvova.. | 57 | 0.07 |
| H62.0 Otitis externa in bacterial dis.. | 56 | 0.07 |
| A54.2 Gonococcal pelviperitonitis and.. | 55 | 0.07 |
| A74.9 Chlamydial infection, unspecified | 55 | 0.07 |
| B00.0 Eczema herpeticum                 | 54 | 0.07 |
| B09 Unspecified viral infection chara.. | 54 | 0.07 |
| L02.1 Cutaneous abscess, furuncle and.. | 54 | 0.07 |
| L02.9 Cutaneous abscess, furuncle and.. | 52 | 0.07 |
| O91.1 Abscess of breast associated wi.. | 50 | 0.07 |
| A38 Scarlet fever                       | 48 | 0.06 |
| N73.3 Female acute pelvic peritonitis   | 47 | 0.06 |
| H00.0 Hordeolum and other deep inflam.. | 46 | 0.06 |
| A40.8 Other streptococcal sepsis        | 45 | 0.06 |
| H05.0 Acute inflammation of orbit       | 44 | 0.06 |
| O98.5 Other viral diseases complicati.. | 44 | 0.06 |
| A56.0 Chlamydial infection of lower g.. | 42 | 0.06 |
| B08.1 Molluscum contagiosum             | 41 | 0.05 |
| J11.0 Influenza with pneumonia, virus.. | 41 | 0.05 |
| J20.0 Acute bronchitis due to Mycopla.. | 41 | 0.05 |
| A18.2 Tuberculous peripheral lymphade.. | 40 | 0.05 |
| A40.9 Streptococcal sepsis, unspecified | 39 | 0.05 |
| B15.9 Hepatitis A without hepatic coma  | 39 | 0.05 |
| I40.0 Infective myocarditis             | 39 | 0.05 |
| J02.0 Streptococcal pharyngitis         | 39 | 0.05 |
| A40.0 Sepsis due to streptococcus, gr.. | 38 | 0.05 |
| K61.1 Rectal abscess                    | 38 | 0.05 |
| L02.0 Cutaneous abscess, furuncle and.. | 38 | 0.05 |
| L03.2 Cellulitis of face                | 38 | 0.05 |
| A08.0 Rotaviral enteritis               | 37 | 0.05 |
| J18.8 Other pneumonia, organism unspe.. | 37 | 0.05 |
| O98.3 Other infections with a predomi.. | 37 | 0.05 |
| A41.1 Sepsis due to other specified s.. | 36 | 0.05 |

|                                         |    |      |
|-----------------------------------------|----|------|
| B02.8 Zoster with other complications   | 36 | 0.05 |
| J12.9 Viral pneumonia, unspecified      | 36 | 0.05 |
| L08.0 Pyoderma                          | 36 | 0.05 |
| A49.0 Staphylococcal infection, unspe.. | 35 | 0.05 |
| B00.5 Herpesviral ocular disease        | 35 | 0.05 |
| B85 Pediculosis and phthiriasis         | 35 | 0.05 |
| J04.2 Acute laryngotracheitis           | 35 | 0.05 |
| L02.8 Cutaneous abscess, furuncle and.. | 35 | 0.05 |
| B97.7 Papillomavirus as the cause of .. | 34 | 0.04 |
| K02.9 Dental caries, unspecified        | 34 | 0.04 |
| B33.8 Other specified viral diseases    | 33 | 0.04 |
| M71.0 Abscess of bursa                  | 33 | 0.04 |
| A04.6 Enteritis due to Yersinia enter.. | 32 | 0.04 |
| B01.8 Varicella with other complicati.. | 31 | 0.04 |
| H70.0 Acute mastoiditis                 | 31 | 0.04 |
| M86.6 Other chronic osteomyelitis       | 31 | 0.04 |
| A02.1 Salmonella sepsis                 | 30 | 0.04 |
| A16.5 Tuberculous pleurisy, without m.. | 30 | 0.04 |
| H60.1 Cellulitis of external ear        | 30 | 0.04 |
| A59.0 Urogenital trichomoniasis         | 29 | 0.04 |
| H60.0 Abscess of external ear           | 28 | 0.04 |
| J85.2 Abscess of lung without pneumonia | 28 | 0.04 |
| N73.0 Acute parametritis and pelvic c.. | 28 | 0.04 |
| A05.9 Bacterial foodborne intoxicatio.. | 26 | 0.03 |
| A37 Whooping cough                      | 26 | 0.03 |
| B16.9 Acute hepatitis B without delta.. | 26 | 0.03 |
| B18.1 Chronic viral hepatitis B witho.. | 26 | 0.03 |
| J10.8 Influenza with other manifestat.. | 26 | 0.03 |
| A41.2 Sepsis due to unspecified staph.. | 25 | 0.03 |
| J86.0 Pyothorax with fistula            | 24 | 0.03 |
| K63.0 Abscess of intestine              | 24 | 0.03 |
| K75.0 Abscess of liver                  | 24 | 0.03 |
| B02.3 Zoster ocular disease             | 23 | 0.03 |
| M00.0 Staphylococcal arthritis and po.. | 23 | 0.03 |
| O98.9 Unspecified maternal infectious.. | 23 | 0.03 |
| H44.0 Purulent endophthalmitis          | 22 | 0.03 |
| I30.1 Infective pericarditis            | 22 | 0.03 |
| J21.9 Acute bronchiolitis, unspecified  | 22 | 0.03 |
| O86.3 Other genitourinary tract infec.. | 22 | 0.03 |
| K11.3 Abscess of salivary gland         | 21 | 0.03 |
| M65.0 Abscess of tendon sheath          | 21 | 0.03 |
| A18.0 Tuberculosis of bones and joints  | 20 | 0.03 |
| A21.0 Ulceroglandular tularaemia        | 20 | 0.03 |
| A21.9 Tularaemia, unspecified           | 20 | 0.03 |
| A54.1 Gonococcal infection of lower g.. | 20 | 0.03 |
| B34.0 Adenovirus infection, unspecifi.. | 20 | 0.03 |
| K61.2 Anorectal abscess                 | 20 | 0.03 |
| L03.3 Cellulitis of trunk               | 20 | 0.03 |

|                                         |    |      |
|-----------------------------------------|----|------|
| B50.9 Plasmodium falciparum malaria, .. | 19 | 0.02 |
| N76.0 Acute vaginitis                   | 19 | 0.02 |
| B26.9 Mumps without complication        | 18 | 0.02 |
| J04.1 Acute tracheitis                  | 18 | 0.02 |
| J17.3 Pneumonia in parasitic diseases   | 18 | 0.02 |
| K04.4 Acute apical periodontitis of p.. | 18 | 0.02 |
| A48.8 Other specified bacterial disea.. | 17 | 0.02 |
| B01 Varicella [chickenpox]              | 17 | 0.02 |
| B25.8 Other cytomegaloviral diseases    | 17 | 0.02 |
| B25.9 Cytomegaloviral disease, unspec.. | 17 | 0.02 |
| I42.1 Obstructive hypertrophic cardio.. | 17 | 0.02 |
| N15.1 Renal and perinephric abscess     | 17 | 0.02 |
| N74.4 Female chlamydial pelvic inflam.. | 17 | 0.02 |
| A07 Other protozoal intestinal diseases | 16 | 0.02 |
| A41.4 Sepsis due to anaerobes           | 16 | 0.02 |
| B17.1 Acute hepatitis C                 | 16 | 0.02 |
| B23.1 HIV disease resulting in (persi.. | 16 | 0.02 |
| B37.3 Candidiasis of vulva and vagina   | 16 | 0.02 |
| B37.7 Candidal sepsis                   | 16 | 0.02 |
| J86 Pyothorax                           | 16 | 0.02 |
| O98.4 Viral hepatitis complicating pr.. | 16 | 0.02 |
| A15.1 Tuberculosis of lung, confirmed.. | 15 | 0.02 |
| A40.1 Sepsis due to streptococcus, gr.. | 15 | 0.02 |
| B27.1 Cytomegaloviral mononucleosis     | 15 | 0.02 |
| B58.9 Toxoplasmosis, unspecified        | 15 | 0.02 |
| L01.0 Impetigo [any organism] [any si.. | 15 | 0.02 |
| M46.3 Infection of intervertebral dis.. | 15 | 0.02 |
| N45.0 Orchitis, epididymitis and epid.. | 15 | 0.02 |
| A02.9 Salmonella infection, unspecified | 14 | 0.02 |
| A51.0 Primary genital syphilis          | 14 | 0.02 |
| A51.3 Secondary syphilis of skin and .. | 14 | 0.02 |
| B37.8 Candidiasis of other sites        | 14 | 0.02 |
| K57.4 Diverticular disease of both sm.. | 14 | 0.02 |
| O91.0 Infection of nipple associated .. | 14 | 0.02 |
| A03.3 Shigellosis due to Shigella son.. | 13 | 0.02 |
| B00.8 Other forms of herpesviral infe.. | 13 | 0.02 |
| B00.9 Herpesviral infection, unspecif.. | 13 | 0.02 |
| B35.1 Tinea unguium                     | 13 | 0.02 |
| B59 Pneumocystosis                      | 13 | 0.02 |
| B97.0 Adenovirus as the cause of dise.. | 13 | 0.02 |
| J03.8 Acute tonsillitis due to other .. | 13 | 0.02 |
| L03.8 Cellulitis of other sites         | 13 | 0.02 |
| N34.0 Urethral abscess                  | 13 | 0.02 |
| B24 Unspecified human immunodeficienc.. | 12 | 0.02 |
| B30 Viral conjunctivitis                | 12 | 0.02 |
| B37.0 Candidal stomatitis               | 12 | 0.02 |
| B70.0 Diphyllbothriasis                 | 12 | 0.02 |
| J85.1 Abscess of lung with pneumonia    | 12 | 0.02 |

|                                         |    |      |
|-----------------------------------------|----|------|
| L70.1 Acne conglobata                   | 12 | 0.02 |
| M60.0 Infective myositis                | 12 | 0.02 |
| O06.5 Unspecified abortion: Complete .. | 12 | 0.02 |
| A01.4 Paratyphoid fever, unspecified    | 11 | 0.01 |
| A39.2 Acute meningococcaemia            | 11 | 0.01 |
| A64 Unspecified sexually transmitted .. | 11 | 0.01 |
| B06 Rubella [German measles]            | 11 | 0.01 |
| B26.0 Mumps orchitis                    | 11 | 0.01 |
| B26.3 Mumps pancreatitis                | 11 | 0.01 |
| B34.1 Enterovirus infection, unspecif.. | 11 | 0.01 |
| L01 Impetigo                            | 11 | 0.01 |
| L04.9 Acute lymphadenitis, unspecified  | 11 | 0.01 |
| M46.2 Osteomyelitis of vertebra         | 11 | 0.01 |
| A01.2 Paratyphoid fever B               | 10 | 0.01 |
| A03.1 Shigellosis due to Shigella fle.. | 10 | 0.01 |
| B33.2 Viral carditis                    | 10 | 0.01 |
| B54 Unspecified malaria                 | 10 | 0.01 |
| B58.0 Toxoplasma oculopathy             | 10 | 0.01 |
| J14 Pneumonia due to Haemophilus infl.. | 10 | 0.01 |
| J16.0 Chlamydial pneumonia              | 10 | 0.01 |
| J20.5 Acute bronchitis due to respira.. | 10 | 0.01 |
| K61.3 Ischiorectal abscess              | 10 | 0.01 |
| L01.1 Impetiginization of other derma.. | 10 | 0.01 |
| N13.6 Pyonephrosis                      | 10 | 0.01 |
| A06.9 Amoebiasis, unspecified           | 9  | 0.01 |
| A39.4 Meningococcaemia, unspecified     | 9  | 0.01 |
| A63.8 Other specified predominantly s.. | 9  | 0.01 |
| A90 Dengue fever [classical dengue]     | 9  | 0.01 |
| B00.7 Disseminated herpesviral disease  | 9  | 0.01 |
| B08.8 Other specified viral infection.. | 9  | 0.01 |
| K77.0 Liver disorders in infectious a.. | 9  | 0.01 |
| M00.2 Other streptococcal arthritis a.. | 9  | 0.01 |
| A02.2 Localized salmonella infections   | 8  | 0.01 |
| A02.8 Other specified salmonella infe.. | 8  | 0.01 |
| A15.6 Tuberculous pleurisy, confirmed.. | 8  | 0.01 |
| A16.0 Tuberculosis of lung, bacteriol.. | 8  | 0.01 |
| A16.9 Respiratory tuberculosis unspec.. | 8  | 0.01 |
| A18.1 Tuberculosis of genitourinary s.. | 8  | 0.01 |
| A32.8 Other forms of listeriosis        | 8  | 0.01 |
| A49.1 Streptococcal infection, unspec.. | 8  | 0.01 |
| B02.2 Zoster with other nervous syste.. | 8  | 0.01 |
| B05.8 Measles with other complications  | 8  | 0.01 |
| B53.0 Plasmodium ovale malaria          | 8  | 0.01 |
| J20.8 Acute bronchitis due to other s.. | 8  | 0.01 |
| J39.1 Other abscess of pharynx          | 8  | 0.01 |
| M01.2 Arthritis in Lyme disease         | 8  | 0.01 |
| N08.0 Glomerular disorders in infecti.. | 8  | 0.01 |
| O07.0 Failed medical abortion, compli.. | 8  | 0.01 |

|                                         |   |      |
|-----------------------------------------|---|------|
| O07.5 Other and unspecified failed at.. | 8 | 0.01 |
| A01.0 Typhoid fever                     | 7 | 0.01 |
| A31.0 Pulmonary mycobacterial infection | 7 | 0.01 |
| A74.8 Other chlamydial diseases         | 7 | 0.01 |
| B36 Other superficial mycoses           | 7 | 0.01 |
| B80 Enterobiasis                        | 7 | 0.01 |
| J20.1 Acute bronchitis due to Haemoph.. | 7 | 0.01 |
| K02.8 Other dental caries               | 7 | 0.01 |
| O05.0 Other abortion: Incomplete, com.. | 7 | 0.01 |
| O05.5 Other abortion: Complete or uns.. | 7 | 0.01 |
| Z21 Asymptomatic human immunodeficien.. | 7 | 0.01 |
| A04.3 Enterohaemorrhagic Escherichia .. | 6 | 0.01 |
| A08.1 Acute gastroenteropathy due to .. | 6 | 0.01 |
| A08.2 Adenoviral enteritis              | 6 | 0.01 |
| A18.3 Tuberculosis of intestines, per.. | 6 | 0.01 |
| A32.7 Listerial sepsis                  | 6 | 0.01 |
| A48.0 Gas gangrene                      | 6 | 0.01 |
| A54.0 Gonococcal infection of lower g.. | 6 | 0.01 |
| B08.3 Erythema infectiosum [fifth dis.. | 6 | 0.01 |
| B18.9 Chronic viral hepatitis, unspec.. | 6 | 0.01 |
| B25.1 Cytomegaloviral hepatitis         | 6 | 0.01 |
| B35.3 Tinea pedis                       | 6 | 0.01 |
| B51.9 Plasmodium vivax malaria withou.. | 6 | 0.01 |
| B67 Echinococcosis                      | 6 | 0.01 |
| H10.5 Blepharconjunctivitis             | 6 | 0.01 |
| H62.1 Otitis externa in viral disease.. | 6 | 0.01 |
| J21.0 Acute bronchiolitis due to resp.. | 6 | 0.01 |
| J85.3 Abscess of mediastinum            | 6 | 0.01 |
| K05.0 Acute gingivitis                  | 6 | 0.01 |
| M65.1 Other infective (teno)synovitis   | 6 | 0.01 |
| N77.0 Ulceration of vulva in infectio.. | 6 | 0.01 |
| O06.0 Unspecified abortion: Incomplet.. | 6 | 0.01 |
| A03.9 Shigellosis, unspecified          | 5 | 0.01 |
| A06.0 Acute amoebic dysentery           | 5 | 0.01 |
| A15.2 Tuberculosis of lung, confirmed.. | 5 | 0.01 |
| A31 Infection due to other mycobacteria | 5 | 0.01 |
| A31.9 Mycobacterial infection, unspec.. | 5 | 0.01 |
| A60.9 Anogenital herpesviral infectio.. | 5 | 0.01 |
| B01.2 Varicella pneumonia               | 5 | 0.01 |
| B02.7 Disseminated zoster               | 5 | 0.01 |
| B08.5 Enteroviral vesicular pharyngitis | 5 | 0.01 |
| B37.4 Candidiasis of other urogenital.. | 5 | 0.01 |
| B74 Filariasis                          | 5 | 0.01 |
| B77.9 Ascariasis, unspecified           | 5 | 0.01 |
| B95.8 Unspecified staphylococcus as t.. | 5 | 0.01 |
| B97.1 Enterovirus as the cause of dis.. | 5 | 0.01 |
| H19.1 Herpesviral keratitis and kerat.. | 5 | 0.01 |
| H19.2 Keratitis and keratoconjunctivi.. | 5 | 0.01 |

|                                         |    |       |
|-----------------------------------------|----|-------|
| J12.1 Respiratory syncytial virus pne.. | 5  | 0.01  |
| J15.2 Pneumonia due to staphylococcus   | 5  | 0.01  |
| K57.8 Diverticular disease of intesti.. | 5  | 0.01  |
| L04.2 Acute lymphadenitis of upper limb | 5  | 0.01  |
| L04.8 Acute lymphadenitis of other si.. | 5  | 0.01  |
| M86.0 Acute haematogenous osteomyelitis | 5  | 0.01  |
| M86.2 Subacute osteomyelitis            | 5  | 0.01  |
| A00.9 Cholera, unspecified              | <5 | <0.01 |
| A01.1 Paratyphoid fever A               | <5 | <0.01 |
| A01.3 Paratyphoid fever C               | <5 | <0.01 |
| A03 Shigellosis                         | <5 | <0.01 |
| A03.0 Shigellosis due to Shigella dys.. | <5 | <0.01 |
| A03.2 Shigellosis due to Shigella boy.. | <5 | <0.01 |
| A04.0 Enteropathogenic Escherichia co.. | <5 | <0.01 |
| A04.2 Enteroinvasive Escherichia coli.. | <5 | <0.01 |
| A04.4 Other intestinal Escherichia co.. | <5 | <0.01 |
| A05.0 Foodborne staphylococcal intoxi.. | <5 | <0.01 |
| A05.1 Botulism                          | <5 | <0.01 |
| A05.2 Foodborne Clostridium perfringe.. | <5 | <0.01 |
| A05.8 Other specified bacterial foodb.. | <5 | <0.01 |
| A06.2 Amoebic nondysenteric colitis     | <5 | <0.01 |
| A06.4 Amoebic liver abscess             | <5 | <0.01 |
| A06.5 Amoebic lung abscess              | <5 | <0.01 |
| A06.8 Amoebic infection of other sites  | <5 | <0.01 |
| A07.0 Balantidiasis                     | <5 | <0.01 |
| A07.1 Giardiasis [lambliasis]           | <5 | <0.01 |
| A07.2 Cryptosporidiosis                 | <5 | <0.01 |
| A07.3 Isosporiasis                      | <5 | <0.01 |
| A07.9 Protozoal intestinal disease, u.. | <5 | <0.01 |
| A15.3 Tuberculosis of lung, confirmed.. | <5 | <0.01 |
| A15.4 Tuberculosis of intrathoracic l.. | <5 | <0.01 |
| A15.5 Tuberculosis of larynx, trachea.. | <5 | <0.01 |
| A15.7 Primary respiratory tuberculosi.. | <5 | <0.01 |
| A15.8 Other respiratory tuberculosis,.. | <5 | <0.01 |
| A15.9 Respiratory tuberculosis unspec.. | <5 | <0.01 |
| A16.1 Tuberculosis of lung, bacteriol.. | <5 | <0.01 |
| A16.3 Tuberculosis of intrathoracic l.. | <5 | <0.01 |
| A16.4 Tuberculosis of larynx, trachea.. | <5 | <0.01 |
| A16.7 Primary respiratory tuberculosi.. | <5 | <0.01 |
| A16.8 Other respiratory tuberculosis,.. | <5 | <0.01 |
| A17.8 Other tuberculosis of nervous s.. | <5 | <0.01 |
| A17.9 Tuberculosis of nervous system,.. | <5 | <0.01 |
| A18.4 Tuberculosis of skin and subcut.. | <5 | <0.01 |
| A18.8 Tuberculosis of other specified.. | <5 | <0.01 |
| A19.0 Acute miliary tuberculosis of a.. | <5 | <0.01 |
| A19.2 Acute miliary tuberculosis, uns.. | <5 | <0.01 |
| A19.9 Miliary tuberculosis, unspecified | <5 | <0.01 |
| A20.9 Plague, unspecified               | <5 | <0.01 |

|                                         |    |       |
|-----------------------------------------|----|-------|
| A21.1 Oculoglandular tularaemia         | <5 | <0.01 |
| A21.2 Pulmonary tularaemia              | <5 | <0.01 |
| A21.7 Generalized tularaemia            | <5 | <0.01 |
| A21.8 Other forms of tularaemia         | <5 | <0.01 |
| A22.0 Cutaneous anthrax                 | <5 | <0.01 |
| A22.2 Gastrointestinal anthrax          | <5 | <0.01 |
| A23.9 Brucellosis, unspecified          | <5 | <0.01 |
| A24.0 Glanders                          | <5 | <0.01 |
| A26.0 Cutaneous erysipeloid             | <5 | <0.01 |
| A26.9 Erysipeloid, unspecified          | <5 | <0.01 |
| A27 Leptospirosis                       | <5 | <0.01 |
| A27.0 Leptospirosis icterohaemorrhagica | <5 | <0.01 |
| A27.8 Other forms of leptospirosis      | <5 | <0.01 |
| A28.2 Extraintestinal yersiniosis       | <5 | <0.01 |
| A28.8 Other specified zoonotic bacter.. | <5 | <0.01 |
| A28.9 Zoonotic bacterial disease, uns.. | <5 | <0.01 |
| A30 Leprosy [Hansen disease]            | <5 | <0.01 |
| A31.1 Cutaneous mycobacterial infection | <5 | <0.01 |
| A31.8 Other mycobacterial infections    | <5 | <0.01 |
| A32.9 Listeriosis, unspecified          | <5 | <0.01 |
| A35 Other tetanus                       | <5 | <0.01 |
| A36 Diphtheria                          | <5 | <0.01 |
| A37.0 Whooping cough due to Bordetell.. | <5 | <0.01 |
| A37.9 Whooping cough, unspecified       | <5 | <0.01 |
| A39 Meningococcal infection             | <5 | <0.01 |
| A39.8 Other meningococcal infections    | <5 | <0.01 |
| A39.9 Meningococcal infection, unspec.. | <5 | <0.01 |
| A40 Streptococcal sepsis                | <5 | <0.01 |
| A40.2 Sepsis due to streptococcus, gr.. | <5 | <0.01 |
| A41 Other sepsis                        | <5 | <0.01 |
| A41.3 Sepsis due to Haemophilus influ.. | <5 | <0.01 |
| A42 Actinomycosis                       | <5 | <0.01 |
| A42.0 Pulmonary actinomycosis           | <5 | <0.01 |
| A42.1 Abdominal actinomycosis           | <5 | <0.01 |
| A42.2 Cervicofacial actinomycosis       | <5 | <0.01 |
| A42.7 Actinomycotic sepsis              | <5 | <0.01 |
| A42.8 Other forms of actinomycosis      | <5 | <0.01 |
| A42.9 Actinomycosis, unspecified        | <5 | <0.01 |
| A44.1 Cutaneous and mucocutaneous bar.. | <5 | <0.01 |
| A49.2 Haemophilus influenzae infectio.. | <5 | <0.01 |
| A49.3 Mycoplasma infection, unspecifi.. | <5 | <0.01 |
| A50 Congenital syphilis                 | <5 | <0.01 |
| A50.5 Other late congenital syphilis,.. | <5 | <0.01 |
| A50.9 Congenital syphilis, unspecified  | <5 | <0.01 |
| A51.2 Primary syphilis of other sites   | <5 | <0.01 |
| A51.4 Other secondary syphilis          | <5 | <0.01 |
| A51.5 Early syphilis, latent            | <5 | <0.01 |
| A51.9 Early syphilis, unspecified       | <5 | <0.01 |



|                                         |    |       |
|-----------------------------------------|----|-------|
| A52.0 Cardiovascular syphilis           | <5 | <0.01 |
| A52.7 Other symptomatic late syphilis   | <5 | <0.01 |
| A52.8 Late syphilis, latent             | <5 | <0.01 |
| A53 Other and unspecified syphilis      | <5 | <0.01 |
| A53.9 Syphilis, unspecified             | <5 | <0.01 |
| A54 Gonococcal infection                | <5 | <0.01 |
| A54.3 Gonococcal infection of eye       | <5 | <0.01 |
| A54.4 Gonococcal infection of musculo.. | <5 | <0.01 |
| A54.8 Other gonococcal infections       | <5 | <0.01 |
| A55 Chlamydial lymphogranuloma (vener.. | <5 | <0.01 |
| A56.2 Chlamydial infection of genitou.. | <5 | <0.01 |
| A56.3 Chlamydial infection of anus an.. | <5 | <0.01 |
| A56.8 Sexually transmitted chlamydial.. | <5 | <0.01 |
| A58 Granuloma inguinale                 | <5 | <0.01 |
| A60.1 Herpesviral infection of perian.. | <5 | <0.01 |
| A66.1 Multiple papillomata and wet cr.. | <5 | <0.01 |
| A66.3 Hyperkeratosis of yaws            | <5 | <0.01 |
| A67 Pinta [carate]                      | <5 | <0.01 |
| A67.1 Intermediate lesions of pinta     | <5 | <0.01 |
| A68 Relapsing fevers                    | <5 | <0.01 |
| A69.0 Necrotizing ulcerative stomatitis | <5 | <0.01 |
| A69.1 Other Vincent infections          | <5 | <0.01 |
| A69.9 Spirochaetal infection, unspeci.. | <5 | <0.01 |
| A71 Trachoma                            | <5 | <0.01 |
| A75.0 Epidemic louse-borne typhus fev.. | <5 | <0.01 |
| A75.9 Typhus fever, unspecified         | <5 | <0.01 |
| A77.1 Spotted fever due to Rickettsia.. | <5 | <0.01 |
| A78 Q fever                             | <5 | <0.01 |
| A79.9 Rickettsiosis, unspecified        | <5 | <0.01 |
| A92.8 Other specified mosquito-borne .. | <5 | <0.01 |
| A96.0 Junin haemorrhagic fever          | <5 | <0.01 |
| A98.0 Crimean-Congo haemorrhagic fever  | <5 | <0.01 |
| A98.1 Omsk haemorrhagic fever           | <5 | <0.01 |
| A98.3 Marburg virus disease             | <5 | <0.01 |
| A98.4 Ebola virus disease               | <5 | <0.01 |
| A99 Unspecified viral haemorrhagic fe.. | <5 | <0.01 |
| B02 Zoster [herpes zoster]              | <5 | <0.01 |
| B05 Measles                             | <5 | <0.01 |
| B05.3 Measles complicated by otitis m.. | <5 | <0.01 |
| B06.8 Rubella with other complications  | <5 | <0.01 |
| B08.0 Other orthopoxvirus infections    | <5 | <0.01 |
| B08.4 Enteroviral vesicular stomatiti.. | <5 | <0.01 |
| B16.1 Acute hepatitis B with delta-ag.. | <5 | <0.01 |
| B17.2 Acute hepatitis E                 | <5 | <0.01 |
| B17.8 Other specified acute viral hep.. | <5 | <0.01 |
| B18.0 Chronic viral hepatitis B with .. | <5 | <0.01 |
| B20.0 HIV disease resulting in mycoba.. | <5 | <0.01 |
| B20.6 HIV disease resulting in Pneumo.. | <5 | <0.01 |

|                                         |    |       |
|-----------------------------------------|----|-------|
| B21.2 HIV disease resulting in other .. | <5 | <0.01 |
| B23.8 HIV disease resulting in other .. | <5 | <0.01 |
| B25.0 Cytomegaloviral pneumonitis       | <5 | <0.01 |
| B26 Mumps                               | <5 | <0.01 |
| B26.8 Mumps with other complications    | <5 | <0.01 |
| B27.8 Other infectious mononucleosis    | <5 | <0.01 |
| B30.8 Other viral conjunctivitis        | <5 | <0.01 |
| B33.0 Epidemic myalgia                  | <5 | <0.01 |
| B34.3 Parvovirus infection, unspecifi.. | <5 | <0.01 |
| B35.0 Tinea barbae and tinea capitis    | <5 | <0.01 |
| B35.2 Tinea manuum                      | <5 | <0.01 |
| B35.4 Tinea corporis                    | <5 | <0.01 |
| B35.6 Tinea cruris                      | <5 | <0.01 |
| B35.9 Dermatophytosis, unspecified      | <5 | <0.01 |
| B36.0 Pityriasis versicolor             | <5 | <0.01 |
| B36.9 Superficial mycosis, unspecified  | <5 | <0.01 |
| B37.2 Candidiasis of skin and nail      | <5 | <0.01 |
| B37.9 Candidiasis, unspecified          | <5 | <0.01 |
| B38 Coccidioidomycosis                  | <5 | <0.01 |
| B38.0 Acute pulmonary coccidioidomyco.. | <5 | <0.01 |
| B39.3 Disseminated histoplasmosis cap.. | <5 | <0.01 |
| B39.4 Histoplasmosis capsulati, unspe.. | <5 | <0.01 |
| B41.0 Pulmonary paracoccidioidomycosis  | <5 | <0.01 |
| B43.9 Chromomycosis, unspecified        | <5 | <0.01 |
| B44.9 Aspergillosis, unspecified        | <5 | <0.01 |
| B47.9 Mycetoma, unspecified             | <5 | <0.01 |
| B48.1 Rhinosporidiosis                  | <5 | <0.01 |
| B49 Unspecified mycosis                 | <5 | <0.01 |
| B50.0 Plasmodium falciparum malaria w.. | <5 | <0.01 |
| B50.8 Other severe and complicated Pl.. | <5 | <0.01 |
| B51 Plasmodium vivax malaria            | <5 | <0.01 |
| B51.0 Plasmodium vivax malaria with r.. | <5 | <0.01 |
| B52.0 Plasmodium malariae malaria wit.. | <5 | <0.01 |
| B52.9 Plasmodium malariae malaria wit.. | <5 | <0.01 |
| B55.2 Mucocutaneous leishmaniasis       | <5 | <0.01 |
| B58.8 Toxoplasmosis with other organ .. | <5 | <0.01 |
| B60.8 Other specified protozoal disea.. | <5 | <0.01 |
| B65.0 Schistosomiasis due to Schistos.. | <5 | <0.01 |
| B65.1 Schistosomiasis due to Schistos.. | <5 | <0.01 |
| B65.2 Schistosomiasis due to Schistos.. | <5 | <0.01 |
| B65.9 Schistosomiasis, unspecified      | <5 | <0.01 |
| B66 Other fluke infections              | <5 | <0.01 |
| B67.3 Echinococcus granulosus infecti.. | <5 | <0.01 |
| B67.8 Echinococcosis, unspecified, of.. | <5 | <0.01 |
| B67.9 Echinococcosis, other and unspe.. | <5 | <0.01 |
| B68.0 Taenia solium taeniasis           | <5 | <0.01 |
| B68.1 Taenia saginata taeniasis         | <5 | <0.01 |
| B68.9 Taeniasis, unspecified            | <5 | <0.01 |

|                                         |    |       |
|-----------------------------------------|----|-------|
| B71.0 Hymenolepiasis                    | <5 | <0.01 |
| B75 Trichinellosis                      | <5 | <0.01 |
| B76 Hookworm diseases                   | <5 | <0.01 |
| B78.0 Intestinal strongyloidiasis       | <5 | <0.01 |
| B79 Trichuriasis                        | <5 | <0.01 |
| B81.0 Anisakiasis                       | <5 | <0.01 |
| B81.4 Mixed intestinal helminthiasis    | <5 | <0.01 |
| B82.9 Intestinal parasitism, unspecif.. | <5 | <0.01 |
| B83.0 Visceral larva migrans            | <5 | <0.01 |
| B83.9 Helminthiasis, unspecified        | <5 | <0.01 |
| B85.1 Pediculosis due to Pediculus hu.. | <5 | <0.01 |
| B87.1 Wound myiasis                     | <5 | <0.01 |
| B87.9 Myiasis, unspecified              | <5 | <0.01 |
| B95.0 Streptococcus, group A, as the .. | <5 | <0.01 |
| B95.1 Streptococcus, group B, as the .. | <5 | <0.01 |
| B95.3 Streptococcus pneumoniae as the.. | <5 | <0.01 |
| B95.4 Other streptococcus as the caus.. | <5 | <0.01 |
| B95.5 Unspecified streptococcus as th.. | <5 | <0.01 |
| B95.6 Staphylococcus aureus as the ca.. | <5 | <0.01 |
| B95.7 Other staphylococcus as the cau.. | <5 | <0.01 |
| B96.1 Klebsiella pneumoniae [K. pneum.. | <5 | <0.01 |
| B96.2 Escherichia coli [E. coli] as t.. | <5 | <0.01 |
| B96.3 Haemophilus influenzae [H. infl.. | <5 | <0.01 |
| B96.5 Pseudomonas (aeruginosa) as the.. | <5 | <0.01 |
| B96.8 Other specified bacterial agent.. | <5 | <0.01 |
| B97.4 Respiratory syncytial virus as .. | <5 | <0.01 |
| D73.3 Abscess of spleen                 | <5 | <0.01 |
| H01.0 Blepharitis                       | <5 | <0.01 |
| H19.0 Scleritis and episcleritis in d.. | <5 | <0.01 |
| H22.0 Iridocyclitis in infectious and.. | <5 | <0.01 |
| H32.0 Chorioretinal inflammation in i.. | <5 | <0.01 |
| H60.2 Malignant otitis externa          | <5 | <0.01 |
| I32.0 Pericarditis in bacterial disea.. | <5 | <0.01 |
| I41.1 Myocarditis in viral diseases c.. | <5 | <0.01 |
| J02.8 Acute pharyngitis due to other .. | <5 | <0.01 |
| J03 Acute tonsillitis                   | <5 | <0.01 |
| J10 Influenza due to other identified.. | <5 | <0.01 |
| J11 Influenza, virus not identified     | <5 | <0.01 |
| J12.0 Adenoviral pneumonia              | <5 | <0.01 |
| J12.2 Parainfluenza virus pneumonia     | <5 | <0.01 |
| J12.8 Other viral pneumonia             | <5 | <0.01 |
| J15.0 Pneumonia due to Klebsiella pne.. | <5 | <0.01 |
| J15.1 Pneumonia due to Pseudomonas      | <5 | <0.01 |
| J15.3 Pneumonia due to streptococcus,.. | <5 | <0.01 |
| J15.4 Pneumonia due to other streptoc.. | <5 | <0.01 |
| J15.5 Pneumonia due to Escherichia coli | <5 | <0.01 |
| J15.6 Pneumonia due to other aerobic .. | <5 | <0.01 |
| J17.0 Pneumonia in bacterial diseases.. | <5 | <0.01 |

|                                         |               |            |
|-----------------------------------------|---------------|------------|
| J17.1 Pneumonia in viral diseases cla.. | <5            | <0.01      |
| J17.2 Pneumonia in mycoses              | <5            | <0.01      |
| J18.2 Hypostatic pneumonia, unspecified | <5            | <0.01      |
| J20 Acute bronchitis                    | <5            | <0.01      |
| J20.2 Acute bronchitis due to strepto.. | <5            | <0.01      |
| J20.4 Acute bronchitis due to parainf.. | <5            | <0.01      |
| J20.6 Acute bronchitis due to rhinovi.. | <5            | <0.01      |
| J21.8 Acute bronchiolitis due to othe.. | <5            | <0.01      |
| K02.0 Caries limited to enamel          | <5            | <0.01      |
| K02.2 Caries of cementum                | <5            | <0.01      |
| K02.3 Arrested dental caries            | <5            | <0.01      |
| K23.0 Tuberculous oesophagitis          | <5            | <0.01      |
| K61.4 Intrasphincteric abscess          | <5            | <0.01      |
| K67.3 Tuberculous peritonitis           | <5            | <0.01      |
| K67.8 Other disorders of peritoneum i.. | <5            | <0.01      |
| L00 Staphylococcal scalded skin syndr.. | <5            | <0.01      |
| L04.1 Acute lymphadenitis of trunk      | <5            | <0.01      |
| L04.3 Acute lymphadenitis of lower limb | <5            | <0.01      |
| L08.1 Erythrasma                        | <5            | <0.01      |
| M00.8 Arthritis and polyarthritis due.. | <5            | <0.01      |
| M01.0 Meningococcal arthritis           | <5            | <0.01      |
| M01.1 Tuberculous arthritis             | <5            | <0.01      |
| M01.3 Arthritis in other bacterial di.. | <5            | <0.01      |
| M46.5 Other infective spondylopathies   | <5            | <0.01      |
| M49.0 Tuberculosis of spine             | <5            | <0.01      |
| M49.1 Brucella spondylitis              | <5            | <0.01      |
| M49.3 Spondylopathy in other infectio.. | <5            | <0.01      |
| M63.0 Myositis in bacterial diseases .. | <5            | <0.01      |
| M72.6 Necrotizing fasciitis             | <5            | <0.01      |
| M86.3 Chronic multifocal osteomyelitis  | <5            | <0.01      |
| M86.4 Chronic osteomyelitis with drai.. | <5            | <0.01      |
| M86.8 Other osteomyelitis               | <5            | <0.01      |
| N16.0 Renal tubulo-interstitial disor.. | <5            | <0.01      |
| O23.2 Infections of urethra in pregna.. | <5            | <0.01      |
| O23.3 Infections of other parts of ur.. | <5            | <0.01      |
| O98.0 Tuberculosis complicating pregn.. | <5            | <0.01      |
| O98.1 Syphilis complicating pregnancy.. | <5            | <0.01      |
| O98.6 Protozoal diseases complicating.. | <5            | <0.01      |
| P36.9 Bacterial sepsis of newborn, un.. | <5            | <0.01      |
| P37.1 Congenital toxoplasmosis          | <5            | <0.01      |
| P37.9 Congenital infectious and paras.. | <5            | <0.01      |
| P39.0 Neonatal infective mastitis       | <5            | <0.01      |
| P39.1 Neonatal conjunctivitis and dac.. | <5            | <0.01      |
| P39.9 Infection specific to the perin.. | <5            | <0.01      |
| R57.2 Septic shock                      | <5            | <0.01      |
| <b>Total</b>                            | <b>76 301</b> | <b>100</b> |

**eTable 23. Distribution of acute infections in primary analysis (Finnish multicohort sample)**

| ICD-10 code and description             | N      | %     |
|-----------------------------------------|--------|-------|
| K35 Acute appendicitis                  | 12 007 | 16.32 |
| J18.9 Pneumonia, unspecified            | 6204   | 8.43  |
| A09 Other gastroenteritis and colitis.. | 5703   | 7.75  |
| N10 Acute tubulo-interstitial nephritis | 3650   | 4.96  |
| A46 Erysipelas                          | 3167   | 4.31  |
| J03.9 Acute tonsillitis, unspecified    | 3138   | 4.27  |
| J36 Peritonsillar abscess               | 3090   | 4.20  |
| J15.9 Bacterial pneumonia, unspecified  | 2284   | 3.10  |
| N70.0 Acute salpingitis and oophoritis  | 1981   | 2.69  |
| O85 Puerperal sepsis                    | 1749   | 2.38  |
| J20.9 Acute bronchitis, unspecified     | 1185   | 1.61  |
| N39.0 Urinary tract infection, site n.. | 1081   | 1.47  |
| J01.0 Acute maxillary sinusitis         | 1063   | 1.45  |
| A49.9 Bacterial infection, unspecified  | 1060   | 1.44  |
| J03.0 Streptococcal tonsillitis         | 949    | 1.29  |
| A08.4 Viral intestinal infection, uns.. | 835    | 1.14  |
| J22 Unspecified acute lower respirato.. | 784    | 1.07  |
| N71.0 Acute inflammatory disease of u.. | 730    | 0.99  |
| J02.9 Acute pharyngitis, unspecified    | 704    | 0.96  |
| J04.0 Acute laryngitis                  | 684    | 0.93  |
| B34.9 Viral infection, unspecified      | 623    | 0.85  |
| A98.5 Haemorrhagic fever with renal s.. | 587    | 0.80  |
| A08.5 Other specified intestinal infe.. | 493    | 0.67  |
| K57.2 Diverticular disease of large i.. | 459    | 0.62  |
| N30.0 Acute cystitis                    | 449    | 0.61  |
| J18.0 Bronchopneumonia, unspecified     | 448    | 0.61  |
| A41.5 Sepsis due to other Gram-negati.. | 421    | 0.57  |
| L05.9 Pilonidal cyst without abscess    | 398    | 0.54  |
| O08.0 Genital tract and pelvic infect.. | 377    | 0.51  |
| O03.5 Spontaneous abortion: Complete .. | 368    | 0.50  |
| K61.0 Anal abscess                      | 339    | 0.46  |
| A04.7 Enterocolitis due to Clostridiu.. | 311    | 0.42  |
| H66.0 Acute suppurative otitis media    | 303    | 0.41  |
| N75.1 Abscess of Bartholin gland        | 301    | 0.41  |
| J11.1 Influenza with other respirator.. | 287    | 0.39  |
| A41.9 Sepsis, unspecified               | 284    | 0.39  |
| K04.7 Periapical abscess without sinus  | 281    | 0.38  |
| B06.9 Rubella without complication      | 280    | 0.38  |
| J13 Pneumonia due to Streptococcus pn.. | 277    | 0.38  |
| N61 Inflammatory disorders of breast    | 258    | 0.35  |
| J11.8 Influenza with other manifestat.. | 257    | 0.35  |
| A69.2 Lyme disease                      | 239    | 0.32  |
| L04 Acute lymphadenitis                 | 227    | 0.31  |
| M00.9 Pyogenic arthritis, unspecified   | 214    | 0.29  |
| N45.9 Orchitis, epididymitis and epid.. | 212    | 0.29  |

|                                         |     |      |
|-----------------------------------------|-----|------|
| J10.1 Influenza with other respirator.. | 210 | 0.29 |
| B99 Other and unspecified infectious .. | 201 | 0.27 |
| L03.0 Cellulitis of finger and toe      | 201 | 0.27 |
| A04.5 Campylobacter enteritis           | 196 | 0.27 |
| A87.9 Viral meningitis, unspecified     | 185 | 0.25 |
| K12.2 Cellulitis and abscess of mouth   | 184 | 0.25 |
| K65.0 Acute peritonitis                 | 182 | 0.25 |
| O23.5 Infections of the genital tract.. | 179 | 0.24 |
| O23.0 Infections of kidney in pregnancy | 177 | 0.24 |
| K61 Abscess of anal and rectal regions  | 176 | 0.24 |
| O03.0 Spontaneous abortion: Incomplet.. | 175 | 0.24 |
| J05.1 Acute epiglottitis                | 174 | 0.24 |
| L08.9 Local infection of skin and sub.. | 173 | 0.24 |
| A41.0 Sepsis due to Staphylococcus au.. | 171 | 0.23 |
| O86.0 Infection of obstetric surgical.. | 168 | 0.23 |
| L02 Cutaneous abscess, furuncle and c.. | 165 | 0.22 |
| O23.9 Other and unspecified genitouri.. | 162 | 0.22 |
| A02.0 Salmonella enteritis              | 156 | 0.21 |
| L02.4 Cutaneous abscess, furuncle and.. | 153 | 0.21 |
| A41.8 Other specified sepsis            | 151 | 0.21 |
| J15.8 Other bacterial pneumonia         | 148 | 0.20 |
| B19.9 Unspecified viral hepatitis wit.. | 145 | 0.20 |
| J12 Viral pneumonia, not elsewhere cl.. | 144 | 0.20 |
| A89 Unspecified viral infection of ce.. | 137 | 0.19 |
| B07 Viral warts                         | 136 | 0.18 |
| O86.1 Other infection of genital trac.. | 132 | 0.18 |
| A87.0 Enteroviral meningitis            | 131 | 0.18 |
| L05.0 Pilonidal cyst with abscess       | 126 | 0.17 |
| G00.9 Bacterial meningitis, unspecified | 125 | 0.17 |
| O86.4 Pyrexia of unknown origin follo.. | 122 | 0.17 |
| J18.1 Lobar pneumonia, unspecified      | 117 | 0.16 |
| K05.2 Acute periodontitis               | 116 | 0.16 |
| A40.3 Sepsis due to Streptococcus pne.. | 113 | 0.15 |
| A02 Other salmonella infections         | 110 | 0.15 |
| A86 Unspecified viral encephalitis      | 106 | 0.14 |
| B97.8 Other viral agents as the cause.. | 102 | 0.14 |
| L04.0 Acute lymphadenitis of face, he.. | 102 | 0.14 |
| A56.1 Chlamydial infection of pelvipe.. | 100 | 0.14 |
| L03.1 Cellulitis of other parts of limb | 98  | 0.13 |
| J15.7 Pneumonia due to Mycoplasma pne.. | 93  | 0.13 |
| O23.4 Unspecified infection of urinar.. | 93  | 0.13 |
| L02.2 Cutaneous abscess, furuncle and.. | 92  | 0.13 |
| O04.0 Medical abortion: Incomplete, c.. | 90  | 0.12 |
| B05.9 Measles without complication      | 89  | 0.12 |
| A49.8 Other bacterial infections of u.. | 87  | 0.12 |
| A04.9 Bacterial intestinal infection,.. | 86  | 0.12 |
| O23.1 Infections of bladder in pregna.. | 85  | 0.12 |
| L02.3 Cutaneous abscess, furuncle and.. | 82  | 0.11 |

|                                         |    |      |
|-----------------------------------------|----|------|
| H10.0 Mucopurulent conjunctivitis       | 81 | 0.11 |
| J86.9 Pyothorax without fistula         | 80 | 0.11 |
| A95 Yellow fever                        | 79 | 0.11 |
| H00.1 Chalazion                         | 79 | 0.11 |
| J16.8 Pneumonia due to other specific.. | 77 | 0.10 |
| B34.8 Other viral infections of unspe.. | 76 | 0.10 |
| M71.1 Other infective bursitis          | 76 | 0.10 |
| L03.9 Cellulitis, unspecified           | 75 | 0.10 |
| O86.2 Urinary tract infection followi.. | 75 | 0.10 |
| H60.3 Other infective otitis externa    | 74 | 0.10 |
| A54.9 Gonococcal infection, unspecified | 73 | 0.10 |
| N41.0 Acute prostatitis                 | 73 | 0.10 |
| A08.3 Other viral enteritis             | 72 | 0.10 |
| M86.9 Osteomyelitis, unspecified        | 72 | 0.10 |
| I33.0 Acute and subacute infective en.. | 71 | 0.10 |
| L08.8 Other specified local infection.. | 71 | 0.10 |
| G03.9 Meningitis, unspecified           | 70 | 0.10 |
| N76.4 Abscess of vulva                  | 69 | 0.09 |
| J39.0 Retropharyngeal and parapharyng.. | 68 | 0.09 |
| B26.2 Mumps encephalitis                | 67 | 0.09 |
| O04.5 Medical abortion: Complete or u.. | 67 | 0.09 |
| K57.0 Diverticular disease of small i.. | 66 | 0.09 |
| J09 Influenza due to certain identifi.. | 63 | 0.09 |
| M86.1 Other acute osteomyelitis         | 63 | 0.09 |
| O75.3 Other infection during labour     | 61 | 0.08 |
| O86.8 Other specified puerperal infec.. | 61 | 0.08 |
| A04.8 Other specified bacterial intes.. | 60 | 0.08 |
| O98.8 Other maternal infectious and p.. | 60 | 0.08 |
| J10.0 Influenza with pneumonia, other.. | 59 | 0.08 |
| A54.2 Gonococcal pelviperitonitis and.. | 58 | 0.08 |
| N77.1 Vaginitis, vulvitis and vulvova.. | 57 | 0.08 |
| H62.0 Otitis externa in bacterial dis.. | 56 | 0.08 |
| L02.1 Cutaneous abscess, furuncle and.. | 55 | 0.07 |
| A74.9 Chlamydial infection, unspecified | 54 | 0.07 |
| B09 Unspecified viral infection chara.. | 54 | 0.07 |
| L02.9 Cutaneous abscess, furuncle and.. | 54 | 0.07 |
| O91.1 Abscess of breast associated wi.. | 52 | 0.07 |
| N73.3 Female acute pelvic peritonitis   | 51 | 0.07 |
| O98.5 Other viral diseases complicati.. | 51 | 0.07 |
| A38 Scarlet fever                       | 49 | 0.07 |
| A40.8 Other streptococcal sepsis        | 47 | 0.06 |
| H00.0 Hordeolum and other deep inflam.. | 46 | 0.06 |
| A56.0 Chlamydial infection of lower g.. | 44 | 0.06 |
| H05.0 Acute inflammation of orbit       | 44 | 0.06 |
| G00.8 Other bacterial meningitis        | 42 | 0.06 |
| A40.9 Streptococcal sepsis, unspecified | 41 | 0.06 |
| B08.1 Molluscum contagiosum             | 41 | 0.06 |
| J20.0 Acute bronchitis due to Mycopla.. | 41 | 0.06 |

|                                         |    |      |
|-----------------------------------------|----|------|
| B15.9 Hepatitis A without hepatic coma  | 40 | 0.05 |
| J11.0 Influenza with pneumonia, virus.. | 40 | 0.05 |
| L03.2 Cellulitis of face                | 40 | 0.05 |
| A40.0 Sepsis due to streptococcus, gr.. | 39 | 0.05 |
| I40.0 Infective myocarditis             | 39 | 0.05 |
| L02.0 Cutaneous abscess, furuncle and.. | 39 | 0.05 |
| A08.0 Rotaviral enteritis               | 38 | 0.05 |
| A41.1 Sepsis due to other specified s.. | 38 | 0.05 |
| J02.0 Streptococcal pharyngitis         | 38 | 0.05 |
| K61.1 Rectal abscess                    | 38 | 0.05 |
| L08.0 Pyoderma                          | 38 | 0.05 |
| O98.3 Other infections with a predomi.. | 38 | 0.05 |
| J12.9 Viral pneumonia, unspecified      | 37 | 0.05 |
| J18.8 Other pneumonia, organism unspe.. | 37 | 0.05 |
| A49.0 Staphylococcal infection, unspe.. | 35 | 0.05 |
| J04.2 Acute laryngotracheitis           | 35 | 0.05 |
| L02.8 Cutaneous abscess, furuncle and.. | 35 | 0.05 |
| M71.0 Abscess of bursa                  | 35 | 0.05 |
| B33.8 Other specified viral diseases    | 34 | 0.05 |
| B59 Pneumocystosis                      | 33 | 0.04 |
| H60.1 Cellulitis of external ear        | 33 | 0.04 |
| M86.6 Other chronic osteomyelitis       | 33 | 0.04 |
| A04.6 Enteritis due to Yersinia enter.. | 32 | 0.04 |
| H70.0 Acute mastoiditis                 | 32 | 0.04 |
| G05.1 Encephalitis, myelitis and ence.. | 31 | 0.04 |
| A02.1 Salmonella sepsis                 | 30 | 0.04 |
| A39.0 Meningococcal meningitis          | 30 | 0.04 |
| A59.0 Urogenital trichomoniasis         | 29 | 0.04 |
| B16.9 Acute hepatitis B without delta.. | 29 | 0.04 |
| G00.0 Haemophilus meningitis            | 29 | 0.04 |
| H60.0 Abscess of external ear           | 29 | 0.04 |
| J85.2 Abscess of lung without pneumonia | 29 | 0.04 |
| N73.0 Acute parametritis and pelvic c.. | 28 | 0.04 |
| A37 Whooping cough                      | 26 | 0.04 |
| J10.8 Influenza with other manifestat.. | 26 | 0.04 |
| J86.0 Pyothorax with fistula            | 26 | 0.04 |
| M00.0 Staphylococcal arthritis and po.. | 26 | 0.04 |
| A05.9 Bacterial foodborne intoxicatio.. | 25 | 0.03 |
| A41.2 Sepsis due to unspecified staph.. | 25 | 0.03 |
| H44.0 Purulent endophthalmitis          | 24 | 0.03 |
| I30.1 Infective pericarditis            | 24 | 0.03 |
| K63.0 Abscess of intestine              | 24 | 0.03 |
| J21.9 Acute bronchiolitis, unspecified  | 23 | 0.03 |
| K04.4 Acute apical periodontitis of p.. | 23 | 0.03 |
| K75.0 Abscess of liver                  | 23 | 0.03 |
| O98.4 Viral hepatitis complicating pr.. | 23 | 0.03 |
| G00.1 Pneumococcal meningitis           | 22 | 0.03 |
| M65.0 Abscess of tendon sheath          | 22 | 0.03 |



|                                         |    |      |
|-----------------------------------------|----|------|
| O86.3 Other genitourinary tract infec.. | 22 | 0.03 |
| O98.9 Unspecified maternal infectious.. | 22 | 0.03 |
| B34.0 Adenovirus infection, unspecifi.. | 21 | 0.03 |
| K11.3 Abscess of salivary gland         | 21 | 0.03 |
| K61.2 Anorectal abscess                 | 21 | 0.03 |
| L03.3 Cellulitis of trunk               | 21 | 0.03 |
| A21.9 Tularaemia, unspecified           | 20 | 0.03 |
| A54.1 Gonococcal infection of lower g.. | 20 | 0.03 |
| B17.1 Acute hepatitis C                 | 20 | 0.03 |
| B50.9 Plasmodium falciparum malaria, .. | 20 | 0.03 |
| G02.0 Meningitis in viral diseases cl.. | 20 | 0.03 |
| G06.0 Intracranial abscess and granul.. | 20 | 0.03 |
| N76.0 Acute vaginitis                   | 20 | 0.03 |
| A21.0 Ulceroglandular tularaemia        | 19 | 0.03 |
| A48.8 Other specified bacterial disea.. | 18 | 0.02 |
| A80 Acute poliomyelitis                 | 18 | 0.02 |
| G01 Meningitis in bacterial diseases .. | 18 | 0.02 |
| I42.1 Obstructive hypertrophic cardio.. | 18 | 0.02 |
| J04.1 Acute tracheitis                  | 18 | 0.02 |
| N74.4 Female chlamydial pelvic inflam.. | 18 | 0.02 |
| A88.8 Other specified viral infection.. | 17 | 0.02 |
| B26.9 Mumps without complication        | 17 | 0.02 |
| J86 Pyothorax                           | 17 | 0.02 |
| N15.1 Renal and perinephric abscess     | 17 | 0.02 |
| A07 Other protozoal intestinal diseases | 16 | 0.02 |
| A40.1 Sepsis due to streptococcus, gr.. | 16 | 0.02 |
| A41.4 Sepsis due to anaerobes           | 16 | 0.02 |
| L01.0 Impetigo [any organism] [any si.. | 16 | 0.02 |
| L03.8 Cellulitis of other sites         | 15 | 0.02 |
| M46.3 Infection of intervertebral dis.. | 15 | 0.02 |
| N45.0 Orchitis, epididymitis and epid.. | 15 | 0.02 |
| O91.0 Infection of nipple associated .. | 15 | 0.02 |
| A02.9 Salmonella infection, unspecified | 14 | 0.02 |
| K57.4 Diverticular disease of both sm.. | 14 | 0.02 |
| A03.3 Shigellosis due to Shigella son.. | 13 | 0.02 |
| B97.0 Adenovirus as the cause of dise.. | 13 | 0.02 |
| J03.8 Acute tonsillitis due to other .. | 13 | 0.02 |
| N34.0 Urethral abscess                  | 13 | 0.02 |
| A01.4 Paratyphoid fever, unspecified    | 12 | 0.02 |
| A64 Unspecified sexually transmitted .. | 12 | 0.02 |
| B30 Viral conjunctivitis                | 12 | 0.02 |
| G06.1 Intrapinal abscess and granuloma  | 12 | 0.02 |
| J14 Pneumonia due to Haemophilus infl.. | 12 | 0.02 |
| J85.1 Abscess of lung with pneumonia    | 12 | 0.02 |
| L01 Impetigo                            | 12 | 0.02 |
| M60.0 Infective myositis                | 12 | 0.02 |
| O06.5 Unspecified abortion: Complete .. | 12 | 0.02 |
| B06 Rubella [German measles]            | 11 | 0.01 |

|                                         |    |      |
|-----------------------------------------|----|------|
| B26.0 Mumps orchitis                    | 11 | 0.01 |
| B34.1 Enterovirus infection, unspecif.. | 11 | 0.01 |
| L04.9 Acute lymphadenitis, unspecified  | 11 | 0.01 |
| M46.2 Osteomyelitis of vertebra         | 11 | 0.01 |
| A01.2 Paratyphoid fever B               | 10 | 0.01 |
| A03.1 Shigellosis due to Shigella fle.. | 10 | 0.01 |
| A39.2 Acute meningococcaemia            | 10 | 0.01 |
| A63.8 Other specified predominantly s.. | 10 | 0.01 |
| A87.8 Other viral meningitis            | 10 | 0.01 |
| B54 Unspecified malaria                 | 10 | 0.01 |
| J16.0 Chlamydial pneumonia              | 10 | 0.01 |
| J20.5 Acute bronchitis due to respira.. | 10 | 0.01 |
| K61.3 Ischiorectal abscess              | 10 | 0.01 |
| L01.1 Impetiginization of other derma.. | 10 | 0.01 |
| N13.6 Pyonephrosis                      | 10 | 0.01 |
| A06.9 Amoebiasis, unspecified           | 9  | 0.01 |
| A90 Dengue fever [classical dengue]     | 9  | 0.01 |
| B08.8 Other specified viral infection.. | 9  | 0.01 |
| B33.2 Viral carditis                    | 9  | 0.01 |
| K77.0 Liver disorders in infectious a.. | 9  | 0.01 |
| M00.2 Other streptococcal arthritis a.. | 9  | 0.01 |
| M01.2 Arthritis in Lyme disease         | 9  | 0.01 |
| A02.2 Localized salmonella infections   | 8  | 0.01 |
| A02.8 Other specified salmonella infe.. | 8  | 0.01 |
| A32.8 Other forms of listeriosis        | 8  | 0.01 |
| A39.4 Meningococcaemia, unspecified     | 8  | 0.01 |
| A49.1 Streptococcal infection, unspec.. | 8  | 0.01 |
| A54.0 Gonococcal infection of lower g.. | 8  | 0.01 |
| B05.8 Measles with other complications  | 8  | 0.01 |
| B26.3 Mumps pancreatitis                | 8  | 0.01 |
| J20.8 Acute bronchitis due to other s.. | 8  | 0.01 |
| J39.1 Other abscess of pharynx          | 8  | 0.01 |
| N77.0 Ulceration of vulva in infectio.. | 8  | 0.01 |
| O07.0 Failed medical abortion, compli.. | 8  | 0.01 |
| O07.5 Other and unspecified failed at.. | 8  | 0.01 |
| A01.0 Typhoid fever                     | 7  | 0.01 |
| A84.8 Other tick-borne viral encephal.. | 7  | 0.01 |
| J20.1 Acute bronchitis due to Haemoph.. | 7  | 0.01 |
| K05.0 Acute gingivitis                  | 7  | 0.01 |
| N08.0 Glomerular disorders in infecti.. | 7  | 0.01 |
| O05.0 Other abortion: Incomplete, com.. | 7  | 0.01 |
| O05.5 Other abortion: Complete or uns.. | 7  | 0.01 |
| A04.3 Enterohaemorrhagic Escherichia .. | 6  | 0.01 |
| A06.0 Acute amoebic dysentery           | 6  | 0.01 |
| A08.1 Acute gastroenteropathy due to .. | 6  | 0.01 |
| A08.2 Adenoviral enteritis              | 6  | 0.01 |
| A32.7 Listerial sepsis                  | 6  | 0.01 |
| A48.0 Gas gangrene                      | 6  | 0.01 |

|                                         |    |       |
|-----------------------------------------|----|-------|
| A74.8 Other chlamydial diseases         | 6  | 0.01  |
| B08.3 Erythema infectiosum [fifth dis.. | 6  | 0.01  |
| B19.0 Unspecified viral hepatitis wit.. | 6  | 0.01  |
| H10.5 Blepharconjunctivitis             | 6  | 0.01  |
| H62.1 Otitis externa in viral disease.. | 6  | 0.01  |
| J21.0 Acute bronchiolitis due to resp.. | 6  | 0.01  |
| J85.3 Abscess of mediastinum            | 6  | 0.01  |
| M65.1 Other infective (teno)synovitis   | 6  | 0.01  |
| O06.0 Unspecified abortion: Incomplet.. | 6  | 0.01  |
| A03.9 Shigellosis, unspecified          | 5  | 0.01  |
| A84.9 Tick-borne viral encephalitis, .. | 5  | 0.01  |
| B08.5 Enteroviral vesicular pharyngitis | 5  | 0.01  |
| B95.8 Unspecified staphylococcus as t.. | 5  | 0.01  |
| B97.1 Enterovirus as the cause of dis.. | 5  | 0.01  |
| G03.8 Meningitis due to other specifi.. | 5  | 0.01  |
| H19.2 Keratitis and keratoconjunctivi.. | 5  | 0.01  |
| J12.1 Respiratory syncytial virus pne.. | 5  | 0.01  |
| J15.2 Pneumonia due to staphylococcus   | 5  | 0.01  |
| K57.8 Diverticular disease of intesti.. | 5  | 0.01  |
| L04.2 Acute lymphadenitis of upper limb | 5  | 0.01  |
| L04.8 Acute lymphadenitis of other si.. | 5  | 0.01  |
| M86.0 Acute haematogenous osteomyelitis | 5  | 0.01  |
| M86.2 Subacute osteomyelitis            | 5  | 0.01  |
| A00.9 Cholera, unspecified              | <5 | <0.01 |
| A01.1 Paratyphoid fever A               | <5 | <0.01 |
| A01.3 Paratyphoid fever C               | <5 | <0.01 |
| A03 Shigellosis                         | <5 | <0.01 |
| A03.0 Shigellosis due to Shigella dys.. | <5 | <0.01 |
| A03.2 Shigellosis due to Shigella boy.. | <5 | <0.01 |
| A04.0 Enteropathogenic Escherichia co.. | <5 | <0.01 |
| A04.2 Enteroinvasive Escherichia coli.. | <5 | <0.01 |
| A04.4 Other intestinal Escherichia co.. | <5 | <0.01 |
| A05.0 Foodborne staphylococcal intoxi.. | <5 | <0.01 |
| A05.1 Botulism                          | <5 | <0.01 |
| A05.2 Foodborne Clostridium perfringe.. | <5 | <0.01 |
| A05.8 Other specified bacterial foodb.. | <5 | <0.01 |
| A06.2 Amoebic nondysenteric colitis     | <5 | <0.01 |
| A06.4 Amoebic liver abscess             | <5 | <0.01 |
| A06.5 Amoebic lung abscess              | <5 | <0.01 |
| A06.8 Amoebic infection of other sites  | <5 | <0.01 |
| A07.0 Balantidiasis                     | <5 | <0.01 |
| A07.1 Giardiasis [lambliasis]           | <5 | <0.01 |
| A07.2 Cryptosporidiosis                 | <5 | <0.01 |
| A07.3 Isosporiasis                      | <5 | <0.01 |
| A07.9 Protozoal intestinal disease, u.. | <5 | <0.01 |
| A20.9 Plague, unspecified               | <5 | <0.01 |
| A21.1 Oculoglandular tularaemia         | <5 | <0.01 |
| A21.2 Pulmonary tularaemia              | <5 | <0.01 |

|                                         |    |       |
|-----------------------------------------|----|-------|
| A21.7 Generalized tularaemia            | <5 | <0.01 |
| A21.8 Other forms of tularaemia         | <5 | <0.01 |
| A22.0 Cutaneous anthrax                 | <5 | <0.01 |
| A22.2 Gastrointestinal anthrax          | <5 | <0.01 |
| A23.9 Brucellosis, unspecified          | <5 | <0.01 |
| A24.0 Glanders                          | <5 | <0.01 |
| A26.0 Cutaneous erysipeloid             | <5 | <0.01 |
| A26.9 Erysipeloid, unspecified          | <5 | <0.01 |
| A27 Leptospirosis                       | <5 | <0.01 |
| A27.0 Leptospirosis icterohaemorrhagica | <5 | <0.01 |
| A27.8 Other forms of leptospirosis      | <5 | <0.01 |
| A27.9 Leptospirosis, unspecified        | <5 | <0.01 |
| A28.2 Extraintestinal yersiniosis       | <5 | <0.01 |
| A28.8 Other specified zoonotic bacter.. | <5 | <0.01 |
| A28.9 Zoonotic bacterial disease, uns.. | <5 | <0.01 |
| A32.9 Listeriosis, unspecified          | <5 | <0.01 |
| A35 Other tetanus                       | <5 | <0.01 |
| A36 Diphtheria                          | <5 | <0.01 |
| A37.0 Whooping cough due to Bordetell.. | <5 | <0.01 |
| A37.9 Whooping cough, unspecified       | <5 | <0.01 |
| A39 Meningococcal infection             | <5 | <0.01 |
| A39.8 Other meningococcal infections    | <5 | <0.01 |
| A39.9 Meningococcal infection, unspec.. | <5 | <0.01 |
| A40 Streptococcal sepsis                | <5 | <0.01 |
| A40.2 Sepsis due to streptococcus, gr.. | <5 | <0.01 |
| A41 Other sepsis                        | <5 | <0.01 |
| A41.3 Sepsis due to Haemophilus influ.. | <5 | <0.01 |
| A49.2 Haemophilus influenzae infectio.. | <5 | <0.01 |
| A49.3 Mycoplasma infection, unspecifi.. | <5 | <0.01 |
| A54 Gonococcal infection                | <5 | <0.01 |
| A54.3 Gonococcal infection of eye       | <5 | <0.01 |
| A54.4 Gonococcal infection of musculo.. | <5 | <0.01 |
| A54.8 Other gonococcal infections       | <5 | <0.01 |
| A55 Chlamydial lymphogranuloma (vener.. | <5 | <0.01 |
| A56.2 Chlamydial infection of genitou.. | <5 | <0.01 |
| A56.3 Chlamydial infection of anus an.. | <5 | <0.01 |
| A56.8 Sexually transmitted chlamydial.. | <5 | <0.01 |
| A68 Relapsing fevers                    | <5 | <0.01 |
| A69.0 Necrotizing ulcerative stomatitis | <5 | <0.01 |
| A69.1 Other Vincent infections          | <5 | <0.01 |
| A69.9 Spirochaetal infection, unspeci.. | <5 | <0.01 |
| A70 Chlamydia psittaci infection        | <5 | <0.01 |
| A71 Trachoma                            | <5 | <0.01 |
| A75.0 Epidemic louse-borne typhus fev.. | <5 | <0.01 |
| A75.9 Typhus fever, unspecified         | <5 | <0.01 |
| A77.1 Spotted fever due to Rickettsia.. | <5 | <0.01 |
| A78 Q fever                             | <5 | <0.01 |
| A79.9 Rickettsiosis, unspecified        | <5 | <0.01 |

|                                         |    |       |
|-----------------------------------------|----|-------|
| A80.1 Acute paralytic poliomyelitis, .. | <5 | <0.01 |
| A80.3 Acute paralytic poliomyelitis, .. | <5 | <0.01 |
| A83.0 Japanese encephalitis             | <5 | <0.01 |
| A83.6 Rocio virus disease               | <5 | <0.01 |
| A83.8 Other mosquito-borne viral ence.. | <5 | <0.01 |
| A84 Tick-borne viral encephalitis       | <5 | <0.01 |
| A84.1 Central European tick-borne enc.. | <5 | <0.01 |
| A85.0 Enteroviral encephalitis          | <5 | <0.01 |
| A85.1 Adenoviral encephalitis           | <5 | <0.01 |
| A85.2 Arthropod-borne viral encephali.. | <5 | <0.01 |
| A85.8 Other specified viral encephali.. | <5 | <0.01 |
| A87.1 Adenoviral meningitis             | <5 | <0.01 |
| A87.2 Lymphocytic choriomeningitis      | <5 | <0.01 |
| A88.1 Epidemic vertigo                  | <5 | <0.01 |
| A92.8 Other specified mosquito-borne .. | <5 | <0.01 |
| A96.0 Junin haemorrhagic fever          | <5 | <0.01 |
| A98.0 Crimean-Congo haemorrhagic fever  | <5 | <0.01 |
| A98.1 Omsk haemorrhagic fever           | <5 | <0.01 |
| A98.3 Marburg virus disease             | <5 | <0.01 |
| A98.4 Ebola virus disease               | <5 | <0.01 |
| A99 Unspecified viral haemorrhagic fe.. | <5 | <0.01 |
| B05 Measles                             | <5 | <0.01 |
| B05.3 Measles complicated by otitis m.. | <5 | <0.01 |
| B06.8 Rubella with other complications  | <5 | <0.01 |
| B08.0 Other orthopoxvirus infections    | <5 | <0.01 |
| B08.4 Enteroviral vesicular stomatiti.. | <5 | <0.01 |
| B15.0 Hepatitis A with hepatic coma     | <5 | <0.01 |
| B16.1 Acute hepatitis B with delta-ag.. | <5 | <0.01 |
| B17.2 Acute hepatitis E                 | <5 | <0.01 |
| B17.8 Other specified acute viral hep.. | <5 | <0.01 |
| B26 Mumps                               | <5 | <0.01 |
| B26.1 Mumps meningitis                  | <5 | <0.01 |
| B26.8 Mumps with other complications    | <5 | <0.01 |
| B27.8 Other infectious mononucleosis    | <5 | <0.01 |
| B30.8 Other viral conjunctivitis        | <5 | <0.01 |
| B33.0 Epidemic myalgia                  | <5 | <0.01 |
| B34.3 Parvovirus infection, unspecifi.. | <5 | <0.01 |
| B38 Coccidioidomycosis                  | <5 | <0.01 |
| B38.0 Acute pulmonary coccidioidomyco.. | <5 | <0.01 |
| B39.4 Histoplasmosis capsulati, unspe.. | <5 | <0.01 |
| B49 Unspecified mycosis                 | <5 | <0.01 |
| B50.0 Plasmodium falciparum malaria w.. | <5 | <0.01 |
| B50.8 Other severe and complicated Pl.. | <5 | <0.01 |
| B52.0 Plasmodium malariae malaria wit.. | <5 | <0.01 |
| B52.9 Plasmodium malariae malaria wit.. | <5 | <0.01 |
| B60.8 Other specified protozoal disea.. | <5 | <0.01 |
| B66 Other fluke infections              | <5 | <0.01 |
| B81.0 Anisakiasis                       | <5 | <0.01 |

|                                         |    |       |
|-----------------------------------------|----|-------|
| B81.4 Mixed intestinal helminthiases    | <5 | <0.01 |
| B82.9 Intestinal parasitism, unspecif.. | <5 | <0.01 |
| B83.0 Visceral larva migrans            | <5 | <0.01 |
| B83.9 Helminthiasis, unspecified        | <5 | <0.01 |
| B87.1 Wound myiasis                     | <5 | <0.01 |
| B87.9 Myiasis, unspecified              | <5 | <0.01 |
| B95.0 Streptococcus, group A, as the .. | <5 | <0.01 |
| B95.1 Streptococcus, group B, as the .. | <5 | <0.01 |
| B95.3 Streptococcus pneumoniae as the.. | <5 | <0.01 |
| B95.4 Other streptococcus as the caus.. | <5 | <0.01 |
| B95.5 Unspecified streptococcus as th.. | <5 | <0.01 |
| B95.6 Staphylococcus aureus as the ca.. | <5 | <0.01 |
| B95.7 Other staphylococcus as the cau.. | <5 | <0.01 |
| B96.1 Klebsiella pneumoniae [K. pneum.. | <5 | <0.01 |
| B96.2 Escherichia coli [E. coli] as t.. | <5 | <0.01 |
| B96.3 Haemophilus influenzae [H. infl.. | <5 | <0.01 |
| B96.5 Pseudomonas (aeruginosa) as the.. | <5 | <0.01 |
| B97.4 Respiratory syncytial virus as .. | <5 | <0.01 |
| D73.3 Abscess of spleen                 | <5 | <0.01 |
| G00.2 Streptococcal meningitis          | <5 | <0.01 |
| G00.3 Staphylococcal meningitis         | <5 | <0.01 |
| G03.0 Nonpyogenic meningitis            | <5 | <0.01 |
| G03.1 Chronic meningitis                | <5 | <0.01 |
| G04.2 Bacterial meningoencephalitis a.. | <5 | <0.01 |
| G05.0 Encephalitis, myelitis and ence.. | <5 | <0.01 |
| G05.2 Encephalitis, myelitis and ence.. | <5 | <0.01 |
| G06 Intracranial and intraspinal absc.. | <5 | <0.01 |
| G06.2 Extradural and subdural abscess.. | <5 | <0.01 |
| H01.0 Blepharitis                       | <5 | <0.01 |
| H19.0 Scleritis and episcleritis in d.. | <5 | <0.01 |
| H22.0 Iridocyclitis in infectious and.. | <5 | <0.01 |
| H32.0 Chorioretinal inflammation in i.. | <5 | <0.01 |
| H60.2 Malignant otitis externa          | <5 | <0.01 |
| I32.0 Pericarditis in bacterial disea.. | <5 | <0.01 |
| I41.0 Myocarditis in bacterial diseas.. | <5 | <0.01 |
| I41.1 Myocarditis in viral diseases c.. | <5 | <0.01 |
| I52.0 Other heart disorders in bacter.. | <5 | <0.01 |
| J02.8 Acute pharyngitis due to other .. | <5 | <0.01 |
| J03 Acute tonsillitis                   | <5 | <0.01 |
| J10 Influenza due to other identified.. | <5 | <0.01 |
| J11 Influenza, virus not identified     | <5 | <0.01 |
| J12.0 Adenoviral pneumonia              | <5 | <0.01 |
| J12.2 Parainfluenza virus pneumonia     | <5 | <0.01 |
| J12.8 Other viral pneumonia             | <5 | <0.01 |
| J15.0 Pneumonia due to Klebsiella pne.. | <5 | <0.01 |
| J15.1 Pneumonia due to Pseudomonas      | <5 | <0.01 |
| J15.3 Pneumonia due to streptococcus,.. | <5 | <0.01 |
| J15.4 Pneumonia due to other streptoc.. | <5 | <0.01 |

|                                         |               |               |
|-----------------------------------------|---------------|---------------|
| J15.5 Pneumonia due to Escherichia coli | <5            | <0.01         |
| J15.6 Pneumonia due to other aerobic .. | <5            | <0.01         |
| J17.0 Pneumonia in bacterial diseases.. | <5            | <0.01         |
| J17.1 Pneumonia in viral diseases cla.. | <5            | <0.01         |
| J17.2 Pneumonia in mycoses              | <5            | <0.01         |
| J18.2 Hypostatic pneumonia, unspecified | <5            | <0.01         |
| J20 Acute bronchitis                    | <5            | <0.01         |
| J20.2 Acute bronchitis due to strepto.. | <5            | <0.01         |
| J20.4 Acute bronchitis due to parainf.. | <5            | <0.01         |
| J20.6 Acute bronchitis due to rhinovi.. | <5            | <0.01         |
| J21.8 Acute bronchiolitis due to othe.. | <5            | <0.01         |
| K61.4 Intrasphincteric abscess          | <5            | <0.01         |
| K67.8 Other disorders of peritoneum i.. | <5            | <0.01         |
| L00 Staphylococcal scalded skin syndr.. | <5            | <0.01         |
| L04.1 Acute lymphadenitis of trunk      | <5            | <0.01         |
| L04.3 Acute lymphadenitis of lower limb | <5            | <0.01         |
| L08.1 Erythrasma                        | <5            | <0.01         |
| M00.8 Arthritis and polyarthritis due.. | <5            | <0.01         |
| M01.0 Meningococcal arthritis           | <5            | <0.01         |
| M01.3 Arthritis in other bacterial di.. | <5            | <0.01         |
| M46.5 Other infective spondylopathies   | <5            | <0.01         |
| M49.1 Brucella spondylitis              | <5            | <0.01         |
| M49.3 Spondylopathy in other infectio.. | <5            | <0.01         |
| M63.0 Myositis in bacterial diseases .. | <5            | <0.01         |
| M72.6 Necrotizing fasciitis             | <5            | <0.01         |
| M86.3 Chronic multifocal osteomyelitis  | <5            | <0.01         |
| M86.4 Chronic osteomyelitis with drai.. | <5            | <0.01         |
| M86.8 Other osteomyelitis               | <5            | <0.01         |
| N16.0 Renal tubulo-interstitial disor.. | <5            | <0.01         |
| O23.2 Infections of urethra in pregna.. | <5            | <0.01         |
| O23.3 Infections of other parts of ur.. | <5            | <0.01         |
| O98.6 Protozoal diseases complicating.. | <5            | <0.01         |
| P36.9 Bacterial sepsis of newborn, un.. | <5            | <0.01         |
| P37.9 Congenital infectious and paras.. | <5            | <0.01         |
| P39.0 Neonatal infective mastitis       | <5            | <0.01         |
| P39.1 Neonatal conjunctivitis and dac.. | <5            | <0.01         |
| P39.9 Infection specific to the perin.. | <5            | <0.01         |
| R57.2 Septic shock                      | <5            | <0.01         |
| <b>Total</b>                            | <b>73 563</b> | <b>100.00</b> |

**eTable 24. Distribution of chronic infections in primary analysis (Finnish multicohort sample)**

| ICD-10 code and description             | N    | %     |
|-----------------------------------------|------|-------|
| A63.0 Anogenital (venereal) warts       | 1061 | 14.69 |
| B27.0 Gammaherpesviral mononucleosis    | 547  | 7.57  |
| K05.3 Chronic periodontitis             | 469  | 6.49  |
| B27.9 Infectious mononucleosis, unspe.. | 432  | 5.98  |
| B01.9 Varicella without complication    | 347  | 4.80  |

|                                         |     |      |
|-----------------------------------------|-----|------|
| B18.2 Chronic viral hepatitis C         | 338 | 4.68 |
| K04.5 Chronic apical periodontitis      | 303 | 4.19 |
| A60.0 Herpesviral infection of genita.. | 290 | 4.01 |
| K02.1 Caries of dentine                 | 267 | 3.70 |
| B02.9 Zoster without complication       | 191 | 2.64 |
| B86 Scabies                             | 160 | 2.21 |
| A16.2 Tuberculosis of lung, without m.. | 151 | 2.09 |
| B35 Dermatophytosis                     | 133 | 1.84 |
| K02 Dental caries                       | 126 | 1.74 |
| B00.1 Herpesviral vesicular dermatitis  | 121 | 1.67 |
| A15.0 Tuberculosis of lung, confirmed.. | 103 | 1.43 |
| B00.2 Herpesviral gingivostomatitis a.. | 87  | 1.20 |
| B08.2 Exanthema subitum [sixth disease] | 86  | 1.19 |
| K04.6 Periapical abscess with sinus     | 84  | 1.16 |
| B37 Candidiasis                         | 74  | 1.02 |
| B00.0 Eczema herpeticum                 | 62  | 0.86 |
| B02.8 Zoster with other complications   | 62  | 0.86 |
| K02.9 Dental caries, unspecified        | 57  | 0.79 |
| B97.7 Papillomavirus as the cause of .. | 54  | 0.75 |
| A18.2 Tuberculous peripheral lymphade.. | 52  | 0.72 |
| M86.6 Other chronic osteomyelitis       | 51  | 0.71 |
| B01.1 Varicella encephalitis            | 48  | 0.66 |
| B85 Pediculosis and phthiriasis         | 45  | 0.62 |
| B25.8 Other cytomegaloviral diseases    | 43  | 0.60 |
| B00.4 Herpesviral encephalitis          | 39  | 0.54 |
| B00.5 Herpesviral ocular disease        | 39  | 0.54 |
| B01.8 Varicella with other complicati.. | 39  | 0.54 |
| B18.1 Chronic viral hepatitis B witho.. | 38  | 0.53 |
| B25.9 Cytomegaloviral disease, unspec.. | 38  | 0.53 |
| A16.5 Tuberculous pleurisy, without m.. | 35  | 0.48 |
| B02.3 Zoster ocular disease             | 35  | 0.48 |
| B37.3 Candidiasis of vulva and vagina   | 32  | 0.44 |
| J17.3 Pneumonia in parasitic diseases   | 31  | 0.43 |
| B37.0 Candidal stomatitis               | 28  | 0.39 |
| B37.7 Candidal sepsis                   | 28  | 0.39 |
| B37.8 Candidiasis of other sites        | 28  | 0.39 |
| B35.3 Tinea pedis                       | 26  | 0.36 |
| A15.1 Tuberculosis of lung, confirmed.. | 25  | 0.35 |
| B00.8 Other forms of herpesviral infe.. | 24  | 0.33 |
| B01 Varicella [chickenpox]              | 24  | 0.33 |
| B23.1 HIV disease resulting in (persi.. | 24  | 0.33 |
| B24 Unspecified human immunodeficienc.. | 23  | 0.32 |
| A18.0 Tuberculosis of bones and joints  | 22  | 0.30 |
| A31.0 Pulmonary mycobacterial infection | 21  | 0.29 |
| B27.1 Cytomegaloviral mononucleosis     | 21  | 0.29 |
| B00.3 Herpesviral meningitis            | 19  | 0.26 |
| B58.9 Toxoplasmosis, unspecified        | 19  | 0.26 |
| M86.8 Other osteomyelitis               | 19  | 0.26 |



|                                                         |    |      |
|---------------------------------------------------------|----|------|
| A52.1 Symptomatic neurosyphilis                         | 17 | 0.24 |
| M86.4 Chronic osteomyelitis with drain                  | 17 | 0.24 |
| A51.3 Secondary syphilis of skin and mucous membranes   | 16 | 0.22 |
| A51.0 Primary genital syphilis                          | 15 | 0.21 |
| B00.9 Herpesviral infection, unspecified                | 15 | 0.21 |
| B35.1 Tinea unguium                                     | 15 | 0.21 |
| B70.0 Diphyllorhynchiasis                               | 15 | 0.21 |
| B01.2 Varicella pneumonia                               | 14 | 0.19 |
| B00.7 Disseminated herpesviral disease                  | 13 | 0.18 |
| B25.1 Cytomegaloviral hepatitis                         | 13 | 0.18 |
| B58.0 Toxoplasma oculopathy                             | 13 | 0.18 |
| B80 Enterobiasis                                        | 13 | 0.18 |
| K02.8 Other dental caries                               | 13 | 0.18 |
| A15.6 Tuberculous pleurisy, confirmed                   | 12 | 0.17 |
| A18.1 Tuberculosis of genitourinary system              | 12 | 0.17 |
| L70.1 Acne conglobata                                   | 12 | 0.17 |
| A16.0 Tuberculosis of lung, bacterial                   | 11 | 0.15 |
| B02.0 Zoster encephalitis                               | 11 | 0.15 |
| B02.1 Zoster meningitis                                 | 10 | 0.14 |
| B37.4 Candidiasis of other urogenital system            | 10 | 0.14 |
| B53.0 Plasmodium ovale malaria                          | 10 | 0.14 |
| Z21 Asymptomatic human immunodeficiency virus infection | 10 | 0.14 |
| A16.9 Respiratory tuberculosis unspecified              | 9  | 0.12 |
| B18.9 Chronic viral hepatitis, unspecified              | 9  | 0.12 |
| A18.3 Tuberculosis of intestines, peritoneal            | 8  | 0.11 |
| A60.9 Anogenital herpesviral infection                  | 8  | 0.11 |
| B02.2 Zoster with other nervous system involvement      | 8  | 0.11 |
| B36 Other superficial mycoses                           | 8  | 0.11 |
| B51.9 Plasmodium vivax malaria without complications    | 8  | 0.11 |
| A42.9 Actinomycosis, unspecified                        | 7  | 0.10 |
| B25.0 Cytomegaloviral pneumonitis                       | 7  | 0.10 |
| B44.1 Other pulmonary aspergillosis                     | 7  | 0.10 |
| B67 Echinococcosis                                      | 7  | 0.10 |
| B77.9 Ascariasis, unspecified                           | 7  | 0.10 |
| H19.1 Herpesviral keratitis and keratoconjunctivitis    | 7  | 0.10 |
| M86.2 Subacute osteomyelitis                            | 7  | 0.10 |
| A15.2 Tuberculosis of lung, confirmed                   | 6  | 0.08 |
| A18.8 Tuberculosis of other specified sites             | 6  | 0.08 |
| A31.9 Mycobacterial infection, unspecified              | 6  | 0.08 |
| B01.0 Varicella meningitis                              | 6  | 0.08 |
| B02.7 Disseminated zoster                               | 6  | 0.08 |
| B35.6 Tinea cruris                                      | 6  | 0.08 |
| B74 Filariasis                                          | 6  | 0.08 |
| A15.4 Tuberculosis of intrathoracic lymph nodes         | 5  | 0.07 |
| A15.7 Primary respiratory tuberculosis                  | 5  | 0.07 |
| A15.9 Respiratory tuberculosis unspecified              | 5  | 0.07 |
| A16.1 Tuberculosis of lung, bacterial                   | 5  | 0.07 |
| A18.4 Tuberculosis of skin and subcutaneous tissue      | 5  | 0.07 |

|                                         |    |       |
|-----------------------------------------|----|-------|
| A30 Leprosy [Hansen disease]            | 5  | 0.07  |
| A31 Infection due to other mycobacteria | 5  | 0.07  |
| A42.8 Other forms of actinomycosis      | 5  | 0.07  |
| A51.5 Early syphilis, latent            | 5  | 0.07  |
| A51.9 Early syphilis, unspecified       | 5  | 0.07  |
| B44.0 Invasive pulmonary aspergillosis  | 5  | 0.07  |
| B44.9 Aspergillosis, unspecified        | 5  | 0.07  |
| K02.0 Caries limited to enamel          | 5  | 0.07  |
| O98.0 Tuberculosis complicating pregn.. | 5  | 0.07  |
| A15.3 Tuberculosis of lung, confirmed.. | <5 | <0.07 |
| A15.5 Tuberculosis of larynx, trachea.. | <5 | <0.07 |
| A15.8 Other respiratory tuberculosis,.. | <5 | <0.07 |
| A16.3 Tuberculosis of intrathoracic l.. | <5 | <0.07 |
| A16.4 Tuberculosis of larynx, trachea.. | <5 | <0.07 |
| A16.7 Primary respiratory tuberculosi.. | <5 | <0.07 |
| A16.8 Other respiratory tuberculosis,.. | <5 | <0.07 |
| A17.0 Tuberculous meningitis            | <5 | <0.07 |
| A17.8 Other tuberculosis of nervous s.. | <5 | <0.07 |
| A17.9 Tuberculosis of nervous system,.. | <5 | <0.07 |
| A19.0 Acute miliary tuberculosis of a.. | <5 | <0.07 |
| A19.2 Acute miliary tuberculosis, uns.. | <5 | <0.07 |
| A19.9 Miliary tuberculosis, unspecified | <5 | <0.07 |
| A31.1 Cutaneous mycobacterial infection | <5 | <0.07 |
| A31.8 Other mycobacterial infections    | <5 | <0.07 |
| A42 Actinomycosis                       | <5 | <0.07 |
| A42.0 Pulmonary actinomycosis           | <5 | <0.07 |
| A42.1 Abdominal actinomycosis           | <5 | <0.07 |
| A42.2 Cervicofacial actinomycosis       | <5 | <0.07 |
| A42.7 Actinomycotic sepsis              | <5 | <0.07 |
| A44.1 Cutaneous and mucocutaneous bar.. | <5 | <0.07 |
| A50 Congenital syphilis                 | <5 | <0.07 |
| A50.5 Other late congenital syphilis,.. | <5 | <0.07 |
| A50.9 Congenital syphilis, unspecified  | <5 | <0.07 |
| A51.1 Primary anal syphilis             | <5 | <0.07 |
| A51.2 Primary syphilis of other sites   | <5 | <0.07 |
| A51.4 Other secondary syphilis          | <5 | <0.07 |
| A52.0 Cardiovascular syphilis           | <5 | <0.07 |
| A52.7 Other symptomatic late syphilis   | <5 | <0.07 |
| A52.8 Late syphilis, latent             | <5 | <0.07 |
| A53 Other and unspecified syphilis      | <5 | <0.07 |
| A53.9 Syphilis, unspecified             | <5 | <0.07 |
| A58 Granuloma inguinale                 | <5 | <0.07 |
| A60.1 Herpesviral infection of perian.. | <5 | <0.07 |
| A66.1 Multiple papillomata and wet cr.. | <5 | <0.07 |
| A66.3 Hyperkeratosis of yaws            | <5 | <0.07 |
| A67 Pinta [carate]                      | <5 | <0.07 |
| A67.1 Intermediate lesions of pinta     | <5 | <0.07 |
| A81.2 Progressive multifocal leukoenc.. | <5 | <0.07 |

|                                         |    |       |
|-----------------------------------------|----|-------|
| B02 Zoster [herpes zoster]              | <5 | <0.07 |
| B18.0 Chronic viral hepatitis B with .. | <5 | <0.07 |
| B18.8 Other chronic viral hepatitis     | <5 | <0.07 |
| B20.0 HIV disease resulting in mycoba.. | <5 | <0.07 |
| B20.6 HIV disease resulting in Pneumo.. | <5 | <0.07 |
| B21.2 HIV disease resulting in other .. | <5 | <0.07 |
| B21.9 HIV disease resulting in unspec.. | <5 | <0.07 |
| B22.0 HIV disease resulting in enceph.. | <5 | <0.07 |
| B23.0 Acute HIV infection syndrome      | <5 | <0.07 |
| B23.8 HIV disease resulting in other .. | <5 | <0.07 |
| B35.0 Tinea barbae and tinea capitis    | <5 | <0.07 |
| B35.2 Tinea manuum                      | <5 | <0.07 |
| B35.4 Tinea corporis                    | <5 | <0.07 |
| B35.9 Dermatophytosis, unspecified      | <5 | <0.07 |
| B36.0 Pityriasis versicolor             | <5 | <0.07 |
| B36.8 Other specified superficial myc.. | <5 | <0.07 |
| B36.9 Superficial mycosis, unspecified  | <5 | <0.07 |
| B37.1 Pulmonary candidiasis             | <5 | <0.07 |
| B37.2 Candidiasis of skin and nail      | <5 | <0.07 |
| B37.9 Candidiasis, unspecified          | <5 | <0.07 |
| B38.1 Chronic pulmonary coccidioidomy.. | <5 | <0.07 |
| B39.1 Chronic pulmonary histoplasmosi.. | <5 | <0.07 |
| B39.3 Disseminated histoplasmosis cap.. | <5 | <0.07 |
| B41.0 Pulmonary paracoccidioidomycosis  | <5 | <0.07 |
| B43.9 Chromomycosis, unspecified        | <5 | <0.07 |
| B44.8 Other forms of aspergillosis      | <5 | <0.07 |
| B47.9 Mycetoma, unspecified             | <5 | <0.07 |
| B48.1 Rhinosporidiosis                  | <5 | <0.07 |
| B51 Plasmodium vivax malaria            | <5 | <0.07 |
| B51.0 Plasmodium vivax malaria with r.. | <5 | <0.07 |
| B55.2 Mucocutaneous leishmaniasis       | <5 | <0.07 |
| B58.8 Toxoplasmosis with other organ .. | <5 | <0.07 |
| B65.0 Schistosomiasis due to Schistos.. | <5 | <0.07 |
| B65.1 Schistosomiasis due to Schistos.. | <5 | <0.07 |
| B65.2 Schistosomiasis due to Schistos.. | <5 | <0.07 |
| B65.9 Schistosomiasis, unspecified      | <5 | <0.07 |
| B67.3 Echinococcus granulosus infecti.. | <5 | <0.07 |
| B67.8 Echinococcosis, unspecified, of.. | <5 | <0.07 |
| B67.9 Echinococcosis, other and unspe.. | <5 | <0.07 |
| B68.0 Taenia solium taeniasis           | <5 | <0.07 |
| B68.1 Taenia saginata taeniasis         | <5 | <0.07 |
| B68.9 Taeniasis, unspecified            | <5 | <0.07 |
| B69.0 Cysticercosis of central nervou.. | <5 | <0.07 |
| B71.0 Hymenolepiasis                    | <5 | <0.07 |
| B74.0 Filariasis due to Wuchereria ba.. | <5 | <0.07 |
| B75 Trichinellosis                      | <5 | <0.07 |
| B76 Hookworm diseases                   | <5 | <0.07 |
| B76.0 Ancylostomiasis                   | <5 | <0.07 |

|                                         |              |               |
|-----------------------------------------|--------------|---------------|
| B77.8 Ascariasis with other complicat.. | <5           | <0.07         |
| B78.0 Intestinal strongyloidiasis       | <5           | <0.07         |
| B78.9 Strongyloidiasis, unspecified     | <5           | <0.07         |
| B79 Trichuriasis                        | <5           | <0.07         |
| B81.2 Trichostrongyliasis               | <5           | <0.07         |
| B85.0 Pediculosis due to Pediculus hu.. | <5           | <0.07         |
| B85.1 Pediculosis due to Pediculus hu.. | <5           | <0.07         |
| B85.3 Phthiriasis                       | <5           | <0.07         |
| G04.1 Tropical spastic paraplegia       | <5           | <0.07         |
| H62.2 Otitis externa in mycoses         | <5           | <0.07         |
| K02.2 Caries of cementum                | <5           | <0.07         |
| K02.3 Arrested dental caries            | <5           | <0.07         |
| K23.0 Tuberculous oesophagitis          | <5           | <0.07         |
| K67.3 Tuberculous peritonitis           | <5           | <0.07         |
| M01.1 Tuberculous arthritis             | <5           | <0.07         |
| M49.0 Tuberculosis of spine             | <5           | <0.07         |
| M86.3 Chronic multifocal osteomyelitis  | <5           | <0.07         |
| O98.1 Syphilis complicating pregnancy.. | <5           | <0.07         |
| P37.1 Congenital toxoplasmosis          | <5           | <0.07         |
| <b>Total</b>                            | <b>7 225</b> | <b>100.00</b> |

**eTable 25. Distribution of infections predisposed towards entering the central nervous system in primary analysis (Finnish multicohort sample)**

| ICD-10 code and description             | N   | %    |
|-----------------------------------------|-----|------|
| B27.0 Gammaherpesviral mononucleosis    | 545 | 6.83 |
| B27.9 Infectious mononucleosis, unspe.. | 425 | 5.33 |
| J13 Pneumonia due to Streptococcus pn.. | 402 | 5.04 |
| B01.9 Varicella without complication    | 343 | 4.3  |
| B06.9 Rubella without complication      | 339 | 4.25 |
| A69.2 Lyme disease                      | 312 | 3.91 |
| B18.2 Chronic viral hepatitis C         | 287 | 3.6  |
| A60.0 Herpesviral infection of genita.. | 281 | 3.52 |
| A87.9 Viral meningitis, unspecified     | 272 | 3.41 |
| K12.2 Cellulitis and abscess of mouth   | 252 | 3.16 |
| A40.3 Sepsis due to Streptococcus pne.. | 195 | 2.45 |
| B02.9 Zoster without complication       | 195 | 2.45 |
| B19.9 Unspecified viral hepatitis wit.. | 177 | 2.22 |
| A89 Unspecified viral infection of ce.. | 165 | 2.07 |
| A16.2 Tuberculosis of lung, without m.. | 152 | 1.91 |
| A86 Unspecified viral encephalitis      | 145 | 1.82 |
| G00.9 Bacterial meningitis, unspecified | 144 | 1.81 |
| A87.0 Enteroviral meningitis            | 143 | 1.79 |
| I33.0 Acute and subacute infective en.. | 127 | 1.59 |
| B00.1 Herpesviral vesicular dermatitis  | 114 | 1.43 |
| A15.0 Tuberculosis of lung, confirmed.. | 102 | 1.28 |
| B05.9 Measles without complication      | 98  | 1.23 |
| G03.9 Meningitis, unspecified           | 98  | 1.23 |

|                                         |    |      |
|-----------------------------------------|----|------|
| B08.2 Exanthema subitum [sixth disease] | 85 | 1.07 |
| B00.2 Herpesviral gingivostomatitis a.. | 84 | 1.05 |
| B37 Candidiasis                         | 73 | 0.92 |
| B26.2 Mumps encephalitis                | 69 | 0.87 |
| B00.0 Eczema herpeticum                 | 61 | 0.76 |
| B02.8 Zoster with other complications   | 59 | 0.74 |
| A18.2 Tuberculous peripheral lymphade.. | 52 | 0.65 |
| H05.0 Acute inflammation of orbit       | 50 | 0.63 |
| B25.8 Other cytomegaloviral diseases    | 47 | 0.59 |
| B15.9 Hepatitis A without hepatic coma  | 45 | 0.56 |
| G00.8 Other bacterial meningitis        | 44 | 0.55 |
| H70.0 Acute mastoiditis                 | 43 | 0.54 |
| B01.1 Varicella encephalitis            | 41 | 0.51 |
| B16.9 Acute hepatitis B without delta.. | 41 | 0.51 |
| B01.8 Varicella with other complicati.. | 40 | 0.5  |
| G05.1 Encephalitis, myelitis and ence.. | 38 | 0.48 |
| B00.5 Herpesviral ocular disease        | 37 | 0.46 |
| B25.9 Cytomegaloviral disease, unspec.. | 36 | 0.45 |
| A16.5 Tuberculous pleurisy, without m.. | 35 | 0.44 |
| B18.1 Chronic viral hepatitis B witho.. | 34 | 0.43 |
| A39.0 Meningococcal meningitis          | 33 | 0.41 |
| B37.3 Candidiasis of vulva and vagina   | 31 | 0.39 |
| G00.0 Haemophilus meningitis            | 31 | 0.39 |
| G06.1 Intraspinal abscess and granuloma | 31 | 0.39 |
| B37.8 Candidiasis of other sites        | 30 | 0.38 |
| G06.0 Intracranial abscess and granul.. | 30 | 0.38 |
| B02.3 Zoster ocular disease             | 28 | 0.35 |
| B37.7 Candidal sepsis                   | 28 | 0.35 |
| B17.1 Acute hepatitis C                 | 27 | 0.34 |
| B23.1 HIV disease resulting in (persi.. | 26 | 0.33 |
| B34.0 Adenovirus infection, unspecifi.. | 26 | 0.33 |
| G02.0 Meningitis in viral diseases cl.. | 26 | 0.33 |
| A15.1 Tuberculosis of lung, confirmed.. | 25 | 0.31 |
| B37.0 Candidal stomatitis               | 25 | 0.31 |
| G01 Meningitis in bacterial diseases .. | 25 | 0.31 |
| B01 Varicella [chickenpox]              | 24 | 0.3  |
| B24 Unspecified human immunodeficienc.. | 24 | 0.3  |
| B26.9 Mumps without complication        | 24 | 0.3  |
| B50.9 Plasmodium falciparum malaria, .. | 23 | 0.29 |
| G00.1 Pneumococcal meningitis           | 23 | 0.29 |
| A18.0 Tuberculosis of bones and joints  | 22 | 0.28 |
| B00.8 Other forms of herpesviral infe.. | 22 | 0.28 |
| A88.8 Other specified viral infection.. | 21 | 0.26 |
| B27.1 Cytomegaloviral mononucleosis     | 21 | 0.26 |
| O98.4 Viral hepatitis complicating pr.. | 21 | 0.26 |
| B97.0 Adenovirus as the cause of dise.. | 20 | 0.25 |
| B58.9 Toxoplasmosis, unspecified        | 19 | 0.24 |
| J14 Pneumonia due to Haemophilus infl.. | 18 | 0.23 |

|                                         |    |      |
|-----------------------------------------|----|------|
| A51.0 Primary genital syphilis          | 16 | 0.2  |
| A52.1 Symptomatic neurosyphilis         | 16 | 0.2  |
| A51.3 Secondary syphilis of skin and .. | 15 | 0.19 |
| B70.0 Diphyllbothriasis                 | 15 | 0.19 |
| A02.2 Localized salmonella infections   | 14 | 0.18 |
| A87.8 Other viral meningitis            | 14 | 0.18 |
| B00.9 Herpesviral infection, unspecif.. | 14 | 0.18 |
| B01.2 Varicella pneumonia               | 14 | 0.18 |
| B06 Rubella [German measles]            | 14 | 0.18 |
| A06.9 Amoebiasis, unspecified           | 13 | 0.16 |
| A90 Dengue fever [classical dengue]     | 13 | 0.16 |
| B25.1 Cytomegaloviral hepatitis         | 13 | 0.16 |
| B34.1 Enterovirus infection, unspecif.. | 13 | 0.16 |
| J20.1 Acute bronchitis due to Haemoph.. | 13 | 0.16 |
| A15.6 Tuberculous pleurisy, confirmed.. | 12 | 0.15 |
| A18.1 Tuberculosis of genitourinary s.. | 12 | 0.15 |
| A39.2 Acute meningococcaemia            | 12 | 0.15 |
| B26.0 Mumps orchitis                    | 12 | 0.15 |
| B54 Unspecified malaria                 | 12 | 0.15 |
| A16.0 Tuberculosis of lung, bacteriol.. | 11 | 0.14 |
| A32.7 Listerial sepsis                  | 11 | 0.14 |
| B00.4 Herpesviral encephalitis          | 11 | 0.14 |
| B00.7 Disseminated herpesviral disease  | 11 | 0.14 |
| B02.0 Zoster encephalitis               | 11 | 0.14 |
| B58.0 Toxoplasma oculopathy             | 11 | 0.14 |
| A08.2 Adenoviral enteritis              | 10 | 0.13 |
| A84.8 Other tick-borne viral encephal.. | 10 | 0.13 |
| B37.4 Candidiasis of other urogenital.. | 10 | 0.13 |
| Z21 Asymptomatic human immunodeficien.. | 10 | 0.13 |
| A06.0 Acute amoebic dysentery           | 9  | 0.11 |
| A16.9 Respiratory tuberculosis unspec.. | 9  | 0.11 |
| A32.8 Other forms of listeriosis        | 9  | 0.11 |
| A39.4 Meningococcaemia, unspecified     | 9  | 0.11 |
| B05.8 Measles with other complications  | 9  | 0.11 |
| G03.8 Meningitis due to other specifi.. | 9  | 0.11 |
| M01.2 Arthritis in Lyme disease         | 9  | 0.11 |
| A15.2 Tuberculosis of lung, confirmed.. | 8  | 0.1  |
| A18.3 Tuberculosis of intestines, per.. | 8  | 0.1  |
| A60.9 Anogenital herpesviral infectio.. | 8  | 0.1  |
| B02.2 Zoster with other nervous syste.. | 8  | 0.1  |
| B26.3 Mumps pancreatitis                | 8  | 0.1  |
| B67 Echinococcosis                      | 8  | 0.1  |
| H62.1 Otitis externa in viral disease.. | 8  | 0.1  |
| A42.9 Actinomycosis, unspecified        | 7  | 0.09 |
| B02.1 Zoster meningitis                 | 7  | 0.09 |
| B18.9 Chronic viral hepatitis, unspec.. | 7  | 0.09 |
| B19.0 Unspecified viral hepatitis wit.. | 7  | 0.09 |
| B25.0 Cytomegaloviral pneumonitis       | 7  | 0.09 |

|                                         |    |       |
|-----------------------------------------|----|-------|
| H19.1 Herpesviral keratitis and kerat.. | 7  | 0.09  |
| H19.2 Keratitis and keratoconjunctivi.. | 7  | 0.09  |
| J17.2 Pneumonia in mycoses              | 7  | 0.09  |
| A18.8 Tuberculosis of other specified.. | 6  | 0.08  |
| A84.9 Tick-borne viral encephalitis, .. | 6  | 0.08  |
| B02.7 Disseminated zoster               | 6  | 0.08  |
| B08.5 Enteroviral vesicular pharyngitis | 6  | 0.08  |
| B15.0 Hepatitis A with hepatic coma     | 6  | 0.08  |
| B26.8 Mumps with other complications    | 6  | 0.08  |
| B97.1 Enterovirus as the cause of dis.. | 6  | 0.08  |
| G03.0 Nonpyogenic meningitis            | 6  | 0.08  |
| A15.4 Tuberculosis of intrathoracic l.. | 5  | 0.06  |
| A15.7 Primary respiratory tuberculosi.. | 5  | 0.06  |
| A15.9 Respiratory tuberculosis unspec.. | 5  | 0.06  |
| A16.1 Tuberculosis of lung, bacteriol.. | 5  | 0.06  |
| A18.4 Tuberculosis of skin and subcut.. | 5  | 0.06  |
| A42.8 Other forms of actinomycosis      | 5  | 0.06  |
| A51.5 Early syphilis, latent            | 5  | 0.06  |
| A51.9 Early syphilis, unspecified       | 5  | 0.06  |
| B17.8 Other specified acute viral hep.. | 5  | 0.06  |
| G00.2 Streptococcal meningitis          | 5  | 0.06  |
| G00.3 Staphylococcal meningitis         | 5  | 0.06  |
| G05.0 Encephalitis, myelitis and ence.. | 5  | 0.06  |
| H32.0 Chorioretinal inflammation in i.. | 5  | 0.06  |
| O98.0 Tuberculosis complicating pregn.. | 5  | 0.06  |
| A06.2 Amoebic nondysenteric colitis     | <5 | <0.06 |
| A06.4 Amoebic liver abscess             | <5 | <0.06 |
| A06.5 Amoebic lung abscess              | <5 | <0.06 |
| A06.7 Cutaneous amoebiasis              | <5 | <0.06 |
| A06.8 Amoebic infection of other sites  | <5 | <0.06 |
| A15.3 Tuberculosis of lung, confirmed.. | <5 | <0.06 |
| A15.5 Tuberculosis of larynx, trachea.. | <5 | <0.06 |
| A15.8 Other respiratory tuberculosis,.. | <5 | <0.06 |
| A16.3 Tuberculosis of intrathoracic l.. | <5 | <0.06 |
| A16.4 Tuberculosis of larynx, trachea.. | <5 | <0.06 |
| A16.7 Primary respiratory tuberculosi.. | <5 | <0.06 |
| A16.8 Other respiratory tuberculosis,.. | <5 | <0.06 |
| A17.0 Tuberculous meningitis            | <5 | <0.06 |
| A17.9 Tuberculosis of nervous system,.. | <5 | <0.06 |
| A19.0 Acute miliary tuberculosis of a.. | <5 | <0.06 |
| A19.2 Acute miliary tuberculosis, uns.. | <5 | <0.06 |
| A19.9 Miliary tuberculosis, unspecified | <5 | <0.06 |
| A20.9 Plague, unspecified               | <5 | <0.06 |
| A22.0 Cutaneous anthrax                 | <5 | <0.06 |
| A22.2 Gastrointestinal anthrax          | <5 | <0.06 |
| A23.9 Brucellosis, unspecified          | <5 | <0.06 |
| A24.1 Acute and fulminating melioidosis | <5 | <0.06 |
| A25.9 Rat-bite fever, unspecified       | <5 | <0.06 |

|                                         |    |       |
|-----------------------------------------|----|-------|
| A27 Leptospirosis                       | <5 | <0.06 |
| A27.0 Leptospirosis icterohaemorrhagica | <5 | <0.06 |
| A27.8 Other forms of leptospirosis      | <5 | <0.06 |
| A28.0 Pasteurellosis                    | <5 | <0.06 |
| A32.1 Listerial meningitis and mening.. | <5 | <0.06 |
| A32.9 Listeriosis, unspecified          | <5 | <0.06 |
| A39 Meningococcal infection             | <5 | <0.06 |
| A39.1 Waterhouse-Friderichsen syndrome  | <5 | <0.06 |
| A39.5 Meningococcal heart disease       | <5 | <0.06 |
| A39.8 Other meningococcal infections    | <5 | <0.06 |
| A39.9 Meningococcal infection, unspec.. | <5 | <0.06 |
| A41.3 Sepsis due to Haemophilus influ.. | <5 | <0.06 |
| A42 Actinomycosis                       | <5 | <0.06 |
| A42.0 Pulmonary actinomycosis           | <5 | <0.06 |
| A42.1 Abdominal actinomycosis           | <5 | <0.06 |
| A42.2 Cervicofacial actinomycosis       | <5 | <0.06 |
| A42.7 Actinomycotic sepsis              | <5 | <0.06 |
| A43.0 Pulmonary nocardiosis             | <5 | <0.06 |
| A44.1 Cutaneous and mucocutaneous bar.. | <5 | <0.06 |
| A44.8 Other forms of bartonellosis      | <5 | <0.06 |
| A44.9 Bartonellosis, unspecified        | <5 | <0.06 |
| A49.2 Haemophilus influenzae infectio.. | <5 | <0.06 |
| A50 Congenital syphilis                 | <5 | <0.06 |
| A50.5 Other late congenital syphilis,.. | <5 | <0.06 |
| A50.9 Congenital syphilis, unspecified  | <5 | <0.06 |
| A51.1 Primary anal syphilis             | <5 | <0.06 |
| A51.2 Primary syphilis of other sites   | <5 | <0.06 |
| A51.4 Other secondary syphilis          | <5 | <0.06 |
| A52.0 Cardiovascular syphilis           | <5 | <0.06 |
| A52.7 Other symptomatic late syphilis   | <5 | <0.06 |
| A52.8 Late syphilis, latent             | <5 | <0.06 |
| A53 Other and unspecified syphilis      | <5 | <0.06 |
| A53.9 Syphilis, unspecified             | <5 | <0.06 |
| A60.1 Herpesviral infection of perian.. | <5 | <0.06 |
| A68 Relapsing fevers                    | <5 | <0.06 |
| A68.9 Relapsing fever, unspecified      | <5 | <0.06 |
| A69.9 Spirochaetal infection, unspeci.. | <5 | <0.06 |
| A70 Chlamydia psittaci infection        | <5 | <0.06 |
| A75.0 Epidemic louse-borne typhus fev.. | <5 | <0.06 |
| A75.9 Typhus fever, unspecified         | <5 | <0.06 |
| A77.1 Spotted fever due to Rickettsia.. | <5 | <0.06 |
| A77.8 Other spotted fevers              | <5 | <0.06 |
| A78 Q fever                             | <5 | <0.06 |
| A79 Other rickettsioses                 | <5 | <0.06 |
| A79.9 Rickettsiosis, unspecified        | <5 | <0.06 |
| A80 Acute poliomyelitis                 | <5 | <0.06 |
| A80.1 Acute paralytic poliomyelitis, .. | <5 | <0.06 |
| A80.3 Acute paralytic poliomyelitis, .. | <5 | <0.06 |



|                                         |    |       |
|-----------------------------------------|----|-------|
| A81.2 Progressive multifocal leukoenc.. | <5 | <0.06 |
| A83.0 Japanese encephalitis             | <5 | <0.06 |
| A83.2 Eastern equine encephalitis       | <5 | <0.06 |
| A83.6 Rocio virus disease               | <5 | <0.06 |
| A83.8 Other mosquito-borne viral ence.. | <5 | <0.06 |
| A84 Tick-borne viral encephalitis       | <5 | <0.06 |
| A84.1 Central European tick-borne enc.. | <5 | <0.06 |
| A85.0 Enteroviral encephalitis          | <5 | <0.06 |
| A85.1 Adenoviral encephalitis           | <5 | <0.06 |
| A85.2 Arthropod-borne viral encephali.. | <5 | <0.06 |
| A85.8 Other specified viral encephali.. | <5 | <0.06 |
| A87.1 Adenoviral meningitis             | <5 | <0.06 |
| A87.2 Lymphocytic choriomeningitis      | <5 | <0.06 |
| A88.1 Epidemic vertigo                  | <5 | <0.06 |
| A96.0 Junin haemorrhagic fever          | <5 | <0.06 |
| A98.1 Omsk haemorrhagic fever           | <5 | <0.06 |
| A98.3 Marburg virus disease             | <5 | <0.06 |
| A98.4 Ebola virus disease               | <5 | <0.06 |
| B00.3 Herpesviral meningitis            | <5 | <0.06 |
| B01.0 Varicella meningitis              | <5 | <0.06 |
| B02 Zoster [herpes zoster]              | <5 | <0.06 |
| B05 Measles                             | <5 | <0.06 |
| B05.3 Measles complicated by otitis m.. | <5 | <0.06 |
| B06.8 Rubella with other complications  | <5 | <0.06 |
| B08.4 Enteroviral vesicular stomatiti.. | <5 | <0.06 |
| B16.0 Acute hepatitis B with delta-ag.. | <5 | <0.06 |
| B16.1 Acute hepatitis B with delta-ag.. | <5 | <0.06 |
| B17.0 Acute delta-(super)infection of.. | <5 | <0.06 |
| B17.2 Acute hepatitis E                 | <5 | <0.06 |
| B18.0 Chronic viral hepatitis B with .. | <5 | <0.06 |
| B18.8 Other chronic viral hepatitis     | <5 | <0.06 |
| B20.0 HIV disease resulting in mycoba.. | <5 | <0.06 |
| B20.6 HIV disease resulting in Pneumo.. | <5 | <0.06 |
| B21.2 HIV disease resulting in other .. | <5 | <0.06 |
| B21.9 HIV disease resulting in unspec.. | <5 | <0.06 |
| B22.0 HIV disease resulting in enceph.. | <5 | <0.06 |
| B23.8 HIV disease resulting in other .. | <5 | <0.06 |
| B26 Mumps                               | <5 | <0.06 |
| B26.1 Mumps meningitis                  | <5 | <0.06 |
| B37.1 Pulmonary candidiasis             | <5 | <0.06 |
| B37.2 Candidiasis of skin and nail      | <5 | <0.06 |
| B37.9 Candidiasis, unspecified          | <5 | <0.06 |
| B38 Coccidioidomycosis                  | <5 | <0.06 |
| B38.0 Acute pulmonary coccidioidomyco.. | <5 | <0.06 |
| B38.1 Chronic pulmonary coccidioidomy.. | <5 | <0.06 |
| B39.1 Chronic pulmonary histoplasmosi.. | <5 | <0.06 |
| B39.3 Disseminated histoplasmosis cap.. | <5 | <0.06 |
| B39.4 Histoplasmosis capsulati, unspe.. | <5 | <0.06 |

|                                         |              |               |
|-----------------------------------------|--------------|---------------|
| B40 Blastomycosis                       | <5           | <0.06         |
| B43.9 Chromomycosis, unspecified        | <5           | <0.06         |
| B45.0 Pulmonary cryptococcosis          | <5           | <0.06         |
| B46.0 Pulmonary mucormycosis            | <5           | <0.06         |
| B46.4 Disseminated mucormycosis         | <5           | <0.06         |
| B49 Unspecified mycosis                 | <5           | <0.06         |
| B50.0 Plasmodium falciparum malaria w.. | <5           | <0.06         |
| B50.8 Other severe and complicated Pl.. | <5           | <0.06         |
| B58.8 Toxoplasmosis with other organ .. | <5           | <0.06         |
| B65.2 Schistosomiasis due to Schistos.. | <5           | <0.06         |
| B65.9 Schistosomiasis, unspecified      | <5           | <0.06         |
| B67.3 Echinococcus granulosus infecti.. | <5           | <0.06         |
| B67.8 Echinococcosis, unspecified, of.. | <5           | <0.06         |
| B67.9 Echinococcosis, other and unspe.. | <5           | <0.06         |
| B68.0 Taenia solium taeniasis           | <5           | <0.06         |
| B68.9 Taeniasis, unspecified            | <5           | <0.06         |
| B69.0 Cysticercosis of central nervou.. | <5           | <0.06         |
| B78.0 Intestinal strongyloidiasis       | <5           | <0.06         |
| B81.4 Mixed intestinal helminthiasis    | <5           | <0.06         |
| B83.0 Visceral larva migrans            | <5           | <0.06         |
| B87.1 Wound myiasis                     | <5           | <0.06         |
| B87.9 Myiasis, unspecified              | <5           | <0.06         |
| B96.3 Haemophilus influenzae [H. infl.. | <5           | <0.06         |
| G03.1 Chronic meningitis                | <5           | <0.06         |
| G04.1 Tropical spastic paraplegia       | <5           | <0.06         |
| G04.2 Bacterial meningoencephalitis a.. | <5           | <0.06         |
| G05.2 Encephalitis, myelitis and ence.. | <5           | <0.06         |
| G06 Intracranial and intraspinal absc.. | <5           | <0.06         |
| G06.2 Extradural and subdural abscess.. | <5           | <0.06         |
| G07 Intracranial and intraspinal absc.. | <5           | <0.06         |
| H19.0 Scleritis and episcleritis in d.. | <5           | <0.06         |
| H22.0 Iridocyclitis in infectious and.. | <5           | <0.06         |
| H60.2 Malignant otitis externa          | <5           | <0.06         |
| H62.2 Otitis externa in mycoses         | <5           | <0.06         |
| I68.1 Cerebral arteritis in infectiou.. | <5           | <0.06         |
| K23.0 Tuberculous oesophagitis          | <5           | <0.06         |
| K67.3 Tuberculous peritonitis           | <5           | <0.06         |
| M00.1 Pneumococcal arthritis and poly.. | <5           | <0.06         |
| M01.0 Meningococcal arthritis           | <5           | <0.06         |
| M01.1 Tuberculous arthritis             | <5           | <0.06         |
| M49.0 Tuberculosis of spine             | <5           | <0.06         |
| M49.1 Brucella spondylitis              | <5           | <0.06         |
| O98.1 Syphilis complicating pregnancy.. | <5           | <0.06         |
| P37.1 Congenital toxoplasmosis          | <5           | <0.06         |
| <b>Total</b>                            | <b>7 974</b> | <b>100.00</b> |

**eTable 26. Distribution of infections not predisposed towards entering the central nervous system in primary analysis (Finnish multicohort sample)**

| ICD-10 code and description             | N      | %     |
|-----------------------------------------|--------|-------|
| K35 Acute appendicitis                  | 12 102 | 17.04 |
| J18.9 Pneumonia, unspecified            | 6364   | 8.96  |
| A09 Other gastroenteritis and colitis.. | 5789   | 8.15  |
| N10 Acute tubulo-interstitial nephritis | 3719   | 5.24  |
| A46 Erysipelas                          | 3215   | 4.53  |
| J03.9 Acute tonsillitis, unspecified    | 3191   | 4.49  |
| J36 Peritonsillar abscess               | 3106   | 4.37  |
| J15.9 Bacterial pneumonia, unspecified  | 2358   | 3.32  |
| N70.0 Acute salpingitis and oophoritis  | 1827   | 2.57  |
| O85 Puerperal sepsis                    | 1760   | 2.48  |
| J20.9 Acute bronchitis, unspecified     | 1209   | 1.7   |
| N39.0 Urinary tract infection, site n.. | 1104   | 1.55  |
| J01.0 Acute maxillary sinusitis         | 1082   | 1.52  |
| J03.0 Streptococcal tonsillitis         | 970    | 1.37  |
| A63.0 Anogenital (venereal) warts       | 864    | 1.22  |
| A08.4 Viral intestinal infection, uns.. | 836    | 1.18  |
| J22 Unspecified acute lower respirato.. | 791    | 1.11  |
| N71.0 Acute inflammatory disease of u.. | 740    | 1.04  |
| J02.9 Acute pharyngitis, unspecified    | 711    | 1     |
| J04.0 Acute laryngitis                  | 690    | 0.97  |
| A98.5 Haemorrhagic fever with renal s.. | 591    | 0.83  |
| A08.5 Other specified intestinal infe.. | 498    | 0.7   |
| K57.2 Diverticular disease of large i.. | 469    | 0.66  |
| N30.0 Acute cystitis                    | 459    | 0.65  |
| J18.0 Bronchopneumonia, unspecified     | 457    | 0.64  |
| A41.5 Sepsis due to other Gram-negati.. | 450    | 0.63  |
| O08.0 Genital tract and pelvic infect.. | 376    | 0.53  |
| O03.5 Spontaneous abortion: Complete .. | 369    | 0.52  |
| K61.0 Anal abscess                      | 340    | 0.48  |
| K05.3 Chronic periodontitis             | 336    | 0.47  |
| A04.7 Enterocolitis due to Clostridiu.. | 329    | 0.46  |
| H66.0 Acute suppurative otitis media    | 307    | 0.43  |
| A41.9 Sepsis, unspecified               | 306    | 0.43  |
| N75.1 Abscess of Bartholin gland        | 301    | 0.42  |
| J11.1 Influenza with other respirator.. | 289    | 0.41  |
| K04.7 Periapical abscess without sinus  | 275    | 0.39  |
| J11.8 Influenza with other manifestat.. | 262    | 0.37  |
| N61 Inflammatory disorders of breast    | 260    | 0.37  |
| L04 Acute lymphadenitis                 | 233    | 0.33  |
| M00.9 Pyogenic arthritis, unspecified   | 217    | 0.31  |
| J10.1 Influenza with other respirator.. | 216    | 0.3   |
| N45.9 Orchitis, epididymitis and epid.. | 210    | 0.3   |
| K04.5 Chronic apical periodontitis      | 209    | 0.29  |
| L03.0 Cellulitis of finger and toe      | 201    | 0.28  |
| A04.5 Campylobacter enteritis           | 196    | 0.28  |

|                                         |     |      |
|-----------------------------------------|-----|------|
| B99 Other and unspecified infectious .. | 196 | 0.28 |
| A41.0 Sepsis due to Staphylococcus au.. | 188 | 0.26 |
| O23.0 Infections of kidney in pregnancy | 178 | 0.25 |
| O23.5 Infections of the genital tract.. | 178 | 0.25 |
| K61 Abscess of anal and rectal regions  | 177 | 0.25 |
| O03.0 Spontaneous abortion: Incomplet.. | 174 | 0.24 |
| J05.1 Acute epiglottitis                | 173 | 0.24 |
| K02.1 Caries of dentine                 | 171 | 0.24 |
| L08.9 Local infection of skin and sub.. | 171 | 0.24 |
| L05.0 Pilonidal cyst with abscess       | 169 | 0.24 |
| O86.0 Infection of obstetric surgical.. | 166 | 0.23 |
| L02 Cutaneous abscess, furuncle and c.. | 165 | 0.23 |
| O23.9 Other and unspecified genitouri.. | 161 | 0.23 |
| A02.0 Salmonella enteritis              | 158 | 0.22 |
| A41.8 Other specified sepsis            | 157 | 0.22 |
| J15.8 Other bacterial pneumonia         | 152 | 0.21 |
| L02.4 Cutaneous abscess, furuncle and.. | 151 | 0.21 |
| J12 Viral pneumonia, not elsewhere cl.. | 148 | 0.21 |
| B07 Viral warts                         | 138 | 0.19 |
| O86.1 Other infection of genital trac.. | 134 | 0.19 |
| B86 Scabies                             | 129 | 0.18 |
| O86.4 Pyrexia of unknown origin follo.. | 124 | 0.17 |
| L03.1 Cellulitis of other parts of limb | 123 | 0.17 |
| J18.1 Lobar pneumonia, unspecified      | 115 | 0.16 |
| K05.2 Acute periodontitis               | 115 | 0.16 |
| A02 Other salmonella infections         | 110 | 0.15 |
| K02 Dental caries                       | 108 | 0.15 |
| L04.0 Acute lymphadenitis of face, he.. | 105 | 0.15 |
| B35 Dermatophytosis                     | 103 | 0.15 |
| A56.1 Chlamydial infection of pelvipe.. | 100 | 0.14 |
| J15.7 Pneumonia due to Mycoplasma pne.. | 94  | 0.13 |
| L02.2 Cutaneous abscess, furuncle and.. | 93  | 0.13 |
| O23.4 Unspecified infection of urinar.. | 93  | 0.13 |
| O04.0 Medical abortion: Incomplete, c.. | 92  | 0.13 |
| J86.9 Pyothorax without fistula         | 89  | 0.13 |
| A04.9 Bacterial intestinal infection,.. | 87  | 0.12 |
| L03.9 Cellulitis, unspecified           | 84  | 0.12 |
| O23.1 Infections of bladder in pregna.. | 84  | 0.12 |
| H00.1 Chalazion                         | 82  | 0.12 |
| H10.0 Mucopurulent conjunctivitis       | 82  | 0.12 |
| L02.3 Cutaneous abscess, furuncle and.. | 81  | 0.11 |
| A95 Yellow fever                        | 79  | 0.11 |
| M71.1 Other infective bursitis          | 78  | 0.11 |
| J16.8 Pneumonia due to other specifie.. | 77  | 0.11 |
| O86.2 Urinary tract infection followi.. | 77  | 0.11 |
| A08.3 Other viral enteritis             | 75  | 0.11 |
| H60.3 Other infective otitis externa    | 75  | 0.11 |
| N41.0 Acute prostatitis                 | 75  | 0.11 |

|                                         |    |      |
|-----------------------------------------|----|------|
| A54.9 Gonococcal infection, unspecified | 74 | 0.1  |
| L08.8 Other specified local infection.. | 73 | 0.1  |
| M86.9 Osteomyelitis, unspecified        | 73 | 0.1  |
| J09 Influenza due to certain identifi.. | 68 | 0.1  |
| N76.4 Abscess of vulva                  | 68 | 0.1  |
| J39.0 Retropharyngeal and parapharyng.. | 67 | 0.09 |
| K57.0 Diverticular disease of small i.. | 67 | 0.09 |
| O04.5 Medical abortion: Complete or u.. | 67 | 0.09 |
| M86.1 Other acute osteomyelitis         | 66 | 0.09 |
| J10.0 Influenza with pneumonia, other.. | 64 | 0.09 |
| K04.6 Periapical abscess with sinus     | 64 | 0.09 |
| O86.8 Other specified puerperal infec.. | 63 | 0.09 |
| O75.3 Other infection during labour     | 62 | 0.09 |
| O98.8 Other maternal infectious and p.. | 61 | 0.09 |
| A04.8 Other specified bacterial intes.. | 60 | 0.08 |
| A54.2 Gonococcal pelviperitonitis and.. | 58 | 0.08 |
| H62.0 Otitis externa in bacterial dis.. | 57 | 0.08 |
| N77.1 Vaginitis, vulvitis and vulvova.. | 57 | 0.08 |
| B09 Unspecified viral infection chara.. | 56 | 0.08 |
| A74.9 Chlamydial infection, unspecified | 55 | 0.08 |
| L02.1 Cutaneous abscess, furuncle and.. | 54 | 0.08 |
| L02.9 Cutaneous abscess, furuncle and.. | 54 | 0.08 |
| A40.8 Other streptococcal sepsis        | 52 | 0.07 |
| N73.3 Female acute pelvic peritonitis   | 52 | 0.07 |
| O91.1 Abscess of breast associated wi.. | 52 | 0.07 |
| L03.2 Cellulitis of face                | 51 | 0.07 |
| A38 Scarlet fever                       | 49 | 0.07 |
| L03.8 Cellulitis of other sites         | 48 | 0.07 |
| H00.0 Hordeolum and other deep inflam.. | 47 | 0.07 |
| A40.9 Streptococcal sepsis, unspecified | 45 | 0.06 |
| A40.0 Sepsis due to streptococcus, gr.. | 43 | 0.06 |
| J20.0 Acute bronchitis due to Mycopla.. | 43 | 0.06 |
| A56.0 Chlamydial infection of lower g.. | 42 | 0.06 |
| B08.1 Molluscum contagiosum             | 42 | 0.06 |
| J11.0 Influenza with pneumonia, virus.. | 42 | 0.06 |
| K61.1 Rectal abscess                    | 42 | 0.06 |
| O98.3 Other infections with a predomi.. | 42 | 0.06 |
| I40.0 Infective myocarditis             | 41 | 0.06 |
| J02.0 Streptococcal pharyngitis         | 40 | 0.06 |
| L02.0 Cutaneous abscess, furuncle and.. | 40 | 0.06 |
| A41.1 Sepsis due to other specified s.. | 39 | 0.05 |
| L08.0 Pyoderma                          | 39 | 0.05 |
| A08.0 Rotaviral enteritis               | 38 | 0.05 |
| J18.8 Other pneumonia, organism unspe.. | 38 | 0.05 |
| J12.9 Viral pneumonia, unspecified      | 37 | 0.05 |
| K02.9 Dental caries, unspecified        | 37 | 0.05 |
| B85 Pediculosis and phthiriasis         | 36 | 0.05 |
| M71.0 Abscess of bursa                  | 36 | 0.05 |

|                                         |    |      |
|-----------------------------------------|----|------|
| B97.7 Papillomavirus as the cause of .. | 35 | 0.05 |
| J04.2 Acute laryngotracheitis           | 35 | 0.05 |
| H60.1 Cellulitis of external ear        | 34 | 0.05 |
| L02.8 Cutaneous abscess, furuncle and.. | 34 | 0.05 |
| A04.6 Enteritis due to Yersinia enter.. | 32 | 0.05 |
| A02.1 Salmonella sepsis                 | 31 | 0.04 |
| M86.6 Other chronic osteomyelitis       | 31 | 0.04 |
| A59.0 Urogenital trichomoniasis         | 30 | 0.04 |
| J85.2 Abscess of lung without pneumonia | 30 | 0.04 |
| L03.3 Cellulitis of trunk               | 29 | 0.04 |
| N73.0 Acute parametritis and pelvic c.. | 29 | 0.04 |
| A37 Whooping cough                      | 27 | 0.04 |
| H60.0 Abscess of external ear           | 27 | 0.04 |
| A05.9 Bacterial foodborne intoxicatio.. | 26 | 0.04 |
| J10.8 Influenza with other manifestat.. | 26 | 0.04 |
| J86.0 Pyothorax with fistula            | 26 | 0.04 |
| M00.0 Staphylococcal arthritis and po.. | 26 | 0.04 |
| A41.2 Sepsis due to unspecified staph.. | 25 | 0.04 |
| K63.0 Abscess of intestine              | 25 | 0.04 |
| O98.9 Unspecified maternal infectious.. | 25 | 0.04 |
| K75.0 Abscess of liver                  | 24 | 0.03 |
| H44.0 Purulent endophthalmitis          | 23 | 0.03 |
| I30.1 Infective pericarditis            | 23 | 0.03 |
| J21.9 Acute bronchiolitis, unspecified  | 23 | 0.03 |
| O86.3 Other genitourinary tract infec.. | 22 | 0.03 |
| A21.0 Ulceroglandular tularaemia        | 21 | 0.03 |
| A21.9 Tularaemia, unspecified           | 21 | 0.03 |
| K11.3 Abscess of salivary gland         | 21 | 0.03 |
| K61.2 Anorectal abscess                 | 21 | 0.03 |
| M65.0 Abscess of tendon sheath          | 21 | 0.03 |
| N76.0 Acute vaginitis                   | 21 | 0.03 |
| A54.1 Gonococcal infection of lower g.. | 20 | 0.03 |
| J17.3 Pneumonia in parasitic diseases   | 20 | 0.03 |
| K04.4 Acute apical periodontitis of p.. | 19 | 0.03 |
| J04.1 Acute tracheitis                  | 18 | 0.03 |
| M46.3 Infection of intervertebral dis.. | 18 | 0.03 |
| N74.4 Female chlamydial pelvic inflam.. | 18 | 0.03 |
| B59 Pneumocystosis                      | 17 | 0.02 |
| J86 Pyothorax                           | 17 | 0.02 |
| N15.1 Renal and perinephric abscess     | 17 | 0.02 |
| A07 Other protozoal intestinal diseases | 16 | 0.02 |
| A41.4 Sepsis due to anaerobes           | 16 | 0.02 |
| L01.0 Impetigo [any organism] [any si.. | 16 | 0.02 |
| A02.9 Salmonella infection, unspecified | 15 | 0.02 |
| A40.1 Sepsis due to streptococcus, gr.. | 15 | 0.02 |
| K57.4 Diverticular disease of both sm.. | 15 | 0.02 |
| N45.0 Orchitis, epididymitis and epid.. | 15 | 0.02 |
| O91.0 Infection of nipple associated .. | 15 | 0.02 |

|                                         |    |      |
|-----------------------------------------|----|------|
| J03.8 Acute tonsillitis due to other .. | 14 | 0.02 |
| M46.2 Osteomyelitis of vertebra         | 14 | 0.02 |
| M60.0 Infective myositis                | 14 | 0.02 |
| A01.4 Paratyphoid fever, unspecified    | 13 | 0.02 |
| A03.3 Shigellosis due to Shigella son.. | 13 | 0.02 |
| B35.1 Tinea unguium                     | 13 | 0.02 |
| J85.1 Abscess of lung with pneumonia    | 13 | 0.02 |
| N34.0 Urethral abscess                  | 13 | 0.02 |
| A31.0 Pulmonary mycobacterial infection | 12 | 0.02 |
| B30 Viral conjunctivitis                | 12 | 0.02 |
| L70.1 Acne conglobata                   | 12 | 0.02 |
| O06.5 Unspecified abortion: Complete .. | 12 | 0.02 |
| J20.5 Acute bronchitis due to respira.. | 11 | 0.02 |
| K61.3 Ischiorectal abscess              | 11 | 0.02 |
| L01 Impetigo                            | 11 | 0.02 |
| L04.9 Acute lymphadenitis, unspecified  | 11 | 0.02 |
| A01.2 Paratyphoid fever B               | 10 | 0.01 |
| A03.1 Shigellosis due to Shigella fle.. | 10 | 0.01 |
| A64 Unspecified sexually transmitted .. | 10 | 0.01 |
| B33.2 Viral carditis                    | 10 | 0.01 |
| J16.0 Chlamydial pneumonia              | 10 | 0.01 |
| L01.1 Impetiginization of other derma.. | 10 | 0.01 |
| M00.2 Other streptococcal arthritis a.. | 10 | 0.01 |
| N08.0 Glomerular disorders in infecti.. | 10 | 0.01 |
| N13.6 Pyonephrosis                      | 10 | 0.01 |
| A63.8 Other specified predominantly s.. | 9  | 0.01 |
| B08.8 Other specified viral infection.. | 9  | 0.01 |
| B53.0 Plasmodium ovale malaria          | 9  | 0.01 |
| K02.8 Other dental caries               | 9  | 0.01 |
| K04.0 Pulpitis                          | 9  | 0.01 |
| K77.0 Liver disorders in infectious a.. | 9  | 0.01 |
| A01.0 Typhoid fever                     | 8  | 0.01 |
| A02.8 Other specified salmonella infe.. | 8  | 0.01 |
| A04.3 Enterohaemorrhagic Escherichia .. | 8  | 0.01 |
| A54.0 Gonococcal infection of lower g.. | 8  | 0.01 |
| B80 Enterobiasis                        | 8  | 0.01 |
| J20.8 Acute bronchitis due to other s.. | 8  | 0.01 |
| J39.1 Other abscess of pharynx          | 8  | 0.01 |
| N77.0 Ulceration of vulva in infectio.. | 8  | 0.01 |
| O07.0 Failed medical abortion, compli.. | 8  | 0.01 |
| O07.5 Other and unspecified failed at.. | 8  | 0.01 |
| A74.8 Other chlamydial diseases         | 7  | 0.01 |
| B36 Other superficial mycoses           | 7  | 0.01 |
| B51.9 Plasmodium vivax malaria withou.. | 7  | 0.01 |
| J21.0 Acute bronchiolitis due to resp.. | 7  | 0.01 |
| K05.0 Acute gingivitis                  | 7  | 0.01 |
| O05.0 Other abortion: Incomplete, com.. | 7  | 0.01 |
| O05.5 Other abortion: Complete or uns.. | 7  | 0.01 |

|                                         |    |       |
|-----------------------------------------|----|-------|
| A08.1 Acute gastroenteropathy due to .. | 6  | 0.01  |
| A31 Infection due to other mycobacteria | 6  | 0.01  |
| A48.0 Gas gangrene                      | 6  | 0.01  |
| B08.3 Erythema infectiosum [fifth dis.. | 6  | 0.01  |
| B35.3 Tinea pedis                       | 6  | 0.01  |
| B77.9 Ascariasis, unspecified           | 6  | 0.01  |
| B95.6 Staphylococcus aureus as the ca.. | 6  | 0.01  |
| B95.8 Unspecified staphylococcus as t.. | 6  | 0.01  |
| H10.5 Blepharconjunctivitis             | 6  | 0.01  |
| J15.2 Pneumonia due to staphylococcus   | 6  | 0.01  |
| J85.3 Abscess of mediastinum            | 6  | 0.01  |
| M65.1 Other infective (teno)synovitis   | 6  | 0.01  |
| O06.0 Unspecified abortion: Incomplet.. | 6  | 0.01  |
| A03.9 Shigellosis, unspecified          | 5  | 0.01  |
| A07.1 Giardiasis [lamblia]s]            | 5  | 0.01  |
| A31.9 Mycobacterial infection, unspec.. | 5  | 0.01  |
| B74 Filariasis                          | 5  | 0.01  |
| I41.1 Myocarditis in viral diseases c.. | 5  | 0.01  |
| J12.1 Respiratory syncytial virus pne.. | 5  | 0.01  |
| J15.3 Pneumonia due to streptococcus,.. | 5  | 0.01  |
| K57.8 Diverticular disease of intesti.. | 5  | 0.01  |
| L04.2 Acute lymphadenitis of upper limb | 5  | 0.01  |
| L04.8 Acute lymphadenitis of other si.. | 5  | 0.01  |
| M72.6 Necrotizing fasciitis             | 5  | 0.01  |
| M86.0 Acute haematogenous osteomyelitis | 5  | 0.01  |
| M86.2 Subacute osteomyelitis            | 5  | 0.01  |
| M86.8 Other osteomyelitis               | 5  | 0.01  |
| A00.9 Cholera, unspecified              | <5 | <0.01 |
| A01.1 Paratyphoid fever A               | <5 | <0.01 |
| A01.3 Paratyphoid fever C               | <5 | <0.01 |
| A03 Shigellosis                         | <5 | <0.01 |
| A03.0 Shigellosis due to Shigella dys.. | <5 | <0.01 |
| A03.2 Shigellosis due to Shigella boy.. | <5 | <0.01 |
| A04.0 Enteropathogenic Escherichia co.. | <5 | <0.01 |
| A04.2 Enteroinvasive Escherichia coli.. | <5 | <0.01 |
| A04.4 Other intestinal Escherichia co.. | <5 | <0.01 |
| A05.0 Foodborne staphylococcal intoxi.. | <5 | <0.01 |
| A05.1 Botulism                          | <5 | <0.01 |
| A05.2 Foodborne Clostridium perfringe.. | <5 | <0.01 |
| A05.8 Other specified bacterial foodb.. | <5 | <0.01 |
| A07.0 Balantidiasis                     | <5 | <0.01 |
| A07.2 Cryptosporidiosis                 | <5 | <0.01 |
| A07.3 Isosporiasis                      | <5 | <0.01 |
| A07.8 Other specified protozoal intes.. | <5 | <0.01 |
| A07.9 Protozoal intestinal disease, u.. | <5 | <0.01 |
| A21.1 Oculoglandular tularaemia         | <5 | <0.01 |
| A21.2 Pulmonary tularaemia              | <5 | <0.01 |
| A21.7 Generalized tularaemia            | <5 | <0.01 |



|                                         |    |       |
|-----------------------------------------|----|-------|
| A21.8 Other forms of tularaemia         | <5 | <0.01 |
| A24.0 Glanders                          | <5 | <0.01 |
| A26.0 Cutaneous erysipeloid             | <5 | <0.01 |
| A26.9 Erysipeloid, unspecified          | <5 | <0.01 |
| A28.2 Extraintestinal yersiniosis       | <5 | <0.01 |
| A30 Leprosy [Hansen disease]            | <5 | <0.01 |
| A31.1 Cutaneous mycobacterial infection | <5 | <0.01 |
| A31.8 Other mycobacterial infections    | <5 | <0.01 |
| A35 Other tetanus                       | <5 | <0.01 |
| A36 Diphtheria                          | <5 | <0.01 |
| A37.0 Whooping cough due to Bordetell.. | <5 | <0.01 |
| A37.9 Whooping cough, unspecified       | <5 | <0.01 |
| A40 Streptococcal sepsis                | <5 | <0.01 |
| A40.2 Sepsis due to streptococcus, gr.. | <5 | <0.01 |
| A41 Other sepsis                        | <5 | <0.01 |
| A48.3 Toxic shock syndrome              | <5 | <0.01 |
| A49 Bacterial infection of unspecifie.. | <5 | <0.01 |
| A49.3 Mycoplasma infection, unspecifi.. | <5 | <0.01 |
| A54 Gonococcal infection                | <5 | <0.01 |
| A54.3 Gonococcal infection of eye       | <5 | <0.01 |
| A54.4 Gonococcal infection of musculo.. | <5 | <0.01 |
| A54.8 Other gonococcal infections       | <5 | <0.01 |
| A55 Chlamydial lymphogranuloma (vener.. | <5 | <0.01 |
| A56.2 Chlamydial infection of genitou.. | <5 | <0.01 |
| A56.3 Chlamydial infection of anus an.. | <5 | <0.01 |
| A56.8 Sexually transmitted chlamydial.. | <5 | <0.01 |
| A58 Granuloma inguinale                 | <5 | <0.01 |
| A66.1 Multiple papillomata and wet cr.. | <5 | <0.01 |
| A66.3 Hyperkeratosis of yaws            | <5 | <0.01 |
| A67 Pinta [carate]                      | <5 | <0.01 |
| A67.1 Intermediate lesions of pinta     | <5 | <0.01 |
| A69.0 Necrotizing ulcerative stomatitis | <5 | <0.01 |
| A69.1 Other Vincent infections          | <5 | <0.01 |
| A71 Trachoma                            | <5 | <0.01 |
| A98.0 Crimean-Congo haemorrhagic fever  | <5 | <0.01 |
| B08.0 Other orthopoxvirus infections    | <5 | <0.01 |
| B30.0 Keratoconjunctivitis due to ade.. | <5 | <0.01 |
| B30.8 Other viral conjunctivitis        | <5 | <0.01 |
| B33.0 Epidemic myalgia                  | <5 | <0.01 |
| B35.0 Tinea barbae and tinea capitis    | <5 | <0.01 |
| B35.2 Tinea manuum                      | <5 | <0.01 |
| B35.4 Tinea corporis                    | <5 | <0.01 |
| B35.6 Tinea cruris                      | <5 | <0.01 |
| B35.9 Dermatophytosis, unspecified      | <5 | <0.01 |
| B36.0 Pityriasis versicolor             | <5 | <0.01 |
| B36.9 Superficial mycosis, unspecified  | <5 | <0.01 |
| B41.0 Pulmonary paracoccidioidomycosis  | <5 | <0.01 |
| B44.0 Invasive pulmonary aspergillosis  | <5 | <0.01 |

|                                         |    |       |
|-----------------------------------------|----|-------|
| B44.1 Other pulmonary aspergillosis     | <5 | <0.01 |
| B44.8 Other forms of aspergillosis      | <5 | <0.01 |
| B44.9 Aspergillosis, unspecified        | <5 | <0.01 |
| B47.0 Eumycetoma                        | <5 | <0.01 |
| B47.9 Mycetoma, unspecified             | <5 | <0.01 |
| B48.1 Rhinosporidiosis                  | <5 | <0.01 |
| B48.7 Opportunistic mycoses             | <5 | <0.01 |
| B51 Plasmodium vivax malaria            | <5 | <0.01 |
| B51.0 Plasmodium vivax malaria with r.. | <5 | <0.01 |
| B52.0 Plasmodium malariae malaria wit.. | <5 | <0.01 |
| B52.9 Plasmodium malariae malaria wit.. | <5 | <0.01 |
| B53.8 Other parasitologically confirm.. | <5 | <0.01 |
| B55.1 Cutaneous leishmaniasis           | <5 | <0.01 |
| B55.2 Mucocutaneous leishmaniasis       | <5 | <0.01 |
| B60.8 Other specified protozoal disea.. | <5 | <0.01 |
| B65.0 Schistosomiasis due to Schistos.. | <5 | <0.01 |
| B65.1 Schistosomiasis due to Schistos.. | <5 | <0.01 |
| B68.1 Taenia saginata taeniasis         | <5 | <0.01 |
| B71.0 Hymenolepiasis                    | <5 | <0.01 |
| B75 Trichinellosis                      | <5 | <0.01 |
| B76 Hookworm diseases                   | <5 | <0.01 |
| B79 Trichuriasis                        | <5 | <0.01 |
| B81.0 Anisakiasis                       | <5 | <0.01 |
| B82.9 Intestinal parasitism, unspecif.. | <5 | <0.01 |
| B83.9 Helminthiasis, unspecified        | <5 | <0.01 |
| B85.1 Pediculosis due to Pediculus hu.. | <5 | <0.01 |
| B95.0 Streptococcus, group A, as the .. | <5 | <0.01 |
| B95.1 Streptococcus, group B, as the .. | <5 | <0.01 |
| B95.3 Streptococcus pneumoniae as the.. | <5 | <0.01 |
| B95.4 Other streptococcus as the caus.. | <5 | <0.01 |
| B95.5 Unspecified streptococcus as th.. | <5 | <0.01 |
| B95.7 Other staphylococcus as the cau.. | <5 | <0.01 |
| B96.1 Klebsiella pneumoniae [K. pneum.. | <5 | <0.01 |
| B96.2 Escherichia coli [E. coli] as t.. | <5 | <0.01 |
| B96.5 Pseudomonas (aeruginosa) as the.. | <5 | <0.01 |
| D73.3 Abscess of spleen                 | <5 | <0.01 |
| H01.0 Blepharitis                       | <5 | <0.01 |
| I32.0 Pericarditis in bacterial disea.. | <5 | <0.01 |
| J02.8 Acute pharyngitis due to other .. | <5 | <0.01 |
| J03 Acute tonsillitis                   | <5 | <0.01 |
| J10 Influenza due to other identified.. | <5 | <0.01 |
| J11 Influenza, virus not identified     | <5 | <0.01 |
| J12.0 Adenoviral pneumonia              | <5 | <0.01 |
| J12.2 Parainfluenza virus pneumonia     | <5 | <0.01 |
| J12.8 Other viral pneumonia             | <5 | <0.01 |
| J15 Bacterial pneumonia, not elsewher.. | <5 | <0.01 |
| J15.0 Pneumonia due to Klebsiella pne.. | <5 | <0.01 |
| J15.1 Pneumonia due to Pseudomonas      | <5 | <0.01 |

|                                         |               |               |
|-----------------------------------------|---------------|---------------|
| J15.4 Pneumonia due to other streptoc.. | <5            | <0.01         |
| J15.5 Pneumonia due to Escherichia coli | <5            | <0.01         |
| J15.6 Pneumonia due to other aerobic .. | <5            | <0.01         |
| J17.0 Pneumonia in bacterial diseases.. | <5            | <0.01         |
| J17.1 Pneumonia in viral diseases cla.. | <5            | <0.01         |
| J18.2 Hypostatic pneumonia, unspecified | <5            | <0.01         |
| J20 Acute bronchitis                    | <5            | <0.01         |
| J20.2 Acute bronchitis due to strepto.. | <5            | <0.01         |
| J20.4 Acute bronchitis due to parainf.. | <5            | <0.01         |
| J20.6 Acute bronchitis due to rhinovi.. | <5            | <0.01         |
| J21.8 Acute bronchiolitis due to othe.. | <5            | <0.01         |
| K02.0 Caries limited to enamel          | <5            | <0.01         |
| K02.2 Caries of cementum                | <5            | <0.01         |
| K02.3 Arrested dental caries            | <5            | <0.01         |
| K61.4 Intrasphincteric abscess          | <5            | <0.01         |
| K67.8 Other disorders of peritoneum i.. | <5            | <0.01         |
| K75.1 Phlebitis of portal vein          | <5            | <0.01         |
| L00 Staphylococcal scalded skin syndr.. | <5            | <0.01         |
| L04.1 Acute lymphadenitis of trunk      | <5            | <0.01         |
| L04.3 Acute lymphadenitis of lower limb | <5            | <0.01         |
| L08.1 Erythrasma                        | <5            | <0.01         |
| M00.8 Arthritis and polyarthritis due.. | <5            | <0.01         |
| M01.3 Arthritis in other bacterial di.. | <5            | <0.01         |
| M46.5 Other infective spondylopathies   | <5            | <0.01         |
| M49.3 Spondylopathy in other infectio.. | <5            | <0.01         |
| M63.0 Myositis in bacterial diseases .. | <5            | <0.01         |
| M86.3 Chronic multifocal osteomyelitis  | <5            | <0.01         |
| M86.4 Chronic osteomyelitis with drai.. | <5            | <0.01         |
| N16.0 Renal tubulo-interstitial disor.. | <5            | <0.01         |
| O23.2 Infections of urethra in pregna.. | <5            | <0.01         |
| O23.3 Infections of other parts of ur.. | <5            | <0.01         |
| O98.6 Protozoal diseases complicating.. | <5            | <0.01         |
| P36.9 Bacterial sepsis of newborn, un.. | <5            | <0.01         |
| P37.9 Congenital infectious and paras.. | <5            | <0.01         |
| P39.0 Neonatal infective mastitis       | <5            | <0.01         |
| P39.1 Neonatal conjunctivitis and dac.. | <5            | <0.01         |
| P39.9 Infection specific to the perin.. | <5            | <0.01         |
| R57.2 Septic shock                      | <5            | <0.01         |
| <b>Total</b>                            | <b>71 030</b> | <b>100.00</b> |

### eMethods 3. Stata code for data analysis

version 16

\*\*\*\* PRIMARY ANALYSIS (FINNISH MULTICOHORT SAMPLE) \*\*\*\*

capture log close

log using "Jakauma-datan luominen.log", append

\*Create the indicator variables for start of follow up for each infectious disease

use "Pooled infections\_trimmattu", clear

\*Random order

\*seed from random.org from range 1 - 1 000 000 000

set rng mt64s

set rngstream 1

set seed 141476928

gen double shuffle1 = runiform()

gen double shuffle2 = runiform()

sort shuffle1 shuffle2

\*New id that is in the random order

gen shuffle\_id = \_n

\*Difference between entry and time of infection

gen entry\_to\_inf = (ensianyinfpvm-entrypvm)/365.25

replace entry\_to\_inf = 0 if entry\_to\_inf < 0

bysort cohort supu: sum entry\_to\_inf if entry\_to\_inf > 0

\*hist entry\_to\_inf

sum entry\_to\_inf

capture drop entry\_to\_inf\_cut

egen entry\_to\_inf\_cut = cut(entry\_to\_inf), at(0 0.0009765625 5(5)20 100)

tab entry\_to\_inf\_cut

by cohort supu: tab entry\_to\_inf\_cut

capture drop age\_cut

egen age\_cut = cut(age), at(18 30(10)60 100)

tab age\_cut

bysort cohort supu age\_cut: tab entry\_to\_inf\_cut

levelsof cohort, local(cohorts)

levelsof age\_cut, local(age\_groups)

levelsof supu, local(sexes)

levelsof entry\_to\_inf\_cut, local(entry\_lags)

local i 0

foreach cohort of local cohorts {

    foreach age of local age\_groups {

        foreach sex of local sexes {

            local i 0

            foreach lag of local entry\_lags {

                local ++i

```

& supu=='sex' & entry_to_inf_cut=='lag'

quietly: sum entry_to_inf if cohort=='cohort' & age_cut=='age'

if `i'==1 & `r(N)' == 0 {
matrix mean_lag_`cohort'_'age'_'sex' = 0
}
else if `i'==1 {
matrix mean_lag_`cohort'_'age'_'sex' = `r(mean)'
}
else if `r(N)' == 0 {
matrix mean_lag_`cohort'_'age'_'sex' =

mean_lag_`cohort'_'age'_'sex' \ 0

mean_lag_`cohort'_'age'_'sex' \ `r(mean)'

}
else {
matrix mean_lag_`cohort'_'age'_'sex' =

}
}
matrix list mean_lag_`cohort'_'age'_'sex'

}
}
}

```

\*Start of follow up when the infection occurred more than 10 years before dementia

```

gen entry_to_inf_10y = 10 + (ensianyinfpvm-entrypvm)/365.25
replace entry_to_inf_10y = 0 if entry_to_inf_10y < 0
*hist entry_to_inf_10y
sum entry_to_inf_10y
capture drop entry_to_inf_10y_cut
egen entry_to_inf_10y_cut = cut(entry_to_inf_10y), at(0 0.0009765625 5(5)30 100)
tab entry_to_inf_10y_cut
sum entry_to_inf_10y if entry_to_inf_10y_cut==0

```

```

levelsof cohort, local(cohorts)
levelsof age_cut, local(age_groups)
levelsof supu, local(sexes)
levelsof entry_to_inf_10y_cut, local(entry_lags)
local i 0
foreach cohort of local cohorts {
    foreach age of local age_groups {
        foreach sex of local sexes {
            local i 0
            foreach lag of local entry_lags {
                local ++i

                quietly: sum entry_to_inf_10y if cohort=='cohort' &
age_cut=='age' & supu=='sex' & entry_to_inf_10y_cut=='lag'

```

```

if `i'==1 & `r(N)' == 0 {
matrix mean_lag_10y_`cohort'_'age'_'sex' = 0
}
else if `i'==1 {
matrix mean_lag_10y_`cohort'_'age'_'sex' = `r(mean)'
}
else if `r(N)' == 0 {
matrix mean_lag_10y_`cohort'_'age'_'sex' =

mean_lag_10y_`cohort'_'age'_'sex' \ 0

```

```

}
else {
matrix mean_lag_10y_`cohort'`age'`sex' =
}
}
matrix list mean_lag_10y_`cohort'`age'`sex'
}
}
}

mean_lag_10y_`cohort'`age'`sex' \ `r(mean)'

*Return random order
capture drop sub_order
bysort cohort age_cut supu anyanyinf (shuffle1 shuffle2): gen sub_order = _n

*Similar distribution of delays in start of follow up for those not exposed to infections
capture drop entry_lag
gen entry_lag = .
levelsof cohort, local(cohorts)
levelsof age_cut, local(age_groups)
levelsof supu, local(sexes)
levelsof entry_to_inf_cut, local(entry_lags)
foreach cohort of local cohorts {
    foreach age of local age_groups {
        foreach sex of local sexes {
            local i 0
            local cum = 0
            sum id if cohort==`cohort' & age_cut==`age' & supu==`sex' & anyanyinf==0

            local N_control = `r(N)'
            sum entry_to_inf_cut if cohort==`cohort' & age_cut==`age' & supu==`sex' &
anyanyinf==1

            local N_`cohort'`age'`sex' = `r(N)'
            foreach lag of local entry_lags {
                di "cohort `cohort', age_group `age', sex `sex'"
                local ++i
                di `i'
                sum entry_to_inf_cut if cohort==`cohort' & age_cut==`age' &
supu==`sex' & anyanyinf==1 & entry_to_inf_cut==`lag'

                local cum = `cum' + `r(N)'
                di `cum'
                di `N_`cohort'`age'`sex'"
                di `N_control'
                di mean_lag_`cohort'`age'`sex'[`i',1]
                replace entry_lag = mean_lag_`cohort'`age'`sex'[`i',1] if
cohort==`cohort' & age_cut==`age' & supu==`sex' & anyanyinf==0 & entry_lag==. & sub_order <= round((`cum' /
`N_`cohort'`age'`sex')*`N_control')
            }
            replace entry_lag = 0 if `N_`cohort'`age'`sex'==0 &
entry_lag==. & anyanyinf==0 & cohort==`cohort' & supu==`sex'
        }
    }
}

```

```

*Delays for the 10y exclusion analysis
capture drop entry_lag_10y
gen entry_lag_10y = .

```

```

levelsof cohort, local(cohorts)
levelsof age_cut, local(age_groups)
levelsof supu, local(sexes)
levelsof entry_to_inf_10y_cut, local(entry_lags)
foreach cohort of local cohorts {
    foreach age of local age_groups {
        foreach sex of local sexes {
            local i 0
            local cum = 0
            sum id if cohort==`cohort' & age_cut==`age' & supu==`sex' & anyanyinf==0

            local N_control = `r(N)'
            sum entry_to_inf_10y_cut if cohort==`cohort' & age_cut==`age' & supu==`sex'
& anyanyinf==1

            local N_`cohort'`_`age'`_`sex' = `r(N)'
            foreach lag of local entry_lags {
                di "cohort `cohort', age_group `age', sex `sex'"
                local ++i
                di `i'
                sum entry_to_inf_10y_cut if cohort==`cohort' & age_cut==`age'
& supu==`sex' & anyanyinf==1 & entry_to_inf_10y_cut==`lag'

                local cum = `cum' + `r(N)'
                di `cum'
                di `N_`cohort'`_`age'`_`sex'"
                di `N_control'
                di mean_lag_10y_`cohort'`_`age'`_`sex'[`i',1]
                replace entry_lag_10y =
mean_lag_10y_`cohort'`_`age'`_`sex'[`i',1] if cohort==`cohort' & age_cut==`age' & supu==`sex' & anyanyinf==0 &
entry_lag_10y==. & sub_order <= round((`cum' / `N_`cohort'`_`age'`_`sex')*`N_control')
                }
                replace entry_lag_10y = 0 if `N_`cohort'`_`age'`_`sex'==0 &
entry_lag_10y==. & anyanyinf==0 & cohort==`cohort' & supu==`sex'
                }
            }
        }
    }
}

```

\* Check that the distribution are correct:

```

sum entry_to_inf_10y
sum entry_lag_10y
levelsof cohort, local(cohorts)
levelsof age_cut, local(age_groups)
levelsof supu, local(sexes)
levelsof entry_to_inf_10y_cut, local(entry_lags)
foreach cohort of local cohorts {
    foreach age of local age_groups {
        foreach sex of local sexes {
            sum entry_to_inf if cohort==`cohort' & age_cut==`age' & supu==`sex'
            sum entry_lag if cohort==`cohort' & age_cut==`age' & supu==`sex'
            sum entry_to_inf_10y if cohort==`cohort' & age_cut==`age' & supu==`sex'
            sum entry_lag_10y if cohort==`cohort' & age_cut==`age' & supu==`sex'
            }
        }
    }
}

```

save "jakauma.dta", replace

```

use "jakauma.dta", clear
*Update the infection variables so that they are coded missing if the participant does not have the index infection but has some
other infection
local dg anyinf bactinf sysbact localbact bactsepsis bact_nonsepsis extrac intrac gramplus gramminus viralinf herpes persviral
acuteviral
foreach idg of local dg {
    tab any`idg'
    replace any`idg' = . if anyanyinf==1 & any`idg'==0
    tab any`idg'

    egen lag_entry_`idg' = rowmax(entrypvm ensi`idg'pvm) if any`idg'==1
    replace lag_entry_`idg' = entrypvm + round(entry_lag*365.25) if any`idg'==0
    capture drop ensi`idg'pvm_10y
    gen ensi`idg'pvm_10y = ensi`idg'pvm + round(10*365.25)
    egen lag_entry_10y_`idg' = rowmax(entrypvm ensi`idg'pvm_10y) if any`idg'==1
    replace lag_entry_10y_`idg' = entrypvm + round(entry_lag_10y*365.25) if any`idg'==0
}

save "Inf_dem_lag.dta", replace

```

\*\*\*\*\* Descriptive analysis and definition of variables \*\*\*\*\*

```

use "Inf_dem_lag.dta", replace

```

\*Katsotaan eri infektioiden määrät

```

tab anyanyinf

```

```

tab anybactinf

```

```

tab anysysbact
tab anylocalbact

```

```

tab anybactsepsis
tab anybact_nonsepsi

```

```

tab anyextrac
tab anyintrac

```

```

tab anygramplus
tab anygramminus
tab anymycobact
tab anymycoplasma

```

```

tab anyviralinf
tab anyherpes
tab anypersviral
tab anyacuteviral

```

```

tab anyparasite
tab anymycose

```

\*Piirretään histogrammi dementiaan iästä

```

stset exitpvm, id(id) failure(ensidementia) origin(time syntpvm) enter(time lag_entry_anyinf) scale(365.25)

```

```

egen latedementia = cut(_t), at(0,65,100), if _d==1
tab latedementia

```



```

gen dementia_age = int(_t)+0.5 if _d==1
histogram dementia_age, disc scheme(s1color) freq ///
    ysize(7.8) xsize(8.27) ///
    title(" ", size(medsmall) color(black)) ///
    graphregion(color(white)) ///
    xtitle("Age (years)", size(medsmall) color(black)) ///
    ytitle("Dementias, No.", size(medsmall) color(black))
graph export "eFigure4_new.emf", as(emf) replace
graph export "eFigure4_new.pdf", as(pdf) replace

```

```

use "Inf_dem_lag.dta", replace
merge 1:1 id using "Parkinson.dta"
keep if _merge==3
drop _merge

```

```

stset exitpvm, id(id) failure(ensidementia) origin(time syntpvm) enter(time lag_entry_anyinf) scale(365.25)
keep if _st==1
count
count if ensidementia==1

```

```

label define supu 1"Men" 2"Women"
label values supu supu
label values diabetes yesno
label values hypertensio yesno
recode ensidementia . = 0
label values ensidementia yesno

```

```

gen followup = _t- _t0

```

```

drop age
gen age = (lag_entry_anyinf - syntpvm)/365.25
egen age_cat = cut(age), at(18,40,50,60,100)
tab age_cat

```

```

label define alcocl 0 "Non-drinker" 1 "Moderate" 2 "Intermediate" 3 "Heavy"
label values alcocl alcocl

```

```

foreach cm in hypert diabetes ihd cereb parkinson {
    gen `cm'_entry = `cm'_combpvm <= lag_entry_anyinf
    tab `cm'_entry
}

```

```

gen age_at_dementia = _t if _d==1

```

```

keep if _st==1
keep if anyanyinf!=.

```

```

baselinetable ///
age_cat(novarlabel afterhead("Age at entry, years")) ///
supu(novarlabel afterhead("Sex")) ///
ses(novarlabel afterhead("Education/Socioeconomic status")) ///
hypert_entry(novarlabel afterhead("Hypertension")) ///
diabetes_entry(novarlabel afterhead("Diabetes mellitus")) ///
ihd_entry(novarlabel afterhead("Ischaemic heart disease")) ///
cereb_entry(novarlabel afterhead("Cerebrovascular disease")) ///

```

```

parkinson_entry(novarlabel afterhead("Parkinson's disease")) ///
tupakka(novarlabel afterhead("Smoking status")) ///
alcocl(novarlabel afterhead("Alcohol drinking")) ///
followup(cts novarlabel afterhead("Follow-up, median (IQR), years")) ///
ensidementia (novarlabel afterhead("Dementia")) ///
age_at_dementia(cts novarlabel afterhead("Age at dementia, median (IQR), years")) ///
, by(cohort, total) ctsvartab(p50 (p25-p75)) missing ///
exportexcel(eTable_3, cell(A6) replace)

```

```

tab ensidementia // byte %8.0g any dementia diagnosis (yes/no)
tab dementiatyyppi //
type of dementia
sum anydementiapvm // int %9.0g date of first dementia diagnosis

tab anyanyinf // byte %8.0g yesno Hospitalisation for any infectious disease

tab anybactinf // byte %8.0g yesno Hospitalisation for any bacterial infection

tab anysysbact // byte %8.0g yesno Hospitalisation for any potentially invasive bacterial infections
tab anylocalbact // byte %8.0g yesno Hospitalisation for any localised bacterial infection

tab anygramplus // byte %8.0g yesno Hospitalisation for any Gram-positive bacterial infection

tab anygramminus // byte %8.0g yesno Hospitalisation for any Gram-negative bacterial infection

tab anymycobact // byte %8.0g yesno Hospitalisation for any mycobacterial infection

tab anymycoplasma // byte %8.0g yesno Hospitalisation for any mycoplasma infection

tab anyextrac // byte %8.0g yesno Hospitalisation for any extracellular bacterial infection
tab anyintrac // byte %8.0g yesno Hospitalisation for any intracellular bacterial infection

tab anyviralinf // byte %8.0g yesno Hospitalisation for any viral infection

tab anyacuteviral // byte %8.0g yesno Hospitalisation for any acute viral infection
tab anyherpes // byte %8.0g yesno Hospitalisation for any herpesvirus infection
tab anypersviral // byte %8.0g yesno Hospitalisation for any potentially persistent viral infection (excluding herpesvirus
infections)

tab anyparasite // byte %8.0g yesno Hospitalisation for any parasitic infection

tab anymycose // byte %8.0g yesno Hospitalisation for any fungal infection (mycosis)

tab anybactsepsis // byte %8.0g yesno Hospitalisation for bacterial infection with sepsis
tab anybact_nonsepsis // byte %8.0g yesno Hospitalisation for bacterial infection without sepsis

```

\*For all categories of infections listed above, there exists a variable for the date of first hospitalisation for an infection in that category.

\*The variable is named "ensi(name\_of\_disease)pvm" where "name\_of\_disease" is that of the variable above when the prefix "any" is removed.

```

tab anyhiv //
Known HIV (yes/no)

sum entrypvm //
date of entry to cohort

sum exitpvm //
date of end of follow-up

```

```

sum syntpvm      //
                 date of birth

tab ses          //
                 socioeconomic status (low, intermediate, high)

tab supu        //
                 sex (man/woman)

tab alcocl      //
                 alcohol drinking (no, light, moderate, heavy)

tab tupakka     //
                 smoking (never, ex, current)

tab bmi_who     //
                 body mass index (normal weight, overweight, obese)

sum hypert_combpvm //
                 date of hypertension diagnosis

sum diabetes_combpvm //
                 date of diabetes diagnosis

sum ihd_combpvm //
                 date of ischaemic heart disease diagnosis

sum cereb_combpvm //
                 date of cerebrovascular disease diagnosis

sum parkinson_combpvm //
                 date of cerebrovascular disease diagnosis

```

\*\*\* PRIMARY ANALYSES USING THREE FINNISH COHORTS \*\*\*

\*Incidence of infections

```

capture log close
log using "Incidence of infections and dementia.log", replace

use "Inf_dem_lag.dta", clear
stset exitpvm, id(id) failure(ensidementia) origin(time syntpvm) enter(time lag_entry_anyinf) scale(365.25)
keep if _st==1
gen inf_at_entry = ensianyinfpvm<=entrypvm
tab inf_at_entry
gen byte inf_at_fu = ensianyinfpvm<exitpvm & inf_at_entry==0
tab inf_at_fu
egen infexit = rowmin(ensianyinfpvm exitpvm)
stset infexit, id(id) failure(inf_at_fu) origin(time syntpvm) enter(time entrypvm) scale(365.25)
stptime, per(100000)
*seed from random.org from range 1 - 1 000 000 000
set seed 519750045
preserve
drop if _st!=1
bootstrap incidence = r(rate), reps(1000) strata(cohort): stptime, per(100000)
estat bootstrap, all
*Percentile-based confidence intervals were reported in the manuscript.
restore

```

```

capture log close
log using "FIGURE 2 dist.log", replace

```

\*FIGURE 2.

```

use "Inf_dem_lag.dta", clear

```

```

local dg anyinf bactinf sysbact localbact bactsepsis bact_nonsepsis extrac intrac gramplus gramminus viralinf herpes persviral
acuteviral
local row 7 10 13 14 16 17 20 21 24 25 28 31 32 33
local n_dg: word count `dg'
local dg_name ""Any infectious disease vs no infection" "Any bacterial infection vs no infection" "Potentially invasive bacterial
infection vs no infection" "Localised bacterial infection vs no infection" "Bacterial infection with sepsis vs no infection"
"Bacterial infection without sepsis vs no infection" "Extracellular bacterial infection vs no infection" "Intracellular bacterial
infection vs no infection" "Gram-positive bacterial infection vs no infection" "Gram-negative bacterial infection vs no infection"
"Any viral infection vs no infection" "Herpesvirus (persistent) infection vs no infection" "Other persistent viral infection vs no
infection" "Acute viral infection vs no infection""
forvalues i=1/'n_dg' {
    quietly: local idg : word `i' of `dg'
    quietly: local idg_name : word `i' of `dg_name'
    quietly: local irow : word `i' of `row'
    display ""
    display "`idg' followed by broad dementia, adjusted for sex and education and stratified by
cohort, age as time-scale"
    display ""
    display "Pooled IPD-analysis, normal model and 10-year exclusion"
    display ""
    display "$S_TIME $S_DATE"
    display ""

    preserve

    stset exitpvm, id(id) failure(ensidementia) origin(time syntpvm) enter(time lag_entry_`idg')
scale(365.25)

    stdescribe
    stdescribe if any`idg'==0
    stdescribe if any`idg'==1
    quietly: keep id any`idg' supu cohort exitpvm ensidementia syntpvm entrypvm ensi`idg'pvm
lag_entry_`idg' lag_entry_10y_`idg'_st_d_origin_t_t0 ses
    keep if _st==1
    tab any`idg'
    tab any`idg' ensidementia

    stcox any`idg' 2.supu#cohort 2.ses#cohort 3.ses#cohort, strata(cohort)
    quietly: matrix m = r(table)
    tempname hr ll ul
    scalar `hr' = m[1,1]
    scalar `ll' = m[5,1]
    scalar `ul' = m[6,1]
    quietly: putexcel set "Pooled results.xlsm", sheet("FIGURE 2 dist") modify
        quietly: putexcel K`irow'=(`e(N_sub)'), nformat(number)
        quietly: putexcel L`irow'=(`e(N_fail)'), nformat(number)
        quietly: putexcel E`irow'=(`hr'), nformat(number_d2)
        quietly: putexcel F`irow'=(`ll'), nformat(number_d2)
        quietly: putexcel G`irow'=(`ul'), nformat(number_d2)
        quietly: putexcel B`irow'=("`idg'")
        quietly: putexcel C`irow'=("pooled")
        quietly: putexcel D`irow'=("`idg_name'")
    tab any`idg', matcell(x), if _st==1
    matrix list x
    quietly: tab any`idg' ensidementia, matcell(y), if _d==1
    matrix list y
    quietly: putexcel set "Pooled results.xlsm", sheet("FIGURE 2 dist") modify
        quietly: putexcel M`irow'=(x[2,1]), nformat(number)

```

```

quietly: putexcel N`irow'=(y[2,1]), nformat(number)
local irow = `irow' + 29

*Dementia occurring from year 10 onwards
stset exitpvm, id(id) failure(ensidementia) origin(time syntpvm) enter(time lag_entry_10y_`idg')

scale(365.25)

stdescribe
stdescribe if any`idg'==0
stdescribe if any`idg'==1

stcox any`idg' 2.supu#cohort 2.ses#cohort 3.ses#cohort, strata(cohort)
quietly: matrix m = r(table)
scalar `hr' = m[1,1]
scalar `ll' = m[5,1]
scalar `ul' = m[6,1]
quietly: putexcel set "Pooled results.xlsx", sheet("FIGURE 2 dist") modify
quietly: putexcel K`irow'=(`e(N_sub)'), nformat(number)
quietly: putexcel L`irow'=(`e(N_fail)'), nformat(number)
quietly: putexcel E`irow'=(`hr'), nformat(number_d2)
quietly: putexcel F`irow'=(`ll'), nformat(number_d2)
quietly: putexcel G`irow'=(`ul'), nformat(number_d2)
quietly: putexcel B`irow'=("`idg'")
quietly: putexcel C`irow'=("pooled")
quietly: putexcel D`irow'=("`idg_name'")
tab any`idg', matcell(x), if _st==1
matrix list x
quietly: tab any`idg' ensidementia, matcell(y), if _d==1
matrix list y
quietly: putexcel set "Pooled results.xlsx", sheet("FIGURE 2 dist") modify
quietly: putexcel M`irow'=(x[2,1]), nformat(number)
quietly: putexcel N`irow'=(y[2,1]), nformat(number)

restore
}

log close

***Age-standardised incidence of dementia

*(Information form FIGURE 2 that goes to appendix)
capture log close
log using "FIGURE 2 append.log", replace

use "Inf_dem_lag.dta", clear

local dg anyinf bactinf sysbact localbact bactsepsis bact_nonsepsis extrac intrac gramplus gramminus viralinf herpes persviral
acuteviral
local row 7 10 13 14 16 17 20 21 24 25 28 31 32 33
local n_dg: word count `dg'
local dg_name ""Any infectious disease vs no infection" "Any bacterial infection vs no infection" "Potentially invasive bacterial
infection vs no infection" "Localised bacterial infection vs no infection" "Bacterial infection with sepsis vs no infection"
"Bacterial infection without sepsis vs no infection" "Extracellular bacterial infection vs no infection" "Intracellular bacterial
infection vs no infection" "Gram-positive bacterial infection vs no infection" "Gram-negative bacterial infection vs no infection"
"Any viral infection vs no infection" "Herpesvirus (persistent) infection vs no infection" "Other persistent viral infection vs no
infection" "Acute viral infection vs no infection""
forvalues i=1/'n_dg' {
quietly: local idg : word `i' of `dg'
quietly: local idg_name : word `i' of `dg_name'
quietly: local irow : word `i' of `row'
display ""

```

```

cohort, age as time-scale" display "`idg' followed by broad dementia, adjusted for sex and education and stratified by
display ""
display "Pooled IPD-analysis, normal model and 10-year exclusion"
display ""
display "$S_TIME $S_DATE"
display ""

if "`idg'" == "anyinf" {
stset exitpvm, id(id) failure(ensidementia) origin(time syntpvm) enter(time lag_entry_`idg')

scale(365.25)
keep if _st==1
*define scalars
tempname base_pt_18 base_pt_30 base_pt_35 base_pt_40 base_pt_45 base_pt_50
base_pt_55 base_pt_60 ///
base_pt_65 base_pt_70 base_pt_75 base_pt_80 base_pt_85
tempname base_rate_18_10y base_rate_30_10y base_rate_35_10y base_rate_40_10y
base_rate_45_10y ///
base_rate_50_10y base_rate_55_10y base_rate_60_10y base_rate_65_10y base_rate_70_10y
///
base_rate_75_10y base_rate_80_10y base_rate_85_10y
tempname inf18 inf30 inf35 inf40 inf45 inf50 inf55 inf60 inf65 inf70 inf75 inf80 inf85
tempname ptime_base incid_base stand_incid_base_10y stand_incid
stptime, per(100000), if anyanyinf==0
scalar `ptime_base' = r(ptime)
scalar `incid_base' = r(rate)
}

preserve

if "`idg'" != "anyinf" {
scale(365.25)
keep if _st==1
}

tab any`idg', matcell(x), if _st==1
matrix list x
quietly: tab any`idg' ensidementia, matcell(y), if _d==1
matrix list y
sum _st if _st==1
local N = `r(N)'
sum _d if _d==1
local failures = `r(N)'

*Store person-times and rates to scalars
stsplit age_split, at(18 30(5)85)
tab age_split
levelsof age_split, local(age_groups)
di `age_groups'
foreach age of local age_groups {
capture noisily stptime, per(100000), if age_split==`age' & anyanyinf==0
if _rc == 0 { // _rc is the return code of the command following capture. 0 means
that there was no error (e.g., due to no observations)}.
scalar `base_pt_`age' = r(ptime)
}
else {
scalar `base_pt_`age' = 0
}
}

```

```

    }
    capture noisily stptime, per(100000), if age_split==`age' & anyanyinf==1
    if _rc == 0 {
    scalar `inf`age" = r(rate)
    }
    else {
    scalar `inf`age" = 0
    }
}
*Compute age-standardised incidence rate (per 100 000 person years)
scalar `stand_incid' = (`base_pt_18'*`inf18' + `base_pt_30'*`inf30' + `base_pt_35'*`inf35' +
`base_pt_40'*`inf40' + `base_pt_45'*`inf45' ///
+ `base_pt_50'*`inf50' + `base_pt_55'*`inf55' + `base_pt_60'*`inf60' + `base_pt_65'*`inf65' +
`base_pt_70'*`inf70' + `base_pt_75'*`inf75' ///
+ `base_pt_80'*`inf80' + `base_pt_85'*`inf85') / `ptime_base'
di "Age-standardised incidence rate is " `stand_incid'

quietly: putexcel set "Pooled results.xlsx", sheet("FIGURE 2 append") modify
quietly: putexcel M`irow'=(x[2,1]), nformat(number)
quietly: putexcel N`irow'=(y[2,1]), nformat(number)
quietly: putexcel K`irow'=(`N'), nformat(number)
quietly: putexcel L`irow'=(`failures'), nformat(number)
quietly: putexcel G`irow'=(`incid_base'), nformat(number_d2)
quietly: putexcel H`irow'=(`stand_incid'), nformat(number_d2)
quietly: putexcel B`irow'=("`idg'")
quietly: putexcel C`irow'=("pooled")
quietly: putexcel D`irow'=("`idg_name'")

restore

*Dementia occurring from year 10 onwards
local irow = `irow' + 29

preserve
stset exitpvm, id(id) failure(ensidementia) origin(time syntpvm) enter(time lag_entry_10y_`idg')
scale(365.25)

keep if _st==1

tab any`idg', matcell(x), if _st==1
matrix list x
quietly: tab any`idg' ensidementia, matcell(y), if _d==1
matrix list y
sum _st if _st==1
local N = `r(N)'
sum _d if _d==1
local failures = `r(N)'

*Store person-times and rates to scalars
stsplit age_split, at(18 30(5)85)
levelsof age_split, local(age_groups)
foreach age of local age_groups {
capture noisily stptime, per(100000), if age_split==`age' & anyanyinf==1
if _rc == 0 {
scalar `inf`age" = r(rate)
}
else {
scalar `inf`age" = 0
}
}

```

```

    }

    if "`idg'" == "anyinf" {
        levelsof age_split, local(age_groups)
        foreach age of local age_groups {
            capture noisily stptime, per(100000), if age_split==`age' &
anyanyinf==0
                if _rc == 0 {
                    scalar `base_rate_`age'_10y' = r(rate)
                }
                else {
                    scalar `base_rate_`age'_10y' = 0
                }
            }
        }

        if "`idg'" == "anyinf" {
            scalar `stand_incid_base_10y' = (`base_pt_18'*`base_rate_18_10y' +
`base_pt_30'*`base_rate_30_10y' + `base_pt_35'*`base_rate_35_10y' + ///
            `base_pt_40'*`base_rate_40_10y' + `base_pt_45'*`base_rate_45_10y' +
`base_pt_50'*`base_rate_50_10y' ///
            + `base_pt_55'*`base_rate_55_10y' + `base_pt_60'*`base_rate_60_10y' +
`base_pt_65'*`base_rate_65_10y' + `base_pt_70'*`base_rate_70_10y' + ///
            `base_pt_75'*`base_rate_75_10y' + `base_pt_80'*`base_rate_80_10y' +
`base_pt_85'*`base_rate_85_10y') / `ptime_base'

            di "Age-standardised incidence for comparison group in 10-year lag analysis is "
`stand_incid_base_10y'

        }

        *Compute age-standardised incidence rate (per 100 000 person years)
        scalar `stand_incid' = (`base_pt_18'*`inf18' + `base_pt_30'*`inf30' + `base_pt_35'*`inf35' +
`base_pt_40'*`inf40' + `base_pt_45'*`inf45' ///
            + `base_pt_50'*`inf50' + `base_pt_55'*`inf55' + `base_pt_60'*`inf60' + `base_pt_65'*`inf65' +
`base_pt_70'*`inf70' + `base_pt_75'*`inf75' ///
            + `base_pt_80'*`inf80' + `base_pt_85'*`inf85') / `ptime_base'
        di "Age-standardised incidence rate is " `stand_incid' " in 10-year lag analysis"
        quietly: putexcel set "Pooled results.xlsm", sheet("FIGURE 2 append") modify
            quietly: putexcel M`irow'=(x[2,1]), nformat(number)
            quietly: putexcel N`irow'=(y[2,1]), nformat(number)
            quietly: putexcel K`irow'=(`N'), nformat(number)
            quietly: putexcel L`irow'=(`failures'), nformat(number)
            quietly: putexcel G`irow'=(`stand_incid_base_10y'), nformat(number_d2)
            quietly: putexcel H`irow'=(`stand_incid'), nformat(number_d2)
            quietly: putexcel B`irow'=("`idg'")
            quietly: putexcel C`irow'=("pooled")
            quietly: putexcel D`irow'=("`idg_name'")

        restore
    }

log close

*** CUMULATIVE HAZARD *****

use "Inf_dem_lag.dta", clear
stset exitpvm, id(id) failure(ensidementia) origin(time syntpvm) enter(time lag_entry_anyinf) scale(365.25)

```



```

sts graph, na by(anyanyinf) ///
title("Any infectious disease" "vs no infection" " " " ///
, size(medsmall) color(black)) xti("Age (years)") yti("Nelson-Aalen cumulative hazard estimate",
height(5)) ///

legend(order(1 "No infection" 2 "Infection")) scheme(s1color) ///
plot1opts(lcolor(blue)) plot2opts(lcolor(red)) xscale(range(18 100)) xlabel(20(20)100) ///
risktable(20 40 60 80 100, size(small) failevents order(1 "No infection" 2 "Infection") ///
title("N at risk (dementias)", justification(left) size(small)) rowtitle(, justification(left)))
graph export "age_NA_anyinf.emf", as(emf) replace

```

\*\*\*eFIGURE 8 \*\*\*\*

\*(was previously figure 3)

capture log close

log using "FIGURE 3 dist.log", replace

use "Inf\_dem\_lag.dta", clear

\*Use this first listed dementia diagnosis if there are several on the same hospitalisation (primary diagnosis instead of secondary and 1st secondary instead of 2nd secondary and so on)

drop dementiatyppi

gen dementiatyppi = 1 if dementiatyppi\_laaja=="AD"

replace dementiatyppi = 2 if inlist(dementiatyppi\_laaja,"FTD","PD","VD","other","unspecified")

local dg anyinf bactinf sysbact localbact bactsepsis bact\_nonsepsis extrac intrac gramplus gramminus viralinf herpes persviral acuteviral

local row 7 11 15 18 21 24 28 31 35 38 42 46 49 52

local n\_dg: word count `dg'

local dg\_name "" "Any infectious disease vs not" "Any bacterial infection vs not" "Potentially invasive bacterial infection vs not" "Localised bacterial infection vs not" "Bacterial infection with sepsis vs not" "Bacterial infection without sepsis vs not" "Extracellular bacterial infection vs not" "Intracellular bacterial infection vs not" "Gram-positive bacterial infection vs not" "Gram-negative bacterial infection vs not" "Any viral infection vs not" "Herpesvirus (persistent) infection vs not" "Other persistent viral infection vs not" "Acute viral infection vs not""

forvalues i=1/'n\_dg' {

quietly: local idg : word `i' of `dg'

quietly: local idg\_name : word `i' of `dg\_name'

quietly: local irow : word `i' of `row'

display ""

display ""`idg' followed by broad dementia, adjusted for sex and education and stratified by

cohort"

display ""

display "Pooled IPD-analysis, normal model and 10-year exclusion"

display ""

display "\$S\_TIME \$S\_DATE"

display ""

\*Alzheimer's disease dementia

preserve

drop if ses==.

quietly: stset exitpvm, id(id) failure(dementiatyppi == 1) origin(time syntpvm) enter(time

lag\_entry\_`idg') scale(365.25)

quietly: keep id any`idg' supu cohort exitpvm ensidementia syntpvm entrypvm ensi`idg'pvm \_st

\_d \_origin \_t \_t0 ses dementiatyppi

tab any`idg' if \_st==1

```

stcox any`idg' 2.supu#cohort 2.ses#cohort 3.ses#cohort, strata(cohort)
quietly: matrix m = r(table)
tempname hr ll ul
scalar `hr' = m[1,1]
scalar `ll' = m[5,1]
scalar `ul' = m[6,1]
quietly: putexcel set "Pooled results.xlsx", sheet("FIGURE 3 dist") modify
    quietly: putexcel K`irow'=(`e(N_sub)'), nformat(number)
    quietly: putexcel L`irow'=(`e(N_fail)'), nformat(number)
    quietly: putexcel E`irow'=(`hr'), nformat(number_d2)
    quietly: putexcel F`irow'=(`ll'), nformat(number_d2)
    quietly: putexcel G`irow'=(`ul'), nformat(number_d2)
    quietly: putexcel B`irow'=("`idg'_AD")
    quietly: putexcel C`irow'=("pooled")
    quietly: putexcel D`irow'=("`idg'_name")
tab any`idg', matcell(x), if _st==1
matrix list x
quietly: tab any`idg' ensidementia, matcell(y), if _d==1
matrix list y
quietly: putexcel set "Pooled results.xlsx", sheet("FIGURE 3 dist") modify
    quietly: putexcel M`irow'=(x[2,1]), nformat(number)
    quietly: putexcel N`irow'=(y[2,1]), nformat(number)

local ++irow
restore

*Non-Alzheimer's disease dementia
preserve
quietly: stset exitpvm, id(id) failure(dementiatyppi == 2 3 4) origin(time syntpvm) enter(time
lag_entry_`idg') scale(365.25)
quietly: keep id any`idg' supu cohort exitpvm ensidementia syntpvm entrypvm ensi`idg'pvm _st
_d _origin _t _t0 ses dementiatyppi
tab any`idg' if _st==1

stcox any`idg' 2.supu#cohort 2.ses#cohort 3.ses#cohort, strata(cohort)
quietly: matrix m = r(table)
tempname hr ll ul
scalar `hr' = m[1,1]
scalar `ll' = m[5,1]
scalar `ul' = m[6,1]
quietly: putexcel set "Pooled results.xlsx", sheet("FIGURE 3 dist") modify
    quietly: putexcel K`irow'=(`e(N_sub)'), nformat(number)
    quietly: putexcel L`irow'=(`e(N_fail)'), nformat(number)
    quietly: putexcel E`irow'=(`hr'), nformat(number_d2)
    quietly: putexcel F`irow'=(`ll'), nformat(number_d2)
    quietly: putexcel G`irow'=(`ul'), nformat(number_d2)
    quietly: putexcel B`irow'=("`idg'_nonAD")
    quietly: putexcel C`irow'=("pooled")
    quietly: putexcel D`irow'=("`idg'_name")
tab any`idg', matcell(x), if _st==1
matrix list x
quietly: tab any`idg' ensidementia, matcell(y), if _d==1
matrix list y
quietly: putexcel set "Pooled results.xlsx", sheet("FIGURE 3 dist") modify
    quietly: putexcel M`irow'=(x[2,1]), nformat(number)
    quietly: putexcel N`irow'=(y[2,1]), nformat(number)

restore
}

```

log close

\*FIGURE sensitivity, acute and chronic infections

capture log close

log using "Sensitivity, acute, chronic, coinfectionsm, dist.log", replace

local dg nonpers anypers bactviralcoinf

local n\_dg: word count `dg'

local dg\_name ""Any acute infectious disease" "Any chronic infectious disease""

```
quietly: use "Inf_dem_lag.dta", clear
merge 1:1 id using "Coinfections_trimmattu"
drop _merge
foreach idg of local dg {
    tab any`idg'
    replace any`idg' = . if any`idg'== 0 & anyanyinf == 1
    tab any`idg'
    egen lag_entry_`idg' = rowmax(lag_entry_`anyinf' ensi`idg'pvm)

    gen ensi`idg'pvm_10y = ensi`idg'pvm + round(10*365.25)
    egen lag_entry_10y_`idg' = rowmax(lag_entry_10y_`anyinf' ensi`idg'pvm_10y)
}
drop if ses==.
```

quietly: local irow = 7

```
forvalues i=1/`n_dg' {
```

```
    preserve
```

```
    quietly: local idg : word `i' of `dg'
```

```
    quietly: local idg_name : word `i' of `dg_name'
```

```
    display ""
```

```
    display ""`idg' followed by broad dementia, adjusted for sex and education and stratified by
```

cohort"

```
    display ""
```

```
    display "Pooled IPD-analysis, normal model and 10-year exclusion"
```

```
    display ""
```

```
    display "$S_TIME $S_DATE"
```

```
    display ""
```

```
quietly: stset exitpvm, id(id) failure(ensidementia) origin(time syntpvm) enter(time
```

lag\_entry\_`idg') scale(365.25)

```
quietly: keep id any`idg' supu cohort exitpvm ensidementia syntpvm entrypvm ensi`idg'pvm _st
```

\_d \_origin \_t \_t0 ses

```
tab any`idg' if _st==1
```

```
tab any`idg' ensidementia if _st==1
```

```
quietly: stdescribe
```

```
quietly: local failures = `r(N_fail)'
```

```
stcox any`idg' 2.supu#cohort 2.ses#cohort 3.ses#cohort, strata(cohort)
```

```
quietly: matrix m = r(table)
```

```
tempname hr ll ul
```

```
scalar `hr' = m[1,1]
```

```
scalar `ll' = m[5,1]
```

```
scalar `ul' = m[6,1]
```

```
quietly: putexcel set "Pooled results.xlsm", sheet("FIGURE sensitivity dist") modify
```

```
    quietly: putexcel K`irow'=(`e(N_sub)'), nformat(number)
```

```
    quietly: putexcel L`irow'=(`e(N_fail)'), nformat(number)
```

```
    quietly: putexcel E`irow'=(`hr'), nformat(number_d2)
```

```
    quietly: putexcel F`irow'=(`ll'), nformat(number_d2)
```

```

quietly: putexcel G`irow'=(`ul'), nformat(number_d2)
quietly: putexcel B`irow'=("`idg'")
quietly: putexcel C`irow'=("pooled")
quietly: putexcel D`irow'=("`idg_name'")
tab any`idg', matcell(x), if _st==1
matrix list x
quietly: tab any`idg' ensidementia, matcell(y), if _d==1
matrix list y
quietly: putexcel set "Pooled results.xlsx", sheet("FIGURE sensitivity dist") modify
quietly: putexcel M`irow'=(x[2,1]), nformat(number)
quietly: putexcel N`irow'=(y[2,1]), nformat(number)

local ++irow
restore

*Dementia occurring from year 10 onwards
preserve
quietly: stset exitpvm, id(id) failure(ensidementia) origin(time syntpvm) enter(time
lag_entry_10y_`idg') scale(365.25)
quietly: keep id any`idg' supu cohort exitpvm ensidementia syntpvm entrypvm ensi`idg'pvm _st
_d_origin_t_t0 ses

tab any`idg' if _st==1
tab any`idg' ensidementia if _st==1

quietly: stdescribe
quietly: local failures = `r(N_fail)'
stcox any`idg' 2.supu#cohort 2.ses#cohort 3.ses#cohort, strata(cohort)
quietly: matrix m = r(table)
scalar `hr' = m[1,1]
scalar `ll' = m[5,1]
scalar `ul' = m[6,1]
quietly: putexcel set "Pooled results.xlsx", sheet("FIGURE sensitivity dist") modify
quietly: putexcel K`irow'=(`e(N_sub)'), nformat(number)
quietly: putexcel L`irow'=(`e(N_fail)'), nformat(number)
quietly: putexcel E`irow'=(`hr'), nformat(number_d2)
quietly: putexcel F`irow'=(`ll'), nformat(number_d2)
quietly: putexcel G`irow'=(`ul'), nformat(number_d2)
quietly: putexcel B`irow'=("`idg'_10y_exclusion")
quietly: putexcel C`irow'=("pooled")
quietly: putexcel D`irow'=(" Dementia occurring more than 10 years after the
hospitalisation")

tab any`idg', matcell(x), if _st==1
matrix list x
quietly: tab any`idg' ensidementia, matcell(y), if _d==1
matrix list y
quietly: putexcel set "Pooled results.xlsx", sheet("FIGURE sensitivity dist") modify
quietly: putexcel M`irow'=(x[2,1]), nformat(number)
quietly: putexcel N`irow'=(y[2,1]), nformat(number)

local ++irow
local ++irow
restore
}

```

log close

\*\*\*\*\* SINGLE VS MULTIPLE INFECTIONS \*\*\*\*\*

```

capture log close
log using "Single vs multiple infections.log", replace

local dg_name `"'Multiple infections'"`
local irow 16
local prow = `irow'

quietly: use "Inf_dem_lag.dta", clear
merge 1:1 id using "Coinfections_trimmattu"
drop _merge
drop if ses==.
egen lag_entry_multiinf = rowmax(lag_entry_anyinf ensitoinenanyinfpvm ensikolmasanyinfpvm)
egen multiinfpvm = rowmax(ensianyinfpvm ensitoinenanyinfpvm ensikolmasanyinfpvm)
gen multiinfpvm_10y = multiinfpvm +round(10*365.25)
egen lag_entry_10y_multiinf = rowmax(lag_entry_10y_anyinf multiinfpvm_10y)

preserve
quietly: stset exitpvm, id(id) failure(ensidementia) origin(time syntpvm) enter(time
lag_entry_multiinf) scale(365.25)
keep if _st==1
quietly: keep id anyanyinf supu cohort exitpvm ensidementia syntpvm entrypvm
ensy*anyinfpvm *toinen* *kolmas* _st_d_origin_t_t0 ses
sum ensy*anyinfpvm

gen byte multiinf = 0
tab multiinf
replace multiinf = 1 if anyanyinf==1
tab multiinf
replace multiinf = 2 if ensitoinenanyinfpvm!=.
replace multiinf = 3 if ensikolmasanyinfpvm!=.
tab multiinf

quietly: stdescribe
quietly: local failures = `r(N_fail)'
tempname hr1 ll1 ul1 hr2 ll2 ul2 hr3 ll3 ul3 N1 N2 N3 fail1 fail2 fail3
forvalues i =1/3 {
stcox i.multiinf 2.supu#cohort 2.ses#cohort 3.ses#cohort, strata(cohort), if inlist(multiinf,0,`i')
quietly: matrix m = r(table)
matrix list m
scalar `N`i' = e(N_sub)
scalar `fail`i' = e(N_fail)
scalar `hr`i' = m[1,2]
scalar `ll`i' = m[5,2]
scalar `ul`i' = m[6,2]
}

forvalues i =1/3 {
quietly: putexcel set "Pooled results.xlsm", sheet("FIGURE sensitivity dist") modify
quietly: putexcel K`irow'=(`N`i'), nformat(number)
quietly: putexcel L`irow'=(`fail`i'), nformat(number)
quietly: putexcel E`irow'=(`hr`i'), nformat(number_d2)
quietly: putexcel F`irow'=(`ll`i'), nformat(number_d2)
quietly: putexcel G`irow'=(`ul`i'), nformat(number_d2)
quietly: putexcel B`irow'=("Multiinf")
quietly: putexcel C`irow'=("pooled")
quietly: putexcel D`irow'=("Single vs multiple infections, infection No. `i'")
tab multiinf, matcell(x), if inlist(multiinf,0,`i') & _st==1
matrix list x

```

```

tab multiinf ensidementia, matcell(y), if inlist(multiinf,0,'i') & _d==1
matrix list y
quietly: putexcel set "Pooled results.xlsm", sheet("FIGURE sensitivity dist") modify
               quietly: putexcel M`irow'=(x[2,1]), nformat(number)
               quietly: putexcel N`irow'=(y[2,1]), nformat(number)

local ++irow
local ++irow
}
*P for trend
stcox multiinf 2.supu#cohort 2.ses#cohort 3.ses#cohort, strata(cohort)
quietly: matrix n = r(table)
matrix list n
tempname p
scalar `p' = n[4,1]
quietly: putexcel set "Pooled results.xlsm", sheet("FIGURE sensitivity dist") modify
               quietly: putexcel Q`prow'=(`p'), nformat(number)

restore

*Dementia occurring from year 10 onwards
preserve
quietly: stset exitpvm, id(id) failure(ensidementia) origin(time syntpvm) enter(time
lag_entry_10y_multiinf) scale(365.25)
keep if _st==1
quietly: keep id anyanyinf supu cohort exitpvm ensidementia syntpvm entrypvm
ensy*anyinfpvm *toinen* *kolmas* _st_d_origin_t_t0 ses
sum ensy*anyinfpvm

gen byte multiinf = 0
tab multiinf
replace multiinf = 1 if anyanyinf==1
tab multiinf
replace multiinf = 2 if ensitoinenanyinfpvm!=.
replace multiinf = 3 if ensikolmasanyinfpvm!=.
tab multiinf

quietly: stdescribe
quietly: local failures = `r(N_fail)'
tempname hr ll ul hr2 ll2 ul2 hr3 ll3 ul3 N1 N2 N3 fail1 fail2 fail3
forvalues i =1/3 {
stcox i.multiinf 2.supu#cohort 2.ses#cohort 3.ses#cohort, strata(cohort), if inlist(multiinf,0,'i')
quietly: matrix m = r(table)
matrix list m
scalar `N`i'" = e(N_sub)
scalar `fail`i'" = e(N_fail)
scalar `hr`i'" = m[1,2]
scalar `ll`i'" = m[5,2]
scalar `ul`i'" = m[6,2]
}

local irow 17
forvalues i =1/3 {
quietly: putexcel set "Pooled results.xlsm", sheet("FIGURE sensitivity dist") modify
               quietly: putexcel K`irow'=(`N`i'), nformat(number)
               quietly: putexcel L`irow'=(`fail`i'), nformat(number)
               quietly: putexcel E`irow'=(`hr`i'), nformat(number_d2)
               quietly: putexcel F`irow'=(`ll`i'), nformat(number_d2)
               quietly: putexcel G`irow'=(`ul`i'), nformat(number_d2)
               quietly: putexcel B`irow'=("Multiinf")

```

```

quietly: putexcel C`irow'=("pooled")
quietly: putexcel D`irow'=("10-year lag, single vs multiple infections, infection

No. `i'")

tab multiinf, matcell(x), if inlist(multiinf,0,`i') & _st==1
matrix list x
tab multiinf ensidementia, matcell(y), if inlist(multiinf,0,`i') & _d==1
matrix list y
quietly: putexcel set "Pooled results.xlsx", sheet("FIGURE sensitivity dist") modify
quietly: putexcel M`irow'=(x[2,1]), nformat(number)
quietly: putexcel N`irow'=(y[2,1]), nformat(number)

local ++irow
local ++irow
}

*P for trend
stcox multiinf 2.supu#cohort 2.ses#cohort 3.ses#cohort, strata(cohort)
quietly: matrix n = r(table)
matrix list n
tempname p
scalar `p' = n[4,1]
quietly: putexcel set "Pooled results.xlsx", sheet("FIGURE sensitivity dist") modify
quietly: putexcel Q`prow'=(`p'), nformat(number)

restore

log close

***** One or several different pathogens *****

capture log close
log using "One vs at least two different pathogens.log", replace

local dg_name `""Multiple organisms""'
local irow 82
local prow = `irow'

quietly: use "Inf_dem_lag.dta", clear
drop if ses==.
egen ensibactviralpvm = rowmin(ensibactinfpvm ensiviralinfpvm)
gen toinenbactviralpvm = ensibactviralpvm if ensibactinfpvm==ensiviralinfpvm &
ensibactinfpvm!=.
replace toinenbactviralpvm = ensibactinfpvm if ensibactinfpvm>ensiviralinfpvm &
ensibactinfpvm!=.
replace toinenbactviralpvm = ensiviralinfpvm if ensiviralinfpvm>ensibactinfpvm &
ensiviralinfpvm!=.
gen anybactviral = 1 if ensibactviralpvm!=.
gen toinenbactviral = 1 if toinenbactviralpvm!=.
egen lag_entry_bactviral = rowmax(lag_entry_anyinf ensibactviralpvm toinenbactviralpvm)
gen ensibactviralpvm_10y = ensibactviralpvm + round(10*365.25)
gen toinenbactviralpvm_10y = toinenbactviralpvm + round(10*365.25)
egen lag_entry_10y_bactviral = rowmax(lag_entry_10y_anyinf ensibactviralpvm_10y
toinenbactviralpvm_10y)

preserve
quietly: stset exitpvm, id(id) failure(ensidementia) origin(time syntpvm) enter(time
lag_entry_bactviral) scale(365.25)
quietly: keep id anybactviral supu cohort exitpvm ensidementia syntpvm entrypvm ensi*pvm
*toinen* _st _d _origin _t _t0 ses anyanyinf
sum ensibactviralpvm toinenbactviralpvm

```

```

tab anybactviral if _st==1
tab toinenbactviral if _st==1

gen byte multiinf = 0 if anyanyinf==0
tab multiinf
tab multiinf if _st==1
replace multiinf = 1 if anybactviral==1
tab multiinf
tab multiinf if _st==1
replace multiinf = 2 if toinenbactviral==1
tab multiinf
tab multiinf if _st==1
*browse id ensibactviralpvm toinenbactviralpvm multiinf _t0 _t

quietly: stdescribe
stcox i.multiinf 2.supu#cohort 2.ses#cohort 3.ses#cohort, strata(cohort), if multiinf!=2
quietly: matrix m = r(table)
matrix list m
tempname hr1 ll1 ul1 hr2 ll2 ul2 N1 fail1 N2 fail2
scalar `hr1' = m[1,2]
scalar `ll1' = m[5,2]
scalar `ul1' = m[6,2]
scalar `N1' = e(N_sub)
scalar `fail1' = e(N_fail)
stcox i.multiinf 2.supu#cohort 2.ses#cohort 3.ses#cohort, strata(cohort), if multiinf!=1
quietly: matrix m = r(table)
matrix list m
scalar `hr2' = m[1,2]
scalar `ll2' = m[5,2]
scalar `ul2' = m[6,2]
scalar `N2' = e(N_sub)
scalar `fail2' = e(N_fail)

forvalues i =1/2 {
quietly: putexcel set "Pooled results.xlsm", sheet("FIGURE sensitivity dist") modify
quietly: putexcel K`irow'=(`N`i'), nformat(number)
quietly: putexcel L`irow'=(`fail`i'), nformat(number)
quietly: putexcel E`irow'=(`hr`i'), nformat(number_d2)
quietly: putexcel F`irow'=(`ll`i'), nformat(number_d2)
quietly: putexcel G`irow'=(`ul`i'), nformat(number_d2)
quietly: putexcel B`irow'=("`idg_name`")
quietly: putexcel C`irow'=("pooled")
quietly: putexcel D`irow'=("Different micro-organisms, infection No. `i'")
tab multiinf, matcell(x), if _st==1 & inlist(multiinf,0,`i')
matrix list x
tab multiinf ensidementia, matcell(y), if _d==1 & inlist(multiinf,0,`i')
matrix list y
quietly: putexcel set "Pooled results.xlsm", sheet("FIGURE sensitivity dist") modify
local j = `i' + 1
quietly: putexcel M`irow'=(x[2,1]), nformat(number)
quietly: putexcel N`irow'=(y[2,1]), nformat(number)

local ++irow
local ++irow
}
*P for trend
stcox multiinf 2.supu#cohort 2.ses#cohort 3.ses#cohort, strata(cohort)
quietly: matrix n = r(table)
matrix list n

```



```

tempname p
scalar `p' = n[4,1]
quietly: putexcel set "Pooled results.xlsm", sheet("FIGURE sensitivity dist") modify
               quietly: putexcel Q`prow'=(`p'), nformat(number)
restore

*Dementia occurring from year 10 onwards
local i 1
preserve
quietly: stset exitpvm, id(id) failure(ensidementia) origin(time syntpvm) enter(time
lag_entry_10y_bactviral) scale(365.25)
               quietly: keep id anybactviral supu cohort exitpvm ensidementia syntpvm entrypvm ensi*pvm
*toinen* _st_d_origin_t_t0 ses anyanyinf
sum ensibactviralpvm toinenbactviralpvm
tab anybactviral if _st==1
tab toinenbactviral if _st==1

gen byte multiinf = 0 if anyanyinf==0
tab multiinf
tab multiinf if _st==1
replace multiinf = 1 if anybactviral==1
tab multiinf
tab multiinf if _st==1
replace multiinf = 2 if toinenbactviral==1
tab multiinf
tab multiinf if _st==1
*browse id ensibactviralpvm toinenbactviralpvm multiinf _t0 _t

quietly: stdescribe
quietly: local failures = `r(N_fail)'
stcox i.multiinf 2.supu#cohort 2.ses#cohort 3.ses#cohort, strata(cohort), if multiinf!=2
quietly: matrix m = r(table)
matrix list m
tempname hr1 ll1 ul1 hr2 ll2 ul2 N1 fail1 N2 fail2
scalar `hr1' = m[1,2]
scalar `ll1' = m[5,2]
scalar `ul1' = m[6,2]
scalar `N1' = e(N_sub)
scalar `fail1' = e(N_fail)
stcox i.multiinf 2.supu#cohort 2.ses#cohort 3.ses#cohort, strata(cohort), if multiinf!=1
quietly: matrix m = r(table)
matrix list m
scalar `hr2' = m[1,2]
scalar `ll2' = m[5,2]
scalar `ul2' = m[6,2]
scalar `N2' = e(N_sub)
scalar `fail2' = e(N_fail)

forvalues i =1/2 {
quietly: putexcel set "Pooled results.xlsm", sheet("FIGURE sensitivity dist") modify
               quietly: putexcel K`irow'=(`N`i'), nformat(number)
               quietly: putexcel L`irow'=(`fail`i'), nformat(number)
               quietly: putexcel E`irow'=(`hr`i'), nformat(number_d2)
               quietly: putexcel F`irow'=(`ll`i'), nformat(number_d2)
               quietly: putexcel G`irow'=(`ul`i'), nformat(number_d2)
               quietly: putexcel B`irow'=("`idg_name`")
               quietly: putexcel C`irow'=("pooled")

```

```

quietly: putexcel D`irow'=("Different micro-organisms after 10+ years, infection
No. `i'")
tab multiinf, matcell(x), if _st==1 & inlist(multiinf,0,`i')
matrix list x
tab multiinf ensidementia, matcell(y), if _d==1 & inlist(multiinf,0,`i')
matrix list y
quietly: putexcel set "Pooled results.xlsm", sheet("FIGURE sensitivity dist") modify
    local j = `i' + 1
    quietly: putexcel M`irow'=(x[2,1]), nformat(number)
    quietly: putexcel N`irow'=(y[2,1]), nformat(number)
local ++irow
local ++irow
}
*P for trend
stcox multiinf 2.supu#cohort 2.ses#cohort 3.ses#cohort, strata(cohort)
quietly: matrix n = r(table)
matrix list n
tempname p
scalar `p' = n[4,1]
quietly: putexcel set "Pooled results.xlsm", sheet("FIGURE sensitivity dist") modify
    quietly: putexcel Q`prow'=(`p'), nformat(number)
restore

```

log close

\*\*\*\*\* NUMBER OF SIMULTANEOUS INFECTIONS \*\*\*\*\*

capture log close

log using "Number of infections.log", replace

local dg infcount

local n\_dg: word count `dg'

local dg\_name ""No. of infections""

```

quietly: use "Inf_dem_lag.dta", clear
merge 1:1 id using "Infection count.dta"
tab anyinfcount
replace anyinfcount=0 if anyanyinf==0
recode anyinfcount 3=2 4=2
drop if ses==.
gen ensiinfcountpvm = ensianyinfpvm

```

quietly: local irow = 23

quietly: local prow = `irow'

forvalues i=1/`n\_dg' {

quietly: local idg : word `i' of `dg'

quietly: local idg\_name : word `i' of `dg\_name'

display ""

display "`idg' followed by broad dementia, adjusted for sex and education and stratified by

cohort"

display ""

display "Pooled IPD-analysis, normal model and 10-year exclusion"

display ""

display "\$S\_TIME \$S\_DATE"

```

display ""

preserve
quietly: stset exitpvm, id(id) failure(ensidementia) origin(time syntpvm) enter(time
lag_entry_anyinf) scale(365.25)
quietly: keep id any`idg' supu cohort exitpvm ensidementia syntpvm entrypvm ensi`idg'pvm _st
_d _origin _t _t0 ses

tab any`idg' if _st==1

quietly: stdescribe
quietly: local failures = `r(N_fail)'
stcox i.any`idg' 2.supu#cohort 2.ses#cohort 3.ses#cohort, strata(cohort), if any`idg'!=2
quietly: matrix m = r(table)
matrix list m
tempname hr1 ll1 ul1 hr2 ll2 ul2 N1 fail1 N2 fail2
scalar `hr1' = m[1,2]
scalar `ll1' = m[5,2]
scalar `ul1' = m[6,2]
scalar `N1' = e(N_sub)
scalar `fail1' = e(N_fail)
stcox i.any`idg' 2.supu#cohort 2.ses#cohort 3.ses#cohort, strata(cohort), if any`idg'!=1
quietly: matrix m = r(table)
matrix list m
scalar `hr2' = m[1,2]
scalar `ll2' = m[5,2]
scalar `ul2' = m[6,2]
scalar `N2' = e(N_sub)
scalar `fail2' = e(N_fail)

forvalues i =1/2 {
quietly: putexcel set "Pooled results.xlsm", sheet("FIGURE sensitivity dist") modify
quietly: putexcel K`irow'=(`N`i'), nformat(number)
quietly: putexcel L`irow'=(`fail`i'), nformat(number)
quietly: putexcel E`irow'=(`hr`i'), nformat(number_d2)
quietly: putexcel F`irow'=(`ll`i'), nformat(number_d2)
quietly: putexcel G`irow'=(`ul`i'), nformat(number_d2)
quietly: putexcel B`irow'=("Simultaneous infection diagnoses")
quietly: putexcel C`irow'=("pooled")
quietly: putexcel D`irow'=("No. of simultaneous infection diagnoses = `i'")
tab any`idg', matcell(x), if _st==1 & inlist(any`idg',0,`i')
matrix list x
tab any`idg' ensidementia, matcell(y), if _d==1 & inlist(any`idg',0,`i')
matrix list y
quietly: putexcel set "Pooled results.xlsm", sheet("FIGURE sensitivity dist") modify
quietly: putexcel M`irow'=(x[2,1]), nformat(number)
quietly: putexcel N`irow'=(y[2,1]), nformat(number)

local ++irow
local ++irow
}

*P for trend
stcox any`idg' 2.supu#cohort 2.ses#cohort 3.ses#cohort, strata(cohort)
quietly: matrix n = r(table)
matrix list n
tempname p
scalar `p' = n[4,1]
quietly: putexcel set "Pooled results.xlsm", sheet("FIGURE sensitivity dist") modify
quietly: putexcel Q`prow'=(`p'), nformat(number)

```

```

local irow 24
restore

*Dementia occurring from year 10 onwards
preserve
quietly: stset exitpvm, id(id) failure(ensidementia) origin(time syntpvm) enter(time
lag_entry_10y_anyinf) scale(365.25)
quietly: keep id any`idg' supu cohort exitpvm ensidementia syntpvm entrypvm ensi`idg'pvm _st
_d _origin _t _t0 ses

tab any`idg' if _st==1

quietly: stdescribe
quietly: local failures = `r(N_fail)'
stcox i.any`idg' 2.supu#cohort 2.ses#cohort 3.ses#cohort, strata(cohort), if any`idg'!=2
quietly: matrix m = r(table)
matrix list m
tempname hr1 ll1 ul1 hr2 ll2 ul2 N1 fail1 N2 fail2
scalar `hr1' = m[1,2]
scalar `ll1' = m[5,2]
scalar `ul1' = m[6,2]
scalar `N1' = e(N_sub)
scalar `fail1' = e(N_fail)
stcox i.any`idg' 2.supu#cohort 2.ses#cohort 3.ses#cohort, strata(cohort), if any`idg'!=1
quietly: matrix m = r(table)
matrix list m
scalar `hr2' = m[1,2]
scalar `ll2' = m[5,2]
scalar `ul2' = m[6,2]
scalar `N2' = e(N_sub)
scalar `fail2' = e(N_fail)

forvalues i =1/2 {
quietly: putexcel set "Pooled results.xlsx", sheet("FIGURE sensitivity dist") modify
quietly: putexcel K`irow'=(`N`i'), nformat(number)
quietly: putexcel L`irow'=(`fail`i'), nformat(number)
quietly: putexcel E`irow'=(`hr`i'), nformat(number_d2)
quietly: putexcel F`irow'=(`ll`i'), nformat(number_d2)
quietly: putexcel G`irow'=(`ul`i'), nformat(number_d2)
quietly: putexcel B`irow'=("Simultaneous infection diagnoses")
quietly: putexcel C`irow'=("pooled")
quietly: putexcel D`irow'=("10-year lag, No. of simultaneous infection diagnoses
= `i'")

tab any`idg', matcell(x), if _st==1 & inlist(any`idg',0,`i')
matrix list x
tab any`idg' ensidementia, matcell(y), if _d==1 & inlist(any`idg',0,`i')
matrix list y
quietly: putexcel set "Pooled results.xlsx", sheet("FIGURE sensitivity dist") modify
quietly: putexcel M`irow'=(x[2,1]), nformat(number)
quietly: putexcel N`irow'=(y[2,1]), nformat(number)

local ++irow
local ++irow
}

*P for trend
stcox any`idg' 2.supu#cohort 2.ses#cohort 3.ses#cohort, strata(cohort)
quietly: matrix n = r(table)
matrix list n

```

```

tempname p
scalar `p' = n[4,1]
quietly: putexcel set "Pooled results.xlsm", sheet("FIGURE sensitivity dist") modify
quietly: putexcel Q`prow'=(`p'), nformat(number)

local irow 24
restore
}

log close

*FIGURE sensitivity, CNS vs other infections
capture log close
log using "Sensitivity, CNS infection vs other infection.log", replace
local dg anycns noncns
local n_dg: word count `dg'
local dg_name `"'Any CNS infection vs not" "Any extra-CNS infection vs not"'

quietly: use "Inf_dem_lag.dta", clear
drop if ses==.

foreach idg of local dg {
    tab any`idg'
    replace any`idg' = . if any`idg'!=1 & anyanyinf==1
    tab any`idg'
    egen lag_entry_`idg' = rowmax(lag_entry_anyinf ensi`idg'pvm)
    gen ensi`idg'pvm_10y = ensi`idg'pvm + round(10*365.25)
    egen lag_entry_10y_`idg' = rowmax(lag_entry_10y_anyinf ensi`idg'pvm_10y)
}

quietly: local irow = 46
forvalues i=1/`n_dg' {
    preserve
    quietly: local idg : word `i' of `dg'
    quietly: local idg_name : word `i' of `dg_name'
    display ""
    display "`idg' followed by broad dementia, adjusted for sex and education and stratified by
cohort"

    display ""
    display "Pooled IPD-analysis, normal model and 10-year exclusion"
    display ""
    display "$S_TIME $S_DATE"
    display ""

    quietly: stset exitpvm, id(id) failure(ensidementia) origin(time syntpvm) enter(time
lag_entry_`idg') scale(365.25)
    quietly: keep id any`idg' supu cohort exitpvm ensidementia syntpvm entrypvm ensi`idg'pvm _st
_d _origin _t _t0 ses

    tab any`idg' if _st==1

    quietly: stdescribe
    quietly: local failures = `r(N_fail)'
    stcox any`idg' 2.supu#cohort 2.ses#cohort 3.ses#cohort, strata(cohort)
    quietly: matrix m = r(table)
    tempname hr ll ul
    scalar `hr' = m[1,1]
    scalar `ll' = m[5,1]
    scalar `ul' = m[6,1]

```

```

quietly: putexcel set "Pooled results.xlsm", sheet("FIGURE sensitivity dist") modify
      quietly: putexcel K`irow'=(`e(N_sub)'), nformat(number)
      quietly: putexcel L`irow'=(`e(N_fail)'), nformat(number)
      quietly: putexcel E`irow'=(`hr'), nformat(number_d2)
      quietly: putexcel F`irow'=(`ll'), nformat(number_d2)
      quietly: putexcel G`irow'=(`ul'), nformat(number_d2)
      quietly: putexcel B`irow'=("`idg'")
      quietly: putexcel C`irow'=("pooled")
      quietly: putexcel D`irow'=("`idg_name'")
tab any`idg', matcell(x), if _st==1
matrix list x
quietly: tab any`idg' ensidementia, matcell(y), if _d==1
matrix list y
quietly: putexcel set "Pooled results.xlsm", sheet("FIGURE sensitivity dist") modify
      quietly: putexcel M`irow'=(x[2,1]), nformat(number)
      quietly: putexcel N`irow'=(y[2,1]), nformat(number)

local ++irow
restore

*Dementia occurring from year 10 onwards
preserve
quietly: stset exitpvm, id(id) failure(ensidementia) origin(time syntpvm) enter(time
lag_entry_10y_`idg') scale(365.25)
quietly: stdescribe
quietly: local failures = `r(N_fail)'
stcox any`idg' 2.supu#cohort 2.ses#cohort 3.ses#cohort, strata(cohort)
quietly: matrix m = r(table)
scalar `hr' = m[1,1]
scalar `ll' = m[5,1]
scalar `ul' = m[6,1]
quietly: putexcel set "Pooled results.xlsm", sheet("FIGURE sensitivity dist") modify
      quietly: putexcel K`irow'=(`e(N_sub)'), nformat(number)
      quietly: putexcel L`irow'=(`e(N_fail)'), nformat(number)
      quietly: putexcel E`irow'=(`hr'), nformat(number_d2)
      quietly: putexcel F`irow'=(`ll'), nformat(number_d2)
      quietly: putexcel G`irow'=(`ul'), nformat(number_d2)
      quietly: putexcel B`irow'=("`idg'_10y_exclusion'")
      quietly: putexcel C`irow'=("pooled")
      quietly: putexcel D`irow'=("`Dementia occurring more than 10 years after the
hospitalisation'")

tab any`idg', matcell(x), if _st==1
matrix list x
quietly: tab any`idg' ensidementia, matcell(y), if _d==1
matrix list y
quietly: putexcel set "Pooled results.xlsm", sheet("FIGURE sensitivity dist") modify
      quietly: putexcel M`irow'=(x[2,1]), nformat(number)
      quietly: putexcel N`irow'=(y[2,1]), nformat(number)

local ++irow
local ++irow
restore
}

log close

*FIGURE sensitivity, infections predisposed towards entering the CNS vs other infections
capture log close
log using "Sensitivity, predisposed towards CNS vs others.log", replace
local dg anycnspreisp noncnspreisp

```

local n\_dg: word count `dg'

local dg\_name `"'Infection predisposed towards entering the CNS vs no infection" "Infection not predisposed towards entering the CNS vs no infection"'

quietly: use "Inf\_dem\_lag.dta", clear  
drop if ses==.

```
foreach idg of local dg {  
    tab any`idg'  
    replace any`idg' = . if any`idg'!=1 & anyanyinf==1  
    tab any`idg'  
    egen lag_entry_`idg' = rowmax(lag_entry_anyinf ensi`idg'pvm)  
    gen ensi`idg'pvm_10y = ensi`idg'pvm + round(10*365.25)  
    egen lag_entry_10y_`idg' = rowmax(lag_entry_10y_anyinf ensi`idg'pvm_10y)  
}
```

quietly: local irow = 76

```
forvalues i=1/'n_dg' {
```

```
    preserve
```

```
    quietly: local idg : word `i' of `dg'
```

```
    quietly: local idg_name : word `i' of `dg_name'
```

```
    display ""
```

```
    display "`idg' followed by broad dementia, adjusted for sex and education and stratified by
```

cohort"

```
    display ""
```

```
    display "Pooled IPD-analysis, normal model and 10-year exclusion"
```

```
    display ""
```

```
    display "$S_TIME $S_DATE"
```

```
    display ""
```

```
    quietly: stset exitpvm, id(id) failure(ensidementia) origin(time syntpvm) enter(time
```

lag\_entry\_`idg') scale(365.25)

```
    quietly: keep id any`idg' supu cohort exitpvm ensidementia syntpvm entrypvm ensi`idg'pvm _st
```

\_d \_origin \_t \_t0 ses

```
    tab any`idg' if _st==1
```

```
    quietly: stdescribe
```

```
    quietly: local failures = `r(N_fail)'
```

```
    stcox any`idg' 2.supu#cohort 2.ses#cohort 3.ses#cohort, strata(cohort)
```

```
    quietly: matrix m = r(table)
```

```
    tempname hr ll ul
```

```
    scalar `hr' = m[1,1]
```

```
    scalar `ll' = m[5,1]
```

```
    scalar `ul' = m[6,1]
```

```
    quietly: putexcel set "Pooled results.xlsm", sheet("FIGURE sensitivity dist") modify
```

```
        quietly: putexcel K`irow'=(`e(N_sub)'), nformat(number)
```

```
        quietly: putexcel L`irow'=(`e(N_fail)'), nformat(number)
```

```
        quietly: putexcel E`irow'=(`hr'), nformat(number_d2)
```

```
        quietly: putexcel F`irow'=(`ll'), nformat(number_d2)
```

```
        quietly: putexcel G`irow'=(`ul'), nformat(number_d2)
```

```
        quietly: putexcel B`irow'=("`idg'")
```

```
        quietly: putexcel C`irow'=("pooled")
```

```
        quietly: putexcel D`irow'=("`idg_name'")
```

```
    tab any`idg', matcell(x), if _st==1
```

```
    matrix list x
```

```
    quietly: tab any`idg' ensidementia, matcell(y), if _d==1
```

```
    matrix list y
```

```
    quietly: putexcel set "Pooled results.xlsm", sheet("FIGURE sensitivity dist") modify
```

```

quietly: putexcel M`irow'=(x[2,1]), nformat(number)
quietly: putexcel N`irow'=(y[2,1]), nformat(number)

local ++irow
restore

*Dementia occurring from year 10 onwards
preserve
quietly: stset exitpvm, id(id) failure(ensidementia) origin(time syntpvm) enter(time
lag_entry_10y_`idg') scale(365.25)
quietly: stdescribe
quietly: local failures = `r(N_fail)'
stcox any`idg' 2.supu#cohort 2.ses#cohort 3.ses#cohort, strata(cohort)
quietly: matrix m = r(table)
scalar `hr' = m[1,1]
scalar `ll' = m[5,1]
scalar `ul' = m[6,1]
quietly: putexcel set "Pooled results.xlsm", sheet("FIGURE sensitivity dist") modify
quietly: putexcel K`irow'=(`e(N_sub)'), nformat(number)
quietly: putexcel L`irow'=(`e(N_fail)'), nformat(number)
quietly: putexcel E`irow'=(`hr'), nformat(number_d2)
quietly: putexcel F`irow'=(`ll'), nformat(number_d2)
quietly: putexcel G`irow'=(`ul'), nformat(number_d2)
quietly: putexcel B`irow'=(" `idg'_10y_exclusion")
quietly: putexcel C`irow'=("pooled")
quietly: putexcel D`irow'=(" Dementia occurring more than 10 years after the
hospitalisation")

tab any`idg', matcell(x), if _st==1
matrix list x
quietly: tab any`idg' ensidementia, matcell(y), if _d==1
matrix list y
quietly: putexcel set "Pooled results.xlsm", sheet("FIGURE sensitivity dist") modify
quietly: putexcel M`irow'=(x[2,1]), nformat(number)
quietly: putexcel N`irow'=(y[2,1]), nformat(number)

local ++irow
local ++irow
restore
}

log close

```

#### \*TYPE OF HERPESVIRUS

```

capture log close
log using "FIGURE herpestype.log", replace
local dg hsv12 nonhsv mildherpes
local n_dg: word count `dg'
local dg_name ""Herpes simplex virus 1 and 2 infection" "Other herpesvirusinfection" "Mild herpesvirusinfection""
quietly: local irow = 7

```

```

quietly: use "Inf_dem_lag.dta", clear
merge 1:1 id using "herpeskoodit.dta"
drop _merge
drop if ses==.
tab anyhsv12
gen anynonhsv = 0
replace anynonhsv = 1 if anyherpes==1 & anyhsv12!=1

```

```

forvalues i=1/`n_dg' {

```



```

preserve
quietly: local idg : word `i' of `dg'
quietly: local idg_name : word `i' of `dg_name'
display ""
display "`idg' followed by broad dementia, adjusted for sex and education and stratified by
cohort"

display ""
display "Pooled IPD-analysis, normal model and 10-year exclusion"
display ""
display "$S_TIME $S_DATE"
display ""

capture drop ensi`idg'pvm
gen ensi`idg'pvm = ensiherpespvm if any`idg'==1

tab any`idg'
replace any`idg' = 0 if anyanyinf==0
replace any`idg' = . if any`idg'!=1 & anyanyinf==1
tab any`idg'
egen lag_entry_`idg' = rowmax(lag_entry_anyinf ensi`idg'pvm)
gen ensi`idg'pvm_10y = ensi`idg'pvm + round(10*365.25)
egen lag_entry_10y_`idg' = rowmax(lag_entry_10y_anyinf ensi`idg'pvm_10y)

quietly: stset exitpvm, id(id) failure(ensidementia) origin(time syntpvm) enter(time
lag_entry_`idg') scale(365.25)

quietly: keep id any`idg' supu cohort exitpvm ensidementia syntpvm entrypvm ensi`idg'pvm _st
_d _origin _t _t0 ses

tab any`idg' if _st==1

quietly: stdescribe
quietly: local failures = `r(N_fail)'
stcox any`idg' 2.supu#cohort 2.ses#cohort 3.ses#cohort, strata(cohort)
quietly: matrix m = r(table)
tempname hr ll ul
scalar `hr' = m[1,1]
scalar `ll' = m[5,1]
scalar `ul' = m[6,1]
quietly: putexcel set "Pooled results.xlsx", sheet("FIGURE herpes sensitivity") modify
quietly: putexcel K`irow'=(`e(N_sub)'), nformat(number)
quietly: putexcel L`irow'=(`e(N_fail)'), nformat(number)
quietly: putexcel E`irow'=(`hr'), nformat(number_d2)
quietly: putexcel F`irow'=(`ll'), nformat(number_d2)
quietly: putexcel G`irow'=(`ul'), nformat(number_d2)
quietly: putexcel B`irow'=("`idg'")
quietly: putexcel C`irow'=("pooled")
quietly: putexcel D`irow'=("`idg_name'")
tab any`idg', matcell(x), if _st==1
matrix list x
quietly: tab any`idg' ensidementia, matcell(y), if _d==1
matrix list y
quietly: putexcel set "Pooled results.xlsx", sheet("FIGURE herpes sensitivity") modify
quietly: putexcel M`irow'=(x[2,1]), nformat(number)
quietly: putexcel N`irow'=(y[2,1]), nformat(number)

local ++irow

restore
}

```

log close

\*MOST COMMON GRAM-POSITIVE INFECTIONS

capture log close

log using "FIGURE gramplus.log", replace

local dg streptoc cdiffic othergramplus

local n\_dg: word count `dg'

local dg\_name `"'Streptococcal infection" "Enterocolitis due to Clostridium difficile" "Other Gram-positive infection"'"

quietly: local irow = 7

quietly: use "Inf\_dem\_lag.dta", clear  
merge 1:1 id using "grampluskoodit.dta"  
drop \_merge  
drop if ses==.

forvalues i=1/'n\_dg' {

preserve

quietly: local idg : word `i' of `dg'

quietly: local idg\_name : word `i' of `dg\_name'

display ""

display ""`idg' followed by broad dementia, adjusted for sex and education and stratified by

cohort"

display ""

display "Pooled IPD-analysis, normal model and 10-year exclusion"

display ""

display "\$S\_TIME \$S\_DATE"

display ""

recode any `idg' 0=.

recode any `idg' . = 0 if anyanyinf==0

gen ensi`idg'pvm = ensigrampluspvm if any `idg'==1

egen lag\_entry\_`idg' = rowmax(lag\_entry\_`anyinf' ensi`idg'pvm)

quietly: stset exitpvm, id(id) failure(ensidementia) origin(time syntpvm) enter(time

lag\_entry\_`idg') scale(365.25)

quietly: keep id any `idg' supu cohort exitpvm ensidementia syntpvm entrypvm ensi`idg'pvm \_st

\_d \_origin \_t \_t0 ses

tab any `idg' if \_st==1

quietly: stdescribe

quietly: local failures = `r(N\_fail)'

stcox any `idg' 2.supu#cohort 2.ses#cohort 3.ses#cohort, strata(cohort)

quietly: matrix m = r(table)

tempname hr ll ul

scalar `hr' = m[1,1]

scalar `ll' = m[5,1]

scalar `ul' = m[6,1]

quietly: putexcel set "Pooled results.xlsm", sheet("FIGURE gramplus") modify

quietly: putexcel K`irow'=(`e(N\_sub)'), nformat(number)

quietly: putexcel L`irow'=(`e(N\_fail)'), nformat(number)

quietly: putexcel E`irow'=(`hr'), nformat(number\_d2)

quietly: putexcel F`irow'=(`ll'), nformat(number\_d2)

quietly: putexcel G`irow'=(`ul'), nformat(number\_d2)

quietly: putexcel B`irow'=("`idg'")

quietly: putexcel C`irow'=("pooled")

quietly: putexcel D`irow'=("`idg\_name'")

```

tab any`idg', matcell(x), if _st==1
matrix list x
quietly: tab any`idg' ensidementia, matcell(y), if _d==1
matrix list y
quietly: putexcel set "Pooled results.xlsx", sheet("FIGURE gramplus") modify
               quietly: putexcel M`irow'=(x[2,1]), nformat(number)
               quietly: putexcel N`irow'=(y[2,1]), nformat(number)

local ++irow

restore
}

```

log close

#### \*MOST COMMON GRAM-NEGATIVE INFECTIONS

```

capture log close
log using "FIGURE gramminus.log", replace
local dg salmonella lyme othergramminus
local n_dg: word count `dg'
local dg_name ""Salmonella infection" "Lyme disease" "Other Gram-negative infection""
quietly: local irow = 7

```

```

quietly: use "Inf_dem_lag.dta", clear
merge 1:1 id using "gramminus_koodit.dta"
tab anygramminus
tab anysalmonella
tab anylyme
tab anyothergramminus
tab anyothergramminussepsis
replace anyothergramminus = 1 if anyothergramminussepsis==1
tab anyothergramminus
drop _merge
drop if ses==.

```

```

forvalues i=1/'n_dg' {
  preserve
  quietly: local idg : word `i' of `dg'
  quietly: local idg_name : word `i' of `dg_name'
  display ""
  display ""`idg' followed by broad dementia, adjusted for sex and education and stratified by
  cohort"

  display ""
  display "Pooled IPD-analysis, normal model and 10-year exclusion"
  display ""
  display "$S_TIME $S_DATE"
  display ""

  recode any`idg' 0=.
  recode any`idg' . = 0 if anyanyinf==0
  gen ensi`idg'pvm = ensigramminuspvm if any`idg'==1
  egen lag_entry_`idg' = rowmax(lag_entry_`anyinf' ensi`idg'pvm)

  quietly: stset exitpvm, id(id) failure(ensidementia) origin(time syntpvm) enter(time
lag_entry_`idg') scale(365.25)
  quietly: keep id any`idg' supu cohort exitpvm ensidementia syntpvm entrypvm ensi`idg'pvm _st
_d _origin _t _t0 ses
  tab any`idg' if _st==1

```

```

quietly: stdescribe
quietly: local failures = `r(N_fail)'
stcox any`idg' 2.supu#cohort 2.ses#cohort 3.ses#cohort, strata(cohort)
quietly: matrix m = r(table)
tempname hr ll ul
scalar `hr' = m[1,1]
scalar `ll' = m[5,1]
scalar `ul' = m[6,1]
quietly: putexcel set "Pooled results.xlsx", sheet("FIGURE gramminus") modify
quietly: putexcel K`irow'=(`e(N_sub)'), nformat(number)
quietly: putexcel L`irow'=(`e(N_fail)'), nformat(number)
quietly: putexcel E`irow'=(`hr'), nformat(number_d2)
quietly: putexcel F`irow'=(`ll'), nformat(number_d2)
quietly: putexcel G`irow'=(`ul'), nformat(number_d2)
quietly: putexcel B`irow'=("`idg'")
quietly: putexcel C`irow'=("pooled")
quietly: putexcel D`irow'=("`idg_name'")
tab any`idg', matcell(x), if _st==1
matrix list x
quietly: tab any`idg' ensidementia, matcell(y), if _d==1
matrix list y
quietly: putexcel set "Pooled results.xlsx", sheet("FIGURE gramminus") modify
quietly: putexcel M`irow'=(x[2,1]), nformat(number)
quietly: putexcel N`irow'=(y[2,1]), nformat(number)

local ++irow

restore
}

```

log close

\*\*\* FINE AND GRAY MODEL \*\*\*

```

capture log close
log using "FIGURE fine gray.log", replace
local dg anyinf bactinf viralinf
local n_dg: word count `dg'
local dg_name ""Any infectious disease" "Any bacterial infection" "Any viral infection""
quietly: local irow = 7

```

```

quietly: use "Inf_dem_lag.dta", clear
drop if ses==.

```

```

stset exitpvm, id(id) failure(ensidementia) origin(time syntpvm) enter(time lag_entry_anyinf)
scale(365.25)

```

```

tab ensidementia
*Coding of detailedfail: 1 early-onset dementia, 2 late-onset dementia, 3 death
gen byte detailedfail = 1 if _d==1 & _t<65
replace detailedfail = 2 if _d==1 & _t>=65
replace detailedfail = 3 if failure==2
tab ensidementia
tab failure
tab detailedfail

```

```

forvalues i=1/`n_dg' {

```

```

quietly: local idg : word `i' of `dg'
quietly: local idg_name : word `i' of `dg_name'
display ""
display "`idg' followed by broad dementia, adjusted for sex and education and stratified by
cohort"

display ""
display "Pooled IPD-analysis, normal model and 10-year exclusion"
display ""
display "$S_TIME $S_DATE"
display ""

forvalues j=1/3 {
preserve
if `j'==1 | `j'== 2 {
scale(365.25)
stset exitpvm, id(id) failure(ensidementia) origin(time syntpvm) enter(time lag_entry_`idg')
}
else if `j'== 3 {
scale(365.25)
stset exitpvm, id(id) failure(detailedfail==2) origin(time syntpvm) enter(time lag_entry_`idg')
}

quietly: keep id any`idg' supu cohort exitpvm ensidementia syntpvm entrypvm ensi`idg'pvm _st
_d _origin _t _t0 ses detailedfail lag_entry_`idg'
tab any`idg' if _st==1

quietly: stdescribe
quietly: local failures = `r(N_fail)'

if `j'==1 {
stcox any`idg' 2.supu#cohort 2.ses#cohort 3.ses#cohort, strata(cohort)
}
else if `j'== 2 {
stcrreg any`idg' 2.supu#cohort 2.ses#cohort 3.ses#cohort i.cohort, cl(cohort)
}
else if `j'== 3 {
stcrreg any`idg' 2.supu#cohort 2.ses#cohort 3.ses#cohort i.cohort, cl(cohort)
}

quietly: matrix m = r(table)
tempname hr ll ul
scalar `hr' = m[1,1]
scalar `ll' = m[5,1]
scalar `ul' = m[6,1]
quietly: putexcel set "Pooled results.xlsx", sheet("FIGURE fine gray (appendix)") modify
quietly: putexcel K`irow'=(`e(N_sub)'), nformat(number)
quietly: putexcel L`irow'=(`e(N_fail)'), nformat(number)
quietly: putexcel E`irow'=(`hr'), nformat(number_d2)
quietly: putexcel F`irow'=(`ll'), nformat(number_d2)
quietly: putexcel G`irow'=(`ul'), nformat(number_d2)
quietly: putexcel B`irow'=("`idg'")
quietly: putexcel C`irow'=("pooled")
if `j'==1 {
quietly: putexcel D`irow'=("`idg_name', Cox model")
}
else if `j'== 2 {

```

```

death")
quietly: putexcel D`irow'=("`idg_name', Fine & Gray model, competing outcome
)
else if `j'== 3 {
death + early-onset dementia")
quietly: putexcel D`irow'=("`idg_name', Fine & Gray model, competing outcome
)
tab any`idg', matcell(x), if _st==1
matrix list x
quietly: tab any`idg' _d, matcell(y), if _d==1
matrix list y
quietly: putexcel set "Pooled results.xlsx", sheet("FIGURE fine gray (appendix)") modify
quietly: putexcel M`irow'=(x[2,1]), nformat(number)
quietly: putexcel N`irow'=(y[2,1]), nformat(number)

local ++irow
restore
}
local ++irow
}

log close

```

\*\*\* TIME INTERACTION \*\*\*

capture log close

log using "Time interaction.log", replace

```

quietly: use "Inf_dem_lag.dta", clear
drop if ses==.

```

local dg anyinf bactinf viralinf

local n\_dg: word count `dg'

local dg\_name `"'Any infectious disease" "Bacterial infection" "Viral infection"'"

quietly: local irow = 7

```

forvalues i=1/`n_dg' {

```

```

preserve

```

```

quietly: local idg : word `i' of `dg'

```

```

quietly: local idg_name : word `i' of `dg_name'

```

```

display ""

```

```

display "`idg' followed by broad dementia, adjusted for sex and education and stratified by

```

cohort"

```

display ""

```

```

display "Pooled IPD-analysis, normal model and 10-year exclusion"

```

```

display ""

```

```

display "$S_TIME $S_DATE"

```

```

display ""

```

```

quietly: keep id any`idg' supu cohort exitpvm ensidemementia syntpvm entrypvm ensi`idg'pvm ses

```

lag\_entry\_`idg'

```

stset exitpvm, id(id) failure(ensidemementia) origin(time lag_entry_`idg') scale(365.25)

```

```

gen age`idg' = (lag_entry_`idg'-syntpvm)/365.25

```

```

gen age`idg'2 = age`idg'^2

```

```

tab any`idg' if _st==1

```

```

quietly: stdescribe

```

```

quietly: local failures = `r(N_fail)'

```

```

strata(cohort)          stcox any`idg' 2.supu#cohort 2.ses#cohort 3.ses#cohort c.age`idg'#cohort c.age`idg'2#cohort,
                        matrix m = r(table)
                        matrix list m
strata(cohort) tvc(any`idg') texp(ln(_t))
                        stcox any`idg' 2.supu#cohort 2.ses#cohort 3.ses#cohort c.age`idg'#cohort c.age`idg'2#cohort,
                        matrix m2 = r(table)
                        matrix list m2
                        restore
                        }
log close

version 16

                        use "Inf_dem_lag.dta", replace

*** eTABLE 4 ****
*(was previously TABLE 2) *

capture log close
log using "TABLE2.log", replace

use "Inf_dem_lag.dta", clear
quietly: drop if ses==.
quietly: gen hypertensio_combpvm = hypert_combpvm
merge 1:1 id using "Parkinson.dta"
keep if _merge==3
drop _merge

local dg anyinf
local eks ""no one" "hypertensio" "diabetes" "ihd" "cereb" "parkinson"
local n_dg: word count `dg'
local n_eks: word count `eks'
local dg_name ""Any infectious disease vs no infection""
local eks_name ""no one" "hypertension" "diabetes" "ischaemic heart disease" "cerebrovascular disease" "Parkinson's disease""
quietly: local irow = 8
                        forvalues i=1/'n_dg' {
                        forvalues j=1/'n_eks' {
                                preserve
                                quietly: local idg : word `i' of `dg'
                                quietly: local idg_name : word `i' of `dg_name'
                                quietly: local ieks : word `j' of `eks'
                                quietly: local ieks_name : word `j' of `eks_name'
                                display ""
                                display ""`idg' followed by broad dementia, adjusted for sex and education and stratified by
cohort"
                                display ""
                                display "Pooled IPD-analysis, normal model"
                                display ""
                                display "$S_TIME $S_DATE"
                                display ""

                                if inlist("`ieks'", "hypertensio", "diabetes", "ihd", "cereb", "parkinson") {
                                        drop if `ieks'_combpvm <= lag_entry_anyinf
                                }

```

```

scale(365.25)          stset exitpvm, id(id) failure(ensidementia) origin(time syntpvm) enter(time lag_entry_anyinf)

keep if _st==1

if "`ieks'"=="hypertensio" & "`idg'"=="anyinf" {
    local irow = 25
}

quietly: capture keep id any`idg' supu cohort exitpvm ensidementia syntpvm entrypvm
ensi`idg'pvm _st _d _origin _t _t0 ses `ieks'_comb
tab any`idg'

quietly: stdescribe
quietly: local failures = `r(N_fail)'
stcox any`idg' 2.supu#cohort 2.ses#cohort 3.ses#cohort, strata(cohort)
quietly: matrix m = r(table)
tempname hr ll ul
scalar `hr' = m[1,1]
scalar `ll' = m[5,1]
scalar `ul' = m[6,1]
quietly: putexcel set "Pooled results.xlsm", sheet("TABLE2") modify
    quietly: putexcel K`irow'=(`e(N_sub)'), nformat(number)
    quietly: putexcel L`irow'=(`e(N_fail)'), nformat(number)
    quietly: putexcel E`irow'=(`hr'), nformat(number_d2)
    quietly: putexcel F`irow'=(`ll'), nformat(number_d2)
    quietly: putexcel G`irow'=(`ul'), nformat(number_d2)
    quietly: putexcel B`irow'=("`idg'")
    quietly: putexcel C`irow'=("pooled")
    quietly: putexcel D`irow'=("Those with `ieks_name' excluded")
tab any`idg', matcell(x), if _st==1
matrix list x
quietly: tab any`idg' _d, matcell(y), if _d==1
matrix list y
quietly: putexcel set "Pooled results.xlsm", sheet("TABLE2") modify
    quietly: putexcel M`irow'=(x[2,1]), nformat(number)
    quietly: putexcel N`irow'=(y[2,1]), nformat(number)

local ++irow
restore
}
}

```

\*Early- vs late-onset dementia (Gram-negative)

```

use "Inf_dem_lag.dta", clear
drop if ses==.

quietly: stset exitpvm, id(id) failure(ensidementia) origin(time syntpvm) enter(time
lag_entry_anyinf) scale(365.25)

keep if _st==1
local idg anyinf
quietly: capture keep id any`idg' supu cohort exitpvm ensidementia syntpvm entrypvm
ensi`idg'pvm _st _d _origin _t _t0 ses
tab any`idg'

stsplint age65, at(64.999)
recode age65 64.999=1

preserve
keep if age65==0

```



```

local irow 12
quietly: stdescribe
quietly: local failures = `r(N_fail)'
stcox any`idg' 2.supu#cohort 2.ses#cohort 3.ses#cohort, strata(cohort)
quietly: matrix m = r(table)
tempname hr ll ul
scalar `hr' = m[1,1]
scalar `ll' = m[5,1]
scalar `ul' = m[6,1]
quietly: putexcel set "Pooled results.xlsx", sheet("TABLE2") modify
    quietly: putexcel K`irow'=(`e(N_sub)'), nformat(number)
    quietly: putexcel L`irow'=(`e(N_fail)'), nformat(number)
    quietly: putexcel E`irow'=(`hr'), nformat(number_d2)
    quietly: putexcel F`irow'=(`ll'), nformat(number_d2)
    quietly: putexcel G`irow'=(`ul'), nformat(number_d2)
    quietly: putexcel B`irow'=("`idg'")
    quietly: putexcel C`irow'=("pooled")
    quietly: putexcel D`irow'=("Early-onset dementia (onset before age 65)")
tab any`idg', matcell(x), if _st==1
matrix list x
quietly: tab any`idg' ensidementia, matcell(y), if _d==1
matrix list y
quietly: putexcel set "Pooled results.xlsx", sheet("TABLE2") modify
    quietly: putexcel M`irow'=(x[2,1]), nformat(number)
    quietly: putexcel N`irow'=(y[2,1]), nformat(number)
restore

preserve
keep if age65==1
local irow 13
quietly: stdescribe
quietly: local failures = `r(N_fail)'
stcox any`idg' 2.supu#cohort 2.ses#cohort 3.ses#cohort, strata(cohort)
quietly: matrix m = r(table)
tempname hr ll ul
scalar `hr' = m[1,1]
scalar `ll' = m[5,1]
scalar `ul' = m[6,1]
quietly: putexcel set "Pooled results.xlsx", sheet("TABLE2") modify
    quietly: putexcel K`irow'=(`e(N_sub)'), nformat(number)
    quietly: putexcel L`irow'=(`e(N_fail)'), nformat(number)
    quietly: putexcel E`irow'=(`hr'), nformat(number_d2)
    quietly: putexcel F`irow'=(`ll'), nformat(number_d2)
    quietly: putexcel G`irow'=(`ul'), nformat(number_d2)
    quietly: putexcel B`irow'=("`idg'")
    quietly: putexcel C`irow'=("pooled")
    quietly: putexcel D`irow'=("Late-onset dementia (onset at or after age 65)")
tab any`idg', matcell(x), if _st==1
matrix list x
quietly: tab any`idg' ensidementia, matcell(y), if _d==1
matrix list y
quietly: putexcel set "Pooled results.xlsx", sheet("TABLE2") modify
    quietly: putexcel M`irow'=(x[2,1]), nformat(number)
    quietly: putexcel N`irow'=(y[2,1]), nformat(number)
restore

```

\*Type of dementia

```

                use "Inf_dem_lag.dta", clear
tab dementiatyyppi_laaja anyanyinf if ensidementia==1, col chi
    local irow 15
    local j 1
    foreach type in AD FTD PD VD other unspecified {
        preserve
        encode dementiatyyppi_laaja, gen(dementiatyyppi_laaja_nro)

        display ""
        display "`type'"
        display ""
        local idg gramminus
        drop if ses==.

                stset exitpvm, id(id) failure(dementiatyyppi_laaja_nro==`j') origin(time syntpvm) enter(time
lag_entry_anyinf) scale(365.25)
                keep if _st==1

                local idg anyinf
                quietly: capture keep id any`idg' supu cohort exitpvm ensidementia syntpvm entrypvm
                ensi`idg'pvm _st _d _origin _t _t0 ses
                tab any`idg'

                quietly: stdescribe
                quietly: local failures = `r(N_fail)'
                stcox any`idg' 2.supu#cohort 2.ses#cohort 3.ses#cohort, strata(cohort)
                quietly: matrix m = r(table)
                tempname hr ll ul
                scalar `hr' = m[1,1]
                scalar `ll' = m[5,1]
                scalar `ul' = m[6,1]
                quietly: putexcel set "Pooled results.xlsm", sheet("TABLE2") modify
                    quietly: putexcel K`irow'=(`e(N_sub)'), nformat(number)
                    quietly: putexcel L`irow'=(`e(N_fail)'), nformat(number)
                    quietly: putexcel E`irow'=(`hr'), nformat(number_d2)
                    quietly: putexcel F`irow'=(`ll'), nformat(number_d2)
                    quietly: putexcel G`irow'=(`ul'), nformat(number_d2)
                    quietly: putexcel B`irow'=("`idg'")
                    quietly: putexcel C`irow'=("pooled")
                    quietly: putexcel D`irow'=("`type'")
                tab any`idg', matcell(x), if _st==1
                matrix list x
                quietly: tab any`idg' _d, matcell(y), if _d==1
                matrix list y
                quietly: putexcel set "Pooled results.xlsm", sheet("TABLE2") modify
                    quietly: putexcel M`irow'=(x[2,1]), nformat(number)
                    quietly: putexcel N`irow'=(y[2,1]), nformat(number)

                local ++irow
                local ++j
                restore
            }

```

#### \*Adjustments

```

local dg anyinf
local eks alcocl tupakka
local n_dg: word count `dg'
local n_eks: word count `eks'

```

```

local dg_name `"'Any infectious disease'"`
local eks_name `"'heavy drinking" "smoking'"`
quietly: local irow = 31
      forvalues i=1/'n_dg' {
      forvalues j=1/'n_eks' {
          quietly: local idg : word `i' of `dg'
          quietly: local idg_name : word `i' of `dg_name'
          quietly: local ieks : word `j' of `eks'
          quietly: local ieks_name : word `j' of `eks_name'
          display ""
          display ""`idg' followed by broad dementia, adjusted for sex and education and `eks_name' and
stratified by cohort"
          display ""
          display "Pooled IPD-analysis, normal model"
          display ""
          display "$S_TIME $S_DATE"
          display ""

          use "Inf_dem_lag.dta", clear
          drop if ses==.

          if "`iek'"=="alcocl" {
              replace lag_entry_anyinf = alkopvm if cohort==1 & alkopvm>=lag_entry_anyinf // 1 = FPS, in
FPS, the questionnaire data was sometimes collected only after study entry. To avoid immortal time bias, the follow up is started
only after the date of the questionnaire in the analyses using information from that questionnaire.
              tab `iek'
              drop if `iek' ==.
          }
          if "`iek'"=="tupakka" {
              replace lag_entry_anyinf = tupakkapvm if cohort==1 & tupakkapvm>=lag_entry_anyinf // 1 =
FPS, in FPS, the questionnaire data was sometimes collected only after study entry. To avoid immortal time bias, the follow up is
started only after the date of the questionnaire in the analyses using information from that questionnaire.
              tab `iek'
              drop if `iek' ==.
          }

          quietly: stset exitpvm, id(id) failure(ensidementia) origin(time syntpvm) enter(time
lag_entry_anyinf) scale(365.25)
          keep if _st==1
          quietly: capture keep id any`idg' supu cohort exitpvm ensidementia syntpvm lag_entry_anyinf
ensid`idg'pvm _st_d_origin_t_t0 ses `iek'_comb
          tab any`idg'

          *Those with data on the covariate available but without adjustment
          quietly: stdescribe
          quietly: local failures = `r(N_fail)'
          stcox any`idg' 2.supu#cohort 2.ses#cohort 3.ses#cohort, strata(cohort)
          quietly: matrix m = r(table)
          tempname hr ll ul
          scalar `hr' = m[1,1]
          scalar `ll' = m[5,1]
          scalar `ul' = m[6,1]
          quietly: putexcel set "Pooled results.xlsm", sheet("TABLE2") modify
              quietly: putexcel K`irow'=(`e(N_sub)'), nformat(number)
              quietly: putexcel L`irow'=(`e(N_fail)'), nformat(number)
              quietly: putexcel E`irow'=(`hr'), nformat(number_d2)
              quietly: putexcel F`irow'=(`ll'), nformat(number_d2)
              quietly: putexcel G`irow'=(`ul'), nformat(number_d2)

```

```

        quietly: putexcel B`irow'=("`idg'")
        quietly: putexcel C`irow'=("pooled")
        quietly: putexcel D`irow'=("Data available for `ieks_name'")
tab any`idg', matcell(x), if _st==1
matrix list x
quietly: tab any`idg' ensidementia, matcell(y), if _d==1
matrix list y
quietly: putexcel set "Pooled results.xlsx", sheet("TABLE2") modify
        quietly: putexcel M`irow'=(x[2,1]), nformat(number)
        quietly: putexcel N`irow'=(y[2,1]), nformat(number)
local ++irow

*Those with data on the covariate available and adjusted
quietly: stdescribe
quietly: local failures = `r(N_fail)'
if "`ieks'" == "alcocl" {
stcox any`idg' 2.supu#cohort 2.ses#cohort 3.ses#cohort 1.`ieks'#cohort 2.`ieks'#cohort
3.`ieks'#cohort, strata(cohort)
}
else if "`ieks'" == "tupakka" {
stcox any`idg' 2.supu#cohort 2.ses#cohort 3.ses#cohort 2.`ieks'#cohort 3.`ieks'#cohort,
strata(cohort)
}
else if "`ieks'" == "bmi_who" {
stcox any`idg' 2.supu#cohort 2.ses#cohort 3.ses#cohort 25.`ieks'#cohort 30.`ieks'#cohort,
strata(cohort)
}
else if "`ieks'" == "bmi" {
stcox any`idg' 2.supu#cohort 2.ses#cohort 3.ses#cohort c.`ieks'#cohort c.`ieks'2#cohort,
strata(cohort)
}
quietly: matrix m = r(table)
tempname hr ll ul
scalar `hr' = m[1,1]
scalar `ll' = m[5,1]
scalar `ul' = m[6,1]
quietly: putexcel set "Pooled results.xlsx", sheet("TABLE2") modify
        quietly: putexcel K`irow'=(`e(N_sub)'), nformat(number)
        quietly: putexcel L`irow'=(`e(N_fail)'), nformat(number)
        quietly: putexcel E`irow'=(`hr'), nformat(number_d2)
        quietly: putexcel F`irow'=(`ll'), nformat(number_d2)
        quietly: putexcel G`irow'=(`ul'), nformat(number_d2)
        quietly: putexcel B`irow'=("`idg'")
        quietly: putexcel C`irow'=("pooled")
        quietly: putexcel D`irow'=("Additionally adjusted for `ieks_name'")
tab any`idg', matcell(x), if _st==1
matrix list x
quietly: tab any`idg' ensidementia, matcell(y), if _d==1
matrix list y
quietly: putexcel set "Pooled results.xlsx", sheet("TABLE2") modify
        quietly: putexcel M`irow'=(x[2,1]), nformat(number)
        quietly: putexcel N`irow'=(y[2,1]), nformat(number)

local ++irow
local ++irow
}
quietly: local irow = 59
}

```

\*Potential period effect

```
local dg anyinf
local n_dg: word count `dg'
local dg_name `"'Any infectious disease'"
local irow 37
    forvalues i=1/'n_dg' {
        quietly: local idg : word `i' of `dg'
        quietly: local idg_name : word `i' of `dg_name'
        display ""
        display "`idg' followed by broad dementia, adjusted for sex and education and stratified by
cohort"

        display ""
        display "Pooled IPD-analysis, potential period effect"
        display ""
        display "$S_TIME $S_DATE"
        display ""

        use "Inf_dem_lag.dta", clear
        drop if ses==.

        quietly: stset exitpvm, id(id) failure(failure ==1) origin(time syntpvm) enter(time
lag_entry_anyinf) scale(365.25)
        keep if _st==1
        quietly: keep id any`idg' supu cohort exitpvm ensidementia failure syntpvm entrypvm
ensi`idg'pvm _st _d _origin _t _t0 ses syntvuosi
        tab any`idg'

        quietly: stdescribe
        quietly: local failures = `r(N_fail)'
        stcox any`idg' 2.supu#cohort 2.ses#cohort 3.ses#cohort c.syntvuosi#cohort, strata(cohort)

        quietly: matrix m = r(table)
        tempname hr ll ul
        scalar `hr' = m[1,1]
        scalar `ll' = m[5,1]
        scalar `ul' = m[6,1]
        quietly: putexcel set "Pooled results.xlsm", sheet("TABLE2") modify
            quietly: putexcel K`irow'=(`e(N_sub)'), nformat(number)
            quietly: putexcel L`irow'=(`e(N_fail)'), nformat(number)
            quietly: putexcel E`irow'=(`hr'), nformat(number_d2)
            quietly: putexcel F`irow'=(`ll'), nformat(number_d2)
            quietly: putexcel G`irow'=(`ul'), nformat(number_d2)
            quietly: putexcel B`irow'=("`idg'")
            quietly: putexcel C`irow'=("pooled")
            quietly: putexcel D`irow'=("Adjusted for period effect")
        tab any`idg', matcell(x), if _st==1
        matrix list x
        quietly: tab any`idg' ensidementia, matcell(y), if _d==1
        matrix list y
        quietly: putexcel set "Pooled results.xlsm", sheet("TABLE2") modify
            quietly: putexcel M`irow'=(x[2,1]), nformat(number)
            quietly: putexcel N`irow'=(y[2,1]), nformat(number)

        local irow 65
    }
}
```

\*\*\*\*\* TEST FOR DIFFERENCE BETWEEN INFECTIONS \*\*\*\*\*

\*Test for difference.

capture log close

log using "Test for difference v7.log", replace

```
use "Inf_dem_lag.dta", replace
```

```
drop if ses==.
```

```
*Intra vs extracellular
```

```
egen ensiintranotextracpvm = rowmin(ensiiintracpvm ensiextracpvm)
```

```
replace ensiintranotextracpvm = . if ensiiintracpvm==ensiextracpvm
```

```
gen byte anyintranotextrac = 1 if ensiiintracpvm==ensiintranotextracpvm & ensiintranotextracpvm!=.
```

```
replace anyintranotextrac = 0 if ensiextracpvm==ensiintranotextracpvm & ensiintranotextracpvm!=. &
```

```
anyintranotextrac!=1
```

```
sum ensiintranotextracpvm
```

```
tab anyintranotextrac
```

```
tab anyintrac
```

```
tab anyextrac
```

```
*Gram+ vs gram-
```

```
egen ensigramplusnotminuspvm = rowmin(ensigrampluspvm ensigramminuspvm)
```

```
replace ensigramplusnotminuspvm = . if ensigrampluspvm==ensigramminuspvm
```

```
gen byte anygramplusnotminus = 1 if ensigrampluspvm==ensigramplusnotminuspvm &
```

```
ensigramplusnotminuspvm!=.
```

```
replace anygramplusnotminus = 0 if ensigramminuspvm==ensigramplusnotminuspvm &
```

```
ensigramplusnotminuspvm!=. & anygramplusnotminus!=1
```

```
sum ensigramplusnotminuspvm
```

```
tab anygramplusnotminus
```

```
tab anygramplus
```

```
tab anygramminus
```

```
*Bacterial infection with sepsis vs without sepsis
```

```
gen byte anybactsepsisnotsepsis = 1 if ensibactsepsispvm==ensibactinfpvm & anybactsepsis==1
```

```
replace anybactsepsisnotsepsis = 0 if ensibact_nonsepsispvm==ensibactinfpvm & anybactsepsisnotsepsis!=1 &
```

```
anybact_nonsepsis==1
```

```
gen ensibactsepsisnotsepsispvm = ensibactinfpvm
```

```
sum ensibactsepsisnotsepsispvm
```

```
tab anybactsepsisnotsepsis
```

```
tab anybact_nonsepsis
```

```
tab anybactsepsis
```

```
*CNS infection vs non cns infection
```

```
gen byte anycnsnotcns = 1 if ensianycnspvm==ensianyinfpvm & anyanycns==1
```

```
replace anycnsnotcns = 0 if ensinoncnspvm==ensianyinfpvm & anycnsnotcns!=1 & anynoncns==1
```

```
gen ensicnsnotcnspvm = ensianyinfpvm
```

```
sum ensicnsnotcnspvm
```

```
tab anycnsnotcns
```

```
tab anyanycns
```

```
tab anynoncns
```

```
*CNS predisposed vs non cns predisposed
```

```
gen byte anycnspredisnotpredisp = 1 if ensiancnspredisppvm==ensianyinfpvm & anyanycnspredis==1
```

```
replace anycnspredisnotpredisp = 0 if ensinoncnspredisppvm==ensianyinfpvm & anycnspredisnotpredisp!=1
```

```
& anynoncnspredis==1
```

```
gen ensicnspredisnotpredispvm = ensianyinfpvm
```

```
sum ensicnspredisnotpredisppvm
tab anycnspredisnotpredisp
tab anyanycnspredisp
tab anynoncnspredisp
```

\*Acute vs chronic

```
gen byte anyacutenotchronic = 0 if ensianyperspvm==ensianyinfpvm & anyanypers==1
replace anyacutenotchronic = 1 if ensinonperspvm==ensianyinfpvm & anyacutenotchronic!=1 & anynonpers==1
gen ensiacutenotchronicpvm = ensianyinfpvm
sum ensiacutenotchronicpvm
tab anyacutenotchronic
tab anyanypers
tab anynonpers
```

\*Herpesvirus vs persistent viral infection

```
egen ensiherpesnotpersviralpvm = rowmin(ensiherpespvm ensipersviralpvm)
gen byte anyherpesnotpersviral = 1 if ensiherpespvm==ensiherpesnotpersviralpvm & anyherpes==1
replace anyherpesnotpersviral = 0 if ensipersviralpvm==ensiherpesnotpersviralpvm & anyherpesnotpersviral!=1
& anypersviral==1
sum ensiherpesnotpersviralpvm
tab anyherpesnotpersviral
tab anyherpes
tab anypersviral
```

\*Herpesvirus vs acute viral infection

```
egen ensiherpesnotacuteviralpvm = rowmin(ensiherpespvm ensiacuteviralpvm)
gen byte anyherpesnotacuteviral = 1 if ensiherpespvm==ensiherpesnotacuteviralpvm & anyherpes==1
replace anyherpesnotacuteviral = 0 if ensiacuteviralpvm==ensiherpesnotacuteviralpvm &
anyherpesnotacuteviral!=1 & anyacuteviral==1
sum ensiherpesnotacuteviralpvm
tab anyherpesnotacuteviral
tab anyherpes
tab anyacuteviral
```

\*Non herpes persistent vs acute viral infection

```
egen ensipersnotacuteviralpvm = rowmin(ensipersviralpvm ensiacuteviralpvm)
gen byte anypersnotacuteviral = 1 if ensipersviralpvm==ensipersnotacuteviralpvm & anypersviral==1
replace anypersnotacuteviral = 0 if ensiacuteviralpvm==ensipersnotacuteviralpvm & anypersnotacuteviral!=1 &
anyacuteviral==1
sum ensipersnotacuteviralpvm
tab anypersnotacuteviral
tab anypersviral
tab anyacuteviral
```

\*Bacteria vs viruses

```
egen ensibactnotviralpvm = rowmin(ensibactinfpvm ensiviralinfpvm)
gen byte anybactnotviral = 1 if ensibactinfpvm==ensibactnotviralpvm & anybactinf==1
replace anybactnotviral = 0 if ensiviralinfpvm==ensibactnotviralpvm & anybactnotviral!=1 & anyviralinf==1
sum ensibactnotviralpvm
tab anybactnotviral
tab anybactinf
tab anyviralinf
```

\*Type of viral infection

```
egen ensivirustypepvm = rowmin(ensiherpespvm ensipersviralpvm ensiacuteviralpvm)
gen byte anyvirustype = 1 if ensiherpespvm==ensivirustypepvm & anyviralinf==1 & ensivirustypepvm!=.
replace anyvirustype = 2 if ensipersviralpvm==ensivirustypepvm & anyviralinf==1 & anyvirustype==. &
ensivirustypepvm!=.
```

```
replace anyvirustype = 3 if ensiacuteviralpvm==ensivirustypepvm & anyviralinf==1 & anyvirustype==. &
ensivirustypepvm!=.
```

```
tab anyvirustype
```

```
tab anyviralinf
```

```
sum ensivirustypepvm ensiviralinfpvm
```

```
*viisi tapausta, joilla on virusinfektio, mutta jonka tyyppi ei ole tiedossa.
```

```
*Any persistent viral infection vs acute viral infection
```

```
gen ensiacutenotanypersviralpvm = ensivirustypepvm
```

```
recode anyvirustype 3=1 1=0 2=0, gen(anyacutenotanypersviral)
```

```
*Invasive vs localised
```

```
egen ensisysnotlocalpvm = rowmin(ensisysbactpvm ensilocalbactpvm)
```

```
gen byte anysystnotlocal = 1 if ensisysbactpvm==ensisysnotlocalpvm & anysystbact==1
```

```
replace anysystnotlocal = 0 if ensilocalbactpvm==ensisysnotlocalpvm & anysystnotlocal!=1 & anylocalbact==1
```

```
sum ensisysnotlocalpvm
```

```
tab anysystnotlocal
```

```
tab anysystbact
```

```
tab anylocalbact
```

```
local dg sysnotlocal intranotextrac gramplusnotminus bactnotviral acutenotanypersviral cnsnotcns acutenotchronic
```

```
bactsepsistnotsepsiscnspredispnotpredisp
```

```
local n_dg: word count `dg'
```

```
local dg_name "" "Invasive vs localised bacterial infection" "Intra vs extracellular bacterial infection" "Gram-positive vs gram-  
negative bacterial infection" "Bacterial vs viral infection" "Acute vs any persisten viral infection" "CNS vs extra-CNS infection"  
"Acute vs chronic infection" "Septic vs not septic bacterial infection" "Infection predisposed towards entering the CNS vs not  
predisposed""
```

```
quietly: local irow = 7
```

```
forvalues i=1/'n_dg' {
```

```
preserve
```

```
quietly: local idg : word `i' of `dg'
```

```
quietly: local idg_name : word `i' of `dg_name'
```

```
display ""
```

```
display "`idg' followed by broad dementia, adjusted for sex and education and stratified by
```

```
cohort"
```

```
display ""
```

```
display "Pooled IPD-analysis"
```

```
display ""
```

```
display "$S_TIME $S_DATE"
```

```
display ""
```

```
egen le_`idg' = rowmax(lag_entry_`anyinf' ensi_`idg'pvm)
```

```
gen ensi_`idg'pvm_10y = ensi_`idg'pvm + round(10*365.25)
```

```
egen le_10y_`idg' = rowmax(lag_entry_`anyinf' ensi_`idg'pvm_10y)
```

```
gen byte anyeither = ensi_`idg'pvm !=.
```

```
replace anyeither = . if anyeither==0 & anyanyinf==1
```

```
tab anyeither
```

```
quietly: stset exitpvm, id(id) failure(ensidementia) origin(time syntpvm) enter(time le_`idg')
```

```
scale(365.25)
```

```
quietly: keep id any_`idg' ensi_`idg'pvm supu cohort exitpvm ensidementia syntpvm entrypvm
```

```
ensi_`idg'pvm_10y anyeither ///
```



```

le `idg' le_10y_`idg'_st_d_origin_t_t0 ses

keep if _st==1
gen `idg'_compare =0
replace `idg'_compare = 1 if anyeither==1
tab `idg'_compare
recode `idg'_compare 1=2 if any`idg'==0
tab `idg'_compare
tab any`idg'
tab anyeither
quietly: stdescribe
quietly: local failures = `r(N_fail)'

stcox i.`idg'_compare 2.supu#cohort 2.ses#cohort 3.ses#cohort, strata(cohort)
test 1.`idg'_compare = 2.`idg'_compare

quietly: putexcel set "Pooled results.xlsm", sheet("FIGURE compare dist") modify
quietly: putexcel K`irow'=(`e(N_sub)'), nformat(number)
quietly: putexcel L`irow'=(`e(N_fail)'), nformat(number)
quietly: putexcel E`irow'=(`r(p)'), nformat(number_d2)
quietly: putexcel B`irow'=("`idg'")
quietly: putexcel C`irow'=("pooled")
quietly: putexcel D`irow'=("`idg_name'")

local ++irow

*Dementia occurring from year 10 onwards
stset exitpvm, id(id) failure(ensidementia) origin(time syntpvm) enter(time le_10y_`idg')

scale(365.25)

stdescribe
quietly: local failures = `r(N_fail)'

stcox i.`idg'_compare 2.supu#cohort 2.ses#cohort 3.ses#cohort, strata(cohort)
test 1.`idg'_compare = 2.`idg'_compare

quietly: putexcel set "Pooled results.xlsm", sheet("FIGURE compare dist") modify
quietly: putexcel K`irow'=(`e(N_sub)'), nformat(number)
quietly: putexcel L`irow'=(`e(N_fail)'), nformat(number)
quietly: putexcel E`irow'=(`r(p)'), nformat(number_d2)
quietly: putexcel B`irow'=("`idg'")
quietly: putexcel C`irow'=("pooled")
quietly: putexcel D`irow'=("`idg_name' from year 10 onwards")

local ++irow
local ++irow
restore

}

log close

*Comparing viral infections
capture log close
log using "herpes vs other persistent viral v7.log", replace
local dg herpesnotpersviral
local n_dg: word count `dg'
local dg_name ""Herpesvirus infection vs other potentially persistent viral infection""
quietly: local irow = 40
forvalues i=1/'n_dg' {
preserve
quietly: local idg : word `i' of `dg'

```

```

quietly: local idg_name : word `i' of `dg_name'
display ""
display "`idg' followed by broad dementia, adjusted for sex and education and stratified by
cohort"

display ""
display "Pooled IPD-analysis"
display ""
display "$S_TIME $S_DATE"
display ""

egen le_`idg' = rowmax(lag_entry_anyinf ensi`idg'pvm)
gen ensi`idg'pvm_10y = ensi`idg'pvm + round(10*365.25)
egen le_10y_`idg' = rowmax(lag_entry_anyinf ensi`idg'pvm_10y)

gen byte anyeither = ensi`idg'pvm !=.
replace anyeither = . if anyeither==0 & anyanyinf==1
tab anyeither

quietly: stset exitpvm, id(id) failure(ensidementia) origin(time syntpvm) enter(time le_`idg')
scale(365.25)

quietly: keep id any`idg' ensi`idg'pvm supu cohort exitpvm ensidementia syntpvm entrypvm
ensi`idg'pvm_10y anyeither ///
le_`idg' le_10y_`idg' _st_d _origin_t_t0 ses

keep if _st==1
gen `idg'_compare =0
replace `idg'_compare = 1 if anyeither==1
tab `idg'_compare
recode `idg'_compare 1=2 if any`idg'==0
tab `idg'_compare
tab any`idg'
tab anyeither

quietly: stdescribe
quietly: local failures = `r(N_fail)'

stcox i.`idg'_compare 2.supu#cohort 2.ses#cohort 3.ses#cohort, strata(cohort)
test 1.`idg'_compare = 2.`idg'_compare

quietly: putexcel set "Pooled results.xlsm", sheet("FIGURE compare dist") modify
quietly: putexcel K`irow'=(`e(N_sub)'), nformat(number)
quietly: putexcel L`irow'=(`e(N_fail)'), nformat(number)
quietly: putexcel E`irow'=(`r(p)'), nformat(number_d2)
quietly: putexcel B`irow'=("`idg'")
quietly: putexcel C`irow'=("pooled")
quietly: putexcel D`irow'=("`idg_name'")

local ++irow

*Dementia occurring from year 10 onwards
stset exitpvm, id(id) failure(ensidementia) origin(time syntpvm) enter(time le_10y_`idg')
scale(365.25)

stdescribe
quietly: local failures = `r(N_fail)'

stcox i.`idg'_compare 2.supu#cohort 2.ses#cohort 3.ses#cohort, strata(cohort)
test 1.`idg'_compare = 2.`idg'_compare

quietly: putexcel set "Pooled results.xlsm", sheet("FIGURE compare dist") modify

```

```

quietly: putexcel K`irow'=(`e(N_sub)'), nformat(number)
quietly: putexcel L`irow'=(`e(N_fail)'), nformat(number)
quietly: putexcel E`irow'=(`r(p)'), nformat(number_d2)
quietly: putexcel B`irow'=("`idg'")
quietly: putexcel C`irow'=("pooled")
quietly: putexcel D`irow'=("`idg_name' from year 10 onwards")

local ++irow
local ++irow
restore
}

log close

capture log close
log using "Types of viral infection v7.log", replace

local dg virustype
local n_dg: word count `dg'
local dg_name ""Types of viral infection""
quietly: local irow = 34
    forvalues i=1/'n_dg' {
        preserve
        quietly: local idg : word `i' of `dg'
        quietly: local idg_name : word `i' of `dg_name'
        display ""
        display ""`idg' followed by broad dementia, adjusted for sex and education and stratified by
cohort"
        display ""
        display "Pooled IPD-analysis"
        display ""
        display "$S_TIME $S_DATE"
        display ""

        egen le_`idg' = rowmax(lag_entry_anyinf ensi`idg'pvm)
        gen ensi`idg'pvm_10y = ensi`idg'pvm + round(10*365.25)
        egen le_10y_`idg' = rowmax(lag_entry_anyinf ensi`idg'pvm_10y)

        gen byte anyeither = ensi`idg'pvm !=.
        replace anyeither = . if anyeither==0 & anyanyinf==1
        tab anyeither

        quietly: stset exitpvm, id(id) failure(ensidementia) origin(time syntpvm) enter(time le_`idg')
scale(365.25)
        quietly: keep id any`idg' ensi`idg'pvm supu cohort exitpvm ensidementia syntpvm entrypvm
ensi`idg'pvm_10y anyeither ///
        le_`idg' le_10y_`idg' _st_d_origin_t_t0 ses anyviralinf anyanyinf

        keep if _st==1
        gen `idg'_compare = any`idg' if anyeither==1
        replace `idg'_compare = 0 if anyanyinf==0
        tab `idg'_compare
        tab any`idg'
        tab anyeither

        quietly: stdescribe
        quietly: local failures = `r(N_fail)'

```

```

if "`idg'"=="virustype" {
local comp "viralinf"
replace anyviralinf = . if anyvirustype==.
}
tab any`comp'
stcox i.`idg'_compare 2.supu#cohort 2.ses#cohort 3.ses#cohort, strata(cohort)
test 1.`idg'_compare = 2.`idg'_compare = 3.`idg'_compare

quietly: putexcel set "Pooled results.xlsm", sheet("FIGURE compare dist") modify
        quietly: putexcel K`irow'=(`e(N_sub)'), nformat(number)
        quietly: putexcel L`irow'=(`e(N_fail)'), nformat(number)
        quietly: putexcel E`irow'=(`r(p)'), nformat(number_d2)
        quietly: putexcel B`irow'=("`comp'")
        quietly: putexcel C`irow'=("pooled")
        quietly: putexcel D`irow'=("`idg_name'")
local ++irow

*Dementia occurring from year 10 onwards
quietly: stset exitpvm, id(id) failure(ensidemementia) origin(time syntpvm) enter(time le_10y_`idg')

scale(365.25)

stdescribe
quietly: local failures = `r(N_fail)'

stcox i.`idg'_compare 2.supu#cohort 2.ses#cohort 3.ses#cohort, strata(cohort)
test 1.`idg'_compare = 2.`idg'_compare = 3.`idg'_compare

quietly: putexcel set "Pooled results.xlsm", sheet("FIGURE compare dist") modify
        quietly: putexcel K`irow'=(`e(N_sub)'), nformat(number)
        quietly: putexcel L`irow'=(`e(N_fail)'), nformat(number)
        quietly: putexcel E`irow'=(`r(p)'), nformat(number_d2)
        quietly: putexcel B`irow'=("`idg'")
        quietly: putexcel C`irow'=("pooled")
        quietly: putexcel D`irow'=("`idg_name' from year 10 onwards")
local ++irow
local ++irow
restore
}

log close

***** NUMBER OF INFECTIONS *****

capture log close
log using "P for number of simultaneous infections v7.log", replace

local dg infcount
local n_dg: word count `dg'
local dg_name ""No. of infections""

use "Inf_dem_lag.dta", replace
merge 1:1 id using "Infection count.dta"
tab anyinfcount
recode anyinfcount 3=2 4=2
drop if ses==.
gen ensiinfcountpvm = ensianyinfpvm

```

```

quietly: local irow = 37
    forvalues i=1/\`n_dg' {
        preserve
        quietly: local idg : word `i' of `dg'
        quietly: local idg_name : word `i' of `dg_name'
        display ""
        display "`idg' followed by broad dementia, adjusted for sex and education and stratified by
cohort"

        display ""
        display "Pooled IPD-analysis, normal model and 10-year exclusion"
        display ""
        display "$S_TIME $S_DATE"
        display ""

        quietly: stset exitpvm, id(id) failure(ensidementia) origin(time syntpvm) enter(time
lag_entry_anyinf) scale(365.25)
        quietly: keep id any`idg' supu cohort exitpvm ensidementia syntpvm entrypvm ensi`idg'pvm _st
_d _origin _t _t0 ses ///

        lag_entry_anyinf lag_entry_10y_anyinf
        keep if _st==1
        tab any`idg'

        quietly: stdescribe
        quietly: local failures = `r(N_fail)'
        stcox i.any`idg' 2.supu#cohort 2.ses#cohort 3.ses#cohort, strata(cohort)
        test 1.any`idg' = 2.any`idg'

        quietly: putexcel set "Pooled results.xlsx", sheet("FIGURE compare dist") modify
            quietly: putexcel K`irow'=(`e(N_sub)'), nformat(number)
            quietly: putexcel L`irow'=(`e(N_fail)'), nformat(number)
            quietly: putexcel E`irow'=(`r(p)'), nformat(number_d2)
            quietly: putexcel B`irow'=("`idg'")
            quietly: putexcel C`irow'=("pooled")
            quietly: putexcel D`irow'=("`idg_name'")

        local ++irow

        *Dementia occurring from year 10 onwards
        quietly: stset exitpvm, id(id) failure(ensidementia) origin(time syntpvm) enter(time
lag_entry_10y_anyinf) scale(365.25)

        quietly: stdescribe
        quietly: local failures = `r(N_fail)'
        stcox i.any`idg' 2.supu#cohort 2.ses#cohort 3.ses#cohort, strata(cohort)
        test 1.any`idg' = 2.any`idg'

        quietly: putexcel set "Pooled results.xlsx", sheet("FIGURE compare dist") modify
            quietly: putexcel K`irow'=(`e(N_sub)'), nformat(number)
            quietly: putexcel L`irow'=(`e(N_fail)'), nformat(number)
            quietly: putexcel E`irow'=(`r(p)'), nformat(number_d2)
            quietly: putexcel B`irow'=("`idg'")
            quietly: putexcel C`irow'=("pooled")
            quietly: putexcel D`irow'=("`idg_name' from year 10 onwards")

        local ++irow
        local ++irow
        restore
    }

log close

```

capture log close

log using "HSV vs other herpes v7.log", replace

```
use "Inf_dem_lag.dta", replace
merge 1:1 id using "herpeskoodit.dta"
drop _merge
drop if ses==.
tab anyhsv12
gen anynonhsv = 0 if anyanyinf==0
replace anynonhsv = 1 if anyherpes==1 & anyhsv12!=1
```

```
gen herpes_compare = 1 if anyhsv12==1
replace herpes_compare = 2 if anynonhsv==1
replace herpes_compare = 0 if anyanyinf==0
tab herpes_compare
```

lag\_entry\_herpes) scale(365.25)

```
quietly: stset exitpvm, id(id) failure(ensidementia) origin(time syntpvm) enter(time
```

entrypvm ensiherpespvm ///

```
quietly: keep id anyherpes anyhsv12 anynonhsv supu cohort exitpvm ensidementia syntpvm
```

```
_st_d_origin_t_t0 ses herpes_compare
tab anyherpes
```

```
quietly: stdescribe
```

```
quietly: local failures = `r(N_fail)'
```

```
stcox i.herpes_compare 2.supu#cohort 2.ses#cohort 3.ses#cohort, strata(cohort)
```

```
test 1.herpes_compare=2.herpes_compare
```

log close

capture log close

log using "Type of Gram-positive and Gram-negative infections v7.log", replace

```
quietly: use "Inf_dem_lag.dta", clear
merge 1:1 id using "grampluskoodit.dta"
drop _merge
merge 1:1 id using "gramminus_koodit.dta"
drop _merge
drop if ses==.
```

```
anystreptoc anycdiffic anyothergramplus anysalmoneella anylyme anyothergramminussepsis
```

```
gen gramplus_compare = 0 if anyanyinf==0
replace gramplus_compare = 1 if anystreptoc==1
replace gramplus_compare = 2 if anycdiffic==1
replace gramplus_compare = 3 if anyothergramplus==1
tab anygramplus
tab gramplus_compare
```

```
gen gramminus_compare = 0 if anyanyinf==0
replace gramminus_compare = 1 if anysalmoneella==1
replace gramminus_compare = 2 if anylyme==1
replace gramminus_compare = 3 if anyothergramminussepsis==1 | anyothergramminus==1
tab anygramminus
tab gramminus_compare
```

```
quietly: stset exitpvm, id(id) failure(ensidementia) origin(time syntpvm) enter(time
```

lag\_entry\_gramplus) scale(365.25)

```

quietly: keep id *gram* supu cohort exitpvm ensidementia syntpvm entrypvm _st_d_origin_t
_t0 ses

tab anygramplus if _st==1
tab gramplus_compare if _st==1

stcox i.gramplus_compare 2.supu#cohort 2.ses#cohort 3.ses#cohort, strata(cohort)
test 1.gramplus_compare = 2.gramplus_compare
test 1.gramplus_compare = 3.gramplus_compare
test 2.gramplus_compare = 3.gramplus_compare
test 1.gramplus_compare = 2.gramplus_compare = 3.gramplus_compare

quietly: stset exitpvm, id(id) failure(ensidementia) origin(time syntpvm) enter(time
lag_entry_gramminus) scale(365.25)
quietly: keep id *gram* supu cohort exitpvm ensidementia syntpvm entrypvm _st_d_origin_t
_t0 ses

tab anygramminus if _st==1
tab gramminus_compare if _st==1

stcox i.gramminus_compare 2.supu#cohort 2.ses#cohort 3.ses#cohort, strata(cohort)
test 1.gramminus_compare = 2.gramminus_compare
test 1.gramminus_compare = 3.gramminus_compare
test 2.gramminus_compare = 3.gramminus_compare
test 1.gramminus_compare = 2.gramminus_compare = 3.gramminus_compare

log close

```

\*\*\*\*\* PROPORTIONAL HAZARDS ASSUMPTIONS \*\*\*\*\*

```

capture log close
log using "Proportional hazards assumptions v3.log", replace

```

```

local dg anyinf bactinf sysbact localbact bactsepsis bact_nonsepsis extrac intrac gramplus gramminus viralinf herpes persviral
acuteviral anycns noncns
local n_dg: word count `dg'
local dg_name ""Any infectious disease" "Any bacterial infection" "Invasive bacterial infection" "Localised bacterial infection"
"Bacterial infection with sepsis" "Bacterial infection without sepsis" "Extracellular bacterial infection" "Intracellular bacterial
infection" "Gram-positive bacterial infection" "Gram-negative bacterial infection" "Any viral infection" "Herpesvirus infection"
"Other potentially persistent viral infection" "Acute viral infection" "CNS infection" "Extra-CNS infection""

```

```

quietly: use "Inf_dem_lag.dta", clear
drop if ses==.
egen lag_entry_anycns = rowmax(lag_entry_anyinf ensianycnspvm)
egen lag_entry_noncns = rowmax(lag_entry_anyinf ensinoncnspvm)
replace anyanycns = . if anyanycns==0 & anyanyinf==1
replace anynoncns = . if anynoncns==0 & anyanyinf==1

```

```

quietly: local irow = 7
forvalues i=1/'n_dg' {
quietly: local idg : word `i' of `dg'
quietly: local idg_name : word `i' of `dg_name'
display ""
display "`idg' followed by broad dementia, adjusted for sex and education and stratified by
cohort"

display ""
display "Pooled IPD-analysis, normal model"
display ""

```

```

display "$S_TIME $S_DATE"
display ""

preserve

quietly: stset exitpvm, id(id) failure(ensidementia) origin(time syntpvm) enter(time
lag_entry_`idg') scale(365.25)
keep if _st==1
quietly: keep id any`idg' supu cohort exitpvm ensidementia syntpvm entrypvm ensi`idg'pvm _st
_d _origin _t _t0 ses lag_entry_`idg'
tab any`idg'

quietly: stdescribe
quietly: local failures = `r(N_fail)'
stcox any`idg' 2.supu#cohort 2.ses#cohort 3.ses#cohort, strata(cohort)
matrix r = r(table)
estat phtest, detail
matrix m = r(phtest)
quietly: putexcel set "Pooled results.xlsx", sheet("IPD, PH-assumptions") modify
quietly: putexcel A`irow'="`idg'", nformat(number)
quietly: putexcel B`irow'="`idg_name'", nformat(number)
quietly: putexcel C`irow'=`r(p)', nformat(number_d2)
quietly: putexcel D`irow'=matrix(m[1,4]), nformat(number_d2)
quietly: putexcel E`irow'=matrix(m[2,4]), nformat(number_d2)
quietly: putexcel F`irow'=matrix(m[3,4]), nformat(number_d2)
quietly: putexcel G`irow'=matrix(m[4,4]), nformat(number_d2)
quietly: putexcel H`irow'=matrix(m[5,4]), nformat(number_d2)
quietly: putexcel I`irow'=matrix(m[6,4]), nformat(number_d2)
quietly: putexcel J`irow'=matrix(m[7,4]), nformat(number_d2)
quietly: putexcel K`irow'=matrix(m[8,4]), nformat(number_d2)
quietly: putexcel L`irow'=matrix(m[9,4]), nformat(number_d2)
quietly: putexcel M`irow'=matrix(m[10,4]), nformat(number_d2)
quietly: putexcel N`irow'=matrix(r[1,1]), nformat(number_d2)

local ++irow
restore
}
quietly: local irow = 6

quietly: putexcel set "Pooled results.xlsx", sheet("IPD, PH-assumptions") modify
quietly: putexcel E`irow'="Sex_FPS", nformat(number_d2)
quietly: putexcel F`irow'="Sex_HeSSup", nformat(number_d2)
quietly: putexcel G`irow'="Sex_STW", nformat(number_d2)
quietly: putexcel E`irow'="2.edu_FPS", nformat(number_d2)
quietly: putexcel F`irow'="2.edu_HeSSup", nformat(number_d2)
quietly: putexcel G`irow'="2.edu_STW", nformat(number_d2)
quietly: putexcel E`irow'="3.edu_FPS", nformat(number_d2)
quietly: putexcel F`irow'="3.edu_HeSSup", nformat(number_d2)
quietly: putexcel G`irow'="3.edu_STW", nformat(number_d2)

log close

```

\*any infectious disease, invasive bacterial infections, extracellular bacterial infections, intracellular bacterial infections, Gram-negative bacterial infections, any viral infection, herpesvirus infections, other potentially persistent viral infections and non-cns infections had  $p < 0.05$  which means evidence for the violation of the proportional hazards assumption. Let's draw figures from them:

\*\*\*\*\*Scaled Schoenfeld residuals\*\*\*\*\*



```
capture log close
log using "Scaled Schoenfeld residuals.log", replace
```

\*Scaled schoenfeld residuals -figures:

\*The code below that draws the figures has been modified from:

\*Royston and Lambert: Flexible Parametric Survival Analysis Using Stata: Beyond the Cox Model. Chapter 7.3 What do we mean by a TD effect?

```
local dg anyinf sysbact extrac intrac gramminus viralinf herpes persviral noncns
local n_dg: word count `dg'
local dg_name ""Any infectious disease (vs no infection)" "Invasive bacterial infection (vs no infection)"
"Extracellular bacterial infection (vs no infection)" "Intracellular bacterial infection (vs no infection)" "Gram-negative bacterial
infection (vs no infection)" "Any viral infection (vs no infection)" "Herpesvirus infection (vs no infection)" "Other potentially
persistent viral infection (vs no infection)" "Extra-CNS infection (vs no infection)"
quietly: use "Inf_dem_lag.dta", clear
drop if ses==.
egen lag_entry_anycns = rowmax(lag_entry_anyinf ensianycnspvm)
egen lag_entry_noncns = rowmax(lag_entry_anyinf ensinoncnspvm)
replace anyanycns = . if anyanycns==0 & anyanyinf==1
replace anynoncns = . if anynoncns==0 & anyanyinf==1
drop if ses==.

forvalues i=1/`n_dg' {
    quietly: local idg : word `i' of `dg'
    quietly: local idg_name : word `i' of `dg_name'

    preserve

    local j = 1
    foreach cohort in FPS HeSSup STW {
        gen `cohort'supu=0
        replace `cohort'supu=1 if supu==2 & cohort==`j'
        gen `cohort'ses2=0
        replace `cohort'ses2=1 if ses==2 & cohort==`j'
        gen `cohort'ses3=0
        replace `cohort'ses3=1 if ses==3 & cohort==`j'
        local ++j
    }
    tabulate cohort, gen(dummycohort)

    quietly: stset exitpvm, id(id) failure(ensidementia) origin(time syntpvm) enter(time
lag_entry_`idg') scale(365.25)
    quietly: keep id any`idg' *supu* cohort exitpvm ensidementia syntpvm
    entrypvm ensi`idg'pvm _st_d_origin_t_t0 *ses*
    keep if _st==1
    tab any`idg'

    stcox any`idg' FPSsupu HeSSupsupu STWsupu FPSses2 HeSSupses2 STWses2 FPSses3
HeSSupses3 STWses3, strata(cohort)
    capture drop *sca*
    predict sca*, scaledsch
    running sca1_t if _d==1, gen(smooth_sca) gense(smooth_sca_se) nodraw
    gen smooth_esca = exp(smooth_sca)
    gen smooth_esca_lci = exp(smooth_sca - 1.96*smooth_sca_se)
    gen smooth_esca_uci = exp(smooth_sca + 1.96*smooth_sca_se)
```

```

local betaround: di %7.2f exp(_b[any`idg'])
tokenize "`betaround"
di "`1"
twoway (rarea smooth_esca_lci smooth_esca_uci _t, pstyle(ci) sort yaxis(1 2)) ///
      (line smooth_esca _t, sort clpattern(solid)) ///
      (function y = 1, lpattern(shortdash) range(_t)) ///
      (function y = `1', lpattern(longdash) range(_t)), ///
      legend(order(2 "Exponentiated scaled Schoenfeld residuals" 1 "95% confidence
interval" 4 "Overall hazard ratio ") holes(2) size(small)) ///
      title("`idg_name" "and dementia", size(medsmall)) ///
      ytitle("Exponentiated scaled Schoenfeld residuals", size(small)) ///
      xtitle("Age (years)", size(small)) ///
      yscale(log range(0.1 100)) ///
      scheme(sj) ///
      ylabel(0.1 1 10 100, labsize(medsmall) angle(0)) ///
      ylabel("`1", angle(0) axis(2))
graph save sca_`idg'.gph, replace
graph export sca_`idg'.pdf, as(pdf) replace
restore
}

```

\*Combine the figures:

\*An empty figure that is needed if the number of figures is not divisible by three:

```

scatter cohort supu if _n==1, ysize(3.9) xsize(4.135) scheme(s1color) plotregion(style(none)) yscale(off noline)
xscale(off noline) mcolor(%0) graphregion(color(white))
graph save "sca_.gph", replace

```

```

local dg anyinf sysbact extrac intrac gramminus viralinf herpes persviral noncns
local n_dg: word count `dg'
local i=1
while `i' <= 9 {
    forvalues j=1/3 {
        local k = `i'+`j'-1
        quietly: local dg`j' : word `k' of `dg'
    }
    graph combine sca_`dg1'.gph sca_`dg2'.gph sca_`dg3'.gph, col(1) altshrink scheme(s1color)
    graphregion(color(white)) plotregion(color(gs15)) ysize(8.27) xsize(5.83) // ysize ja xsize A5:n mukaan (tuumina)
    graph export "IPD_sca_`i'.emf", as(emf) replace
    local i = `i'+3
}

log close

```

\*\*\*\*\* TIME-DEPENDENT ANALYSES \*\*\*\*\*

\*\*\*eFIGURE 11 \*\*\*\*\*

\*(time-dependent version of the analyses in FIGURE 2)

```

capture log close
log using "FIGURE 2.log", replace
local dg anyinf bactinf sysbact localbact bactsepsis bact_nonsepsis extrac intrac gramplus gramminus viralinf herpes persviral
acuteviral

```

```

local row 7 10 13 14 16 17 20 21 24 25 28 31 32 33
local n_dg: word count `dg'
local dg_name "" "Any infectious disease vs not" "Any bacterial infection vs not" "Potentially invasive bacterial infection vs not"
"Localised bacterial infection vs not" "Bacterial infection with sepsis vs not" "Bacterial infection without sepsis vs not"
"Extracellular bacterial infection vs not" "Intracellular bacterial infection vs not" "Gram-positive bacterial infection vs not"
"Gram-negative bacterial infection vs not" "Any viral infection vs not" "Herpesvirus (persistent) infection vs not" "Other
persistent viral infection vs not" "Acute viral infection vs not""
    forvalues i=1/'n_dg' {
        quietly: local idg : word `i' of `dg'
        quietly: local idg_name : word `i' of `dg_name'
        quietly: local irow : word `i' of `row'
        display ""
        display "`idg' followed by broad dementia, adjusted for sex and education and stratified by
cohort"

        display ""
        display "Pooled IPD-analysis, normal model and 10-year exclusion"
        display ""
        display "$S_TIME $S_DATE"
        display ""

        quietly: use "Pooled infections_trimmattu", clear
        drop if ses==.
        quietly: stset exitpvm, id(id) failure(ensidementia) origin(time syntpvm) enter(time entrypvm)

scale(365.25)

        quietly: keep id any `idg' supu cohort exitpvm ensidementia syntpvm entrypvm ensi`idg'pvm _st
_d _origin _t _t0 ses

        tab any `idg'
        stsplit `idg'_split, at(0) after(time=ensi`idg'pvm)
        tab `idg'_split
        gen `idg'_timedep =0
        replace `idg'_timedep = 1 if any `idg'==1 & `idg'_split==0
        tab `idg'_timedep
        tab any `idg' if `idg'_split!=-1

        quietly: stdescribe
        quietly: local failures = `r(N_fail)'
        stcox `idg'_timedep 2.supu#cohort 2.ses#cohort 3.ses#cohort, strata(cohort)
        quietly: matrix m = r(table)
        tempname hr ll ul
        scalar `hr' = m[1,1]
        scalar `ll' = m[5,1]
        scalar `ul' = m[6,1]
        quietly: putexcel set "Pooled results.xlsm", sheet("FIGURE 2 revised") modify
            quietly: putexcel K`irow'=(`e(N_sub)'), nformat(number)
            quietly: putexcel L`irow'=(`e(N_fail)'), nformat(number)
            quietly: putexcel E`irow'=(`hr'), nformat(number_d2)
            quietly: putexcel F`irow'=(`ll'), nformat(number_d2)
            quietly: putexcel G`irow'=(`ul'), nformat(number_d2)
            quietly: putexcel B`irow'=("`idg'")
            quietly: putexcel C`irow'=("pooled")
            quietly: putexcel D`irow'=("`idg_name'")
        tab any `idg', matcell(x), if `idg'_split!=-1
        matrix list x
        quietly: tab any `idg' ensidementia, matcell(y), if `idg'_split!=-1 & _d==1
        matrix list y
        quietly: putexcel set "Pooled results.xlsm", sheet("FIGURE 2 revised") modify
            quietly: putexcel M`irow'=(x[2,1]), nformat(number)
            quietly: putexcel N`irow'=(y[2,1]), nformat(number)

```

```

local irow = `irow' + 29

*Dementia occurring from year 10 onwards
gen ensi`idg'pvm10v = ensi`idg'pvm + round(10*365.25) if ensi`idg'pvm<entrypvm
replace ensi`idg'pvm10v = entrypvm if ensi`idg'pvm10v<entrypvm
replace _t0 = (ensi`idg'pvm10v-syntpvm)/365.25 if ensi`idg'pvm10v!=.
replace _t0 = _t0 + 10 if ensi`idg'pvm10v==.
drop if _t0>=_t
quietly: stdescribe
quietly: local failures = `r(N_fail)'
stcox `idg'_timedep 2.supu#cohort 2.ses#cohort 3.ses#cohort, strata(cohort)
quietly: matrix m = r(table)
scalar `hr' = m[1,1]
scalar `ll' = m[5,1]
scalar `ul' = m[6,1]
quietly: putexcel set "Pooled results.xlsx", sheet("FIGURE 2 revised") modify
    quietly: putexcel K`irow'=(`e(N_sub)'), nformat(number)
    quietly: putexcel L`irow'=(`e(N_fail)'), nformat(number)
    quietly: putexcel E`irow'=(`hr'), nformat(number_d2)
    quietly: putexcel F`irow'=(`ll'), nformat(number_d2)
    quietly: putexcel G`irow'=(`ul'), nformat(number_d2)
    quietly: putexcel B`irow'=("`idg'")
    quietly: putexcel C`irow'=("pooled")
    quietly: putexcel D`irow'=("`idg_name'")
tab any`idg', matcell(x), if `idg'_split!=-1
matrix list x
quietly: tab any`idg' ensidementia, matcell(y), if `idg'_split!=-1 & _d==1
matrix list y
quietly: putexcel set "Pooled results.xlsx", sheet("FIGURE 2 revised") modify
    quietly: putexcel M`irow'=(x[2,1]), nformat(number)
    quietly: putexcel N`irow'=(y[2,1]), nformat(number)
}

```

log close

\*\*\*\*\* TIME-DEPENDENT ANALYSES: SINGLE VS MULTIPLE INFECTIONS \*\*\*\*\*

capture log close

log using "Single vs multiple infections.log", replace

local dg\_name ""Multiple infections""

local irow 16

local prow = `irow'

```

quietly: use "Pooled infections_trimmattu", clear
merge 1:1 id using "Coinfections_trimmattu"
drop _merge
drop if ses==.

```

```

scale(365.25)
quietly: stset exitpvm, id(id) failure(ensidementia) origin(time syntpvm) enter(time entrypvm)

```

```

quietly: keep id anyanyinf supu cohort exitpvm ensidementia syntpvm entrypvm
ensi*anyinfpvm *toinen* *kolmas* _st_d_origin_t_t0 ses
sum ensi*anyinfpvm

```

```

stsplit first_split, at(0) after(time=ensianyinfpvm)
gen multiinf_timedep =0

```

```

tab multiinf_timedep
replace multiinf_timedep = 1 if anyanyinf==1 & first_split==0
tab multiinf_timedep
stsplitsplit second_split, at(0) after(time=ensitoinenanyinfpvm)
replace multiinf_timedep = 2 if toinenanyinf==1 & second_split==0
tab multiinf_timedep
stsplitsplit third_split, at(0) after(time=ensikolmasanyinfpvm)
replace multiinf_timedep = 3 if kolmasanyinf==1 & third_split==0
tab multiinf_timedep

quietly: stdescribe
quietly: local failures = `r(N_fail)'
stcox i.multiinf_timedep 2.supu#cohort 2.ses#cohort 3.ses#cohort, strata(cohort)
quietly: matrix m = r(table)
matrix list m
tempname hr1 ll1 ul1 hr2 ll2 ul2 hr3 ll3 ul3
scalar `hr1' = m[1,2]
scalar `ll1' = m[5,2]
scalar `ul1' = m[6,2]
scalar `hr2' = m[1,3]
scalar `ll2' = m[5,3]
scalar `ul2' = m[6,3]
scalar `hr3' = m[1,4]
scalar `ll3' = m[5,4]
scalar `ul3' = m[6,4]

forvalues i =1/3 {
quietly: putexcel set "Pooled results.xlsx", sheet("FIGURE sensitivity") modify
quietly: putexcel K`irow'=(`e(N_sub)'), nformat(number)
quietly: putexcel L`irow'=(`e(N_fail)'), nformat(number)
quietly: putexcel E`irow'=(`hr`i'), nformat(number_d2)
quietly: putexcel F`irow'=(`ll`i'), nformat(number_d2)
quietly: putexcel G`irow'=(`ul`i'), nformat(number_d2)
quietly: putexcel B`irow'=("Multiinf")
quietly: putexcel C`irow'=("pooled")
quietly: putexcel D`irow'=("Single vs multiple infections, infection No. `i'")
tab multiinf_timedep, matcell(x), if first_split!=-1 & second_split!=-1 & third_split!=-1
matrix list x
tab multiinf_timedep ensidementia, matcell(y), if first_split!=-1 & second_split!=-1 &
third_split!=-1 & _d==1

matrix list y
quietly: putexcel set "Pooled results.xlsx", sheet("FIGURE sensitivity") modify
local j = `i' + 1
quietly: putexcel M`irow'=(x[`j',1]), nformat(number)
quietly: putexcel N`irow'=(y[`j',1]), nformat(number)

local ++irow
local ++irow
}
*P for trend
stcox multiinf_timedep 2.supu#cohort 2.ses#cohort 3.ses#cohort, strata(cohort)
quietly: matrix n = r(table)
matrix list n
tempname p
scalar `p' = n[4,1]
quietly: putexcel set "Pooled results.xlsx", sheet("FIGURE sensitivity") modify
quietly: putexcel Q`prow'=(`p'), nformat(number)

```

```

*Dementia occurring from year 10 onwards
local i 1
foreach idg in anyinf toinenanyinf kolmasanyinf {
display `i'
replace _t0 = _t0 + 10 if multiinf_timedep==0 & `i'==1
drop if _t0>=_t
gen ensi`idg'pvm10v = ensi`idg'pvm + round(10*365.25) if ensi`idg'pvm<entrypvm
replace ensi`idg'pvm10v = entrypvm if ensi`idg'pvm10v<entrypvm
replace _t0 = (ensi`idg'pvm10v-syntpvm)/365.25 if ensi`idg'pvm10v!=. & multiinf_timedep==`i'
replace _t0 = _t0 + 10 if ensi`idg'pvm10v==. & multiinf_timedep==`i'
drop if _t0>=_t
local ++i
}

quietly: stdescribe
quietly: local failures = `r(N_fail)'
stcox i.multiinf_timedep 2.supu#cohort 2.ses#cohort 3.ses#cohort, strata(cohort)
quietly: matrix m = r(table)
matrix list m
tempname hr1 ll1 ul1 hr2 ll2 ul2 hr3 ll3 ul3
scalar `hr1' = m[1,2]
scalar `ll1' = m[5,2]
scalar `ul1' = m[6,2]
scalar `hr2' = m[1,3]
scalar `ll2' = m[5,3]
scalar `ul2' = m[6,3]
scalar `hr3' = m[1,4]
scalar `ll3' = m[5,4]
scalar `ul3' = m[6,4]

local irow 17
forvalues i =1/3 {
quietly: putexcel set "Pooled results.xlsm", sheet("FIGURE sensitivity") modify
quietly: putexcel K`irow'=(`e(N_sub)'), nformat(number)
quietly: putexcel L`irow'=(`e(N_fail)'), nformat(number)
quietly: putexcel E`irow'=(`hr`i'), nformat(number_d2)
quietly: putexcel F`irow'=(`ll`i'), nformat(number_d2)
quietly: putexcel G`irow'=(`ul`i'), nformat(number_d2)
quietly: putexcel B`irow'=("Multiinf")
quietly: putexcel C`irow'=("pooled")
quietly: putexcel D`irow'=("Dementia occurring more than 10 years after the
hospitalisation, infection No. `i'")
tab multiinf_timedep, matcell(x), if first_split!=-1 & second_split!=-1 & third_split!=-1
matrix list x
tab multiinf_timedep ensidementia, matcell(y), if first_split!=-1 & second_split!=-1 &
third_split!=-1 & _d==1

matrix list y
quietly: putexcel set "Pooled results.xlsm", sheet("FIGURE sensitivity") modify
local j = `i' + 1
quietly: putexcel M`irow'=(x[`,j],1]), nformat(number)
quietly: putexcel N`irow'=(y[`,j],1]), nformat(number)

local ++irow
local ++irow
}

*P for trend
local ++prow
stcox multiinf_timedep 2.supu#cohort 2.ses#cohort 3.ses#cohort, strata(cohort)

```

```

quietly: matrix n = r(table)
matrix list n
tempname p
scalar `p' = n[4,1]
quietly: putexcel set "Pooled results.xlsx", sheet("FIGURE sensitivity") modify
quietly: putexcel Q`prow'=(`p'), nformat(number)

```

log close

\*\*\*\*\* TIME-DEPENDENT ANALYSES: One or several different pathogens \*\*\*\*\*

capture log close

log using "One vs at least two different pathogens.log", replace

local dg\_name `""Multiple organisms""'

local irow 82

local prow = `irow'

```

quietly: use "Pooled infections_trimmattu", clear
drop if ses==.

```

```
egen ensibactviralpvm = rowmin(ensibactinfpvm ensiviralinfpvm)
```

```
gen toinenbactviralpvm = ensibactviralpvm if ensibactinfpvm==ensiviralinfpvm &
```

ensibactinfpvm!=.

```
replace toinenbactviralpvm = ensibactinfpvm if ensibactinfpvm>ensiviralinfpvm &
```

ensibactinfpvm!=.

```
replace toinenbactviralpvm = ensiviralinfpvm if ensiviralinfpvm>ensibactinfpvm &
```

ensiviralinfpvm!=.

```
gen anybactviral = 1 if ensibactviralpvm!=.
```

```
gen toinenbactviral = 1 if toinenbactviralpvm!=.
```

```
quietly: stset exitpvm, id(id) failure(ensidementia) origin(time syntpvm) enter(time entrypvm)
```

scale(365.25)

```
quietly: keep id anybactviral supu cohort exitpvm ensidementia syntpvm entrypvm ensi*pvm
```

\*toinen\* \_st\_d\_origin\_t\_t0 ses

```
sum ensibactviralpvm toinenbactviralpvm
```

```
tab anybactviral
```

```
tab toinenbactviral
```

```
stsplit first_split, at(0) after(time=ensibactviralpvm)
```

```
gen multiinf_timedep = 0
```

```
tab multiinf_timedep
```

```
replace multiinf_timedep = 1 if anybactviral==1 & first_split==0
```

```
tab multiinf_timedep
```

```
stsplit second_split, at(0) after(time=toinenbactviralpvm)
```

```
replace multiinf_timedep = 2 if toinenbactviral==1 & second_split==0
```

```
tab multiinf_timedep
```

```
*browse id ensibactviralpvm toinenbactviralpvm multiinf_timedep _t0 _t
```

```
quietly: stdescribe
```

```
quietly: local failures = `r(N_fail)'
```

```
stcox i.multiinf_timedep 2.supu#cohort 2.ses#cohort 3.ses#cohort, strata(cohort)
```

```
quietly: matrix m = r(table)
```

```
matrix list m
```

```
tempname hr1 ll1 ul1 hr2 ll2 ul2
```

```
scalar `hr1' = m[1,2]
```

```
scalar `ll1' = m[5,2]
```

```
scalar `ul1' = m[6,2]
```

```
scalar `hr2' = m[1,3]
```

```

scalar `ll2' = m[5,3]
scalar `ul2' = m[6,3]

forvalues i =1/2 {
quietly: putexcel set "Pooled results.xlsm", sheet("FIGURE sensitivity") modify
    quietly: putexcel K`irow'=(`e(N_sub)'), nformat(number)
    quietly: putexcel L`irow'=(`e(N_fail)'), nformat(number)
    quietly: putexcel E`irow'=(`hr`i'), nformat(number_d2)
    quietly: putexcel F`irow'=(`ll`i'), nformat(number_d2)
    quietly: putexcel G`irow'=(`ul`i'), nformat(number_d2)
    quietly: putexcel B`irow'=("`idg_name`")
    quietly: putexcel C`irow'=("pooled")
    quietly: putexcel D`irow'=("Different micro-organisms, infection No. `i'")
tab multiinf_timedep, matcell(x), if first_split!=-1 & second_split!=-1
matrix list x
tab multiinf_timedep ensidementia, matcell(y), if first_split!=-1 & second_split!=-1 & _d==1
matrix list y
quietly: putexcel set "Pooled results.xlsm", sheet("FIGURE sensitivity") modify
    local j = `i' + 1
    quietly: putexcel M`irow'=(x[`j',1]), nformat(number)
    quietly: putexcel N`irow'=(y[`j',1]), nformat(number)

local ++irow
local ++irow
}
*P for trend
stcox multiinf_timedep 2.supu#cohort 2.ses#cohort 3.ses#cohort, strata(cohort)
quietly: matrix n = r(table)
matrix list n
tempname p
scalar `p' = n[4,1]
quietly: putexcel set "Pooled results.xlsm", sheet("FIGURE sensitivity") modify
    quietly: putexcel Q`prow'=(`p'), nformat(number)

*Dementia occurring from year 10 onwards
local i 1
foreach idg in ensibactviral toinenbactviral {
display `i'
replace _t0 = _t0 + 10 if multiinf_timedep==0 & `i'==1
drop if _t0>=_t
gen `idg'pvm10v = `idg'pvm + round(10*365.25) if `idg'pvm<entrypvm
replace `idg'pvm10v = entrypvm if `idg'pvm10v<entrypvm
replace _t0 = (`idg'pvm10v-syntpvm)/365.25 if `idg'pvm10v!=. & multiinf_timedep==`i'
replace _t0 = _t0 + 10 if `idg'pvm10v==. & multiinf_timedep==`i'
drop if _t0>=_t
local ++i
}

quietly: stdescribe
quietly: local failures = `r(N_fail)'
stcox i.multiinf_timedep 2.supu#cohort 2.ses#cohort 3.ses#cohort, strata(cohort)
quietly: matrix m = r(table)
matrix list m
tempname hr1 ll1 ul1 hr2 ll2 ul2
scalar `hr1' = m[1,2]
scalar `ll1' = m[5,2]
scalar `ul1' = m[6,2]
scalar `hr2' = m[1,3]

```



```

scalar `ll2' = m[5,3]
scalar `ul2' = m[6,3]

```

```

local irow 83
forvalues i =1/2 {
quietly: putexcel set "Pooled results.xlsm", sheet("FIGURE sensitivity") modify
quietly: putexcel K`irow'=(`e(N_sub)'), nformat(number)
quietly: putexcel L`irow'=(`e(N_fail)'), nformat(number)
quietly: putexcel E`irow'=(`hr`i'), nformat(number_d2)
quietly: putexcel F`irow'=(`ll`i'), nformat(number_d2)
quietly: putexcel G`irow'=(`ul`i'), nformat(number_d2)
quietly: putexcel B`irow'=("`idg_name")
quietly: putexcel C`irow'=("pooled")
quietly: putexcel D`irow'=("Dementia occurring more than 10 years after the

```

hospitalisation, infection No. `i'")

```

tab multiinf_timedep, matcell(x), if first_split!=-1 & second_split!=-1
matrix list x
tab multiinf_timedep ensidementia, matcell(y), if first_split!=-1 & second_split!=-1 &_d==1
matrix list y
quietly: putexcel set "Pooled results.xlsm", sheet("FIGURE sensitivity") modify
local j = `i' + 1
quietly: putexcel M`irow'=(x[`j',1]), nformat(number)
quietly: putexcel N`irow'=(y[`j',1]), nformat(number)

```

```

local ++irow
local ++irow
}

```

```

*P for trend
local ++prow
stcox multiinf_timedep 2.supu#cohort 2.ses#cohort 3.ses#cohort, strata(cohort)
quietly: matrix n = r(table)
matrix list n
tempname p
scalar `p' = n[4,1]
quietly: putexcel set "Pooled results.xlsm", sheet("FIGURE sensitivity") modify
quietly: putexcel Q`prow'=(`p'), nformat(number)

```

log close

\*\*\*\*\* TIME-DEPENDENT ANALYSES: NUMBER OF SIMULTANEOUS INFECTIONS \*\*\*\*\*

```

capture log close
log using "Number of infections.log", replace

```

```

local dg infcount
local n_dg: word count `dg'
local dg_name ""No. of infections""

```

```

quietly: use "Pooled infections_trimmattu", clear
merge 1:1 id using "Infection count.dta"
tab anyinfcount
replace anyinfcount=0 if anyanyinf==0
recode anyinfcount 3=2 4=2
drop if ses==.
gen ensiinfcountpvm = ensianyinfpvm

```

```

quietly: local irow = 23
quietly: local prow = `irow'
    forvalues i=1/`n_dg' {
        preserve
        quietly: local idg : word `i' of `dg'
        quietly: local idg_name : word `i' of `dg_name'
        display ""
        display ""`idg' followed by broad dementia, adjusted for sex and education and stratified by
cohort"
        display ""
        display "Pooled IPD-analysis, normal model and 10-year exclusion"
        display ""
        display "$S_TIME $S_DATE"
        display ""

        quietly: stset exitpvm, id(id) failure(ensidementia) origin(time syntpvm) enter(time entrypvm)
scale(365.25)
        quietly: keep id any`idg' supu cohort exitpvm ensidementia syntpvm entrypvm ensi`idg'pvm _st
_d _origin _t _t0 ses

        tab any`idg'
        stsplit `idg'_split, at(0) after(time=ensi`idg'pvm)
        tab `idg'_split
        gen `idg'_timedep =0
        replace `idg'_timedep = any`idg' if inlist(any`idg',1,2,3) & `idg'_split==0
        tab `idg'_timedep
        tab any`idg' if `idg'_split!=-1

        quietly: stdescribe
        quietly: local failures = `r(N_fail)'
        stcox i.`idg'_timedep 2.supu#cohort 2.ses#cohort 3.ses#cohort, strata(cohort)
        quietly: matrix m = r(table)
        matrix list m
        tempname hr1 ll1 ul1 hr2 ll2 ul2 hr3 ll3 ul3
        scalar `hr1' = m[1,2]
        scalar `ll1' = m[5,2]
        scalar `ul1' = m[6,2]
        scalar `hr2' = m[1,3]
        scalar `ll2' = m[5,3]
        scalar `ul2' = m[6,3]
        scalar `hr3' = m[1,4]
        scalar `ll3' = m[5,4]
        scalar `ul3' = m[6,4]

        forvalues i =1/2 {
            quietly: putexcel set "Pooled results.xlsx", sheet("FIGURE sensitivity") modify
                quietly: putexcel K`irow'=(`e(N_sub)'), nformat(number)
                quietly: putexcel L`irow'=(`e(N_fail)'), nformat(number)
                quietly: putexcel E`irow'=(`hr`i'), nformat(number_d2)
                quietly: putexcel F`irow'=(`ll`i'), nformat(number_d2)
                quietly: putexcel G`irow'=(`ul`i'), nformat(number_d2)
                quietly: putexcel B`irow'=("Simultaneous infection diagnoses")
                quietly: putexcel C`irow'=("pooled")
                quietly: putexcel D`irow'=("No. of simultaneous infection diagnoses = `i'")
            tab `idg'_timedep, matcell(x), if `idg'_split!=-1
            matrix list x
            tab `idg'_timedep ensidementia, matcell(y), if `idg'_split!=-1
            matrix list y
            quietly: putexcel set "Pooled results.xlsx", sheet("FIGURE sensitivity") modify

```

```

                                local j = `i' + 1
                                quietly: putexcel M`irow'=(x[`j',1]), nformat(number)
                                quietly: putexcel N`irow'=(y[`j',1]), nformat(number)
local ++irow
local ++irow
}

*P for trend
stcox `idg'_timedep 2.supu#cohort 2.ses#cohort 3.ses#cohort, strata(cohort)
quietly: matrix n = r(table)
matrix list n
tempname p
scalar `p' = n[4,1]
quietly: putexcel set "Pooled results.xlsm", sheet("FIGURE sensitivity") modify
quietly: putexcel Q`prow'=(`p'), nformat(number)

local irow 24
*Dementia occurring from year 10 onwards
gen ensi`idg'pvm10v = ensi`idg'pvm + round(10*365.25) if ensi`idg'pvm<entrypvm
replace ensi`idg'pvm10v = entrypvm if ensi`idg'pvm10v<entrypvm
replace _t0 = (ensi`idg'pvm10v-syntpvm)/365.25 if ensi`idg'pvm10v!=.
replace _t0 = _t0 + 10 if ensi`idg'pvm10v==.
drop if _t0>=_t

quietly: stdescribe
quietly: local failures = `r(N_fail)'
stcox i.`idg'_timedep 2.supu#cohort 2.ses#cohort 3.ses#cohort, strata(cohort)
quietly: matrix m = r(table)
matrix list m
tempname hr1 ll1 ul1 hr2 ll2 ul2 hr3 ll3 ul3
scalar `hr1' = m[1,2]
scalar `ll1' = m[5,2]
scalar `ul1' = m[6,2]
scalar `hr2' = m[1,3]
scalar `ll2' = m[5,3]
scalar `ul2' = m[6,3]
scalar `hr3' = m[1,4]
scalar `ll3' = m[5,4]
scalar `ul3' = m[6,4]

forvalues i =1/3 {
quietly: putexcel set "Pooled results.xlsm", sheet("FIGURE sensitivity") modify
quietly: putexcel K`irow'=(`e(N_sub)'), nformat(number)
quietly: putexcel L`irow'=(`e(N_fail)'), nformat(number)
quietly: putexcel E`irow'=(`hr`i)'), nformat(number_d2)
quietly: putexcel F`irow'=(`ll`i)'), nformat(number_d2)
quietly: putexcel G`irow'=(`ul`i)'), nformat(number_d2)
quietly: putexcel B`irow'=("Simultaneous infection diagnoses")
quietly: putexcel C`irow'=("pooled")
quietly: putexcel D`irow'=("No. of simultaneous infection diagnoses = `i'")
tab `idg'_timedep, matcell(x), if `idg'_split!=-1
matrix list x
tab `idg'_timedep ensidementia, matcell(y), if `idg'_split!=-1
matrix list y
quietly: putexcel set "Pooled results.xlsm", sheet("FIGURE sensitivity") modify
                                local j = `i' + 1
                                quietly: putexcel M`irow'=(x[`j',1]), nformat(number)
                                quietly: putexcel N`irow'=(y[`j',1]), nformat(number)

```

```

        local ++irow
        local ++irow
    }
    *P for trend
    local ++prow
    stcox `idg'_timedep 2.supu#cohort 2.ses#cohort 3.ses#cohort, strata(cohort)
    quietly: matrix n = r(table)
    matrix list n
    tempname p
    scalar `p' = n[4,1]
    quietly: putexcel set "Pooled results.xlsx", sheet("FIGURE sensitivity") modify
        quietly: putexcel Q`prow'=(`p'), nformat(number)

    restore
    }

log close

***** TIME-DEPENDENT ANALYSES: FIGURE sensitivity, CNS vs other infections
capture log close
log using "Sensitivity, CNS infection vs other infection.log", replace
local dg anycns noncns
local n_dg: word count `dg'
local dg_name ""Any CNS infection vs not" "Any extra-CNS infection vs not""

        quietly: use "Pooled infections_trimmattu", clear
        drop if ses==.

quietly: local irow = 46
        forvalues i=1/`n_dg' {
            preserve
            quietly: local idg : word `i' of `dg'
            quietly: local idg_name : word `i' of `dg_name'
            display ""
            display ""`idg' followed by broad dementia, adjusted for sex and education and stratified by
cohort"

            display ""
            display "Pooled IPD-analysis, normal model and 10-year exclusion"
            display ""
            display "$S_TIME $S_DATE"
            display ""

            quietly: stset exitpvm, id(id) failure(ensidementia) origin(time syntpvm) enter(time entrypvm)

scale(365.25)

            quietly: keep id any`idg' supu cohort exitpvm ensidementia syntpvm entrypvm ensi`idg'pvm _st
_d _origin _t _t0 ses

            tab any`idg'
            stsplit `idg'_split, at(0) after(time=ensi`idg'pvm)
            tab `idg'_split
            gen `idg'_timedep =0
            replace `idg'_timedep = 1 if any`idg'==1 & `idg'_split==0
            tab `idg'_timedep
            tab any`idg' if `idg'_split!=-1

            quietly: stdescribe
            quietly: local failures = `r(N_fail)'
            stcox `idg'_timedep 2.supu#cohort 2.ses#cohort 3.ses#cohort, strata(cohort)
            quietly: matrix m = r(table)

```

```

tempname hr ll ul
scalar `hr' = m[1,1]
scalar `ll' = m[5,1]
scalar `ul' = m[6,1]
quietly: putexcel set "Pooled results.xlsm", sheet("FIGURE sensitivity") modify
    quietly: putexcel K`irow'=(`e(N_sub)'), nformat(number)
    quietly: putexcel L`irow'=(`e(N_fail)'), nformat(number)
    quietly: putexcel E`irow'=(`hr'), nformat(number_d2)
    quietly: putexcel F`irow'=(`ll'), nformat(number_d2)
    quietly: putexcel G`irow'=(`ul'), nformat(number_d2)
    quietly: putexcel B`irow'=("`idg'")
    quietly: putexcel C`irow'=("pooled")
    quietly: putexcel D`irow'=("`idg_name'")
tab any`idg', matcell(x), if `idg'_split!=-1
matrix list x
quietly: tab any`idg' ensidementia, matcell(y), if `idg'_split!=-1 & _d==1
matrix list y
quietly: putexcel set "Pooled results.xlsm", sheet("FIGURE sensitivity") modify
    quietly: putexcel M`irow'=(x[2,1]), nformat(number)
    quietly: putexcel N`irow'=(y[2,1]), nformat(number)

local ++irow

*Dementia occurring from year 10 onwards
gen ensi`idg'pvm10v = ensi`idg'pvm + round(10*365.25) if ensi`idg'pvm<entrypvm
replace ensi`idg'pvm10v = entrypvm if ensi`idg'pvm10v<entrypvm
replace _t0 = (ensi`idg'pvm10v-syntpvm)/365.25 if ensi`idg'pvm10v!=.
replace _t0 = _t0 + 10 if ensi`idg'pvm10v==.
drop if _t0>=_t
quietly: stdescribe
quietly: local failures = `r(N_fail)'
stcox `idg'_timedep 2.supu#cohort 2.ses#cohort 3.ses#cohort, strata(cohort)
quietly: matrix m = r(table)
scalar `hr' = m[1,1]
scalar `ll' = m[5,1]
scalar `ul' = m[6,1]
quietly: putexcel set "Pooled results.xlsm", sheet("FIGURE sensitivity") modify
    quietly: putexcel K`irow'=(`e(N_sub)'), nformat(number)
    quietly: putexcel L`irow'=(`e(N_fail)'), nformat(number)
    quietly: putexcel E`irow'=(`hr'), nformat(number_d2)
    quietly: putexcel F`irow'=(`ll'), nformat(number_d2)
    quietly: putexcel G`irow'=(`ul'), nformat(number_d2)
    quietly: putexcel B`irow'=(" `idg'_10y_exclusion")
    quietly: putexcel C`irow'=("pooled")
    quietly: putexcel D`irow'=(" Dementia occurring more than 10 years after the
hospitalisation")

tab any`idg', matcell(x), if `idg'_split!=-1
matrix list x
quietly: tab any`idg' ensidementia, matcell(y), if `idg'_split!=-1 & _d==1
matrix list y
quietly: putexcel set "Pooled results.xlsm", sheet("FIGURE sensitivity") modify
    quietly: putexcel M`irow'=(x[2,1]), nformat(number)
    quietly: putexcel N`irow'=(y[2,1]), nformat(number)

local ++irow
local ++irow
restore
}

```

log close

version 16

\*\*\*\*\* TIME-DEPENDENT ANALYSES: Test for difference between infections

capture log close

log using "Test for difference.log", replace

quietly: use "Pooled infections\_trimmattu", clear  
drop if ses==.

\*Intra vs extracellular

egen ensiintranotextracpvm = rowmin(ensiiintracpvm ensiextracpvm)

replace ensiintranotextracpvm = . if ensiiintracpvm==ensiextracpvm

gen byte anyintranotextrac = 1 if ensiiintracpvm==ensiiintranotextracpvm & ensiiintranotextracpvm!=.

replace anyintranotextrac = 0 if ensiextracpvm==ensiiintranotextracpvm & ensiiintranotextracpvm!=. &

anyintranotextrac!=1

sum ensiiintranotextracpvm

tab anyintranotextrac

tab anyintrac

tab anyextrac

\*Gram+ vs gram-

egen ensigramplusnotminuspvm = rowmin(ensigrampluspvm ensigramminuspvm)

replace ensigramplusnotminuspvm = . if ensigrampluspvm==ensigramminuspvm

gen byte anygramplusnotminus = 1 if ensigrampluspvm==ensigramplusnotminuspvm &

ensigramplusnotminuspvm!=.

replace anygramplusnotminus = 0 if ensigramminuspvm==ensigramplusnotminuspvm &

ensigramplusnotminuspvm!=. & anygramplusnotminus!=1

sum ensigramplusnotminuspvm

tab anygramplusnotminus

tab anygramplus

tab anygramminus

\*Bacterial infection with sepsis vs without sepsis

gen byte anybactsepsisnotsepsis = 1 if ensibactsepsispvm==ensibactinfpvm & anybactsepsis==1

replace anybactsepsisnotsepsis = 0 if ensibact\_nonsepsispvm==ensibactinfpvm & anybactsepsisnotsepsis!=1 &

anybact\_nonsepsis==1

gen ensibactsepsisnotsepsispvm = ensibactinfpvm

sum ensibactsepsisnotsepsispvm

tab anybactsepsisnotsepsis

tab anybact\_nonsepsis

tab anybactsepsis

\*CNS infection vs non cns infection

gen byte anycnsnotcns = 1 if ensianycnspvm==ensianyinfpvm & anyanycns==1

replace anycnsnotcns = 0 if ensinoncnspvm==ensianyinfpvm & anycnsnotcns!=1 & anynoncns==1

gen ensicnsnotcnspvm = ensianyinfpvm

sum ensicnsnotcnspvm

tab anycnsnotcns

tab anyanycns

tab anynoncns

\*Herpesvirus vs persistent viral infection

egen ensiherpesnotpersviralpvm = rowmin(ensiherpespvm ensipersviralpvm)

gen byte anyherpesnotpersviral = 1 if ensiherpespvm==ensiherpesnotpersviralpvm & anyherpes==1

replace anyherpesnotpersviral = 0 if ensipersviralpvm==ensiherpesnotpersviralpvm & anyherpesnotpersviral!=1 & anypersviral==1

sum ensiherpesnotpersviralpvm  
tab anyherpesnotpersviral  
tab anyherpes  
tab anypersviral

\*Herpesvirus vs acute viral infection

egen ensiherpesnotacuteviralpvm = rowmin(ensiherpespvm ensiacuteviralpvm)  
gen byte anyherpesnotacuteviral = 1 if ensiherpespvm==ensiherpesnotacuteviralpvm & anyherpes==1  
replace anyherpesnotacuteviral = 0 if ensiacuteviralpvm==ensiherpesnotacuteviralpvm &

anyherpesnotacuteviral!=1 & anyacuteviral==1

sum ensiherpesnotacuteviralpvm  
tab anyherpesnotacuteviral  
tab anyherpes  
tab anyacuteviral

\*Non herpes persistent vs acute viral infection

egen ensipersnotacuteviralpvm = rowmin(ensipersviralpvm ensiacuteviralpvm)  
gen byte anypersnotacuteviral = 1 if ensipersviralpvm==ensipersnotacuteviralpvm & anypersviral==1  
replace anypersnotacuteviral = 0 if ensiacuteviralpvm==ensipersnotacuteviralpvm & anypersnotacuteviral!=1 &

anyacuteviral==1

sum ensipersnotacuteviralpvm  
tab anypersnotacuteviral  
tab anypersviral  
tab anyacuteviral

\*Bacteria vs viruses

egen ensibactnotviralpvm = rowmin(ensibactinfpvm ensiviralinfpvm)  
gen byte anybactnotviral = 1 if ensibactinfpvm==ensibactnotviralpvm & anybactinf==1  
replace anybactnotviral = 0 if ensiviralinfpvm==ensibactnotviralpvm & anybactnotviral!=1 & anyviralinf==1  
sum ensibactnotviralpvm  
tab anybactnotviral  
tab anybactinf  
tab anyviralinf

\*Type of viral infection

egen ensivirustypepvm = rowmin(ensiherpespvm ensipersviralpvm ensiacuteviralpvm)  
gen byte anyvirustype = 1 if ensiherpespvm==ensivirustypepvm & anyviralinf==1 & ensivirustypepvm!=.  
replace anyvirustype = 2 if ensipersviralpvm==ensivirustypepvm & anyviralinf==1 & anyvirustype==. &

ensivirustypepvm!=.

replace anyvirustype = 3 if ensiacuteviralpvm==ensivirustypepvm & anyviralinf==1 & anyvirustype==. &

ensivirustypepvm!=.

tab anyvirustype  
tab anyviralinf  
sum ensivirustypepvm ensiviralinfpvm

\*viisi tapausta, joilla on virusinfektio, mutta jonka tyyppi ei ole tiedossa.

\*Any persistent viral infection vs acute viral infection

gen ensiacutenotanypersviralpvm = ensivirustypepvm  
recode anyvirustype 3=1 1=0 2=0, gen(anyacutenotanypersviral)

\*Invasive vs localised

egen ensisysnotlocalpvm = rowmin(ensisysbactpvm ensilocalbactpvm)  
gen byte anysystnotlocal = 1 if ensisysbactpvm==ensisysnotlocalpvm & anysystbact==1  
replace anysystnotlocal = 0 if ensilocalbactpvm==ensisysnotlocalpvm & anysystnotlocal!=1 & anylocalbact==1  
sum ensisysnotlocalpvm

```

tab anysystotlocal
tab anysystbact
tab anylocalbact

```

```

local dg systotlocal intranotextrac gramplusnotminus bactnotviral acutenotanypersviral cnsnotcns bactsepsisnotsepsis
local n_dg: word count `dg'
local dg_name "" "Invasive vs localised bacterial infection" "Intra vs extracellular bacterial infection" "Gram-positive vs gram-
negative bacterial infection" "Bacterial vs viral infection" "Acute vs any persisten viral infection" "CNS vs extra-CNS infection"
"Septic vs not septic bacterial infection""
quietly: local irow = 7
    forvalues i=1/`n_dg' {
        preserve
        quietly: local idg : word `i' of `dg'
        quietly: local idg_name : word `i' of `dg_name'
        display ""
        display "`idg' followed by broad dementia, adjusted for sex and education and stratified by
cohort"

        display ""
        display "Pooled IPD-analysis"
        display ""
        display "$S_TIME $S_DATE"
        display ""

        quietly: stset exitpvm, id(id) failure(ensidementia) origin(time syntpvm) enter(time entrypvm)
scale(365.25)
        quietly: keep id any `idg' ensi `idg'pvm supu cohort exitpvm ensidementia syntpvm entrypvm
ensi `idg'pvm _st _d _origin _t _t0 ses

        gen byte anyeither = ensi `idg'pvm !=.
        tab any `idg'
        tab anyeither

        stsplit `idg'_split, at(0) after(time=ensi `idg'pvm)
        tab `idg'_split
        gen `idg'_timedep =0
        replace `idg'_timedep = 1 if anyeither==1 & `idg'_split==0
        tab `idg'_timedep
        tab anyeither if `idg'_split!=-1

        quietly: stdescribe
        quietly: local failures = `r(N_fail)'

        tab anyeither if `idg'_split!=-1
        tab `idg'_timedep
        recode `idg'_timedep 1=2 if any `idg'==0
        tab `idg'_timedep
        stcox i.`idg'_timedep 2.supu#cohort 2.ses#cohort 3.ses#cohort, strata(cohort)
        test 1.`idg'_timedep = 2.`idg'_timedep

        quietly: putexcel set "Pooled results.xlsx", sheet("FIGURE compare") modify
        quietly: putexcel K`irow'=(`e(N_sub)'), nformat(number)
        quietly: putexcel L`irow'=(`e(N_fail)'), nformat(number)
        quietly: putexcel E`irow'=(`r(p)'), nformat(number_d2)

```



```

quietly: putexcel B`irow'=("`idg'")
quietly: putexcel C`irow'=("pooled")
quietly: putexcel D`irow'=("`idg_name'")
local ++irow

*Dementia occurring from year 10 onwards
gen ensi`idg'pvm10v = ensi`idg'pvm + round(10*365.25) if ensi`idg'pvm<entrypvm
replace ensi`idg'pvm10v = entrypvm if ensi`idg'pvm10v<entrypvm
replace _t0 = (ensi`idg'pvm10v-syntpvm)/365.25 if ensi`idg'pvm10v!=.
replace _t0 = _t0 + 10 if ensi`idg'pvm10v==.
drop if _t0>=_t
stdescribe
quietly: local failures = `r(N_fail)'

stcox i.`idg'_timedep 2.supu#cohort 2.ses#cohort 3.ses#cohort, strata(cohort)
test 1.`idg'_timedep = 2.`idg'_timedep

quietly: putexcel set "Pooled results.xlsx", sheet("FIGURE compare") modify
quietly: putexcel K`irow'=(`e(N_sub)'), nformat(number)
quietly: putexcel L`irow'=(`e(N_fail)'), nformat(number)
quietly: putexcel E`irow'=(`r(p)'), nformat(number_d2)
quietly: putexcel B`irow'=("`idg'")
quietly: putexcel C`irow'=("pooled")
quietly: putexcel D`irow'=("`idg_name' from year 10 onwards")

local ++irow
local ++irow
restore
}

log close

*Comparing viral infections
capture log close
log using "herpes vs other persistent viral.log", replace
local dg herpesnotpersviral
local n_dg: word count `dg'
local dg_name ""Herpesvirus infection vs other potentially persistent viral infection""
quietly: local irow = 40
forvalues i=1/'n_dg' {
preserve
quietly: local idg : word `i' of `dg'
quietly: local idg_name : word `i' of `dg_name'
display ""
display ""`idg' followed by broad dementia, adjusted for sex and education and stratified by
cohort"

display ""
display "Pooled IPD-analysis"
display ""
display "$S_TIME $S_DATE"
display ""

quietly: stset exitpvm, id(id) failure(ensidementia) origin(time syntpvm) enter(time entrypvm)
scale(365.25)
quietly: keep id any`idg' ensi`idg'pvm supu cohort exitpvm ensidementia syntpvm entrypvm
ensi`idg'pvm _st_d_origin_t_t0 ses

gen byte anyeither = ensi`idg'pvm !=.

```

```

tab any`idg'
tab anyeither

stsplit `idg'_split, at(0) after(time=ens`idg'pvm)
tab `idg'_split
gen `idg'_timedep =0
replace `idg'_timedep = 1 if anyeither==1 & `idg'_split==0
tab `idg'_timedep
tab anyeither if `idg'_split!=-1

quietly: stdescribe
quietly: local failures = `r(N_fail)'

tab anyeither if `idg'_split!=-1
tab `idg'_timedep
recode `idg'_timedep 1=2 if any`idg'==0
tab `idg'_timedep
stcox i.`idg'_timedep 2.supu#cohort 2.ses#cohort 3.ses#cohort, strata(cohort)
test 1.`idg'_timedep = 2.`idg'_timedep

quietly: putexcel set "Pooled results.xlsx", sheet("FIGURE compare") modify
quietly: putexcel K`irow'=(`e(N_sub)'), nformat(number)
quietly: putexcel L`irow'=(`e(N_fail)'), nformat(number)
quietly: putexcel E`irow'=(`r(p)'), nformat(number_d2)
quietly: putexcel B`irow'=("`idg'")
quietly: putexcel C`irow'=("pooled")
quietly: putexcel D`irow'=("`idg_name'")

local ++irow

*Dementia occurring from year 10 onwards
gen ens`idg'pvm10v = ens`idg'pvm + round(10*365.25) if ens`idg'pvm<entrypvm
replace ens`idg'pvm10v = entrypvm if ens`idg'pvm10v<entrypvm
replace _t0 = (ens`idg'pvm10v-syntpvm)/365.25 if ens`idg'pvm10v!=.
replace _t0 = _t0 + 10 if ens`idg'pvm10v==.
drop if _t0>=_t
stdescribe
quietly: local failures = `r(N_fail)'

stcox i.`idg'_timedep 2.supu#cohort 2.ses#cohort 3.ses#cohort, strata(cohort)
test 1.`idg'_timedep = 2.`idg'_timedep

quietly: putexcel set "Pooled results.xlsx", sheet("FIGURE compare") modify
quietly: putexcel K`irow'=(`e(N_sub)'), nformat(number)
quietly: putexcel L`irow'=(`e(N_fail)'), nformat(number)
quietly: putexcel E`irow'=(`r(p)'), nformat(number_d2)
quietly: putexcel B`irow'=("`idg'")
quietly: putexcel C`irow'=("pooled")
quietly: putexcel D`irow'=("`idg_name' from year 10 onwards'")

local ++irow
local ++irow
restore
}

log close

capture log close
log using "Types of viral infection.log", replace

```

```

local dg virustype
local n_dg: word count `dg'
local dg_name `""Types of viral infection""
quietly: local irow = 34
    forvalues i=1/`n_dg' {
        preserve
        quietly: local idg : word `i' of `dg'
        quietly: local idg_name : word `i' of `dg_name'
        display ""
        display ""`idg' followed by broad dementia, adjusted for sex and education and stratified by
cohort"
        display ""
        display "Pooled IPD-analysis"
        display ""
        display "$S_TIME $S_DATE"
        display ""

        quietly: stset exitpvm, id(id) failure(ensidementia) origin(time syntpvm) enter(time entrypvm)
scale(365.25)
        quietly: keep id any`idg' *viralinf* supu cohort exitpvm ensidementia syntpvm entrypvm
ensi`idg'pvm _st_d_origin_t_t0 ses
        tab any`idg'
        stsplit `idg'_split, at(0) after(time=ensi`idg'pvm)
        tab `idg'_split
        gen `idg'_timedep =0
        replace `idg'_timedep = any`idg' if inlist(any`idg',1,2,3) & `idg'_split==0
        tab `idg'_timedep
        tab any`idg' if `idg'_split!=-1

        quietly: stdescribe
        quietly: local failures = `r(N_fail)'

        if "`idg'"=="virustype" {
            local comp "viralinf"
            replace anyviralinf = . if anyvirustype==.
        }
        tab any`comp' if `idg'_split!=-1
        tab `idg'_timedep
        recode `idg'_timedep 1=2 if any`comp'==0
        tab `idg'_timedep
        stcox i.`idg'_timedep 2.supu#cohort 2.ses#cohort 3.ses#cohort, strata(cohort)
        test 1.`idg'_timedep = 2.`idg'_timedep = 3.`idg'_timedep

        quietly: putexcel set "Pooled results.xlsx", sheet("FIGURE compare") modify
            quietly: putexcel K`irow'=(`e(N_sub)'), nformat(number)
            quietly: putexcel L`irow'=(`e(N_fail)'), nformat(number)
            quietly: putexcel E`irow'=(`r(p)'), nformat(number_d2)
            quietly: putexcel B`irow'=("comp")
            quietly: putexcel C`irow'=("pooled")
            quietly: putexcel D`irow'=("`idg_name'")

        local ++irow

        *Dementia occurring from year 10 onwards
        gen ensi`idg'pvm10v = ensi`idg'pvm + round(10*365.25) if ensi`idg'pvm<entrypvm
        replace ensi`idg'pvm10v = entrypvm if ensi`idg'pvm10v<entrypvm
        replace _t0 = (ensi`idg'pvm10v-syntpvm)/365.25 if ensi`idg'pvm10v!=.

```

```

replace _t0 = _t0 + 10 if ensi`idg'pvm10v==.
drop if _t0>=_t
stdescribe
quietly: local failures = `r(N_fail)'

stcox i.`idg'_timedep 2.supu#cohort 2.ses#cohort 3.ses#cohort, strata(cohort)
test 1.`idg'_timedep = 2.`idg'_timedep = 3.`idg'_timedep

quietly: putexcel set "Pooled results.xlsm", sheet("FIGURE compare") modify
quietly: putexcel K`irow'=(`e(N_sub)'), nformat(number)
quietly: putexcel L`irow'=(`e(N_fail)'), nformat(number)
quietly: putexcel E`irow'=(`r(p)'), nformat(number_d2)
quietly: putexcel B`irow'=("`idg'")
quietly: putexcel C`irow'=("pooled")
quietly: putexcel D`irow'=("`idg_name' from year 10 onwards")

local ++irow
local ++irow
restore
}

```

log close

\*\*\*\*\* NUMBER OF INFECTIONS \*\*\*\*\*

capture log close

log using "P for number of simultaneous infections.log", replace

local dg infcount

local n\_dg: word count `dg'

local dg\_name `""No. of infections""'

```

quietly: use "Pooled infections_trimmattu", clear
merge 1:1 id using "Infection count.dta"
tab anyinfcount
replace anyinfcount=0 if anyanyinf==0
recode anyinfcount 3=2 4=2
drop if ses==.
gen ensiinfcountpvm = ensianyinfpvm

```

quietly: local irow = 37

forvalues i=1/\`n\_dg' {

preserve

quietly: local idg : word `i' of `dg'

quietly: local idg\_name : word `i' of `dg\_name'

display ""

display "`idg' followed by broad dementia, adjusted for sex and education and stratified by

cohort"

display ""

display "Pooled IPD-analysis, normal model and 10-year exclusion"

display ""

display "\$\$\_TIME \$\$\_DATE"

display ""

quietly: stset exitpvm, id(id) failure(ensidementia) origin(time syntpvm) enter(time entrypvm)

scale(365.25)

\_d \_origin \_t \_t0 ses

```
quietly: keep id any`idg' supu cohort exitpvm ensidementia syntpvm entrypvm ensi`idg'pvm _st
```

```
tab any`idg'  
stsplit `idg'_split, at(0) after(time=ensi`idg'pvm)  
tab `idg'_split  
gen `idg'_timedep =0  
replace `idg'_timedep = any`idg' if inlist(any`idg',1,2,3) & `idg'_split==0  
tab `idg'_timedep  
tab any`idg' if `idg'_split!=-1
```

```
quietly: stdescribe  
quietly: local failures = `r(N_fail)'  
stcox i.`idg'_timedep 2.supu#cohort 2.ses#cohort 3.ses#cohort, strata(cohort)  
test 1.`idg'_timedep = 2.`idg'_timedep
```

```
quietly: putexcel set "Pooled results.xlsx", sheet("FIGURE compare") modify  
quietly: putexcel K`irow'=(`e(N_sub)'), nformat(number)  
quietly: putexcel L`irow'=(`e(N_fail)'), nformat(number)  
quietly: putexcel E`irow'=(`r(p)'), nformat(number_d2)  
quietly: putexcel B`irow'=("`idg'")  
quietly: putexcel C`irow'=("pooled")  
quietly: putexcel D`irow'=("`idg_name'")
```

```
local ++irow
```

```
*Dementia occurring from year 10 onwards  
gen ensi`idg'pvm10v = ensi`idg'pvm + round(10*365.25) if ensi`idg'pvm<entrypvm  
replace ensi`idg'pvm10v = entrypvm if ensi`idg'pvm10v<entrypvm  
replace _t0 = (ensi`idg'pvm10v-syntpvm)/365.25 if ensi`idg'pvm10v!=.  
replace _t0 = _t0 + 10 if ensi`idg'pvm10v==.  
drop if _t0>=_t
```

```
quietly: stdescribe  
quietly: local failures = `r(N_fail)'  
stcox i.`idg'_timedep 2.supu#cohort 2.ses#cohort 3.ses#cohort, strata(cohort)  
test 1.`idg'_timedep = 2.`idg'_timedep
```

```
quietly: putexcel set "Pooled results.xlsx", sheet("FIGURE compare") modify  
quietly: putexcel K`irow'=(`e(N_sub)'), nformat(number)  
quietly: putexcel L`irow'=(`e(N_fail)'), nformat(number)  
quietly: putexcel E`irow'=(`r(p)'), nformat(number_d2)  
quietly: putexcel B`irow'=("`idg'")  
quietly: putexcel C`irow'=("pooled")  
quietly: putexcel D`irow'=("`idg_name' from year 10 onwards")
```

```
local ++irow  
local ++irow  
restore  
}
```

log close

\*\*\*\*\* REPLICATION ANALYSIS (UK BIOBANK) \*\*\*\*\*

version 16

capture log close

log using "Sipila, infections and dementia, UKB replication \$S\_DATE.log", replace

/\*Generate a wide dataset (one row per participant) with the following variables:

| variable name:    | variable type             | description                                                                                                                                                                                      |
|-------------------|---------------------------|--------------------------------------------------------------------------------------------------------------------------------------------------------------------------------------------------|
| id                | integer                   | participant id                                                                                                                                                                                   |
| dementia          | binary (1/0)              | Dementia during follow-up. Please use the established definition in the cohort.                                                                                                                  |
| dementia_AD_nonAD | binary (1/2)              | Type of dementia: 1) Alzheimer's disease 2) other dementia                                                                                                                                       |
| dementiatype      | categorical (1,2,3,4,5,6) | Type of first dementia diagnosis: 1) Alzheimer's disease, 2) Frontotemporal dementia, 3) Parkinson's disease dementia, 4) Vascular dementia 5) Other specified dementia, 6) Unspecified dementia |
| exitdate          | date                      | First of the following: date of first dementia diagnosis, date of death, end of follow-up (dementia diagnoses that occur before study entry should be included if such data are available)       |
| birthday          | date                      | Date of Birth                                                                                                                                                                                    |
| entrydate         | date                      | entry                                                                                                                                                                                            |
| sex               | binary (1/2)              | Sex                                                                                                                                                                                              |
| ses               | categorical (1,2,3)       | Socioeconomic status or education (low, intermediate, high)                                                                                                                                      |
| alcohol           | categorical (0,1,2,3)     | non-drinkers, moderate drinkers, intermediate drinkers, and heavy drinkers                                                                                                                       |
| smoking           | categorical (1,2,3)       | never smokers, ex-smokers, current smokers                                                                                                                                                       |
| bmi_who           | categorical (0,25,30)     | normal ( $\leq 24.9$ kg/m <sup>2</sup> ), overweight (25.0-29.9 kg/m <sup>2</sup> ), obese ( $\geq 30.0$ kg/m <sup>2</sup> ).                                                                    |
| hypertensiondate  | date                      | date of hypertension diagnosis                                                                                                                                                                   |
| diabetesdate      | date                      | date of diabetes diagnosis                                                                                                                                                                       |

\*/

\*Store the data to Stata format

\*Please record all definitions of variables if they differ from those suggested above.

\*Trim the data

\*load data

count

drop if exitdate<=entrydate

```
count
drop if ses==.
count
```

```
tab dementia
recode dementia .=0
tab dementia
```

```
ren anycnsdate ensianycnspvm
ren noncnsdate ensianynoncns
```

```
ren anycns anyanycns
ren noncns anyanynoncns
```

```
order ensi* any*
```

```
foreach idg in anyinf bactinf viralinf hiv anycns anynoncns {
replace ensi`idg'pvm=. if ensi`idg'pvm>=exitdate
replace any`idg' = 0 if ensi`idg'pvm==.
sum ensi`idg'pvm
tab any`idg'
}
```

```
ren anyanynoncns anynoncns
ren ensianynoncns pvm ensinoncns pvm
```

\*Create variables that have identical names with those used in the primary analysis

```
capture gen diabetes_combpvm = diabetesdate
capture gen hypert_combpvm = hypertensiondate
capture gen ihd_combpvm = ihddate
capture gen cereb_combpvm = cerebdate
capture gen parkinson_combpvm = parkinsondate
capture gen tupakka = smoking
*alcocl does not change
*ses does not change
capture gen entrypvm = entrydate
capture gen exitpvm = exitdate
capture gen ensidementia = dementia
recode ensidementia 0=.
capture gen syntpvm = birthday
capture gen supu = sex
capture gen dementiatyyppi_laaja = dementiatype
capture gen byte cohort==1
```

\*save data

\*\*\* Lag periods \*\*\*

\* Random lag periods for those without an infection drawn from the distribution of the lag periods of those with an infection.

\*load data

version 16

\*Random order

```

*seed from random.org from range 1 - 1 000 000 000
set rng mt64s
set rngstream 1
set seed 421100945

```

```

gen double shuffle1 = runiform()
gen double shuffle2 = runiform()

```

```

sort shuffle1 shuffle2

```

```

*New pseudo-id-variable that preserves the random order
gen shuffle_id = _n

```

```

*Delay between study entry and time of infection
gen entry_to_inf = (ensianyinfpvm-entrypvm)/365.25
replace entry_to_inf = 0 if entry_to_inf < 0
bysort supu: sum entry_to_inf if entry_to_inf>0
sum entry_to_inf
capture drop entry_to_inf_cut
egen entry_to_inf_cut = cut(entry_to_inf), at(0 0.0009765625 2.5 5 7.5 100)
tab entry_to_inf_cut
by supu: tab entry_to_inf_cut
capture drop age
gen age = (entrypvm-syntpvm)/365.25
capture drop age_cut
egen age_cut = cut(age), at(18 50 60 100)
tab age_cut
bysort supu age_cut: tab entry_to_inf_cut

```

```

levelsof age_cut, local(age_groups)
levelsof supu, local(sexes)
levelsof entry_to_inf_cut, local(entry_lags)
local i 0

```

```

    foreach age of local age_groups {
        foreach sex of local sexes {
            local i 0
            foreach lag of local entry_lags {
                local ++i

```

```

                quietly: sum entry_to_inf if age_cut==`age' & supu==`sex' &

```

```

entry_to_inf_cut==`lag'

```

```

                if `i'==1 & `r(N)' == 0 {
                    matrix mean_lag_`age'_`sex' = 0
                }
                else if `i'==1 {
                    matrix mean_lag_`age'_`sex' = `r(mean)'
                }
                else if `r(N)' == 0 {
                    matrix mean_lag_`age'_`sex' = mean_lag_`age'_`sex' \ 0
                }
                else {
                    matrix mean_lag_`age'_`sex' = mean_lag_`age'_`sex' \ `r(mean)'
                }
            }
            matrix list mean_lag_`age'_`sex'

        }
    }

```



```
}
```

\*Return random order

```
capture drop sub_order
```

```
bysort age_cut supu anyanyinf (shuffle1 shuffle2): gen sub_order = _n
```

\*Create a similar distribution of delays between study entry and start of follow up for those without infections as with those with infection

```
capture drop entry_lag
```

```
gen entry_lag = .
```

```
levelsof age_cut, local(age_groups)
```

```
levelsof supu, local(sexes)
```

```
levelsof entry_to_inf_cut, local(entry_lags)
```

```
foreach age of local age_groups {
```

```
    foreach sex of local sexes {
```

```
        local i 0
```

```
        local cum = 0
```

```
        sum id if age_cut==`age' & supu==`sex' & anyanyinf==0
```

```
        local N_control = `r(N)'
```

```
        sum entry_to_inf_cut if age_cut==`age' & supu==`sex' & anyanyinf==1
```

```
        local N_`age'`sex' = `r(N)'
```

```
        foreach lag of local entry_lags {
```

```
            di "age_group `age', sex `sex'"
```

```
            local ++i
```

```
            di `i'
```

```
            sum entry_to_inf_cut if age_cut==`age' & supu==`sex' &
```

```
anyanyinf==1 & entry_to_inf_cut==`lag'
```

```
            local cum = `cum' + `r(N)'
```

```
            di `cum'
```

```
            di `N_`age'`sex'`
```

```
            di `N_control'`
```

```
            di mean_lag_`age'`sex'[`i',1]
```

```
            replace entry_lag = mean_lag_`age'`sex'[`i',1] if ///
```

```
            age_cut==`age' & supu==`sex' & anyanyinf==0 & entry_lag==. &
```

```
sub_order <= round((`cum' / `N_`age'`sex'`)*`N_control')
```

```
        }
```

```
        replace entry_lag = 0 if `N_`age'`sex'`==0 & entry_lag==. &
```

```
anyanyinf==0 & supu==`sex'
```

```
    }
```

```
}
```

\*For each infection variable, code it to be missing if the person has some other infection

```
local dg anyinf
```

```
foreach idg of local dg {
```

```
    tab any`idg'
```

```
    egen lag_entry_`idg' = rowmax(entrypvm ensi`idg'pvm) if any`idg'==1
```

```
    replace lag_entry_`idg' = entrypvm + round(entry_lag*365.25) if any`idg'==0
```

```
    sum lag_entry_`idg'
```

```
    }
```

```
local dg bactinf viralinf anycns noncns
```

```
foreach idg of local dg {
```

```
    tab any`idg'
```

```
    replace any`idg' = . if any`idg'!=1
```

```
    replace any`idg' = 0 if anyanyinf==0 & any`idg'!=1
```

```
    tab any`idg'
```

```

egen lag_entry_`idg' = rowmax(entrypvm ensi`idg'pvm) if any`idg'==1
replace lag_entry_`idg' = entrypvm + round(entry_lag*365.25) if any`idg'==0
sum lag_entry_`idg'
}

```

```

sum entry_lag
sum entry_to_inf
bysort supu age_cut: sum entry_lag entry_to_inf

```

```
save "UKB_lag.dta", replace
```

```
**** Analysis ****
```

```
use "UKB_lag.dta", clear
```

```
*Table 1
```

```
*Instal baselinetable package
capture net install st0524_1
```

```

preserve
stset exitdate, id(id) failure(dementia) origin(time birthday) enter(time lag_entry_anyinf) scale(365.25)
keep if _st==1 & ses!=.
keep if anyanyinf!=.
count
count if ensidementia==1

```

```

capture label define sex 1"Men" 2"Women"
label values sex sex

```

```
capture gen followup = _t-_t0
```

```

capture gen age_entry = (lag_entry_anyinf - syntpvm)/365.25
capture egen age_entry_cat = cut(age_entry), at(18,40,50,60,100)
tab age_entry_cat
sum age_entry, de
sum age_entry, de, if supu==1
sum age_entry, de, if supu==2

```

```

label define alcocl 0 "Non-drinker" 1 "Moderate" 2 "Intermediate" 3 "Heavy"
label values alcocl alcocl

```

```

foreach cm in hypert diabetes ihd cereb parkinson {
capture gen `cm'_entry= `cm'_combpvm<=lag_entry_anyinf
capture tab `cm'_entry
}

```

```
capture gen age_at_dementia = _t if _d==1
```

```

stdescribe
sum _t, de
sum _t if _d==1, de

```

```

baselinetable ///
age_entry_cat(novarlabel afterhead("Age at entry, years")) ///
age_entry(cts novarlabel afterhead("Age at entry (IQR), years")) ///
sex(novarlabel afterhead("Sex")) ///
ses(novarlabel afterhead("Education/Socioeconomic status")) ///
hypert_entry(novarlabel afterhead("hypertensionn")) ///
diabetes_entry(novarlabel afterhead("Diabetes mellitus")) ///
ihd_entry(novarlabel afterhead("Ischaemic heart disease")) ///
cereb_entry(novarlabel afterhead("Cerebrovascular disease")) ///
parkinson_entry(novarlabel afterhead("Parkinson disease")) ///
smoking(varlabel afterhead("Smoking status")) ///
alcohol(novarlabel afterhead("Alcohol drinking")) ///
bmi_who(novarlabel afterhead("Body mass index")) ///
apoe(novarlabel afterhead("apolipoprotein E genotype")) ///
followup(cts novarlabel afterhead("Follow-up, median (IQR), years")) ///
dementia(novarlabel afterhead("Dementia")) ///
age_at_dementia(cts novarlabel afterhead("Age at dementia, median (IQR), years")) ///
, ctstvar(p50 (p25-p75)) missing ///
exportexcel(SipilaUKBtable1, cell(A6) replace)

```

restore

\*FIGURE 3

```
local dg anyinf bactinf viralinf
```

```
local n_dg: word count `dg'
```

```
local dg_name ""Any infectious disease" "Bacterial infection" "Viral infection""
```

```
quietly: local irow = 7
```

```
forvalues i=1/`n_dg' {
```

```
    quietly: local idg : word `i' of `dg'
```

```
    quietly: local idg_name : word `i' of `dg_name'
```

```
    display ""
```

```
    display "`idg', adjusted for sex and education and other variables"
```

```
    display ""
```

```
    display "UKB replication analysis"
```

```
    display ""
```

```
    display "$S_TIME $S_DATE"
```

```
    display ""
```

```
/* Models
```

```
MODEL 1: adjusted for age (as the time scale), sex and ses
```

```
MODEL 2 = model 1 + those with HIV excluded
```

```
MODEL 3 = model 2 + those with missing data on alcohol, smoking, and bmi excluded
```

```
MODEL 4 = model 3 + adjusted for alcohol, smoking, bmim hypertension, diabetes
```

```
MODEL 5 = model 4 + those with data on apoe4 missing dropped
```

```
MODEL 6 = model 5 + adjusted for apoe4 genotype
```

```
*/
```

```
forvalues j=1/6 {
```

```
    preserve
```

```
    stset exitpvm, id(id) failure(ensidementia) origin(time syntpvm) enter(time lag_entry_`idg')
```

```
scale(365.25)
```

```
    tab any`idg'
```

```
    tab any`idg' _d
```

```
    sum diabetes_combpvm
```

```

replace diabetes_combpvm = . if diabetes_combpvm>=exitpvm
sum diabetes_combpvm
gen byte dm=0
replace dm = 1 if diabetes_combpvm <= lag_entry_`idg'
tab dm
sum hypert_combpvm
replace hypert_combpvm = . if hypert_combpvm>=exitpvm
sum hypert_combpvm
gen byte htn = 0
replace htn = 1 if hypert_combpvm <= lag_entry_`idg'
tab htn

```

```

if `j'==1 {
di ""
di "MODEL 1: adjusted for age (as the time scale), sex and ses"
di ""
stdescribe
quietly: local failures = `r(N_fail)'
stcox any`idg' i.supu i.ses
}
else if `j'==2 {
di ""
di "MODEL 2 = model 1 + those with HIV excluded"
di ""
drop if anyhiv==1
stdescribe
quietly: local failures = `r(N_fail)'
stcox any`idg' i.supu i.ses
}
else if `j'==3 {
di ""
di "MODEL 3 = model 2 + those with missing data on alcohol, smoking, and bmi excluded"
di ""
drop if anyhiv==1
drop if tupakka==.
drop if alcocl==.
drop if bmi_who==.
stdescribe
quietly: local failures = `r(N_fail)'
stcox any`idg' i.supu i.ses
}
else if `j'==4 {
di ""
di "MODEL 4 = model 3 + adjusted for alcohol, smoking, bmim hypertension, diabetes (please
note that this is model 3 in the published manuscript)"
di ""
drop if anyhiv==1
drop if tupakka==.
drop if alcocl==.
drop if bmi_who==.
stdescribe
quietly: local failures = `r(N_fail)'
stcox any`idg' i.supu i.ses i.tupakka i.alcocl i.bmi_who i.htn i.dm
}
else if `j'==5 {
di ""
di "MODEL 5 = model 4 + those with data on apoe4 missing dropped"

```

published manuscript"

```
di ""
drop if anyhiv==1
drop if tupakka==.
drop if alcocl==.
drop if bmi_who==.
drop if apoe==.
stdescribe
quietly: local failures = `r(N_fail)'
stcox any`idg' i.supu i.ses i.tupakka i.alcocl i.bmi_who i.htn i.dm
}
else if `j'==6 {
di ""
di "MODEL 6 = model 5 + adjusted for apoe4 genotype (please note that this is model 4 in the

di ""
drop if anyhiv==1
drop if tupakka==.
drop if alcocl==.
drop if bmi_who==.
drop if apoe==.
stdescribe
quietly: local failures = `r(N_fail)'
stcox any`idg' i.supu i.ses i.tupakka i.alcocl i.bmi_who i.htn i.dm i.apoe
}
quietly: matrix m = r(table)
tempname hr ll ul
scalar `hr' = m[1,1]
scalar `ll' = m[5,1]
scalar `ul' = m[6,1]
quietly: putexcel set "SipilaUKB_$$_DATE.xlsm", sheet("FIGURE UKB") modify
    quietly: putexcel K`irow'=(`e(N_sub)'), nformat(number)
    quietly: putexcel L`irow'=(`e(N_fail)'), nformat(number)
    quietly: putexcel E`irow'=(`hr'), nformat(number_d2)
    quietly: putexcel F`irow'=(`ll'), nformat(number_d2)
    quietly: putexcel G`irow'=(`ul'), nformat(number_d2)
    quietly: putexcel B`irow'=("`idg'")
    quietly: putexcel C`irow'=("UKB")
    quietly: putexcel D`irow'=("`idg_name' model `j'")
tab any`idg', matcell(x), if _st==1
matrix list x
quietly: tab any`idg' ensidementia, matcell(y), if _d==1
matrix list y
quietly: putexcel set "SipilaUKB_$$_DATE.xlsm", sheet("FIGURE UKB") modify
    quietly: putexcel M`irow'=(x[2,1]), nformat(number)
    quietly: putexcel N`irow'=(y[2,1]), nformat(number)

local ++irow
restore
}
local ++irow
}
```

\*\*\*\* Analysis by dementia subtypes \*\*\*\*

```
local dg anyinf bactinf viralinf
local n_dg: word count `dg'
```

```

local dg_name `""Any infectious disease" "Bacterial infection" "Viral infection""`

foreach outcome in AD VD FTD PD {
    if "`outcome'" == "AD" {
        local type=1
    }
    else if "`outcome'" == "VD" {
        local type=4
    }
    else if "`outcome'" == "FTD" {
        local type=2
    }
    else if "`outcome'" == "PD" {
        local type=3
    }
}

quietly: local irow = 7

forvalues i=1/'n_dg' {
    quietly: local idg : word `i' of `dg'
    quietly: local idg_name : word `i' of `dg_name'
    display ""
    display "`idg' , adjusted for sex and education and other variables"
    display ""
    display "UKB replication analysis"
    display ""
    display "$S_TIME $S_DATE"
    display ""

    /* Models
    MODEL 1: adjusted for age (as the time scale), sex and ses
    MODEL 2 = model 1 + those with HIV excluded
    MODEL 3 = model 2 + those with missing data on alcohol, smoking, and bmi excluded
    MODEL 4 = model 3 + adjusted for alcohol, smoking, bmim hypertension, diabetes (please note
that this is model 3 in the published manuscript)
    MODEL 5 = model 4 + those with data on apoe4 missing dropped
    MODEL 6 = model 5 + adjusted for apoe4 genotype (please note that this is model 4 in the
published manuscript)
    */

    forvalues j=1/6 {

        preserve

        stset exitpvm, id(id) failure(dementiatype==`type') origin(time syntpvm) enter(time
lag_entry_`idg') scale(365.25)

        tab any `idg'
        tab any `idg' _d
        sum diabetes_combpvm
        replace diabetes_combpvm = . if diabetes_combpvm>=exitpvm
        sum diabetes_combpvm
        gen byte dm = 0
        replace dm = 1 if diabetes_combpvm <= lag_entry_`idg'
        tab dm
        sum hypert_combpvm
        replace hypert_combpvm = . if hypert_combpvm>=exitpvm
        sum hypert_combpvm
        gen byte htn = 0

```

```

replace htn = 1 if hypert_combpvm <= lag_entry_`idg'
tab htn

```

```

if `j'==1 {
di ""
di "MODEL 1: adjusted for age (as the time scale), sex and ses"
di ""
stdescribe
quietly: local failures = `r(N_fail)'
stcox any`idg' i.supu i.ses
}
else if `j'==2 {
di ""
di "MODEL 2 = model 1 + those with HIV excluded"
di ""
drop if anyhiv==1
stdescribe
quietly: local failures = `r(N_fail)'
stcox any`idg' i.supu i.ses
}
else if `j'==3 {
di ""
di "MODEL 3 = model 2 + those with missing data on alcohol, smoking, and bmi excluded"
di ""
drop if anyhiv==1
drop if tupakka==.
drop if alcocl==.
drop if bmi_who==.
stdescribe
quietly: local failures = `r(N_fail)'
stcox any`idg' i.supu i.ses
}
else if `j'==4 {
di ""
di "MODEL 4 = model 3 + adjusted for alcohol, smoking, bmim hypertension, diabetes (please
note that this is model 3 in the published manuscript)"
di ""
drop if anyhiv==1
drop if tupakka==.
drop if alcocl==.
drop if bmi_who==.
stdescribe
quietly: local failures = `r(N_fail)'
stcox any`idg' i.supu i.ses i.tupakka i.alcocl i.bmi_who i.htn i.dm
}
else if `j'==5 {
di ""
di "MODEL 5 = model 4 + those with data on apoe4 missing dropped"
di ""
drop if anyhiv==1
drop if tupakka==.
drop if alcocl==.
drop if bmi_who==.
drop if apoe==.
stdescribe
quietly: local failures = `r(N_fail)'
stcox any`idg' i.supu i.ses i.tupakka i.alcocl i.bmi_who i.htn i.dm
}

```

published manuscript)"

```
else if `j'==6 {
di ""
di "MODEL 6 = model 5 + adjusted for apoe4 genotype (please note that this is model 4 in the
di ""
drop if anyhiv==1
drop if tupakka==.
drop if alcocl==.
drop if bmi_who==.
drop if apoe==.
stdescribe
quietly: local failures = `r(N_fail)'
stcox any`idg' i.supu i.ses i.tupakka i.alcocl i.bmi_who i.htn i.dm i.apoe
}
quietly: matrix m = r(table)
tempname hr ll ul
scalar `hr' = m[1,1]
scalar `ll' = m[5,1]
scalar `ul' = m[6,1]
quietly: putexcel set "SipilaUKB_$$_DATE.xlsm", sheet("FIGURE UKB, `outcome'") modify
quietly: putexcel K`irow'=(`e(N_sub)'), nformat(number)
quietly: putexcel L`irow'=(`e(N_fail)'), nformat(number)
quietly: putexcel E`irow'=(`hr'), nformat(number_d2)
quietly: putexcel F`irow'=(`ll'), nformat(number_d2)
quietly: putexcel G`irow'=(`ul'), nformat(number_d2)
quietly: putexcel B`irow'=("`idg'")
quietly: putexcel C`irow'="UKB"
quietly: putexcel D`irow'=("`idg_name' model `j'")
tab any`idg', matcell(x), if _st==1
matrix list x
quietly: tab any`idg' ensidementia, matcell(y), if _d==1
matrix list y
quietly: putexcel set "SipilaUKB_$$_DATE.xlsm", sheet("FIGURE UKB, `outcome'") modify
quietly: putexcel M`irow'=(x[2,1]), nformat(number)
quietly: putexcel N`irow'=(y[2,1]), nformat(number)

local ++irow
restore
}
local ++irow
}
```

log close

capture log close

log using "Sipila, UKB infection burden \$\$\_DATE.log", replace

\*Trim the data

use "UKB\_lag.dta", clear

count

drop if exitdate<=entrydate

count

drop if ses==.

count

tab dementia

recode dementia .=0



```
tab dementia
```

```
foreach idg in anyinf bactinf viralinf hiv anycns noncns {  
  replace ensi`idg'pvm=. if ensi`idg'pvm>=exitdate  
  replace any`idg' = 0 if ensi`idg'pvm==.  
  replace any`idg' = . if ensi`idg'pvm==. & anyanyinf==1  
  sum ensi`idg'pvm  
  tab any`idg'  
}
```

\*Create variables that have identical names with those used in the primary analysis

```
capture gen diabetes_combpvm = diabetesdate  
capture gen hypert_combpvm = hypertensiondate  
capture gen tupakka = smoking  
*alcocl does not change  
*ses does not change  
capture gen entrypvm = entrydate  
capture gen exitpvm = exitdate  
capture gen ensidementia = dementia  
capture recode ensidementia 0=.  
capture gen syntpvm = birthday  
capture gen supu = sex  
*dementiatype does not change
```

```
capture drop ensiinfcountpvm  
gen ensiinfcountpvm = ensianyinfpvm
```

```
save "UKB_lag.dta", replace
```

```
**** Analysis ****
```

```
***** SINGLE VS MULTIPLE INFECTIONS *****
```

```
replace toinenanyinf=0 if toinenanyinf==.  
replace kolmasanyinf=0 if kolmasanyinf==.
```

```
gen cohort=1
```

```
count  
tab toinenanyinf, mis  
tab kolmasanyinf, mis
```

```
tab anyanyinf if ensianyinfpvm<exitpvm & ensianyinfpvm < ensitoinenanyinfpvm  
tab toinenanyinf if ensitoinenanyinfpvm<exitpvm & ensitoinenanyinfpvm < ensikolmasanyinfpvm  
tab kolmasanyinf if ensikolmasanyinfpvm<exitpvm
```

```
tab anyanyinf if ensianyinfpvm<exitpvm & ensianyinfpvm < ensitoinenanyinfpvm & ensitoinenanyinfpvm>=exitpvm  
tab toinenanyinf if ensitoinenanyinfpvm<exitpvm & ensitoinenanyinfpvm < ensikolmasanyinfpvm &  
ensikolmasanyinfpvm>=exitpvm  
tab kolmasanyinf if ensikolmasanyinfpvm<exitpvm
```

```
tab ensidementia if ensianyinfpvm<exitpvm & ensitoinenanyinfpvm>=exitpvm  
tab ensidementia if ensitoinenanyinfpvm<exitpvm & ensikolmasanyinfpvm>=exitpvm  
tab ensidementia if ensikolmasanyinfpvm<exitpvm
```

```

sum ensianyinfpvm
replace ensianyinfpvm = . if ensianyinfpvm>=exitpvm
sum ensianyinfpvm

sum ensitoinenanyinfpvm
replace ensitoinenanyinfpvm = . if ensitoinenanyinfpvm>=exitpvm
sum ensitoinenanyinfpvm

sum ensikolmasanyinfpvm
replace ensikolmasanyinfpvm = . if ensikolmasanyinfpvm>=exitpvm
sum ensikolmasanyinfpvm

replace toinenanyinf = . if ensitoinenanyinfpvm==.
replace kolmasanyinf = . if ensikolmasanyinfpvm==.

local dg_name `"'Multiple infections'"`
local irow 16
local prow = `irow'

                                preserve

                                egen lag_entry_multiinf = rowmax(lag_entry_anyinf ensitoinenanyinfpvm ensikolmasanyinfpvm)
                                egen multiinfpvm = rowmax(ensianyinfpvm ensitoinenanyinfpvm ensikolmasanyinfpvm)

                                stset exitpvm, id(id) failure(ensidementia) origin(time syntpvm) enter(time lag_entry_multiinf)

scale(365.25)

                                gen byte multiinf = 0
                                tab multiinf
                                replace multiinf = 1 if anyanyinf==1
                                tab multiinf
                                replace multiinf = 2 if ensitoinenanyinfpvm!=.
                                replace multiinf = 3 if ensikolmasanyinfpvm!=.
                                tab multiinf

                                stdescribe
                                tempname hr1 ll1 ul1 hr2 ll2 ul2 hr3 ll3 ul3 N1 N2 N3 fail1 fail2 fail3
                                forvalues i =1/3 {
                                stcox i.multiinf 2.supu#cohort 2.ses#cohort 3.ses#cohort, strata(cohort), if inlist(multiinf,0,`i')
                                quietly: matrix m = r(table)
                                matrix list m
                                scalar `N`i" = e(N_sub)
                                scalar `fail`i" = e(N_fail)
                                scalar `hr`i" = m[1,2]
                                scalar `ll`i" = m[5,2]
                                scalar `ul`i" = m[6,2]
                                }

                                forvalues i =1/3 {
                                quietly: putexcel set "SipilaUKB_$$_DATE.xlsm", sheet("FIGURE sensitivity dist") modify
                                quietly: putexcel K`irow'=(`N`i"), nformat(number)
                                quietly: putexcel L`irow'=(`fail`i"), nformat(number)
                                quietly: putexcel E`irow'=(`hr`i"), nformat(number_d2)
                                quietly: putexcel F`irow'=(`ll`i"), nformat(number_d2)
                                quietly: putexcel G`irow'=(`ul`i"), nformat(number_d2)
                                quietly: putexcel B`irow'=("Multiinf")
                                quietly: putexcel C`irow'=("UKB")
                                quietly: putexcel D`irow'=("Single vs multiple infections, infection No. `i'")

```

```

tab multiinf, matcell(x), if inlist(multiinf,0,'i') & _st==1
matrix list x
tab multiinf ensidementia, matcell(y), if inlist(multiinf,0,'i') & _d==1
matrix list y
quietly: putexcel set "SipilaUKB_$$_DATE.xlsm", sheet("FIGURE sensitivity dist") modify
               quietly: putexcel M`irow'=(x[2,1]), nformat(number)
               quietly: putexcel N`irow'=(y[2,1]), nformat(number)

local ++irow
local ++irow
}

*P for trend
stcox multiinf i.supu i.ses
quietly: matrix n = r(table)
matrix list n
tempname p
scalar `p' = n[4,1]
quietly: putexcel set "SipilaUKB_$$_DATE.xlsm", sheet("FIGURE sensitivity dist") modify
               quietly: putexcel O`prow'=(`p'), nformat(number_d4)

restore

```

\*\*\*\*\* One or several different pathogens \*\*\*\*\*

```

local dg_name `""Multiple organisms""'
local idg_name `""Multiple_organisms""'
local irow 37
local prow = `irow'

preserve
drop if ses==.
egen ensibactviralpvm = rowmin(ensibactinfpvm ensiviralinfpvm)
gen toinenbactviralpvm = ensibactviralpvm if ensibactinfpvm==ensiviralinfpvm &
ensibactinfpvm!=.
replace toinenbactviralpvm = ensibactinfpvm if ensibactinfpvm>ensiviralinfpvm &
ensibactinfpvm!=.
replace toinenbactviralpvm = ensiviralinfpvm if ensiviralinfpvm>ensibactinfpvm &
ensiviralinfpvm!=.

gen anybactviral = 1 if ensibactviralpvm!=.
gen toinenbactviral = 1 if toinenbactviralpvm!=.
egen lag_entry_bactviral = rowmax(lag_entry_anyinf ensibactviralpvm toinenbactviralpvm)

stset exitpvm, id(id) failure(ensidementia) origin(time syntpvm) enter(time lag_entry_bactviral)
scale(365.25)
quietly: keep id anybactviral supu cohort exitpvm ensidementia syntpvm entrypvm ensi*pvm
*tainen* _st_d_origin_t_t0 ses anyanyinf
sum ensibactviralpvm toinenbactviralpvm
tab anybactviral if _st==1
tab toinenbactviral if _st==1

gen byte multiinf = 0 if anyanyinf==0
tab multiinf
tab multiinf if _st==1
replace multiinf = 1 if anybactviral==1
tab multiinf
tab multiinf if _st==1

```

```

replace multiinf = 2 if toinenbactviral==1
tab multiinf
tab multiinf if _st==1

quietly: stdescribe
stcox i.multiinf 2.supu#cohort 2.ses#cohort 3.ses#cohort, strata(cohort), if multiinf!=2
quietly: matrix m = r(table)
matrix list m
tempname hr1 ll1 ul1 hr2 ll2 ul2 N1 fail1 N2 fail2
scalar `hr1' = m[1,2]
scalar `ll1' = m[5,2]
scalar `ul1' = m[6,2]
scalar `N1' = e(N_sub)
scalar `fail1' = e(N_fail)
stcox i.multiinf 2.supu#cohort 2.ses#cohort 3.ses#cohort, strata(cohort), if multiinf!=1
quietly: matrix m = r(table)
matrix list m
scalar `hr2' = m[1,2]
scalar `ll2' = m[5,2]
scalar `ul2' = m[6,2]
scalar `N2' = e(N_sub)
scalar `fail2' = e(N_fail)

forvalues i =1/2 {
quietly: putexcel set "SipilaUKB_$$_DATE.xlsm", sheet("FIGURE sensitivity dist") modify
quietly: putexcel K`irow'=(`N`i'), nformat(number)
quietly: putexcel L`irow'=(`fail`i'), nformat(number)
quietly: putexcel E`irow'=(`hr`i'), nformat(number_d2)
quietly: putexcel F`irow'=(`ll`i'), nformat(number_d2)
quietly: putexcel G`irow'=(`ul`i'), nformat(number_d2)
quietly: putexcel B`irow'=("`idg_name'")
quietly: putexcel C`irow'="UKB"
quietly: putexcel D`irow'=("Different micro-organisms, infection No. `i'")
tab multiinf, matcell(x), if _st==1 & inlist(multiinf,0,`i')
matrix list x
tab multiinf ensidementia, matcell(y), if _d==1 & inlist(multiinf,0,`i')
matrix list y
quietly: putexcel set "SipilaUKB_$$_DATE.xlsm", sheet("FIGURE sensitivity dist") modify
quietly: putexcel M`irow'=(x[2,1]), nformat(number)
quietly: putexcel N`irow'=(y[2,1]), nformat(number)

local ++irow
local ++irow
}
*P for trend
stcox multiinf 2.supu#cohort 2.ses#cohort 3.ses#cohort, strata(cohort)
quietly: matrix n = r(table)
matrix list n
tempname p
scalar `p' = n[4,1]
quietly: putexcel set "SipilaUKB_$$_DATE.xlsm", sheet("FIGURE sensitivity dist") modify
quietly: putexcel O`prow'=(`p'), nformat(number_d4)

restore

```

\*\*\*\*\* NUMBER OF SIMULTANEOUS INFECTIONS \*\*\*\*\*

```

count
tab anyinfcnt, mis

```

```

tab anyinfcnt ensidementia, mis
replace anyinfcnt = . if anyanyinf!=0 & ensianyinfpvm>=exitpvm
replace anyinfcnt = 0 if anyanyinf==0
replace anyinfcnt = 2 if anyinfcnt > 2 & anyinfcnt < .
tab anyinfcnt, mis
tab anyinfcnt ensidementia, mis

local dg infcount
local n_dg: word count `dg'
local dg_name `"'No. of simultaneous infections'"

quietly: local irow = 23
local prow = `irow'
    forvalues i=1/`n_dg' {
        preserve
        quietly: local idg : word `i' of `dg'
        quietly: local idg_name : word `i' of `dg_name'
        display ""
        display "`idg' followed by broad dementia, adjusted for sex and education"
        display ""
        display "Pooled IPD-analysis, normal model"
        display ""
        display "$S_TIME $S_DATE"
        display ""

        stset exitpvm, id(id) failure(ensidementia) origin(time syntpvm) enter(time lag_entry_anyinf)

scale(365.25)

tab any`idg'
tab any`idg'_d

quietly: stdescribe
quietly: local failures = `r(N_fail)'
stcox i.any`idg' 2.supu#cohort 2.ses#cohort 3.ses#cohort, strata(cohort), if any`idg'!=2
quietly: matrix m = r(table)
matrix list m
tempname hr1 ll1 ul1 hr2 ll2 ul2 N1 fail1 N2 fail2
scalar `hr1' = m[1,2]
scalar `ll1' = m[5,2]
scalar `ul1' = m[6,2]
scalar `N1' = e(N_sub)
scalar `fail1' = e(N_fail)
stcox i.any`idg' 2.supu#cohort 2.ses#cohort 3.ses#cohort, strata(cohort), if any`idg'!=1
quietly: matrix m = r(table)
matrix list m
scalar `hr2' = m[1,2]
scalar `ll2' = m[5,2]
scalar `ul2' = m[6,2]
scalar `N2' = e(N_sub)
scalar `fail2' = e(N_fail)

forvalues i =1/2 {
quietly: putexcel set "SipilaUKB_$$_DATE.xlsm", sheet("FIGURE sensitivity dist") modify
    quietly: putexcel K`irow'=(`N`i'), nformat(number)
    quietly: putexcel L`irow'=(`fail`i'), nformat(number)
    quietly: putexcel E`irow'=(`hr`i'), nformat(number_d2)
    quietly: putexcel F`irow'=(`ll`i'), nformat(number_d2)
    quietly: putexcel G`irow'=(`ul`i'), nformat(number_d2)

```

```

quietly: putexcel B`irow'=("Simultaneous infection diagnoses")
quietly: putexcel C`irow'=("UKB")
quietly: putexcel D`irow'=("No. of simultaneous infection diagnoses = `i'")
tab any`idg', matcell(x), if _st==1
matrix list x
tab any`idg' ensidementia, matcell(y), if _d==1
matrix list y
quietly: putexcel set "SipilaUKB_$$_DATE.xlsm", sheet("FIGURE sensitivity dist") modify
local j = `i' + 1
quietly: putexcel M`irow'=(x[`j',1]), nformat(number)
quietly: putexcel N`irow'=(y[`j',1]), nformat(number)

local ++irow
local ++irow
}

*P for trend
stcox any`idg' i.supu i.ses
quietly: matrix n = r(table)
matrix list n
tempname p
scalar `p' = n[4,1]
quietly: putexcel set "SipilaUKB_$$_DATE.xlsm", sheet("FIGURE sensitivity dist") modify
quietly: putexcel O`prow'=(`p'), nformat(number_d4)

restore
}

```

\*FIGURE sensitivity, CNS vs other infections

```

count
tab anyanycns
tab anynoncns
replace anyanycns=0 if ensianycnspvm>=exitpvm
replace anynoncns=0 if ensinoncnspvm>=exitpvm
replace ensianycnspvm=. if ensianycnspvm>=exitpvm
replace ensinoncnspvm=. if ensinoncnspvm>=exitpvm

replace anyanycns = . if anyanycns==0 & anyanyinf==1
tab anyanycns

replace anynoncns = . if anynoncns==0 & anyanyinf==1
tab anynoncns

tab anyanycns
tab anynoncns
tab anyanycns ensidementia
tab anynoncns ensidementia

```

```

local dg anycns noncns
local n_dg: word count `dg'
local dg_name ""Any CNS infection" "Any extra-CNS infection""
quietly: local irow = 28
forvalues i=1/'n_dg' {
preserve
quietly: local idg : word `i' of `dg'
quietly: local idg_name : word `i' of `dg_name'
display ""
display "`idg' followed by broad dementia, adjusted for sex and education"

```

```

display ""
display "UKB replication analysis"
display ""
display "$S_TIME $S_DATE"
display ""

scale(365.25)

stset exitpvm, id(id) failure(ensidementia) origin(time syntpvm) enter(time lag_entry_`idg')

tab any`idg'
tab any`idg' _d

stdescribe
quietly: local failures = `r(N_fail)'
stcox any`idg' i.supu i.ses
quietly: matrix m = r(table)
matrix list m
tempname hr ll ul
scalar `hr' = m[1,1]
scalar `ll' = m[5,1]
scalar `ul' = m[6,1]
quietly: putexcel set "SipilaUKB_`$S_DATE'.xslm", sheet("FIGURE sensitivity dist") modify
    quietly: putexcel K`irow'=(`e(N_sub)'), nformat(number)
    quietly: putexcel L`irow'=(`e(N_fail)'), nformat(number)
    quietly: putexcel E`irow'=(`hr'), nformat(number_d2)
    quietly: putexcel F`irow'=(`ll'), nformat(number_d2)
    quietly: putexcel G`irow'=(`ul'), nformat(number_d2)
    quietly: putexcel B`irow'=("`idg'")
    quietly: putexcel C`irow'=("UKB")
    quietly: putexcel D`irow'=("`idg_name'")
tab any`idg', matcell(x), if _st==1
matrix list x
tab any`idg' ensidementia, matcell(y), if _d==1
matrix list y
quietly: putexcel set "SipilaUKB_`$S_DATE'.xslm", sheet("FIGURE sensitivity dist") modify
    quietly: putexcel M`irow'=(x[2,1]), nformat(number)
    quietly: putexcel N`irow'=(y[2,1]), nformat(number)

local ++irow
local ++irow
restore
}

```

\*Difference between CNS infections and extra-CNS infections

```

*CNS infection vs non cns infection
capture drop anycnsnotcns
capture drop lag_entry_cnsnotcns
capture gen byte anycnsnotcns = 1 if ensianycnspvm<=ensinoncnspvm & anyanycns==1 &
ensianycnspvm<exitpvm
    replace anycnsnotcns = 0 if ensinoncnspvm<ensianycnspvm & anycnsnotcns!=1 & anynoncns==1 &
ensinoncnspvm<exitpvm
capture egen ensicnsnotcnspvm = rowmin(ensianycnspvm ensinoncnspvm)
replace ensicnsnotcnspvm = . if ensicnsnotcnspvm >= exitpvm
replace ensicnsnotcnspvm = . if anycnsnotcns!=1 & anycnsnotcns!=0
gen lag_entry_cnsnotcns = lag_entry_`anyinf' if anyanyinf==0
replace lag_entry_cnsnotcns = ensicnsnotcnspvm if ensicnsnotcnspvm!=. & (anycnsnotcns==1 |
anycnsnotcns==0)
count
sum ensicnsnotcnspvm

```

```

tab anycnsnotcns
tab anyanycns
tab anynoncns
tab anycnsnotcns ensidementia
tab anyanycns ensidementia
tab anynoncns ensidementia

```

```
local dg cnsnotcns
```

```
local n_dg: word count `dg'
```

```
local dg_name `"'CNS vs extra-CNS infection'"'
```

```
quietly: local irow = 34
```

```

forvalues i=1/`n_dg' {
    preserve
    quietly: local idg : word `i' of `dg'
    quietly: local idg_name : word `i' of `dg_name'
    display ""
    display "`idg' followed by broad dementia, adjusted for sex and education"
    display ""
    display "Pooled IPD-analysis"
    display ""
    display "$$_TIME $$_DATE"
    display ""

```

```
scale(365.25)
```

```
stset exitpvm, id(id) failure(ensidementia) origin(time syntpvm) enter(time lag_entry_`idg')
```

```
keep if _st==1
```

```
gen byte anyeither = 1 if ensi`idg'pvm < exitpvm
```

```
replace anyeither = 0 if anyanyinf==0
```

```
tab any`idg'
```

```
tab any`idg'_d
```

```
tab anyeither
```

```
tab anyeither _d
```

```
stdescribe
```

```
gen `idg'_compare = 0 if anyanyinf==0
```

```
replace `idg'_compare = 1 if any`idg'==1
```

```
replace `idg'_compare = 2 if any`idg'==0
```

```
tab `idg'_compare
```

```
tab `idg'_compare_d
```

```
stcox i.`idg'_compare supu ses
```

```
test 1.`idg'_compare = 2.`idg'_compare
```

```
quietly: putexcel set "SipilaUKB_$$_DATE.xlsm", sheet("FIGURE sensitivity dist") modify
```

```
quietly: putexcel K`irow'=(`e(N_sub)'), nformat(number)
```

```
quietly: putexcel L`irow'=(`e(N_fail)'), nformat(number)
```

```
quietly: putexcel E`irow'=(`r(p)'), nformat(number_d2)
```

```
quietly: putexcel B`irow'=("`idg'")
```

```
quietly: putexcel C`irow'=("UKB")
```

```
quietly: putexcel D`irow'=("`idg_name'")
```

```
local ++irow
```

```
local ++irow
```

```
restore
```

```
}
```



\*\*\*\* Analysis ALZHEIMER'S DISEASE \*\*\*\*

\*\*\*\* SINGLE VS MULTIPLE INFECTIONS \*\*\*\*

local dg\_name ""Multiple infections""

local irow 16

local prow = `irow'

preserve

egen lag\_entry\_multiinf = rowmax(lag\_entry\_anyinf ensitoinenanyinfpvm ensikolmasanyinfpvm)

egen multiinfpvm = rowmax(ensianyinfpvm ensitoinenanyinfpvm ensikolmasanyinfpvm)

stset exitpvm, id(id) failure(dementiatype = 1) origin(time syntpvm) enter(time

lag\_entry\_multiinf) scale(365.25)

gen byte multiinf = 0

tab multiinf

replace multiinf = 1 if anyanyinf==1

tab multiinf

replace multiinf = 2 if ensitoinenanyinfpvm!=.

replace multiinf = 3 if ensikolmasanyinfpvm!=.

tab multiinf

stdescribe

tempname hr1 ll1 ul1 hr2 ll2 ul2 hr3 ll3 ul3 N1 N2 N3 fail1 fail2 fail3

forvalues i =1/3 {

stcox i.multiinf 2.supu#cohort 2.ses#cohort 3.ses#cohort, strata(cohort), if inlist(multiinf,0,`i')

quietly: matrix m = r(table)

matrix list m

scalar `N`i" = e(N\_sub)

scalar `fail`i" = e(N\_fail)

scalar `hr`i" = m[1,2]

scalar `ll`i" = m[5,2]

scalar `ul`i" = m[6,2]

}

forvalues i =1/3 {

quietly: putexcel set "SipilaUKB\_\$\$\_DATE.xlsm", sheet("FIGURE sens dist AD") modify

quietly: putexcel K`irow'=(`N`i"), nformat(number)

quietly: putexcel L`irow'=(`fail`i"), nformat(number)

quietly: putexcel E`irow'=(`hr`i"), nformat(number\_d2)

quietly: putexcel F`irow'=(`ll`i"), nformat(number\_d2)

quietly: putexcel G`irow'=(`ul`i"), nformat(number\_d2)

quietly: putexcel B`irow'=("Multiinf")

quietly: putexcel C`irow'=("UKB")

quietly: putexcel D`irow'=("Single vs multiple infections, infection No. `i'")

tab multiinf, matcell(x), if inlist(multiinf,0,`i') & \_st==1

matrix list x

tab multiinf ensidementia, matcell(y), if inlist(multiinf,0,`i') & \_d==1

matrix list y

quietly: putexcel set "SipilaUKB\_\$\$\_DATE.xlsm", sheet("FIGURE sens dist AD") modify

quietly: putexcel M`irow'=(x[2,1]), nformat(number)

quietly: putexcel N`irow'=(y[2,1]), nformat(number)

local ++irow

```

local ++irow
}

*P for trend
stcox multiinf i.supu i.ses
quietly: matrix n = r(table)
matrix list n
tempname p
scalar `p' = n[4,1]
quietly: putexcel set "SipilaUKB_$$_DATE.xlsm", sheet("FIGURE sens dist AD") modify
quietly: putexcel O`prow'=(`p'), nformat(number_d4)

restore

```

\*\*\*\*\* One or several different pathogens \*\*\*\*\*

```

local dg_name `"'Multiple organisms'"
local idg_name `"'Multiple_organisms'"
local irow 37
local prow = `irow'

preserve
drop if ses==.
egen ensibactviralpvm = rowmin(ensibactinfpvm ensiviralinfpvm)
gen toinenbactviralpvm = ensibactviralpvm if ensibactinfpvm==ensiviralinfpvm &
ensibactinfpvm!=.
replace toinenbactviralpvm = ensibactinfpvm if ensibactinfpvm>ensiviralinfpvm &
ensibactinfpvm!=.
replace toinenbactviralpvm = ensiviralinfpvm if ensiviralinfpvm>ensibactinfpvm &
ensiviralinfpvm!=.
gen anybactviral = 1 if ensibactviralpvm!=.
gen toinenbactviral = 1 if toinenbactviralpvm!=.
egen lag_entry_bactviral = rowmax(lag_entry_anyinf ensibactviralpvm toinenbactviralpvm)

stset exitpvm, id(id) failure(dementiatype = 1) origin(time syntpvm) enter(time
lag_entry_bactviral) scale(365.25)
quietly: keep id anybactviral supu cohort exitpvm ensidementia syntpvm entrypvm ensi*pvm
*tainen* _st_d_origin_t_t0 ses anyanyinf
sum ensibactviralpvm toinenbactviralpvm
tab anybactviral if _st==1
tab toinenbactviral if _st==1

gen byte multiinf = 0 if anyanyinf==0
tab multiinf
tab multiinf if _st==1
replace multiinf = 1 if anybactviral==1
tab multiinf
tab multiinf if _st==1
replace multiinf = 2 if toinenbactviral==1
tab multiinf
tab multiinf if _st==1

quietly: stdescribe
stcox i.multiinf 2.supu#cohort 2.ses#cohort 3.ses#cohort, strata(cohort), if multiinf!=2
quietly: matrix m = r(table)
matrix list m

```

```

tempname hr1 ll1 ul1 hr2 ll2 ul2 N1 fail1 N2 fail2
scalar `hr1' = m[1,2]
scalar `ll1' = m[5,2]
scalar `ul1' = m[6,2]
scalar `N1' = e(N_sub)
scalar `fail1' = e(N_fail)
stcox i.multiinf 2.supu#cohort 2.ses#cohort 3.ses#cohort, strata(cohort), if multiinf!=1
quietly: matrix m = r(table)
matrix list m
scalar `hr2' = m[1,2]
scalar `ll2' = m[5,2]
scalar `ul2' = m[6,2]
scalar `N2' = e(N_sub)
scalar `fail2' = e(N_fail)

forvalues i = 1/2 {
quietly: putexcel set "SipilaUKB_$$_DATE.xlsm", sheet("FIGURE sens dist AD") modify
    quietly: putexcel K`irow'=(`N`i'), nformat(number)
    quietly: putexcel L`irow'=(`fail`i'), nformat(number)
    quietly: putexcel E`irow'=(`hr`i'), nformat(number_d2)
    quietly: putexcel F`irow'=(`ll`i'), nformat(number_d2)
    quietly: putexcel G`irow'=(`ul`i'), nformat(number_d2)
    quietly: putexcel B`irow'=("`idg_name`")
    quietly: putexcel C`irow'="UKB"
    quietly: putexcel D`irow'=("Different micro-organisms, infection No. `i'")
tab multiinf, matcell(x), if _st==1 & inlist(multiinf,0,`i')
matrix list x
tab multiinf ensidementia, matcell(y), if _d==1 & inlist(multiinf,0,`i')
matrix list y
quietly: putexcel set "SipilaUKB_$$_DATE.xlsm", sheet("FIGURE sens dist AD") modify
    quietly: putexcel M`irow'=(x[2,1]), nformat(number)
    quietly: putexcel N`irow'=(y[2,1]), nformat(number)

local ++irow
local ++irow
}
*P for trend
stcox multiinf 2.supu#cohort 2.ses#cohort 3.ses#cohort, strata(cohort)
quietly: matrix n = r(table)
matrix list n
tempname p
scalar `p' = n[4,1]
quietly: putexcel set "SipilaUKB_$$_DATE.xlsm", sheet("FIGURE sens dist AD") modify
    quietly: putexcel O`prow'=(`p'), nformat(number_d4)

restore

```

\*\*\*\*\* NUMBER OF SIMULTANEOUS INFECTIONS \*\*\*\*\*

```

local dg infcount
local n_dg: word count `dg'
local dg_name ""No. of simultaneous infections""

```

```

quietly: local irow = 23
local prow = `irow'
    forvalues i=1/`n_dg' {
        preserve
        quietly: local idg : word `i' of `dg'
        quietly: local idg_name : word `i' of `dg_name'
    }

```

```

display ""
display ""`idg' followed by broad dementia, adjusted for sex and education"
display ""
display "Pooled IPD-analysis, normal model"
display ""
display "$S_TIME $S_DATE"
display ""

stset exitpvm, id(id) failure(dementiatype = 1) origin(time syntpvm) enter(time
lag_entry_anyinf) scale(365.25)

tab any`idg'
tab any`idg' _d

quietly: stdescribe
quietly: local failures = `r(N_fail)'
stcox i.any`idg' 2.supu#cohort 2.ses#cohort 3.ses#cohort, strata(cohort), if any`idg'!=2
quietly: matrix m = r(table)
matrix list m
tempname hr1 ll1 ul1 hr2 ll2 ul2 N1 fail1 N2 fail2
scalar `hr1' = m[1,2]
scalar `ll1' = m[5,2]
scalar `ul1' = m[6,2]
scalar `N1' = e(N_sub)
scalar `fail1' = e(N_fail)
stcox i.any`idg' 2.supu#cohort 2.ses#cohort 3.ses#cohort, strata(cohort), if any`idg'!=1
quietly: matrix m = r(table)
matrix list m
scalar `hr2' = m[1,2]
scalar `ll2' = m[5,2]
scalar `ul2' = m[6,2]
scalar `N2' = e(N_sub)
scalar `fail2' = e(N_fail)

forvalues i =1/2 {
quietly: putexcel set "SipilaUKB_$$_DATE.xlsm", sheet("FIGURE sens dist AD") modify
quietly: putexcel K`irow'=(`N`i'), nformat(number)
quietly: putexcel L`irow'=(`fail`i'), nformat(number)
quietly: putexcel E`irow'=(`hr`i'), nformat(number_d2)
quietly: putexcel F`irow'=(`ll`i'), nformat(number_d2)
quietly: putexcel G`irow'=(`ul`i'), nformat(number_d2)
quietly: putexcel B`irow'=("Simultaneous infection diagnoses")
quietly: putexcel C`irow'=("UKB")
quietly: putexcel D`irow'=("No. of simultaneous infection diagnoses = `i'")
tab any`idg', matcell(x), if _st==1
matrix list x
tab any`idg' ensidementia, matcell(y), if _d==1
matrix list y
quietly: putexcel set "SipilaUKB_$$_DATE.xlsm", sheet("FIGURE sens dist AD") modify
local j = `i' + 1
quietly: putexcel M`irow'=(x[`j',1]), nformat(number)
quietly: putexcel N`irow'=(y[`j',1]), nformat(number)

local ++irow
local ++irow
}

*P for trend
stcox any`idg' i.supu i.ses

```

```

quietly: matrix n = r(table)
matrix list n
tempname p
scalar `p' = n[4,1]
quietly: putexcel set "SipilaUKB_$$_DATE.xlsm", sheet("FIGURE sens dist AD") modify
               quietly: putexcel O`prow'=(`p'), nformat(number_d4)
restore
}

```

\*FIGURE sensitivity, CNS vs other infections

```

tab anyanycns
tab anynoncns
tab anyanycns dementiatype
tab anynoncns dementiatype

```

```

local dg anycns noncns
local n_dg: word count `dg'
local dg_name "" "Any CNS infection" "Any extra-CNS infection""
quietly: local irow = 28
           forvalues i=1/`n_dg' {
               preserve
               quietly: local idg : word `i' of `dg'
               quietly: local idg_name : word `i' of `dg_name'
               display ""
               display "`idg' followed by broad dementia, adjusted for sex and education"
               display ""
               display "UKB replication analysis, normal model and 5-year exclusion"
               display ""
               display "$$ _TIME $$ _DATE"
               display ""

               stset exitpvm, id(id) failure(dementiatype = 1) origin(time syntpvm) enter(time lag_entry_`idg')

scale(365.25)

tab any`idg'
tab any`idg' _d

stdescribe
quietly: local failures = `r(N_fail)'
stcox any`idg' i.supu i.ses
quietly: matrix m = r(table)
matrix list m
tempname hr ll ul
scalar `hr' = m[1,1]
scalar `ll' = m[5,1]
scalar `ul' = m[6,1]
quietly: putexcel set "SipilaUKB_$$_DATE.xlsm", sheet("FIGURE sens dist AD") modify
               quietly: putexcel K`irow'=(`e(N_sub)'), nformat(number)
               quietly: putexcel L`irow'=(`e(N_fail)'), nformat(number)
               quietly: putexcel E`irow'=(`hr'), nformat(number_d2)
               quietly: putexcel F`irow'=(`ll'), nformat(number_d2)
               quietly: putexcel G`irow'=(`ul'), nformat(number_d2)
               quietly: putexcel B`irow'=("`idg'")
               quietly: putexcel C`irow'=("UKB")
               quietly: putexcel D`irow'=("`idg_name'")
tab any`idg', matcell(x), if _st==1

```

```

matrix list x
tab any`idg` ensidementia, matcell(y), if _d==1
matrix list y
quietly: putexcel set "SipilaUKB_$$_DATE.xlsm", sheet("FIGURE sens dist AD") modify
               quietly: putexcel M`irow'=(x[2,1]), nformat(number)
               quietly: putexcel N`irow'=(y[2,1]), nformat(number)

local ++irow
local ++irow
restore
}

```

\*Difference between CNS infections and extra-CNS infections

\*CNS infection vs non cns infection

```

tab anycnsnotcns
tab anyanycns
tab anynoncns
tab anycnsnotcns dementiatype
tab anyanycns dementiatype
tab anynoncns dementiatype

```

```

local dg cnsnotcns
local n_dg: word count `dg'
local dg_name ""CNS vs extra-CNS infection""
quietly: local irow = 34
        forvalues i=1/`n_dg' {
            preserve
            quietly: local idg : word `i' of `dg'
            quietly: local idg_name : word `i' of `dg_name'
            display ""
            display "`idg' followed by broad dementia, adjusted for sex and education"
            display ""
            display "Pooled IPD-analysis"
            display ""
            display "$S_TIME  $$_DATE"
            display ""

            stset exitpvm, id(id) failure(dementiatype = 1) origin(time syntpvm) enter(time
lag_entry_anyinf) scale(365.25)

```

```

gen byte anyeither = 1 if ensi`idg'pvm < exitpvm
replace anyeither = 0 if anyanyinf==0
tab any`idg'
tab any`idg' _d
tab anyeither
tab anyeither _d

```

stdescribe

```

gen `idg'_compare = 0 if anyanyinf==0
replace `idg'_compare = 1 if any`idg'==1
replace `idg'_compare = 2 if any`idg'==0
tab `idg'_compare
tab `idg'_compare _d
stcox i.`idg'_compare supu ses
test 1.`idg'_compare = 2.`idg'_compare

```

```

quietly: putexcel set "SipilaUKB_$$_DATE.xlsm", sheet("FIGURE sens dist AD") modify
quietly: putexcel K`irow'=(`e(N_sub)'), nformat(number)
quietly: putexcel L`irow'=(`e(N_fail)'), nformat(number)
quietly: putexcel E`irow'=(`r(p)'), nformat(number_d2)
quietly: putexcel B`irow'=("`idg`")
quietly: putexcel C`irow'=("UKB")
quietly: putexcel D`irow'=("`idg_name`")

local ++irow

local ++irow
restore
}

```

\*\*\*\* Analysis VASCULAR DEMENTIA \*\*\*\*

\*\*\*\*\* SINGLE VS MULTIPLE INFECTIONS \*\*\*\*\*

```
local dg_name `""Multiple infections""`
```

```
local irow 16
```

```
local prow = `irow`
```

```
preserve
```

```
egen lag_entry_multiinf = rowmax(lag_entry_anyinf ensitoinenanyinfpvm ensikolmasanyinfpvm)
```

```
egen multiinfpvm = rowmax(ensianyinfpvm ensitoinenanyinfpvm ensikolmasanyinfpvm)
```

```
stset exitpvm, id(id) failure(dementiatype = 4) origin(time syntpvm) enter(time
```

```
lag_entry_multiinf) scale(365.25)
```

```
gen byte multiinf = 0
```

```
tab multiinf
```

```
replace multiinf = 1 if anyanyinf==1
```

```
tab multiinf
```

```
replace multiinf = 2 if ensitoinenanyinfpvm!=.
```

```
replace multiinf = 3 if ensikolmasanyinfpvm!=.
```

```
tab multiinf
```

```
stdescribe
```

```
tempname hr1 ll1 ul1 hr2 ll2 ul2 hr3 ll3 ul3 N1 N2 N3 fail1 fail2 fail3
```

```
forvalues i =1/3 {
```

```
stcox i.multiinf 2.supu#cohort 2.ses#cohort 3.ses#cohort, strata(cohort), if inlist(multiinf,0,i)
```

```
quietly: matrix m = r(table)
```

```
matrix list m
```

```
scalar `N`i` = e(N_sub)
```

```
scalar `fail`i` = e(N_fail)
```

```
scalar `hr`i` = m[1,2]
```

```
scalar `ll`i` = m[5,2]
```

```
scalar `ul`i` = m[6,2]
```

```
}
```

```
forvalues i =1/3 {
```

```
quietly: putexcel set "SipilaUKB_$$_DATE.xlsm", sheet("FIGURE sens dist VaD") modify
```

```
quietly: putexcel K`irow'=(`N`i`), nformat(number)
```

```
quietly: putexcel L`irow'=(`fail`i`), nformat(number)
```

```
quietly: putexcel E`irow'=(`hr`i`), nformat(number_d2)
```

```

quietly: putexcel F`irow'=(`ll`i"), nformat(number_d2)
quietly: putexcel G`irow'=(`ul`i"), nformat(number_d2)
quietly: putexcel B`irow'=("Multiinf")
quietly: putexcel C`irow'=("UKB")
quietly: putexcel D`irow'=("Single vs multiple infections, infection No. `i")
tab multiinf, matcell(x), if inlist(multiinf,0,`i') & _st==1
matrix list x
tab multiinf ensidementia, matcell(y), if inlist(multiinf,0,`i') & _d==1
matrix list y
quietly: putexcel set "SipilaUKB_$$_DATE.xlsm", sheet("FIGURE sens dist VaD") modify
quietly: putexcel M`irow'=(x[2,1]), nformat(number)
quietly: putexcel N`irow'=(y[2,1]), nformat(number)

local ++irow
local ++irow
}

*P for trend
stcox multiinf i.supu i.ses
quietly: matrix n = r(table)
matrix list n
tempname p
scalar `p' = n[4,1]
quietly: putexcel set "SipilaUKB_$$_DATE.xlsm", sheet("FIGURE sens dist VaD") modify
quietly: putexcel O`prow'=(`p'), nformat(number_d4)

restore

```

\*\*\*\*\* One or several different pathogens \*\*\*\*\*

```

local dg_name `""Multiple organisms""
local idg_name `""Multiple_organisms""
local irow 37
local prow = `irow'

preserve
drop if ses==.
egen ensibactviralpvm = rowmin(ensibactinfpvm ensiviralinfpvm)
gen toinenbactviralpvm = ensibactviralpvm if ensibactinfpvm==ensiviralinfpvm &
ensibactinfpvm!=.
replace toinenbactviralpvm = ensibactinfpvm if ensibactinfpvm>ensiviralinfpvm &
ensibactinfpvm!=.
replace toinenbactviralpvm = ensiviralinfpvm if ensiviralinfpvm>ensibactinfpvm &
ensiviralinfpvm!=.
gen anybactviral = 1 if ensibactviralpvm!=.
gen toinenbactviral = 1 if toinenbactviralpvm!=.
egen lag_entry_bactviral = rowmax(lag_entry_anyinf ensibactviralpvm toinenbactviralpvm)

stset exitpvm, id(id) failure(dementiatype = 4) origin(time syntpvm) enter(time
lag_entry_bactviral) scale(365.25)
quietly: keep id anybactviral supu cohort exitpvm ensidementia syntpvm entrypvm ensi*pvm
*toinen* _st _d _origin _t _t0 ses anyanyinf
sum ensibactviralpvm toinenbactviralpvm
tab anybactviral if _st==1
tab toinenbactviral if _st==1

```



```

gen byte multiinf = 0 if anyanyinf==0
tab multiinf
tab multiinf if _st==1
replace multiinf = 1 if anybactviral==1
tab multiinf
tab multiinf if _st==1
replace multiinf = 2 if toinenbactviral==1
tab multiinf
tab multiinf if _st==1

quietly: stdescribe
stcox i.multiinf 2.supu#cohort 2.ses#cohort 3.ses#cohort, strata(cohort), if multiinf!=2
quietly: matrix m = r(table)
matrix list m
tempname hr1 ll1 ul1 hr2 ll2 ul2 N1 fail1 N2 fail2
scalar `hr1' = m[1,2]
scalar `ll1' = m[5,2]
scalar `ul1' = m[6,2]
scalar `N1' = e(N_sub)
scalar `fail1' = e(N_fail)
stcox i.multiinf 2.supu#cohort 2.ses#cohort 3.ses#cohort, strata(cohort), if multiinf!=1
quietly: matrix m = r(table)
matrix list m
scalar `hr2' = m[1,2]
scalar `ll2' = m[5,2]
scalar `ul2' = m[6,2]
scalar `N2' = e(N_sub)
scalar `fail2' = e(N_fail)

forvalues i =1/2 {
quietly: putexcel set "SipilaUKB_$$_DATE.xlsm", sheet("FIGURE sens dist VaD") modify
quietly: putexcel K`irow'=(`N`i'), nformat(number)
quietly: putexcel L`irow'=(`fail`i'), nformat(number)
quietly: putexcel E`irow'=(`hr`i'), nformat(number_d2)
quietly: putexcel F`irow'=(`ll`i'), nformat(number_d2)
quietly: putexcel G`irow'=(`ul`i'), nformat(number_d2)
quietly: putexcel B`irow'=("`idg_name`")
quietly: putexcel C`irow'="UKB"
quietly: putexcel D`irow'=("Different micro-organisms, infection No. `i'")
tab multiinf, matcell(x), if _st==1 & inlist(multiinf,0,`i')
matrix list x
tab multiinf ensidementia, matcell(y), if _d==1 & inlist(multiinf,0,`i')
matrix list y
quietly: putexcel set "SipilaUKB_$$_DATE.xlsm", sheet("FIGURE sens dist VaD") modify
quietly: putexcel M`irow'=(x[2,1]), nformat(number)
quietly: putexcel N`irow'=(y[2,1]), nformat(number)

local ++irow
local ++irow
}
*P for trend
stcox multiinf 2.supu#cohort 2.ses#cohort 3.ses#cohort, strata(cohort)
quietly: matrix n = r(table)
matrix list n
tempname p
scalar `p' = n[4,1]
quietly: putexcel set "SipilaUKB_$$_DATE.xlsm", sheet("FIGURE sens dist VaD") modify
quietly: putexcel O`prow'=(`p'), nformat(number_d4)

```

restore

\*\*\*\*\* NUMBER OF SIMULTANEOUS INFECTIONS \*\*\*\*\*

count

tab anyinfcount, mis

tab anyinfcount dementiatype, mis

tab anyinfcount, mis

tab anyinfcount ensidementia, mis

local dg infcount

local n\_dg: word count `dg'

local dg\_name `"'No. of simultaneous infections'"'

quietly: local irow = 23

local prow = `irow'

forvalues i=1/`n\_dg' {

preserve

quietly: local idg : word `i' of `dg'

quietly: local idg\_name : word `i' of `dg\_name'

display ""

display "`idg' followed by broad dementia, adjusted for sex and education"

display ""

display "Pooled IPD-analysis, normal model"

display ""

display "\$S\_TIME \$S\_DATE"

display ""

stset exitpvm, id(id) failure(dementiatype = 4) origin(time syntpvm) enter(time

lag\_entry\_anyinf) scale(365.25)

tab any`idg'

tab any`idg' \_d

quietly: stdescribe

quietly: local failures = `r(N\_fail)'

stcox i.any`idg' 2.supu#cohort 2.ses#cohort 3.ses#cohort, strata(cohort), if any`idg'!=2

quietly: matrix m = r(table)

matrix list m

tempname hr1 ll1 ul1 hr2 ll2 ul2 N1 fail1 N2 fail2

scalar `hr1' = m[1,2]

scalar `ll1' = m[5,2]

scalar `ul1' = m[6,2]

scalar `N1' = e(N\_sub)

scalar `fail1' = e(N\_fail)

stcox i.any`idg' 2.supu#cohort 2.ses#cohort 3.ses#cohort, strata(cohort), if any`idg'!=1

quietly: matrix m = r(table)

matrix list m

scalar `hr2' = m[1,2]

scalar `ll2' = m[5,2]

scalar `ul2' = m[6,2]

scalar `N2' = e(N\_sub)

scalar `fail2' = e(N\_fail)

forvalues i =1/2 {

quietly: putexcel set "SipilaUKB\_`S\_DATE'.xlsm", sheet("FIGURE sens dist VaD") modify

quietly: putexcel K`irow'=(`N`i'), nformat(number)

quietly: putexcel L`irow'=(`fail`i'), nformat(number)

```

quietly: putexcel E`irow'=(`hr`i'), nformat(number_d2)
quietly: putexcel F`irow'=(`ll`i'), nformat(number_d2)
quietly: putexcel G`irow'=(`ul`i'), nformat(number_d2)
quietly: putexcel B`irow'=("Simultaneous infection diagnoses")
quietly: putexcel C`irow'=("UKB")
quietly: putexcel D`irow'=("No. of simultaneous infection diagnoses = `i'")
tab any`idg', matcell(x), if _st==1
matrix list x
tab any`idg' ensidementia, matcell(y), if _d==1
matrix list y
quietly: putexcel set "SipilaUKB_$$_DATE.xlsm", sheet("FIGURE sens dist VaD") modify
local j = `i' + 1
quietly: putexcel M`irow'=(x[`j',1]), nformat(number)
quietly: putexcel N`irow'=(y[`j',1]), nformat(number)

local ++irow
local ++irow
}

*P for trend
stcox any`idg' i.supu i.ses
quietly: matrix n = r(table)
matrix list n
tempname p
scalar `p' = n[4,1]
quietly: putexcel set "SipilaUKB_$$_DATE.xlsm", sheet("FIGURE sens dist VaD") modify
quietly: putexcel O`prow'=(`p'), nformat(number_d4)

restore
}

```

\*FIGURE sensitivity, CNS vs other infections

```

tab anyanycns
tab anynoncns
tab anyanycns dementiatype
tab anynoncns dementiatype

```

```

local dg anycns noncns
local n_dg: word count `dg'
local dg_name ""Any CNS infection" "Any extra-CNS infection""
quietly: local irow = 28
forvalues i=1/`n_dg' {
preserve
quietly: local idg : word `i' of `dg'
quietly: local idg_name : word `i' of `dg_name'
display ""
display "`idg' followed by broad dementia, adjusted for sex and education"
display ""
display "UKB replication analysis, normal model and 5-year exclusion"
display ""
display "$$_TIME $$_DATE"
display ""

stset exitpvm, id(id) failure(dementiatype = 4) origin(time syntpvm) enter(time lag_entry_`idg')

scale(365.25)

tab any`idg'
tab any`idg' _d

```

```

stdescribe
quietly: local failures = `r(N_fail)'
stcox any`idg' i.supu i.ses
quietly: matrix m = r(table)
matrix list m
tempname hr ll ul
scalar `hr' = m[1,1]
scalar `ll' = m[5,1]
scalar `ul' = m[6,1]
quietly: putexcel set "SipilaUKB_$$_DATE.xlsm", sheet("FIGURE sens dist VaD") modify
quietly: putexcel K`irow'=(`e(N_sub)'), nformat(number)
quietly: putexcel L`irow'=(`e(N_fail)'), nformat(number)
quietly: putexcel E`irow'=(`hr'), nformat(number_d2)
quietly: putexcel F`irow'=(`ll'), nformat(number_d2)
quietly: putexcel G`irow'=(`ul'), nformat(number_d2)
quietly: putexcel B`irow'=("`idg'")
quietly: putexcel C`irow'=("UKB")
quietly: putexcel D`irow'=("`idg_name'")
tab any`idg', matcell(x), if _st==1
matrix list x
tab any`idg' ensidementia, matcell(y), if _d==1
matrix list y
quietly: putexcel set "SipilaUKB_$$_DATE.xlsm", sheet("FIGURE sens dist VaD") modify
quietly: putexcel M`irow'=(x[2,1]), nformat(number)
quietly: putexcel N`irow'=(y[2,1]), nformat(number)

local ++irow
local ++irow
restore
}

```

\*Difference between CNS infections and extra-CNS infections

\*CNS infection vs non cns infection

```

tab anycnsnotcns
tab anyanycns
tab anynoncns
tab anycnsnotcns dementiatype
tab anyanycns dementiatype
tab anynoncns dementiatype

```

```

local dg cnsnotcns
local n_dg: word count `dg'
local dg_name `"'CNS vs extra-CNS infection'"
quietly: local irow = 34
forvalues i=1/`n_dg' {
preserve
quietly: local idg : word `i' of `dg'
quietly: local idg_name : word `i' of `dg_name'
display ""
display "`idg' followed by broad dementia, adjusted for sex and education"
display ""
display "Pooled IPD-analysis"
display ""
display "$$_TIME $$_DATE"
display ""
}

```

```

                                stset exitpvm, id(id) failure(dementiatype = 4) origin(time syntpvm) enter(time
lag_entry_anyinf) scale(365.25)

gen byte anyeither = 1 if ensi`idg'pvm < exitpvm
replace anyeither = 0 if anyanyinf==0
tab any`idg'
tab any`idg' _d
tab anyeither
tab anyeither _d

stdescribe

gen `idg'_compare = 0 if anyanyinf==0
replace `idg'_compare = 1 if any`idg'==1
replace `idg'_compare = 2 if any`idg'==0
tab `idg'_compare
tab `idg'_compare _d
stcox i.`idg'_compare supu ses
test 1.`idg'_compare = 2.`idg'_compare

quietly: putexcel set "SipilaUKB_$$_DATE.xlsm", sheet("FIGURE sens dist VaD") modify
                                quietly: putexcel K`irow'=(`e(N_sub)'), nformat(number)
                                quietly: putexcel L`irow'=(`e(N_fail)'), nformat(number)
                                quietly: putexcel E`irow'=(`r(p)'), nformat(number_d2)
                                quietly: putexcel B`irow'=("`idg'")
                                quietly: putexcel C`irow'=("UKB")
                                quietly: putexcel D`irow'=("`idg_name'")

                                local ++irow

                                local ++irow
                                restore
                                }

log close

*** eTABLE 4 (former TABLE 2 ***
capture log close
log using "TABLE2.log", replace

capture gen hypertensio_combpvm = hypert_combpvm

local dg anyinf
local eks `"'no one" "hypertensio" "diabetes" "ihd" "cereb" "parkinson"'
local n_dg: word count `dg'
local n_eks: word count `eks'
local dg_name `"'Gram negative bacteria" "Herpesviruses"'
local eks_name `"'no one" "hypertension" "diabetes" "ischaemic heart disease" "cerebrovascular disease" "Parkinson's disease"'
quietly: local irow = 8
                                forvalues i=1/`n_dg' {
                                forvalues j=1/`n_eks' {
                                    preserve
                                    quietly: local idg : word `i' of `dg'
                                    quietly: local idg_name : word `i' of `dg_name'
                                    quietly: local ieks : word `j' of `eks'
                                    quietly: local ieks_name : word `j' of `eks_name'
                                    display ""
                                    display "`idg' followed by broad dementia, adjusted for sex and education and stratified by
cohort"

                                    display ""

```

```

display "Pooled IPD-analysis, normal model"
display ""
display "$S_TIME $S_DATE"
display ""

if inlist("`ieks`","hypertensio", "diabetes", "ihd", "cereb", "parkinson") {
drop if `ieks'_combpvm <= lag_entry_anyinf
}

stset exitpvm, id(id) failure(ensidementia) origin(time syntpvm) enter(time lag_entry_anyinf)

scale(365.25)

keep if _st==1

if "`ieks'"=="hypertensio" & "`idg'"=="anyinf" {
local irow = 25
}

quietly: capture keep id any`idg' supu cohort exitpvm ensidementia syntpvm entrypvm
ensi`idg'pvm _st _d _origin _t _t0 ses `ieks'_comb
tab any`idg'

quietly: stdescribe
quietly: local failures = `r(N_fail)'
stcox any`idg' 2.supu#cohort 2.ses#cohort 3.ses#cohort, strata(cohort)
quietly: matrix m = r(table)
tempname hr ll ul
scalar `hr' = m[1,1]
scalar `ll' = m[5,1]
scalar `ul' = m[6,1]
quietly: putexcel set "SipilaUKB_$$_DATE.xlsm", sheet("TABLE2") modify
quietly: putexcel K`irow'=(`e(N_sub)'), nformat(number)
quietly: putexcel L`irow'=(`e(N_fail)'), nformat(number)
quietly: putexcel E`irow'=(`hr'), nformat(number_d2)
quietly: putexcel F`irow'=(`ll'), nformat(number_d2)
quietly: putexcel G`irow'=(`ul'), nformat(number_d2)
quietly: putexcel B`irow'=("`idg'")
quietly: putexcel C`irow'="UKB"
quietly: putexcel D`irow'=("Those with `ieks_name' excluded")
tab any`idg', matcell(x), if _st==1
matrix list x
quietly: tab any`idg' _d, matcell(y), if _d==1
matrix list y
quietly: putexcel set "SipilaUKB_$$_DATE.xlsm", sheet("TABLE2") modify
quietly: putexcel M`irow'=(x[2,1]), nformat(number)
quietly: putexcel N`irow'=(y[2,1]), nformat(number)

local ++irow
restore
}
}

```

\*Early- vs late-onset dementia

```

local idg anyinf
quietly: stset exitpvm, id(id) failure(ensidementia) origin(time syntpvm) enter(time
lag_entry_anyinf) scale(365.25)
keep if _st==1
local idg anyinf
quietly: capture keep id any`idg' supu cohort exitpvm ensidementia syntpvm entrypvm
ensi`idg'pvm _st _d _origin _t _t0 ses

```

```

tab any`idg'

stsplit age65, at(64.999)
recode age65 64.999=1

preserve
keep if age65==0
local irow 12
quietly: stdescribe
quietly: local failures = `r(N_fail)'
stcox any`idg' 2.supu#cohort 2.ses#cohort 3.ses#cohort, strata(cohort)
quietly: matrix m = r(table)
tempname hr ll ul
scalar `hr' = m[1,1]
scalar `ll' = m[5,1]
scalar `ul' = m[6,1]
quietly: putexcel set "SipilaUKB_$$_DATE.xlsm", sheet("TABLE2") modify
    quietly: putexcel K`irow'=(`e(N_sub)'), nformat(number)
    quietly: putexcel L`irow'=(`e(N_fail)'), nformat(number)
    quietly: putexcel E`irow'=(`hr'), nformat(number_d2)
    quietly: putexcel F`irow'=(`ll'), nformat(number_d2)
    quietly: putexcel G`irow'=(`ul'), nformat(number_d2)
    quietly: putexcel B`irow'=("`idg'")
    quietly: putexcel C`irow'="UKB"
    quietly: putexcel D`irow'=("Early-onset dementia (onset before age 65)")
tab any`idg', matcell(x), if _st==1
matrix list x
quietly: tab any`idg' ensidementia, matcell(y), if _d==1
matrix list y
quietly: putexcel set "SipilaUKB_$$_DATE.xlsm", sheet("TABLE2") modify
    quietly: putexcel M`irow'=(x[2,1]), nformat(number)
    quietly: putexcel N`irow'=(y[2,1]), nformat(number)

restore

preserve
keep if age65==1
local irow 13
quietly: stdescribe
quietly: local failures = `r(N_fail)'
stcox any`idg' 2.supu#cohort 2.ses#cohort 3.ses#cohort, strata(cohort)
quietly: matrix m = r(table)
tempname hr ll ul
scalar `hr' = m[1,1]
scalar `ll' = m[5,1]
scalar `ul' = m[6,1]
quietly: putexcel set "SipilaUKB_$$_DATE.xlsm", sheet("TABLE2") modify
    quietly: putexcel K`irow'=(`e(N_sub)'), nformat(number)
    quietly: putexcel L`irow'=(`e(N_fail)'), nformat(number)
    quietly: putexcel E`irow'=(`hr'), nformat(number_d2)
    quietly: putexcel F`irow'=(`ll'), nformat(number_d2)
    quietly: putexcel G`irow'=(`ul'), nformat(number_d2)
    quietly: putexcel B`irow'=("`idg'")
    quietly: putexcel C`irow'="UKB"
    quietly: putexcel D`irow'=("Late-onset dementia (onset at or after age 65)")
tab any`idg', matcell(x), if _st==1
matrix list x
quietly: tab any`idg' ensidementia, matcell(y), if _d==1
matrix list y

```

```

quietly: putexcel set "SipilaUKB_$$_DATE.xlsm", sheet("TABLE2") modify
quietly: putexcel M`irow'=(x[2,1]), nformat(number)
quietly: putexcel N`irow'=(y[2,1]), nformat(number)
restore

```

\*Type of dementia

```

use "UKB_lag.dta", clear
gen cohort=1

tab dementiatyppi_laaja anyanyinf if ensidementia==1, col chi
local idg anyinf
local irow 15
local j 1
foreach type in AD FTD PD VD other unspecified {
    preserve

    display ""
    display "`type'"
    display ""
    local idg gramminus
    drop if ses==.

    stset exitpvm, id(id) failure(dementiatype==`j') origin(time syntpvm) enter(time
lag_entry_anyinf) scale(365.25)
    keep if _st==1

    local idg anyinf
    quietly: capture keep id any`idg' supu cohort exitpvm ensidementia syntpvm entrypvm
    ensi`idg'pvm _st _d _origin _t _t0 ses
    tab any`idg'

    quietly: stdescribe
    quietly: local failures = `r(N_fail)
    stcox any`idg' 2.supu#cohort 2.ses#cohort 3.ses#cohort, strata(cohort)
    quietly: matrix m = r(table)
    tempname hr ll ul
    scalar `hr' = m[1,1]
    scalar `ll' = m[5,1]
    scalar `ul' = m[6,1]
    quietly: putexcel set "SipilaUKB_$$_DATE.xlsm", sheet("TABLE2") modify
    quietly: putexcel K`irow'=(`e(N_sub)'), nformat(number)
    quietly: putexcel L`irow'=(`e(N_fail)'), nformat(number)
    quietly: putexcel E`irow'=(`hr'), nformat(number_d2)
    quietly: putexcel F`irow'=(`ll'), nformat(number_d2)
    quietly: putexcel G`irow'=(`ul'), nformat(number_d2)
    quietly: putexcel B`irow'=("`idg'")
    quietly: putexcel C`irow'="UKB"
    quietly: putexcel D`irow'=("`type'")

    tab any`idg', matcell(x), if _st==1
    matrix list x
    quietly: tab any`idg' _d, matcell(y), if _d==1
    matrix list y
    quietly: putexcel set "SipilaUKB_$$_DATE.xlsm", sheet("TABLE2") modify
    quietly: putexcel M`irow'=(x[2,1]), nformat(number)
    quietly: putexcel N`irow'=(y[2,1]), nformat(number)

    local ++irow
    local ++j

```



```

restore
}

```

\*Adjustments

\*Potential confounders

```

local dg anyinf
local eks alcocl smoking bmi_who all
local n_dg: word count `dg'
local n_eks: word count `eks'
local dg_name `"'Any infectious disease'"
local eks_name `"'heavy drinking" "smoking" "body mass index" "all three'"
quietly: local irow = 31
    forvalues i=1/'n_dg' {
        forvalues j=1/'n_eks' {
            quietly: local idg : word `i' of `dg'
            quietly: local idg_name : word `i' of `dg_name'
            quietly: local ieks : word `j' of `eks'
            quietly: local ieks_name : word `j' of `eks_name'
            display ""
            display "$S_TIME $S_DATE"
            display ""

            preserve
            drop if ses==.

            if "`iek'" == "all" {
                drop if alcocl==. | smoking==. | bmi_who==.
                count
            }
            else {
                tab `iek'
                drop if `iek' ==.
            }
            stset exitdate, id(id) failure(dementia) origin(time birthday) enter(time lag_entry_`idg')

scale(365.25)

            keep if _st==1 & ses!=.
            tab any`idg'
            tab any`idg'_d

            *Those with data on the covariate available but without adjustment
            stdescribe
            stcox any`idg' i.sex i.ses
            quietly: matrix m = r(table)
            tempname hr ll ul
            scalar `hr' = m[1,1]
            scalar `ll' = m[5,1]
            scalar `ul' = m[6,1]
            quietly: putexcel set "SipilaUKB_$$_DATE.xlsm", sheet("TABLE2") modify
                quietly: putexcel K`irow'=(`e(N_sub)'), nformat(number)
                quietly: putexcel L`irow'=(`e(N_fail)'), nformat(number)
                quietly: putexcel E`irow'=(`hr'), nformat(number_d2)
                quietly: putexcel F`irow'=(`ll'), nformat(number_d2)
                quietly: putexcel G`irow'=(`ul'), nformat(number_d2)
                quietly: putexcel B`irow'=("`idg'")
                quietly: putexcel D`irow'=("Data available for `iek_name'")
            tab any`idg', matcell(x), if _st==1
            matrix list x

```

```

tab any`idg' ensidementia, matcell(y), if _d==1
matrix list y
quietly: putexcel set "SipilaUKB_$$_DATE.xlsm", sheet("TABLE2") modify
               quietly: putexcel M`irow'=(x[2,1]), nformat(number)
               quietly: putexcel N`irow'=(y[2,1]), nformat(number)

local ++irow

*Those with data on the covariate available and adjusted
stdescribe
quietly: local failures = `r(N_fail)'
if ""`ieks'" == "all" {
stcox any`idg' sex i.ses i.alcocl i.smoking i.bmi_who
}
else {
stcox any`idg' sex i.ses i.`ieks'
}
quietly: matrix m = r(table)
tempname hr ll ul
scalar `hr' = m[1,1]
scalar `ll' = m[5,1]
scalar `ul' = m[6,1]
quietly: putexcel set "SipilaUKB_$$_DATE.xlsm", sheet("TABLE2") modify
               quietly: putexcel K`irow'=(`e(N_sub)'), nformat(number)
               quietly: putexcel L`irow'=(`e(N_fail)'), nformat(number)
               quietly: putexcel E`irow'=(`hr'), nformat(number_d2)
               quietly: putexcel F`irow'=(`ll'), nformat(number_d2)
               quietly: putexcel G`irow'=(`ul'), nformat(number_d2)
               quietly: putexcel B`irow'=("`idg'")
               quietly: putexcel D`irow'=("Additionally adjusted for `ieks_name'")

tab any`idg', matcell(x), if _st==1
matrix list x
tab any`idg' ensidementia, matcell(y), if _d==1
matrix list y
quietly: putexcel set "SipilaUKB_$$_DATE.xlsm", sheet("TABLE2") modify
               quietly: putexcel M`irow'=(x[2,1]), nformat(number)
               quietly: putexcel N`irow'=(y[2,1]), nformat(number)

local ++irow
local ++irow
restore
}
}

```

\*Potential period effect  
gen syntvuosi=year(birthday)

local dg anyinf

local n\_dg: word count `dg'

local dg\_name ""Any infectious disease""

local irow 22

forvalues i=1/'n\_dg' {

quietly: local idg : word `i' of `dg'

quietly: local idg\_name : word `i' of `dg\_name'

display ""

display ""`idg' followed by broad dementia, adjusted for sex and education and stratified by

cohort"

display ""

display "Pooled IPD-analysis, potential period effect"

display ""

```

display "$S_TIME $S_DATE"
display ""

drop if ses==.

quietly: stset exitpvm, id(id) failure(ensidementia) origin(time syntpvm) enter(time
lag_entry_anyinf) scale(365.25)
keep if _st==1
quietly: keep id any`idg' supu cohort exitpvm ensidementia /*failure*/ syntpvm entrypvm
ensid`idg'pvm _st_d_origin_t_t0 ses syntvuosi
tab any`idg'

quietly: stdescribe
quietly: local failures = `r(N_fail)'
stcox any`idg' 2.supu#cohort 2.ses#cohort 3.ses#cohort c.syntvuosi#cohort, strata(cohort)

quietly: matrix m = r(table)
tempname hr ll ul
scalar `hr' = m[1,1]
scalar `ll' = m[5,1]
scalar `ul' = m[6,1]
quietly: putexcel set "SipilaUKB_$$_DATE.xlsm", sheet("TABLE2") modify
quietly: putexcel K`irow'=(`e(N_sub)'), nformat(number)
quietly: putexcel L`irow'=(`e(N_fail)'), nformat(number)
quietly: putexcel E`irow'=(`hr'), nformat(number_d2)
quietly: putexcel F`irow'=(`ll'), nformat(number_d2)
quietly: putexcel G`irow'=(`ul'), nformat(number_d2)
quietly: putexcel B`irow'=("`idg'")
quietly: putexcel C`irow'="UKB"
quietly: putexcel D`irow'=("Adjusted for period effect")
tab any`idg', matcell(x), if _st==1
matrix list x
quietly: tab any`idg' ensidementia, matcell(y), if _d==1
matrix list y
quietly: putexcel set "SipilaUKB_$$_DATE.xlsm", sheet("TABLE2") modify
quietly: putexcel M`irow'=(x[2,1]), nformat(number)
quietly: putexcel N`irow'=(y[2,1]), nformat(number)

local irow 65
}

log close

```

\*\*\*\*\* TIME-DEPENDENT ANALYSIS \*\*\*\*\*

```

capture log close
log using "Sipila, infections and dementia, UKB replication $$_DATE, time-dependent.log", replace

```

\*\*\*\*\* eFIGURE 12 (TIME-DEPENDENT VERSION OF FIGURE 3) \*\*\*\*\*

```
*load data
```

```

replace toinenanyinf=0 if toinenanyinf==.
replace kolmasanyinf=0 if kolmasanyinf==.

```

```
gen cohort=1
```

```

local dg anyinf bactinf viralinf
local n_dg: word count `dg'
local dg_name `"'Any infectious disease" "Bacterial infection" "Viral infection"'
quietly: local irow = 7

```

```

forvalues i=1/\`n_dg' {
    quietly: local idg : word `i' of `dg'
    quietly: local idg_name : word `i' of `dg_name'
    display ""
    display "`idg' , adjusted for sex and education and other variables"
    display ""
    display "UKB replication analysis"
    display ""
    display "$S_TIME $S_DATE"
    display ""

```

```

/* Models
MODEL 1: adjusted for age (as the time scale), sex and ses
MODEL 2 = model 1 + those with HIV excluded
MODEL 3 = model 2 + those with missing data on alcohol, smoking, and bmi excluded
MODEL 4 = model 3 + adjusted for alcohol, smoking, bmic hypertension, diabetes
MODEL 5 = model 4 + those with data on apoe4 missing dropped
MODEL 6 = model 5 + adjusted for apoe4 genotype
*/

```

```

forvalues j=1/6 {

```

```

    preserve

```

```

    stset exitpvm, id(id) failure(ensidementia) origin(time syntpvm) enter(time entrypvm)

```

```

scale(365.25)

```

```

    tab any`idg'
    tab any`idg'_d
    sum diabetes_combpvm
    replace diabetes_combpvm = . if diabetes_combpvm>=exitpvm
    sum diabetes_combpvm
    gen dm = 1 if diabetes_combpvm < exitpvm
    tab dm
    sum hypert_combpvm
    replace hypert_combpvm = . if hypert_combpvm>=exitpvm
    sum hypert_combpvm
    gen htn = 1 if hypert_combpvm < exitpvm
    tab htn

```

```

    stsplit `idg'_split, at(0) after(time=ensidementia`idg'pvm)
    tab `idg'_split
    gen `idg'_timedep = 0
    replace `idg'_timedep = 1 if any`idg'==1 & `idg'_split==0
    tab `idg'_timedep
    tab any`idg' if `idg'_split!=-1

```

```

    stsplit dm_split, at(0) after(time=diabetes_combpvm)
    gen dm_timedep = 0
    replace dm_timedep = 1 if dm==1 & dm_split==0
    tab dm_timedep
    tab dm_timedep if dm_split!=-1 & `idg'_split!=-1

```

```

    stsplit htn_split, at(0) after(time=hypert_combpvm)

```

```

gen htn_timedep =0
replace htn_timedep = 1 if htn==1 & htn_split==0
tab htn_timedep
tab htn_timedep if htn_split!=-1 & `idg'_split!=-1 & dm_split!=-1

if `j'==1 {
di ""
di "MODEL 1: adjusted for age (as the time scale), sex and ses"
di ""
stdescribe
quietly: local failures = `r(N_fail)'
stcox `idg'_timedep i.supu i.ses
}
else if `j'==2 {
di ""
di "MODEL 2 = model 1 + those with HIV excluded"
di ""
drop if anyhiv==1
stdescribe
quietly: local failures = `r(N_fail)'
stcox `idg'_timedep i.supu i.ses
}
else if `j'==3 {
di ""
di "MODEL 3 = model 2 + those with missing data on alcohol, smoking, and bmi excluded"
di ""
drop if anyhiv==1
drop if tupakka==.
drop if alcocl==.
drop if bmi_who==.
stdescribe
quietly: local failures = `r(N_fail)'
stcox `idg'_timedep i.supu i.ses
}
else if `j'==4 {
di ""
di "MODEL 4 = model 3 + adjusted for alcohol, smoking, bmim hypertension, diabetes"
di ""
drop if anyhiv==1
drop if tupakka==.
drop if alcocl==.
drop if bmi_who==.
stdescribe
quietly: local failures = `r(N_fail)'
stcox `idg'_timedep i.supu i.ses i.tupakka i.alcocl i.bmi_who i.htn_timedep i.dm_timedep
}
else if `j'==5 {
di ""
di "MODEL 5 = model 4 + those with data on apoe4 missing dropped"
di ""
drop if anyhiv==1
drop if tupakka==.
drop if alcocl==.
drop if bmi_who==.
drop if apoe==.
stdescribe
quietly: local failures = `r(N_fail)'
stcox `idg'_timedep i.supu i.ses i.tupakka i.alcocl i.bmi_who i.htn_timedep i.dm_timedep
}

```

```

}
else if `j'==6 {
di ""
di "MODEL 6 = model 5 + adjusted for apoe4 genotype"
di ""
drop if anyhiv==1
drop if tupakka==.
drop if alcocl==.
drop if bmi_who==.
drop if apoe==.
stdescribe
quietly: local failures = `r(N_fail)'
stcox `idg'_timedep i.supu i.ses i.tupakka i.alcocl i.bmi_who i.htn_timedep i.dm_timedep i.apoe
}
quietly: matrix m = r(table)
tempname hr ll ul
scalar `hr' = m[1,1]
scalar `ll' = m[5,1]
scalar `ul' = m[6,1]
quietly: putexcel set "SipilaUKB_time-dep_$$_DATE.xlsx", sheet("FIGURE UKB") modify
quietly: putexcel K`irow'=(`e(N_sub)'), nformat(number)
quietly: putexcel L`irow'=(`e(N_fail)'), nformat(number)
quietly: putexcel E`irow'=(`hr'), nformat(number_d2)
quietly: putexcel F`irow'=(`ll'), nformat(number_d2)
quietly: putexcel G`irow'=(`ul'), nformat(number_d2)
quietly: putexcel B`irow'=("`idg'")
quietly: putexcel C`irow'=("UKB")
quietly: putexcel D`irow'=("`idg_name' model `j'")
tab any`idg', matcell(x), if `idg'_split!=-1 & htn_split!=-1 & dm_split!=-1
matrix list x
quietly: tab any`idg' ensidementia, matcell(y), if `idg'_split!=-1 & _d==1 & htn_split!=-1 &
dm_split!=-1

matrix list y
quietly: putexcel set "SipilaUKB_time-dep_$$_DATE.xlsx", sheet("FIGURE UKB") modify
quietly: putexcel M`irow'=(x[2,1]), nformat(number)
quietly: putexcel N`irow'=(y[2,1]), nformat(number)

local ++irow
restore
}
local ++irow
}

**** By type of dementia ****

*load data

replace toinenanyinf=0 if toinenanyinf==.
replace kolmasanyinf=0 if kolmasanyinf==.

gen cohort=1

local dg anyinf bactinf viralinf
local n_dg: word count `dg'
local dg_name ""Any infectious disease" "Bacterial infection" "Viral infection""

*Dementiatyyppit 1 = AD, 2 = V
foreach outcome in AD VD FTD PD {

```

```

if "`outcome'" == "AD" {
local type=1
}
else if "`outcome'" == "VD" {
local type=4
}
else if "`outcome'" == "FTD" {
local type=2
}
else if "`outcome'" == "PD" {
local type=3
}

quietly: local irow = 7

forvalues i=1/\`n_dg' {
    quietly: local idg : word `i' of `dg'
    quietly: local idg_name : word `i' of `dg_name'
    display ""
    display "`idg' , adjusted for sex and education and other variables"
    display ""
    display "UKB replication analysis"
    display ""
    display "$S_TIME $S_DATE"
    display ""

    /* Models
    MODEL 1: adjusted for age (as the time scale), sex and ses
    MODEL 2 = model 1 + those with HIV excluded
    MODEL 3 = model 2 + those with missing data on alcohol, smoking, and bmi excluded
    MODEL 4 = model 3 + adjusted for alcohol, smoking, bmmim hypertension, diabetes
    MODEL 5 = model 4 + those with data on apoe4 missing dropped
    MODEL 6 = model 5 + adjusted for apoe4 genotype
    */

forvalues j=1/6 {

    preserve

    stset exitpvm, id(id) failure(dementiatype==`type') origin(time syntpvm) enter(time entrypvm)

scale(365.25)

    tab any `idg'
    tab any `idg' _d
    sum diabetes_combpvm
    replace diabetes_combpvm = . if diabetes_combpvm>=exitpvm
    sum diabetes_combpvm
    gen dm = 1 if diabetes_combpvm < exitpvm
    tab dm
    sum hypert_combpvm
    replace hypert_combpvm = . if hypert_combpvm>=exitpvm
    sum hypert_combpvm
    gen htn = 1 if hypert_combpvm < exitpvm
    tab htn

    stsplot `idg'_split, at(0) after(time=ensi`idg'pvm)
    tab `idg'_split
    gen `idg'_timedep =0
    replace `idg'_timedep = 1 if any`idg'==1 & `idg'_split==0

```

```

tab `idg'_timedep
tab any`idg' if `idg'_split!=-1

stsplit dm_split, at(0) after(time=diabetes_combpvm)
gen dm_timedep =0
replace dm_timedep = 1 if dm==1 & dm_split==0
tab dm_timedep
tab dm_timedep if dm_split!=-1 & `idg'_split!=-1

stsplit htn_split, at(0) after(time=hypert_combpvm)
gen htn_timedep =0
replace htn_timedep = 1 if htn==1 & htn_split==0
tab htn_timedep
tab htn_timedep if htn_split!=-1 & `idg'_split!=-1 & dm_split!=-1

if `j'==1 {
di ""
di "MODEL 1: adjusted for age (as the time scale), sex and ses"
di ""
stdescribe
quietly: local failures = `r(N_fail)'
stcox `idg'_timedep i.supu i.ses
}
else if `j'==2 {
di ""
di "MODEL 2 = model 1 + those with HIV excluded"
di ""
drop if anyhiv==1
stdescribe
quietly: local failures = `r(N_fail)'
stcox `idg'_timedep i.supu i.ses
}
else if `j'==3 {
di ""
di "MODEL 3 = model 2 + those with missing data on alcohol, smoking, and bmi excluded"
di ""
drop if anyhiv==1
drop if tupakka==.
drop if alcocl==.
drop if bmi_who==.
stdescribe
quietly: local failures = `r(N_fail)'
stcox `idg'_timedep i.supu i.ses
}
else if `j'==4 {
di ""
di "MODEL 4 = model 3 + adjusted for alcohol, smoking, bmim hypertension, diabetes"
di ""
drop if anyhiv==1
drop if tupakka==.
drop if alcocl==.
drop if bmi_who==.
stdescribe
quietly: local failures = `r(N_fail)'
stcox `idg'_timedep i.supu i.ses i.tupakka i.alcocl i.bmi_who i.htn_timedep i.dm_timedep
}
else if `j'==5 {
di ""

```



```

di "MODEL 5 = model 4 + those with data on apoe4 missing dropped"
di ""
drop if anyhiv==1
drop if tupakka==.
drop if alcocl==.
drop if bmi_who==.
drop if apoe==.
stdescribe
quietly: local failures = `r(N_fail)'
stcox `idg'_timedep i.supu i.ses i.tupakka i.alcocl i.bmi_who i.htn_timedep i.dm_timedep
}
else if `j'==6 {
di ""
di "MODEL 6 = model 5 + adjusted for apoe4 genotype"
di ""
drop if anyhiv==1
drop if tupakka==.
drop if alcocl==.
drop if bmi_who==.
drop if apoe==.
stdescribe
quietly: local failures = `r(N_fail)'
stcox `idg'_timedep i.supu i.ses i.tupakka i.alcocl i.bmi_who i.htn_timedep i.dm_timedep i.apoe
}
quietly: matrix m = r(table)
tempname hr ll ul
scalar `hr' = m[1,1]
scalar `ll' = m[5,1]
scalar `ul' = m[6,1]
quietly: putexcel set "SipilaUKB_time-dep_$$_DATE.xlsx", sheet("FIGURE UKB, `outcome'")

quietly: putexcel K`irow'=(`e(N_sub)'), nformat(number)
quietly: putexcel L`irow'=(`e(N_fail)'), nformat(number)
quietly: putexcel E`irow'=(`hr'), nformat(number_d2)
quietly: putexcel F`irow'=(`ll'), nformat(number_d2)
quietly: putexcel G`irow'=(`ul'), nformat(number_d2)
quietly: putexcel B`irow'=("`idg'")
quietly: putexcel C`irow'=("UKB")
quietly: putexcel D`irow'=("`idg_name' model `j'")
tab any`idg', matcell(x), if `idg'_split!=-1 & htn_split!=-1 & dm_split!=-1
matrix list x
quietly: tab any`idg' ensidementia, matcell(y), if `idg'_split!=-1 & _d==1 & htn_split!=-1 &
dm_split!=-1

matrix list y
quietly: putexcel set "SipilaUKB_time-dep_$$_DATE.xlsx", sheet("FIGURE UKB, `outcome'")

quietly: putexcel M`irow'=(x[2,1]), nformat(number)
quietly: putexcel N`irow'=(y[2,1]), nformat(number)

local ++irow
restore
}
local ++irow
}
}

```

modify

dm\_split!=-1

modify

}

log close

```

capture log close
log using "Sipila, UKB infection burden $$_DATE, time-dependent.log", replace

replace toinenanyinf=0 if toinenanyinf==.
replace kolmasanyinf=0 if kolmasanyinf==.

capture gen cohort=1

***** TIME-DEPENDENT: SINGLE VS MULTIPLE INFECTIONS *****

count
tab toinenanyinf, mis
tab kolmasanyinf, mis

tab anyanyinf if ensianyinfpvm<exitpvm & ensianyinfpvm < ensitoinenanyinfpvm
tab toinenanyinf if ensitoinenanyinfpvm<exitpvm & ensitoinenanyinfpvm < ensikolmasanyinfpvm
tab kolmasanyinf if ensikolmasanyinfpvm<exitpvm

tab anyanyinf if ensianyinfpvm<exitpvm & ensianyinfpvm < ensitoinenanyinfpvm & ensitoinenanyinfpvm>=exitpvm
tab toinenanyinf if ensitoinenanyinfpvm<exitpvm & ensitoinenanyinfpvm < ensikolmasanyinfpvm &
ensikolmasanyinfpvm>=exitpvm
tab kolmasanyinf if ensikolmasanyinfpvm<exitpvm

tab ensidementia if ensianyinfpvm<exitpvm & ensitoinenanyinfpvm>=exitpvm
tab ensidementia if ensitoinenanyinfpvm<exitpvm & ensikolmasanyinfpvm>=exitpvm
tab ensidementia if ensikolmasanyinfpvm<exitpvm

sum ensianyinfpvm
replace ensianyinfpvm = . if ensianyinfpvm>=exitpvm
sum ensianyinfpvm

sum ensitoinenanyinfpvm
replace ensitoinenanyinfpvm = . if ensitoinenanyinfpvm>=exitpvm
sum ensitoinenanyinfpvm

sum ensikolmasanyinfpvm
replace ensikolmasanyinfpvm = . if ensikolmasanyinfpvm>=exitpvm
sum ensikolmasanyinfpvm

replace toinenanyinf = . if ensitoinenanyinfpvm==.
replace kolmasanyinf = . if ensikolmasanyinfpvm==.

local dg_name ""Multiple infections""
local irow 16
local prow = `irow'

                                preserve
                                stset exitpvm, id(id) failure(ensidementia) origin(time syntpvm) enter(time entrypvm)

scale(365.25)

                                stsplit first_split, at(0) after(time=ensianyinfpvm)
                                gen multiinf_timedep =0
                                tab multiinf_timedep
                                replace multiinf_timedep = 1 if anyanyinf==1 & first_split==0
                                tab multiinf_timedep
                                stsplit second_split, at(0) after(time=ensitoinenanyinfpvm)
                                replace multiinf_timedep = 2 if toinenanyinf==1 & second_split==0
                                tab multiinf_timedep
                                stsplit third_split, at(0) after(time=ensikolmasanyinfpvm)

```

```

replace multiinf_timedep = 3 if kolmasanyinf==1 & third_split==0
tab multiinf_timedep

```

```

stdescribe
quietly: local failures = `r(N_fail)'
stcox i.multiinf_timedep i.supu i.ses
quietly: matrix m = r(table)
matrix list m
tempname hr1 ll1 ul1 hr2 ll2 ul2 hr3 ll3 ul3
scalar `hr1' = m[1,2]
scalar `ll1' = m[5,2]
scalar `ul1' = m[6,2]
scalar `hr2' = m[1,3]
scalar `ll2' = m[5,3]
scalar `ul2' = m[6,3]
scalar `hr3' = m[1,4]
scalar `ll3' = m[5,4]
scalar `ul3' = m[6,4]

```

```

forvalues i =1/3 {
quietly: putexcel set "UKB infection burden time-dep $$_DATE.xlsm", sheet("FIGURE sensitivity")

```

modify

```

quietly: putexcel K`irow'=(`e(N_sub)'), nformat(number)
quietly: putexcel L`irow'=(`e(N_fail)'), nformat(number)
quietly: putexcel E`irow'=(`hr`i'), nformat(number_d2)
quietly: putexcel F`irow'=(`ll`i'), nformat(number_d2)
quietly: putexcel G`irow'=(`ul`i'), nformat(number_d2)
quietly: putexcel B`irow'=("Multiinf")
quietly: putexcel C`irow'=("UKB")
quietly: putexcel D`irow'=("Single vs multiple infections, infection No. `i'")
tab multiinf_timedep, matcell(x), if first_split!=-1 & second_split!=-1 & third_split!=-1
matrix list x
tab multiinf_timedep ensidementia, matcell(y), if first_split!=-1 & second_split!=-1 &

```

third\_split!=-1 & \_d==1

```

matrix list y
quietly: putexcel set "UKB infection burden time-dep $$_DATE.xlsm", sheet("FIGURE sensitivity")

```

modify

```

local j = `i' + 1
quietly: putexcel M`irow'=(x[`j',1]), nformat(number)
quietly: putexcel N`irow'=(y[`j',1]), nformat(number)

local ++irow
local ++irow
}

```

```

*P for trend
stcox multiinf_timedep i.supu i.ses
quietly: matrix n = r(table)
matrix list n
tempname p
scalar `p' = n[4,1]
quietly: putexcel set "UKB infection burden time-dep $$_DATE.xlsm", sheet("FIGURE sensitivity")

```

modify

```

quietly: putexcel O`prow'=(`p'), nformat(number)

```

```

restore

```

\*\*\*\*\*TIME-DEPENDENT: One or several different pathogens \*\*\*\*\*

local dg\_name `""Multiple organisms""`

local idg\_name `""Multiple\_organisms""`

local irow 37

local prow = `irow`

preserve

drop if ses==.

egen ensibactviralpvm = rowmin(ensibactinfpvm ensiviralinfpvm)

gen toinenbactviralpvm = ensibactviralpvm if ensibactinfpvm==ensiviralinfpvm &

ensibactinfpvm!=.

replace toinenbactviralpvm = ensibactinfpvm if ensibactinfpvm>ensiviralinfpvm &

ensibactinfpvm!=.

replace toinenbactviralpvm = ensiviralinfpvm if ensiviralinfpvm>ensibactinfpvm &

ensiviralinfpvm!=.

gen anybactviral = 1 if ensibactviralpvm!=.

gen toinenbactviral = 1 if toinenbactviralpvm!=.

quietly: stset exitpvm, id(id) failure(ensidementia) origin(time syntpvm) enter(time entrypvm)

scale(365.25)

quietly: keep id anybactviral supu cohort exitpvm ensidementia syntpvm entrypvm ensi\*pvm

\*toinen\* \_st\_d\_origin\_t\_t0 ses

sum ensibactviralpvm toinenbactviralpvm

tab anybactviral

tab anybactviral if toinenbactviral!=1

tab toinenbactviral

tab anybactviral ensidementia

tab anybactviral ensidementia if toinenbactviral!=1

tab toinenbactviral ensidementia

stsplit first\_split, at(0) after(time=ensibactviralpvm)

gen multiinf\_timedep =0

tab multiinf\_timedep

replace multiinf\_timedep = 1 if anybactviral==1 & first\_split==0

tab multiinf\_timedep

stsplit second\_split, at(0) after(time=toinenbactviralpvm)

replace multiinf\_timedep = 2 if toinenbactviral==1 & second\_split==0

tab multiinf\_timedep

quietly: stdescribe

quietly: local failures = `r(N\_fail)`

stcox i.multiinf\_timedep 2.supu#cohort 2.ses#cohort 3.ses#cohort, strata(cohort)

quietly: matrix m = r(table)

matrix list m

tempname hr1 ll1 ul1 hr2 ll2 ul2

scalar `hr1' = m[1,2]

scalar `ll1' = m[5,2]

scalar `ul1' = m[6,2]

scalar `hr2' = m[1,3]

scalar `ll2' = m[5,3]

scalar `ul2' = m[6,3]

forvalues i =1/2 {

quietly: putexcel set "UKB infection burden time-dep \$\$\_DATE.xlsx", sheet("FIGURE sensitivity")

modify

quietly: putexcel K`irow'=(`e(N\_sub)'), nformat(number)

```

quietly: putexcel L`irow'=(`e(N_fail)'), nformat(number)
quietly: putexcel E`irow'=(`hr`i"), nformat(number_d2)
quietly: putexcel F`irow'=(`ll`i"), nformat(number_d2)
quietly: putexcel G`irow'=(`ul`i"), nformat(number_d2)
quietly: putexcel B`irow'=("`idg_name")
quietly: putexcel C`irow'=("UKB")
quietly: putexcel D`irow'=("Different micro-organisms, infection No. `i")
tab multiinf_timedep, matcell(x), if first_split!=-1 & second_split!=-1
matrix list x
tab multiinf_timedep ensidementia, matcell(y), if first_split!=-1 & second_split!=-1 & _d==1
matrix list y
quietly: putexcel set "UKB infection burden time-dep $$_DATE.xlsm", sheet("FIGURE sensitivity")

modify

local j = `i' + 1
quietly: putexcel M`irow'=(x[`j',1]), nformat(number)
quietly: putexcel N`irow'=(y[`j',1]), nformat(number)

local ++irow
local ++irow
}
*P for trend
stcox multiinf_timedep 2.supu#cohort 2.ses#cohort 3.ses#cohort, strata(cohort)
quietly: matrix n = r(table)
matrix list n
tempname p
scalar `p' = n[4,1]
quietly: putexcel set "UKB infection burden time-dep $$_DATE.xlsm", sheet("FIGURE sensitivity")

modify

quietly: putexcel Q`prow'=(`p'), nformat(number)

restore

*****TIME-DEPENDENT: NUMBER OF SIMULTANEOUS INFECTIONS *****

count
tab anyinfcount, mis
tab anyinfcount ensidementia, mis
replace anyinfcount = . if ensianynfpvm>=exitpvm
tab anyinfcount, mis
tab anyinfcount ensidementia, mis
capture gen ensiinfcountpvm=ensianynfpvm if anyinfcount!=0 & anyinfcount!=.

local dg infcount
local n_dg: word count `dg'
local dg_name ""No. of simultaneous infections""

quietly: local irow = 23
local prow = `irow'
forvalues i=1/'n_dg' {
preserve
quietly: local idg : word `i' of `dg'
quietly: local idg_name : word `i' of `dg_name'
display ""
display ""`idg' followed by broad dementia, adjusted for sex and education"
display ""
display "Pooled IPD-analysis, normal model"
display ""
}

```

```
display "$S_TIME $S_DATE"
display ""
```

scale(365.25)

```
quietly: stset exitpvm, id(id) failure(ensidementia) origin(time syntpvm) enter(time entrypvm)
```

```
tab any`idg`
replace any`idg` = 2 if any`idg`>2 & any`idg`<.
tab any`idg`
stsplit `idg`_split, at(0) after(time=ensi`idg`pvm)
tab `idg`_split
gen `idg`_timedep = 0
replace `idg`_timedep = any`idg` if inlist(any`idg`,1,2) & `idg`_split==0
tab `idg`_timedep
tab any`idg` if `idg`_split!=-1
```

```
stdescribe
quietly: local failures = `r(N_fail)`
stcox i.`idg`_timedep i.supu i.ses
quietly: matrix m = r(table)
matrix list m
tempname hr1 ll1 ul1 hr2 ll2 ul2 hr3 ll3 ul3
scalar `hr1` = m[1,2]
scalar `ll1` = m[5,2]
scalar `ul1` = m[6,2]
scalar `hr2` = m[1,3]
scalar `ll2` = m[5,3]
scalar `ul2` = m[6,3]
scalar `hr3` = m[1,4]
scalar `ll3` = m[5,4]
scalar `ul3` = m[6,4]
```

modify

```
forvalues i = 1/2 {
quietly: putexcel set "UKB infection burden time-dep $S_DATE.xlsx", sheet("FIGURE sensitivity")
```

```
quietly: putexcel K`irow`=(`e(N_sub)`), nformat(number)
quietly: putexcel L`irow`=(`e(N_fail)`), nformat(number)
quietly: putexcel E`irow`=(`hr`i`), nformat(number_d2)
quietly: putexcel F`irow`=(`ll`i`), nformat(number_d2)
quietly: putexcel G`irow`=(`ul`i`), nformat(number_d2)
quietly: putexcel B`irow`=("Simultaneous infection diagnoses")
quietly: putexcel C`irow`=("UKB")
quietly: putexcel D`irow`=("No. of simultaneous infection diagnoses = `i`")
```

```
tab `idg`_timedep, matcell(x), if `idg`_split!=-1
matrix list x
tab `idg`_timedep ensidementia, matcell(y), if `idg`_split!=-1 & _d==1
matrix list y
quietly: putexcel set "UKB infection burden time-dep $S_DATE.xlsx", sheet("FIGURE sensitivity")
```

modify

```
local j = `i` + 1
quietly: putexcel M`irow`=(x[`j`,1]), nformat(number)
quietly: putexcel N`irow`=(y[`j`,1]), nformat(number)

local ++irow
local ++irow
}

*P for trend
stcox `idg`_timedep i.supu i.ses
quietly: matrix n = r(table)
```

```

matrix list n
tempname p
scalar `p' = n[4,1]
quietly: putexcel set "UKB infection burden time-dep $$_DATE.xlsx", sheet("FIGURE sensitivity")

modify
                                quietly: putexcel O`prow'=(`p'), nformat(number)

                                local irow 24

                                restore
                                }

*TIME-DEPENDENT: FIGURE sensitivity, CNS vs other infections
count
tab anyanycns
recode anyanycns .=0
tab anyanycns
tab anynoncns
recode anynoncns .=0
tab anynoncns
replace anyanycns=0 if ensianycnspvm>=exitpvm
replace anynoncns=0 if ensinoncnspvm>=exitpvm
replace ensianycnspvm=. if ensianycnspvm>=exitpvm
replace ensinoncnspvm=. if ensinoncnspvm>=exitpvm
tab anyanycns
tab anynoncns
tab anyanycns ensidementia
tab anynoncns ensidementia

local dg anycns noncns
local n_dg: word count `dg'
local dg_name `"'Any CNS infection" "Any extra-CNS infection"'
quietly: local irow = 28
                                forvalues i=1/'n_dg' {
                                    preserve
                                    quietly: local idg : word `i' of `dg'
                                    quietly: local idg_name : word `i' of `dg_name'
                                    display ""
                                    display "`idg' followed by broad dementia, adjusted for sex and education"
                                    display ""
                                    display "UKB replication analysis, normal model and 5-year exclusion"
                                    display ""
                                    display "$_TIME $_DATE"
                                    display ""

                                stset exitpvm, id(id) failure(ensidementia) origin(time syntpvm) enter(time entrypvm)

scale(365.25)

                                tab any`idg'
                                stsplint `idg'_split, at(0) after(time=ensi`idg'pvm)
                                tab `idg'_split
                                gen `idg'_timedep =0
                                replace `idg'_timedep = 1 if any`idg'==1 & `idg'_split==0
                                tab `idg'_timedep
                                tab any`idg' if `idg'_split!=-1

                                stdescribe

```

```

quietly: local failures = `r(N_fail)'
stcox `idg'_timedep i.supu i.ses
quietly: matrix m = r(table)
matrix list m
tempname hr ll ul
scalar `hr' = m[1,1]
scalar `ll' = m[5,1]
scalar `ul' = m[6,1]
quietly: putexcel set "UKB infection burden time-dep $$_DATE.xlsm", sheet("FIGURE sensitivity")
modify
quietly: putexcel K`irow'=(`e(N_sub)'), nformat(number)
quietly: putexcel L`irow'=(`e(N_fail)'), nformat(number)
quietly: putexcel E`irow'=(`hr'), nformat(number_d2)
quietly: putexcel F`irow'=(`ll'), nformat(number_d2)
quietly: putexcel G`irow'=(`ul'), nformat(number_d2)
quietly: putexcel B`irow'=("`idg'")
quietly: putexcel C`irow'=("UKB")
quietly: putexcel D`irow'=("`idg_name'")
tab any`idg', matcell(x), if `idg'_split!=-1
matrix list x
tab any`idg' ensidementia, matcell(y), if `idg'_split!=-1 & _d==1
matrix list y
quietly: putexcel set "UKB infection burden time-dep $$_DATE.xlsm", sheet("FIGURE sensitivity")
modify
quietly: putexcel M`irow'=(x[2,1]), nformat(number)
quietly: putexcel N`irow'=(y[2,1]), nformat(number)
local ++irow
local ++irow
restore
}

```

\*TIME-DEPENDENT: Difference between CNS infections and extra-CNS infections

```

*CNS infection vs non cns infection
capture gen byte anycnsnotcns = 1 if ensianycnspvm==ensianyinfpvm & anyanycns==1 &
ensianyinfpvm<exitpvm
replace anycnsnotcns = 0 if ensinoncspvm==ensianyinfpvm & anycnsnotcns!=1 & anynoncns==1 &
ensianyinfpvm<exitpvm
capture gen ensicnsnotcnspvm = ensianyinfpvm if ensianyinfpvm < exitpvm
count
sum ensicnsnotcnspvm
tab anycnsnotcns
tab anyanycns
tab anynoncns
tab anycnsnotcns ensidementia
tab anyanycns ensidementia
tab anynoncns ensidementia

```

```

local dg cnsnotcns
local n_dg: word count `dg'
local dg_name ""CNS vs extra-CNS infection""
quietly: local irow = 34
forvalues i=1/'n_dg' {
preserve
quietly: local idg : word `i' of `dg'
quietly: local idg_name : word `i' of `dg_name'
display ""

```



```

display "`idg' followed by broad dementia, adjusted for sex and education"
display ""
display "Pooled IPD-analysis"
display ""
display "$S_TIME $S_DATE"
display ""

```

scale(365.25)

```

stset exitpvm, id(id) failure(ensidementia) origin(time syntpvm) enter(time entrypvm)

```

```

gen byte anyeither = ensi`idg'pvm < exitpvm
tab any`idg'
tab anyeither

```

```

stsplit `idg'_split, at(0) after(time=ensi`idg'pvm)
tab `idg'_split
gen `idg'_timedep =0
replace `idg'_timedep = 1 if anyeither==1 & `idg'_split==0
tab `idg'_timedep
tab anyeither if `idg'_split!=-1

```

```

stdescribe
quietly: local failures = `r(N_fail)'  


```

```

tab anyeither if `idg'_split!=-1
tab `idg'_timedep
recode `idg'_timedep 1=2 if any`idg'==0
tab `idg'_timedep
stcox i.`idg'_timedep supu ses
test 1.`idg'_timedep = 2.`idg'_timedep

```

```

quietly: putexcel set "UKB infection burden time-dep $S_DATE.xlsm", sheet("FIGURE sensitivity")

```

modify

```

quietly: putexcel K`irow'=(`e(N_sub)'), nformat(number)
quietly: putexcel L`irow'=(`e(N_fail)'), nformat(number)
quietly: putexcel E`irow'=(`r(p)'), nformat(number_d2)
quietly: putexcel B`irow'=("`idg'")
quietly: putexcel C`irow'=("UKB")
quietly: putexcel D`irow'=("`idg_name'")

local ++irow

local ++irow
restore
}

```

\*\*\*\*TIME-DEPENDENT: Analysis ALZHEIMER'S DISEASE \*\*\*\*

\*\*\*\*\*TIME-DEPENDENT: SINGLE VS MULTIPLE INFECTIONS \*\*\*\*\*

count

tab toinenanyinf, mis

tab kolmasanyinf, mis

tab anyanyinf if ensianyinfpvm<exitpvm & ensianyinfpvm < ensitoinenanyinfpvm

tab toinenanyinf if ensitoinenanyinfpvm<exitpvm & ensitoinenanyinfpvm < ensikolmasanyinfpvm

tab kolmasanyinf if ensikolmasanyinfpvm<exitpvm

tab anyanyinf if ensianyinfpvm<exitpvm & ensianyinfpvm < ensitoinenanyinfpvm & ensitoinenanyinfpvm>=exitpvm

tab toinenanyinf if ensitoinenanyinfpvm<exitpvm & ensitoinenanyinfpvm < ensikolmasanyinfpvm &

ensikolmasanyinfpvm>=exitpvm

tab kolmasanyinf if ensikolmasanyinfpvm<exitpvm

tab dementiatype if ensianyinfpvm<exitpvm & ensitoinenanyinfpvm>=exitpvm

tab dementiatype if ensitoinenanyinfpvm<exitpvm & ensikolmasanyinfpvm>=exitpvm

tab dementiatype if ensikolmasanyinfpvm<exitpvm

sum ensianyinfpvm

replace ensianyinfpvm = . if ensianyinfpvm>=exitpvm

sum ensianyinfpvm

sum ensitoinenanyinfpvm

replace ensitoinenanyinfpvm = . if ensitoinenanyinfpvm>=exitpvm

sum ensitoinenanyinfpvm

sum ensikolmasanyinfpvm

replace ensikolmasanyinfpvm = . if ensikolmasanyinfpvm>=exitpvm

sum ensikolmasanyinfpvm

replace toinenanyinf = . if ensitoinenanyinfpvm==.

replace kolmasanyinf = . if ensikolmasanyinfpvm==.

local dg\_name ""Multiple infections""

local irow 16

local prow = `irow'

preserve

stset exitpvm, id(id) failure(dementiatype==1) origin(time syntpvm) enter(time entrypvm)

scale(365.25)

stsplot first\_split, at(0) after(time=ensianyinfpvm)

gen multiinf\_timedep =0

tab multiinf\_timedep

replace multiinf\_timedep = 1 if anyanyinf==1 & first\_split==0

```

tab multiinf_timedep
stsplrit second_split, at(0) after(time=ensitoinenanyinfpvm)
replace multiinf_timedep = 2 if toinenanyinf==1 & second_split==0
tab multiinf_timedep
stsplrit third_split, at(0) after(time=ensikolmasanyinfpvm)
replace multiinf_timedep = 3 if kolmasanyinf==1 & third_split==0
tab multiinf_timedep

```

```

stdescribe
quietly: local failures = `r(N_fail)'
stcox i.multiinf_timedep i.supu i.ses
quietly: matrix m = r(table)
matrix list m
tempname hr1 ll1 ul1 hr2 ll2 ul2 hr3 ll3 ul3
scalar `hr1' = m[1,2]
scalar `ll1' = m[5,2]
scalar `ul1' = m[6,2]
scalar `hr2' = m[1,3]
scalar `ll2' = m[5,3]
scalar `ul2' = m[6,3]
scalar `hr3' = m[1,4]
scalar `ll3' = m[5,4]
scalar `ul3' = m[6,4]

```

```

forvalues i =1/3 {
quietly: putexcel set "UKB infection burden time-dep $$_DATE.xlsm", sheet("FIGURE sensitivity

```

AD") modify

```

quietly: putexcel K`irow'=(`e(N_sub)'), nformat(number)
quietly: putexcel L`irow'=(`e(N_fail)'), nformat(number)
quietly: putexcel E`irow'=(`hr`i'), nformat(number_d2)
quietly: putexcel F`irow'=(`ll`i'), nformat(number_d2)
quietly: putexcel G`irow'=(`ul`i'), nformat(number_d2)
quietly: putexcel B`irow'=("Multiinf")
quietly: putexcel C`irow'=("UKB")
quietly: putexcel D`irow'=("Single vs multiple infections, infection No. `i'")

```

```

tab multiinf_timedep, matcell(x), if first_split!=-1 & second_split!=-1 & third_split!=-1
matrix list x
tab multiinf_timedep dementiatype, matcell(y), if first_split!=-1 & second_split!=-1 &

```

third\_split!=-1 & \_d==1

```

matrix list y
quietly: putexcel set "UKB infection burden time-dep $$_DATE.xlsm", sheet("FIGURE sensitivity

```

AD") modify

```

local j = `i' + 1
quietly: putexcel M`irow'=(x[`j',1]), nformat(number)
quietly: putexcel N`irow'=(y[`j',1]), nformat(number)

```

```

local ++irow
local ++irow
}

```

```

*P for trend
stcox multiinf_timedep i.supu i.ses
quietly: matrix n = r(table)
matrix list n

```

```

tempname p
scalar `p' = n[4,1]
quietly: putexcel set "UKB infection burden time-dep $$_DATE.xlsm", sheet("FIGURE sensitivity

```

AD") modify

```
quietly: putexcel O`prow'=(`p'), nformat(number)
```

```
restore
```

```
*****TIME-DEPENDENT: One or several different pathogens*****
```

```
local dg_name `"'Multiple organisms'"`
```

```
local idg_name `"'Multiple_organisms'"`
```

```
local irow 37
```

```
local prow = `irow'
```

```
preserve
```

```
drop if ses==.
```

```
egen ensibactviralpvm = rowmin(ensibactinfpvm ensiviralinfpvm)
```

```
gen toinenbactviralpvm = ensibactviralpvm if ensibactinfpvm==ensiviralinfpvm &
```

```
ensibactinfpvm!=.
```

```
replace toinenbactviralpvm = ensibactinfpvm if ensibactinfpvm>ensiviralinfpvm &
```

```
ensibactinfpvm!=.
```

```
replace toinenbactviralpvm = ensiviralinfpvm if ensiviralinfpvm>ensibactinfpvm &
```

```
ensiviralinfpvm!=.
```

```
gen anybactviral = 1 if ensibactviralpvm!=.
```

```
gen toinenbactviral = 1 if toinenbactviralpvm!=.
```

```
tab anybactviral
```

```
tab anybactviral if toinenbactviral!=1
```

```
tab toinenbactviral
```

```
tab anybactviral dementiatype
```

```
tab anybactviral dementiatype if toinenbactviral!=1
```

```
tab toinenbactviral dementiatype
```

```
quietly: stset exitpvm, id(id) failure(dementiatype==1) origin(time syntpvm) enter(time
```

```
entrypvm) scale(365.25)
```

```
quietly: keep id anybactviral supu cohort exitpvm ensidementia syntpvm entrypvm ensi*pvm
```

```
*toinen* _st_d_origin_t_t0 ses
```

```
sum ensibactviralpvm toinenbactviralpvm
```

```
tab anybactviral
```

```
tab toinenbactviral
```

```
stsplit first_split, at(0) after(time=ensibactviralpvm)
```

```
gen multiinf_timedep =0
```

```
tab multiinf_timedep
```

```
replace multiinf_timedep = 1 if anybactviral==1 & first_split==0
```

```
tab multiinf_timedep
```

```
stsplit second_split, at(0) after(time=toinenbactviralpvm)
```

```
replace multiinf_timedep = 2 if toinenbactviral==1 & second_split==0
```

```
tab multiinf_timedep
```

```
quietly: stdescribe
```

```
quietly: local failures = `r(N_fail)'
```

```
stcox i.multiinf_timedep 2.supu#cohort 2.ses#cohort 3.ses#cohort, strata(cohort)
```

```
quietly: matrix m = r(table)
```

```
matrix list m
```

```
tempname hr1 ll1 ul1 hr2 ll2 ul2
```

```
scalar `hr1' = m[1,2]
```

```
scalar `ll1' = m[5,2]
```

```
scalar `ul1' = m[6,2]
```

```
scalar `hr2' = m[1,3]
```

```

scalar `ll2' = m[5,3]
scalar `ul2' = m[6,3]

forvalues i =1/2 {
quietly: putexcel set "UKB infection burden time-dep $$_DATE.xlsm", sheet("FIGURE sensitivity
AD") modify

quietly: putexcel K`irow'=(`e(N_sub)'), nformat(number)
quietly: putexcel L`irow'=(`e(N_fail)'), nformat(number)
quietly: putexcel E`irow'=(`hr`i'), nformat(number_d2)
quietly: putexcel F`irow'=(`ll`i'), nformat(number_d2)
quietly: putexcel G`irow'=(`ul`i'), nformat(number_d2)
quietly: putexcel B`irow'=("`idg_name")
quietly: putexcel C`irow'=("UKB")
quietly: putexcel D`irow'=("Different micro-organisms, infection No. `i")
tab multiinf_timedep, matcell(x), if first_split!=-1 & second_split!=-1
matrix list x
tab multiinf_timedep ensidementia, matcell(y), if first_split!=-1 & second_split!=-1 & _d==1
matrix list y
quietly: putexcel set "UKB infection burden time-dep $$_DATE.xlsm", sheet("FIGURE sensitivity
AD") modify

local j = `i' + 1
quietly: putexcel M`irow'=(x[`j',1]), nformat(number)
quietly: putexcel N`irow'=(y[`j',1]), nformat(number)

local ++irow
local ++irow
}
*P for trend
stcox multiinf_timedep 2.supu#cohort 2.ses#cohort 3.ses#cohort, strata(cohort)
quietly: matrix n = r(table)
matrix list n
tempname p
scalar `p' = n[4,1]
quietly: putexcel set "UKB infection burden time-dep $$_DATE.xlsm", sheet("FIGURE sensitivity
AD") modify

quietly: putexcel Q`prow'=(`p'), nformat(number)

restore

```

\*\*\*\*\*TIME-DEPENDENT: NUMBER OF SIMULTANEOUS INFECTIONS \*\*\*\*\*

```

count
tab anyinfcnt, mis
tab anyinfcnt dementiatype, mis
replace anyinfcnt = . if ensianyinfpvm>=exitpvm
tab anyinfcnt, mis
tab anyinfcnt dementiatype, mis

local dg infcount
local n_dg: word count `dg'
local dg_name ""No. of simultaneous infections""

quietly: local irow = 23
local prow = `irow'
forvalues i=1/`n_dg' {
preserve

```

```

quietly: local idg : word `i' of `dg'
quietly: local idg_name : word `i' of `dg_name'
display ""
display "`idg' followed by broad dementia, adjusted for sex and education"
display ""
display "Pooled IPD-analysis, normal model"
display ""
display "$S_TIME $S_DATE"
display ""

```

entrypvm) scale(365.25)

```

quietly: stset exitpvm, id(id) failure(dementiatype==1) origin(time syntpvm) enter(time

```

```

tab any`idg'
replace any`idg' = 2 if any`idg'>2 & any`idg'<.
tab any`idg'
stsplit `idg'_split, at(0) after(time=ensi`idg'pvm)
tab `idg'_split
gen `idg'_timedep =0
replace `idg'_timedep = any`idg' if inlist(any`idg',1,2) & `idg'_split==0
tab `idg'_timedep
tab any`idg' if `idg'_split!=-1

```

```

stdescribe
quietly: local failures = `r(N_fail)'
stcox i.`idg'_timedep i.supu i.ses
quietly: matrix m = r(table)
matrix list m
tempname hr1 ll1 ul1 hr2 ll2 ul2 hr3 ll3 ul3
scalar `hr1' = m[1,2]
scalar `ll1' = m[5,2]
scalar `ul1' = m[6,2]
scalar `hr2' = m[1,3]
scalar `ll2' = m[5,3]
scalar `ul2' = m[6,3]
scalar `hr3' = m[1,4]
scalar `ll3' = m[5,4]
scalar `ul3' = m[6,4]

```

```

forvalues i =1/2 {
quietly: putexcel set "UKB infection burden time-dep $S_DATE.xlsm", sheet("FIGURE sensitivity

```

AD") modify

```

quietly: putexcel K`irow'=(`e(N_sub)'), nformat(number)
quietly: putexcel L`irow'=(`e(N_fail)'), nformat(number)
quietly: putexcel E`irow'=(`hr`i'), nformat(number_d2)
quietly: putexcel F`irow'=(`ll`i'), nformat(number_d2)
quietly: putexcel G`irow'=(`ul`i'), nformat(number_d2)
quietly: putexcel B`irow'=("Simultaneous infection diagnoses")
quietly: putexcel C`irow'=("UKB")
quietly: putexcel D`irow'=("No. of simultaneous infection diagnoses = `i'")

```

```

tab `idg'_timedep, matcell(x), if `idg'_split!=-1
matrix list x
tab `idg'_timedep dementiatype, matcell(y), if `idg'_split!=-1 & _d==1
matrix list y
quietly: putexcel set "UKB infection burden time-dep $S_DATE.xlsm", sheet("FIGURE sensitivity

```

AD") modify

```

local j = `i' + 1
quietly: putexcel M`irow'=(x[`j',1]), nformat(number)
quietly: putexcel N`irow'=(y[`j',1]), nformat(number)

```

```

        local ++irow
        local ++irow
    }

    *P for trend
    stcox `idg'_timedep i.supu i.ses
    quietly: matrix n = r(table)
    matrix list n
    tempname p
    scalar `p' = n[4,1]
    quietly: putexcel set "UKB infection burden time-dep $$_DATE.xlsm", sheet("FIGURE sensitivity
AD") modify
                                quietly: putexcel O`prow'=(`p'), nformat(number)

        local irow 24
        restore
    }

*TIME-DEPENDENT: FIGURE sensitivity, CNS vs other infections
count
tab anyanycns
recode anyanycns .=0
tab anyanycns
tab anynoncns
recode anynoncns .=0
tab anynoncns
replace anyanycns=0 if ensianycnspvm>=exitpvm
replace anynoncns=0 if ensinoncnspvm>=exitpvm
replace ensianycnspvm=. if ensianycnspvm>=exitpvm
replace ensinoncnspvm=. if ensinoncnspvm>=exitpvm
tab anyanycns
tab anynoncns
tab anyanycns dementiatype
tab anynoncns dementiatype

local dg anycns noncns
local n_dg: word count `dg'
local dg_name ""Any CNS infection" "Any extra-CNS infection""
quietly: local irow = 28
        forvalues i=1/`n_dg' {
            preserve
            quietly: local idg : word `i' of `dg'
            quietly: local idg_name : word `i' of `dg_name'
            display ""
            display "`idg' followed by broad dementia, adjusted for sex and education"
            display ""
            display "UKB replication analysis, normal model and 5-year exclusion"
            display ""
            display "$$_TIME $$_DATE"
            display ""

            stset exitpvm, id(id) failure(dementiatype==1) origin(time syntpvm) enter(time entrypvm)

scale(365.25)

        tab any`idg'
        stsplot `idg'_split, at(0) after(time=ensi`idg'pvm)
        tab `idg'_split

```

```

gen `idg'_timedep =0
replace `idg'_timedep = 1 if any`idg'==1 & `idg'_split==0
tab `idg'_timedep
tab any`idg' if `idg'_split!=-1

stdescribe
quietly: local failures = `r(N_fail)'
stcox `idg'_timedep i.supu i.ses
quietly: matrix m = r(table)
matrix list m
tempname hr ll ul
scalar `hr' = m[1,1]
scalar `ll' = m[5,1]
scalar `ul' = m[6,1]
quietly: putexcel set "UKB infection burden time-dep $$_DATE.xlsm", sheet("FIGURE sensitivity

```

AD") modify

```

quietly: putexcel K`irow'=(`e(N_sub)'), nformat(number)
quietly: putexcel L`irow'=(`e(N_fail)'), nformat(number)
quietly: putexcel E`irow'=(`hr'), nformat(number_d2)
quietly: putexcel F`irow'=(`ll'), nformat(number_d2)
quietly: putexcel G`irow'=(`ul'), nformat(number_d2)
quietly: putexcel B`irow'=("`idg'")
quietly: putexcel C`irow'=("UKB")
quietly: putexcel D`irow'=("`idg_name'")
tab any`idg', matcell(x), if `idg'_split!=-1
matrix list x
tab any`idg' dementiatype, matcell(y), if `idg'_split!=-1 & _d==1
matrix list y
quietly: putexcel set "UKB infection burden time-dep $$_DATE.xlsm", sheet("FIGURE sensitivity

```

AD") modify

```

quietly: putexcel M`irow'=(x[2,1]), nformat(number)
quietly: putexcel N`irow'=(y[2,1]), nformat(number)

local ++irow
local ++irow
restore
}

```

\*TIME-DEPENDENT: Difference between CNS infections and extra-CNS infections

```

*CNS infection vs non cns infection
capture gen byte anycnsnotcns = 1 if ensianycnspvm==ensianyinfpvm & anyanycns==1 &
ensianyinfpvm<exitpvm
replace anycnsnotcns = 0 if ensinoncspvm==ensianyinfpvm & anycnsnotcns!=1 & anynoncns==1 &
ensianyinfpvm<exitpvm
capture gen ensicnsnotcnspvm = ensianyinfpvm if ensianyinfpvm < exitpvm
count
sum ensicnsnotcnspvm
tab anycnsnotcns
tab anyanycns
tab anynoncns
tab anycnsnotcns dementiatype
tab anyanycns dementiatype
tab anynoncns dementiatype

```

```

local dg cnsnotcns
local n_dg: word count `dg'
local dg_name ""CNS vs extra-CNS infection""

```



```

quietly: local irow = 34
        forvalues i=1/`n_dg' {
            preserve
            quietly: local idg : word `i' of `dg'
            quietly: local idg_name : word `i' of `dg_name'
            display ""
            display "`idg' followed by broad dementia, adjusted for sex and education"
            display ""
            display "Pooled IPD-analysis"
            display ""
            display "$S_TIME $S_DATE"
            display ""

            stset exitpvm, id(id) failure(dementiatype==1) origin(time syntpvm) enter(time entrypvm)

scale(365.25)

            gen byte anyeither = ensi`idg'pvm < exitpvm
            tab any`idg'
            tab anyeither

            stsplitt `idg'_split, at(0) after(time=ensi`idg'pvm)
            tab `idg'_split
            gen `idg'_timedep = 0
            replace `idg'_timedep = 1 if anyeither==1 & `idg'_split==0
            tab `idg'_timedep
            tab anyeither if `idg'_split!=-1

            stdescribe
            quietly: local failures = `r(N_fail)'

            tab anyeither if `idg'_split!=-1
            tab `idg'_timedep
            recode `idg'_timedep 1=2 if any`idg'==0
            tab `idg'_timedep
            stcox i.`idg'_timedep supu ses
            test 1.`idg'_timedep = 2.`idg'_timedep

            quietly: putexcel set "UKB infection burden time-dep $S_DATE.xlsm", sheet("FIGURE sensitivity
AD") modify

            quietly: putexcel K`irow'=(`e(N_sub)'), nformat(number)
            quietly: putexcel L`irow'=(`e(N_fail)'), nformat(number)
            quietly: putexcel E`irow'=(`r(p)'), nformat(number_d2)
            quietly: putexcel B`irow'=("`idg'")
            quietly: putexcel C`irow'=("UKB")
            quietly: putexcel D`irow'=("`idg_name'")

            local ++irow

            local ++irow
            restore
        }

```

\*\*\*\* TIME-DEPENDENT: Analysis VASCULAR DEMENTIA \*\*\*\*

\*\*\*\*\*TIME-DEPENDENT: SINGLE VS MULTIPLE INFECTIONS \*\*\*\*\*

count

tab toinenanyinf, mis

tab kolmasanyinf, mis

tab anyanyinf if ensianyinfpvm<exitpvm & ensianyinfpvm < ensitoinenanyinfpvm

tab toinenanyinf if ensitoinenanyinfpvm<exitpvm & ensitoinenanyinfpvm < ensikolmasanyinfpvm

tab kolmasanyinf if ensikolmasanyinfpvm<exitpvm

tab anyanyinf if ensianyinfpvm<exitpvm & ensianyinfpvm < ensitoinenanyinfpvm & ensitoinenanyinfpvm>=exitpvm

tab toinenanyinf if ensitoinenanyinfpvm<exitpvm & ensitoinenanyinfpvm < ensikolmasanyinfpvm &

ensikolmasanyinfpvm>=exitpvm

tab kolmasanyinf if ensikolmasanyinfpvm<exitpvm

tab dementiatype if ensianyinfpvm<exitpvm & ensitoinenanyinfpvm>=exitpvm

tab dementiatype if ensitoinenanyinfpvm<exitpvm & ensikolmasanyinfpvm>=exitpvm

tab dementiatype if ensikolmasanyinfpvm<exitpvm

sum ensianyinfpvm

replace ensianyinfpvm = . if ensianyinfpvm>=exitpvm

sum ensianyinfpvm

sum ensitoinenanyinfpvm

replace ensitoinenanyinfpvm = . if ensitoinenanyinfpvm>=exitpvm

sum ensitoinenanyinfpvm

sum ensikolmasanyinfpvm

replace ensikolmasanyinfpvm = . if ensikolmasanyinfpvm>=exitpvm

sum ensikolmasanyinfpvm

replace toinenanyinf = . if ensitoinenanyinfpvm==.

replace kolmasanyinf = . if ensikolmasanyinfpvm==.

local dg\_name ""Multiple infections""

local irow 16

local prow = `irow'

preserve

stset exitpvm, id(id) failure(dementiatype==4) origin(time syntpvm) enter(time entrypvm)

scale(365.25)

stsplot first\_split, at(0) after(time=ensianyinfpvm)

gen multiinf\_timedep =0

tab multiinf\_timedep

replace multiinf\_timedep = 1 if anyanyinf==1 & first\_split==0

tab multiinf\_timedep

stsplot second\_split, at(0) after(time=ensitoinenanyinfpvm)

```

replace multiinf_timedep = 2 if toinenanyinf==1 & second_split==0
tab multiinf_timedep
stsplot third_split, at(0) after(time=ensikolmasanyinfpvm)
replace multiinf_timedep = 3 if kolmasanyinf==1 & third_split==0
tab multiinf_timedep

```

```

stdescribe
quietly: local failures = `r(N_fail)'
stcox i.multiinf_timedep i.supu i.ses
quietly: matrix m = r(table)
matrix list m
tempname hr1 ll1 ul1 hr2 ll2 ul2 hr3 ll3 ul3
scalar `hr1' = m[1,2]
scalar `ll1' = m[5,2]
scalar `ul1' = m[6,2]
scalar `hr2' = m[1,3]
scalar `ll2' = m[5,3]
scalar `ul2' = m[6,3]
scalar `hr3' = m[1,4]
scalar `ll3' = m[5,4]
scalar `ul3' = m[6,4]

```

```

forvalues i =1/3 {
quietly: putexcel set "UKB infection burden time-dep $$_DATE.xlsm", sheet("FIGURE sensitivity

```

VaD") modify

```

quietly: putexcel K`irow'=(`e(N_sub)'), nformat(number)
quietly: putexcel L`irow'=(`e(N_fail)'), nformat(number)
quietly: putexcel E`irow'=(`hr`i'), nformat(number_d2)
quietly: putexcel F`irow'=(`ll`i'), nformat(number_d2)
quietly: putexcel G`irow'=(`ul`i'), nformat(number_d2)
quietly: putexcel B`irow'=("Multiinf")
quietly: putexcel C`irow'=("UKB")
quietly: putexcel D`irow'=("Single vs multiple infections, infection No. `i'")

```

```

tab multiinf_timedep, matcell(x), if first_split!=-1 & second_split!=-1 & third_split!=-1
matrix list x
tab multiinf_timedep dementiatype, matcell(y), if first_split!=-1 & second_split!=-1 &

```

third\_split!=-1 & \_d==1

```

matrix list y
quietly: putexcel set "UKB infection burden time-dep $$_DATE.xlsm", sheet("FIGURE sensitivity

```

VaD") modify

```

local j = `i' + 1
quietly: putexcel M`irow'=(x[`j',1]), nformat(number)
quietly: putexcel N`irow'=(y[`j',1]), nformat(number)

```

```

local ++irow
local ++irow
}

```

```

*P for trend
stcox multiinf_timedep i.supu i.ses
quietly: matrix n = r(table)
matrix list n
tempname p
scalar `p' = n[4,1]

```

```

quietly: putexcel set "UKB infection burden time-dep $$_DATE.xlsm", sheet("FIGURE sensitivity

```

VaD") modify

```

quietly: putexcel O`prow'=(`p'), nformat(number)

```

```

*Dementia occurring from year 5 onwards
di "Dementia occurring from year 5 onwards"
local i 1
foreach idg in anyinf toinenanyinf kolmasanyinf {
display `i'
replace _t0 = _t0 + 5 if multiinf_timedep==0 & `i'==1
drop if _t0>=_t
gen ensi`idg'pvm5v = ensi`idg'pvm + round(5*365.25) if ensi`idg'pvm<entrypvm
replace ensi`idg'pvm5v = entrypvm if ensi`idg'pvm5v<entrypvm
replace _t0 = (ensi`idg'pvm5v-syntpvm)/365.25 if ensi`idg'pvm5v!=. & multiinf_timedep==`i'
replace _t0 = _t0 + 5 if ensi`idg'pvm5v==. & multiinf_timedep==`i'
drop if _t0>=_t
local ++i
}

```

```

stdescribe
quietly: local failures = `r(N_fail)'
stcox i.multiinf_timedep 2.supu#cohort 2.ses#cohort 3.ses#cohort, strata(cohort)
quietly: matrix m = r(table)
matrix list m
tempname hr1 ll1 ul1 hr2 ll2 ul2 hr3 ll3 ul3
scalar `hr1' = m[1,2]
scalar `ll1' = m[5,2]
scalar `ul1' = m[6,2]
scalar `hr2' = m[1,3]
scalar `ll2' = m[5,3]
scalar `ul2' = m[6,3]
scalar `hr3' = m[1,4]
scalar `ll3' = m[5,4]
scalar `ul3' = m[6,4]

```

```

local irow 17
forvalues i =1/3 {
quietly: putexcel set "UKB infection burden time-dep $$_DATE.xlsx", sheet("FIGURE sensitivity

```

VaD") modify

```

quietly: putexcel K`irow'=(`e(N_sub)'), nformat(number)
quietly: putexcel L`irow'=(`e(N_fail)'), nformat(number)
quietly: putexcel E`irow'=(`hr`i'), nformat(number_d2)
quietly: putexcel F`irow'=(`ll`i'), nformat(number_d2)
quietly: putexcel G`irow'=(`ul`i'), nformat(number_d2)
quietly: putexcel B`irow'=("Multiinf")
quietly: putexcel C`irow'=("UKB")
quietly: putexcel D`irow'=("Dementia occurring more than 5 years after the

```

hospitalisation, infection No. `i'")

```

tab multiinf_timedep, matcell(x), if first_split!=-1 & second_split!=-1 & third_split!=-1
matrix list x
tab multiinf_timedep dementiatype, matcell(y), if first_split!=-1 & second_split!=-1 &

```

third\_split!=-1 & \_d==1

```

matrix list y
quietly: putexcel set "UKB infection burden time-dep $$_DATE.xlsx", sheet("FIGURE sensitivity

```

VaD") modify

```

local j = `i' + 1
quietly: putexcel M`irow'=(x[`,j]), nformat(number)
quietly: putexcel N`irow'=(y[`,j]), nformat(number)

local ++irow
local ++irow
}

```

```

                *P for trend
                local ++prow
                stcox multiinf_timedep i.supu i.ses
                quietly: matrix n = r(table)
                matrix list n
                tempname p
                scalar `p' = n[4,1]
                quietly: putexcel set "UKB infection burden time-dep $$_DATE.xlsm", sheet("FIGURE sensitivity
VaD") modify
                                quietly: putexcel O`prow'=(`p'), nformat(number)
                restore

*****TIME-DEPENDENT: One or several different pathogens *****

local dg_name `""Multiple organisms""'
local idg_name `""Multiple_organisms""'
local irow 37
local prow = `irow'

                preserve
                drop if ses==.
                egen ensibactviralpvm = rowmin(ensibactinfpvm ensiviralinfpvm)
                gen toinenbactviralpvm = ensibactviralpvm if ensibactinfpvm==ensiviralinfpvm &
ensibactinfpvm!=.
                replace toinenbactviralpvm = ensibactinfpvm if ensibactinfpvm>ensiviralinfpvm &
ensibactinfpvm!=.
                replace toinenbactviralpvm = ensiviralinfpvm if ensiviralinfpvm>ensibactinfpvm &
ensiviralinfpvm!=.

                gen anybactviral = 1 if ensibactviralpvm!=.
                gen toinenbactviral = 1 if toinenbactviralpvm!=.
                tab anybactviral
                tab anybactviral if toinenbactviral!=1
                tab toinenbactviral
                tab anybactviral dementiatype
                tab anybactviral dementiatype if toinenbactviral!=1
                tab toinenbactviral dementiatype

                quietly: stset exitpvm, id(id) failure(dementiatype==4) origin(time syntpvm) enter(time
entrypvm) scale(365.25)
                quietly: keep id anybactviral supu cohort exitpvm ensidementia syntpvm entrypvm ensi*pvm
*tainen* _st_d_origin_t_t0 ses
                sum ensibactviralpvm toinenbactviralpvm
                tab anybactviral
                tab toinenbactviral

                stsplit first_split, at(0) after(time=ensibactviralpvm)
                gen multiinf_timedep =0
                tab multiinf_timedep
                replace multiinf_timedep = 1 if anybactviral==1 & first_split==0
                tab multiinf_timedep
                stsplit second_split, at(0) after(time=toinenbactviralpvm)
                replace multiinf_timedep = 2 if toinenbactviral==1 & second_split==0
                tab multiinf_timedep

                quietly: stdescribe
                quietly: local failures = `r(N_fail)'
                stcox i.multiinf_timedep 2.supu#cohort 2.ses#cohort 3.ses#cohort, strata(cohort)

```

```

quietly: matrix m = r(table)
matrix list m
tempname hr1 ll1 ul1 hr2 ll2 ul2
scalar `hr1' = m[1,2]
scalar `ll1' = m[5,2]
scalar `ul1' = m[6,2]
scalar `hr2' = m[1,3]
scalar `ll2' = m[5,3]
scalar `ul2' = m[6,3]

```

VaD") modify

```

forvalues i =1/2 {
quietly: putexcel set "UKB infection burden time-dep $$_DATE.xlsm", sheet("FIGURE sensitivity

```

```

quietly: putexcel K`irow'=(`e(N_sub)'), nformat(number)
quietly: putexcel L`irow'=(`e(N_fail)'), nformat(number)
quietly: putexcel E`irow'=(`hr`i'), nformat(number_d2)
quietly: putexcel F`irow'=(`ll`i'), nformat(number_d2)
quietly: putexcel G`irow'=(`ul`i'), nformat(number_d2)
quietly: putexcel B`irow'=("`idg_name")
quietly: putexcel C`irow'=("UKB")
quietly: putexcel D`irow'=("Different micro-organisms, infection No. `i")

```

```

tab multiinf_timedep, matcell(x), if first_split!=-1 & second_split!=-1
matrix list x
tab multiinf_timedep ensidementia, matcell(y), if first_split!=-1 & second_split!=-1 & _d==1
matrix list y
quietly: putexcel set "UKB infection burden time-dep $$_DATE.xlsm", sheet("FIGURE sensitivity

```

VaD") modify

```

local j = `i' + 1
quietly: putexcel M`irow'=(x[`j',1]), nformat(number)
quietly: putexcel N`irow'=(y[`j',1]), nformat(number)

```

```

local ++irow
local ++irow
}
*P for trend
stcox multiinf_timedep 2.supu#cohort 2.ses#cohort 3.ses#cohort, strata(cohort)
quietly: matrix n = r(table)
matrix list n
tempname p
scalar `p' = n[4,1]
quietly: putexcel set "UKB infection burden time-dep $$_DATE.xlsm", sheet("FIGURE sensitivity

```

VaD") modify

```

quietly: putexcel Q`prow'=(`p'), nformat(number)

```

```

restore

```

\*\*\*\*\*TIME-DEPENDENT: NUMBER OF SIMULTANEOUS INFECTIONS \*\*\*\*\*

```

count
tab anyinfcount, mis
tab anyinfcount dementiatype, mis
replace anyinfcount = . if ensianyinfpvm>=exitpvm
tab anyinfcount, mis
tab anyinfcount dementiatype, mis

```

```

local dg infcount
local n_dg: word count `dg'

```

```

local dg_name `""No. of simultaneous infections""`

quietly: local irow = 23
local prow = `irow'
    forvalues i=1/`n_dg' {
        preserve
        quietly: local idg : word `i' of `dg'
        quietly: local idg_name : word `i' of `dg_name'
        display ""
        display ""`idg' followed by broad dementia, adjusted for sex and education"
        display ""
        display "Pooled IPD-analysis, normal model"
        display ""
        display "$S_TIME $S_DATE"
        display ""

        quietly: stset exitpvm, id(id) failure(dementiatype==4) origin(time syntpvm) enter(time
entrypvm) scale(365.25)

        tab any`idg'
        replace any`idg' = 2 if any`idg'>2 & any`idg'<.
        tab any`idg'
        stsplint `idg'_split, at(0) after(time=ensi`idg'pvm)
        tab `idg'_split
        gen `idg'_timedep =0
        replace `idg'_timedep = any`idg' if inlist(any`idg',1,2) & `idg'_split==0
        tab `idg'_timedep
        tab any`idg' if `idg'_split!=-1

        stdescribe
        quietly: local failures = `r(N_fail)'
        stcox i.`idg'_timedep i.supu i.ses
        quietly: matrix m = r(table)
        matrix list m
        tempname hr1 ll1 ul1 hr2 ll2 ul2 hr3 ll3 ul3
        scalar `hr1' = m[1,2]
        scalar `ll1' = m[5,2]
        scalar `ul1' = m[6,2]
        scalar `hr2' = m[1,3]
        scalar `ll2' = m[5,3]
        scalar `ul2' = m[6,3]
        scalar `hr3' = m[1,4]
        scalar `ll3' = m[5,4]
        scalar `ul3' = m[6,4]

        forvalues i =1/2 {
            quietly: putexcel set "UKB infection burden time-dep $S_DATE.xlsm", sheet("FIGURE sensitivity
VaD") modify

                quietly: putexcel K`irow'=(`e(N_sub)'), nformat(number)
                quietly: putexcel L`irow'=(`e(N_fail)'), nformat(number)
                quietly: putexcel E`irow'=(`hr`i'), nformat(number_d2)
                quietly: putexcel F`irow'=(`ll`i'), nformat(number_d2)
                quietly: putexcel G`irow'=(`ul`i'), nformat(number_d2)
                quietly: putexcel B`irow'=("Simultaneous infection diagnoses")
                quietly: putexcel C`irow'=("UKB")
                quietly: putexcel D`irow'=("No. of simultaneous infection diagnoses = `i'")
            tab `idg'_timedep, matcell(x), if `idg'_split!=-1
            matrix list x
            tab `idg'_timedep dementiatype, matcell(y), if `idg'_split!=-1 & _d==1

```

```

matrix list y
quietly: putexcel set "UKB infection burden time-dep $$_DATE.xlsx", sheet("FIGURE sensitivity
VaD") modify

        local j = `i' + 1
        quietly: putexcel M`irow'=(x[`j',1]), nformat(number)
        quietly: putexcel N`irow'=(y[`j',1]), nformat(number)

local ++irow
local ++irow
}

*P for trend
stcox `idg'_timedep i.supu i.ses
quietly: matrix n = r(table)
matrix list n
tempname p
scalar `p' = n[4,1]
quietly: putexcel set "UKB infection burden time-dep $$_DATE.xlsx", sheet("FIGURE sensitivity
VaD") modify

        quietly: putexcel O`prow'=(`p'), nformat(number)

restore
}

```

\*TIME-DEPENDENT: FIGURE sensitivity, CNS vs other infections

```

count
tab anyanycns
recode anyanycns .=0
tab anyanycns
tab anynoncns
recode anynoncns .=0
tab anynoncns
replace anyanycns=0 if ensianycnspvm>=exitpvm
replace anynoncns=0 if ensinoncnspvm>=exitpvm
replace ensianycnspvm=. if ensianycnspvm>=exitpvm
replace ensinoncnspvm=. if ensinoncnspvm>=exitpvm
tab anyanycns
tab anynoncns
tab anyanycns dementiatype
tab anynoncns dementiatype

```

```

local dg anycns noncns
local n_dg: word count `dg'
local dg_name ""Any CNS infection" "Any extra-CNS infection""
quietly: local irow = 28
        forvalues i=1/`n_dg' {
                preserve
                quietly: local idg : word `i' of `dg'
                quietly: local idg_name : word `i' of `dg_name'
                display ""
                display "`idg' followed by broad dementia, adjusted for sex and education"
                display ""
                display "UKB replication analysis, normal model and 5-year exclusion"
                display ""
                display "$$_TIME $$_DATE"
                display ""

```



```

scale(365.25)          stset exitpvm, id(id) failure(dementiatype==4) origin(time syntpvm) enter(time entrypvm)

                      tab any`idg'
                      stsplit `idg'_split, at(0) after(time=ensi`idg'pvm)
                      tab `idg'_split
                      gen `idg'_timedep =0
                      replace `idg'_timedep = 1 if any`idg'==1 & `idg'_split==0
                      tab `idg'_timedep
                      tab any`idg' if `idg'_split!=-1

                      stdescribe
                      quietly: local failures = `r(N_fail)'
                      stcox `idg'_timedep i.supu i.ses
                      quietly: matrix m = r(table)
                      matrix list m
                      tempname hr ll ul
                      scalar `hr' = m[1,1]
                      scalar `ll' = m[5,1]
                      scalar `ul' = m[6,1]
                      quietly: putexcel set "UKB infection burden time-dep $$_DATE.xlsx", sheet("FIGURE sensitivity
VaD") modify          quietly: putexcel K`irow'=(`e(N_sub)'), nformat(number)
                      quietly: putexcel L`irow'=(`e(N_fail)'), nformat(number)
                      quietly: putexcel E`irow'=(`hr'), nformat(number_d2)
                      quietly: putexcel F`irow'=(`ll'), nformat(number_d2)
                      quietly: putexcel G`irow'=(`ul'), nformat(number_d2)
                      quietly: putexcel B`irow'=("`idg'")
                      quietly: putexcel C`irow'=("UKB")
                      quietly: putexcel D`irow'=("`idg_name'")
                      tab any`idg', matcell(x), if `idg'_split!=-1
                      matrix list x
                      tab any`idg' dementiatype, matcell(y), if `idg'_split!=-1 & _d==1
                      matrix list y
                      quietly: putexcel set "UKB infection burden time-dep $$_DATE.xlsx", sheet("FIGURE sensitivity
VaD") modify          quietly: putexcel M`irow'=(x[2,1]), nformat(number)
                      quietly: putexcel N`irow'=(y[2,1]), nformat(number)

                      local ++irow
                      local ++irow
                      restore
                      }

```

\*TIME-DEPENDENT: Difference between CNS infections and extra-CNS infections

```

                      *CNS infection vs non cns infection
                      capture gen byte anycnsnotcns = 1 if ensianycnspvm==ensianyinfpvm & anyanycns==1 &
ensianyinfpvm<exitpvm
                      replace anycnsnotcns = 0 if ensinoncspvm==ensianyinfpvm & anycnsnotcns!=1 & anynoncns==1 &
ensianyinfpvm<exitpvm
                      capture gen ensicnsnotcnspvm = ensianyinfpvm if ensianyinfpvm < exitpvm
                      count
                      sum ensicnsnotcnspvm
                      tab anycnsnotcns
                      tab anyanycns
                      tab anynoncns
                      tab anycnsnotcns dementiatype
                      tab anyanycns dementiatype
                      tab anynoncns dementiatype

```

```

local dg cnsnotcns
local n_dg: word count `dg'
local dg_name `"'CNS vs extra-CNS infection'"
quietly: local irow = 34
    forvalues i=1/`n_dg' {
        preserve
        quietly: local idg : word `i' of `dg'
        quietly: local idg_name : word `i' of `dg_name'
        display ""
        display "`idg' followed by broad dementia, adjusted for sex and education"
        display ""
        display "Pooled IPD-analysis"
        display ""
        display "$S_TIME $S_DATE"
        display ""

        stset exitpvm, id(id) failure(dementiatype==4) origin(time syntpvm) enter(time entrypvm)

scale(365.25)

        gen byte anyeither = ensi`idg'pvm < exitpvm
        tab any`idg'
        tab anyeither

        stsplitt `idg'_split, at(0) after(time=ensi`idg'pvm)
        tab `idg'_split
        gen `idg'_timedep = 0
        replace `idg'_timedep = 1 if anyeither==1 & `idg'_split==0
        tab `idg'_timedep
        tab anyeither if `idg'_split!=-1

        stdescribe
        quietly: local failures = `r(N_fail)'

        tab anyeither if `idg'_split!=-1
        tab `idg'_timedep
        recode `idg'_timedep 1=2 if any`idg'==0
        tab `idg'_timedep
        stcox i.`idg'_timedep supu ses
        test 1.`idg'_timedep = 2.`idg'_timedep

        quietly: putexcel set "UKB infection burden time-dep $S_DATE.xlsm", sheet("FIGURE sensitivity
VaD") modify

        quietly: putexcel K`irow'=(`e(N_sub)'), nformat(number)
        quietly: putexcel L`irow'=(`e(N_fail)'), nformat(number)
        quietly: putexcel E`irow'=(`r(p)'), nformat(number_d2)
        quietly: putexcel B`irow'=("`idg'")
        quietly: putexcel C`irow'=("UKB")
        quietly: putexcel D`irow'=("`idg_name'")

        local ++irow

        restore
    }

log close

```
